# Supplementary material for: Metal Complexes Containing Homoleptic Diorganoselenium(II) Ligands: Synthesis, Characterization and Investigation of Optical Properties
Source: MDPI journal article supplement (doi:10.3390/molecules29040792), 2024-02-08

## checkCIF/PLATON report

Structure factors have been supplied for datablock(s) ale288

THIS REPORT IS FOR GUIDANCE ONLY. IF USED AS PART OF A REVIEW PROCEDURE FOR PUBLICATION, IT SHOULD NOT REPLACE THE EXPERTISE OF AN EXPERIENCED CRYSTALLOGRAPHIC REFEREE.

No syntax errors found.      CIF dictionary      Interpreting this report

### Datablock: ale288

---

|                 |                                              |                                       |
|-----------------|----------------------------------------------|---------------------------------------|
| Bond precision: | C-C = 0.0132 A                               | Wavelength=0.71073                    |
| Cell:           | a=11.2955(13)                                | b=13.2811(15)      c=17.903(2)        |
|                 | alpha=84.806(3)                              | beta=81.693(3)      gamma=88.358(4)   |
| Temperature:    | 100 K                                        |                                       |
|                 | Calculated                                   | Reported                              |
| Volume          | 2646.3(5)                                    | 2646.3(5)                             |
| Space group     | P -1                                         | P -1                                  |
| Hall group      | -P 1                                         | -P 1                                  |
| Moiety formula  | C68 H40 Ag4 F12 N4 O20 S4<br>Se2, 8(C H Cl3) | ?                                     |
| Sum formula     | C76 H48 Ag4 Cl24 F12 N4 O20<br>S4 Se2        | C76 H48 Ag4 Cl24 F12 N4 O20<br>S4 Se2 |
| Mr              | 3133.63                                      | 3133.62                               |
| Dx, g cm-3      | 1.966                                        | 1.966                                 |
| Z               | 1                                            | 1                                     |
| Mu (mm-1)       | 2.188                                        | 2.188                                 |
| F000            | 1528.0                                       | 1528.0                                |
| F000'           | 1528.92                                      |                                       |
| h, k, lmax      |                                              | 13, 15, 21                            |
| Nref            |                                              | 9332                                  |
| Tmin, Tmax      | 0.845, 0.951                                 | 0.780, 0.950                          |
| Tmin'           | 0.838                                        |                                       |

Correction method= # Reported T Limits: Tmin=0.780 Tmax=0.950

AbsCorr = MULTII-SCAN

Data completeness=

Theta(max)= 25.000

R(reflections)= 0.0669( 6615)

wR2(reflections)=  
0.1764( 9332)

S = 1.036

Npar= 658

The following ALERTS were generated. Each ALERT has the format

**test-name\_ALERT\_alert-type\_alert-level.**

Click on the hyperlinks for more details of the test.

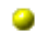

### Alert level C

RINTA01\_ALERT\_3\_C The value of Rint is greater than 0.12

Rint given 0.121

|                   |                                                 |                             |         |        |
|-------------------|-------------------------------------------------|-----------------------------|---------|--------|
| PLAT213_ALERT_2_C | Atom O5                                         | has ADP max/min Ratio ..... | 3.1     | prolat |
| PLAT234_ALERT_4_C | Large Hirshfeld Difference C11                  | --C16                       | 0.16    | Ang.   |
| PLAT241_ALERT_2_C | High 'MainMol' Ueq as Compared to Neighbors of  |                             | O5      | Check  |
| PLAT242_ALERT_2_C | Low 'MainMol' Ueq as Compared to Neighbors of   |                             | S1      | Check  |
| PLAT244_ALERT_4_C | Low 'Solvent' Ueq as Compared to Neighbors of   |                             | C35     | Check  |
| PLAT244_ALERT_4_C | Low 'Solvent' Ueq as Compared to Neighbors of   |                             | C36     | Check  |
| PLAT244_ALERT_4_C | Low 'Solvent' Ueq as Compared to Neighbors of   |                             | C37     | Check  |
| PLAT342_ALERT_3_C | Low Bond Precision on C-C Bonds .....           |                             | 0.01319 | Ang.   |
| PLAT906_ALERT_3_C | Large K Value in the Analysis of Variance ..... |                             | 5.706   | Check  |
| PLAT971_ALERT_2_C | Check Calcd Resid. Dens.                        | 1.17Ang From C17            | 2.47    | eA-3   |
| PLAT971_ALERT_2_C | Check Calcd Resid. Dens.                        | 1.08Ang From Ag2            | 1.81    | eA-3   |
| PLAT971_ALERT_2_C | Check Calcd Resid. Dens.                        | 1.11Ang From Ag2            | 1.51    | eA-3   |
| PLAT972_ALERT_2_C | Check Calcd Resid. Dens.                        | 0.82Ang From C17            | -1.56   | eA-3   |

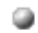

### Alert level G

|                   |                                                  |       |              |
|-------------------|--------------------------------------------------|-------|--------------|
| PLAT020_ALERT_3_G | The Value of Rint is Greater Than 0.12 .....     | 0.121 | Report       |
| PLAT083_ALERT_2_G | SHELXL Second Parameter in WGHT Unusually Large  | 33.54 | Why ?        |
| PLAT242_ALERT_2_G | Low 'MainMol' Ueq as Compared to Neighbors of    |       | C33 Check    |
| PLAT242_ALERT_2_G | Low 'MainMol' Ueq as Compared to Neighbors of    |       | C34 Check    |
| PLAT398_ALERT_2_G | Deviating C-O-C Angle From 120 for O1            | 105.0 | Degree       |
| PLAT398_ALERT_2_G | Deviating C-O-C Angle From 120 for O3            | 105.3 | Degree       |
| PLAT431_ALERT_2_G | Short Inter HL..A Contact C110 ..03              | 3.13  | Ang.         |
|                   | 1-x,-y,2-z =                                     | 2_657 | Check        |
| PLAT790_ALERT_4_G | Centre of Gravity not Within Unit Cell: Resd. #  | 4     | Note         |
|                   | C H C13                                          |       |              |
| PLAT883_ALERT_1_G | No Info/Value for _atom_sites_solution_primary   |       | Please Do !  |
| PLAT909_ALERT_3_G | Percentage of I>2sig(I) Data at Theta(Max) Still | 42%   | Note         |
| PLAT910_ALERT_3_G | Missing # of FCF Reflection(s) Below Theta(Min). | 4     | Note         |
|                   | 1 0 0, 0 1 0, 0 0 1, 0 1 1,                      |       |              |
| PLAT961_ALERT_5_G | Dataset Contains no Negative Intensities .....   |       | Please Check |
| PLAT967_ALERT_5_G | Note: Two-Theta Cutoff Value in Embedded .res .. | 50.0  | Degree       |
| PLAT978_ALERT_2_G | Number C-C Bonds with Positive Residual Density. | 0     | Info         |

- 
- 0 **ALERT level A** = Most likely a serious problem - resolve or explain  
0 **ALERT level B** = A potentially serious problem, consider carefully  
14 **ALERT level C** = Check. Ensure it is not caused by an omission or oversight  
14 **ALERT level G** = General information/check it is not something unexpected
- 
- 1 ALERT type 1 CIF construction/syntax error, inconsistent or missing data

14 ALERT type 2 Indicator that the structure model may be wrong or deficient  
6 ALERT type 3 Indicator that the structure quality may be low  
5 ALERT type 4 Improvement, methodology, query or suggestion  
2 ALERT type 5 Informative message, check

---

---

It is advisable to attempt to resolve as many as possible of the alerts in all categories. Often the minor alerts point to easily fixed oversights, errors and omissions in your CIF or refinement strategy, so attention to these fine details can be worthwhile. In order to resolve some of the more serious problems it may be necessary to carry out additional measurements or structure refinements. However, the purpose of your study may justify the reported deviations and the more serious of these should normally be commented upon in the discussion or experimental section of a paper or in the "special\_details" fields of the CIF. checkCIF was carefully designed to identify outliers and unusual parameters, but every test has its limitations and alerts that are not important in a particular case may appear. Conversely, the absence of alerts does not guarantee there are no aspects of the results needing attention. It is up to the individual to critically assess their own results and, if necessary, seek expert advice.

### **Publication of your CIF in IUCr journals**

A basic structural check has been run on your CIF. These basic checks will be run on all CIFs submitted for publication in IUCr journals (*Acta Crystallographica*, *Journal of Applied Crystallography*, *Journal of Synchrotron Radiation*); however, if you intend to submit to *Acta Crystallographica Section C* or *E* or *IUCrData*, you should make sure that full publication checks are run on the final version of your CIF prior to submission.

### **Publication of your CIF in other journals**

Please refer to the *Notes for Authors* of the relevant journal for any special instructions relating to CIF submission.

---

**PLATON version of 14/11/2023; check.def file version of 14/09/2023**

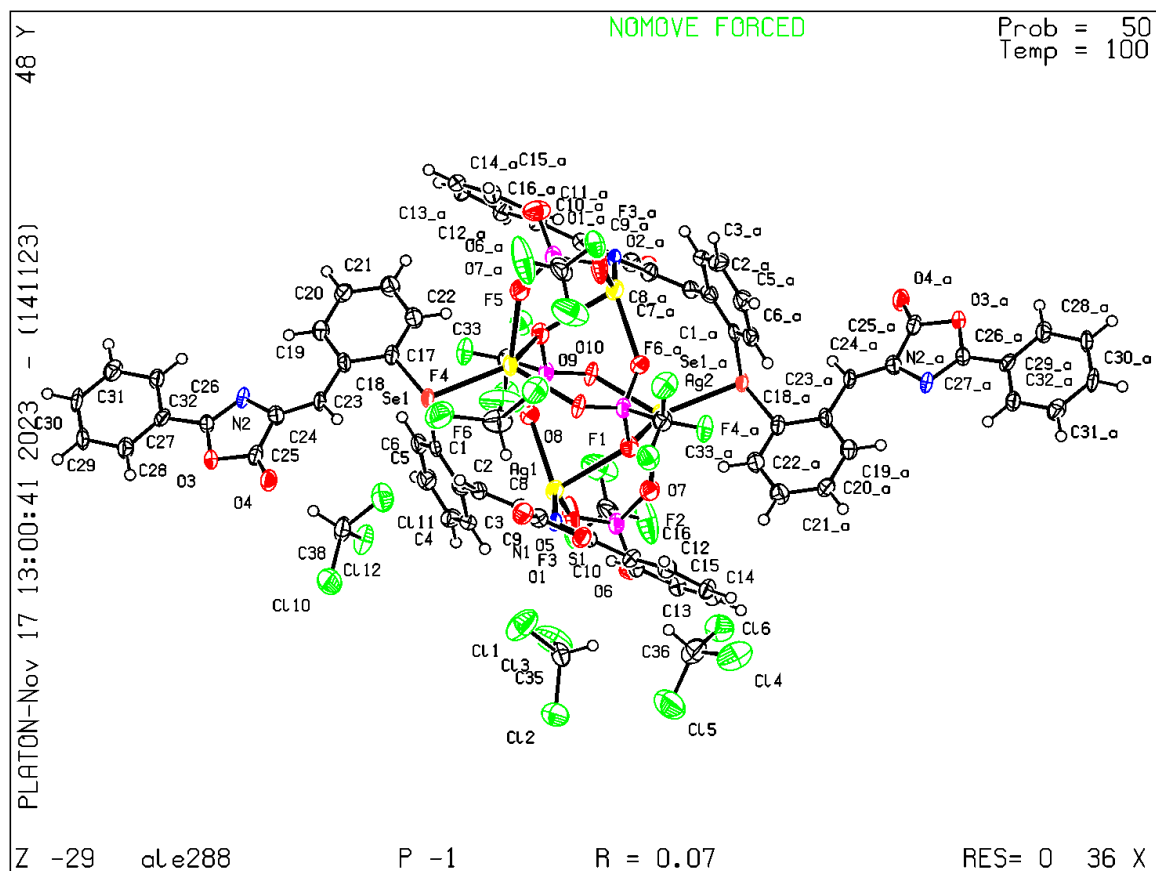

Supplement: s1 [file s1]
