# Supplementary material for: Metal Complexes Containing Homoleptic Diorganoselenium(II) Ligands: Synthesis, Characterization and Investigation of Optical Properties
Source: MDPI journal article supplement (doi:10.3390/molecules29040792), 2024-02-08
Supplement: s1 [file s1]

**Electronic Supporting Information (ESI) for**

**Metal Complexes Containing Homoleptic Diorganoselenium(II) Ligands: Synthesis,  
Characterization and Investigation of Optical Properties**

Darius Dumitraş,<sup>1</sup> Emese Gal,<sup>2</sup> Cristian Silvestru<sup>1</sup> and Alexandra Pop<sup>1,\*</sup>

<sup>1</sup> Supramolecular Organic and Organometallic Chemistry Centre, Department of Chemistry, Faculty of Chemistry and Chemical Engineering, Babeş-Bolyai University, Str. Arany Janos 11, RO-400028 Cluj-Napoca, România.

<sup>2</sup> Research Center on Fundamental and Applied Heterochemistry, Faculty of Chemistry and Chemical Engineering, Babeş-Bolyai University, Str. Arany Janos 11, RO-400028, Cluj-Napoca, România

Corresponding author: Alexandra Pop

E-mail: alexandra.m.pop@ubbcluj.ro; Tel: (+40) 264-593833.

## Contents

### Figures and Schemes

|                                                                                                              |    |
|--------------------------------------------------------------------------------------------------------------|----|
| Figure S1. $^1\text{H}$ NMR spectra ( $\text{CDCl}_3$ ) of <b>1</b> (a), <b>3</b> (b) and <b>5</b> (c).....  | S3 |
| Figure S2. $^1\text{H}$ NMR spectra ( $\text{CDCl}_3$ ) of <b>2</b> (a), <b>4</b> (b) and <b>6</b> (c) ..... | S4 |
| Figure S3. $^1\text{H}$ NMR spectra of <b>5</b> , <b>7</b> , <b>11</b> , <b>13</b> and <b>15</b> .....       | S4 |
| Figure S4. $^1\text{H}$ NMR spectra of <b>6</b> , <b>8</b> , <b>12</b> , <b>14</b> and <b>16</b> .....       | S5 |
| Figure S5. UV–Vis absorption spectra of <b>5</b> and <b>6</b> .....                                          | S5 |
| Figure S6. Absorption and emission spectra of <b>5</b> and <b>6</b> .....                                    | S6 |

### X-ray diffraction crystallography.....S6

|                                                                                                  |    |
|--------------------------------------------------------------------------------------------------|----|
| Figure S7. View of the supramolecular 3D network in <b>4</b> .....                               | S6 |
| Figure S8. View of the supramolecular 2D network in <b>5</b> .....                               | S7 |
| Figure S9. Polymeric chain association in the crystal of <b>9</b> .....                          | S7 |
| Figure S10. View of the supramolecular 2D network in <b>9</b> .....                              | S8 |
| Table S1. Crystal data and details of data collection for <b>4</b> , <b>5</b> and <b>9</b> ..... | S9 |

### NMR spectra

|                                                                                                                                                                |     |
|----------------------------------------------------------------------------------------------------------------------------------------------------------------|-----|
| Figures S11-S12, $^1\text{H}$ and $^{77}\text{Se}\{^1\text{H}\}$ NMR spectra of <b>1</b> .....                                                                 | S10 |
| Figure S13-S15, $^1\text{H}$ , $^{13}\text{C}\{^1\text{H}\}$ and $^{77}\text{Se}\{^1\text{H}\}$ NMR spectra of <b>2</b> .....                                  | S11 |
| Figure S16, $^1\text{H}$ NMR spectrum of <b>3</b> .....                                                                                                        | S12 |
| Figure S17-S19, $^1\text{H}$ , $^{13}\text{C}\{^1\text{H}\}$ and $^{77}\text{Se}\{^1\text{H}\}$ NMR spectra of <b>4</b> .....                                  | S13 |
| Figure S120-22, $^1\text{H}$ , $^{13}\text{C}\{^1\text{H}\}$ and $^{77}\text{Se}\{^1\text{H}\}$ NMR spectra of <b>5</b> .....                                  | S14 |
| Figure S23-25, $^1\text{H}$ , $^{13}\text{C}\{^1\text{H}\}$ and $^{77}\text{Se}\{^1\text{H}\}$ NMR spectra of <b>6</b> .....                                   | S16 |
| Figure S26-28, $^1\text{H}$ , $^{13}\text{C}\{^1\text{H}\}$ and $^{19}\text{F}\{^1\text{H}\}$ NMR spectrum of <b>7</b> .....                                   | S17 |
| Figure S29-31, $^1\text{H}$ , $^{13}\text{C}\{^1\text{H}\}$ and $^{19}\text{F}\{^1\text{H}\}$ NMR spectrum of <b>9</b> .....                                   | S19 |
| Figure S32-34, $^1\text{H}$ , $^{13}\text{C}\{^1\text{H}\}$ and $^{19}\text{F}\{^1\text{H}\}$ NMR spectrum of <b>8</b> .....                                   | S20 |
| Figure S35-37, $^1\text{H}$ , $^{13}\text{C}\{^1\text{H}\}$ and $^{19}\text{F}\{^1\text{H}\}$ NMR spectrum of <b>10</b> .....                                  | S22 |
| Figure S38-41, $^1\text{H}$ , $^{13}\text{C}\{^1\text{H}\}$ , $^{19}\text{F}\{^1\text{H}\}$ and $^{31}\text{P}\{^1\text{H}\}$ NMR spectrum of <b>11</b> .....  | S23 |
| Figures S42-S45, $^1\text{H}$ , $^{13}\text{C}\{^1\text{H}\}$ , $^{19}\text{F}\{^1\text{H}\}$ and $^{31}\text{P}\{^1\text{H}\}$ NMR spectra of <b>12</b> ..... | S25 |
| Figure S46-48, $^1\text{H}$ , $^{13}\text{C}\{^1\text{H}\}$ and $^{77}\text{Se}\{^1\text{H}\}$ NMR spectra of <b>13</b> .....                                  | S27 |
| Figure S49-51, $^1\text{H}$ , $^{13}\text{C}\{^1\text{H}\}$ and $^{77}\text{Se}\{^1\text{H}\}$ NMR spectra of <b>14</b> .....                                  | S29 |
| Figure S52-53, $^1\text{H}$ and $^{13}\text{C}\{^1\text{H}\}$ NMR spectra of <b>15</b> .....                                                                   | S30 |
| Figure S54-56, $^1\text{H}$ , $^{13}\text{C}\{^1\text{H}\}$ and $^{77}\text{Se}\{^1\text{H}\}$ NMR spectra of <b>16</b> .....                                  | S31 |

# Molecules

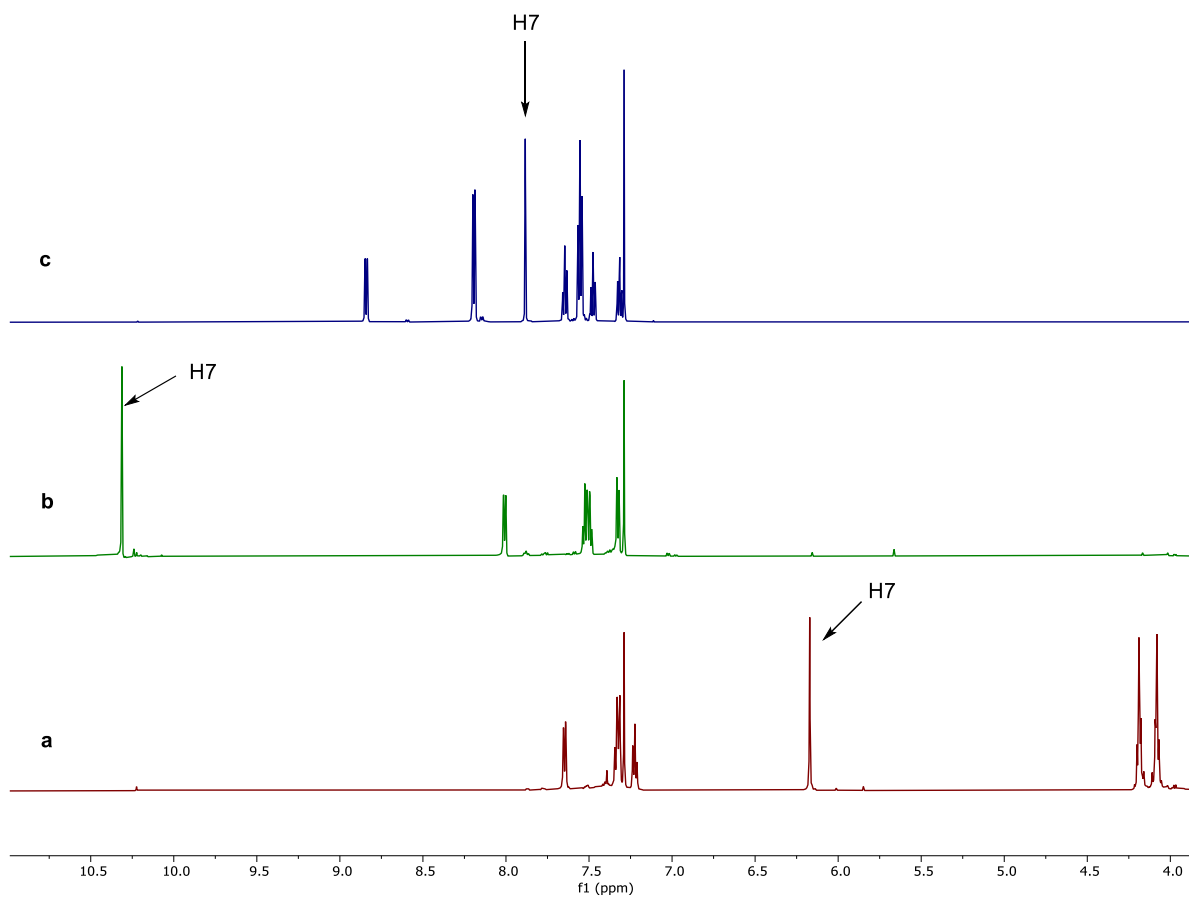

**Figure S1.**  $^1\text{H}$  NMR spectra (CDCl<sub>3</sub>) of **1** (a), **3** (b) and **5** (c).

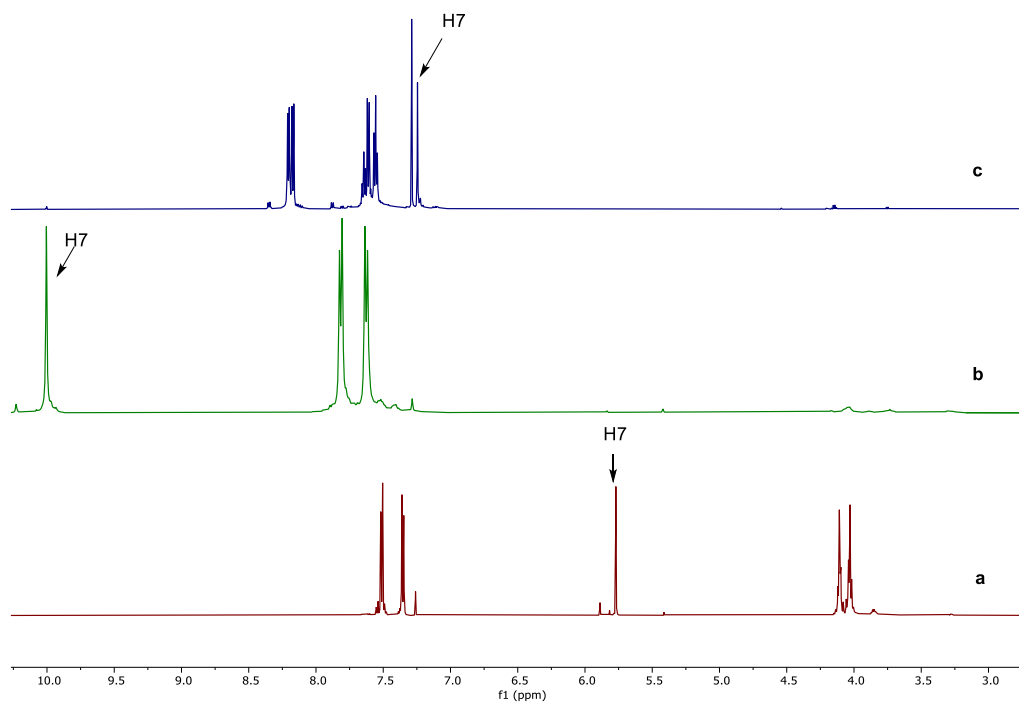

**Figure S2.**  $^1\text{H}$  NMR spectra (CDCl<sub>3</sub>) of **2** (a), **4** (b) and **6** (c).

# Molecules

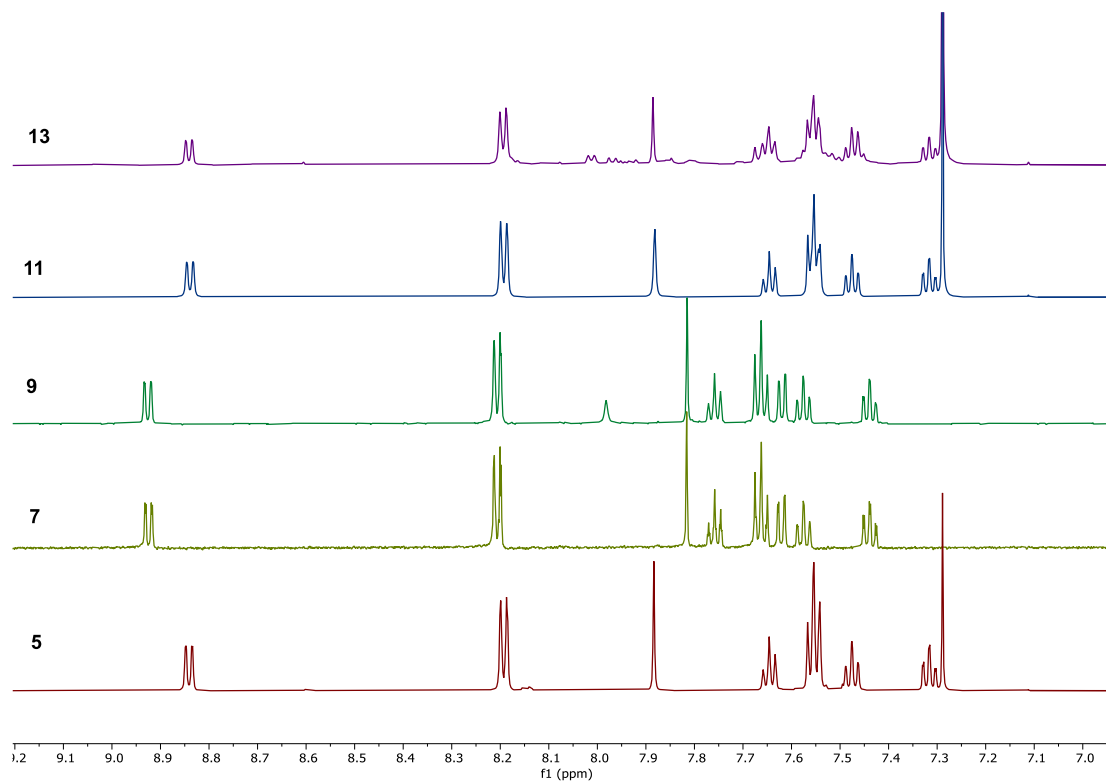

**Figure S3.**  $^1\text{H}$  NMR spectra of **5** ( $\text{CDCl}_3$ ), **7** ( $\text{acetone-}d_6$ ), **11** ( $\text{acetone-}d_6$ ), **13** ( $\text{CDCl}_3$ ) and **15** ( $\text{CDCl}_3$ ).

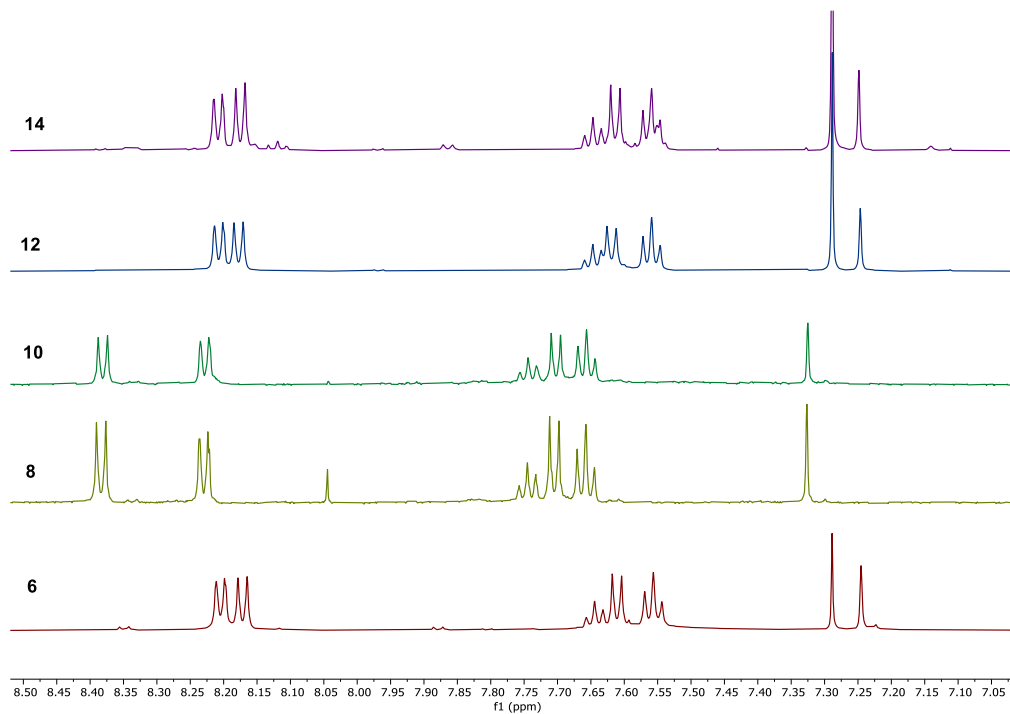

**Figure S4.**  $^1\text{H}$  NMR spectra of **6** ( $\text{CDCl}_3$ ), **8** ( $\text{acetone-}d_6$ ), **12** ( $\text{acetone-}d_6$ ), **14** ( $\text{CDCl}_3$ ) and **16** ( $\text{CDCl}_3$ ).

## Molecules

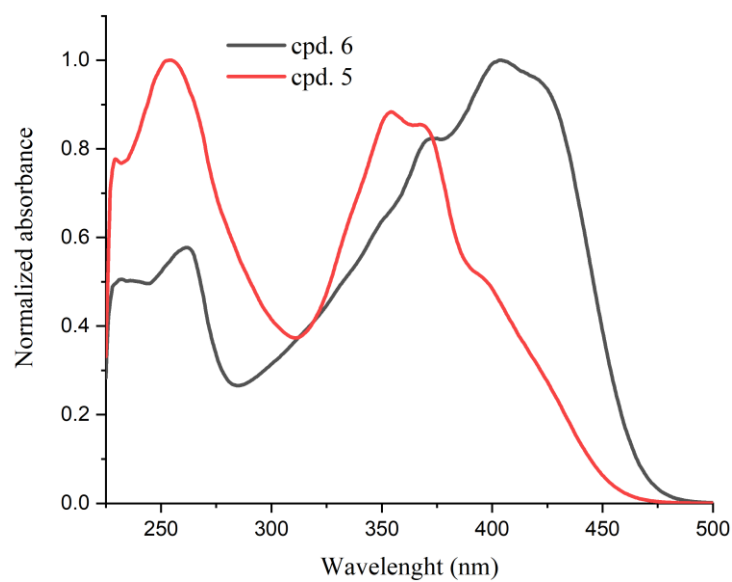

**Figure S5.** UV-Vis absorption spectra of **5** and **6**.

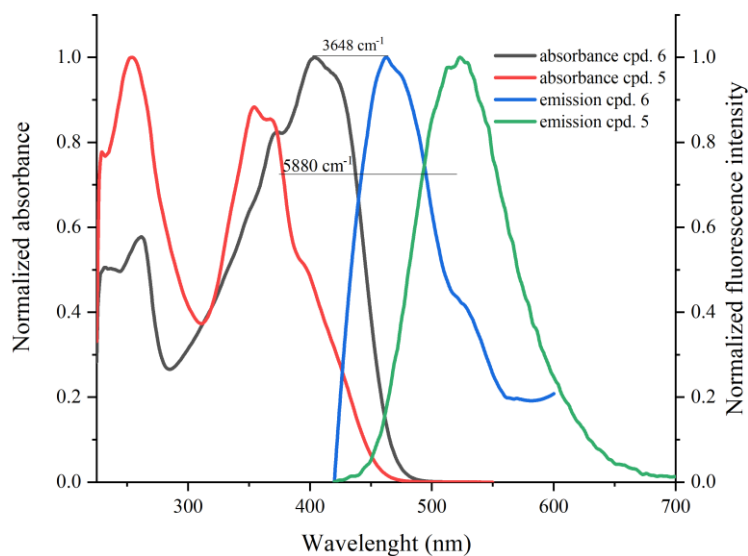

**Figure S6.** Absorption and emission spectra of **5** and **6**.

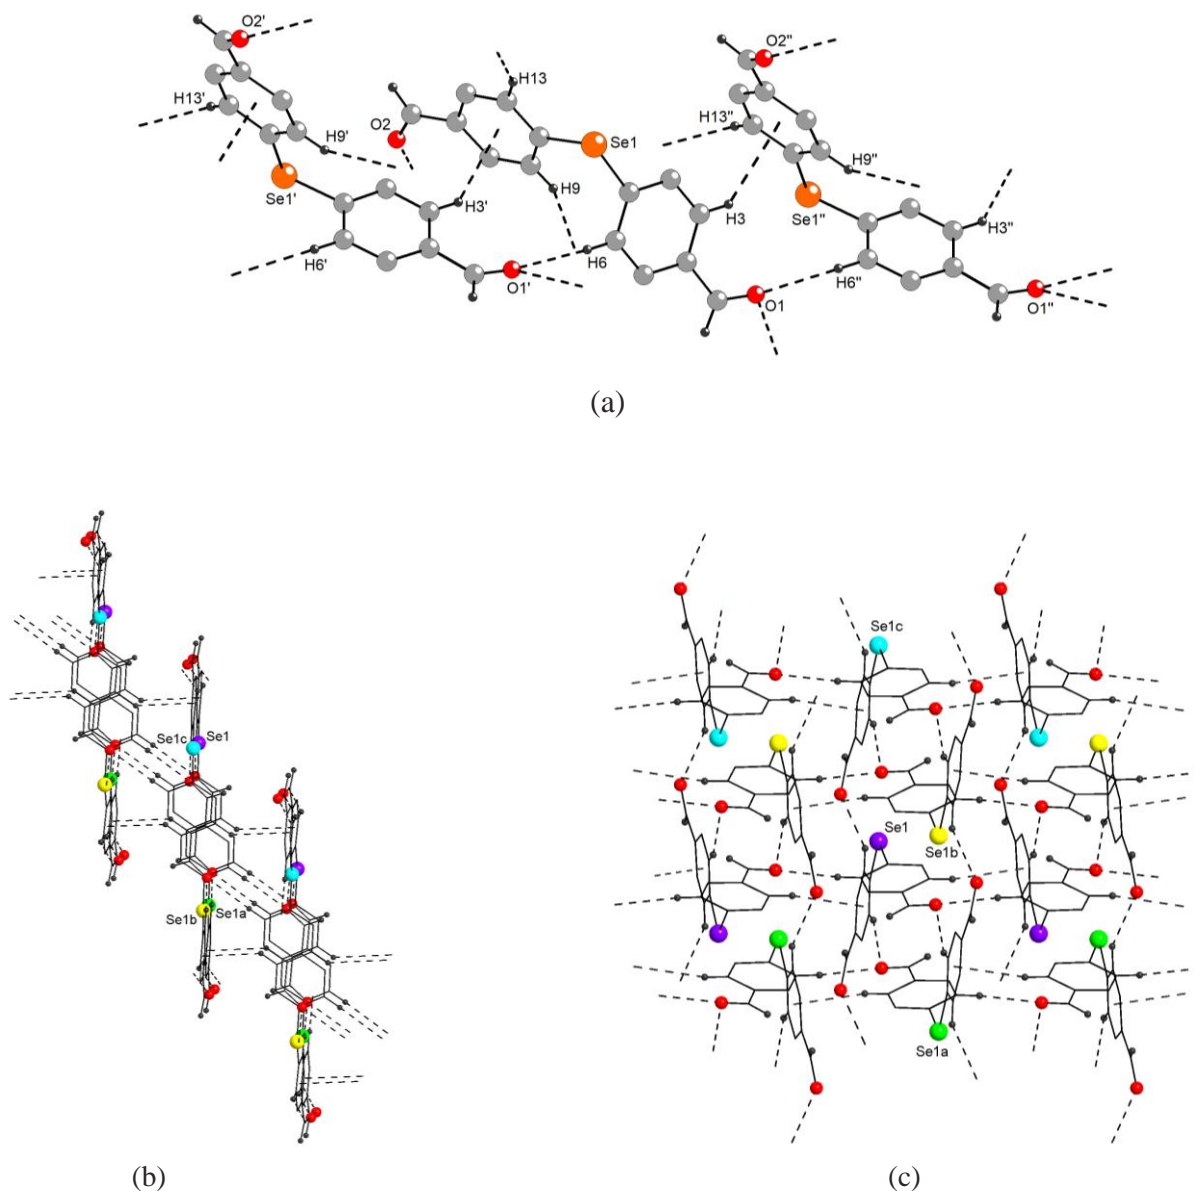

**Figure S7.** (a) View of a chain polymer in the crystal of **4** showing the interactions with the other neighbouring parallel chains (only hydrogen atoms involved in intermolecular interactions are shown); (b) view along axis *b*, and (c) view along axis *c* of the supramolecular 3D network build through C–H<sub>aryl</sub>⋯ $\pi$  (Ph<sub>centroid</sub>) and C–H<sub>aryl</sub>⋯O interactions in the crystal of **4**; molecules of the same polymeric chain are indicated by same colour (green, magenta, yellow and cyan, respectively) for the corresponding selenium atoms [symmetry equivalent atoms (1-*x*, 1-*y*, 1-*z*), (1-*x*, 2-*y*, 1-*z*) and (*x*, 1+*y*, *z*) are given by "a" (green), "b" (yellow), and "c" (cyan), respectively].

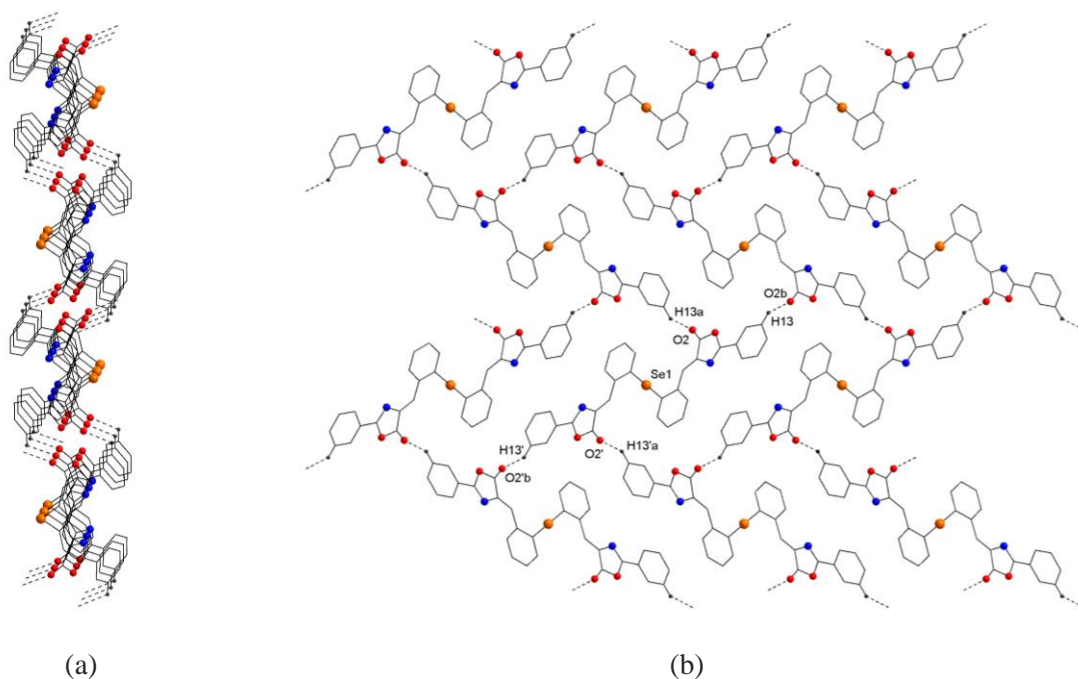

**Figure S8.** (a) View along axis *a*, and (b) view along axis *c* of the supramolecular 2D network build through C–H<sub>aryl</sub>···O interactions in the crystal of **5** [symmetry equivalent atoms ( $-x, 1-y, z$ ), ( $-1/2+x, 3/2-y, 1-z$ ), ( $1/2+x, 3/2-y, 1-z$ ), ( $1/2-x, -1/2+y, 1-z$ ) and ( $-1/2-x, -1/2+y, 1-z$ ) are given by “prime”, “a”, “b”, “prime a” and “prime b”, respectively]

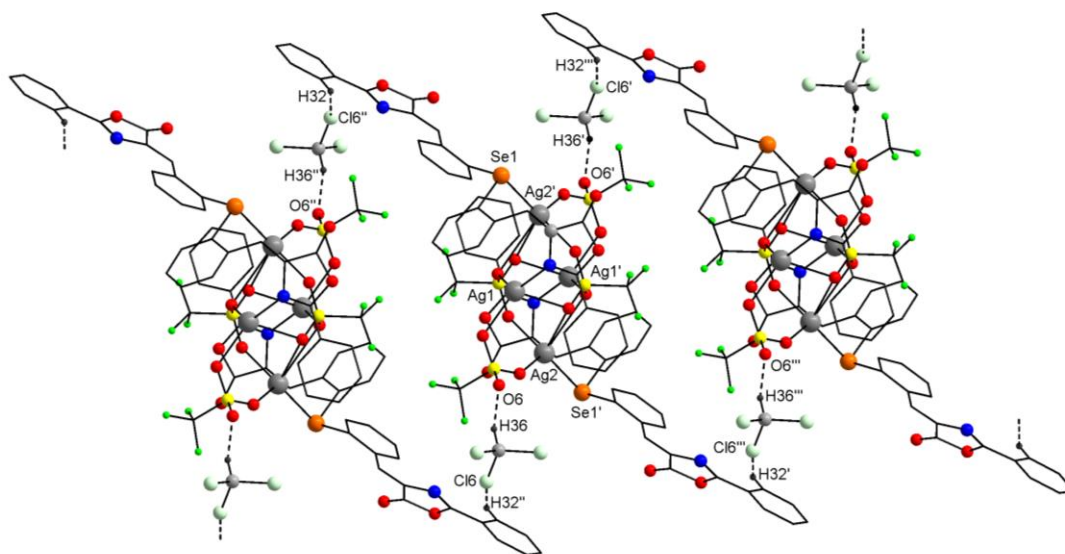

**Figure S9.** Polymeric chain association in the crystal of **9** (only hydrogen atoms involved in intermolecular interactions are shown). Symmetry equivalent atoms ( $2-x, 1-y, 1-z$ ), ( $1-x, 1-y, 1-z$ ), and ( $1+x, y, z$ ) are given by “prime”, “double prime”, and “triple prime”, respectively.

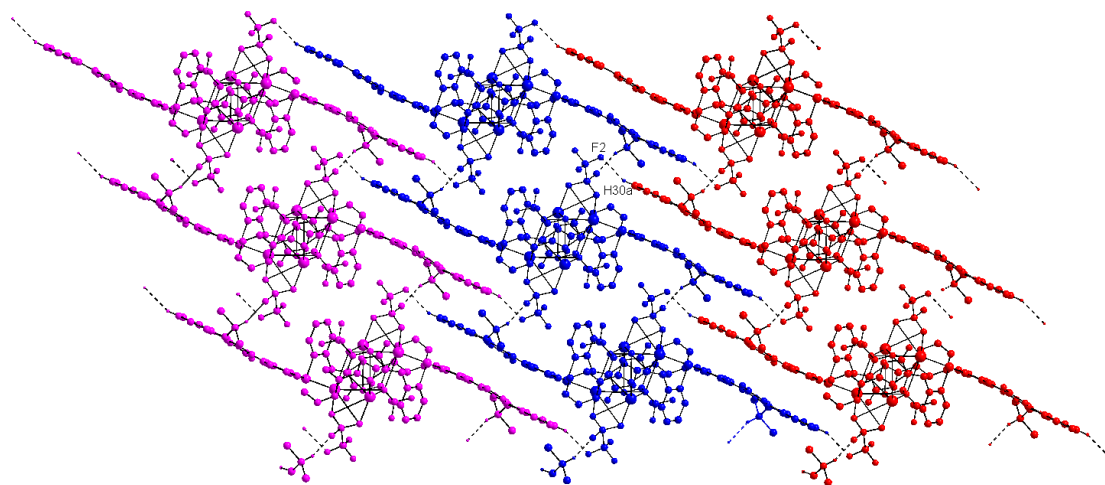

**Figure S10.** View of the supramolecular 2D network build through H $\cdots$ F interactions in the crystal of **9** (only hydrogen atoms involved in intermolecular interactions are shown). Symmetry equivalent atoms (1+x, y, -1+z) are given by “a”. F2 $\cdots$ H30a 2.63 Å.



# Molecules

**Table S1.** Crystal data and details of data collection for **4**, **5** and **9**.

| Compound                                    | <b>4</b>                                          | <b>5</b>                                                         | <b>9</b>                                                                                                       |
|---------------------------------------------|---------------------------------------------------|------------------------------------------------------------------|----------------------------------------------------------------------------------------------------------------|
| Empirical formula                           | C <sub>14</sub> H <sub>10</sub> O <sub>2</sub> Se | C <sub>32</sub> H <sub>20</sub> N <sub>2</sub> O <sub>4</sub> Se | C <sub>76</sub> H <sub>48</sub> Ag <sub>4</sub> F <sub>12</sub> N <sub>4</sub> O <sub>20</sub> Se <sub>2</sub> |
| Formula weight                              | 289.18                                            | 575.46                                                           | 3133.62                                                                                                        |
| <i>T</i> [K]                                | 100.(2)                                           | 100.(2)                                                          | 100.(2)                                                                                                        |
| Crystal system                              | monoclinic                                        | orthorhombic                                                     | triclinic                                                                                                      |
| Space group                                 | P21/n                                             | P 21 21 2                                                        | P-1                                                                                                            |
| <i>a</i> [Å]                                | 12.2490(4)                                        | 13.7518(6)                                                       | 11.2955(13)                                                                                                    |
| <i>b</i> [Å]                                | 7.5386(3)                                         | 19.5095(10)                                                      | 13.2811(15)                                                                                                    |
| <i>c</i> [Å]                                | 12.9332(5)                                        | 4.7253(3)                                                        | 17.903(2)                                                                                                      |
| $\alpha$ [°]                                | 90                                                | 90                                                               | 84.806(3)                                                                                                      |
| $\beta$ [°]                                 | 102.5630(10)                                      | 90                                                               | 81.693(3)                                                                                                      |
| $\gamma$ [°]                                | 90                                                | 90                                                               | 88.358(4)                                                                                                      |
| <i>V</i> [Å <sup>3</sup> ]                  | 1165.66(8)                                        | 1267.75(12)                                                      | 2646.3(5)                                                                                                      |
| <i>Z</i>                                    | 4                                                 | 2                                                                | 1                                                                                                              |
| $\rho_{\text{calcd}}$ [g cm <sup>-3</sup> ] | 1.648                                             | 1.508                                                            | 1.966                                                                                                          |
| Absorption coefficient [mm <sup>-1</sup> ]  | 3.206                                             | 1.524                                                            | 2.188                                                                                                          |
| Crystal size [mm]                           | 0.128x0.115x0.059                                 | 0.131x0.087x0.045                                                | 0.081x0.064x 0.023                                                                                             |
| $\Theta$ range for data collection          | 2.08 to 28.30                                     | 2.088 to 28.306                                                  | 2.0 to 25.0                                                                                                    |
| Reflections collected                       | 33053                                             | 37153                                                            | 106466                                                                                                         |
| Independent reflections                     | 2888                                              | 3165                                                             | 9332                                                                                                           |
|                                             | [R(int) = 0.0470]                                 | [R(int) = 0.0723]                                                | [R(int) = 0.1210]                                                                                              |
| Data/restraints/parameters                  | 2888/0/154                                        | 3165/0/178                                                       | 9332/0/658                                                                                                     |
| Final R indices [I>2sigma(I)]               | R1 = 0.0286                                       | R1 = 0.0325                                                      | R1 = 0.0669                                                                                                    |
|                                             | wR2 = 0.0663                                      | wR2 = 0.0558                                                     | wR2 = 0.1609                                                                                                   |
| R indices (all data)                        | R1 = 0.0379                                       | R1 = 0.0451                                                      | R1 = 0.1046                                                                                                    |
|                                             | wR2 = 0.0709                                      | wR2 = 0.0598                                                     | wR2 = 0.1764                                                                                                   |
| Goodness-of-fit on F <sup>2</sup>           | 1.044                                             | 1.043                                                            | 1.036                                                                                                          |
| Largest diff. peak/hole / e Å <sup>-3</sup> | 0.869 / -0.500                                    | 0.256 / -0.502                                                   | 2.605 / -1.647                                                                                                 |

# Molecules

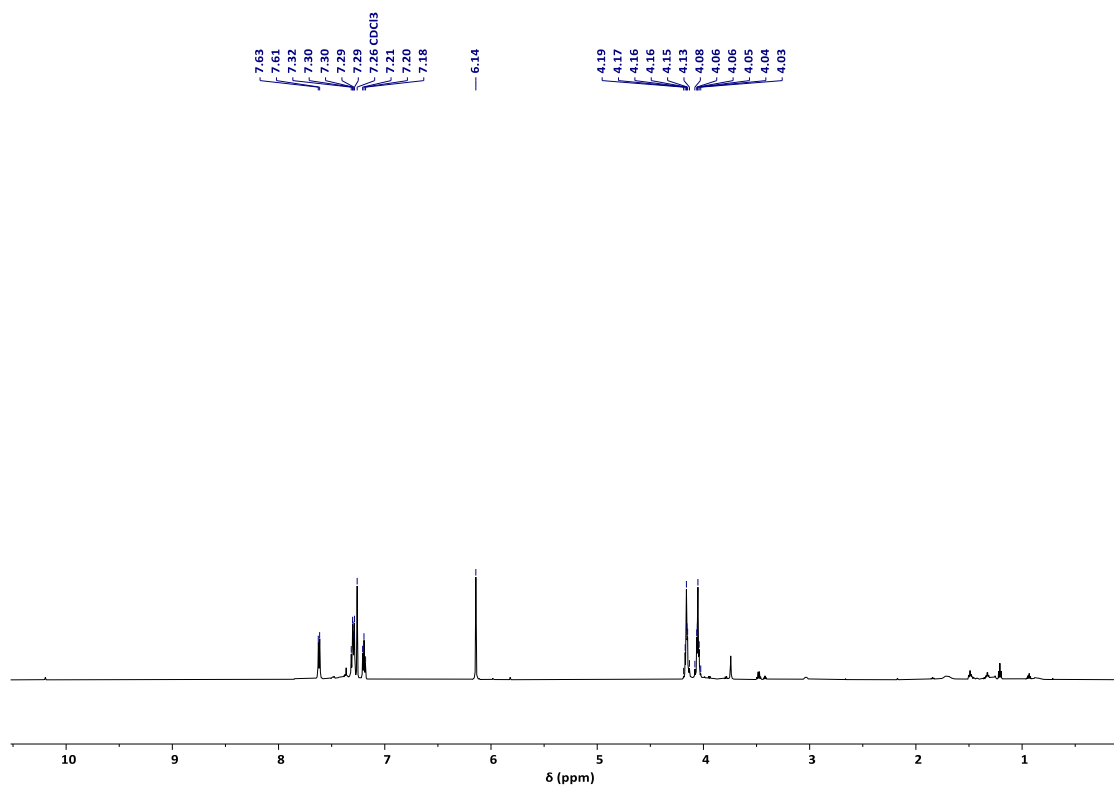

**Figure S11.** <sup>1</sup>H NMR spectrum (CDCl<sub>3</sub>, 600 MHz) of **1**.

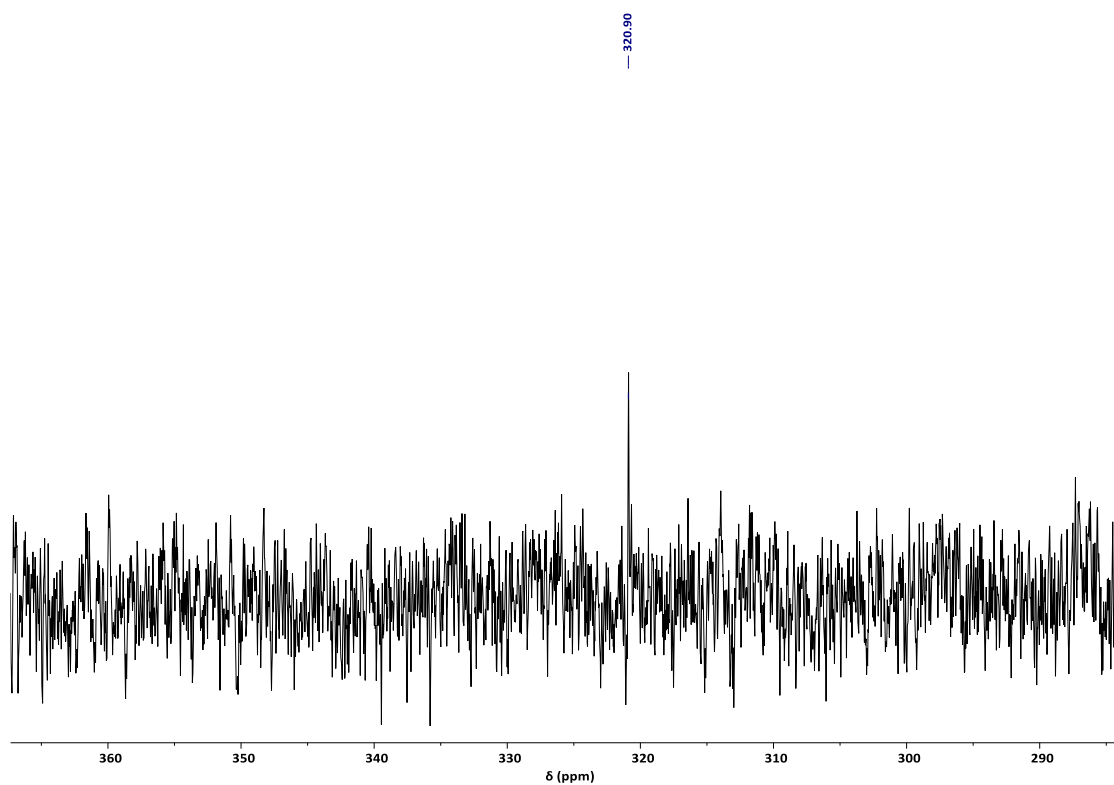

**Figure S12.** <sup>77</sup>Se NMR spectrum (CDCl<sub>3</sub>, 115 MHz) of **1**.

# Molecules

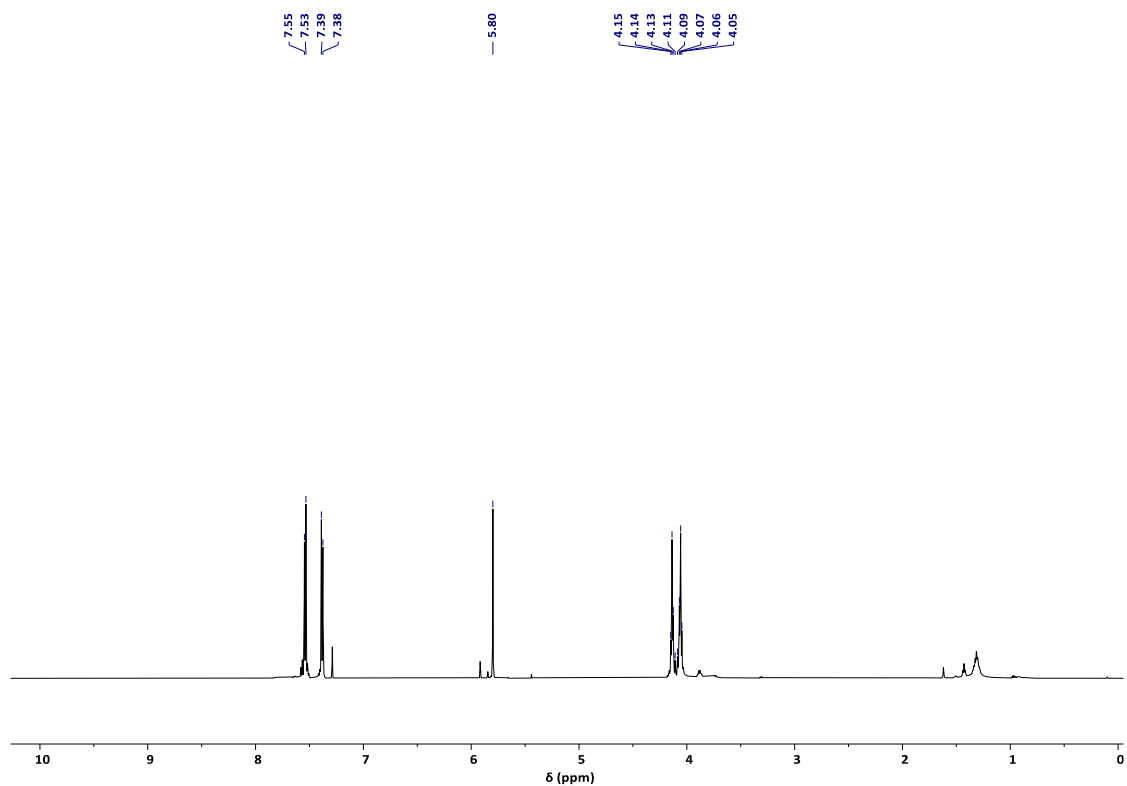

**Figure S13.** <sup>1</sup>H NMR spectrum (CDCl<sub>3</sub>, 600 MHz) of **2**.

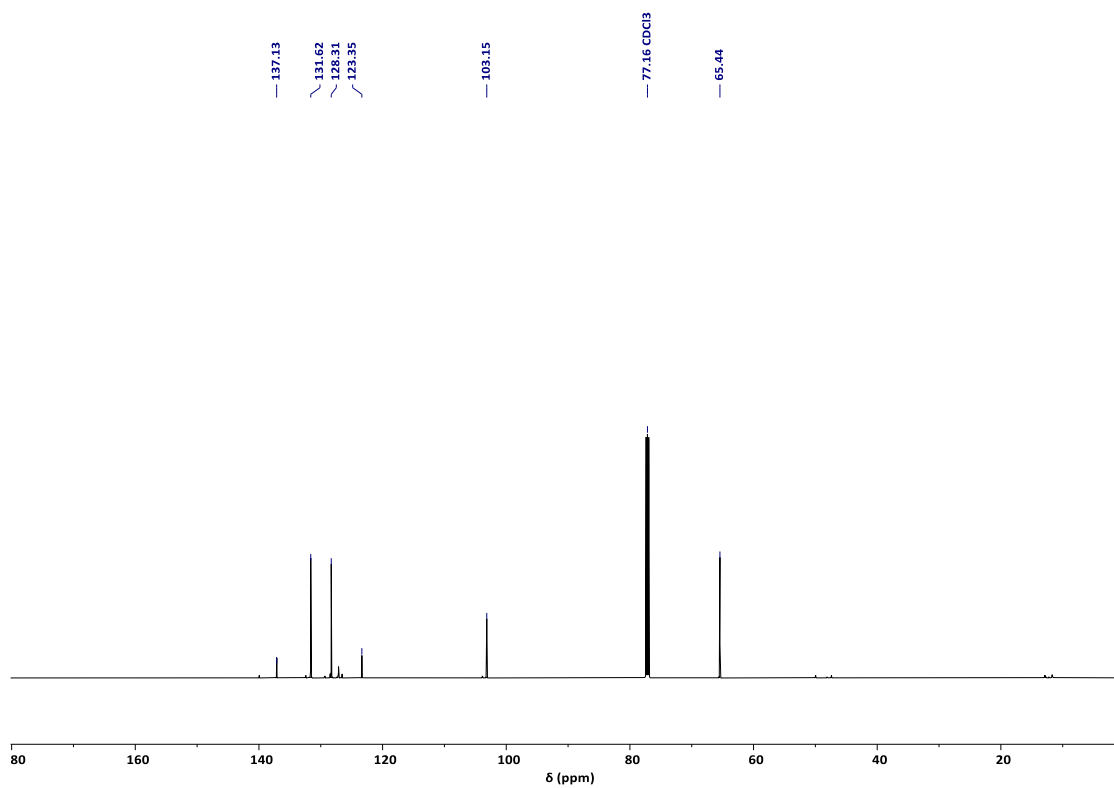

**Figure S14.** <sup>13</sup>C NMR spectrum (CDCl<sub>3</sub>, 151 MHz) of **2**.

# Molecules

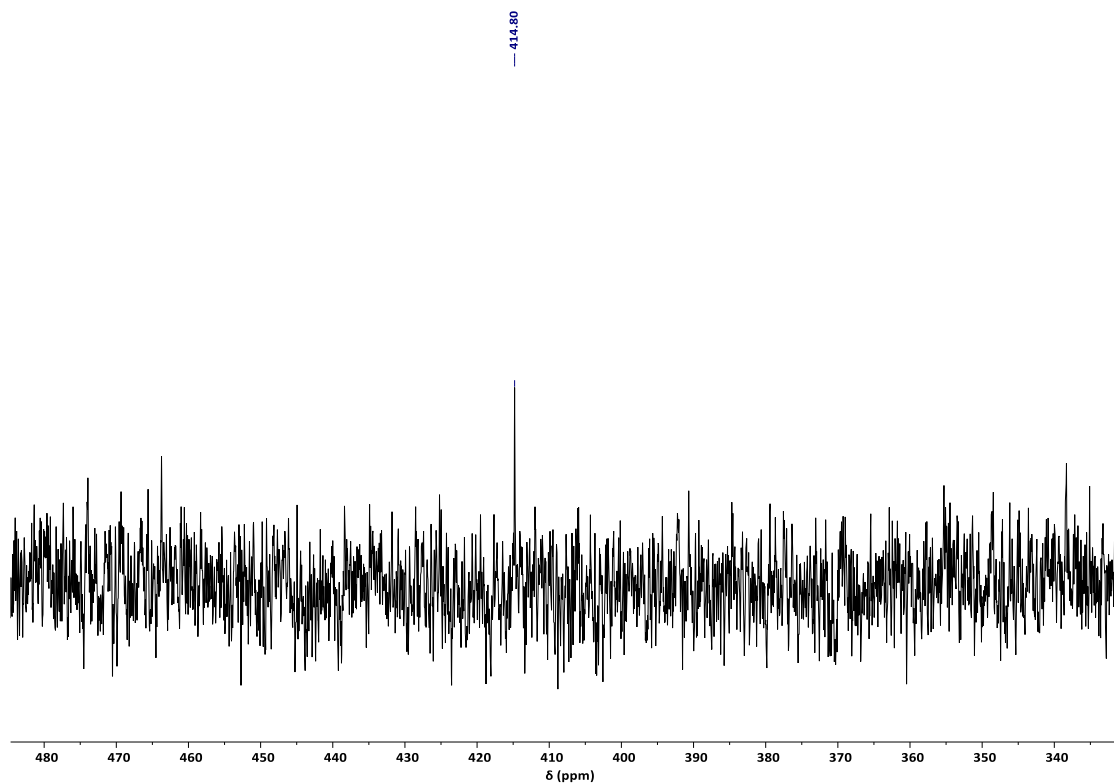

**Figure S15.**  $^{77}\text{Se}$  NMR spectrum ( $\text{CDCl}_3$ , 114 MHz) of **2**.

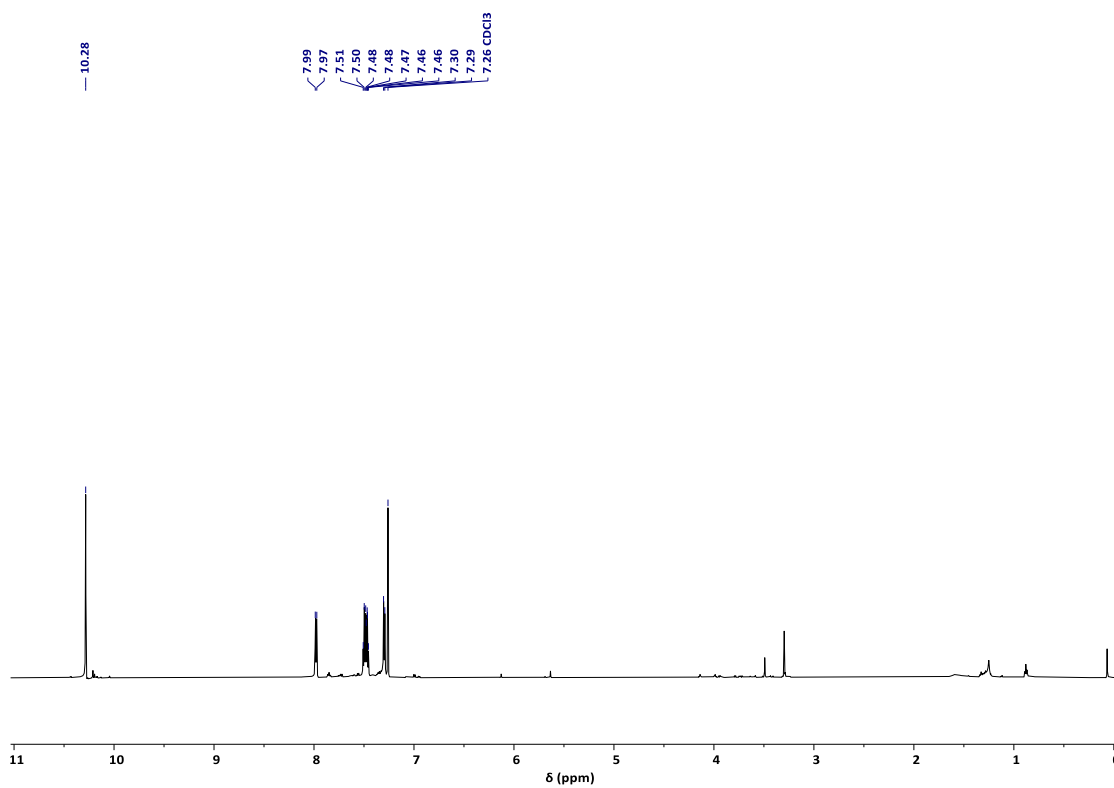

**Figure S16.**  $^1\text{H}$  NMR spectrum ( $\text{CDCl}_3$ , 600 MHz) of **3**.

# Molecules

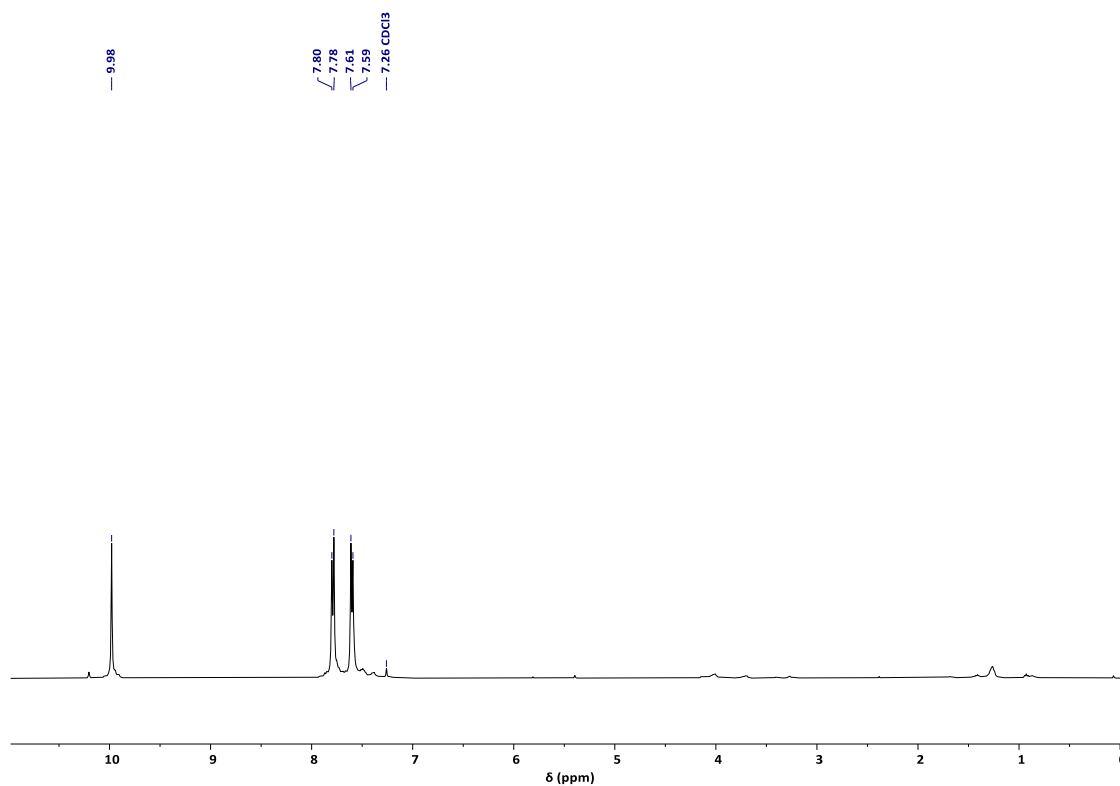

**Figure S17.** <sup>1</sup>H NMR spectrum (CDCl<sub>3</sub>, 400 MHz) of **4**.

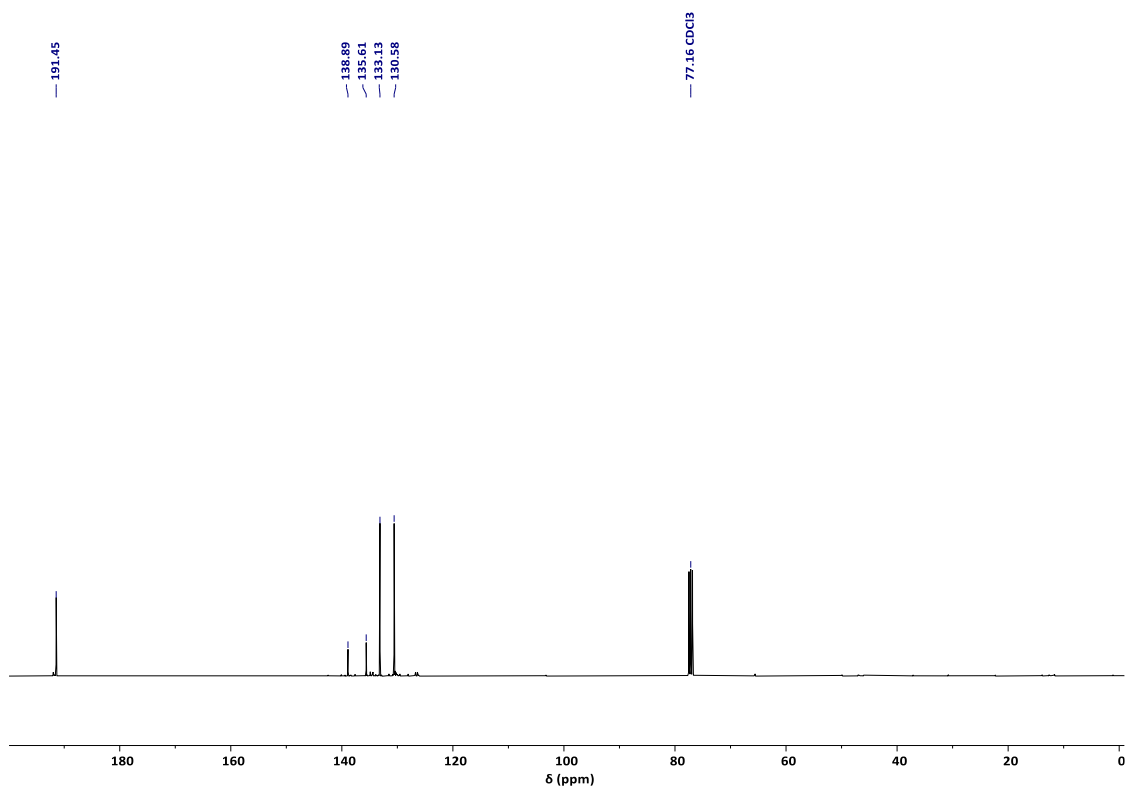

**Figure S18.** <sup>13</sup>C NMR spectrum (CDCl<sub>3</sub>, 101 MHz) of **4**.

# Molecules

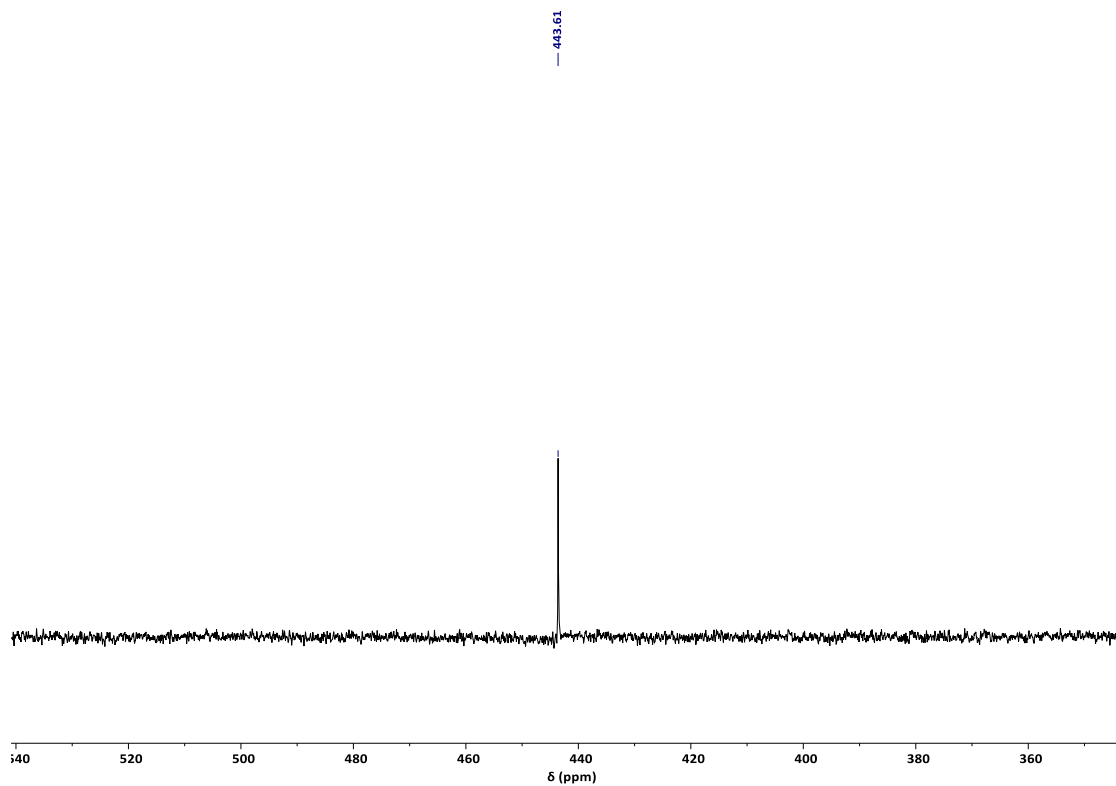

**Figure S19.**  $^{77}\text{Se}$  NMR spectrum (CDCl<sub>3</sub>, 76 MHz) of **4**.

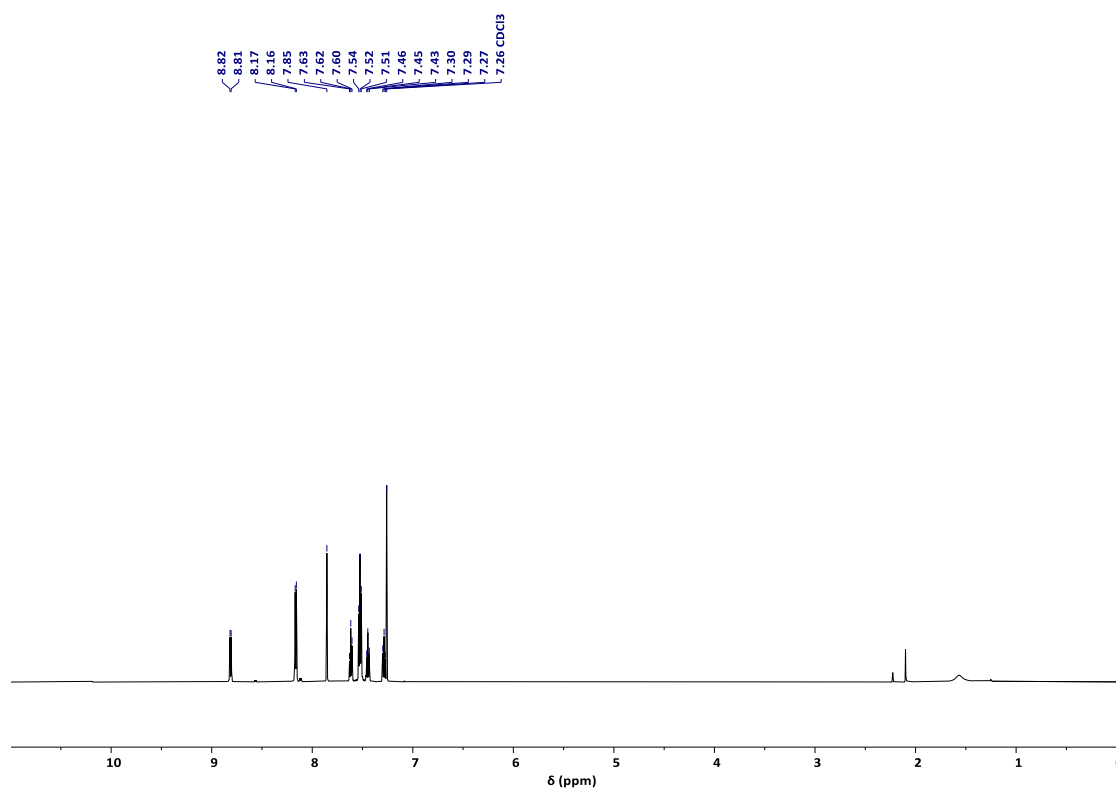

**Figure S20.**  $^1\text{H}$  NMR spectrum (CDCl<sub>3</sub>, 600 MHz) of **5**.

# Molecules

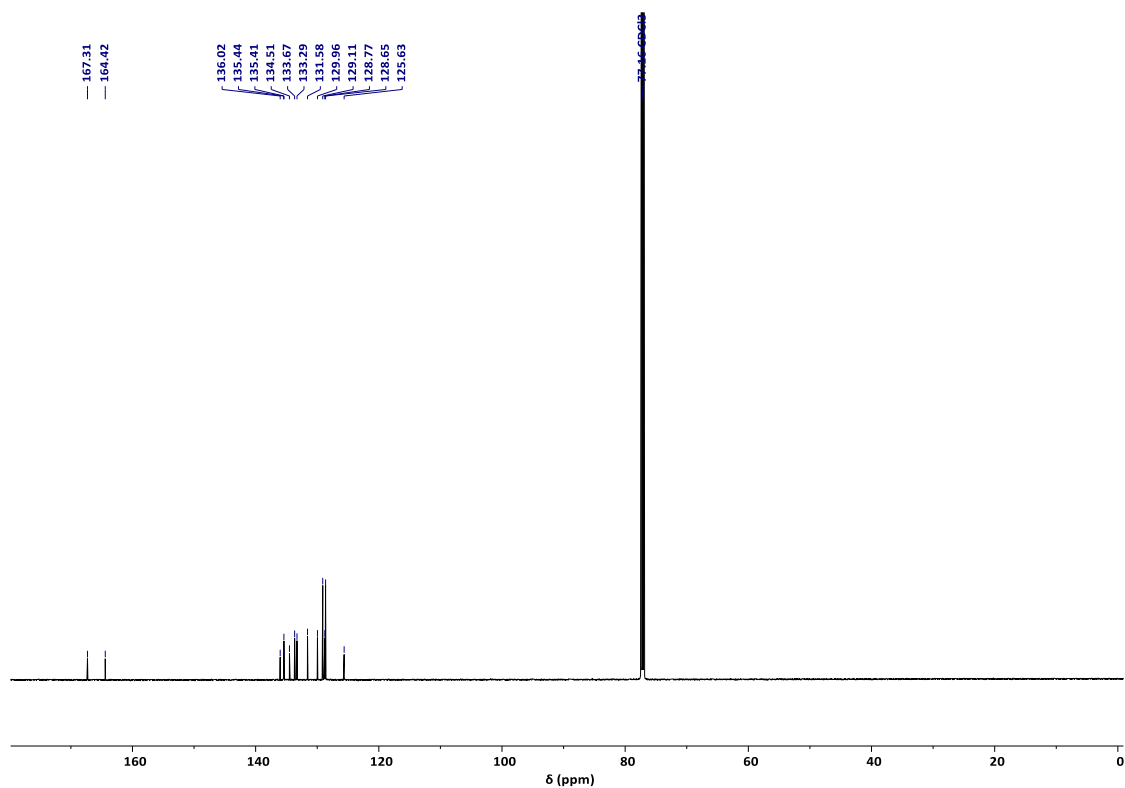

**Figure S21.** <sup>13</sup>C NMR spectrum (CDCl<sub>3</sub>, 151 MHz) of **5**.

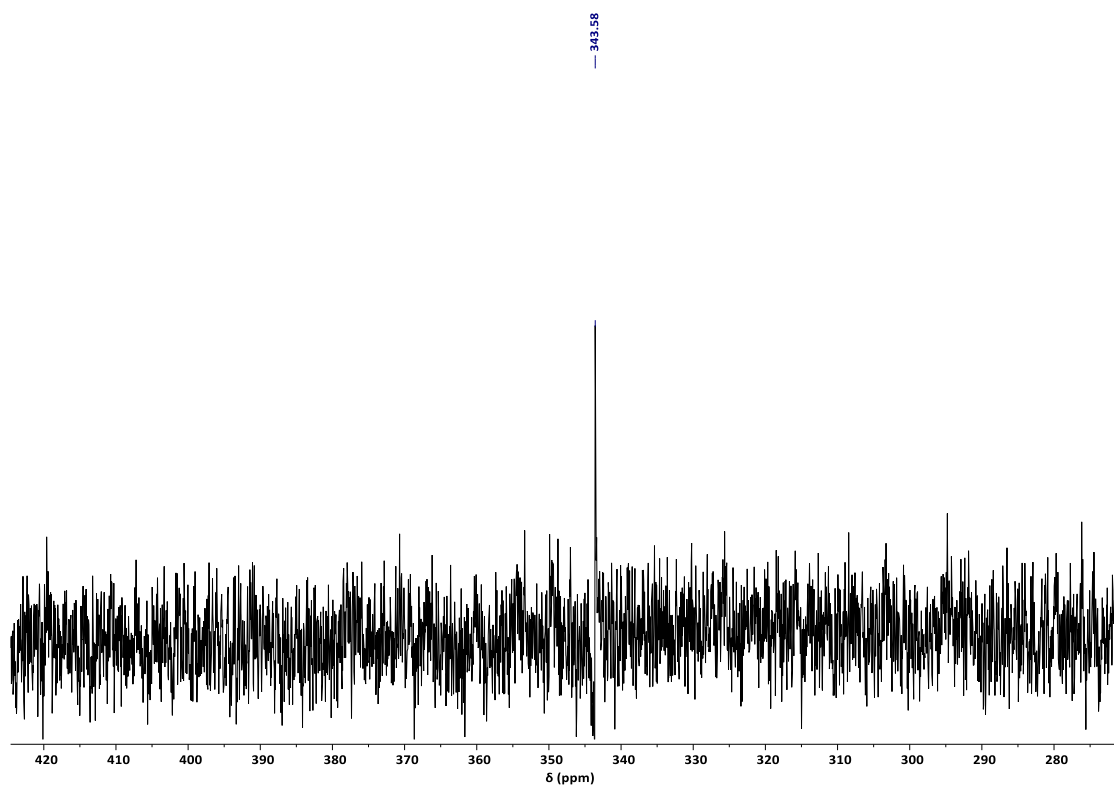

**Figure S22.** <sup>77</sup>Se NMR spectrum (CDCl<sub>3</sub>, 114 MHz) of **5**.

# Molecules

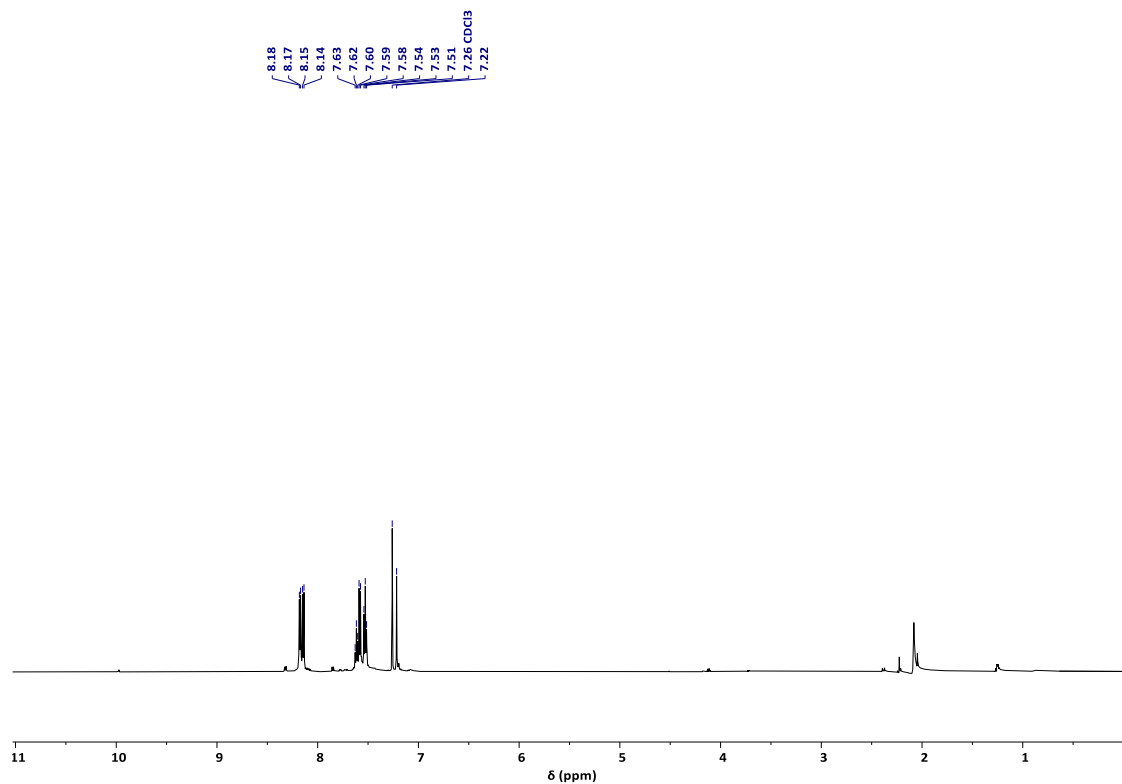

**Figure S23.** <sup>1</sup>H NMR spectrum (CDCl<sub>3</sub>, 400 MHz) of **6**.

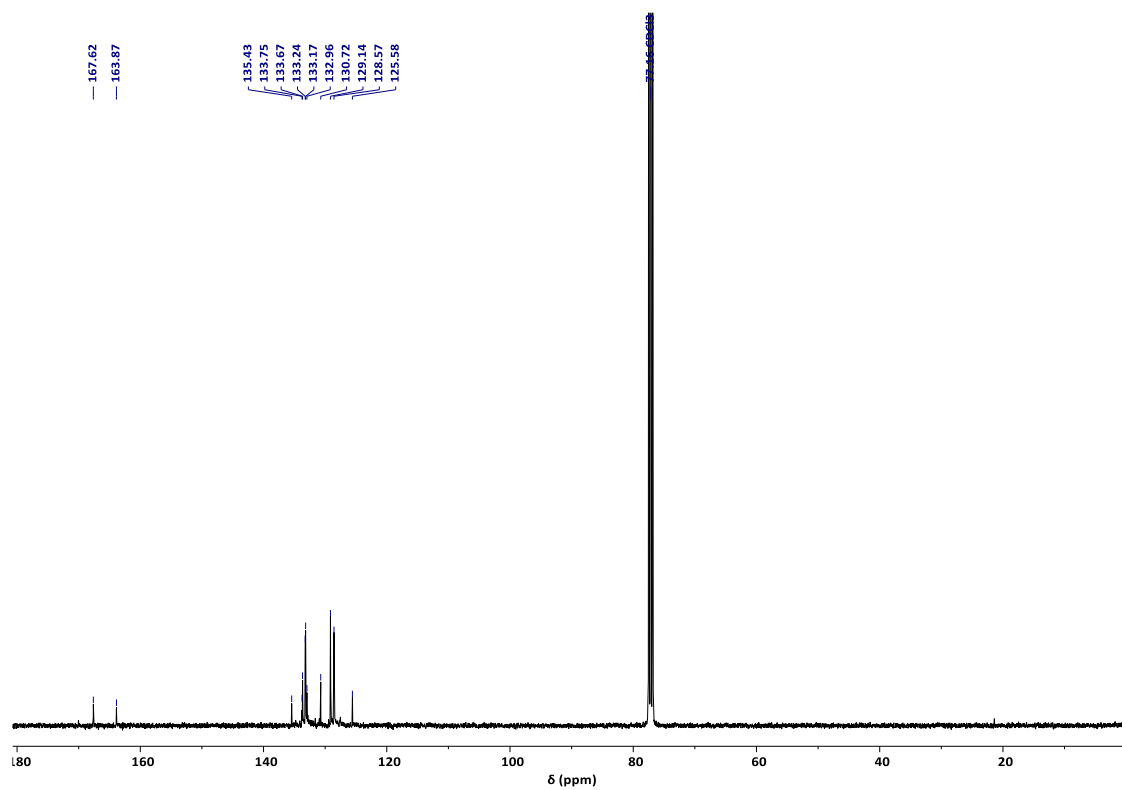

**Figure S24.** <sup>13</sup>C NMR spectrum (CDCl<sub>3</sub>, 101 MHz) of **6**.



# Molecules

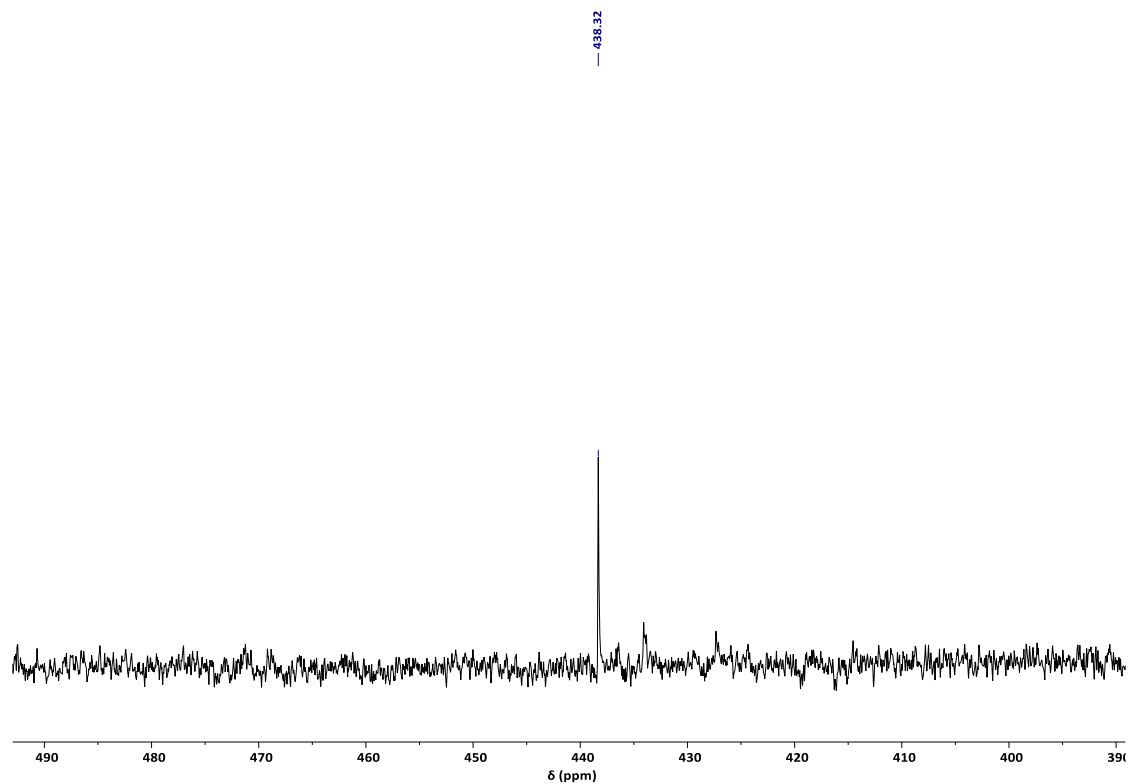

**Figure S25.**  $^{77}\text{Se}$  NMR spectrum ( $\text{CDCl}_3$ , 76 MHz) of **6**.

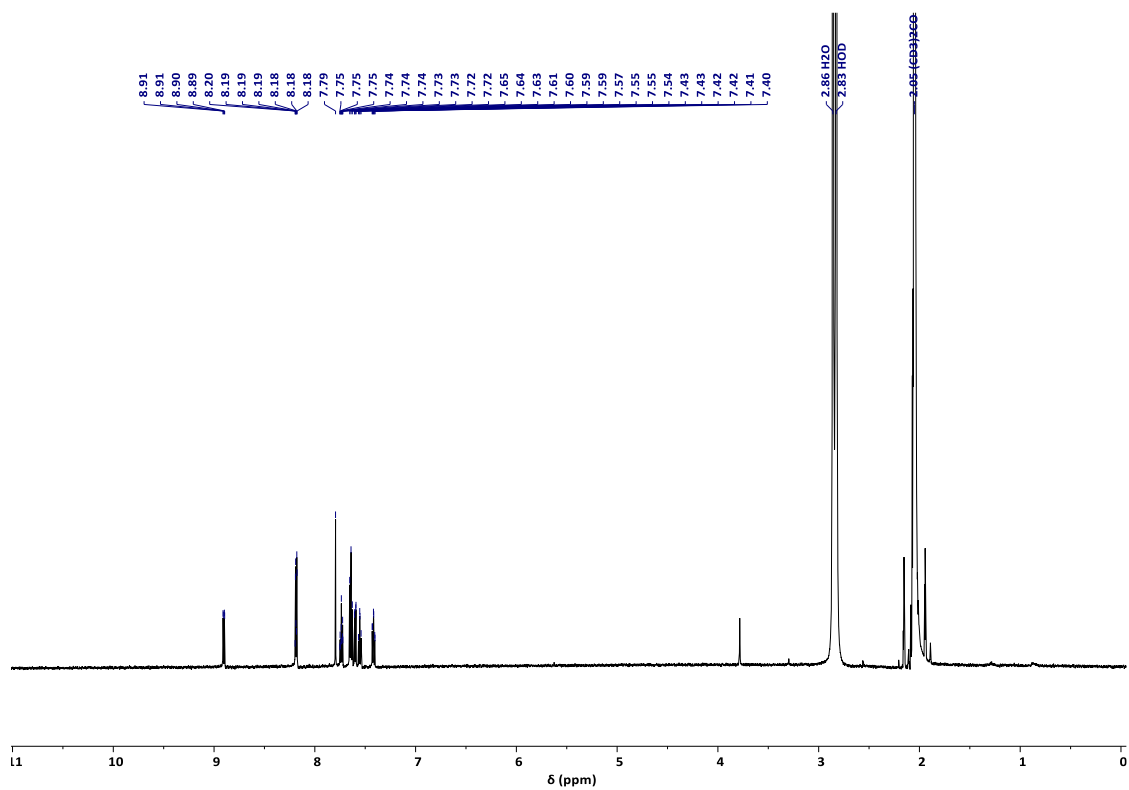

**Figure S26.**  $^1\text{H}$  NMR spectrum ( $\text{acetone-}d_6$ , 600 MHz) of **7**.

# Molecules

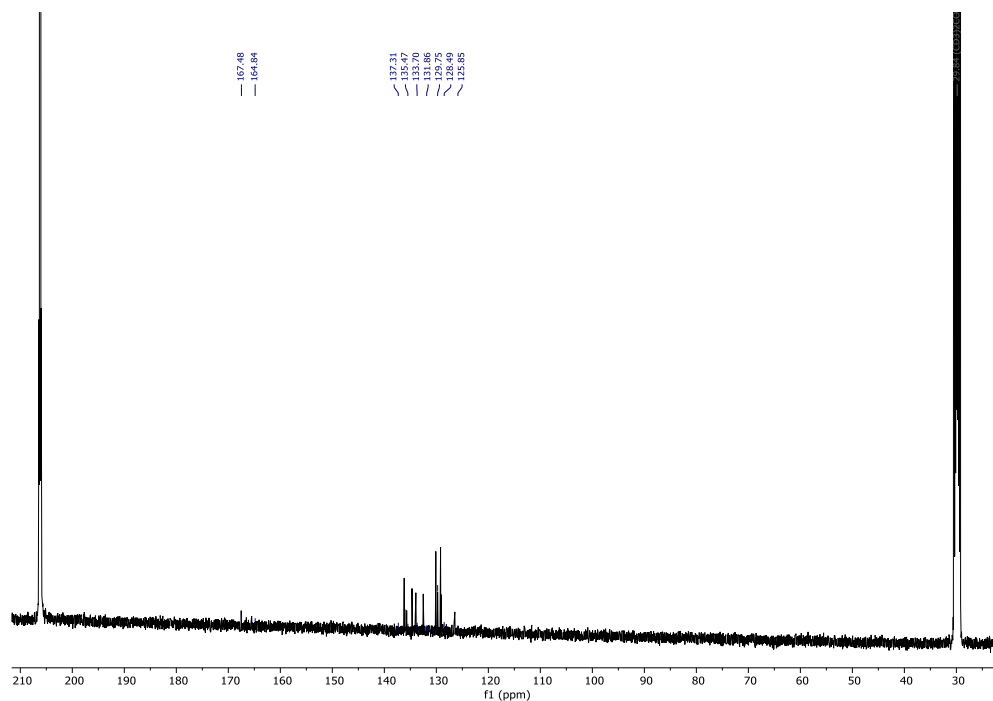

**Figure S27.**  $^{13}\text{C}$  NMR spectrum (acetone- $d_6$ , 151 MHz) of **7**.

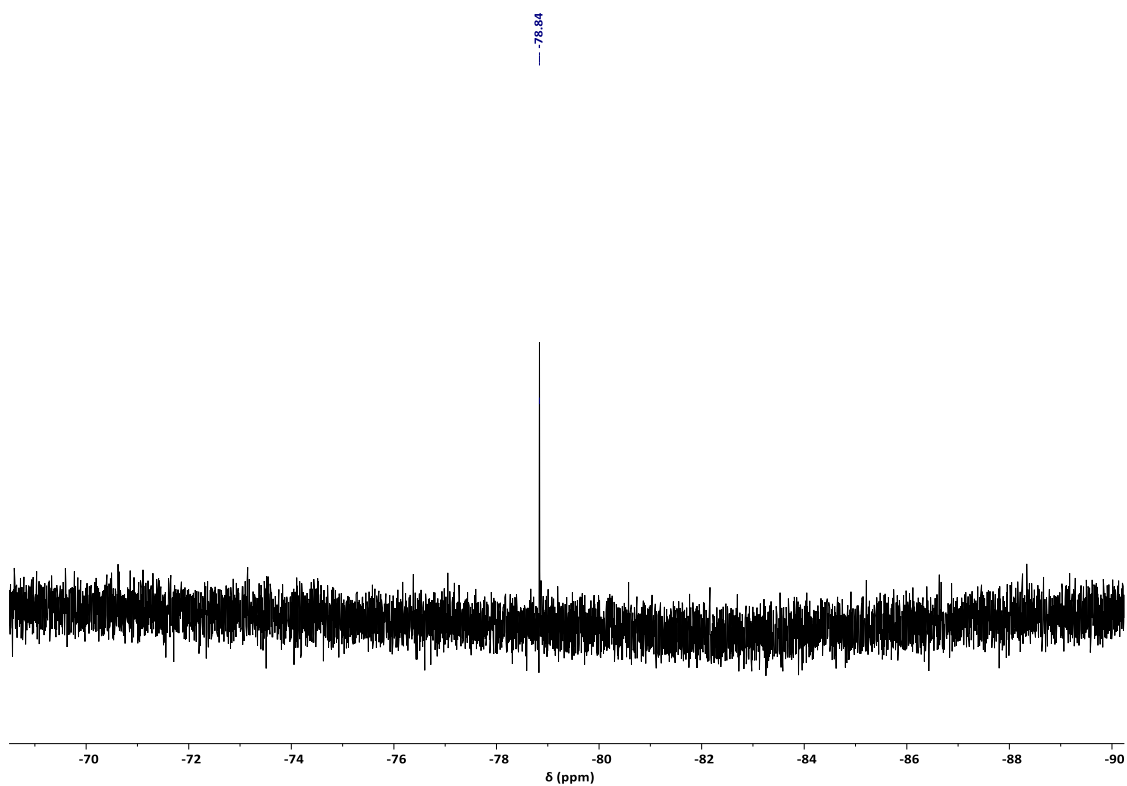

**Figure S28.**  $^{19}\text{F}$  NMR spectrum (acetone- $d_6$ , 565 MHz) of **7**.

# Molecules

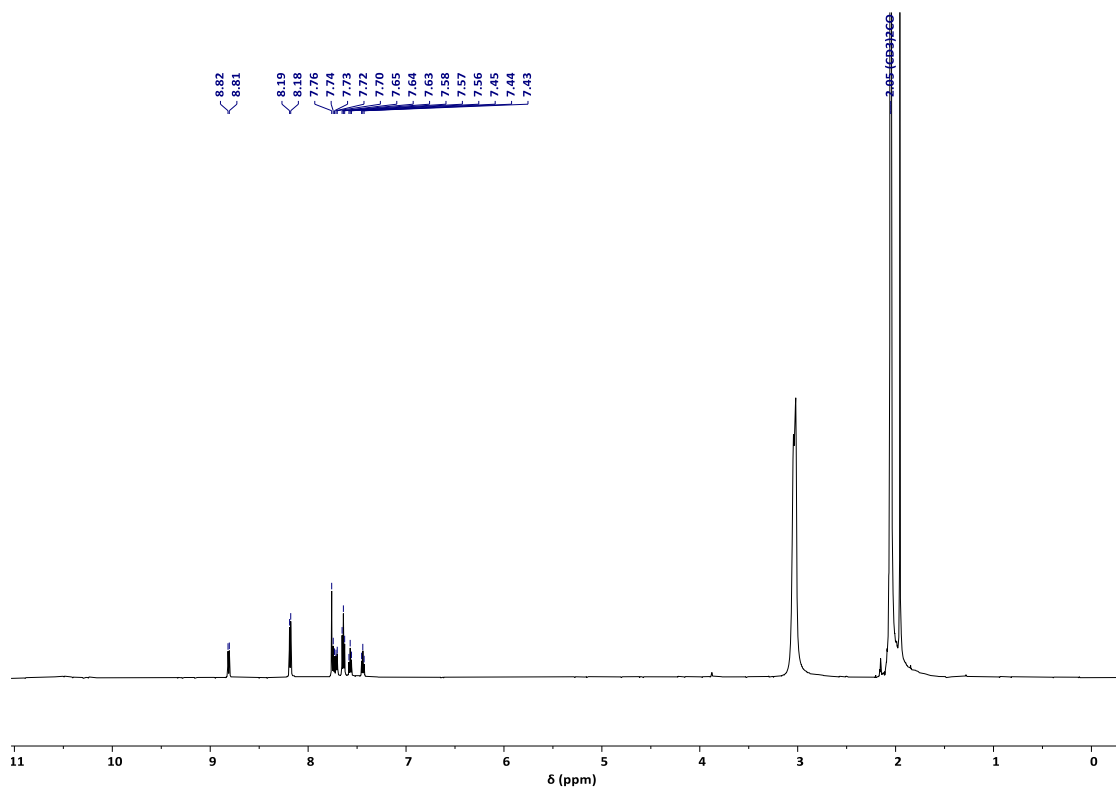

**Figure S29.** <sup>1</sup>H NMR spectrum (acetone-*d*<sub>6</sub>, 600 MHz) of **9**.

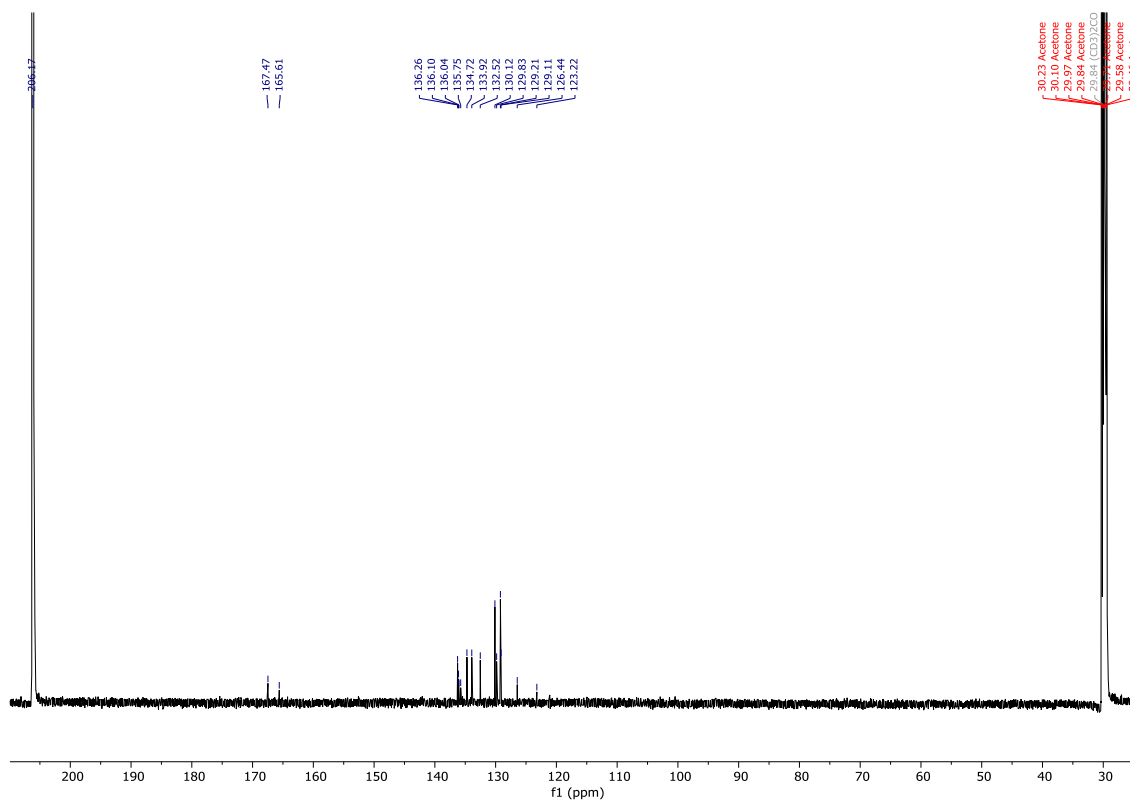

**Figure S30.** <sup>13</sup>C NMR spectrum (acetone-*d*<sub>6</sub>, 151 MHz) of **9**.

# Molecules

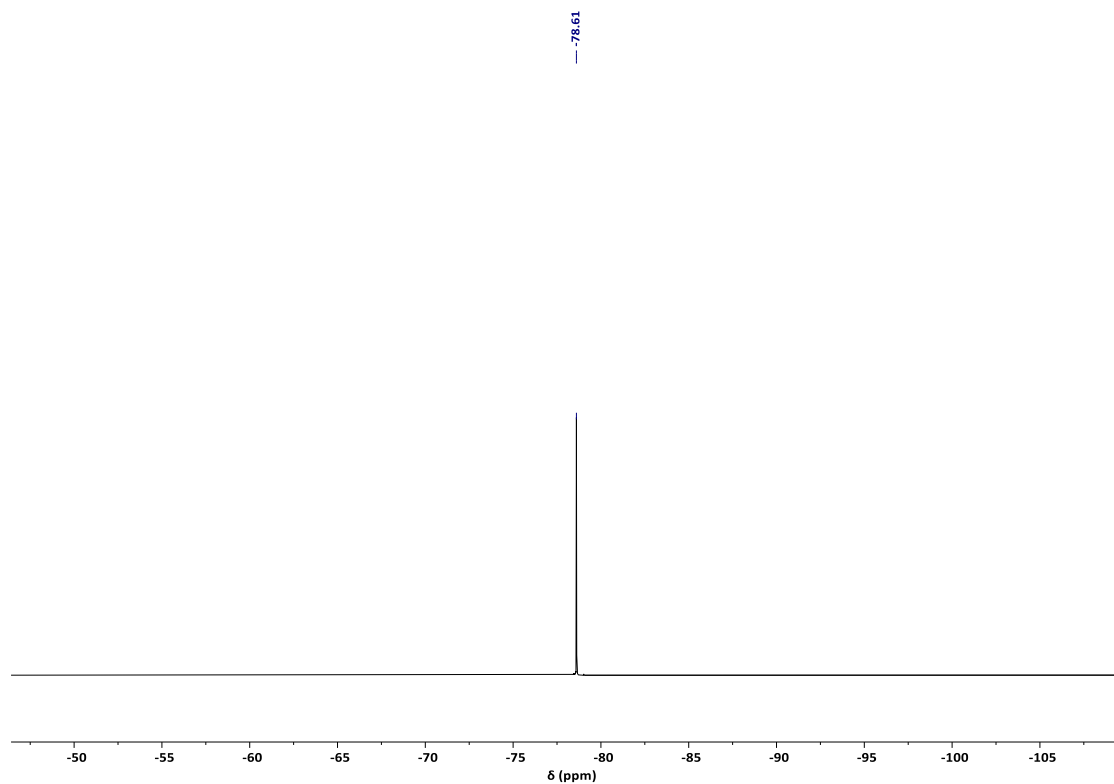

**Figure S31.**  $^{19}\text{F}$  NMR spectrum (acetone- $d_6$ , 565 MHz) of **9**.

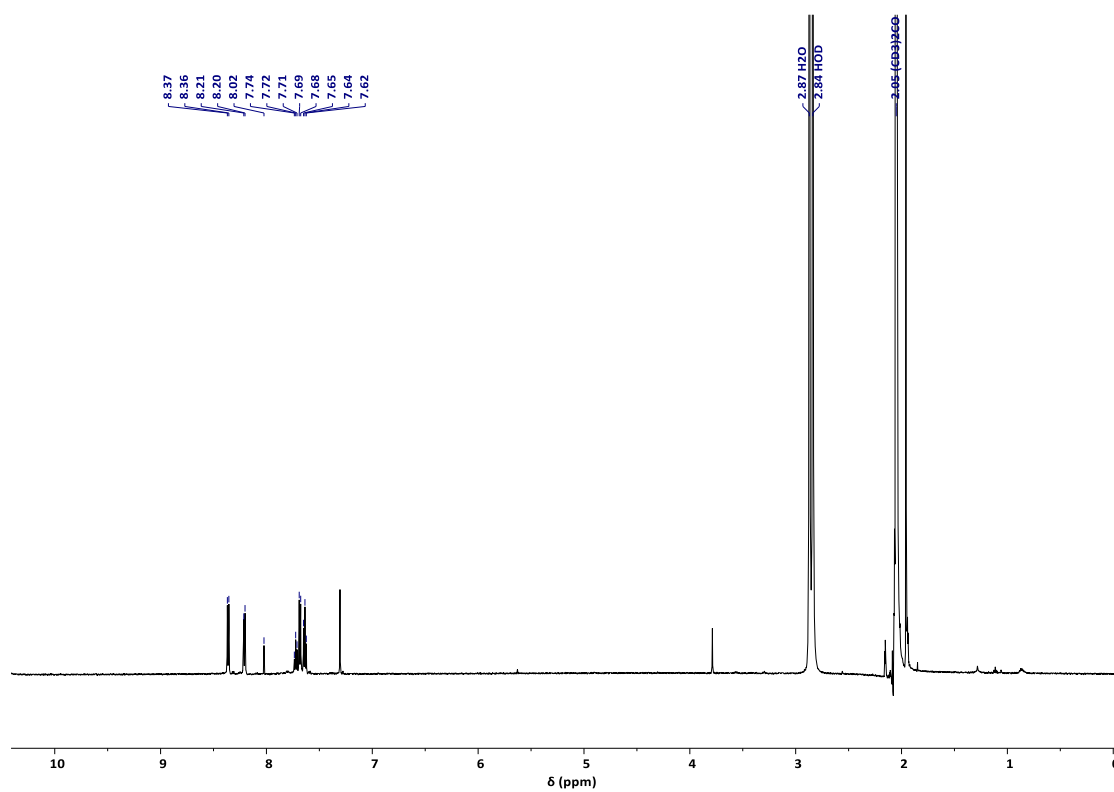

**Figure S32.**  $^1\text{H}$  NMR spectrum (acetone- $d_6$ , 600 MHz) of **8**.

# Molecules

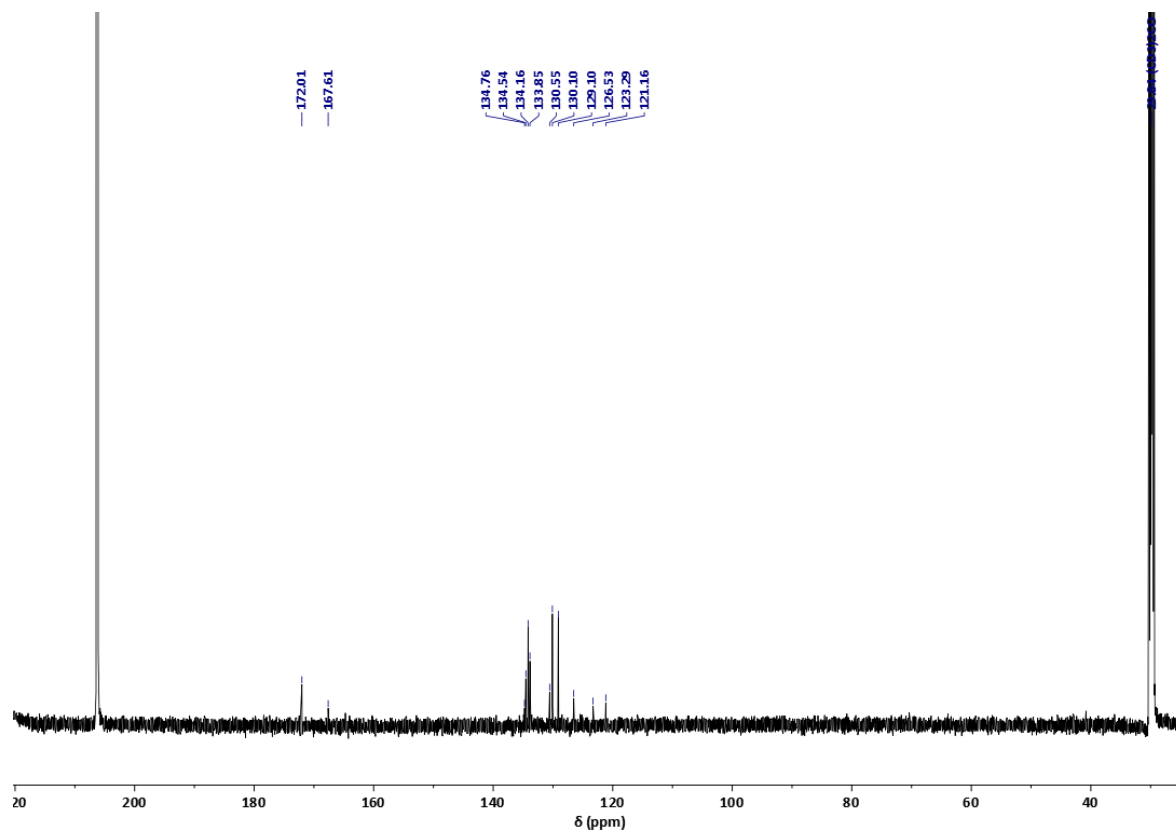

**Figure S33.**  $^{13}\text{C}$  NMR spectrum (acetone- $d_6$ , 151 MHz) of **8**.

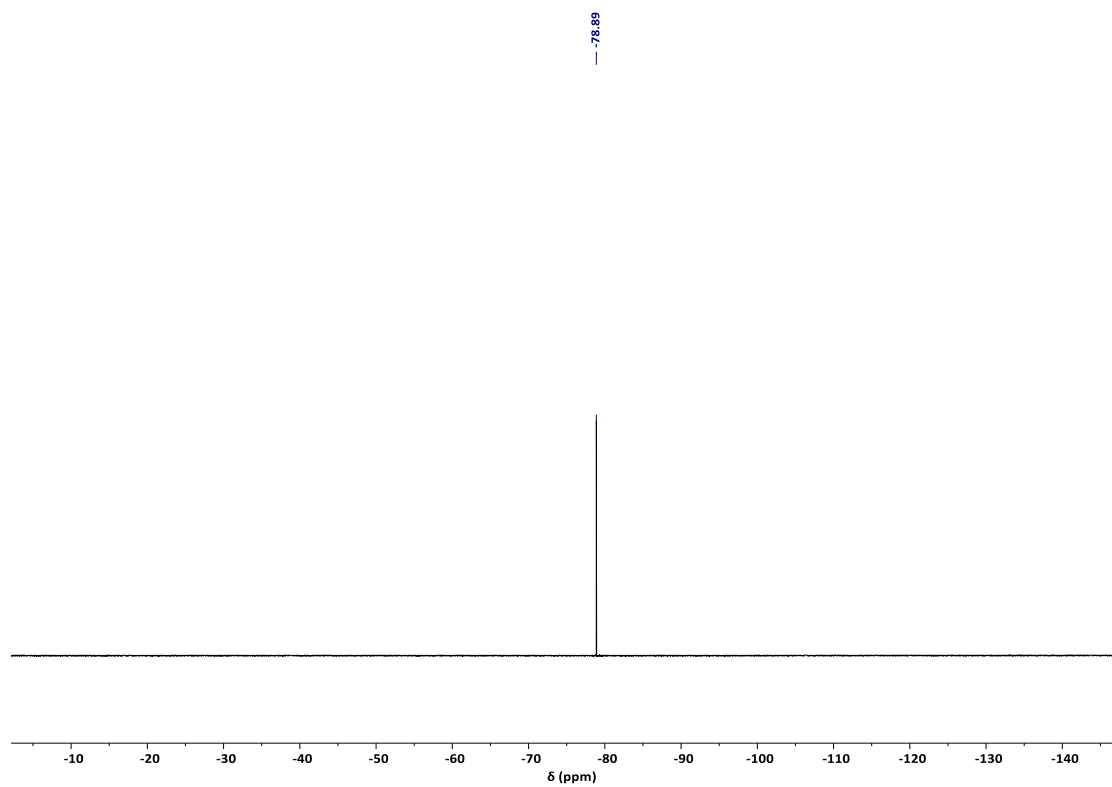

**Figure S34.**  $^{19}\text{F}$  NMR spectrum (acetone- $d_6$ , 565 MHz) of **8**.

# Molecules

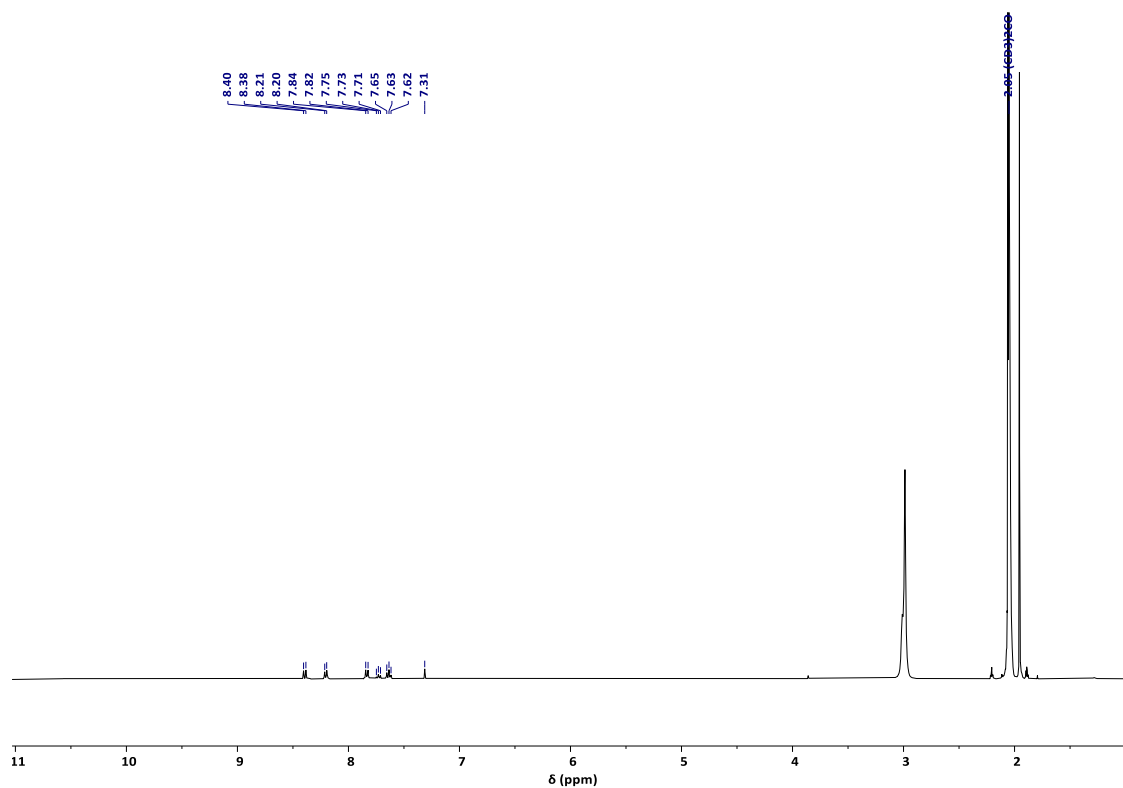

**Figure S35.** <sup>1</sup>H NMR spectrum (acetone-*d*<sub>6</sub>, 400 MHz) of **10**.

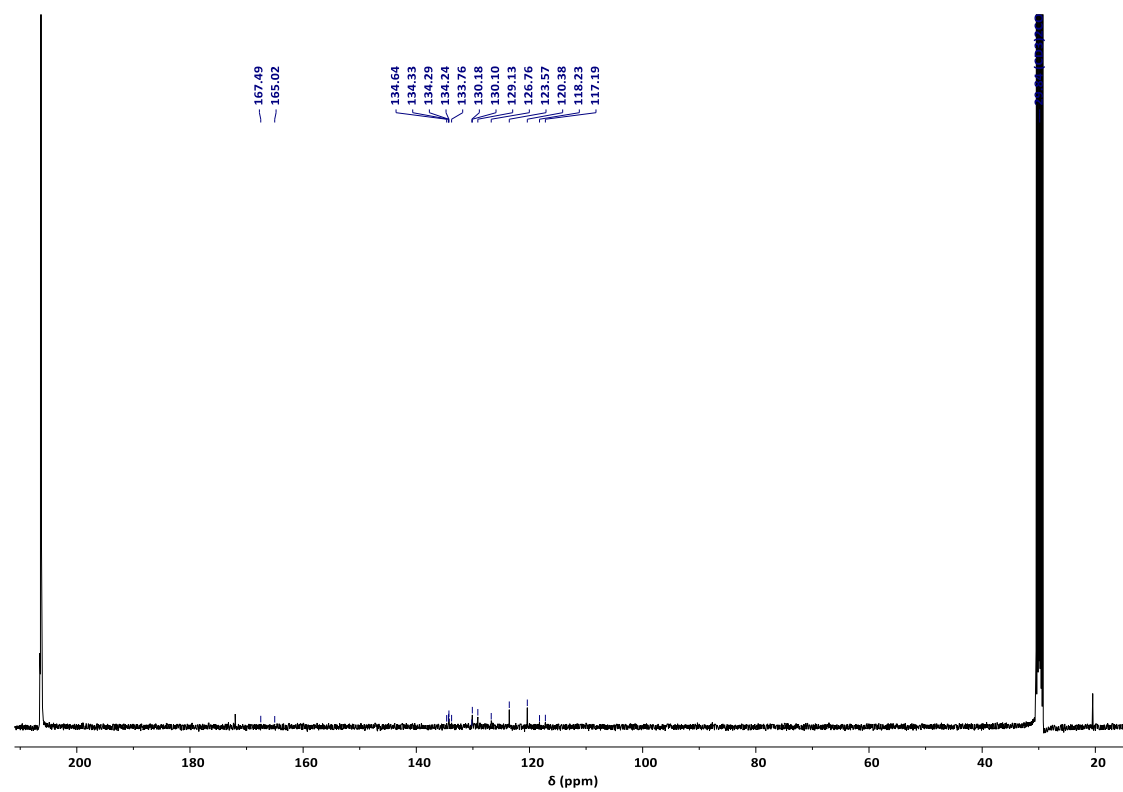

**Figure S36.** <sup>13</sup>C NMR spectrum (acetone-*d*<sub>6</sub>, 101 MHz) of **10**.

# Molecules

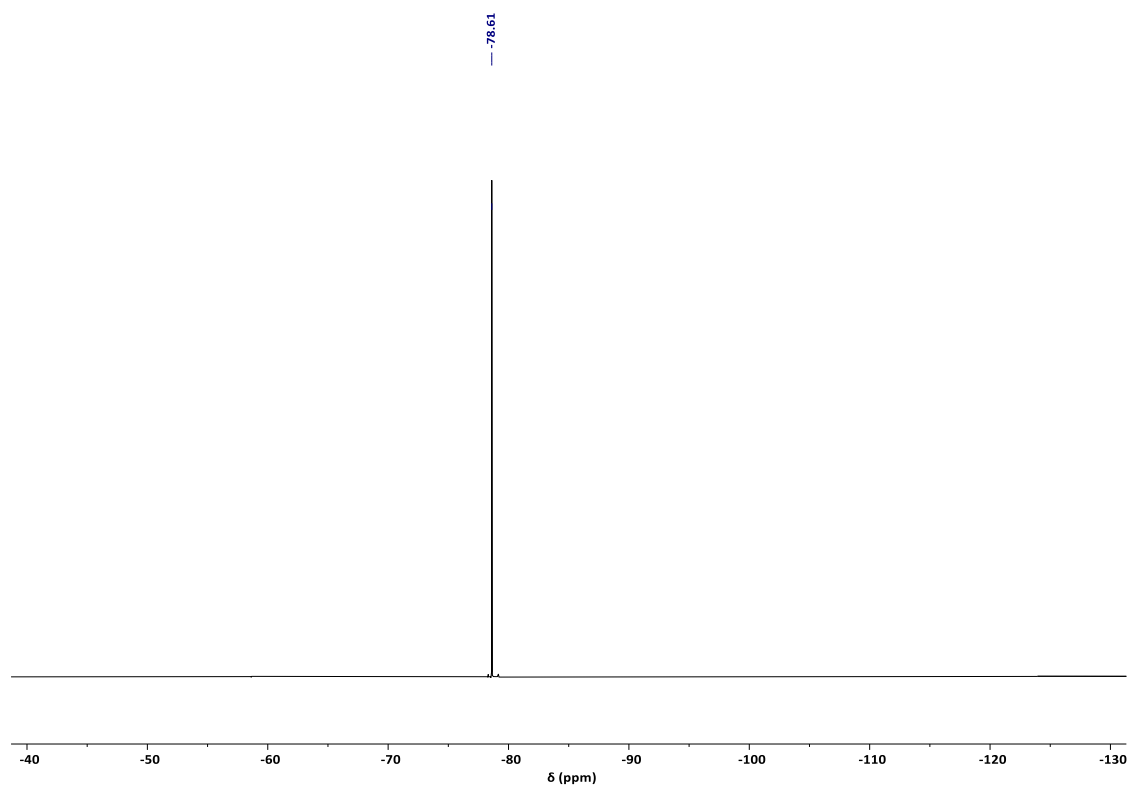

**Figure S37.**  $^{19}\text{F}$  NMR spectrum (acetone- $d_6$ , 376 MHz) of **10**.

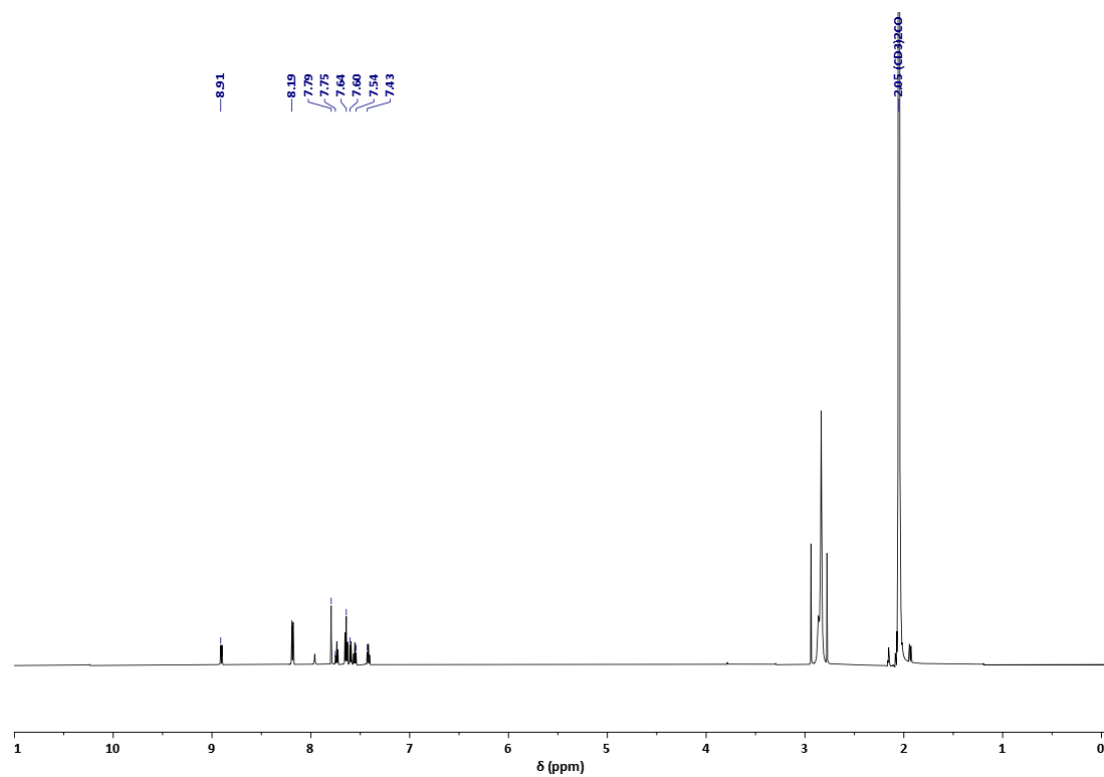

**Figure S38.**  $^1\text{H}$  NMR spectrum (acetone- $d_6$ , 600 MHz) of **11**.

# Molecules

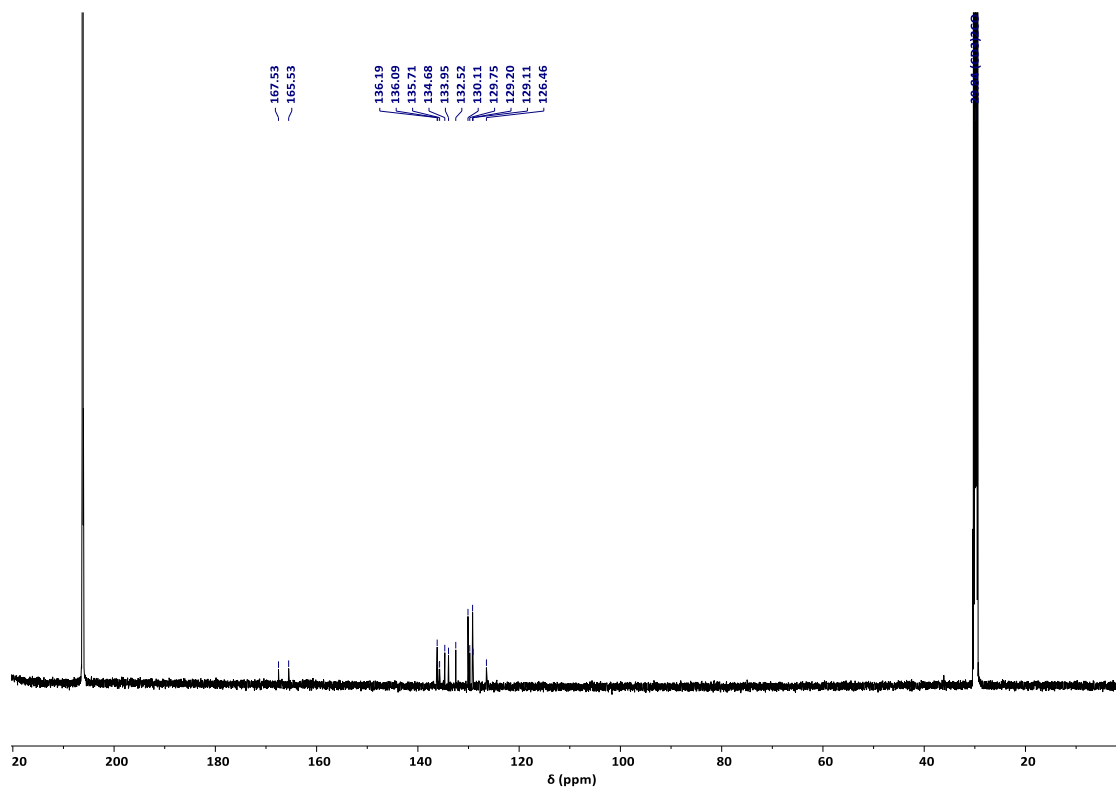

**Figure S39.** <sup>13</sup>C NMR spectrum (acetone-*d*<sub>6</sub>, 151 MHz) of **11**.

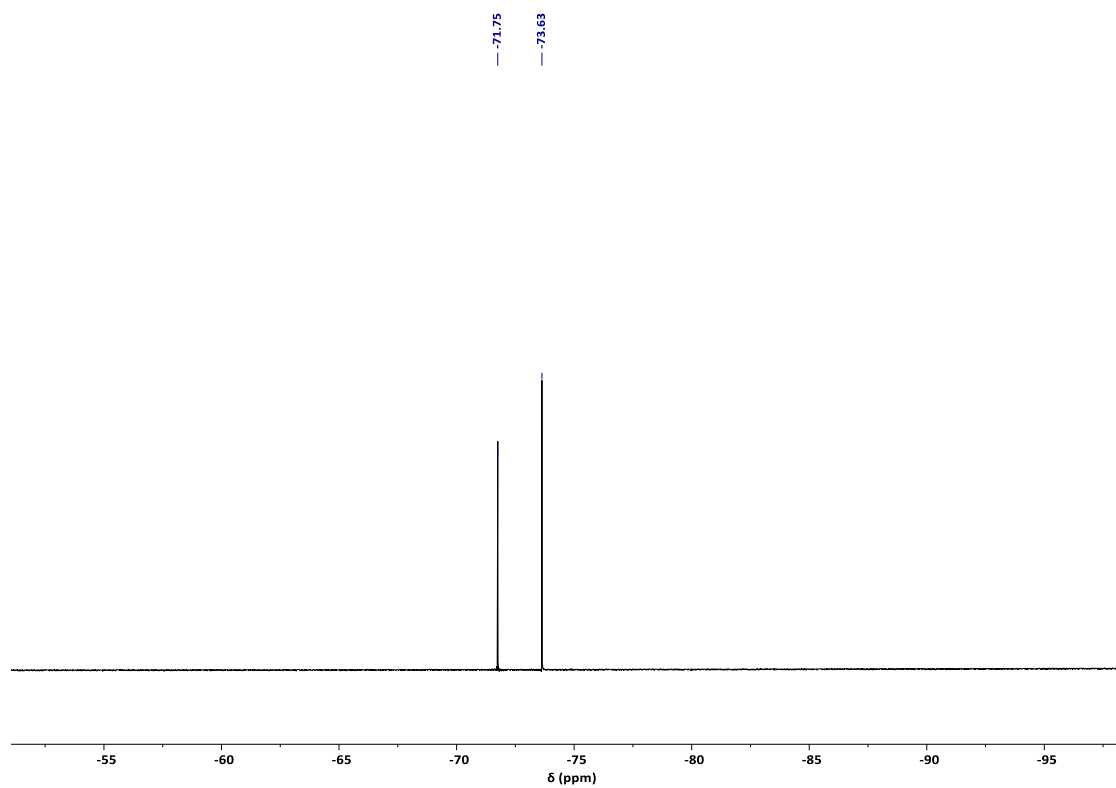

**Figure S40.** <sup>19</sup>F NMR spectrum (acetone-*d*<sub>6</sub>, 376 MHz) of **11**.



# Molecules

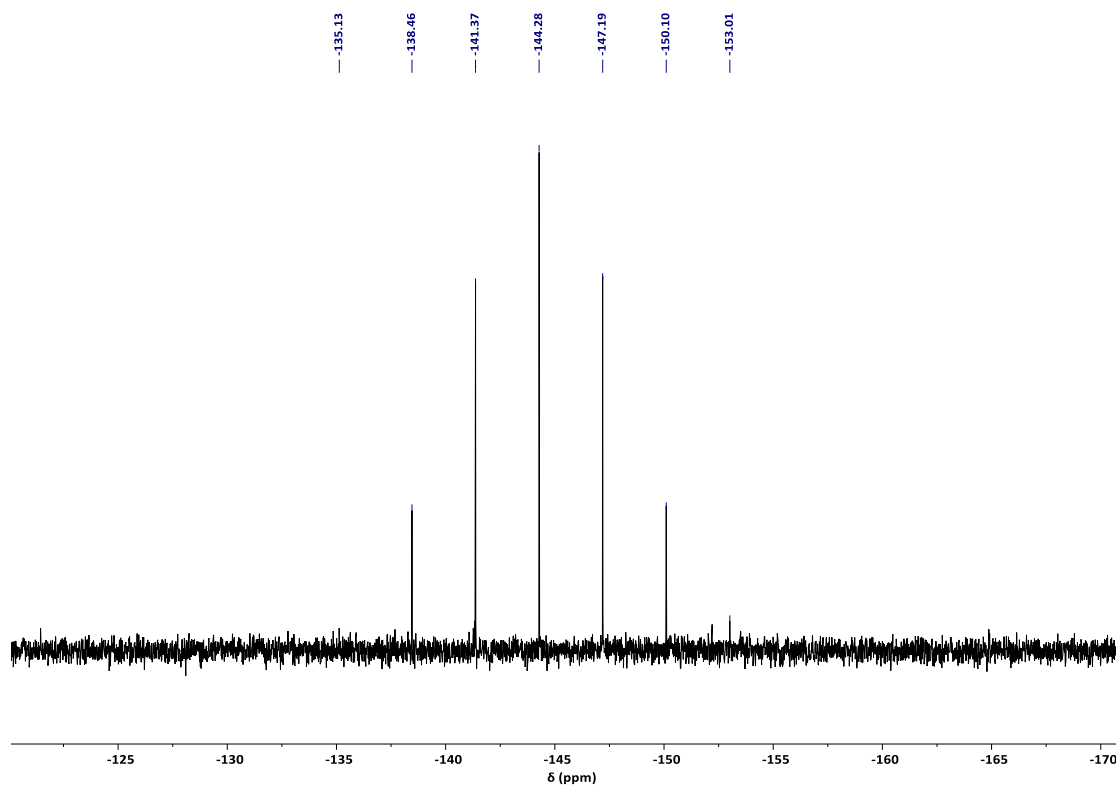

**Figure S41.**  $^{31}\text{P}$  NMR spectrum (acetone- $d_6$ , 243 MHz) of **11**.

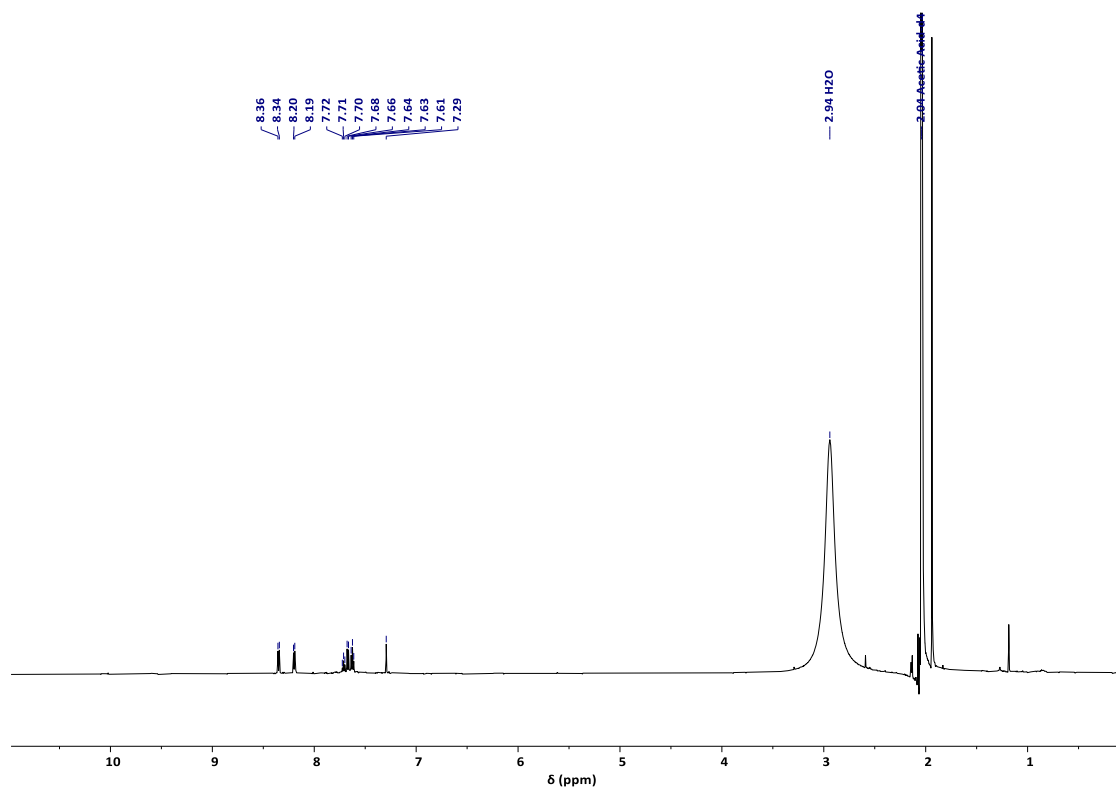

**Figure S42.**  $^1\text{H}$  NMR spectrum (acetone- $d_6$ , 600 MHz) of **12**.

# Molecules

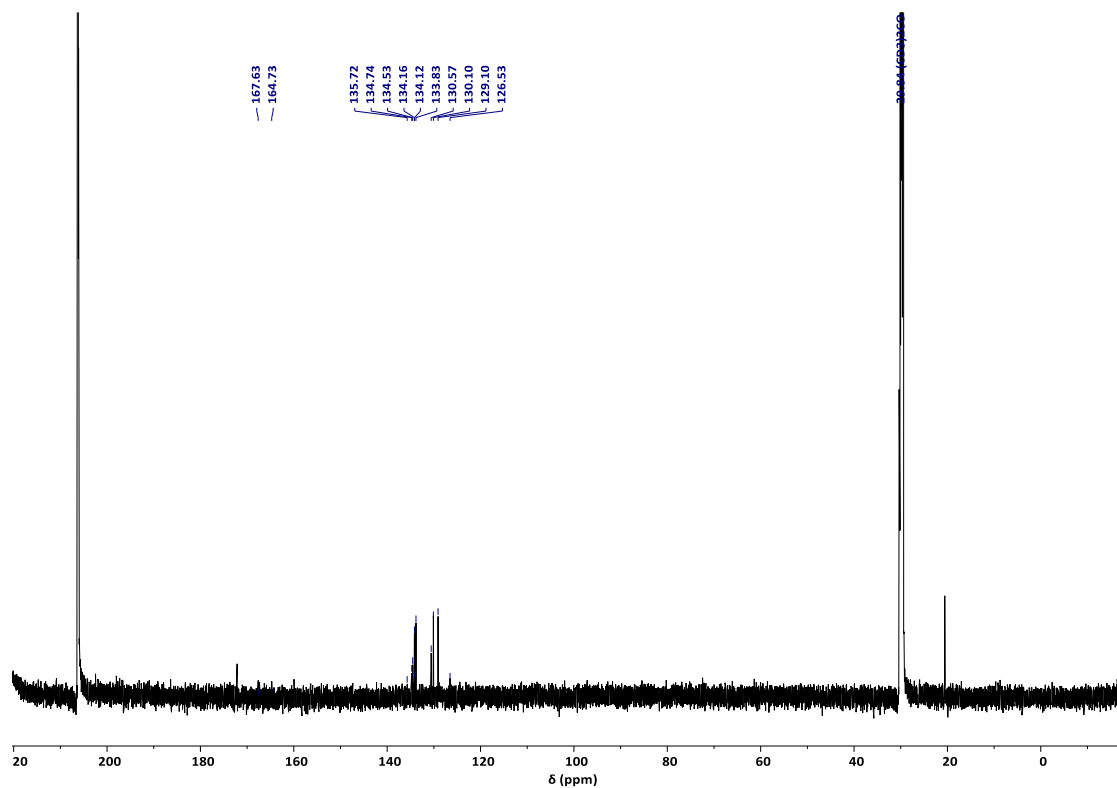

**Figure S43.** <sup>13</sup>C NMR spectrum (acetone-*d*<sub>6</sub>, 151 MHz) of **12**.

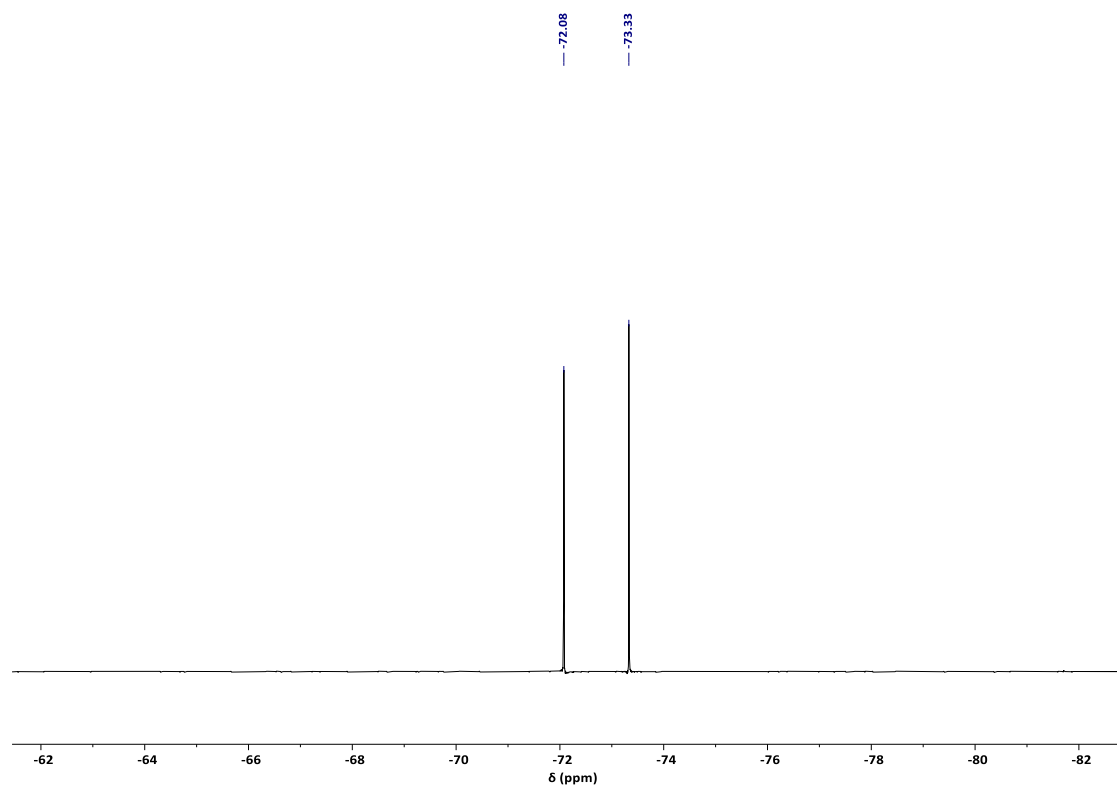

**Figure S44.** <sup>19</sup>F NMR spectrum (acetone-*d*<sub>6</sub>, 565 MHz) of **12**.

# Molecules

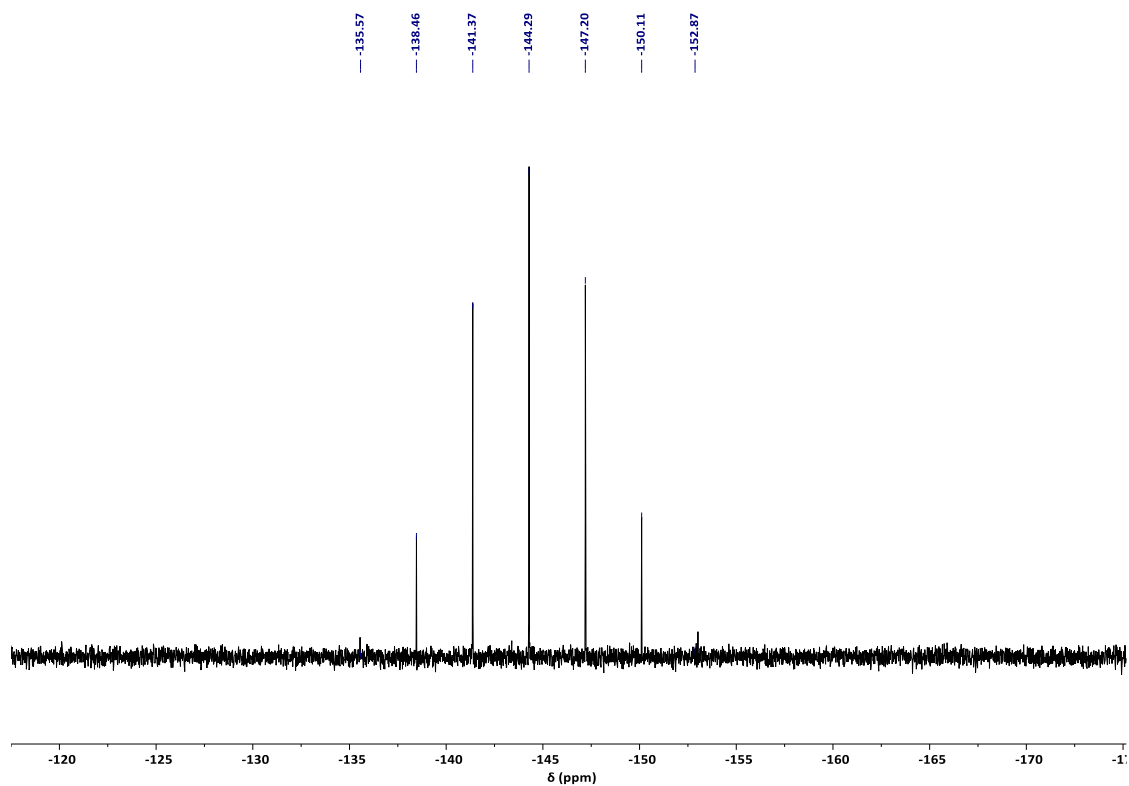

**Figure S45.**  $^{31}\text{P}$  NMR spectrum (acetone- $d_6$ , 243 MHz) of **12**.

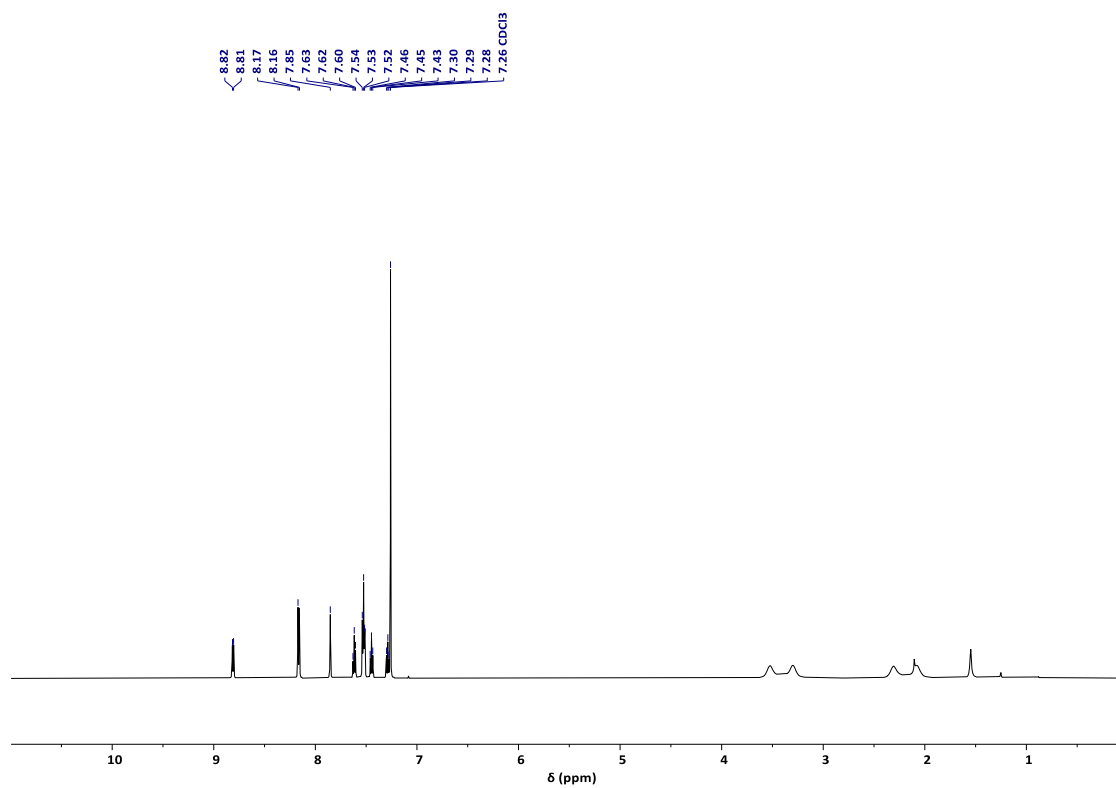

**Figure S46.**  $^1\text{H}$  NMR spectrum ( $\text{CDCl}_3$ , 600 MHz) of **13**.

# Molecules

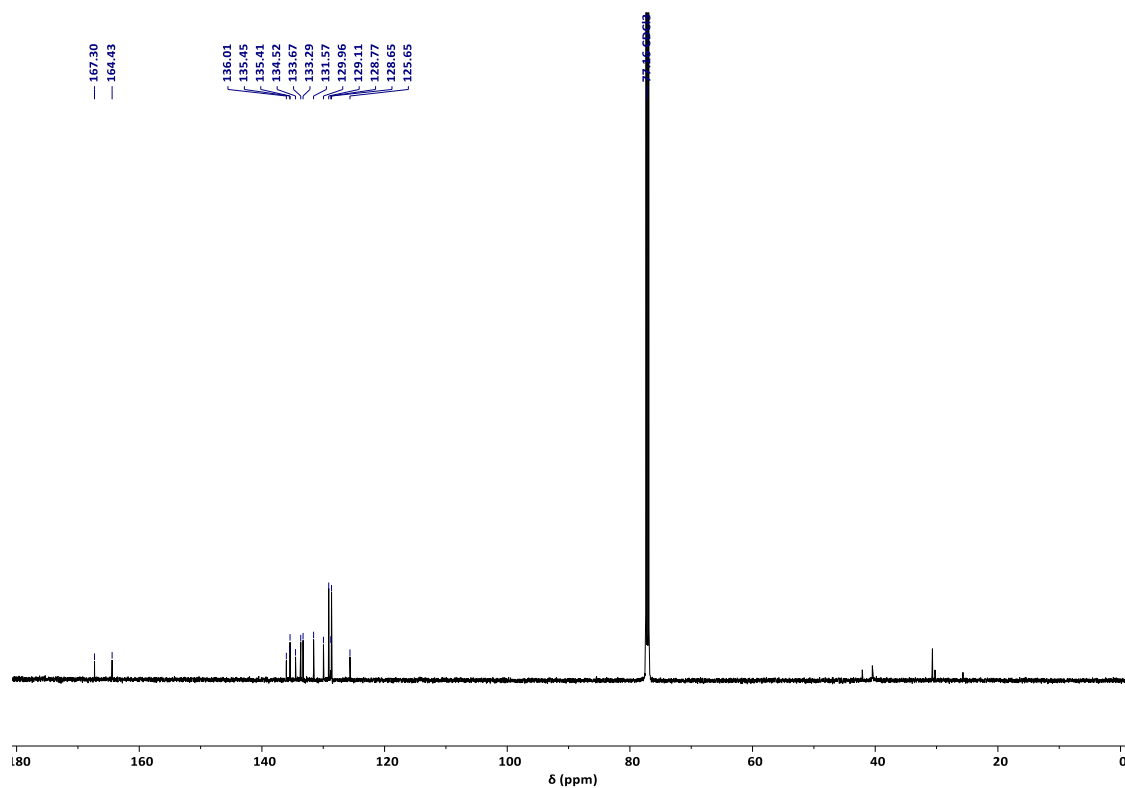

**Figure S47.**  $^{13}\text{C}$  NMR spectrum ( $\text{CDCl}_3$ , 151 MHz) of **13**.

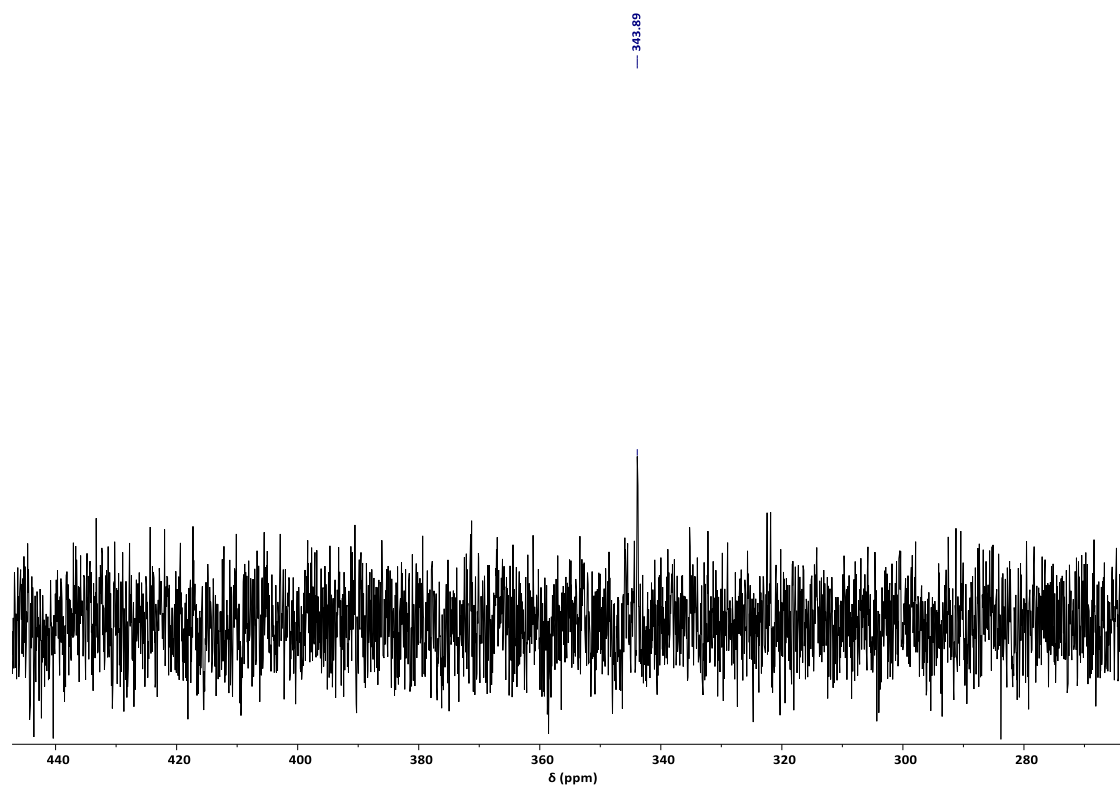

**Figure S48.**  $^{77}\text{Se}$  NMR spectrum ( $\text{CDCl}_3$ , 114 MHz) of **13**.

# Molecules

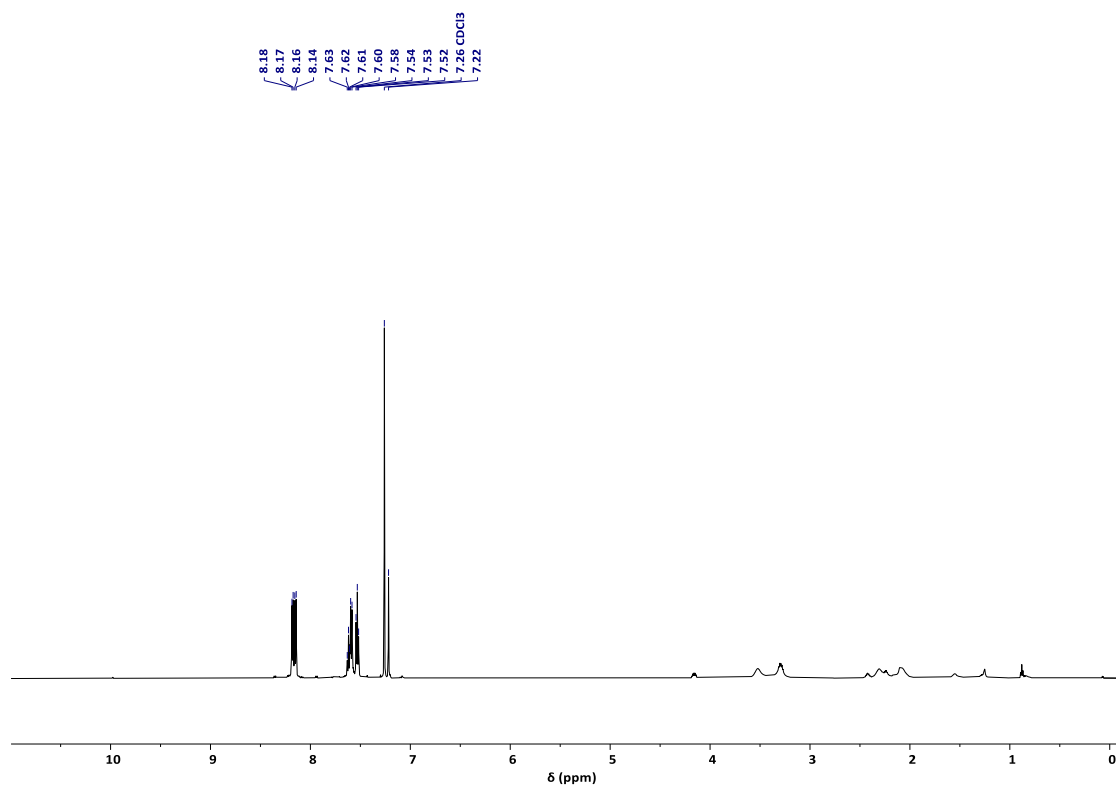

**Figure S49.** <sup>1</sup>H NMR spectrum (CDCl<sub>3</sub>, 600 MHz) of **14**.

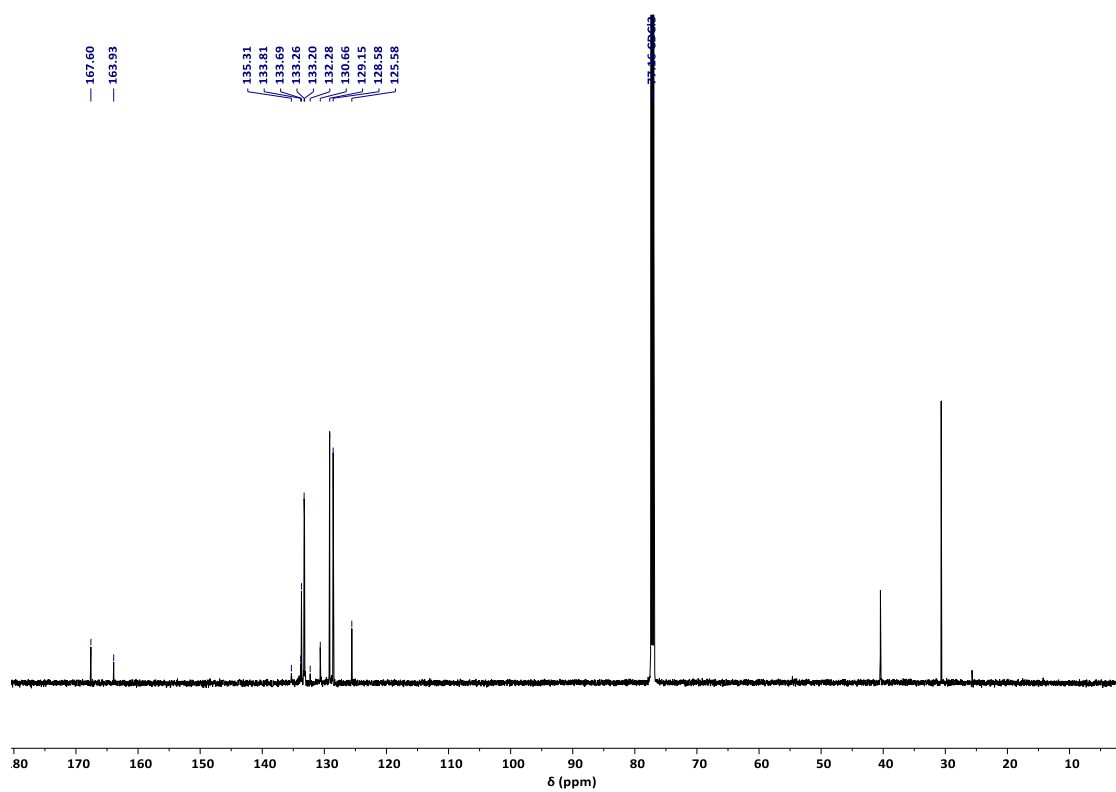

**Figure S50.** <sup>13</sup>C NMR spectrum (CDCl<sub>3</sub>, 151 MHz) of **14**.

# Molecules

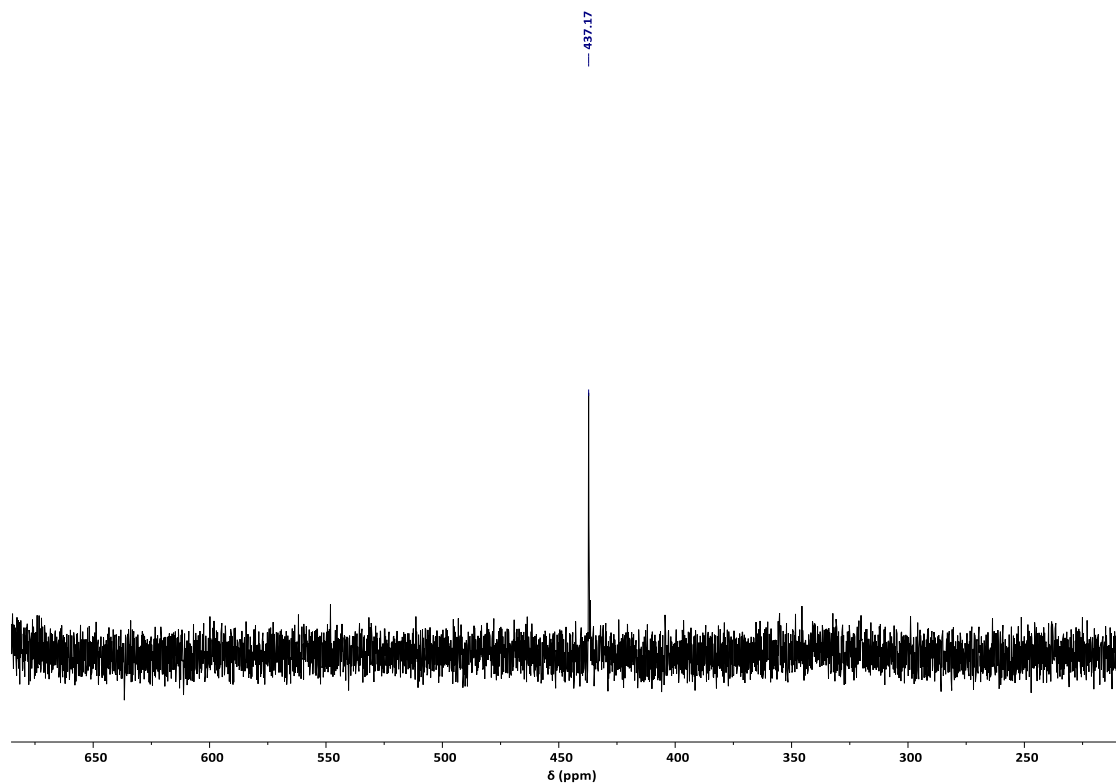

**Figure S51.**  $^{77}\text{Se}$  NMR spectrum ( $\text{CDCl}_3$ , 114 MHz) of **14**.

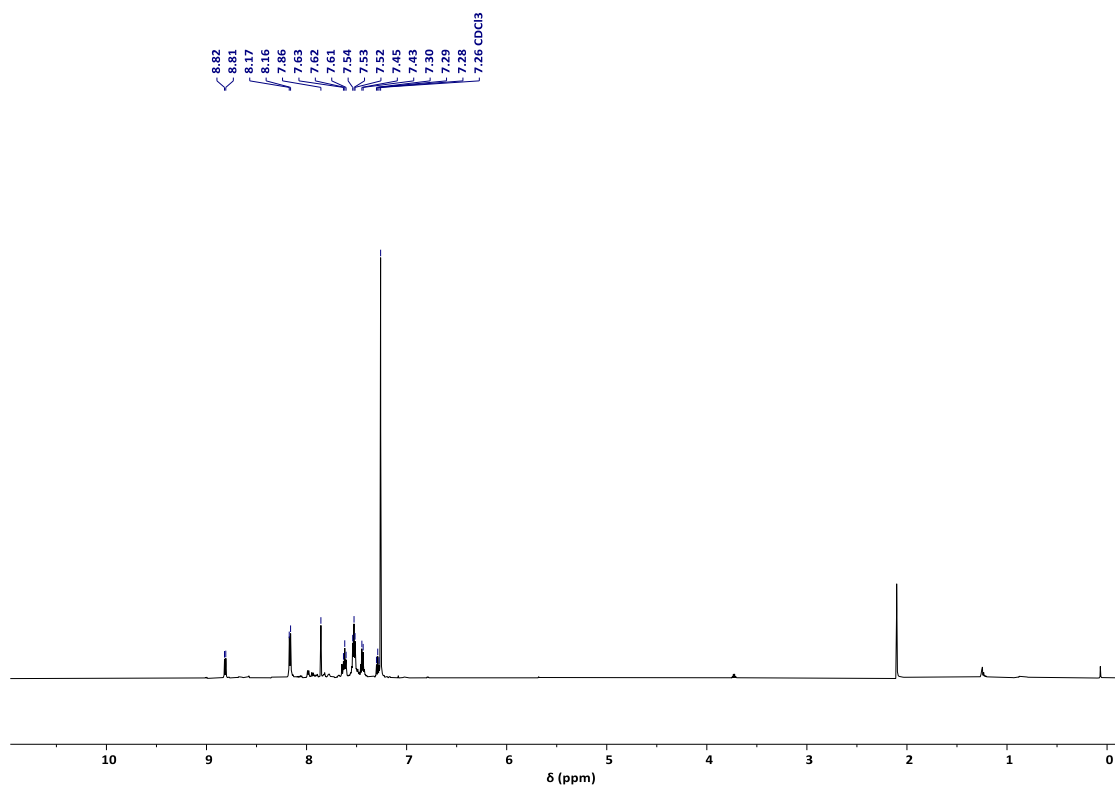

**Figure S52.**  $^1\text{H}$  NMR spectrum ( $\text{CDCl}_3$ , 400 MHz) of **15**.

# Molecules

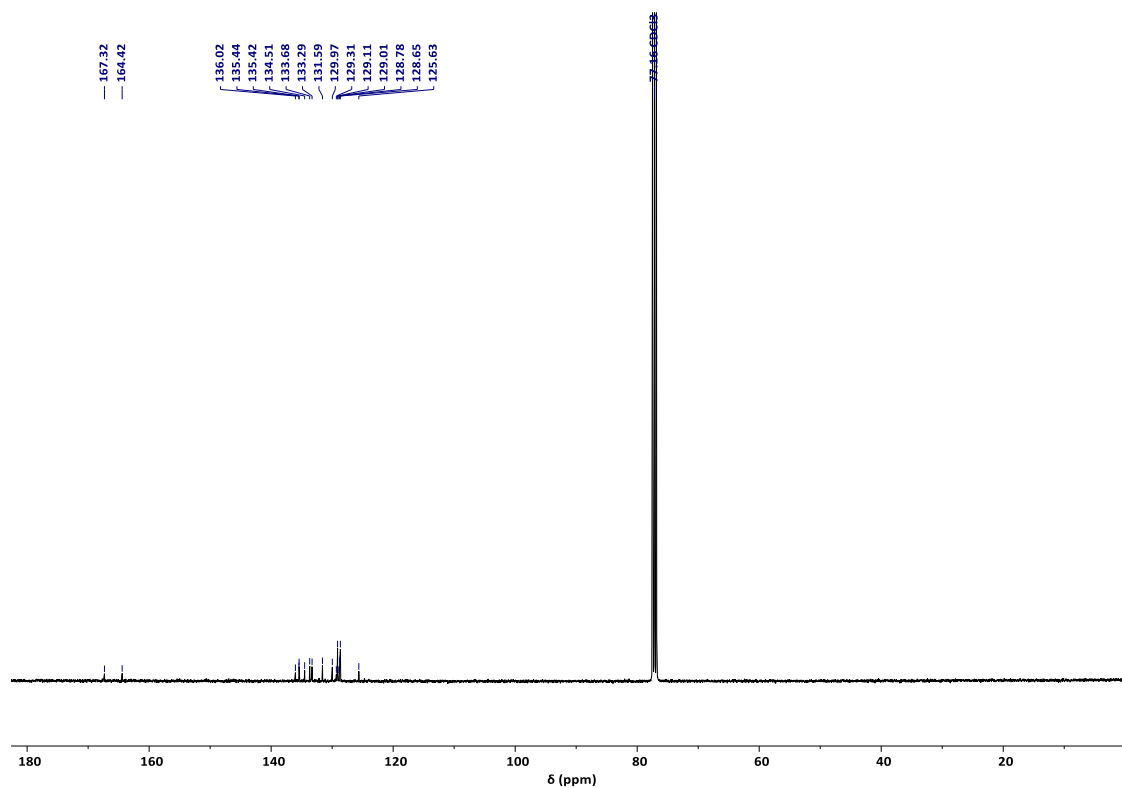

**Figure S53.** <sup>13</sup>C NMR spectrum (CDCl<sub>3</sub>, 101 MHz) of **15**.

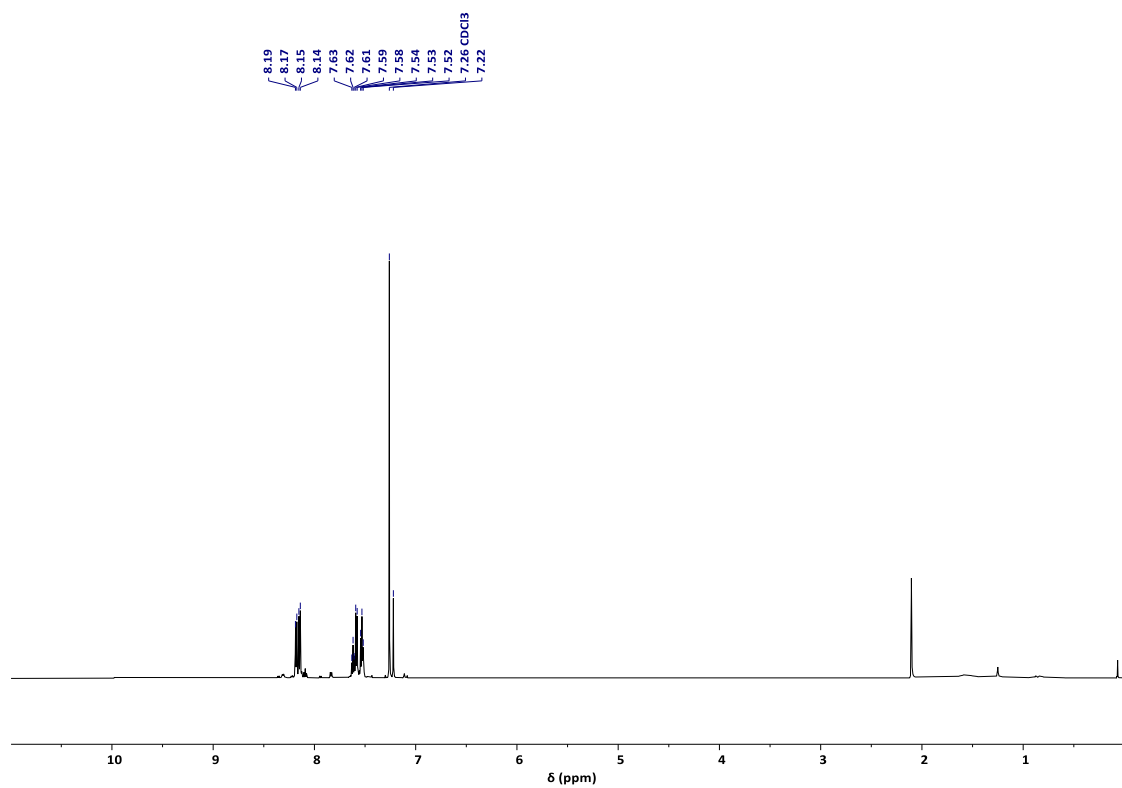

**Figure S54.** <sup>1</sup>H NMR spectrum (CDCl<sub>3</sub>, 600 MHz) of **16**.

# Molecules

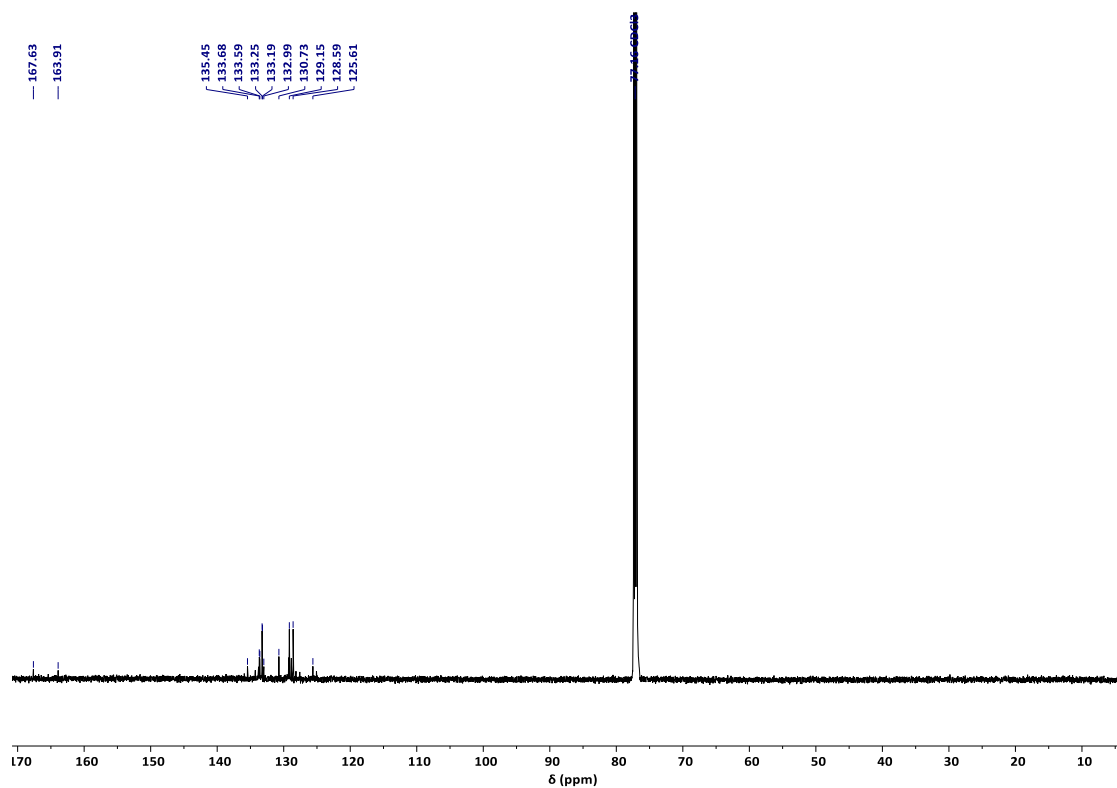

**Figure S55.**  $^{13}\text{C}$  NMR spectrum ( $\text{CDCl}_3$ , 151 MHz) of **16**.

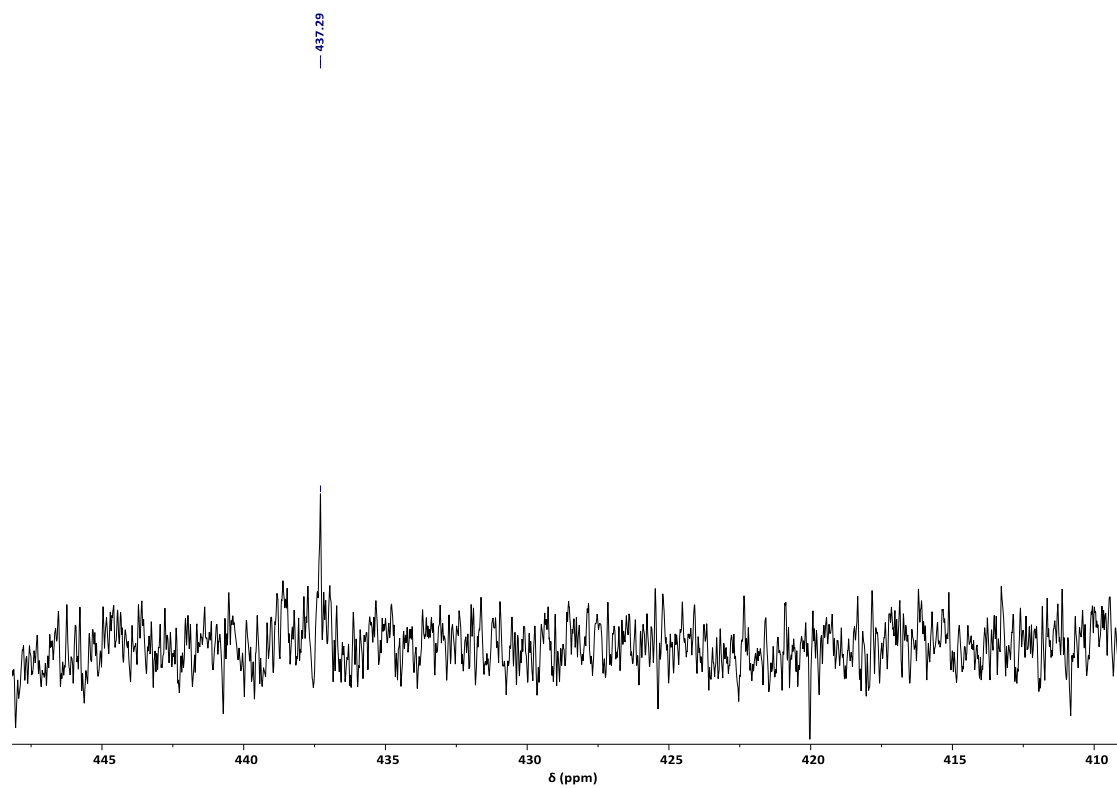

**Figure S56.**  $^{77}\text{Se}$  NMR spectrum ( $\text{CDCl}_3$ , 114 MHz) of **16**.
