# Supplementary material for: Metal Complexes Containing Homoleptic Diorganoselenium(II) Ligands: Synthesis, Characterization and Investigation of Optical Properties
Source: Molecules. 2024 Feb 8;29(4):792. doi: 10.3390/molecules29040792 (PMC10892405; doi:10.3390/molecules29040792)
Supplement: Supplementary file 1 [file molecules-29-00792-s001.zip]

Archive with 7 entries (7 files):
- Cpd_4_CCDC_2308732.cif
- Cpd_4_CCDC_2308732.pdf
- Cpd_5_CCDC_2308731.cif
- Cpd_5_CCDC_2308731.pdf
- Cpd_9_CCDC_ 2308733.cif
- Cpd_9_CCDC_ 2308733.pdf
- Molecules_ESI_2825259.pdf
