# Supplementary material for: Metal Complexes Containing Homoleptic Diorganoselenium(II) Ligands: Synthesis, Characterization and Investigation of Optical Properties
Source: Molecules. 2024 Feb 8;29(4):792. doi: 10.3390/molecules29040792 (PMC10892405; doi:10.3390/molecules29040792)
Supplement: Supplementary file 1 [file molecules-29-00792-s001.zip › Cpd_4_CCDC_2308732.cif]

data_global

_publ_requested_journal          Molecules

_publ_contact_author_name        'Alexandra Pop'
_publ_contact_author_address     
;Supramolecular Organic and Organometallic Chemistry Centre, Department of Chemistry, Faculty of Chemistry and Chemical Engineering, Babes-Bolyai University, Str. Arany Janos 11, RO-400028 Cluj-Napoca, Romania
;
_publ_contact_author_email       alexandra.m.pop@Ubbcluj.ro
_publ_contact_author_phone       ?
_publ_contact_author_fax         ?
loop_
_publ_author_name
_publ_author_address
'Darius, Dumitras'
;Supramolecular Organic and Organometallic Chemistry Centre, Department of Chemistry, Faculty of Chemistry and Chemical Engineering, Babes-Bolyai University, Str. Arany Janos 11, RO-400028 Cluj-Napoca, Romania
;
'Gal, Emese'
;Research Center on Fundamental and Applied Heterochemistry, Faculty of Chemistry and Chemical Engineering, Babes-Bolyai University, 11 Arany Janos street, RO-400028, Cluj-Napoca, Romania
;
'Silvestru, Cristian'
;Supramolecular Organic and Organometallic Chemistry Centre, Department of Chemistry, Faculty of Chemistry and Chemical Engineering, Babes-Bolyai University, Str. Arany Janos 11, RO-400028 Cluj-Napoca, Romania.
;
'Pop, Alexandra'
;Supramolecular Organic and Organometallic Chemistry Centre, Department of Chemistry, Faculty of Chemistry and Chemical Engineering, Babes-Bolyai University, Str. Arany Janos 11, RO-400028 Cluj-Napoca, Romania.
;
_audit_creation_method           'APEX4 v2021.10-0'

_publ_section_title              
;
;
_publ_section_abstract           
;
;
_publ_section_references         
;
;
_publ_section_comment            
;
;

data_ale274
_chemical_name_systematic               ?
_chemical_name_common                   DMI-57
_chemical_formula_moiety                ?
_chemical_formula_sum                   'C14 H10 O2 Se'
_chemical_formula_iupac                 ?
_chemical_formula_weight                289.18

_chemical_melting_point                 ?

_space_group_crystal_system             monoclinic
_space_group_IT_number                  14
_space_group_name_H-M_alt               'P 1 21/n 1'
_space_group_name_Hall                  '-P 2yn'
loop_
    _space_group_symop_operation_xyz
    'x, y, z'
    '-x+1/2, y+1/2, -z+1/2'
    '-x, -y, -z'
    'x-1/2, -y-1/2, z-1/2'

_cell_length_a                          12.2490(4)
_cell_length_b                          7.5386(3)
_cell_length_c                          12.9332(5)
_cell_angle_alpha                       90
_cell_angle_beta                        102.5630(10)
_cell_angle_gamma                       90
_cell_volume                            1165.66(8)
_cell_formula_units_Z                   4
_cell_measurement_reflns_used           9967
_cell_measurement_theta_min             3.1946
_cell_measurement_theta_max             28.2760
_cell_measurement_temperature           100.(2)

_exptl_crystal_description              block
_exptl_crystal_colour                   ?
_exptl_crystal_size_max                 0.128
_exptl_crystal_size_mid                 0.115
_exptl_crystal_size_min                 0.059
_exptl_crystal_density_diffrn           1.648
_exptl_crystal_density_meas             ?
_exptl_crystal_density_method           'not measured'
_exptl_crystal_F_000                    576

_exptl_absorpt_coefficient_mu           3.206
_exptl_absorpt_correction_type          Multi-Scan
_exptl_absorpt_process_details          
;
Krause, L., Herbst-Irmer, R., Sheldrick G.M. & Stalke D.,
J. Appl. Cryst. 48 (2015) 3-10
;
_exptl_absorpt_correction_T_min         0.72
_exptl_absorpt_correction_T_max         0.83

_exptl_special_details                  
;
; 

_diffrn_ambient_temperature             100.(2)

_diffrn_source                          
    'Incoatec Mo--I\mS 3.0 microfocus source'
_diffrn_source_type                     ?
_diffrn_source_power                    0.07
_diffrn_source_current                  1.4
_diffrn_source_voltage                  50

_diffrn_radiation_probe                 ?
_diffrn_radiation_type                  'Mo K\a'
_diffrn_radiation_wavelength            0.71073
_diffrn_radiation_monochromator         'multilayer optics'

_diffrn_measurement_device              ?
_diffrn_measurement_device_type         'Bruker D8 Venture'
_diffrn_measurement_method              '\f and \w scans'

_diffrn_detector_area_resol_mean        7.3910

_diffrn_reflns_number                   33053
_diffrn_reflns_av_R_equivalents         0.0470
_diffrn_reflns_av_unetI/netI            0.0224
_diffrn_reflns_theta_min                2.08
_diffrn_reflns_theta_max                28.30
_diffrn_reflns_theta_full               25.24
_diffrn_measured_fraction_theta_max     1.000
_diffrn_measured_fraction_theta_full    1.000
_diffrn_reflns_limit_h_min              -16
_diffrn_reflns_limit_h_max              14
_diffrn_reflns_limit_k_min              -10
_diffrn_reflns_limit_k_max              10
_diffrn_reflns_limit_l_min              -17
_diffrn_reflns_limit_l_max              17

_refine_special_details                 
;
;

_reflns_number_total                    2888
_reflns_number_gt                       2457
_reflns_threshold_expression            'I > 2\s(I)'
_reflns_Friedel_coverage                0.000
_reflns_Friedel_fraction_max            .
_reflns_Friedel_fraction_full           .

_refine_ls_structure_factor_coef        Fsqd
_refine_ls_matrix_type                  full
_refine_ls_R_factor_all                 0.0379
_refine_ls_R_factor_gt                  0.0286
_refine_ls_wR_factor_gt                 0.0663
_refine_ls_wR_factor_ref                0.0709
_refine_ls_goodness_of_fit_ref          1.044
_refine_ls_restrained_S_all             1.044
_refine_ls_number_reflns                2888
_refine_ls_number_parameters            154
_refine_ls_number_restraints            0
_refine_ls_number_constraints           ?
_refine_ls_hydrogen_treatment           constr
_refine_ls_weighting_scheme             calc
_refine_ls_weighting_details            
    'w=1/[\s^2^(Fo^2^)+(0.0299P)^2^+1.3035P] where P=(Fo^2^+2Fc^2^)/3'

_atom_sites_solution_hydrogens          geom
_atom_sites_solution_primary            ?
_atom_sites_solution_secondary          ?

_refine_ls_shift/su_max                 0.001
_refine_ls_shift/su_mean                0.000
_refine_diff_density_max                0.869
_refine_diff_density_min                -0.500
_refine_ls_extinction_method            none
_refine_ls_extinction_coef              ?

loop_
    _atom_type_symbol
    _atom_type_description
    _atom_type_scat_dispersion_real
    _atom_type_scat_dispersion_imag
    _atom_type_scat_source
    C C 0.0033 0.0016 'International Tables Vol C Tables 4.2.6.8 and 6.1.1.4'
    H H 0.0000 0.0000 'International Tables Vol C Tables 4.2.6.8 and 6.1.1.4'
    O O 0.0106 0.0060 'International Tables Vol C Tables 4.2.6.8 and 6.1.1.4'
    Se Se -0.0929 2.2259
     'International Tables Vol C Tables 4.2.6.8 and 6.1.1.4'

_computing_data_collection              'Bruker APEX4 2021.10-0'
_computing_cell_refinement              'SAINT V8.40B (Bruker AXS LLC, 2019)'
_computing_data_reduction               'SAINT V8.40B (Bruker AXS LLC, 2019)'
_computing_structure_solution           'XT, VERSION 2018/2'
_computing_structure_refinement         'SHELXL-2019/1 (Sheldrick, 2019)'
_computing_molecular_graphics           'shelXle (C.B. Huebschle, rev 1328)'
_computing_publication_material         'Bruker APEX4 2021.10-0'

loop_
    _atom_site_type_symbol
    _atom_site_label
    _atom_site_fract_x
    _atom_site_fract_y
    _atom_site_fract_z
    _atom_site_U_iso_or_equiv
    _atom_site_adp_type
    _atom_site_calc_flag
    _atom_site_refinement_flags_adp
    _atom_site_refinement_flags_occupancy
    _atom_site_refinement_flags_posn
    _atom_site_occupancy
    _atom_site_disorder_assembly
    _atom_site_disorder_group
    Se Se1 0.41504(2) 0.98542(3) 0.17359(2) 0.02395(8) Uani d . . . 1 . .
    O O1 0.58045(19) 0.6619(3) 0.68425(15) 0.0460(5) Uani d . . . 1 . .
    O O2 0.30375(15) 0.2261(2) -0.13722(13) 0.0316(4) Uani d . . . 1 . .
    C C1 0.44006(18) 0.8684(3) 0.30820(16) 0.0197(4) Uani d . . . 1 . .
    C C2 0.54819(19) 0.8629(3) 0.36937(19) 0.0264(5) Uani d . . . 1 . .
    H H2 0.608698 0.906655 0.341634 0.032000 Uiso calc U . R 1 . .
    C C3 0.5678(2) 0.7935(3) 0.47092(19) 0.0288(5) Uani d . . . 1 . .
    H H3 0.641452 0.792073 0.513573 0.035000 Uiso calc U . R 1 . .
    C C4 0.4790(2) 0.7258(3) 0.51031(17) 0.0244(5) Uani d . . . 1 . .
    C C5 0.37159(19) 0.7261(3) 0.44719(18) 0.0250(5) Uani d . . . 1 . .
    H H5 0.311758 0.675720 0.473237 0.030000 Uiso calc U . R 1 . .
    C C6 0.35101(19) 0.7996(3) 0.34625(17) 0.0233(4) Uani d . . . 1 . .
    H H6 0.277214 0.802741 0.303862 0.028000 Uiso calc U . R 1 . .
    C C7 0.4956(2) 0.6562(3) 0.6200(2) 0.0347(6) Uani d . . . 1 . .
    H H7 0.433050 0.602846 0.640170 0.042000 Uiso calc U . R 1 . .
    C C8 0.39052(17) 0.7879(3) 0.07928(16) 0.0187(4) Uani d . . . 1 . .
    C C9 0.38638(17) 0.6117(3) 0.11135(17) 0.0205(4) Uani d . . . 1 . .
    H H9 0.397668 0.583477 0.184509 0.025000 Uiso calc U . R 1 . .
    C C10 0.36581(17) 0.4786(3) 0.03638(17) 0.0206(4) Uani d . . . 1 . .
    H H10 0.362613 0.358749 0.058224 0.025000 Uiso calc U . R 1 . .
    C C11 0.34963(17) 0.5186(3) -0.07153(17) 0.0203(4) Uani d . . . 1 . .
    C C12 0.35663(19) 0.6947(3) -0.10211(18) 0.0235(4) Uani d . . . 1 . .
    H H12 0.347741 0.722363 -0.175129 0.028000 Uiso calc U . R 1 . .
    C C13 0.37622(18) 0.8296(3) -0.02833(17) 0.0227(4) Uani d . . . 1 . .
    H H13 0.379966 0.949344 -0.050257 0.027000 Uiso calc U . R 1 . .
    C C14 0.32342(19) 0.3813(3) -0.15286(18) 0.0257(5) Uani d . . . 1 . .
    H H14 0.321533 0.415690 -0.223894 0.031000 Uiso calc U . R 1 . .

loop_
    _atom_site_aniso_label
    _atom_site_aniso_U_11
    _atom_site_aniso_U_22
    _atom_site_aniso_U_33
    _atom_site_aniso_U_12
    _atom_site_aniso_U_13
    _atom_site_aniso_U_23
    Se1 0.03500(14) 0.01723(11) 0.01996(12) 0.00049(9) 0.00668(9) 0.00162(8)
    O1 0.0641(14) 0.0353(10) 0.0305(10) 0.0065(10) -0.0073(9) 0.0021(8)
    O2 0.0401(10) 0.0238(8) 0.0287(9) -0.0010(7) 0.0027(7) -0.0028(7)
    C1 0.0237(10) 0.0178(9) 0.0171(10) 0.0014(8) 0.0038(8) 0.0000(8)
    C2 0.0210(11) 0.0239(11) 0.0326(12) -0.0015(8) 0.0021(9) 0.0021(9)
    C3 0.0263(11) 0.0241(11) 0.0302(12) 0.0013(9) -0.0066(9) -0.0003(9)
    C4 0.0343(13) 0.0180(10) 0.0191(11) 0.0058(9) 0.0020(9) -0.0023(8)
    C5 0.0275(11) 0.0267(11) 0.0218(11) 0.0023(9) 0.0078(9) 0.0011(9)
    C6 0.0206(10) 0.0270(11) 0.0215(11) 0.0003(9) 0.0026(8) 0.0013(9)
    C7 0.0508(16) 0.0211(11) 0.0275(13) 0.0073(11) -0.0014(11) -0.0033(10)
    C8 0.0189(10) 0.0195(10) 0.0175(10) 0.0004(8) 0.0032(8) 0.0007(8)
    C9 0.0227(10) 0.0205(10) 0.0176(10) 0.0015(8) 0.0030(8) 0.0047(8)
    C10 0.0188(10) 0.0189(10) 0.0234(11) 0.0004(8) 0.0032(8) 0.0047(8)
    C11 0.0177(9) 0.0218(10) 0.0210(10) 0.0014(8) 0.0030(8) 0.0008(8)
    C12 0.0262(11) 0.0253(11) 0.0185(10) 0.0015(9) 0.0038(9) 0.0048(8)
    C13 0.0264(11) 0.0200(10) 0.0218(11) 0.0017(8) 0.0051(9) 0.0054(8)
    C14 0.0267(11) 0.0273(12) 0.0221(11) -0.0005(9) 0.0029(9) -0.0007(9)

_geom_special_details                   
;

All esds (except the esd in the dihedral angle between two l.s. planes)
are estimated using the full covariance matrix.  The cell esds are taken
into account individually in the estimation of esds in distances, angles
and torsion angles; correlations between esds in cell parameters are only
used when they are defined by crystal symmetry.  An approximate (isotropic)
treatment of cell esds is used for estimating esds involving l.s. planes.
;

loop_
    _geom_bond_atom_site_label_1
    _geom_bond_atom_site_label_2
    _geom_bond_site_symmetry_2
    _geom_bond_distance
    _geom_bond_publ_flag
    Se1 C8 . 1.907(2) ?
    Se1 C1 . 1.916(2) ?
    O1 C7 . 1.182(3) ?
    O2 C14 . 1.220(3) ?
    C1 C2 . 1.388(3) ?
    C1 C6 . 1.391(3) ?
    C2 C3 . 1.385(3) ?
    C3 C4 . 1.394(3) ?
    C4 C5 . 1.389(3) ?
    C4 C7 . 1.485(3) ?
    C5 C6 . 1.390(3) ?
    C8 C9 . 1.396(3) ?
    C8 C13 . 1.400(3) ?
    C9 C10 . 1.380(3) ?
    C10 C11 . 1.399(3) ?
    C11 C12 . 1.393(3) ?
    C11 C14 . 1.461(3) ?
    C12 C13 . 1.380(3) ?

loop_
    _geom_angle_atom_site_label_1
    _geom_angle_atom_site_label_2
    _geom_angle_atom_site_label_3
    _geom_angle_site_symmetry_1
    _geom_angle_site_symmetry_3
    _geom_angle
    _geom_angle_publ_flag
    C8 Se1 C1 . . 101.15(9) ?
    C2 C1 C6 . . 120.8(2) ?
    C2 C1 Se1 . . 118.42(16) ?
    C6 C1 Se1 . . 120.69(16) ?
    C3 C2 C1 . . 119.9(2) ?
    C2 C3 C4 . . 119.8(2) ?
    C5 C4 C3 . . 119.9(2) ?
    C5 C4 C7 . . 118.5(2) ?
    C3 C4 C7 . . 121.6(2) ?
    C4 C5 C6 . . 120.5(2) ?
    C5 C6 C1 . . 119.0(2) ?
    O1 C7 C4 . . 125.1(3) ?
    C9 C8 C13 . . 120.30(19) ?
    C9 C8 Se1 . . 124.33(16) ?
    C13 C8 Se1 . . 115.37(15) ?
    C10 C9 C8 . . 119.7(2) ?
    C9 C10 C11 . . 120.58(19) ?
    C12 C11 C10 . . 119.0(2) ?
    C12 C11 C14 . . 119.2(2) ?
    C10 C11 C14 . . 121.8(2) ?
    C13 C12 C11 . . 121.2(2) ?
    C12 C13 C8 . . 119.1(2) ?
    O2 C14 C11 . . 125.5(2) ?

loop_
    _geom_torsion_atom_site_label_1
    _geom_torsion_atom_site_label_2
    _geom_torsion_atom_site_label_3
    _geom_torsion_atom_site_label_4
    _geom_torsion_site_symmetry_1
    _geom_torsion_site_symmetry_2
    _geom_torsion_site_symmetry_3
    _geom_torsion_site_symmetry_4
    _geom_torsion
    _geom_torsion_publ_flag
    C6 C1 C2 C3 . . . . -2.1(3) ?
    Se1 C1 C2 C3 . . . . 174.24(17) ?
    C1 C2 C3 C4 . . . . 1.4(3) ?
    C2 C3 C4 C5 . . . . 0.8(3) ?
    C2 C3 C4 C7 . . . . -177.8(2) ?
    C3 C4 C5 C6 . . . . -2.4(3) ?
    C7 C4 C5 C6 . . . . 176.2(2) ?
    C4 C5 C6 C1 . . . . 1.8(3) ?
    C2 C1 C6 C5 . . . . 0.5(3) ?
    Se1 C1 C6 C5 . . . . -175.76(16) ?
    C5 C4 C7 O1 . . . . -173.5(2) ?
    C3 C4 C7 O1 . . . . 5.1(4) ?
    C13 C8 C9 C10 . . . . -1.3(3) ?
    Se1 C8 C9 C10 . . . . 178.66(16) ?
    C8 C9 C10 C11 . . . . 0.3(3) ?
    C9 C10 C11 C12 . . . . 1.2(3) ?
    C9 C10 C11 C14 . . . . -177.6(2) ?
    C10 C11 C12 C13 . . . . -1.7(3) ?
    C14 C11 C12 C13 . . . . 177.1(2) ?
    C11 C12 C13 C8 . . . . 0.7(3) ?
    C9 C8 C13 C12 . . . . 0.8(3) ?
    Se1 C8 C13 C12 . . . . -179.18(17) ?
    C12 C11 C14 O2 . . . . -172.1(2) ?
    C10 C11 C14 O2 . . . . 6.7(4) ?

_shelx_res_file                         
;

TITL mo_ale274_0m_a.res in P2(1)/n
    mo_ale274_0m_a.res
    created by SHELXL-2019/1 at 14:17:23 on 21-Jun-2022
REM Old TITL mo_ale274_0m in P2(1)/n
REM SHELXT solution in P2(1)/n: R1 0.093, Rweak 0.003, Alpha 0.052
REM <I/s>   0.307 for  195 systematic absences,  Orientation as input
REM Formula found by SHELXT:  C14 O2 Se
CELL  0.71073  12.2490   7.5386  12.9332   90.000  102.563   90.000
ZERR    4.000   0.0004   0.0003   0.0005    0.000    0.001    0.000
LATT  1
SYMM 1/2-X, 1/2+Y, 1/2-Z
SFAC C H O SE
UNIT 56 40 8 4
TEMP -173.150
L.S. 10
BOND
LIST 4
acta
conf
size 0.128 0.115 0.059
FMAP 2
PLAN 20
WGHT    0.029900    1.303500
FVAR       0.36082
SE1   4    0.415040    0.985417    0.173593    11.00000    0.03500    0.01723 =
         0.01996    0.00162    0.00668    0.00049
O1    3    0.580446    0.661902    0.684252    11.00000    0.06407    0.03534 =
         0.03047    0.00212   -0.00735    0.00654
O2    3    0.303753    0.226089   -0.137224    11.00000    0.04012    0.02380 =
         0.02874   -0.00277    0.00268   -0.00098
C1    1    0.440063    0.868377    0.308201    11.00000    0.02372    0.01783 =
         0.01713    0.00003    0.00385    0.00138
C2    1    0.548188    0.862892    0.369367    11.00000    0.02098    0.02389 =
         0.03262    0.00214    0.00206   -0.00147
AFIX  43
H2    2    0.608698    0.906655    0.341634    11.00000   -1.20000
AFIX   0
C3    1    0.567766    0.793519    0.470916    11.00000    0.02629    0.02409 =
         0.03024   -0.00034   -0.00656    0.00132
AFIX  43
H3    2    0.641452    0.792073    0.513573    11.00000   -1.20000
AFIX   0
C4    1    0.479014    0.725847    0.510305    11.00000    0.03433    0.01802 =
         0.01906   -0.00229    0.00201    0.00583
C5    1    0.371594    0.726126    0.447189    11.00000    0.02753    0.02667 =
         0.02180    0.00110    0.00776    0.00227
AFIX  43
H5    2    0.311758    0.675720    0.473237    11.00000   -1.20000
AFIX   0
C6    1    0.351007    0.799574    0.346245    11.00000    0.02064    0.02703 =
         0.02147    0.00132    0.00264    0.00033
AFIX  43
H6    2    0.277214    0.802741    0.303862    11.00000   -1.20000
AFIX   0
C7    1    0.495560    0.656173    0.620029    11.00000    0.05082    0.02113 =
         0.02753   -0.00327   -0.00140    0.00728
AFIX  43
H7    2    0.433050    0.602846    0.640170    11.00000   -1.20000
AFIX   0
C8    1    0.390524    0.787892    0.079283    11.00000    0.01894    0.01945 =
         0.01750    0.00070    0.00324    0.00038
C9    1    0.386377    0.611669    0.111355    11.00000    0.02266    0.02048 =
         0.01759    0.00467    0.00300    0.00152
AFIX  43
H9    2    0.397668    0.583477    0.184509    11.00000   -1.20000
AFIX   0
C10   1    0.365814    0.478603    0.036385    11.00000    0.01883    0.01891 =
         0.02342    0.00473    0.00319    0.00036
AFIX  43
H10   2    0.362613    0.358749    0.058224    11.00000   -1.20000
AFIX   0
C11   1    0.349634    0.518624   -0.071532    11.00000    0.01772    0.02176 =
         0.02096    0.00076    0.00296    0.00140
C12   1    0.356629    0.694689   -0.102110    11.00000    0.02624    0.02528 =
         0.01846    0.00480    0.00382    0.00149
AFIX  43
H12   2    0.347741    0.722363   -0.175129    11.00000   -1.20000
AFIX   0
C13   1    0.376224    0.829639   -0.028332    11.00000    0.02639    0.01998 =
         0.02179    0.00535    0.00508    0.00167
AFIX  43
H13   2    0.379966    0.949344   -0.050257    11.00000   -1.20000
AFIX   0
C14   1    0.323422    0.381277   -0.152864    11.00000    0.02671    0.02729 =
         0.02211   -0.00071    0.00288   -0.00047
AFIX  43
H14   2    0.321533    0.415690   -0.223894    11.00000   -1.20000
AFIX   0
HKLF 4


REM  mo_ale274_0m_a.res in P2(1)/n
REM wR2 = 0.0709, GooF = S = 1.044, Restrained GooF = 1.044 for all data
REM R1 = 0.0286 for 2457 Fo > 4sig(Fo) and 0.0379 for all 2888 data
REM 154 parameters refined using 0 restraints

END

WGHT      0.0299      1.3035

REM Highest difference peak  0.869,  deepest hole -0.500,  1-sigma level  0.073
Q1    1   0.4748  0.6178  0.6841  11.00000  0.05    0.87
Q2    1   0.4856  0.9613  0.2037  11.00000  0.05    0.40
Q3    1   0.5244  0.7529  0.4924  11.00000  0.05    0.39
Q4    1   0.3946  0.8594  0.1182  11.00000  0.05    0.39
Q5    1   0.3598  0.6046 -0.0805  11.00000  0.05    0.38
Q6    1   0.3577  0.5062 -0.0196  11.00000  0.05    0.38
Q7    1   0.4358  0.7267  0.4765  11.00000  0.05    0.38
Q8    1   0.3704  0.7534 -0.0603  11.00000  0.05    0.38
Q9    1   0.3485  0.9463  0.1646  11.00000  0.05    0.36
Q10   1   0.3755  0.6949  0.0893  11.00000  0.05    0.35
Q11   1   0.4302  0.9227  0.2588  11.00000  0.05    0.33
Q12   1   0.3928  0.8162  0.3258  11.00000  0.05    0.32
Q13   1   0.3843  0.8083  0.0244  11.00000  0.05    0.32
Q14   1   0.3719  0.7588  0.3923  11.00000  0.05    0.29
Q15   1   0.3405  0.4562 -0.1013  11.00000  0.05    0.28
Q16   1   0.3441  0.7120 -0.1372  11.00000  0.05    0.28
Q17   1   0.3817  0.5475  0.0712  11.00000  0.05    0.26
Q18   1   0.4795  0.6889  0.5548  11.00000  0.05    0.26
Q19   1   0.4872  0.9048  0.3382  11.00000  0.05    0.25
Q20   1   0.3715  0.6962 -0.1197  11.00000  0.05    0.25
;
_shelx_res_checksum                     17071

_shelx_hkl_file                         
;
   2   0   0 1602.84   40.20
  -2   0   0 1586.74   39.70
   3   0   0   -0.70    0.50
  -3   0   0   -0.20    0.80
  -3   0   0    1.20    0.60
  -3   0   0    0.20    0.60
  -4   0   0 3406.16   83.29
   4   0   0 3390.16   85.39
   5   0   0    0.70    0.70
  -5   0   0    0.60    0.80
  -5   0   0    1.00    0.90
   5   0   0    0.30    0.80
  -5   0   0    1.80    1.30
  -6   0   0  470.75   12.20
   6   0   0  512.75   12.50
  -6   0   0  503.45   12.50
  -6   0   0  496.05   12.80
  -6   0   0  494.95   14.80
   6   0   0  483.05   12.20
   7   0   0    1.30    0.90
  -7   0   0    0.10    1.20
   7   0   0    2.20    1.20
  -7   0   0    2.10    1.10
  -7   0   0    2.30    1.80
  -7   0   0   -1.30    1.00
   8   0   0   27.90    1.80
  -8   0   0   26.10    2.50
   8   0   0   28.50    2.00
  -8   0   0   28.70    2.70
  -8   0   0   29.90    4.10
   8   0   0   27.80    2.20
  -8   0   0   34.40    2.60
  -8   0   0   37.60    5.30
  -9   0   0    5.70    3.80
  -9   0   0    0.00    1.60
  -9   0   0    0.40    2.20
  -9   0   0    0.60    1.30
   9   0   0    0.70    0.80
  -9   0   0    0.40    1.40
   9   0   0    0.90    0.70
 -10   0   0   49.99    3.00
 -10   0   0   38.30    2.90
 -10   0   0   49.00    6.70
 -10   0   0   51.19    5.90
 -10   0   0   42.70    3.80
 -11   0   0    2.60    1.20
 -11   0   0    3.50    4.20
 -11   0   0    2.30    2.10
 -11   0   0    1.10    2.70
 -11   0   0    1.50    1.00
 -12   0   0   81.19    5.30
 -12   0   0   90.39   10.00
 -12   0   0   69.49    8.00
 -13   0   0    1.40    2.50
 -13   0   0    4.00    4.90
 -14   0   0   35.20    8.00
 -14   0   0   35.00    7.00
 -14   0   0   46.00    5.10
 -14   0   0   47.10    7.90
 -15   0   0    2.80    3.10
 -15   0   0    2.00    4.80
 -15   0   0   -5.40    4.40
 -15   0   0    8.10    5.60
   0  -1   0    0.00    0.40
   0  -1   0    0.30    0.60
   0  -1   0   -0.10    0.50
   0   1   0    0.30    0.60
   0   1   0    0.20    0.50
   0   1   0    0.50    0.70
   0   1   0   -0.20    0.40
   0   1   0   -0.60    0.60
  -1  -1   0  705.83   16.70
  -1  -1   0  690.23   16.40
  -1  -1   0  687.93   16.70
  -1  -1   0  701.43   16.60
   1  -1   0  697.83   16.50
  -1   1   0  718.33   16.40
  -1   1   0  710.13   16.50
   1   1   0  672.23   16.60
   1   1   0  698.83   16.80
   1   1   0  685.43   16.50
   1   1   0  717.73   16.70
  -1   1   0  678.43   16.30
   1   1   0  716.03   16.40
  -1   1   0  691.43   16.20
  -2  -1   0  539.25   13.50
  -2  -1   0  528.05   13.40
  -2  -1   0  527.05   13.40
  -2  -1   0  516.05   13.10
  -2  -1   0  532.95   13.90
  -2  -1   0  533.15   13.40
   2  -1   0  526.75   12.60
   2   1   0  560.64   14.50
  -2   1   0  534.75   12.60
   2   1   0  543.15   13.90
   2   1   0  529.95   13.40
   2   1   0  531.35   13.00
   2   1   0  532.65   13.30
  -2   1   0  551.54   13.00
   2   1   0  537.85   13.30
   3  -1   0  229.08    6.00
  -3  -1   0  225.88    7.10
  -3  -1   0  227.78    7.00
  -3  -1   0  240.08    7.30
  -3  -1   0  236.58    8.00
  -3  -1   0  220.28    6.90
  -3  -1   0  225.68    6.70
   3   1   0  236.78    6.50
   3   1   0  231.88    6.70
   3   1   0  235.08    7.30
   3   1   0  232.98    6.90
  -3   1   0  232.58    6.30
   3   1   0  217.48    7.10
  -3   1   0  233.98    6.10
   4  -1   0   14.40    1.10
  -4  -1   0   14.30    2.80
  -4  -1   0   15.60    1.90
  -4  -1   0   17.70    2.10
  -4  -1   0   14.70    1.90
  -4  -1   0   19.60    2.20
   4  -1   0   16.30    1.50
  -4  -1   0   13.90    2.40
   4   1   0   12.50    1.40
   4   1   0   17.30    2.10
   4   1   0   16.60    2.80
  -4   1   0   15.20    1.30
  -4   1   0   16.60    1.40
   4   1   0   16.50    1.60
   4   1   0   16.30    1.90
   5  -1   0  889.21   20.20
  -5  -1   0  855.31   21.10
  -5  -1   0  887.41   21.70
  -5  -1   0  882.51   21.50
  -5  -1   0  900.81   22.70
   5  -1   0  900.51   19.70
  -5  -1   0  871.71   23.60
  -5   1   0  860.31   20.20
  -5   1   0  863.21   20.20
   5   1   0  885.51   22.70
   5   1   0  871.01   21.20
   5   1   0  889.31   21.70
   5   1   0  810.22   19.20
  -5   1   0  857.91   19.40
   6  -1   0  478.95   11.80
  -6  -1   0  479.25   13.40
  -6  -1   0  497.85   14.80
  -6  -1   0  485.85   15.80
  -6  -1   0  499.95   13.60
  -6  -1   0  493.15   13.20
   6  -1   0  479.55   11.30
  -6   1   0  482.15   14.90
   6   1   0  486.45   15.00
   6   1   0  478.15   13.00
   6   1   0  478.65   13.50
  -6   1   0  495.85   11.90
  -7  -1   0 1009.70   24.90
   7  -1   0 1007.20   22.70
  -7  -1   0 1017.90   26.70
  -7  -1   0  995.60   24.40
   7  -1   0  982.60   21.90
   7   1   0 1004.40   24.90
  -7   1   0  997.30   23.10
   7   1   0  982.10   26.90
   7   1   0  970.70   24.20
  -7   1   0  992.70   22.90
  -7   1   0 1005.60   26.90
   7   1   0  975.40   24.10
  -7   1   0 1001.40   22.90
  -8  -1   0   14.80    3.60
  -8  -1   0   17.00    3.40
   8  -1   0   16.50    1.30
  -8  -1   0   14.90    2.50
  -8  -1   0   14.40    2.40
  -8  -1   0   19.40    2.80
   8   1   0   21.20    4.00
   8   1   0   17.20    2.30
  -8   1   0   16.50    1.80
  -8   1   0   19.90    3.80
   8   1   0   15.00    2.20
  -8   1   0   16.60    1.50
  -9  -1   0    0.30    1.80
  -9  -1   0   -3.50    3.10
  -9  -1   0    0.30    1.70
   9   1   0    1.40    1.50
  -9   1   0    1.60    3.20
  -9   1   0    0.90    0.90
  -9   1   0    0.20    0.60
  -9   1   0    1.80    1.40
 -10  -1   0  110.69    8.30
 -10  -1   0  115.29    5.90
 -10  -1   0  122.49    6.20
 -10  -1   0  104.59    7.40
 -10  -1   0  118.09    6.00
  10   1   0  107.09    4.80
 -10   1   0  108.89    5.00
 -10   1   0  127.09    8.50
  10   1   0  103.59    5.00
 -11  -1   0  161.48    7.00
 -11  -1   0  160.18    7.40
 -11  -1   0  170.88   10.20
 -11  -1   0  171.48   10.80
 -11  -1   0  130.19    7.50
 -11   1   0  161.98   10.40
 -11   1   0  160.28    9.90
 -11   1   0  147.89    6.50
 -12  -1   0   -1.50    3.60
 -12  -1   0   13.20    5.70
 -12  -1   0    1.90    2.70
 -12  -1   0    0.00    2.20
 -12  -1   0    0.20    2.10
 -12   1   0   -1.30    3.70
 -12   1   0   -0.90    2.10
 -12   1   0    7.00    4.50
 -13  -1   0   50.29    7.00
 -13  -1   0   44.20    3.60
 -13  -1   0   65.49    9.70
 -13  -1   0   58.39    6.40
 -13  -1   0   47.90    3.70
 -13   1   0   47.20    4.60
 -13   1   0   58.19    8.40
 -13   1   0   51.19    7.00
 -14  -1   0    1.90    4.50
 -14  -1   0   -3.20    4.90
 -14  -1   0    3.60    2.90
 -14   1   0    2.00    4.10
 -14   1   0   -0.40    2.30
 -14   1   0    0.20    3.10
 -14   1   0   -2.30    4.30
 -15  -1   0    3.00    3.10
 -15  -1   0   -2.60    5.40
 -15  -1   0    0.80    5.10
 -15  -1   0   -3.20    4.60
 -15   1   0   -4.70    4.50
 -15   1   0    7.90    5.60
 -15   1   0    0.80    2.80
 -15   1   0    1.80    5.40
   0  -2   0   11.90    1.90
   0  -2   0    9.40    1.50
   0  -2   0   12.10    2.10
   0  -2   0   14.80    2.20
   0   2   0    9.00    1.80
   0   2   0   10.70    1.60
   0   2   0    9.60    1.60
   0   2   0    9.40    1.70
  -1  -2   0   68.49    3.80
  -1  -2   0   75.69    3.60
  -1  -2   0   73.19    3.50
   1  -2   0   76.09    3.70
   1  -2   0   75.29    3.70
   1  -2   0   78.69    4.10
  -1  -2   0   74.19    4.10
   1  -2   0   83.59    3.30
   1   2   0   75.29    4.20
   1   2   0   77.99    3.90
  -1   2   0   77.79    4.00
  -1   2   0   78.69    3.20
  -1   2   0   73.49    3.70
   1   2   0   77.29    3.70
   1   2   0   72.79    3.80
  -1   2   0   76.19    3.50
   1   2   0   79.19    3.60
   1   2   0   74.99    3.70
  -1   2   0   83.99    4.10
   2  -2   0  145.29    5.10
   2  -2   0  144.09    5.30
  -2  -2   0  145.99    5.80
  -2  -2   0  153.38    5.70
  -2  -2   0  146.29    6.00
   2  -2   0  158.78    5.90
  -2  -2   0  139.79    6.00
  -2  -2   0  146.99    5.80
  -2  -2   0  150.18    6.30
   2   2   0  141.59    5.50
   2   2   0  151.08    5.80
   2   2   0  144.59    5.80
  -2   2   0  147.79    5.50
   2   2   0  145.19    5.70
  -2   2   0  145.79    5.70
   2   2   0  152.78    6.20
  -2   2   0  146.59    5.00
  -2   2   0  143.39    5.30
  -2   2   0  142.79    5.50
   2   2   0  150.18    5.90
  -3  -2   0   69.99    4.10
   3  -2   0   71.89    3.80
  -3  -2   0   78.49    4.30
  -3  -2   0   71.49    4.30
   3  -2   0   72.99    3.40
  -3  -2   0   69.09    4.20
  -3  -2   0   75.49    4.10
  -3   2   0   69.39    3.50
  -3   2   0   70.49    3.70
  -3   2   0   69.99    3.50
   3   2   0   78.49    3.90
  -3   2   0   70.29    3.60
   3   2   0   69.49    4.20
   3   2   0   66.89    4.00
   3   2   0   81.19    4.10
   3   2   0   74.69    3.90
  -4  -2   0  247.08    8.80
  -4  -2   0  258.77    8.90
  -4  -2   0  268.97    8.70
   4  -2   0  253.27    7.40
  -4  -2   0  239.88    9.30
   4  -2   0  250.97    7.80
  -4  -2   0  247.48    8.70
  -4   2   0  246.68    7.60
   4   2   0  246.58    8.70
  -4   2   0  250.27    8.00
   4   2   0  250.17    8.40
  -4   2   0  249.18    8.20
   4   2   0  238.88    8.00
   4   2   0  234.68    8.70
   4   2   0  252.27    8.60
   4   2   0  241.68    8.50
   4   2   0  245.18    9.30
  -4   2   0  241.08    7.40
  -5  -2   0    1.30    1.70
  -5  -2   0    0.30    2.00
  -5  -2   0    0.40    1.60
   5  -2   0    0.10    0.80
  -5  -2   0    1.40    1.80
  -5  -2   0    1.00    1.60
   5   2   0    1.10    1.80
   5   2   0    2.40    1.40
   5   2   0    0.40    1.50
   5   2   0    3.20    1.50
  -5   2   0    2.10    1.30
  -5   2   0    0.70    1.20
  -5   2   0    1.40    1.10
   6  -2   0  743.63   18.70
  -6  -2   0  749.23   21.00
  -6  -2   0  745.43   20.00
  -6  -2   0  752.92   22.70
   6  -2   0  733.33   17.80
  -6  -2   0  761.52   20.60
   6   2   0  727.43   20.90
   6   2   0  740.53   20.00
   6   2   0  767.62   20.10
   6   2   0  753.22   18.80
   6   2   0  754.62   18.70
  -6   2   0  756.02   18.30
  -6   2   0  734.63   18.60
  -6   2   0  733.43   18.40
  -7  -2   0   29.60    4.60
  -7  -2   0   19.60    3.30
  -7  -2   0   22.60    3.10
   7  -2   0   20.20    2.30
  -7  -2   0   20.50    3.40
   7   2   0   16.30    1.80
  -7   2   0   23.80    2.40
   7   2   0   15.80    2.70
   7   2   0   21.20    3.50
   7   2   0   18.00    1.90
   7   2   0   23.40    3.10
  -8  -2   0   68.39    6.00
  -8  -2   0   78.99    5.40
  -8  -2   0   80.59    5.80
  -8  -2   0   89.09    5.50
   8  -2   0   79.69    3.30
  -8  -2   0   79.99    6.70
  -8   2   0   85.99    4.10
  -8   2   0   83.49    3.80
   8   2   0   79.69    4.90
  -8   2   0   82.29    3.60
   8   2   0   74.39    4.80
  -9  -2   0   54.89    5.20
   9  -2   0   43.00    1.90
  -9  -2   0   50.09    4.70
  -9  -2   0   48.40    6.90
   9  -2   0   45.00    1.90
  -9  -2   0   46.10    4.90
  -9  -2   0   48.00    6.10
  -9   2   0   50.99    3.40
   9   2   0   47.80    4.10
  -9   2   0   50.59    2.70
   9   2   0   58.49    6.60
   9   2   0   53.39    4.20
 -10  -2   0   46.80    4.50
 -10  -2   0   45.40    5.20
 -10  -2   0   46.30    6.60
 -10  -2   0   45.20    4.90
 -10  -2   0   43.70    6.00
 -10   2   0   52.59    6.80
 -10   2   0   43.20    3.40
 -10   2   0   41.90    2.20
  10   2   0   39.30    3.80
 -11  -2   0   13.60    5.60
 -11  -2   0   13.70    3.60
 -11  -2   0   12.00    3.20
 -11  -2   0    8.80    3.40
 -11  -2   0   12.90    4.00
 -11   2   0   15.00    4.00
 -11   2   0   11.10    3.80
 -11   2   0   20.80    5.40
  11   2   0   10.70    2.70
 -11   2   0   16.50    2.70
 -12  -2   0  164.88    8.40
 -12  -2   0  202.88   12.60
 -12  -2   0  170.48    9.20
 -12  -2   0  173.18   11.30
 -12  -2   0  193.48    9.20
 -12   2   0  174.28    7.50
 -12   2   0  206.38   12.10
 -12   2   0  193.38   11.50
  12   2   0  185.28    7.70
 -12   2   0  197.18   10.40
 -13  -2   0    1.00    5.10
 -13  -2   0    3.90    4.70
 -13  -2   0    1.50    3.40
 -13  -2   0    6.80    3.00
 -13   2   0    2.90    3.40
 -13   2   0    3.40    3.60
 -13   2   0   -1.90    3.40
 -13   2   0    5.50    4.60
 -13   2   0    6.70    2.70
 -14  -2   0    4.10    2.90
 -14  -2   0    3.30    5.70
 -14  -2   0    9.20    5.30
 -14  -2   0   14.90    4.20
 -14  -2   0    4.40    2.80
 -14   2   0    5.30    5.20
 -14   2   0    8.90    3.00
 -14   2   0    5.10    4.90
 -14   2   0    7.70    4.20
 -15  -2   0   -1.30    4.90
 -15  -2   0    4.70    3.70
 -15  -2   0   -4.50    4.20
 -15  -2   0   -0.80    2.00
 -15  -2   0   -2.80    2.10
 -15   2   0    2.90    2.90
 -15   2   0    3.70    4.20
 -15   2   0   -5.30    3.70
 -15   2   0   -2.30    4.50
   0  -3   0   -1.80    1.70
   0  -3   0   -1.50    1.00
   0  -3   0   -0.90    1.10
   0  -3   0    1.00    1.20
   0   3   0   -0.20    1.60
   0   3   0    2.00    1.60
   0   3   0    1.60    1.20
   0   3   0    0.80    2.00
   0   3   0    0.90    1.60
   0   3   0    0.50    1.30
   1  -3   0  659.43   18.70
   1  -3   0  660.13   17.70
  -1  -3   0  666.93   17.60
  -1  -3   0  679.23   18.90
  -1  -3   0  635.04   17.70
   1  -3   0  627.14   18.20
  -1  -3   0  657.93   19.10
   1  -3   0  656.63   16.80
   1   3   0  639.94   18.20
  -1   3   0  648.24   17.50
  -1   3   0  634.94   16.70
  -1   3   0  644.84   18.30
   1   3   0  673.73   18.50
   1   3   0  678.83   18.90
  -1   3   0  649.64   18.00
   1   3   0  643.64   17.90
   1   3   0  672.83   17.80
   1   3   0  649.93   18.70
  -2  -3   0    5.40    2.00
  -2  -3   0    3.80    2.40
  -2  -3   0    9.40    2.20
   2  -3   0    7.20    1.90
   2  -3   0    7.50    1.90
  -2  -3   0    5.20    2.20
   2  -3   0    6.80    0.80
   2  -3   0    6.10    2.20
   2  -3   0    4.90    0.80
  -2  -3   0    7.90    2.00
  -2   3   0    7.00    2.00
  -2   3   0    4.70    2.10
   2   3   0    6.50    2.10
   2   3   0    6.50    2.20
  -2   3   0    7.80    2.00
   2   3   0    8.10    2.20
  -2   3   0    8.90    1.80
   2   3   0    3.70    1.80
   2   3   0    7.40    2.40
  -2   3   0    6.90    2.10
   2   3   0    8.60    2.10
   3  -3   0   80.99    4.90
  -3  -3   0   86.99    5.50
   3  -3   0   79.19    4.40
  -3  -3   0   78.99    5.40
  -3  -3   0   87.09    5.20
   3  -3   0   83.59    4.40
  -3  -3   0   76.59    5.00
  -3  -3   0   80.59    5.40
   3   3   0   85.39    5.20
   3   3   0   84.89    4.80
  -3   3   0   79.99    4.50
  -3   3   0   90.89    5.00
   3   3   0   83.89    5.30
   3   3   0   80.59    4.60
   3   3   0   84.79    5.50
  -3   3   0   83.89    4.60
  -3   3   0   74.19    4.90
  -3   3   0   81.29    4.10
   3   3   0   88.19    5.30
   4  -3   0   85.49    4.40
  -4  -3   0   94.29    5.70
   4  -3   0   87.89    5.10
  -4  -3   0   94.39    5.30
  -4  -3   0   85.29    6.00
  -4  -3   0   92.59    6.00
   4   3   0   84.69    5.00
   4   3   0   88.69    5.60
   4   3   0   89.89    5.10
  -4   3   0   98.29    4.90
   4   3   0   92.89    5.60
  -4   3   0   82.89    4.60
   4   3   0   85.59    5.20
  -4   3   0   74.69    4.80
  -4   3   0   82.49    4.90
  -4   3   0   90.19    5.00
   4   3   0   75.29    5.60
  -5  -3   0  360.16   15.00
  -5  -3   0  375.06   12.90
  -5  -3   0  380.66   13.20
  -5  -3   0  363.06   12.50
  -5  -3   0  355.16   15.30
   5   3   0  351.86   12.40
   5   3   0  375.46   13.60
  -5   3   0  373.96   11.90
   5   3   0  378.16   11.90
   5   3   0  375.86   12.60
   5   3   0  385.86   12.80
  -5   3   0  355.56   11.70
  -5   3   0  356.26   11.60
   5   3   0  355.26   12.50
  -5   3   0  365.06   11.30
  -6  -3   0   40.60    5.20
   6  -3   0   38.00    3.50
  -6  -3   0   45.80    5.20
  -6  -3   0   47.80    5.50
  -6  -3   0   41.60    5.00
  -6  -3   0   52.49    4.70
   6   3   0   43.50    4.00
   6   3   0   42.10    4.70
  -6   3   0   48.00    3.80
  -6   3   0   40.70    2.00
   6   3   0   49.00    4.50
  -6   3   0   40.90    3.80
   6   3   0   46.40    4.20
   6   3   0   41.80    4.60
  -6   3   0   43.40    3.70
  -6   3   0   38.80    3.20
  -7  -3   0  316.57   12.20
  -7  -3   0  318.37   11.80
  -7  -3   0  321.37   12.70
  -7  -3   0  316.77   12.50
  -7  -3   0  280.67   15.00
  -7   3   0  316.77    9.70
   7   3   0  303.47   11.40
  -7   3   0  290.87    8.50
  -7   3   0  293.37    8.60
   7   3   0  305.57   10.60
  -7   3   0  306.77   10.30
   7   3   0  271.47   13.10
  -7   3   0  298.57   11.40
   7   3   0  300.37   10.20
  -8  -3   0  139.19    9.40
  -8  -3   0  138.69    8.20
  -8  -3   0  132.59    7.60
  -8  -3   0  134.19    8.40
   8  -3   0  119.89    5.30
  -8  -3   0  121.69    7.30
   8  -3   0  130.89    6.00
   8   3   0  116.89    7.80
  -8   3   0  133.19    6.20
   8   3   0  123.59    6.90
   8   3   0  117.89    6.90
  -8   3   0  127.29    5.40
  -8   3   0  114.59    5.20
  -8   3   0  132.19    5.70
  -8   3   0  127.79    7.30
   8   3   0  118.09    5.80
   8   3   0  113.99    5.60
  -9  -3   0   25.40    4.70
  -9  -3   0   27.00    5.30
   9  -3   0   28.00    2.70
  -9  -3   0   27.10    4.40
  -9  -3   0   22.40    5.60
   9  -3   0   30.50    2.90
  -9  -3   0   33.20    5.00
   9   3   0   30.00    2.40
  -9   3   0   32.10    4.90
   9   3   0   39.20    4.80
  -9   3   0   33.50    3.60
  -9   3   0   29.20    3.20
  -9   3   0   29.40    3.70
   9   3   0   32.30    2.40
 -10  -3   0   62.09    6.60
 -10  -3   0   54.89    6.10
 -10  -3   0   56.09    6.70
 -10  -3   0   65.99    8.50
  10  -3   0   50.59    2.40
 -10  -3   0   48.80    6.30
 -10   3   0   49.90    3.40
 -10   3   0   52.79    4.50
 -10   3   0   47.90    4.30
  10   3   0   44.40    5.20
 -10   3   0   43.10    5.80
 -10   3   0   49.30    4.40
 -11  -3   0  338.87   13.70
 -11  -3   0  351.96   14.40
 -11  -3   0  342.97   15.00
 -11  -3   0  328.37   13.60
 -11  -3   0  315.07   19.30
 -11   3   0  347.87   12.20
  11   3   0  328.17   12.60
 -11   3   0  330.97   12.00
 -11   3   0  327.37   15.00
 -11   3   0  304.67   14.00
 -11   3   0  334.57    8.80
 -11   3   0  330.87   11.30
 -12  -3   0   -2.30    3.20
 -12  -3   0   -2.00    3.40
 -12  -3   0    2.40    3.30
 -12  -3   0    1.00    3.20
 -12  -3   0   -3.30    2.70
  12   3   0   -3.20    2.30
 -12   3   0   -1.30    3.10
 -12   3   0   -3.10    2.10
 -12   3   0   -2.40    2.40
 -12   3   0    1.70    2.80
 -13  -3   0   56.29    6.70
 -13  -3   0   68.09    6.50
 -13  -3   0   70.69    6.90
 -13  -3   0   62.89   10.00
 -13  -3   0   65.79    8.70
 -13   3   0   46.40    7.90
 -13   3   0   69.29    8.30
 -13   3   0   53.29    6.00
 -13   3   0   62.29    5.20
  13   3   0   58.79    5.80
 -13   3   0   69.69    6.40
 -14  -3   0   12.80    6.00
 -14  -3   0    2.90    3.30
 -14  -3   0   -1.70    3.80
 -14  -3   0    2.20    3.60
 -14  -3   0    4.30    3.20
 -14   3   0   -5.00    4.70
 -14   3   0   -3.60    2.50
  14   3   0   -0.40    3.80
 -14   3   0   -0.50    4.20
 -15  -3   0    7.40    3.50
 -15  -3   0    1.90    6.20
 -15  -3   0    8.90    4.70
 -15   3   0    8.60    5.60
 -15   3   0   -0.30    5.70
 -15   3   0   10.00    4.30
   0  -4   0  943.81   24.80
   0  -4   0  932.31   26.00
   0  -4   0  932.01   24.00
   0  -4   0  896.61   26.40
   0   4   0  935.41   24.10
   0   4   0  943.41   25.50
   0   4   0  905.21   25.60
   0   4   0  946.51   26.20
   0   4   0  915.01   25.00
   0   4   0  923.51   24.60
   1  -4   0   39.90    5.00
   1  -4   0   41.80    4.50
  -1  -4   0   35.10    4.20
   1  -4   0   35.30    4.40
  -1  -4   0   43.80    3.90
  -1  -4   0   30.40    4.50
  -1  -4   0   28.70    4.60
   1  -4   0   38.50    3.30
  -1   4   0   37.30    4.90
   1   4   0   41.50    3.60
  -1   4   0   35.20    4.50
   1   4   0   42.80    3.90
   1   4   0   39.00    3.70
  -1   4   0   34.10    4.30
  -1   4   0   36.40    3.40
  -1   4   0   33.40    3.20
   1   4   0   32.30    4.40
   1   4   0   42.40    4.10
   1   4   0   38.30    4.80
   2  -4   0   16.30    3.60
  -2  -4   0   18.40    3.10
   2  -4   0   19.00    1.70
   2  -4   0   20.50    3.60
  -2  -4   0   21.00    3.50
   2  -4   0   19.30    1.70
  -2  -4   0   15.70    3.90
  -2  -4   0   13.70    3.10
   2  -4   0   20.00    2.90
   2  -4   0   19.00    3.50
   2   4   0   14.50    3.10
   2   4   0   21.10    3.30
  -2   4   0   14.80    3.00
  -2   4   0   19.30    3.70
   2   4   0   21.10    3.50
   2   4   0   14.60    2.80
  -2   4   0   19.00    3.00
   2   4   0   24.70    4.10
   2   4   0   18.80    4.00
  -3  -4   0   28.30    4.20
   3  -4   0   29.60    3.60
  -3  -4   0   32.90    4.80
  -3  -4   0   33.90    5.00
   3  -4   0   31.10    4.40
   3  -4   0   31.70    4.00
   3   4   0   31.20    4.40
   3   4   0   38.10    4.40
   3   4   0   32.70    4.20
  -3   4   0   34.00    4.50
   3   4   0   31.20    4.50
  -3   4   0   33.10    4.80
   3   4   0   32.40    4.60
   3   4   0   33.80    4.40
  -3   4   0   25.90    3.60
  -4  -4   0  330.47   12.40
   4  -4   0  348.57   12.60
  -4  -4   0  327.87   13.00
  -4  -4   0  338.47   14.00
  -4  -4   0  331.37   13.00
  -4  -4   0  338.17   12.30
   4  -4   0  335.37   12.10
   4   4   0  330.07   13.00
   4   4   0  333.37   12.90
   4   4   0  362.06   13.20
  -4   4   0  318.27   12.20
   4   4   0  362.96   13.50
   4   4   0  316.57   11.80
  -4   4   0  333.87   11.70
  -4   4   0  332.17   11.90
  -4   4   0  337.47   10.80
   4   4   0  338.37   12.20
  -5  -4   0   38.80    5.50
  -5  -4   0   43.10    4.90
  -5  -4   0   38.60    5.10
  -5  -4   0   51.99    6.20
  -5  -4   0   30.70    4.90
   5  -4   0   41.90    4.10
   5  -4   0   35.80    4.40
   5   4   0   39.70    5.50
   5   4   0   45.60    5.10
   5   4   0   41.60    5.20
   5   4   0   35.90    5.80
  -5   4   0   43.90    5.00
  -5   4   0   38.10    4.00
   5   4   0   38.40    5.00
   5   4   0   41.20    5.50
  -5   4   0   40.10    4.70
  -5   4   0   42.20    4.10
  -6  -4   0  237.58   11.90
  -6  -4   0  256.87   11.10
   6  -4   0  242.58    9.70
  -6  -4   0  229.18   11.10
  -6  -4   0  243.58   11.10
   6  -4   0  249.97    9.80
  -6  -4   0  252.57   12.00
  -6   4   0  256.87   12.20
  -6   4   0  225.88    9.30
   6   4   0  234.38    9.90
   6   4   0  261.07   11.20
   6   4   0  247.18   10.90
  -6   4   0  215.58    9.80
   6   4   0  233.08   10.40
  -6   4   0  252.37    9.40
   6   4   0  238.88   10.80
  -7  -4   0   13.00    4.20
   7  -4   0    3.50    2.90
   7  -4   0   12.10    2.90
  -7  -4   0    4.80    3.00
  -7  -4   0    5.70    3.20
  -7  -4   0   12.70    4.00
   7   4   0    9.70    3.10
   7   4   0   19.90    4.00
  -7   4   0    8.00    2.50
  -7   4   0    5.70    2.80
  -7   4   0   11.70    3.10
   7   4   0    8.40    3.30
   7   4   0    5.10    3.10
  -7   4   0    2.50    2.30
  -8  -4   0    5.70    3.90
  -8  -4   0    4.70    3.30
  -8  -4   0   10.00    3.50
  -8  -4   0    2.70    4.10
   8  -4   0    7.00    2.70
  -8  -4   0    3.10    3.30
   8   4   0    4.30    2.80
   8   4   0    2.20    2.80
  -8   4   0    3.50    2.30
  -8   4   0    1.70    2.80
  -8   4   0    4.30    2.70
   8   4   0    1.10    2.60
   9  -4   0   28.60    3.90
   9  -4   0   19.20    3.10
  -9  -4   0   40.20    6.30
  -9  -4   0   35.40    5.60
  -9  -4   0   21.80    5.20
  -9  -4   0   35.60    6.10
  -9  -4   0   37.10    5.60
  -9   4   0   26.20    4.20
   9   4   0   22.80    3.80
  -9   4   0   31.10    3.80
  -9   4   0   36.30    5.10
   9   4   0   24.80    3.70
 -10  -4   0   53.79    6.90
  10  -4   0   50.79    3.90
  10  -4   0   58.79    4.50
 -10  -4   0   52.29    6.70
 -10  -4   0   64.19    7.70
 -10  -4   0   61.49    7.40
 -10   4   0   53.09    4.20
 -10   4   0   50.39    4.60
 -10   4   0   54.69    6.50
 -10   4   0   50.89    3.10
 -10   4   0   54.49    2.80
  10   4   0   63.19    4.30
 -10   4   0   55.59    5.40
  10   4   0   57.79    6.60
 -11  -4   0    3.40    3.80
 -11  -4   0   -0.70    3.40
 -11  -4   0    0.30    3.60
 -11  -4   0    0.30    3.50
 -11  -4   0   -1.00    4.30
 -11   4   0    5.60    3.10
 -11   4   0    3.00    4.00
 -11   4   0    6.50    2.30
 -11   4   0    4.00    1.70
 -11   4   0    3.40    2.00
  11   4   0    3.30    3.00
 -11   4   0   -1.20    1.50
 -12  -4   0   75.99   10.60
 -12  -4   0   84.09    7.90
 -12  -4   0   86.29   10.00
 -12  -4   0   85.29    8.10
 -12  -4   0   68.99    9.00
 -12   4   0   85.09    3.70
 -12   4   0   79.79    9.50
 -12   4   0   74.69    4.40
  12   4   0   79.69    7.10
 -13  -4   0    0.60    4.00
 -13  -4   0    3.10    4.30
 -13  -4   0    9.80    4.10
 -13  -4   0   -9.40    4.10
 -13   4   0   -0.20    2.00
 -13   4   0   -6.90    4.50
  13   4   0   -3.70    3.20
 -13   4   0    2.80    3.00
 -14  -4   0   31.30    7.70
 -14  -4   0   21.70    6.10
 -14  -4   0   31.20    6.10
 -14   4   0   27.10    7.00
 -14   4   0   23.20    4.40
 -14   4   0   39.70    7.80
   0  -5   0    2.50    3.10
   0  -5   0    1.20    2.60
   0  -5   0    2.20    2.20
   0  -5   0    1.90    2.80
   0   5   0    2.90    2.10
   0   5   0    1.00    3.00
   0   5   0   -0.20    1.60
   0   5   0   -0.20    2.80
   0   5   0    0.90    2.10
   0   5   0   -0.70    1.60
   1  -5   0  429.46   16.50
  -1  -5   0  424.66   16.30
  -1  -5   0  427.66   15.00
  -1  -5   0  434.36   17.10
  -1  -5   0  442.76   14.40
   1  -5   0  454.55   14.00
   1  -5   0  426.16   14.80
   1  -5   0  423.76   17.70
   1   5   0  426.06   15.80
  -1   5   0  409.66   14.90
   1   5   0  437.66   14.70
  -1   5   0  440.56   14.00
   1   5   0  452.35   16.10
  -1   5   0  418.06   15.70
   1   5   0  444.86   16.70
  -1   5   0  428.26   16.30
  -1   5   0  463.55   15.90
   1   5   0  420.06   16.50
  -1   5   0  426.46   14.60
   2  -5   0  142.49    7.00
  -2  -5   0  139.29    8.80
   2  -5   0  137.79    5.20
  -2  -5   0  139.69    8.00
   2  -5   0  135.49    5.20
   2  -5   0  151.28    8.60
  -2  -5   0  150.38    9.50
   2  -5   0  134.19    7.80
   2  -5   0  147.99    9.00
   2   5   0  135.19    7.70
  -2   5   0  137.59    6.60
  -2   5   0  131.29    8.00
   2   5   0  146.59    8.70
   2   5   0  128.89    8.30
  -2   5   0  137.09    7.90
  -2   5   0  134.19    7.40
   2   5   0  142.09    8.60
  -2   5   0  137.39    8.70
   2   5   0  124.39    7.50
  -3  -5   0   48.30    5.70
   3  -5   0   43.50    6.00
  -3  -5   0   35.60    5.80
  -3  -5   0   45.20    5.40
   3  -5   0   34.70    4.70
   3  -5   0   44.90    4.80
  -3  -5   0   35.10    5.30
   3   5   0   34.10    4.80
  -3   5   0   41.00    5.20
   3   5   0   36.80    5.50
   3   5   0   43.10    5.60
   3   5   0   33.10    4.90
  -3   5   0   38.60    4.10
  -3   5   0   43.60    5.80
  -3   5   0   41.50    6.00
   3   5   0   36.20    5.20
   3   5   0   30.40    5.20
   4  -5   0  154.58    9.00
   4  -5   0  154.28    8.50
  -4  -5   0  163.28    9.00
  -4  -5   0  162.48    9.30
  -4  -5   0  191.08   11.10
  -4  -5   0  160.58    9.40
   4  -5   0  158.48    7.70
  -4   5   0  151.98    8.00
   4   5   0  156.78    8.30
   4   5   0  157.58    8.90
  -4   5   0  150.18    7.00
  -4   5   0  163.08    9.10
   4   5   0  146.29    8.50
  -4   5   0  160.78    8.60
  -4   5   0  145.99    8.20
   4   5   0  159.18    9.00
   4   5   0  132.59   10.10
   5  -5   0  368.96   14.20
  -5  -5   0  345.97   13.90
  -5  -5   0  323.17   14.80
  -5  -5   0  369.06   16.20
   5  -5   0  376.96   14.10
  -5  -5   0  368.96   14.70
  -5   5   0  375.26   14.50
   5   5   0  355.56   13.90
   5   5   0  361.96   15.90
  -5   5   0  348.17   13.70
   5   5   0  343.57   14.30
  -5   5   0  346.57   13.40
   5   5   0  374.46   14.70
  -5   5   0  341.57   11.80
  -5   5   0  370.76   13.50
   5   5   0  349.37   14.60
  -6  -5   0   -0.50    2.30
   6  -5   0   -1.10    2.40
   6  -5   0    4.40    2.60
  -6  -5   0    2.10    2.70
  -6  -5   0   -2.80    3.10
  -6  -5   0   -0.40    3.20
  -6  -5   0    0.50    3.20
  -6   5   0    1.70    2.20
   6   5   0    0.60    3.10
  -6   5   0    2.90    2.40
  -6   5   0    2.00    2.60
  -6   5   0   -5.60    2.80
  -6   5   0    2.70    2.30
   6   5   0   -0.20    2.80
  -7  -5   0  340.47   15.40
  -7  -5   0  342.87   14.50
  -7  -5   0  349.37   14.50
  -7  -5   0  334.77   15.00
  -7  -5   0  326.17   15.90
   7  -5   0  330.97   13.30
  -7   5   0  345.07   13.10
  -7   5   0  364.76   14.10
  -7   5   0  359.86   13.00
  -7   5   0  342.77   12.50
   7   5   0  352.06   15.00
   7   5   0  347.57   14.80
   8  -5   0   17.30    3.90
  -8  -5   0   20.10    4.90
  -8  -5   0   25.40    5.40
  -8  -5   0   23.60    5.40
  -8  -5   0   20.90    4.80
  -8  -5   0   16.70    5.60
  -8   5   0   24.80    4.90
   8   5   0   23.10    4.50
   8   5   0   28.70    5.10
  -8   5   0   28.60    4.10
   8   5   0   31.50    5.60
  -8   5   0   22.20    3.90
  -8   5   0   26.30    4.20
   9  -5   0    7.60    3.40
  -9  -5   0   12.00    4.80
  -9  -5   0   13.10    4.10
  -9  -5   0   11.50    4.70
  -9  -5   0   12.40    4.70
   9   5   0    5.30    3.70
   9   5   0   18.40    4.50
  -9   5   0    9.00    3.90
  -9   5   0   13.10    3.70
  -9   5   0    7.30    2.90
  -9   5   0    9.10    3.10
   9   5   0   10.20    3.60
 -10  -5   0   30.90    6.20
 -10  -5   0   36.20    7.00
 -10  -5   0   26.70    5.80
  10  -5   0   25.40    4.40
 -10  -5   0   30.40    7.40
 -10  -5   0   24.20    6.30
  10   5   0   30.40    4.50
  10   5   0   30.40    5.60
 -10   5   0   32.30    4.50
 -10   5   0   25.80    5.20
 -10   5   0   27.40    4.10
 -10   5   0   27.00    5.00
 -11  -5   0  186.68   11.90
 -11  -5   0  194.18   14.00
 -11  -5   0  195.68   12.20
 -11  -5   0  184.08   12.60
  11   5   0  181.48    9.60
 -11   5   0  158.48   10.20
 -11   5   0  197.38   11.20
 -12  -5   0   -0.60    4.40
 -12  -5   0   -4.20    3.80
 -12  -5   0   -2.30    4.10
 -12  -5   0   -8.20    3.60
 -12  -5   0    3.90    3.90
  12  -5   0    0.70    1.70
 -12   5   0    2.30    3.20
 -12   5   0   -0.60    2.10
  12   5   0   -3.90    3.60
 -12   5   0   -1.20    1.90
 -13  -5   0   24.00    6.70
 -13  -5   0    1.70    5.00
 -13  -5   0   10.50    5.00
 -13  -5   0   10.60    6.00
 -13   5   0    7.10    1.90
 -13   5   0    9.10    1.60
 -13   5   0    8.20    4.30
   0  -6   0  714.83   24.70
   0  -6   0  694.23   22.10
   0  -6   0  705.43   21.20
   0  -6   0  691.93   26.80
   0   6   0  720.83   24.00
   0   6   0  709.83   24.40
   0   6   0  667.43   21.00
   0   6   0  699.03   23.50
  -1  -6   0    5.90    3.30
  -1  -6   0    4.50    3.50
   1  -6   0    7.70    3.70
  -1  -6   0    9.10    3.80
   1  -6   0   12.60    2.70
  -1  -6   0    9.20    3.40
   1  -6   0    7.10    2.90
   1  -6   0    7.60    3.10
   1  -6   0    3.50    2.20
  -1   6   0    9.50    4.10
  -1   6   0    7.20    3.60
   1   6   0   10.30    3.40
   1   6   0    5.80    3.90
  -1   6   0    5.50    3.00
   1   6   0    7.20    3.60
  -1   6   0    4.30    3.40
   1   6   0    9.80    4.50
  -2  -6   0  163.48    9.10
   2  -6   0  154.38    8.90
   2  -6   0  164.78    6.30
  -2  -6   0  158.28   10.50
  -2  -6   0  170.88   11.00
  -2  -6   0  182.28    9.50
   2  -6   0  164.58    8.40
   2  -6   0  165.68    6.50
   2  -6   0  179.48   13.20
   2   6   0  176.38   11.10
   2   6   0  150.78   10.00
  -2   6   0  171.58   10.30
  -2   6   0  178.38   10.20
   2   6   0  168.28   10.50
   2   6   0  156.98   10.40
  -2   6   0  166.68    8.10
  -2   6   0  191.98   10.00
   3  -6   0  156.78    4.60
  -3  -6   0  157.08    9.40
  -3  -6   0  166.08   11.50
  -3  -6   0  155.18    9.50
   3  -6   0  169.28    8.40
   3  -6   0  172.48   10.30
  -3  -6   0  165.08   10.80
  -3   6   0  156.38    9.60
   3   6   0  163.58   10.30
  -3   6   0  158.78   10.40
   3   6   0  153.68    9.40
   3   6   0  157.98   10.30
  -3   6   0  150.68    7.80
  -3   6   0  177.48    9.90
  -4  -6   0  166.58   10.10
  -4  -6   0  166.98   10.10
   4  -6   0  166.58   10.00
  -4  -6   0  171.48   10.60
  -4  -6   0  167.38   11.80
   4  -6   0  172.78    8.70
  -4   6   0  172.38    9.70
  -4   6   0  165.38    9.80
   4   6   0  189.68   11.20
  -4   6   0  184.08   10.90
   4   6   0  164.18   11.70
   4   6   0  187.48   11.00
   4   6   0  170.48   10.30
  -4   6   0  162.08    8.00
  -5  -6   0   15.20    4.80
  -5  -6   0   12.30    3.80
  -5  -6   0    6.10    3.40
   5  -6   0   11.30    4.30
  -5  -6   0    6.70    3.40
  -5   6   0   15.70    4.70
  -5   6   0   18.10    4.30
  -5   6   0   10.30    3.70
  -5   6   0   10.00    3.00
   5   6   0   16.50    5.30
   5   6   0   13.10    4.80
  -6  -6   0  246.28   14.00
  -6  -6   0  255.57   12.90
  -6  -6   0  225.08   13.20
   6  -6   0  241.78   12.20
  -6  -6   0  246.28   12.90
  -6   6   0  250.27   11.50
   6   6   0  232.58   12.40
   6   6   0  248.08   13.30
  -6   6   0  231.98   11.40
  -6   6   0  240.68   12.50
  -6   6   0  239.28    9.90
   7  -6   0  130.79    8.70
  -7  -6   0  125.99    9.60
  -7  -6   0  129.19   10.50
  -7  -6   0  130.29    9.70
  -7   6   0  108.39    8.00
  -7   6   0  115.89    7.10
  -7   6   0  125.79    9.10
   7   6   0  123.09    9.80
   7   6   0  114.29    9.30
  -8  -6   0   15.70    4.60
  -8  -6   0   23.00    6.00
   8  -6   0   20.30    4.80
  -8  -6   0   15.70    6.10
  -8  -6   0   18.60    5.30
  -8   6   0   11.00    3.70
  -8   6   0   17.80    4.30
  -8   6   0   12.30    4.30
   8   6   0   19.20    5.40
   8   6   0   13.30    4.60
  -8   6   0   12.40    3.90
  -9  -6   0   23.00    6.50
   9  -6   0   20.40    4.60
  -9  -6   0   14.80    5.60
  -9  -6   0   13.60    5.80
  -9  -6   0    8.70    5.60
  -9   6   0   22.10    5.20
   9   6   0   15.90    4.60
  -9   6   0   15.10    4.00
   9   6   0   15.70    5.20
  -9   6   0   13.90    4.10
  -9   6   0   19.60    4.20
 -10  -6   0    4.50    5.20
  10  -6   0   10.40    4.00
 -10  -6   0    5.40    4.70
 -10  -6   0    4.10    5.30
 -10  -6   0    9.90    5.90
 -10   6   0    5.00    3.40
 -10   6   0   -1.20    3.20
  10   6   0    8.20    4.60
 -10   6   0    0.10    3.30
  10   6   0    5.10    4.40
 -10   6   0    1.90    3.00
  10   6   0    5.10    4.30
 -11  -6   0    2.20    4.50
 -11  -6   0    2.00    4.00
  11  -6   0    3.20    3.50
 -11  -6   0   -3.50    4.60
 -11  -6   0    3.10    5.20
 -11   6   0   -3.00    3.40
 -11   6   0    4.10    4.10
 -11   6   0    5.00    3.20
  11   6   0    7.60    4.80
  11   6   0    4.40    4.40
  11   6   0   -3.60    4.10
 -12  -6   0   61.79   10.60
 -12  -6   0   69.49    8.90
 -12  -6   0   60.49    9.40
 -12   6   0   62.39    7.70
   0  -7   0   -0.20    3.70
   0  -7   0    3.20    2.90
   0  -7   0    0.50    2.50
   0  -7   0   -6.20    3.90
   0  -7   0   -0.20    3.10
   0   7   0    0.60    4.20
   0   7   0   -3.50    2.40
   0   7   0    4.00    3.50
   0   7   0   -2.90    2.60
  -1  -7   0  140.09    9.10
   1  -7   0  124.79    8.70
   1  -7   0  124.69    6.70
   1  -7   0  139.49   11.20
  -1  -7   0  123.29    8.30
   1  -7   0  138.79    7.00
   1  -7   0  130.99    8.50
  -1  -7   0  136.09   11.50
   1   7   0  130.09    9.90
   1   7   0  114.89    9.90
   1   7   0  110.89    9.50
  -1   7   0  143.19    9.60
  -1   7   0  142.09    8.30
   1   7   0  125.29    8.50
  -1   7   0  145.69   10.20
  -1   7   0  122.39   10.40
   2  -7   0  126.29   12.60
  -2  -7   0  125.99    8.70
  -2  -7   0  105.29    8.10
  -2  -7   0  115.49   10.10
   2  -7   0  120.89    7.80
   2  -7   0  129.99    5.80
  -2   7   0  134.49   10.50
  -2   7   0  117.19    7.50
  -2   7   0  118.89    8.80
   2   7   0   93.09    9.50
   2   7   0  122.19   10.00
  -2   7   0  127.69    9.50
   2   7   0  120.59   10.40
   2   7   0  141.59    9.90
  -3  -7   0   21.20    5.10
   3  -7   0   23.90    5.40
   3  -7   0   17.50    4.50
  -3  -7   0   30.00    5.30
  -3  -7   0   23.10    6.70
   3  -7   0   21.90    1.60
  -3   7   0   19.40    5.60
   3   7   0   17.60    5.90
  -3   7   0   22.40    4.30
   3   7   0   26.30    7.50
  -3   7   0   18.40    5.10
  -3   7   0   13.70    4.90
  -4  -7   0   12.10    4.60
  -4  -7   0    7.40    4.40
   4  -7   0    9.30    3.80
   4  -7   0   13.80    5.20
   4   7   0    4.50    4.70
  -4   7   0    9.40    3.40
  -4   7   0    6.40    3.90
   4   7   0    8.80    5.30
  -4   7   0    7.00    4.80
  -4   7   0   14.00    4.70
  -5  -7   0  149.69   10.00
   5  -7   0  125.89   11.80
  -5  -7   0  171.98   11.20
  -5  -7   0  156.48   11.80
  -5   7   0  144.59    8.10
   5   7   0  161.08   11.60
  -5   7   0  114.49    9.30
   5   7   0  123.69   10.90
  -5   7   0  146.49    9.90
  -5   7   0  136.79   10.60
   6  -7   0   -1.90    3.80
  -6  -7   0   -2.70    4.20
  -6  -7   0    0.00    3.50
  -6   7   0    2.20    3.60
  -6   7   0    4.80    4.40
  -6   7   0    2.10    3.40
  -6   7   0    0.40    2.90
   6   7   0   -2.50    5.10
   6   7   0    6.20    4.90
  -7  -7   0   82.59    9.80
  -7  -7   0   80.39    8.90
  -7  -7   0   96.49   11.30
   7  -7   0   92.89    8.70
  -7   7   0  101.09    9.30
  -7   7   0   93.69    8.00
   7   7   0   90.69   10.20
  -7   7   0  105.89    8.60
  -7   7   0   96.89    6.70
   7   7   0   91.79   10.40
   8  -7   0   13.50    5.20
  -8  -7   0   18.70    5.70
  -8  -7   0   26.10    5.60
  -8  -7   0   19.30    7.00
  -8   7   0   13.50    4.90
  -8   7   0   19.80    4.90
  -8   7   0   17.10    4.10
   8   7   0   13.00    5.70
  -9  -7   0    2.90    5.80
   9  -7   0   -1.70    3.90
  -9  -7   0    5.70    5.50
  -9  -7   0    0.70    5.30
  -9   7   0   -1.40    3.20
  -9   7   0   -2.00    3.30
   9   7   0    3.70    5.20
  -9   7   0    2.40    4.50
   9   7   0    4.90    4.40
 -10  -7   0   24.40    6.60
  10  -7   0   27.70    5.90
 -10  -7   0   25.10    7.00
 -10  -7   0   39.60    8.30
  10   7   0   47.80    8.50
 -10   7   0   30.10    5.50
 -10   7   0   13.70    4.60
  10   7   0   40.60    7.10
 -11  -7   0   -1.70    6.00
 -11  -7   0   14.50    6.00
 -11  -7   0    1.30    6.50
  11   7   0   11.90    5.30
 -11   7   0   12.40    5.80
 -11   7   0    8.40    5.10
   0  -8   0  228.48   10.90
   0  -8   0  239.48   11.00
   0  -8   0  228.88   15.10
   0  -8   0  244.98   12.10
   0  -8   0  259.87   13.40
   0   8   0  232.58   14.40
   0   8   0  226.78   15.00
   0   8   0  261.97   14.60
   1  -8   0  101.69    8.30
   1  -8   0  103.89    8.70
  -1  -8   0   74.19   10.00
  -1  -8   0   91.39    7.60
  -1  -8   0   82.09    7.70
   1  -8   0   84.29   10.40
  -1  -8   0   96.99    8.90
   1  -8   0   95.59    6.40
  -1  -8   0  107.59    8.80
   1   8   0   79.49    9.30
  -1   8   0   90.69    8.80
   1   8   0   79.79   10.40
  -1   8   0   76.49    8.20
   1   8   0   82.39   10.10
  -1   8   0  100.09   11.60
  -2  -8   0   31.70    8.30
   2  -8   0   43.90    6.50
   2  -8   0   44.30    8.50
  -2  -8   0   44.90    7.00
   2  -8   0   44.70    3.90
  -2  -8   0   45.00    6.80
  -2  -8   0   50.09    7.10
   2   8   0   48.90    8.40
   2   8   0   48.80    8.00
  -2   8   0   36.90    8.00
  -2   8   0   45.30    7.80
  -2   8   0   29.20    6.70
  -2   8   0   51.19    6.50
   3  -8   0  185.48   12.90
  -3  -8   0  214.48   12.20
  -3  -8   0  193.58   11.80
   3  -8   0  216.68   13.00
  -3  -8   0  190.78   12.30
  -3  -8   0  187.88   13.90
  -3   8   0  208.58   13.10
  -3   8   0  197.78   12.70
  -3   8   0  184.68   13.50
  -3   8   0  192.08   10.30
   3   8   0  186.38   13.20
   3   8   0  208.18   14.50
   4  -8   0   21.60    6.60
  -4  -8   0   23.80    6.20
   4  -8   0   28.60    5.90
  -4  -8   0   29.60    8.20
  -4   8   0   22.80    5.70
   4   8   0   12.40    6.20
  -4   8   0   22.50    4.70
  -4   8   0   20.90    5.40
   4   8   0   12.40    5.30
  -4   8   0   18.30    6.60
   5  -8   0   22.30    8.00
  -5  -8   0   16.40    7.30
  -5  -8   0   19.20    5.90
  -5  -8   0   11.40    5.60
   5   8   0   25.20    6.40
  -5   8   0   24.30    6.10
  -5   8   0   32.60    6.30
  -5   8   0   28.60    7.30
   5   8   0   20.00    6.90
  -6  -8   0   70.79    8.80
  -6  -8   0   71.19   10.90
  -6  -8   0   89.39   10.30
   6  -8   0   75.19    9.80
  -6   8   0   87.99   10.50
   6   8   0   86.49   10.40
   6   8   0   78.99   10.60
  -6   8   0   83.49    9.10
  -6   8   0   83.19    9.50
  -7  -8   0   30.30    7.30
  -7  -8   0   28.00    6.30
  -7  -8   0   25.00    8.00
   7  -8   0   15.60    5.70
  -7   8   0   28.60    6.00
   7   8   0   20.60    6.50
  -7   8   0   24.40    6.50
  -7   8   0   29.40    6.40
  -8  -8   0   30.10    7.50
  -8  -8   0   26.10    8.20
  -8  -8   0   21.60    5.70
   8  -8   0   30.60    7.20
  -8   8   0   22.80    7.00
   8   8   0   34.60    7.60
  -8   8   0   22.30    5.50
   8   8   0   16.60    6.80
   9  -8   0   29.70    7.00
  -9  -8   0   33.70    7.20
  -9  -8   0   24.70    6.60
  -9  -8   0   32.80    8.40
  -9   8   0   34.70    6.50
  -9   8   0   21.60    6.30
   9   8   0   37.90    8.10
   9   8   0   35.10    8.10
   0  -9   0   -0.70    5.70
   0  -9   0    1.30    3.10
   0  -9   0   -6.50    4.40
   0  -9   0    3.70    4.10
   0   9   0    0.40    4.00
   0   9   0    6.30    4.30
   1  -9   0   51.29    7.30
   1  -9   0   39.10    5.40
   1  -9   0   44.60    8.40
  -1  -9   0   53.09    7.50
  -1  -9   0   63.09   10.60
  -1  -9   0   52.99    8.50
   1  -9   0   45.40    5.20
  -1   9   0   62.09    9.50
   1   9   0   42.20    8.70
  -1   9   0   47.50    8.30
   1   9   0   59.09    9.60
  -1   9   0   48.90    9.40
   2  -9   0   32.10    5.90
  -2  -9   0   30.50    6.30
  -2  -9   0   31.80    6.40
   2  -9   0   26.00    3.30
   2  -9   0   32.00    7.50
  -2  -9   0   35.00    6.70
  -2  -9   0   35.40    8.30
  -2   9   0   34.60    8.70
   2   9   0   31.90    6.60
  -2   9   0   38.30    7.90
   2   9   0   39.10    8.90
  -2   9   0   37.10    7.80
   3  -9   0    7.80    4.40
  -3  -9   0    8.00    4.60
   3  -9   0   12.30    6.40
  -3  -9   0    5.20    5.90
  -3  -9   0   -0.50    6.00
  -3  -9   0   10.00    5.10
  -3   9   0    9.70    5.50
  -3   9   0   -0.50    4.50
   3   9   0    1.60    5.80
  -3   9   0    8.50    4.90
   4  -9   0   79.19   10.90
   4  -9   0  102.89    8.40
  -4  -9   0   74.09    9.50
  -4  -9   0   82.69   12.40
  -4  -9   0   92.69   10.30
  -4  -9   0   76.49    9.60
   4   9   0   96.69   11.60
  -4   9   0  103.99    9.60
   4   9   0  101.99   12.40
  -4   9   0  126.69   12.30
   5  -9   0   45.90    8.90
  -5  -9   0   20.80    7.20
  -5  -9   0   44.70    9.10
  -5  -9   0   33.60    7.20
  -5  -9   0   39.90    7.70
  -5   9   0   38.30    8.30
  -5   9   0   31.70    7.30
   5   9   0   47.40    9.70
   5   9   0   28.70    7.50
  -6  -9   0   14.50    6.70
   6  -9   0   -6.90    5.70
  -6  -9   0    0.80    5.00
  -6  -9   0   -1.70    5.20
   6   9   0    7.70    6.80
   6   9   0   -5.50    5.20
  -6   9   0    0.20    5.40
  -7  -9   0   82.99   11.60
  -7  -9   0   86.49   11.20
  -7  -9   0   83.69   11.50
  -7  -9   0   73.09   11.90
   7  -9   0   90.19   11.80
   7   9   0   99.39   12.60
  -7   9   0   86.99   11.40
   7   9   0  105.79   12.20
  -7   9   0  101.39    9.90
   0 -10   0   73.69    9.90
   0 -10   0   80.69    9.70
   0 -10   0   77.29   12.50
   0 -10   0   99.09    7.90
   0  10   0   70.59   10.70
   0  10   0   63.59   10.60
   1 -10   0   15.80    8.10
  -1 -10   0   -6.80    4.20
  -1 -10   0   10.10    5.10
  -1 -10   0    5.10    4.10
  -1 -10   0   -2.30    5.20
   1  10   0    8.10    5.50
  -1  10   0    6.60    6.50
  -1  10   0   17.30    7.40
   1  10   0    7.70    5.00
 -16   0   1    4.10    5.80
 -16   0   1   -4.50    4.40
 -16   0   1    2.70    2.80
 -16   0   1    3.10    5.20
 -15   0   1   55.59    8.90
 -15   0   1   78.39   10.10
 -15   0   1   73.39    5.50
 -14   0   1    4.00    5.00
 -14   0   1    2.10    3.90
 -14   0   1   -0.80    2.20
 -13   0   1   15.60    4.40
 -13   0   1   25.70    6.90
 -13   0   1   14.60    5.20
 -13   0   1   22.10    3.20
 -12   0   1    3.80    4.30
 -12   0   1   -1.00    1.60
 -12   0   1    1.70    2.80
 -12   0   1   -2.60    3.40
 -11   0   1  135.59    5.70
 -11   0   1  133.59    9.70
 -11   0   1  142.59    8.40
 -10   0   1    3.10    2.70
 -10   0   1    0.70    1.40
  -9   0   1  589.84   19.80
  -9   0   1  587.14   13.40
  -9   0   1  589.64   13.50
  -9   0   1  593.34   18.50
  -9   0   1  584.54   14.70
  -8   0   1    1.60    3.10
  -8   0   1    0.30    2.30
  -8   0   1   -0.10    0.80
  -8   0   1   -0.10    1.00
  -8   0   1    0.50    0.80
  -8   0   1   -0.40    0.80
  -7   0   1  621.44   15.00
  -7   0   1  620.84   19.00
  -7   0   1  648.04   15.00
  -7   0   1  642.24   14.70
  -7   0   1  641.44   15.10
  -7   0   1  665.83   18.40
  -6   0   1   -0.40    0.70
   6   0  -1    0.00    0.40
  -6   0   1    0.40    0.70
   6   0  -1    0.50    0.40
  -6   0   1    0.90    1.90
  -6   0   1   -0.10    1.60
   5   0  -1 1534.15   33.20
  -5   0   1 1546.35   36.10
  -5   0   1 1547.05   33.80
   5   0  -1 1508.65   33.30
  -4   0   1    0.30    0.50
   4   0  -1   -0.60    0.30
   4   0  -1   -0.30    0.30
  -4   0   1   -0.30    0.50
  -4   0   1    0.50    1.10
  -4   0   1    0.70    1.30
   3   0  -1 9999.00  219.88
   3   0  -1 9985.20  218.08
   2   0  -1    0.30    0.30
  -2   0   1    1.00    0.80
  -2   0   1    0.00    0.30
   2   0  -1    0.10    0.50
   2   0  -1   -1.80    0.60
  -2   0   1    0.10    0.50
   2   0  -1    0.70    0.40
  -2   0   1    0.10    0.40
  -1   0   1   40.40    1.60
   1   0  -1   45.60    1.70
  -1   0   1   39.50    2.40
  -1   0   1   43.60    1.60
  -1   0   1   40.90    1.60
   1   0  -1   44.70    1.40
   1   0  -1   48.20    2.10
  -1   0   1   40.30    1.60
   1   0  -1   39.50    2.20
   1   0   1  808.22   18.50
   2   0   1   -0.40    0.70
   2   0   1    0.70    0.80
  -2   0  -1    0.60    1.00
  -2   0  -1    0.40    0.90
  -2   0  -1    1.00    0.80
  -2   0  -1    0.50    0.80
  -2   0  -1    0.60    0.80
   2   0   1   -0.10    0.60
  -3   0  -1  128.09    5.20
   3   0   1  119.09    4.20
  -3   0  -1  115.89    4.40
   3   0   1  115.49    3.50
  -3   0  -1  125.79    4.20
  -3   0  -1  123.89    4.20
   3   0   1  120.89    4.30
   4   0   1   -0.20    0.90
  -4   0  -1    0.40    0.90
  -4   0  -1    1.20    1.30
  -4   0  -1   -0.90    0.80
   4   0   1    0.40    1.00
  -4   0  -1   -1.80    0.90
  -5   0  -1   11.80    1.80
   5   0   1    9.50    1.70
  -5   0  -1   13.80    2.00
  -5   0  -1   11.10    2.30
   5   0   1   11.10    1.70
  -5   0  -1   11.00    1.70
  -6   0  -1   -1.20    1.10
  -6   0  -1   -1.10    1.30
   6   0   1   -0.30    1.00
  -6   0  -1    0.70    1.20
  -6   0  -1    0.60    1.60
  -7   0  -1  609.34   17.70
   7   0   1  639.04   16.30
  -7   0  -1  641.64   16.90
  -7   0  -1  624.74   17.20
  -7   0  -1  659.53   21.10
   8   0   1    2.80    1.40
   8   0   1    0.50    1.30
  -8   0  -1    1.20    1.70
  -8   0  -1   -0.40    1.70
  -8   0  -1    2.00    2.90
  -8   0  -1   -0.80    1.40
  -9   0  -1  129.19    8.40
  -9   0  -1  128.19    5.70
   9   0   1  123.89    5.50
   9   0   1  126.79    5.10
  -9   0  -1  113.29    5.90
  -9   0  -1  122.99    6.10
 -10   0  -1   -1.00    1.60
 -10   0  -1   -2.50    3.40
 -10   0  -1    4.00    3.60
  10   0   1   -1.40    1.20
 -10   0  -1    2.90    2.30
  10   0   1    1.00    1.60
 -10   0  -1   -0.20    1.90
 -11   0  -1   -0.30    2.30
 -11   0  -1   -2.40    1.50
 -11   0  -1    0.20    3.80
 -11   0  -1   -0.50    1.50
  11   0   1    0.50    0.90
 -11   0  -1   -2.20    3.80
 -12   0  -1    0.50    1.50
 -12   0  -1    4.00    4.40
 -12   0  -1    2.60    2.70
 -12   0  -1    6.50    4.80
 -13   0  -1   34.40    6.80
 -13   0  -1   27.60    1.90
 -13   0  -1   24.00    6.60
 -14   0  -1    1.80    3.50
 -14   0  -1    0.00    2.90
 -14   0  -1    1.00    4.90
 -15   0  -1   21.20    7.60
 -15   0  -1   35.00    7.70
 -15   0  -1   28.60    5.40
 -16  -1   1   48.40    9.20
 -16  -1   1   49.80    8.20
 -16  -1   1   50.89    5.80
 -16  -1   1   52.19    9.10
 -16   1   1   40.80    7.60
 -16   1   1   42.30    7.60
 -16   1   1   35.30    7.70
 -15  -1   1    3.90    4.50
 -15  -1   1    9.30    3.60
 -15  -1   1   -3.70    4.30
 -15  -1   1   -0.70    3.30
 -15   1   1   -0.10    2.20
 -15   1   1    6.20    5.10
 -15   1   1    1.50    4.50
 -14  -1   1   80.49   10.30
 -14  -1   1   88.49    6.30
 -14  -1   1   77.79    9.40
 -14  -1   1   96.79    8.90
 -14   1   1   92.79    9.20
 -14   1   1   74.99    4.80
 -14   1   1   86.99   10.00
 -14   1   1   95.59    8.90
 -13  -1   1   11.50    5.00
 -13  -1   1   12.30    5.50
 -13  -1   1    7.90    3.80
 -13  -1   1   18.30    3.60
 -13   1   1    6.10    4.60
 -13   1   1   11.90    4.90
 -13   1   1    9.00    2.40
 -13   1   1   17.80    5.10
 -12  -1   1   41.90    6.40
 -12  -1   1   48.40    7.90
 -12  -1   1   47.50    3.10
 -12  -1   1   53.69    4.70
 -12  -1   1   37.40    3.10
 -12   1   1   34.00    5.80
 -12   1   1   44.80    3.60
 -12   1   1   51.89    6.90
 -12   1   1   43.70    6.70
 -11  -1   1   -0.20    2.00
 -11  -1   1    1.50    1.80
 -11  -1   1    5.40    3.60
 -11  -1   1    0.90    1.70
 -11  -1   1   -2.10    3.20
 -11   1   1    4.40    1.60
  11   1  -1    3.30    1.00
 -11   1   1   -3.80    3.40
 -11   1   1    6.90    3.80
  11   1  -1    2.50    1.10
 -11   1   1   -0.60    2.90
 -10  -1   1  643.84   20.70
 -10  -1   1  660.43   22.70
 -10  -1   1  646.74   17.40
 -10  -1   1  643.24   17.70
 -10   1   1  651.43   20.90
 -10   1   1  639.94   15.60
 -10   1   1  697.93   22.00
  10   1  -1  630.34   15.90
  -9  -1   1   17.10    2.60
  -9  -1   1   12.70    3.60
  -9  -1   1   21.60    2.60
  -9  -1   1   14.30    2.40
   9   1  -1   16.20    1.90
  -9   1   1    8.80    3.50
  -9   1   1   14.90    1.30
  -9   1   1   18.60    4.00
  -8  -1   1   86.39    4.60
  -8  -1   1   88.09    4.40
  -8  -1   1   83.09    6.30
  -8  -1   1   83.89    4.30
  -8  -1   1   86.89    4.60
   8   1  -1   82.89    3.80
  -8   1   1   82.39    6.00
   8   1  -1   95.19    4.00
  -8   1   1   99.19    6.30
   8   1  -1   93.49    6.20
  -7  -1   1  278.67    8.70
  -7  -1   1  264.97    8.80
  -7  -1   1  279.67    8.40
  -7  -1   1  272.67   10.10
  -7  -1   1  249.28   10.80
  -7  -1   1  277.27    8.70
  -7   1   1  279.77   10.30
   7   1  -1  259.47   10.20
   7   1  -1  275.57    8.10
   7   1  -1  272.67    8.10
  -6  -1   1  338.17   11.00
  -6  -1   1  326.07    9.90
  -6  -1   1  333.87    9.40
  -6  -1   1  333.37   12.00
  -6  -1   1  337.27    9.80
  -6  -1   1  323.97    9.60
  -6   1   1  330.17   11.00
   6   1  -1  321.77    9.30
   6   1  -1  328.77   10.90
   6   1  -1  333.67    9.40
  -5  -1   1    9.80    1.60
  -5  -1   1    8.90    1.80
  -5  -1   1    7.90    2.00
  -5  -1   1   10.20    2.60
  -5  -1   1   10.50    1.70
  -5  -1   1   10.10    1.70
   5   1  -1   12.70    1.80
   5   1  -1   10.70    1.60
   5   1  -1   10.10    2.20
  -5   1   1    8.80    1.90
  -5   1   1   10.50    0.70
  -4  -1   1  263.57    8.90
  -4  -1   1  260.97    7.60
  -4  -1   1  252.97    7.70
  -4  -1   1  248.88    7.20
  -4  -1   1  256.57    8.10
  -4  -1   1  261.27    7.90
   4  -1  -1  257.87    6.10
   4  -1  -1  259.87    6.10
   4   1  -1  253.87    6.40
  -4   1   1  250.07    6.10
   4   1  -1  250.77    7.40
   4   1  -1  254.57    8.10
  -4   1   1  257.97    7.70
  -3  -1   1   54.39    2.80
  -3  -1   1   53.69    2.70
  -3  -1   1   49.00    3.40
  -3  -1   1   54.19    2.80
  -3  -1   1   50.69    2.70
   3  -1  -1   54.09    2.00
   3  -1  -1   54.99    2.10
  -3  -1   1   55.29    2.60
  -3  -1   1   53.09    3.00
  -3   1   1   53.29    2.50
   3   1  -1   56.09    2.80
   3   1  -1   58.59    3.30
  -3   1   1   55.49    2.00
   3   1  -1   51.09    2.30
   3   1  -1   52.79    2.80
   3   1  -1   52.89    2.50
  -3   1   1   54.29    2.00
  -2  -1   1  423.06   10.70
  -2  -1   1  425.26   10.60
   2  -1  -1  409.36   10.00
   2  -1  -1  419.26   10.20
  -2  -1   1  418.66   10.80
  -2  -1   1  425.06   11.20
  -2  -1   1  425.26   11.30
  -2  -1   1  424.86   10.80
  -2   1   1  415.46   10.10
   2   1  -1  407.26   10.40
   2   1  -1  406.86   10.60
  -2   1   1  415.46   10.20
   2   1  -1  403.06   11.00
  -2   1   1  423.46   10.10
   2   1  -1  432.06   11.40
   2   1  -1  426.16   10.70
  -1  -1   1  248.38    7.00
   1  -1  -1  238.88    6.30
  -1  -1   1  240.78    6.80
  -1  -1   1  233.98    7.10
   1  -1  -1  233.18    6.60
  -1  -1   1  236.78    6.90
  -1  -1   1  239.78    6.50
   1  -1  -1  235.58    6.10
  -1  -1   1  249.97    7.00
   1   1  -1  245.08    6.90
  -1   1   1  237.08    6.20
  -1   1   1  243.88    6.70
   1   1  -1  236.08    6.50
   1   1  -1  244.68    6.90
   1   1  -1  242.48    7.10
  -1   1   1  239.48    6.50
   1   1  -1  246.88    6.80
  -1   1   1  241.68    6.10
  -1   1   1  245.98    6.40
   0  -1  -1    4.90    0.80
   0  -1   1    8.90    1.40
   0  -1   1    6.80    1.00
   0  -1  -1    7.00    1.10
   0  -1  -1    5.00    1.10
   0  -1   1    6.30    1.10
   0  -1   1    5.50    1.10
   0  -1  -1    7.60    1.10
   0  -1   1    8.60    1.20
   0  -1  -1    7.50    1.20
   0  -1  -1    7.80    0.90
   0   1   1    6.00    1.10
   0   1   1    7.50    1.10
   0   1  -1    7.10    1.00
   0   1   1    5.90    1.00
   0   1   1    8.10    1.10
   0   1  -1    6.80    0.90
   0   1  -1    8.60    1.30
   0   1  -1    6.70    1.20
   0   1   1    6.40    1.10
   0   1  -1    5.30    1.20
   0   1  -1    5.00    1.10
  -1  -1  -1   86.99    3.50
   1  -1   1   89.59    3.70
   1  -1   1   96.69    3.00
  -1  -1  -1   93.39    3.50
  -1  -1  -1   83.09    3.60
   1  -1   1   97.49    3.40
   1  -1   1   96.99    3.50
  -1  -1  -1  100.79    3.80
   1   1   1   92.29    3.50
  -1   1  -1   89.59    2.90
  -1   1  -1   97.69    3.60
   1   1   1   90.69    3.70
  -1   1  -1   92.69    3.40
  -1   1  -1   93.99    3.60
   1   1   1   94.09    3.90
  -1   1  -1   94.99    3.70
   1   1   1   93.99    3.60
   2  -1   1 2269.07   67.99
  -2  -1  -1 2286.47   66.79
  -2   1  -1 2229.48   67.79
   3  -1   1 1169.58   26.50
  -3  -1  -1 1208.08   28.30
   3  -1   1 1212.28   27.30
  -3  -1  -1 1211.08   28.70
   3  -1   1 1231.98   28.10
  -3  -1  -1 1192.48   28.00
  -3  -1  -1 1177.48   28.40
   3   1   1 1194.48   27.80
  -3   1  -1 1179.78   27.80
   3   1   1 1208.18   28.60
  -3   1  -1 1181.18   27.40
   3   1   1 1209.88   28.50
   3   1   1 1180.68   28.00
  -3   1  -1 1180.88   27.50
   3   1   1 1173.38   28.00
  -4  -1  -1  506.95   14.00
   4  -1   1  477.85   12.20
  -4  -1  -1  470.95   13.20
  -4  -1  -1  473.75   13.00
   4  -1   1  461.45   13.10
  -4  -1  -1  490.65   13.40
   4   1   1  488.55   13.50
   4   1   1  483.95   13.00
  -4   1  -1  501.25   13.10
   4   1   1  470.95   12.50
   4   1   1  477.85   12.60
   4   1   1  487.25   13.90
  -4   1  -1  488.25   12.20
  -4   1  -1  478.55   12.70
  -4   1  -1  497.85   12.60
   5  -1   1    2.60    1.00
  -5  -1  -1   -2.80    1.70
  -5  -1  -1    4.20    1.70
  -5  -1  -1    2.40    1.50
  -5  -1  -1    1.70    1.50
   5   1   1    2.60    1.50
   5   1   1    1.60    1.10
   5   1   1    3.00    1.20
   5   1   1    0.30    1.10
  -5   1  -1    0.90    1.20
   5   1   1    1.80    1.40
  -5   1  -1    2.70    1.30
  -5   1  -1    0.90    1.10
  -6  -1  -1  266.67   10.30
   6  -1   1  259.37    7.60
  -6  -1  -1  263.07    9.10
  -6  -1  -1  267.37   10.80
  -6  -1  -1  267.27    8.90
  -6  -1  -1  281.37    9.10
   6   1   1  258.47   10.00
  -6   1  -1  260.47   10.20
   6   1   1  261.87    8.60
  -6   1  -1  282.17    8.20
  -6   1  -1  256.87    7.90
  -6   1  -1  273.77    8.40
  -7  -1  -1   22.20    3.10
   7  -1   1   20.90    1.90
  -7  -1  -1   21.00    4.40
   7  -1   1   24.00    2.50
  -7  -1  -1   25.40    3.20
  -7  -1  -1   28.00    4.30
  -7  -1  -1   20.70    2.90
  -7   1  -1   24.30    2.70
  -7   1  -1   24.60    2.60
   7   1   1   30.00    4.10
  -7   1  -1   24.30    2.90
   7   1   1   28.90    3.10
   7   1   1   24.20    3.20
  -8  -1  -1  316.07   10.80
   8  -1   1  315.77    9.40
  -8  -1  -1  340.57   12.80
  -8  -1  -1  315.27   10.90
  -8  -1  -1  332.67   14.00
   8  -1   1  323.47    8.70
  -8  -1  -1  321.67   10.80
  -8   1  -1  310.27    9.70
  -8   1  -1  323.87    9.50
  -8   1  -1  309.77   12.90
   8   1   1  317.17   10.80
  -9  -1  -1    2.30    3.40
  -9  -1  -1   -0.90    1.80
   9  -1   1    1.00    1.30
  -9  -1  -1   -2.00    2.20
  -9  -1  -1    2.80    2.10
  -9  -1  -1   -1.90    1.90
  -9   1  -1    0.00    1.70
  -9   1  -1   -0.50    3.10
   9   1   1    0.70    1.70
   9   1   1   -1.10    1.70
  -9   1  -1   -1.50    1.30
  -9   1  -1    0.30    1.40
 -10  -1  -1   16.40    3.10
 -10  -1  -1   16.50    3.30
  10  -1   1   16.00    1.30
 -10  -1  -1   18.50    4.60
 -10  -1  -1   12.70    3.00
  10  -1   1   12.40    1.90
 -10  -1  -1   19.20    4.50
 -10   1  -1   12.40    2.00
 -10   1  -1   17.40    3.00
 -10   1  -1   15.50    2.30
  10   1   1   13.90    2.50
 -10   1  -1   11.80    4.50
 -10   1  -1   14.80    3.90
 -11  -1  -1    0.10    3.90
 -11  -1  -1   -0.50    2.50
 -11  -1  -1    2.40    2.40
 -11  -1  -1    5.60    2.60
 -11  -1  -1   -2.10    2.90
 -11   1  -1    1.70    2.80
 -11   1  -1    4.10    2.60
  11   1   1    2.80    1.90
 -11   1  -1    7.20    4.40
 -11   1  -1    1.60    1.10
 -11   1  -1    0.50    1.40
 -12  -1  -1   47.70    4.60
 -12  -1  -1   42.80    7.60
 -12  -1  -1   40.00    6.90
 -12  -1  -1   47.50    8.70
 -12  -1  -1   42.00    5.10
 -12   1  -1   54.99    7.80
  12   1   1   42.10    3.40
 -12   1  -1   44.90    5.00
 -12   1  -1   38.20    2.70
 -12   1  -1   47.60    7.50
 -13  -1  -1    2.80    2.40
 -13  -1  -1    0.40    2.30
 -13  -1  -1   -6.10    3.80
 -13  -1  -1    0.50    3.00
 -13  -1  -1    3.80    4.10
 -13   1  -1   -3.50    2.90
 -13   1  -1    0.10    2.80
 -13   1  -1    4.90    3.70
 -14  -1  -1   58.99    8.00
 -14  -1  -1   50.09    9.50
 -14  -1  -1   62.99    4.40
 -14  -1  -1   57.59    4.30
 -14  -1  -1   73.79    6.90
 -14   1  -1   67.39    9.30
 -14   1  -1   64.99    9.30
 -15  -1  -1   -0.50    6.00
 -15  -1  -1    0.60    3.40
 -15  -1  -1    6.40    4.30
 -15   1  -1    3.90    5.80
 -15   1  -1    5.50    5.50
 -15   1  -1    2.50    5.10
 -15   1  -1    7.80    3.40
 -15  -2   1   20.30    7.40
 -15  -2   1   20.10    4.90
 -15  -2   1   10.30    6.80
 -15  -2   1   17.80    2.00
 -15  -2   1   22.70    6.40
 -15   2   1   28.70    7.20
 -15   2   1   14.30    3.10
 -15   2   1   10.80    5.30
 -15   2   1   20.30    5.30
 -14  -2   1   12.30    2.80
 -14  -2   1   19.60    6.70
 -14  -2   1    7.10    2.70
 -14  -2   1    1.40    4.70
 -14  -2   1    3.90    4.20
 -14  -2   1   12.70    3.90
 -14   2   1    1.30    2.30
 -14   2   1    4.60    4.70
 -14   2   1    8.60    5.30
 -14   2   1    6.80    4.30
 -13  -2   1    4.30    4.60
 -13  -2   1    1.80    3.20
 -13  -2   1    5.20    2.70
 -13  -2   1    3.80    5.40
 -13  -2   1    0.00    2.30
  13   2  -1    5.00    1.70
 -13   2   1    7.10    2.20
 -13   2   1    2.70    4.10
 -13   2   1    5.50    4.30
 -13   2   1   13.90    4.30
 -12  -2   1   10.10    3.30
 -12  -2   1   15.90    5.20
 -12  -2   1   10.80    3.50
 -12  -2   1   10.30    3.20
 -12   2   1   17.10    5.10
 -12   2   1    9.30    2.10
 -12   2   1    4.00    4.30
  12   2  -1    6.20    2.10
 -12   2   1    7.60    3.40
 -11  -2   1   43.20    5.70
 -11  -2   1   39.40    6.90
 -11  -2   1   34.60    5.40
 -11  -2   1   39.90    4.80
 -11  -2   1   38.80    4.40
  11   2  -1   41.90    3.70
 -11   2   1   44.70    6.00
 -11   2   1   36.60    2.80
 -11   2   1   46.20    6.00
 -11   2   1   29.40    4.90
 -10  -2   1    3.20    3.00
 -10  -2   1    2.40    2.30
 -10  -2   1    5.10    3.50
 -10  -2   1    5.60    2.70
 -10  -2   1    5.00    2.80
 -10   2   1    1.20    2.30
 -10   2   1    0.70    2.60
 -10   2   1    3.20    1.30
 -10   2   1    2.90    3.10
  10   2  -1    0.70    3.30
  -9  -2   1  297.67   10.60
  -9  -2   1  271.87   10.40
  -9  -2   1  285.77   13.20
  -9  -2   1  283.17   10.90
   9   2  -1  292.77    9.90
  -9   2   1  293.47   12.20
   9   2  -1  277.77   12.10
   9   2  -1  288.97    9.90
  -9   2   1  266.27    7.90
  -9   2   1  284.57   10.70
  -8  -2   1   15.80    4.30
  -8  -2   1   18.00    3.90
  -8  -2   1   19.60    3.30
  -8  -2   1   23.40    3.70
  -8  -2   1   17.60    3.20
  -8  -2   1   20.50    3.20
  -8   2   1   20.50    1.40
   8   2  -1   19.00    3.40
  -8   2   1   21.60    1.90
  -8   2   1   22.60    3.30
   8   2  -1   23.00    3.00
   8   2  -1   21.30    3.00
  -7  -2   1   53.09    4.00
  -7  -2   1   41.10    3.80
  -7  -2   1   38.70    3.70
   7  -2  -1   40.50    2.00
  -7  -2   1   43.40    4.80
  -7  -2   1   45.30    5.30
  -7  -2   1   42.60    3.90
   7   2  -1   46.80    5.00
  -7   2   1   38.00    3.30
   7   2  -1   36.90    3.40
  -7   2   1   38.10    2.20
   7   2  -1   39.20    3.50
   6  -2  -1   47.40    2.50
  -6  -2   1   47.30    4.50
   6  -2  -1   51.59    2.60
  -6  -2   1   50.49    4.30
  -6  -2   1   48.70    3.90
  -6  -2   1   50.09    3.60
  -6  -2   1   47.80    4.80
  -6  -2   1   43.70    4.00
   6   2  -1   45.70    3.60
  -6   2   1   47.10    2.50
   6   2  -1   49.60    3.60
   6   2  -1   53.59    4.30
   6   2  -1   52.89    2.90
   6   2  -1   48.50    3.00
  -6   2   1   50.79    3.20
   5  -2  -1  787.62   19.40
  -5  -2   1  811.22   20.90
  -5  -2   1  815.72   21.50
  -5  -2   1  814.72   21.90
  -5  -2   1  816.52   22.80
  -5  -2   1  806.42   21.50
  -5  -2   1  790.32   21.40
   5   2  -1  808.62   21.40
  -5   2   1  811.82   19.40
   5   2  -1  824.62   20.00
   5   2  -1  828.72   20.20
  -5   2   1  805.12   19.20
   5   2  -1  810.02   22.70
   5   2  -1  795.82   21.00
  -4  -2   1   32.30    3.60
   4  -2  -1   29.90    2.30
  -4  -2   1   34.90    3.10
  -4  -2   1   36.40    3.30
  -4  -2   1   28.70    3.70
  -4  -2   1   32.00    2.80
  -4  -2   1   32.20    3.90
   4   2  -1   29.80    2.80
   4   2  -1   32.90    3.80
  -4   2   1   30.60    2.30
   4   2  -1   29.90    2.90
  -4   2   1   29.80    2.20
  -4   2   1   32.70    2.40
   4   2  -1   31.40    3.30
   4   2  -1   31.60    2.70
  -4   2   1   31.10    1.80
   4   2  -1   32.70    3.00
   3  -2  -1  538.85   14.30
  -3  -2   1  545.15   15.40
  -3  -2   1  568.84   15.00
  -3  -2   1  543.75   15.70
   3  -2  -1  541.95   14.60
  -3  -2   1  557.14   15.10
  -3  -2   1  555.94   15.70
  -3  -2   1  557.24   15.40
  -3  -2   1  560.44   15.00
  -3   2   1  541.35   13.60
   3   2  -1  542.35   15.00
   3   2  -1  563.84   15.10
  -3   2   1  554.14   14.20
  -3   2   1  557.14   14.50
   3   2  -1  563.24   15.80
  -3   2   1  561.14   14.20
  -3   2   1  536.85   12.70
   3   2  -1  565.34   14.70
   3   2  -1  552.54   15.20
   2  -2  -1  737.03   19.10
   2  -2  -1  732.73   17.40
  -2  -2   1  739.13   19.10
  -2  -2   1  786.32   20.00
   2  -2  -1  748.13   17.70
  -2  -2   1  771.42   19.60
  -2  -2   1  783.12   20.30
  -2  -2   1  772.52   19.80
   2  -2  -1  782.22   19.50
   2   2  -1  788.12   19.30
   2   2  -1  774.02   20.30
   2   2  -1  762.12   19.70
  -2   2   1  796.22   18.90
  -2   2   1  753.02   18.90
  -2   2   1  767.02   19.00
  -2   2   1  760.32   17.60
   2   2  -1  793.62   19.70
   2   2  -1  759.32   19.10
   2   2  -1  750.72   19.70
  -2   2   1  766.72   17.30
  -1  -2   1  317.97    9.10
   1  -2  -1  309.77    8.80
  -1  -2   1  297.97    9.20
  -1  -2   1  316.57   10.00
   1  -2  -1  295.67    9.30
  -1  -2   1  328.67    9.60
  -1  -2   1  311.87    9.80
   1  -2  -1  306.37    8.00
   1  -2  -1  302.97    7.80
  -1   2   1  307.37    9.20
   1   2  -1  308.67    9.60
   1   2  -1  303.57    9.90
  -1   2   1  307.17    8.90
  -1   2   1  309.47    7.90
   1   2  -1  303.87    9.20
   1   2  -1  308.67    9.40
  -1   2   1  287.67    9.20
   1   2  -1  296.87    9.00
  -1   2   1  294.87    8.60
   0  -2   1  971.20   23.60
   0  -2  -1  929.11   21.80
   0  -2  -1  915.61   22.10
   0  -2   1  934.91   21.80
   0  -2   1  920.91   23.10
   0  -2   1  958.10   22.50
   0  -2  -1  951.00   22.30
   0  -2   1  953.20   22.90
   0  -2  -1  939.41   22.60
   0  -2  -1  894.31   23.00
   0  -2  -1  952.60   23.10
   0  -2   1  923.91   22.50
   0   2  -1  921.51   23.10
   0   2  -1  875.41   22.70
   0   2   1  924.71   21.80
   0   2   1  908.71   22.50
   0   2   1  912.21   23.10
   0   2   1  928.31   22.30
   0   2  -1  948.61   23.60
   0   2   1  945.81   23.00
   0   2  -1  898.21   22.30
   0   2  -1  905.41   22.40
  -1  -2  -1 2629.94   83.09
   1  -2   1 2843.72   89.59
   1   2   1 2651.73   83.29
  -1   2  -1 2788.32   89.59
  -2  -2  -1   97.39    4.50
  -2  -2  -1   98.29    4.70
   2  -2   1   89.69    4.20
   2  -2   1   89.79    4.20
  -2  -2  -1   87.69    4.50
   2  -2   1   92.29    4.60
   2  -2   1  104.99    4.60
  -2  -2  -1   95.59    4.80
   2  -2   1   93.09    2.80
  -2  -2  -1   96.39    4.80
  -2   2  -1   95.39    2.80
   2   2   1   97.39    4.60
  -2   2  -1   90.39    4.20
  -2   2  -1  101.29    4.60
  -2   2  -1   90.89    4.30
  -2   2  -1   90.19    4.60
   2   2   1   94.59    4.80
   2   2   1   95.89    4.40
   2   2   1   92.89    4.40
   2   2   1  100.29    5.10
   2   2   1   93.09    4.50
  -3  -2  -1  760.22   20.10
   3  -2   1  728.73   18.60
  -3  -2  -1  753.92   19.50
   3  -2   1  739.63   19.20
  -3  -2  -1  751.42   20.30
  -3  -2  -1  751.42   19.60
  -3  -2  -1  754.82   19.90
   3   2   1  747.43   19.80
   3   2   1  736.73   19.10
  -3   2  -1  740.53   17.10
  -3   2  -1  749.82   18.70
  -3   2  -1  747.23   19.30
   3   2   1  739.13   20.10
   3   2   1  745.73   19.50
  -3   2  -1  748.53   19.00
   3   2   1  744.33   19.70
  -3   2  -1  745.73   19.40
  -4  -2  -1   32.80    3.50
  -4  -2  -1   34.60    3.40
  -4  -2  -1   37.00    3.50
   4  -2   1   31.70    2.50
  -4  -2  -1   38.00    4.00
  -4  -2  -1   38.20    4.40
   4  -2   1   41.60    3.10
   4   2   1   33.30    3.20
   4   2   1   37.80    3.40
  -4   2  -1   38.00    2.90
   4   2   1   33.80    3.10
  -4   2  -1   38.60    3.00
  -4   2  -1   38.20    2.10
  -4   2  -1   35.60    2.80
   4   2   1   34.60    3.70
   4   2   1   40.10    3.30
  -5  -2  -1    1.30    1.80
   5  -2   1    0.40    1.40
   5  -2   1   -0.10    1.00
  -5  -2  -1    2.50    1.80
  -5  -2  -1   -1.10    1.50
  -5  -2  -1    0.10    1.50
  -5  -2  -1    0.40    1.70
   5   2   1   -1.20    1.60
  -5   2  -1    0.80    1.20
   5   2   1    0.10    1.90
   5   2   1    1.40    1.60
  -5   2  -1   -0.80    1.20
  -5   2  -1    0.30    1.40
   5   2   1   -3.20    1.10
   5   2   1    0.20    1.70
  -5   2  -1    0.40    1.10
  -5   2  -1    1.40    1.80
  -6  -2  -1  100.49    5.70
  -6  -2  -1  101.79    5.60
   6  -2   1   99.79    4.30
  -6  -2  -1  102.59    6.80
  -6  -2  -1   92.19    5.60
  -6   2  -1   86.29    4.60
  -6   2  -1   98.49    4.70
   6   2   1  100.99    5.10
   6   2   1   95.79    5.20
   6   2   1   93.89    5.80
   6   2   1  104.29    4.90
   6   2   1   92.99    5.70
  -6   2  -1   96.49    4.70
  -6   2  -1   95.39    4.60
   7  -2   1  128.09    4.90
  -7  -2  -1  132.19    8.50
  -7  -2  -1  121.39    6.60
  -7  -2  -1  124.99    7.50
  -7  -2  -1  130.49    6.80
  -7  -2  -1  125.19    6.70
  -7   2  -1  129.09    5.60
   7   2   1  123.99    6.30
  -7   2  -1  119.09    5.40
   7   2   1  136.09    5.30
   7   2   1  124.29    5.20
   7   2   1  120.89    7.30
   7   2   1  121.09    6.70
  -7   2  -1  126.49    5.60
  -8  -2  -1   24.00    3.90
   8  -2   1   17.50    2.00
  -8  -2  -1   20.90    4.50
  -8  -2  -1   18.70    4.30
  -8  -2  -1   23.60    3.80
  -8  -2  -1   27.80    4.00
   8  -2   1   26.60    2.90
  -8   2  -1   19.70    2.70
  -8   2  -1   20.80    2.60
   8   2   1   27.20    3.50
  -8   2  -1   26.60    3.70
  -8   2  -1   20.70    2.90
   8   2   1   25.60    4.50
   8   2   1   25.70    3.80
  -9  -2  -1  385.46   13.70
   9  -2   1  393.06   11.20
  -9  -2  -1  407.96   13.90
  -9  -2  -1  411.76   15.80
  -9  -2  -1  424.36   17.00
  -9  -2  -1  377.66   13.70
   9  -2   1  383.76   10.20
  -9   2  -1  403.46   12.20
  -9   2  -1  395.66   13.50
   9   2   1  382.26   13.80
  -9   2  -1  406.56   16.00
   9   2   1  382.56   13.10
  -9   2  -1  393.46   11.50
 -10  -2  -1    5.80    3.10
 -10  -2  -1    1.50    3.70
 -10  -2  -1    3.70    3.40
 -10  -2  -1    2.20    2.70
  10  -2   1    5.30    1.50
 -10   2  -1    7.10    3.00
 -10   2  -1    4.40    1.70
 -10   2  -1    1.90    1.70
 -10   2  -1    1.40    3.90
 -10   2  -1    7.80    2.50
  10   2   1    4.90    2.50
 -11  -2  -1    3.00    2.90
 -11  -2  -1   -1.30    4.50
 -11  -2  -1   -0.10    2.80
 -11  -2  -1    2.00    2.60
 -11  -2  -1   -1.70    2.40
 -11   2  -1    3.70    3.20
 -11   2  -1    1.30    2.30
  11   2   1    2.20    2.20
 -11   2  -1    1.80    1.40
 -11   2  -1    3.60    4.50
 -12  -2  -1   -4.90    2.50
 -12  -2  -1   -1.20    2.90
 -12  -2  -1   -5.40    3.00
 -12  -2  -1   -0.60    2.30
 -12  -2  -1   -0.10    4.00
  12   2   1    3.00    2.30
 -12   2  -1    0.70    2.60
 -12   2  -1    1.20    1.00
 -12   2  -1    4.00    3.10
 -12   2  -1   -0.50    4.90
 -13  -2  -1  142.59   11.40
 -13  -2  -1  142.19    8.50
 -13  -2  -1  130.89    8.20
 -13  -2  -1  140.49   11.60
 -13  -2  -1  137.99    8.80
  13   2   1  138.49    7.80
 -13   2  -1  144.09    8.10
 -13   2  -1  150.18   11.70
 -13   2  -1  134.09    9.10
 -13   2  -1  151.38    9.90
 -14  -2  -1   18.40    7.00
 -14  -2  -1   11.90    5.90
 -14  -2  -1   22.80    5.00
 -14  -2  -1    6.00    3.30
 -14   2  -1    5.60    5.10
 -14   2  -1   19.60    5.50
 -14   2  -1   13.50    6.10
 -15  -2  -1   35.50    5.90
 -15  -2  -1   36.40    6.70
 -15  -2  -1   36.20    9.80
 -15  -2  -1   32.80    6.70
 -15   2  -1   61.49    9.50
 -15   2  -1   33.60    6.90
 -15   2  -1   43.70    5.80
 -15   2  -1   34.70    6.30
 -15  -3   1    3.40    5.10
 -15  -3   1   -1.70    2.60
 -15  -3   1   -4.50    3.50
 -15  -3   1    1.20    3.60
 -15   3   1    2.60    3.50
 -15   3   1   -0.70    4.90
 -15   3   1   -1.20    4.70
 -14  -3   1   22.30    6.10
 -14  -3   1   21.80    6.60
 -14  -3   1   20.10    4.30
 -14  -3   1   20.20    4.60
 -14  -3   1   30.60    5.80
 -14  -3   1   23.40    7.20
 -14   3   1   22.40    5.20
 -14   3   1   23.40    5.80
  14   3  -1   23.60    4.30
 -14   3   1   22.70    3.50
 -14   3   1   20.10    5.90
 -13  -3   1    1.50    3.00
 -13  -3   1    3.90    4.70
 -13  -3   1    6.10    2.90
 -13  -3   1    4.60    5.50
 -13  -3   1   -1.80    3.30
 -13   3   1    0.30    4.20
 -13   3   1    1.00    2.10
 -13   3   1    6.20    3.70
 -13   3   1    1.20    3.20
 -13   3   1    6.50    5.40
  13   3  -1    5.50    2.80
 -12  -3   1   19.10    4.60
 -12  -3   1   18.90    5.60
 -12  -3   1   15.60    4.10
 -12  -3   1   18.80    4.30
 -12   3   1   19.10    3.90
 -12   3   1   20.20    3.00
 -12   3   1   21.70    5.50
  12   3  -1   19.00    3.70
 -12   3   1   20.80    3.80
 -12   3   1   29.30    5.40
 -11  -3   1   27.30    5.00
 -11  -3   1   27.60    5.70
 -11  -3   1   32.20    5.00
 -11  -3   1   32.20    8.00
  11   3  -1   24.90    4.00
 -11   3   1   28.40    4.10
 -11   3   1   22.20    3.10
 -11   3   1   29.70    4.10
 -11   3   1   32.50    5.80
 -10  -3   1  163.58    8.90
 -10  -3   1  174.48   10.20
 -10  -3   1  147.89   10.90
 -10  -3   1  163.18    8.70
 -10  -3   1  156.78    9.10
  10   3  -1  156.38    8.00
 -10   3   1  153.08    4.80
 -10   3   1  149.99    7.10
 -10   3   1  155.58    6.60
 -10   3   1  153.68    4.80
  -9  -3   1    5.70    3.20
  -9  -3   1    0.80    3.80
   9  -3  -1    4.20    1.20
  -9  -3   1    0.80    2.40
  -9  -3   1    0.00    2.50
   9  -3  -1    3.90    1.10
  -9  -3   1    3.50    2.70
  -9   3   1    3.00    1.50
  -9   3   1    3.70    2.00
  -9   3   1    1.60    2.40
   9   3  -1    2.20    3.20
   9   3  -1    0.80    2.30
  -9   3   1    2.70    1.40
  -9   3   1    0.10    1.80
  -8  -3   1   55.89    5.60
  -8  -3   1   63.79    6.30
   8  -3  -1   64.49    3.70
  -8  -3   1   73.89    6.10
   8  -3  -1   55.79    3.30
  -8  -3   1   72.79    6.30
  -8   3   1   63.49    3.70
  -8   3   1   65.19    5.20
   8   3  -1   58.89    5.30
   8   3  -1   64.39    4.00
   8   3  -1   61.69    3.90
   8   3  -1   57.99    4.90
   8   3  -1   59.79    5.00
  -8   3   1   54.49    4.00
  -8   3   1   66.69    3.70
  -8   3   1   62.79    4.20
  -7  -3   1   22.30    4.20
  -7  -3   1   28.90    4.50
  -7  -3   1   28.10    4.00
   7  -3  -1   30.00    2.80
   7  -3  -1   30.20    2.90
  -7  -3   1   31.10    4.30
  -7  -3   1   30.10    4.50
  -7   3   1   24.10    2.20
  -7   3   1   31.30    3.80
   7   3  -1   24.00    3.60
  -7   3   1   27.30    2.90
  -7   3   1   32.80    2.90
  -7   3   1   31.40    3.40
   7   3  -1   33.10    3.50
   7   3  -1   28.50    4.00
   6  -3  -1  262.07    8.60
  -6  -3   1  266.07   10.90
  -6  -3   1  267.07   10.20
  -6  -3   1  252.37   11.20
  -6  -3   1  257.07   10.50
  -6  -3   1  261.67   10.30
  -6  -3   1  270.17   10.80
   6   3  -1  250.97    9.90
   6   3  -1  254.07    9.10
   6   3  -1  266.87   10.30
  -6   3   1  257.67    8.40
  -6   3   1  264.57    7.40
   6   3  -1  257.47   10.10
  -6   3   1  250.97    8.50
   6   3  -1  247.78    9.50
   6   3  -1  238.88   10.90
   5  -3  -1   69.59    4.30
  -5  -3   1   60.69    5.00
  -5  -3   1   61.29    4.90
   5  -3  -1   68.99    4.10
  -5  -3   1   68.19    4.90
  -5  -3   1   55.09    5.30
  -5  -3   1   59.79    4.40
  -5  -3   1   63.69    4.70
  -5   3   1   62.49    4.50
   5   3  -1   59.59    4.70
   5   3  -1   66.59    4.90
  -5   3   1   64.29    3.90
  -5   3   1   62.29    1.80
  -5   3   1   62.09    3.80
   5   3  -1   66.09    5.20
   5   3  -1   62.49    4.50
   5   3  -1   62.09    4.70
   5   3  -1   72.79    4.90
  -5   3   1   67.39    4.00
  -4  -3   1  944.21   26.30
  -4  -3   1  958.30   25.00
  -4  -3   1  911.91   25.60
   4  -3  -1  962.00   24.60
  -4  -3   1  972.20   25.90
   4  -3  -1  909.91   24.10
  -4  -3   1  943.01   25.00
  -4  -3   1  937.21   25.90
   4   3  -1  965.90   24.60
   4   3  -1  952.20   25.20
   4   3  -1  914.11   25.90
   4   3  -1  980.80   25.10
  -4   3   1  931.81   24.30
   4   3  -1  970.00   25.40
  -4   3   1  933.41   22.80
   4   3  -1  987.40   25.40
  -4   3   1  955.40   23.90
  -4   3   1  949.60   24.10
   3  -3  -1   32.10    3.60
  -3  -3   1   35.90    4.20
  -3  -3   1   33.80    3.20
  -3  -3   1   37.30    3.50
   3  -3  -1   33.40    3.10
   3  -3  -1   38.20    2.60
  -3  -3   1   40.30    4.50
   3  -3  -1   32.00    1.20
  -3   3   1   33.80    3.10
   3   3  -1   39.80    4.20
   3   3  -1   38.90    4.30
   3   3  -1   33.10    3.70
  -3   3   1   30.30    2.20
  -3   3   1   35.30    3.10
   3   3  -1   35.60    3.40
   3   3  -1   32.10    3.00
  -3   3   1   36.00    3.20
   3   3  -1   29.10    3.60
  -2  -3   1  420.16   13.40
   2  -3  -1  405.76   10.80
  -2  -3   1  390.86   13.50
   2  -3  -1  426.36   13.20
  -2  -3   1  408.56   12.30
   2  -3  -1  400.16   10.00
  -2  -3   1  398.16   13.20
  -2  -3   1  421.86   12.90
   2  -3  -1  389.96   12.50
  -2  -3   1  380.56   12.70
   2  -3  -1  410.46   12.10
   2   3  -1  404.16   12.30
  -2   3   1  392.56   12.30
  -2   3   1  404.96   12.40
   2   3  -1  411.66   13.30
   2   3  -1  393.26   12.60
   2   3  -1  392.36   12.40
  -2   3   1  401.16   10.70
   2   3  -1  399.46   12.80
  -2   3   1  410.56   11.90
   1  -3  -1  253.77    9.60
   1  -3  -1  256.77    9.30
  -1  -3   1  243.28    8.60
  -1  -3   1  256.67   10.00
   1  -3  -1  256.37    8.50
  -1  -3   1  242.98    8.70
   1  -3  -1  242.68    7.50
  -1  -3   1  251.27    9.40
   1  -3  -1  251.27    7.50
  -1  -3   1  237.88    9.10
   1   3  -1  269.27    9.40
  -1   3   1  259.67    8.70
   1   3  -1  239.78    8.80
  -1   3   1  259.77    7.70
  -1   3   1  265.77    9.20
  -1   3   1  255.57    9.10
  -1   3   1  231.18    8.30
   1   3  -1  248.08    9.80
   1   3  -1  252.47    9.60
   1   3  -1  239.88    8.60
   1   3  -1  247.18    8.80
   0  -3   1   29.20    3.60
   0  -3   1   28.70    3.90
   0  -3   1   27.60    2.30
   0  -3  -1   25.60    2.90
   0  -3  -1   25.50    3.50
   0  -3   1   28.30    3.20
   0  -3  -1   30.00    3.60
   0  -3  -1   28.30    2.50
   0  -3   1   28.60    3.10
   0   3  -1   28.60    3.50
   0   3   1   26.40    2.40
   0   3  -1   29.10    2.60
   0   3  -1   26.60    3.00
   0   3   1   22.70    2.90
   0   3   1   32.00    3.50
   0   3  -1   26.20    3.50
   0   3   1   28.40    3.30
   0   3   1   24.80    3.40
   0   3   1   29.70    2.80
  -1  -3  -1   12.50    2.30
   1  -3   1   12.30    2.30
   1  -3   1   13.90    2.90
  -1  -3  -1    7.90    2.10
   1  -3   1   11.50    1.50
  -1  -3  -1   11.20    2.10
   1  -3   1   13.70    2.40
  -1  -3  -1   15.40    2.70
   1  -3   1   12.60    2.30
   1  -3   1   17.70    2.90
  -1   3  -1   10.70    2.10
   1   3   1   12.20    2.30
   1   3   1   13.70    2.80
  -1   3  -1   13.10    2.50
  -1   3  -1   11.40    2.70
   1   3   1   12.10    2.20
  -1   3  -1   12.80    2.00
   1   3   1   12.50    2.70
   1   3   1   13.10    2.40
  -1   3  -1   14.30    3.00
   1   3   1    9.70    2.80
  -2  -3  -1 1130.39   28.60
  -2  -3  -1 1077.59   28.20
   2  -3   1 1088.69   27.80
  -2  -3  -1 1151.58   29.50
  -2  -3  -1 1129.39   28.20
   2  -3   1 1107.09   28.10
  -2  -3  -1 1056.19   28.80
   2  -3   1 1178.98   29.20
  -2   3  -1 1073.59   28.90
   2   3   1 1153.98   29.00
   2   3   1 1128.59   28.40
  -2   3  -1 1152.08   27.60
   2   3   1 1143.19   28.40
   2   3   1 1120.39   29.30
   2   3   1 1167.98   29.70
   2   3   1 1110.39   28.10
  -2   3  -1 1099.39   28.60
  -2   3  -1 1082.99   28.00
  -2   3  -1 1148.49   28.30
  -3  -3  -1   -1.30    1.30
   3  -3   1   -2.30    1.20
  -3  -3  -1    1.90    1.60
  -3  -3  -1    0.00    1.50
  -3  -3  -1   -2.60    1.70
   3  -3   1   -0.60    1.60
  -3  -3  -1   -1.40    1.80
   3  -3   1    1.20    1.70
  -3   3  -1    0.10    1.80
   3   3   1   -0.10    1.50
   3   3   1    0.60    1.70
   3   3   1    1.90    2.00
   3   3   1    1.20    1.90
  -3   3  -1   -0.40    1.50
  -3   3  -1   -1.70    1.70
  -3   3  -1    0.70    1.50
   3   3   1   -0.30    1.70
   3   3   1   -3.50    1.80
  -4  -3  -1  534.25   16.20
  -4  -3  -1  524.95   16.70
  -4  -3  -1  534.85   16.30
  -4  -3  -1  539.05   16.90
  -4  -3  -1  538.85   16.80
   4  -3   1  555.64   15.90
   4  -3   1  536.25   15.20
   4   3   1  542.85   15.80
  -4   3  -1  541.45   16.10
  -4   3  -1  522.55   15.10
   4   3   1  500.75   15.80
   4   3   1  528.65   16.60
   4   3   1  518.75   16.30
   4   3   1  546.45   17.10
  -4   3  -1  528.35   15.60
  -4   3  -1  536.55   15.80
  -5  -3  -1   86.99    5.70
   5  -3   1   82.79    4.70
  -5  -3  -1   83.09    5.50
  -5  -3  -1   90.19    7.20
  -5  -3  -1   78.99    5.50
   5  -3   1   85.59    5.20
   5   3   1   83.19    5.40
   5   3   1   84.29    6.10
   5   3   1   81.89    5.50
  -5   3  -1   79.59    4.90
   5   3   1   80.09    5.20
   5   3   1   86.29    5.70
  -5   3  -1   87.49    5.30
  -5   3  -1   80.49    2.70
  -5   3  -1   83.89    4.80
  -5   3  -1   86.89    5.40
  -6  -3  -1  201.68    9.30
  -6  -3  -1  213.28   10.50
  -6  -3  -1  192.68    9.10
  -6  -3  -1  206.48    9.10
   6  -3   1  184.68    7.30
   6  -3   1  179.98    8.80
  -6   3  -1  199.38    8.80
  -6   3  -1  198.58    7.70
   6   3   1  189.88    8.80
  -6   3  -1  201.38    6.00
   6   3   1  210.28    8.30
   6   3   1  210.58    9.70
  -6   3  -1  196.88    8.20
   6   3   1  205.88    8.90
   6   3   1  205.18    8.80
  -6   3  -1  198.58    8.20
   7  -3   1   21.60    3.40
  -7  -3  -1   25.10    4.40
  -7  -3  -1   22.10    4.50
  -7  -3  -1   31.10    4.60
  -7  -3  -1   24.20    4.10
  -7  -3  -1   14.90    3.60
   7  -3   1   23.20    2.80
  -7   3  -1   26.30    3.50
   7   3   1   27.80    4.10
   7   3   1   21.10    3.60
  -7   3  -1   19.90    3.20
   7   3   1   26.20    4.00
  -7   3  -1   25.00    4.10
   7   3   1   25.00    3.60
  -7   3  -1   21.50    2.40
   7   3   1   24.10    4.20
   7   3   1   24.00    4.20
  -8  -3  -1  908.91   27.20
  -8  -3  -1  897.51   26.30
  -8  -3  -1  913.11   28.60
  -8  -3  -1  899.71   25.90
  -8   3  -1  916.91   24.00
   8   3   1  854.81   26.90
  -8   3  -1  931.81   26.50
  -8   3  -1  922.41   24.30
  -8   3  -1  888.31   22.70
  -8   3  -1  954.30   23.90
  -9  -3  -1   -0.50    2.70
  -9  -3  -1    3.80    4.10
  -9  -3  -1    2.50    2.80
   9  -3   1   -0.80    1.70
  -9  -3  -1   -1.80    2.60
  -9   3  -1   -1.80    1.90
  -9   3  -1    7.10    2.40
   9   3   1   -0.20    1.70
  -9   3  -1    3.00    2.20
   9   3   1    0.40    1.70
   9   3   1    6.20    2.90
  -9   3  -1    5.60    2.50
 -10  -3  -1  130.09   10.50
 -10  -3  -1  113.69    8.10
 -10  -3  -1  109.59    7.60
 -10  -3  -1  105.09    7.60
 -10  -3  -1  105.49    8.80
 -10   3  -1  107.19    6.30
 -10   3  -1  102.49    8.00
  10   3   1   97.19    7.00
 -10   3  -1  115.29    6.20
 -10   3  -1  109.29    5.70
 -10   3  -1  101.49    6.20
  11  -3   1    1.00    1.50
  11  -3   1   -1.10    1.10
 -11  -3  -1   -1.60    3.00
 -11  -3  -1   -2.30    3.20
 -11  -3  -1   -1.70    2.90
 -11  -3  -1    3.50    3.60
 -11   3  -1   -1.80    2.40
  11   3   1   -0.60    2.40
 -11   3  -1    1.00    2.50
 -11   3  -1   -1.00    2.90
 -11   3  -1    1.80    2.80
 -11   3  -1   -0.90    1.60
 -12  -3  -1   97.99    8.80
 -12  -3  -1   69.09    7.30
 -12  -3  -1   64.89    7.30
 -12  -3  -1   87.49   10.70
 -12  -3  -1   88.09    8.80
  12   3   1   90.79    8.90
 -12   3  -1   81.19    6.20
 -12   3  -1   60.39    7.90
 -12   3  -1   74.29    3.60
 -13  -3  -1    0.80    3.80
 -13  -3  -1    3.40    3.70
 -13  -3  -1   -2.10    3.60
 -13  -3  -1   10.00    5.60
 -13  -3  -1   -0.30    3.60
 -13   3  -1    5.10    5.40
  13   3   1    5.60    3.30
 -13   3  -1    2.10    3.10
 -13   3  -1   -1.20    3.40
 -14  -3  -1   50.19    8.50
 -14  -3  -1   61.39   10.00
 -14  -3  -1   50.59    6.60
 -14  -3  -1   40.20    6.70
 -14   3  -1   40.40    7.40
 -14   3  -1   29.50    7.10
 -14   3  -1   52.59    5.90
 -14  -4   1    1.10    6.00
 -14  -4   1    6.30    4.00
 -14  -4   1    3.00    4.20
 -14  -4   1    8.00    5.30
 -14   4   1    6.00    2.60
 -14   4   1    4.10    5.10
 -14   4   1   10.20    5.10
 -13  -4   1    1.50    3.70
 -13  -4   1   -1.00    3.70
 -13  -4   1   -0.70    3.50
 -13  -4   1    2.20    5.50
 -13  -4   1    1.20    4.70
 -13   4   1   -1.30    4.70
 -13   4   1   -0.60    2.70
 -13   4   1    5.30    2.90
 -13   4   1    2.10    4.20
 -13   4   1    2.40    2.20
  13   4  -1   -1.50    3.00
 -12  -4   1   -5.10    3.10
 -12  -4   1   -4.30    2.90
 -12  -4   1    5.10    3.80
 -12  -4   1   -2.50    4.30
 -12  -4   1    7.80    4.20
 -12   4   1   -1.30    4.20
 -12   4   1   -6.10    2.40
 -12   4   1    0.20    3.80
  12   4  -1   -3.40    2.80
 -12   4   1   -1.50    1.70
 -11  -4   1   60.29    7.30
 -11  -4   1   61.99    8.40
 -11  -4   1   50.89    6.90
 -11   4   1   53.99    3.40
 -11   4   1   47.90    6.00
  11   4  -1   54.09    6.10
 -11   4   1   54.19    5.20
 -11   4   1   52.09    3.30
 -11   4   1   51.39    3.50
 -10  -4   1    2.70    3.60
 -10  -4   1    9.50    4.70
  10  -4  -1    3.50    1.60
 -10  -4   1    3.20    3.20
 -10  -4   1    1.10    3.30
 -10  -4   1    6.50    3.70
  10  -4  -1    3.00    1.80
  10   4  -1    2.00    2.90
  10   4  -1    4.30    2.00
  10   4  -1    2.30    1.80
 -10   4   1    2.30    1.90
 -10   4   1    1.50    1.70
 -10   4   1    3.20    3.30
 -10   4   1    2.90    2.60
 -10   4   1    3.00    1.30
 -10   4   1    3.10    1.30
  -9  -4   1   94.89    7.90
  -9  -4   1   93.19    7.30
  -9  -4   1   85.59    7.10
  -9  -4   1   94.39    8.20
  -9  -4   1   87.39    7.00
   9  -4  -1   81.49    4.70
   9  -4  -1   93.69    5.40
   9   4  -1   85.99    5.80
   9   4  -1   81.79    5.50
  -9   4   1  101.29    6.20
  -9   4   1   86.09    6.30
  -9   4   1   92.49    5.10
  -9   4   1   83.59    5.00
  -8  -4   1    8.70    3.60
  -8  -4   1   10.30    4.00
   8  -4  -1   12.00    2.50
  -8  -4   1    8.20    3.80
  -8  -4   1   16.60    5.20
  -8  -4   1    8.20    3.40
  -8   4   1    8.60    2.40
  -8   4   1    9.00    3.50
   8   4  -1    8.40    3.30
  -8   4   1   13.10    3.10
   8   4  -1    8.20    3.00
  -8   4   1   11.00    3.00
   8   4  -1   14.00    3.50
  -8   4   1    9.50    2.50
   7  -4  -1    1.30    1.90
  -7  -4   1    3.40    3.10
  -7  -4   1   -1.20    3.20
  -7  -4   1   -3.70    2.50
   7  -4  -1    0.70    2.10
  -7  -4   1    0.60    2.30
  -7  -4   1   -1.60    2.40
  -7   4   1    1.00    2.00
   7   4  -1    3.00    2.60
  -7   4   1    2.50    2.30
   7   4  -1   -0.40    1.90
   7   4  -1    2.70    2.60
   7   4  -1   -4.50    1.90
  -7   4   1    1.90    1.90
   7   4  -1    0.90    2.20
   7   4  -1    0.80    2.50
  -7   4   1    1.00    1.90
  -6  -4   1   45.10    6.30
  -6  -4   1   53.09    5.80
  -6  -4   1   43.80    5.70
   6  -4  -1   51.79    4.60
  -6  -4   1   50.19    4.90
   6  -4  -1   48.80    4.10
  -6   4   1   53.09    3.90
  -6   4   1   50.89    4.30
  -6   4   1   47.80    5.20
   6   4  -1   51.59    5.10
   6   4  -1   51.59    4.70
   6   4  -1   57.09    6.00
   6   4  -1   51.69    6.20
   6   4  -1   45.20    5.50
  -6   4   1   45.70    4.90
   6   4  -1   50.19    5.50
  -6   4   1   50.39    4.10
  -5  -4   1  248.38   10.40
   5  -4  -1  244.98    9.90
  -5  -4   1  230.78   10.60
   5  -4  -1  233.58    9.50
  -5  -4   1  225.18   11.00
  -5  -4   1  233.98   11.10
  -5   4   1  246.88    9.40
   5   4  -1  226.18    9.80
   5   4  -1  242.08    9.80
  -5   4   1  233.28    8.10
   5   4  -1  220.98   10.90
  -5   4   1  239.08   10.00
   5   4  -1  232.48   10.30
  -5   4   1  238.58    9.70
   5   4  -1  239.38   10.70
   5   4  -1  253.17   10.70
  -5   4   1  245.58    9.50
   4  -4  -1   21.10    3.70
  -4  -4   1   20.70    4.40
  -4  -4   1   25.50    4.40
  -4  -4   1   17.20    3.90
  -4  -4   1   19.30    3.80
   4  -4  -1   19.20    3.30
  -4  -4   1   17.50    3.70
  -4   4   1   27.80    3.80
   4   4  -1   30.00    4.40
   4   4  -1   21.50    4.00
   4   4  -1   24.70    3.80
   4   4  -1   21.80    4.20
  -4   4   1   24.00    2.60
  -4   4   1   27.70    3.80
  -4   4   1   24.80    3.60
  -4   4   1   20.20    3.60
   4   4  -1   19.20    3.70
   4   4  -1   23.40    4.00
   3  -4  -1  541.15   15.00
   3  -4  -1  544.15   17.10
  -3  -4   1  536.05   18.10
   3  -4  -1  579.84   17.90
  -3  -4   1  508.35   17.90
   3  -4  -1  520.65   12.80
  -3  -4   1  574.04   17.60
  -3   4   1  568.44   14.70
   3   4  -1  571.04   18.00
  -3   4   1  556.54   17.00
  -3   4   1  569.44   17.60
   3   4  -1  548.05   17.50
  -3   4   1  569.84   16.60
   3   4  -1  566.14   17.20
   3   4  -1  557.64   17.90
   3   4  -1  545.65   17.60
   3   4  -1  565.64   17.00
   2  -4  -1   14.70    3.10
  -2  -4   1    8.30    3.00
  -2  -4   1    9.90    2.90
  -2  -4   1   13.60    2.70
  -2  -4   1   16.40    3.50
   2  -4  -1   13.20    2.70
   2  -4  -1   12.90    2.30
   2  -4  -1   13.40    3.00
  -2  -4   1   16.60    3.60
   2  -4  -1   14.60    1.90
  -2   4   1   12.70    2.70
   2   4  -1   14.90    2.80
  -2   4   1   13.70    2.20
  -2   4   1   13.70    2.60
  -2   4   1   14.90    2.90
   2   4  -1   11.90    3.00
   2   4  -1   12.90    3.10
  -2   4   1    9.70    2.80
   2   4  -1   18.00    3.30
   2   4  -1   13.50    2.90
   2   4  -1   18.00    3.60
  -2   4   1   13.70    3.00
   1  -4  -1   18.90    2.70
   1  -4  -1   16.40    2.40
  -1  -4   1   14.70    3.30
  -1  -4   1   14.80    2.70
  -1  -4   1   14.70    2.90
   1  -4  -1   19.30    3.50
  -1  -4   1   15.60    2.90
   1  -4  -1   15.20    2.70
  -1  -4   1   17.60    3.30
   1  -4  -1   22.50    4.10
  -1  -4   1   13.00    3.00
   1   4  -1   23.60    4.10
   1   4  -1   22.40    3.20
  -1   4   1   19.10    3.10
  -1   4   1   13.00    2.80
   1   4  -1   13.40    2.90
  -1   4   1   16.40    2.40
  -1   4   1   18.50    3.30
  -1   4   1   17.60    2.90
   1   4  -1   14.40    2.70
   1   4  -1   19.70    3.10
  -1   4   1   15.10    3.50
   0  -4  -1   34.00    4.10
   0  -4   1   41.50    3.40
   0  -4   1   39.50    3.80
   0  -4  -1   38.60    3.30
   0  -4   1   47.70    5.50
   0  -4   1   40.40    3.80
   0  -4  -1   38.20    5.20
   0  -4   1   42.10    3.90
   0  -4  -1   42.00    4.90
   0   4  -1   45.70    3.60
   0   4   1   43.30    3.50
   0   4   1   36.70    3.50
   0   4   1   41.80    4.00
   0   4   1   39.60    4.70
   0   4  -1   42.30    5.10
   0   4  -1   44.70    3.80
   0   4  -1   41.30    4.90
   0   4   1   43.40    5.00
   0   4   1   46.40    4.00
   0   4  -1   46.70    5.00
   1  -4   1  599.84   17.60
  -1  -4  -1  605.24   17.70
  -1  -4  -1  588.14   17.00
  -1  -4  -1  617.74   19.70
   1  -4   1  582.84   15.40
   1  -4   1  641.24   19.30
   1  -4   1  590.24   17.00
   1  -4   1  602.54   18.00
  -1  -4  -1  569.34   18.60
   1   4   1  591.34   17.30
   1   4   1  593.64   19.00
   1   4   1  570.64   17.60
   1   4   1  623.34   18.70
   1   4   1  625.14   17.40
   1   4   1  546.15   18.10
  -1   4  -1  566.84   17.80
  -1   4  -1  590.04   16.90
  -1   4  -1  592.84   18.70
  -1   4  -1  598.64   17.50
  -1   4  -1  601.54   19.20
   2  -4   1    8.40    3.00
  -2  -4  -1    7.90    2.90
   2  -4   1    9.40    2.80
   2  -4   1    6.90    1.30
  -2  -4  -1    8.70    2.60
   2  -4   1    6.60    2.40
  -2  -4  -1    6.20    2.60
  -2  -4  -1    7.60    2.80
  -2  -4  -1    9.40    2.50
   2   4   1    7.50    2.50
   2   4   1   10.60    2.70
  -2   4  -1    5.30    2.50
  -2   4  -1    8.30    2.50
   2   4   1    5.60    2.60
  -2   4  -1    4.50    2.70
  -2   4  -1    9.20    3.00
   2   4   1   12.70    3.00
   2   4   1    2.70    2.80
  -2   4  -1    6.80    2.10
   2   4   1    4.60    2.10
   3  -4   1  404.16   14.20
  -3  -4  -1  394.86   13.70
  -3  -4  -1  394.76   15.10
  -3  -4  -1  385.66   13.80
   3  -4   1  376.86   13.10
   3  -4   1  393.06   13.00
  -3  -4  -1  383.36   13.50
  -3  -4  -1  400.76   14.50
  -3   4  -1  378.46   13.30
   3   4   1  399.66   14.30
   3   4   1  402.86   13.80
  -3   4  -1  358.56   13.50
  -3   4  -1  404.66   12.60
  -3   4  -1  398.26   14.30
  -3   4  -1  381.26   13.20
   3   4   1  400.86   13.60
   3   4   1  422.06   14.50
   3   4   1  385.46   13.30
  -4  -4  -1    4.10    2.20
   4  -4   1    1.00    2.30
  -4  -4  -1    0.20    1.90
  -4  -4  -1    2.90    2.20
  -4  -4  -1    1.90    2.40
   4  -4   1    2.20    2.10
  -4  -4  -1    0.30    2.50
   4  -4   1    0.90    1.90
  -4   4  -1    0.10    1.70
   4   4   1    2.30    1.90
   4   4   1    0.10    1.70
   4   4   1    4.50    2.70
   4   4   1   -0.30    2.30
  -4   4  -1    7.00    2.80
  -4   4  -1    2.10    1.90
   4   4   1   -0.90    1.60
  -4   4  -1    1.90    2.10
   4   4   1    1.80    3.10
  -4   4  -1    1.80    2.30
  -5  -4  -1    0.00    2.70
  -5  -4  -1    3.40    2.50
  -5  -4  -1    0.80    2.20
  -5  -4  -1   -0.10    2.60
   5  -4   1   -1.00    1.50
   5  -4   1    1.40    2.50
  -5  -4  -1   -0.90    1.90
   5   4   1    1.60    2.30
   5   4   1   -1.60    2.50
   5   4   1   -0.10    1.60
   5   4   1    1.50    2.10
  -5   4  -1   -3.40    1.90
  -5   4  -1    1.70    2.10
  -5   4  -1    2.30    2.10
  -5   4  -1    2.00    2.30
  -5   4  -1    1.20    2.20
   5   4   1   -1.50    1.60
  -6  -4  -1   75.89    6.70
   6  -4   1   73.09    5.40
  -6  -4  -1   71.09    6.40
   6  -4   1   62.59    4.70
  -6  -4  -1   68.39    6.20
  -6  -4  -1   61.79    7.30
  -6  -4  -1   77.89    6.60
  -6   4  -1   78.59    6.00
   6   4   1   68.49    6.10
   6   4   1   74.89    8.00
   6   4   1   59.59    5.80
  -6   4  -1   70.39    5.20
  -6   4  -1   79.29    5.90
   6   4   1   67.49    5.60
  -6   4  -1   69.89    5.70
  -6   4  -1   65.89    5.70
   6   4   1   81.89    5.70
   7  -4   1  282.27   11.20
  -7  -4  -1  289.67   12.70
  -7  -4  -1  286.87   12.80
  -7  -4  -1  292.67   13.70
  -7  -4  -1  258.17   12.10
  -7  -4  -1  276.17   13.60
   7   4   1  277.07   11.00
  -7   4  -1  294.07   11.60
  -7   4  -1  286.47   11.30
  -7   4  -1  279.67   11.60
  -7   4  -1  285.57   10.60
   7   4   1  303.27   12.50
  -8  -4  -1    1.50    2.40
  -8  -4  -1   -0.10    3.80
  -8  -4  -1    1.00    4.10
  -8  -4  -1   -1.80    3.00
  -8  -4  -1    0.00    3.00
   8  -4   1   -0.20    2.20
   8   4   1   -1.20    2.50
  -8   4  -1   -1.90    2.40
  -8   4  -1    1.00    2.30
  -8   4  -1   -3.20    2.70
  -8   4  -1   -0.90    2.10
   8   4   1    0.20    2.80
   8   4   1    1.20    3.10
  -9  -4  -1  164.18   10.50
  -9  -4  -1  144.39    9.50
  -9  -4  -1  147.09    9.30
  -9  -4  -1  149.09   11.00
  -9  -4  -1  142.59    9.20
  -9   4  -1  151.58    7.50
   9   4   1  146.09    9.10
  -9   4  -1  166.18    9.50
  -9   4  -1  136.89    4.40
   9   4   1  163.98    8.30
   9   4   1  146.29    7.70
  -9   4  -1  136.49    8.80
 -10  -4  -1   46.70    6.90
 -10  -4  -1   26.80    5.70
 -10  -4  -1   33.00    5.80
  10  -4   1   34.70    4.50
 -10  -4  -1   39.40    7.50
  10  -4   1   35.80    4.10
  10   4   1   49.20    6.60
 -10   4  -1   37.00    4.50
 -10   4  -1   37.20    2.80
 -10   4  -1   39.10    2.70
 -10   4  -1   38.60    6.00
 -11  -4  -1   -5.40    4.40
  11  -4   1   -0.80    2.00
  11  -4   1    0.30    1.70
 -11  -4  -1   10.20    4.30
 -11  -4  -1   10.20    4.10
 -11  -4  -1   -2.50    4.60
 -11   4  -1    1.20    1.60
  11   4   1    1.30    3.00
 -11   4  -1    2.60    1.70
 -11   4  -1    1.70    2.20
 -11   4  -1    3.50    3.30
 -12  -4  -1   18.30    5.40
  12  -4   1   11.80    1.70
  12  -4   1    8.40    1.70
 -12  -4  -1   19.90    5.30
 -12  -4  -1   14.70    6.40
 -12  -4  -1    8.20    5.00
 -12  -4  -1   22.50    5.80
 -12   4  -1   16.70    6.10
 -12   4  -1   12.00    3.80
 -12   4  -1   10.10    3.50
  12   4   1   15.60    4.60
 -12   4  -1    8.20    2.30
 -12   4  -1   15.20    3.60
 -12   4  -1    9.20    2.20
 -13  -4  -1   89.99   10.80
 -13  -4  -1   85.89    8.40
 -13  -4  -1   95.79   12.20
 -13  -4  -1   76.79    9.30
  13   4   1  103.29    8.30
 -13   4  -1   93.89    5.50
 -13   4  -1   92.39   10.90
 -14  -4  -1    6.30    4.90
 -14  -4  -1   16.40    5.70
 -14  -4  -1    0.50    4.00
 -14  -4  -1    6.50    4.80
 -14   4  -1   10.00    6.10
 -14   4  -1    1.40    3.50
 -14  -5   1   72.79   10.70
 -14  -5   1  103.29   10.00
 -14  -5   1   78.49   11.80
 -14   5   1  103.89    7.80
 -14   5   1   92.49   10.80
 -13  -5   1   30.90    8.40
 -13  -5   1   40.30    7.40
 -13  -5   1   29.10    6.50
 -13   5   1   22.40    4.80
 -12  -5   1    5.20    4.90
 -12  -5   1    5.00    4.40
 -12  -5   1    0.00    3.40
 -12  -5   1    7.80    6.00
  12   5  -1   -3.40    3.30
 -12   5   1    3.10    3.50
 -12   5   1    2.00    1.90
 -12   5   1    6.20    2.00
 -12   5   1    2.20    3.90
 -11  -5   1    3.70    4.70
 -11  -5   1   10.40    4.70
  11  -5  -1    1.60    3.00
 -11  -5   1   11.10    5.40
 -11  -5   1   16.40    6.30
 -11   5   1    4.90    2.50
  11   5  -1   13.30    4.20
 -11   5   1    7.30    2.60
  11   5  -1    9.10    2.90
 -11   5   1    6.90    3.70
 -10  -5   1  214.28   12.20
 -10  -5   1  247.08   14.80
 -10  -5   1  231.58   13.40
 -10  -5   1  210.38   12.30
 -10   5   1  230.18    9.50
  10   5  -1  242.48   12.10
 -10   5   1  226.88    9.40
 -10   5   1  223.58   10.90
  10   5  -1  236.48   10.20
 -10   5   1  230.38   10.60
  -9  -5   1    4.20    3.40
  -9  -5   1    2.70    4.10
  -9  -5   1    4.10    4.30
  -9   5   1    2.90    2.40
   9   5  -1    1.40    3.00
  -9   5   1    1.00    2.50
  -9   5   1    5.60    3.10
   9   5  -1   -1.30    3.10
  -9   5   1   -0.40    2.80
   9   5  -1    3.60    3.30
  -8  -5   1   75.29    6.80
  -8  -5   1   76.09    8.30
  -8  -5   1   72.09    8.90
  -8  -5   1   77.69    8.70
  -8   5   1   76.69    5.80
   8   5  -1   82.19    7.20
  -8   5   1   83.39    6.00
  -8   5   1   78.29    6.40
   8   5  -1   70.49    6.60
   8   5  -1   78.09    6.60
  -8   5   1   75.39    5.40
  -7  -5   1   58.39    7.80
  -7  -5   1   48.40    6.50
   7  -5  -1   53.09    5.10
   7  -5  -1   52.09    4.90
  -7  -5   1   56.99    6.90
  -7  -5   1   50.69    6.90
  -7   5   1   53.89    4.30
   7   5  -1   62.29    7.00
  -7   5   1   48.00    6.10
  -7   5   1   49.30    5.20
   7   5  -1   60.79    7.10
  -7   5   1   47.30    5.70
  -7   5   1   55.59    5.70
   6  -5  -1   14.70    3.40
  -6  -5   1   13.20    4.70
  -6  -5   1   12.40    3.60
   6  -5  -1   16.80    3.70
  -6  -5   1   18.60    4.70
  -6  -5   1   22.80    4.70
  -6   5   1   12.90    3.30
   6   5  -1   19.60    4.50
  -6   5   1   12.80    2.60
  -6   5   1   11.60    3.80
  -6   5   1   22.40    4.50
   6   5  -1   22.00    5.70
  -6   5   1   17.00    3.60
  -5  -5   1   16.10    4.40
   5  -5  -1   13.20    3.80
  -5  -5   1   20.30    5.10
   5  -5  -1   24.10    4.20
  -5  -5   1   17.00    4.60
  -5  -5   1   19.30    4.40
   5   5  -1   22.80    4.40
  -5   5   1   21.00    2.90
   5   5  -1   23.60    4.80
  -5   5   1   24.50    4.00
   5   5  -1   19.50    5.50
   5   5  -1   18.10    4.30
  -5   5   1   24.40    4.00
   5   5  -1   21.00    4.20
  -5   5   1   26.20    4.30
  -5   5   1   24.30    4.70
   5   5  -1   19.40    4.80
   4  -5  -1  399.66   15.10
  -4  -5   1  371.16   16.80
   4  -5  -1  401.86   12.50
  -4  -5   1  386.26   14.50
  -4  -5   1  388.66   16.50
  -4  -5   1  408.26   16.00
   4  -5  -1  390.86   14.60
   4   5  -1  382.06   17.30
  -4   5   1  431.86   14.70
   4   5  -1  399.76   14.80
  -4   5   1  385.56   14.30
   4   5  -1  384.86   15.10
   4   5  -1  390.76   14.50
  -4   5   1  392.46   15.10
   4   5  -1  402.06   15.50
  -4   5   1  390.06   12.00
   4   5  -1  429.76   18.20
  -3  -5   1    1.60    2.40
  -3  -5   1   -2.20    1.90
   3  -5  -1    0.20    0.90
  -3  -5   1    1.10    2.70
   3  -5  -1    0.20    0.90
   3  -5  -1    3.90    2.70
   3  -5  -1   -4.20    2.50
   3  -5  -1    1.00    2.00
  -3  -5   1   -0.30    2.90
   3   5  -1    0.00    3.00
  -3   5   1   -1.60    1.50
   3   5  -1   -0.60    1.80
  -3   5   1   -1.20    2.40
   3   5  -1    0.70    2.70
  -3   5   1    1.40    2.50
   3   5  -1   -2.30    2.80
  -3   5   1    4.30    3.00
   3   5  -1    1.70    3.00
   3   5  -1   -1.40    2.30
  -3   5   1   -0.50    2.60
  -3   5   1   -0.20    1.50
  -2  -5   1  151.18    9.30
  -2  -5   1  162.68    9.50
  -2  -5   1  153.98    8.10
   2  -5  -1  145.89    8.40
   2  -5  -1  170.08    9.30
   2  -5  -1  164.38    8.30
   2  -5  -1  165.98    6.00
   2  -5  -1  163.98    7.10
  -2  -5   1  154.18    8.40
  -2   5   1  156.48    8.00
  -2   5   1  177.88    9.70
  -2   5   1  168.38    8.80
   2   5  -1  157.78    9.50
  -2   5   1  151.18    6.70
   2   5  -1  147.39    8.10
   2   5  -1  156.78    8.20
   2   5  -1  151.88    8.60
  -2   5   1  155.98    8.00
  -2   5   1  156.98    8.30
   2   5  -1  159.78    8.90
  -1  -5   1   85.79    6.60
  -1  -5   1   81.29    6.20
   1  -5  -1   88.49    5.10
   1  -5  -1   96.89    6.10
  -1  -5   1   86.19    7.60
  -1  -5   1   98.79    6.00
   1  -5  -1   86.09    5.40
   1  -5  -1   95.09    7.50
  -1   5   1   90.29    6.30
   1   5  -1   85.69    6.70
  -1   5   1   93.89    7.20
   1   5  -1   86.29    6.50
   1   5  -1   72.39    6.80
  -1   5   1   78.89    5.90
  -1   5   1   91.89    6.50
   1   5  -1   87.89    5.80
  -1   5   1   81.49    6.40
  -1   5   1   84.79    5.10
   0  -5   1  242.18   10.30
   0  -5  -1  250.57   10.50
   0  -5   1  253.77    9.90
   0  -5   1  235.18   11.60
   0  -5  -1  236.68    9.20
   0  -5  -1  239.48   11.10
   0  -5   1  248.58    9.20
   0  -5  -1  236.88    9.30
   0  -5  -1  241.78   11.80
   0  -5   1  243.68   11.30
   0   5  -1  262.37   11.90
   0   5   1  235.98    9.40
   0   5   1  244.38   11.70
   0   5  -1  213.38   11.10
   0   5   1  233.18   10.10
   0   5  -1  238.88   12.70
   0   5  -1  219.48    9.70
   0   5   1  245.28   11.10
   0   5   1  260.87   12.30
   0   5  -1  235.58   11.50
  -1  -5  -1  166.48    8.50
  -1  -5  -1  122.79    7.00
  -1  -5  -1  153.18    8.80
   1  -5   1  144.39    9.20
   1  -5   1  152.78    7.60
   1  -5   1  131.09    7.50
  -1  -5  -1  135.19    8.90
   1  -5   1  154.08    6.20
   1   5   1  144.39    8.80
   1   5   1  154.28    8.80
   1   5   1  137.09    8.20
  -1   5  -1  150.98    8.60
   1   5   1  159.88    9.00
   1   5   1  143.39    7.40
  -1   5  -1  142.49    8.00
  -1   5  -1  157.88    7.50
   2  -5   1  710.83   23.00
   2  -5   1  719.93   17.70
  -2  -5  -1  678.13   22.80
   2  -5   1  699.13   20.80
  -2  -5  -1  715.13   22.00
  -2  -5  -1  738.33   21.40
  -2  -5  -1  721.73   24.00
  -2   5  -1  719.63   20.40
  -2   5  -1  714.13   21.90
  -2   5  -1  746.63   23.10
  -2   5  -1  719.43   21.60
   2   5   1  714.83   22.50
   2   5   1  702.73   22.00
   2   5   1  685.23   22.50
   2   5   1  715.63   21.40
   2   5   1  696.53   21.30
   2   5   1  742.93   23.90
   3  -5   1    7.00    2.80
   3  -5   1    9.40    2.90
  -3  -5  -1    7.00    2.70
  -3  -5  -1    9.10    3.10
  -3  -5  -1    6.20    2.60
   3  -5   1   10.70    3.30
   3   5   1    6.50    3.30
   3   5   1    7.70    2.70
   3   5   1   11.70    3.50
  -3   5  -1    9.10    3.40
  -3   5  -1   14.10    3.50
   3   5   1   10.90    3.80
   3   5   1   13.60    3.40
  -3   5  -1   11.50    3.80
  -3   5  -1   10.80    2.70
   4  -5   1  146.69    7.90
  -4  -5  -1  157.98    8.60
  -4  -5  -1  149.59    9.50
  -4  -5  -1  150.48    8.70
  -4  -5  -1  158.88    9.40
   4  -5   1  160.68    9.30
  -4  -5  -1  167.98   10.70
  -4   5  -1  157.38    8.40
   4   5   1  161.28    9.20
  -4   5  -1  164.28    8.50
   4   5   1  161.38    9.20
  -4   5  -1  156.08    9.20
  -4   5  -1  146.59    8.90
   4   5   1  149.29    8.70
   4   5   1  161.38    8.80
  -4   5  -1  166.58    7.70
   4   5   1  145.99    9.20
  -5  -5  -1   84.29    7.10
   5  -5   1   92.49    7.00
  -5  -5  -1   91.99    7.50
  -5  -5  -1   92.69    6.80
  -5  -5  -1  101.09    8.00
  -5  -5  -1   94.69    8.50
  -5   5  -1   91.79    6.40
   5   5   1   87.49    7.60
   5   5   1   99.89    8.30
  -5   5  -1   78.99    6.90
   5   5   1   78.99    6.20
   5   5   1   94.29    7.00
  -5   5  -1   89.79    5.90
  -5   5  -1  106.09    7.90
  -5   5  -1   71.69    6.00
  -6  -5  -1  253.97   12.60
  -6  -5  -1  255.67   12.60
  -6  -5  -1  269.57   14.00
  -6  -5  -1  250.67   13.10
   6  -5   1  291.07   12.40
  -6  -5  -1  265.97   13.30
   6   5   1  257.07   11.70
  -6   5  -1  265.67   11.10
   6   5   1  263.77   12.90
  -6   5  -1  270.37   11.00
  -6   5  -1  279.57   12.30
   6   5   1  273.27   12.90
  -7  -5  -1   21.40    5.00
  -7  -5  -1   23.10    4.70
  -7  -5  -1   19.00    4.90
  -7  -5  -1   19.70    5.10
  -7  -5  -1   13.20    4.80
   7  -5   1   17.90    4.10
   7   5   1   19.30    4.90
   7   5   1   13.20    3.70
  -7   5  -1   16.10    4.10
  -7   5  -1   19.40    4.00
  -7   5  -1   20.40    3.90
   7   5   1   23.20    4.60
   8  -5   1  154.98    8.80
  -8  -5  -1  132.79    9.90
  -8  -5  -1  142.29   10.10
  -8  -5  -1  144.39    9.80
  -8  -5  -1  146.69   11.00
  -8  -5  -1  138.49   10.80
   8   5   1  133.89    9.50
  -8   5  -1  133.29    8.20
  -8   5  -1  129.29    7.70
  -8   5  -1  124.39    8.70
  -9  -5  -1   92.89    8.10
  -9  -5  -1   84.49    9.80
  -9  -5  -1   91.89    9.50
  -9  -5  -1   91.69    8.80
  -9  -5  -1   86.19    8.40
   9   5   1   94.79    7.80
  -9   5  -1   86.59    6.50
  -9   5  -1   69.89    7.80
   9   5   1  105.39    8.50
   9   5   1   83.19    7.10
 -10  -5  -1   22.00    5.80
 -10  -5  -1   12.90    5.10
 -10  -5  -1    8.80    4.60
 -10  -5  -1    9.30    5.20
 -10  -5  -1   19.50    5.80
 -10   5  -1    8.80    3.40
  10   5   1   16.70    4.80
  10   5   1    4.50    3.90
 -10   5  -1    7.40    4.00
 -10   5  -1   11.80    4.40
  10   5   1    9.20    4.90
 -11  -5  -1  112.69   10.40
 -11  -5  -1   77.39    9.10
 -11  -5  -1  112.69   10.80
 -11  -5  -1  108.69    9.60
 -11  -5  -1   97.19    9.40
 -11   5  -1   96.89    7.90
 -11   5  -1   97.89    6.90
 -11   5  -1   84.99    7.40
 -12  -5  -1    4.40    4.30
 -12  -5  -1    3.60    4.50
 -12  -5  -1    5.20    6.10
 -12  -5  -1   -0.70    4.40
 -12  -5  -1   -7.90    4.60
  12  -5   1    3.20    3.30
  12   5   1    6.10    4.50
 -12   5  -1    1.90    2.50
 -12   5  -1    4.60    3.70
 -13  -5  -1   -0.40    4.50
 -13  -5  -1    9.00    5.20
 -13  -5  -1   -0.60    3.70
 -13   5  -1   -0.70    1.80
 -13   5  -1    0.30    4.00
 -13   5  -1    2.00    2.00
 -13   5  -1    0.30    3.30
 -12  -6   1   41.80    7.60
 -12  -6   1   32.90    8.60
 -12  -6   1   27.10    6.60
 -12  -6   1   34.00    8.00
 -12   6   1   35.30    6.00
 -12   6   1   25.80    4.10
 -12   6   1   33.10    4.10
 -11  -6   1   17.70    6.80
 -11  -6   1   19.10    6.50
  11  -6  -1   17.30    4.30
 -11  -6   1    7.70    6.40
 -11  -6   1   11.70    6.50
 -11   6   1   25.20    6.80
 -11   6   1   17.00    5.00
  11   6  -1    4.00    5.90
 -11   6   1    9.50    4.40
  11   6  -1   22.80    5.30
 -11   6   1   21.10    4.10
 -10  -6   1   31.90    7.00
 -10  -6   1   26.00    6.10
 -10  -6   1   28.70    6.70
 -10  -6   1   28.20    5.80
 -10   6   1   21.80    4.30
 -10   6   1   18.40    4.10
  10   6  -1   23.30    5.70
  10   6  -1   20.00    4.90
 -10   6   1   21.70    5.40
 -10   6   1   26.40    4.50
  10   6  -1   27.90    5.90
   9  -6  -1  194.98   10.40
  -9  -6   1  193.88   13.60
  -9  -6   1  185.68   12.30
  -9  -6   1  198.98   12.40
  -9  -6   1  198.58   13.40
   9   6  -1  211.28   11.50
  -9   6   1  196.18    9.80
   9   6  -1  180.48   11.50
  -9   6   1  214.38   11.80
  -9   6   1  187.58    9.80
   9   6  -1  194.18   10.70
  -9   6   1  184.28    8.80
  -8  -6   1   49.40    7.80
   8  -6  -1   54.69    6.70
  -8  -6   1   53.39    7.70
  -8  -6   1   61.69    7.80
  -8  -6   1   50.59    7.60
  -8   6   1   42.90    5.60
  -8   6   1   57.39    5.00
  -8   6   1   61.09    7.50
   8   6  -1   67.39    8.10
  -8   6   1   51.99    6.10
   8   6  -1   56.59    7.30
  -7  -6   1   36.80    6.60
  -7  -6   1   23.10    5.80
  -7  -6   1   49.30    9.30
   7  -6  -1   40.50    6.00
  -7  -6   1   36.00    6.30
   7   6  -1   42.50    6.90
  -7   6   1   35.40    5.20
   7   6  -1   40.40    6.70
  -7   6   1   43.50    4.10
  -7   6   1   45.10    6.50
  -7   6   1   43.70    6.40
  -6  -6   1   62.69    7.10
  -6  -6   1   72.79    7.30
   6  -6  -1   65.89    7.40
  -6  -6   1   53.79    8.00
  -6  -6   1   71.49    7.20
  -6   6   1   59.29    4.60
  -6   6   1   62.29    6.80
   6   6  -1   68.79    8.10
   6   6  -1   75.39    8.40
  -6   6   1   73.19    6.40
  -6   6   1   69.29    8.00
   5  -6  -1  334.57   14.60
  -5  -6   1  327.67   14.90
  -5  -6   1  324.97   15.60
  -5  -6   1  295.07   15.80
  -5  -6   1  318.77   14.30
  -5   6   1  325.67   13.60
   5   6  -1  311.57   14.70
  -5   6   1  307.97   10.80
   5   6  -1  334.17   14.90
  -5   6   1  310.87   13.50
  -5   6   1  275.37   14.00
  -5   6   1  303.87   14.30
   4  -6  -1   -0.20    2.30
  -4  -6   1    2.80    3.70
   4  -6  -1    3.70    3.00
  -4  -6   1    0.90    2.60
  -4  -6   1   -1.20    2.40
  -4  -6   1    1.80    3.20
   4   6  -1   -1.60    3.70
   4   6  -1    5.00    4.00
   4   6  -1    1.70    3.60
  -4   6   1   -0.10    2.70
  -4   6   1    0.20    3.60
  -4   6   1    3.40    3.00
  -4   6   1    3.90    3.20
  -4   6   1   -0.50    1.80
   3  -6  -1  466.05   18.00
  -3  -6   1  428.76   16.60
   3  -6  -1  431.66   11.40
  -3  -6   1  472.05   18.40
   3  -6  -1  432.06   14.30
  -3  -6   1  437.16   19.00
   3  -6  -1  451.65   11.50
  -3  -6   1  438.16   16.70
   3   6  -1  423.96   16.70
   3   6  -1  459.55   17.70
  -3   6   1  446.76   17.60
  -3   6   1  443.26   16.90
   3   6  -1  425.76   17.70
  -3   6   1  389.26   17.50
  -3   6   1  420.96   13.80
   3   6  -1  465.85   18.20
  -3   6   1  435.16   16.80
   2  -6  -1   47.10    5.70
   2  -6  -1   52.59    4.90
  -2  -6   1   55.59    6.30
  -2  -6   1   51.29    7.10
  -2  -6   1   47.80    6.60
  -2  -6   1   44.40    5.60
   2  -6  -1   46.60    3.50
   2   6  -1   44.20    6.60
  -2   6   1   59.89    7.20
  -2   6   1   41.10    5.90
   2   6  -1   44.00    6.60
   2   6  -1   41.90    6.00
  -2   6   1   47.10    4.50
   2   6  -1   60.19    6.90
  -2   6   1   49.20    6.00
   1  -6  -1    1.30    2.00
  -1  -6   1    2.50    2.90
   1  -6  -1    2.40    3.00
   1  -6  -1    5.90    2.80
  -1  -6   1    0.60    4.10
  -1  -6   1    5.00    2.80
  -1  -6   1    5.70    3.20
   1  -6  -1    3.30    2.50
  -1  -6   1   -2.20    2.20
  -1   6   1    6.10    3.80
  -1   6   1    1.10    2.40
  -1   6   1    2.10    2.20
   1   6  -1    0.40    3.50
  -1   6   1    3.20    3.20
   1   6  -1    1.40    3.40
   1   6  -1   -0.70    2.80
   1   6  -1    0.80    3.30
  -1   6   1   -0.70    2.90
   0  -6   1  252.87   13.00
   0  -6  -1  242.18   10.30
   0  -6   1  245.58   10.80
   0  -6  -1  240.88    9.90
   0  -6  -1  214.08   12.30
   0  -6   1  245.58    9.70
   0  -6  -1  245.48   11.40
   0  -6   1  225.38   10.80
   0   6  -1  243.18   10.80
   0   6  -1  246.88   12.40
   0   6   1  225.08   12.60
   0   6   1  211.98   11.60
   0   6  -1  239.18   12.80
   0   6  -1  218.28   12.00
   0   6   1  234.78   10.20
   0   6   1  243.78   13.10
  -1  -6  -1  392.16   14.30
  -1  -6  -1  409.36   17.70
   1  -6   1  401.56   12.50
   1  -6   1  399.46   16.90
  -1  -6  -1  381.46   16.80
   1  -6   1  366.96   15.10
  -1  -6  -1  406.76   14.40
  -1  -6  -1  391.46   15.30
   1  -6   1  404.06   14.50
   1   6   1  432.46   17.40
  -1   6  -1  393.56   14.30
  -1   6  -1  380.66   16.30
   1   6   1  403.06   16.20
   1   6   1  366.56   14.20
  -1   6  -1  384.16   16.00
   1   6   1  394.36   16.40
  -1   6  -1  414.76   16.20
  -2  -6  -1   88.79    9.70
  -2  -6  -1   84.89    6.60
   2  -6   1   82.59    8.20
  -2  -6  -1   76.89    6.00
  -2  -6  -1   80.69    7.90
   2  -6   1   82.29    6.60
   2  -6   1   84.59    4.30
  -2   6  -1   78.69    6.00
   2   6   1   78.19    8.90
   2   6   1   80.29    7.50
  -2   6  -1   82.99    7.90
  -2   6  -1   92.89    7.60
   2   6   1   85.39    7.80
  -2   6  -1   85.49    6.80
   2   6   1   78.79    6.60
   3  -6   1  146.29    4.10
  -3  -6  -1  142.49   10.30
  -3  -6  -1  149.39    9.20
  -3  -6  -1  170.68    9.50
   3  -6   1  153.38   10.30
  -3  -6  -1  171.58   11.20
   3   6   1  169.68   10.50
  -3   6  -1  159.88    9.50
   3   6   1  152.08   12.10
  -3   6  -1  163.88    8.30
   3   6   1  147.09    9.20
  -3   6  -1  181.68   10.80
   3   6   1  156.78   10.80
   4  -6   1  445.26   18.00
  -4  -6  -1  444.86   17.30
  -4  -6  -1  430.66   19.50
  -4  -6  -1  440.16   16.90
  -4  -6  -1  458.95   18.90
   4  -6   1  422.46   17.80
   4   6   1  446.66   18.10
  -4   6  -1  457.45   17.00
   4   6   1  440.36   17.50
  -4   6  -1  474.65   15.60
  -4   6  -1  442.76   17.60
   4   6   1  449.46   18.30
   4   6   1  496.15   19.40
   5  -6   1    0.10    3.30
  -5  -6  -1    6.30    3.20
  -5  -6  -1   -1.20    3.90
  -5  -6  -1    4.50    4.10
  -5  -6  -1    2.60    2.90
  -5   6  -1   -1.00    3.30
  -5   6  -1    0.60    2.80
   5   6   1    0.70    3.80
   5   6   1   -5.00    3.50
  -5   6  -1   -0.30    2.30
  -6  -6  -1    0.20    2.80
  -6  -6  -1    3.50    3.40
  -6  -6  -1    8.80    5.10
  -6  -6  -1    0.30    2.80
   6  -6   1    4.60    3.80
   6   6   1    5.40    4.40
  -6   6  -1    2.20    3.10
  -6   6  -1    3.70    3.30
   6   6   1    1.00    4.00
  -6   6  -1    0.80    3.60
  -7  -6  -1   42.10    6.50
  -7  -6  -1   26.40    5.40
  -7  -6  -1   36.10    6.40
  -7  -6  -1   33.70    6.50
   7  -6   1   43.30    6.30
  -7  -6  -1   32.80    6.80
  -7   6  -1   45.10    6.10
  -7   6  -1   22.60    5.30
   7   6   1   38.10    6.20
  -7   6  -1   36.60    5.30
   7   6   1   46.40    7.30
  -8  -6  -1   32.20    6.00
  -8  -6  -1   36.70    7.80
  -8  -6  -1   35.70    7.40
  -8  -6  -1   30.60    6.80
  -8  -6  -1   20.90    5.50
   8  -6   1   36.80    6.10
   8   6   1   33.10    6.90
   8   6   1   40.50    6.70
  -8   6  -1   32.70    5.20
  -8   6  -1   40.70    6.30
  -8   6  -1   29.00    5.10
  -8   6  -1   32.50    5.40
   9  -6   1  136.59    9.20
  -9  -6  -1  127.29   10.00
  -9  -6  -1  114.89   10.20
  -9  -6  -1  129.39   10.80
  -9  -6  -1  124.39   10.40
  -9  -6  -1  136.59   11.20
  -9   6  -1  133.79    9.90
   9   6   1  127.39   10.10
  -9   6  -1  125.39    8.40
  -9   6  -1  132.19    8.50
  -9   6  -1  114.39    8.60
   9   6   1  146.59   10.70
 -10  -6  -1   19.60    6.50
 -10  -6  -1    6.10    5.30
 -10  -6  -1   17.00    6.10
 -10  -6  -1   16.60    5.50
 -10  -6  -1   19.20    5.90
 -10   6  -1   20.70    5.50
  10   6   1   11.50    4.90
  10   6   1   16.30    5.20
  10   6   1   13.20    4.80
 -10   6  -1   13.80    4.00
 -10   6  -1   12.90    4.00
 -11  -6  -1   13.40    6.30
 -11  -6  -1   12.30    5.20
 -11  -6  -1   18.10    6.90
 -11  -6  -1    8.00    5.80
 -11   6  -1   11.60    3.70
 -11   6  -1    9.60    4.80
 -11   6  -1   14.20    4.20
  11   6   1    9.30    5.00
  11   6   1   -3.60    5.30
 -12  -6  -1   11.00    5.80
 -12  -6  -1    5.90    5.00
 -12  -6  -1    8.10    5.40
 -12  -6  -1    2.90    5.50
 -12   6  -1    6.50    3.50
 -12   6  -1    5.60    4.90
  12   6   1   10.40    3.90
 -12   6  -1   13.80    5.30
 -11  -7   1   11.40    6.50
 -11  -7   1   17.10    7.50
  11   7  -1   12.80    5.30
 -11   7   1    9.90    6.00
 -11   7   1    8.40    3.70
 -10  -7   1   86.19   11.20
 -10  -7   1   72.49   10.40
  10  -7  -1   86.19    9.70
 -10  -7   1   86.49   10.10
 -10  -7   1   91.19   11.40
  10   7  -1   88.29   10.50
  10   7  -1   84.19    9.40
 -10   7   1  113.69   17.30
 -10   7   1   83.59    7.50
 -10   7   1   77.49    7.10
   9  -7  -1    6.10    4.20
  -9  -7   1    6.90    5.60
  -9  -7   1    4.90    4.10
  -9  -7   1   11.60    5.50
   9   7  -1   12.40    5.80
   9   7  -1    8.80    5.40
  -9   7   1    7.90    4.10
  -9   7   1    9.90    3.10
  -9   7   1    7.50    3.60
  -9   7   1    9.10    5.30
  -8  -7   1   44.60    7.90
  -8  -7   1   28.70    7.40
   8  -7  -1   27.90    5.80
  -8  -7   1   22.40    6.90
  -8   7   1   26.60    5.10
  -8   7   1   57.89    7.90
   8   7  -1   36.90    7.00
  -8   7   1   34.80    4.40
   8   7  -1   50.89    8.30
  -8   7   1   43.40    6.20
  -7  -7   1   51.99    8.10
   7  -7  -1   46.10    7.10
  -7  -7   1   52.69    8.30
  -7  -7   1   68.39    9.30
  -7   7   1   53.59    5.00
  -7   7   1   49.00    6.60
   7   7  -1   59.19    8.00
   7   7  -1   51.39    8.00
  -7   7   1   46.30    6.50
  -7   7   1   48.60    7.60
  -6  -7   1   76.69   10.80
  -6  -7   1   96.19    8.10
  -6  -7   1   85.79   10.40
   6  -7  -1   83.79    9.20
   6   7  -1   95.49   10.30
  -6   7   1   92.49    9.10
  -6   7   1   74.99    5.60
  -6   7   1   89.39    7.80
  -6   7   1   66.49    7.70
   5  -7  -1   41.20    6.60
  -5  -7   1   28.60    5.60
  -5  -7   1   34.00    5.80
  -5  -7   1   40.40    7.30
   5   7  -1   35.90    6.90
   5   7  -1   34.10    7.00
  -5   7   1   36.20    4.50
  -5   7   1   42.20    6.40
  -5   7   1   32.90    6.60
  -5   7   1   33.50    5.80
   4  -7  -1  123.89    9.40
  -4  -7   1  118.99   10.20
  -4  -7   1  115.39    9.30
   4  -7  -1  126.49    7.50
  -4  -7   1  122.69    9.50
  -4  -7   1  123.49   11.10
   4   7  -1  139.29   11.10
   4   7  -1  123.29   10.10
  -4   7   1  117.39    9.10
  -4   7   1  123.29    9.10
  -4   7   1  124.69   10.40
  -4   7   1  123.79    6.90
  -3  -7   1   71.49    8.00
   3  -7  -1   79.19    3.80
   3  -7  -1   82.59    6.40
  -3  -7   1   85.79    8.00
   3  -7  -1   78.79    3.60
  -3  -7   1   70.29    9.40
   3  -7  -1   79.49    9.60
  -3  -7   1   72.29    7.30
  -3   7   1   70.99    8.30
  -3   7   1  100.69   10.70
   3   7  -1   82.39    9.70
  -3   7   1   72.29    5.70
  -3   7   1  100.09    8.50
  -2  -7   1   43.50    6.30
   2  -7  -1   58.69    7.10
   2  -7  -1   41.40    3.90
  -2  -7   1   51.49    7.10
  -2  -7   1   63.69    8.80
  -2  -7   1   50.69    6.70
   2  -7  -1   48.70    4.10
   2   7  -1   49.40    7.30
  -2   7   1   48.20    5.40
   2   7  -1   55.19    7.80
  -2   7   1   47.40    7.20
  -2   7   1   69.79    8.30
   2   7  -1   48.30    7.40
  -2   7   1   38.10    6.70
   1  -7  -1  105.69    8.60
  -1  -7   1   91.89    7.20
   1  -7  -1   93.39    6.10
   1  -7  -1  106.89    9.30
  -1  -7   1   90.99    7.60
  -1  -7   1   97.89    9.10
   1  -7  -1  106.79    7.10
  -1  -7   1   91.09    7.60
  -1   7   1  102.29    8.40
   1   7  -1  120.49   10.10
   1   7  -1   97.09   11.60
   1   7  -1  100.79    8.00
  -1   7   1  116.49    9.40
  -1   7   1   92.59    6.70
  -1   7   1   89.29    8.50
   1   7  -1  105.29    8.60
   0  -7   1    4.00    2.80
   0  -7  -1    8.10    3.60
   0  -7   1    2.20    3.40
   0  -7  -1    7.00    4.10
   0  -7   1    3.00    3.40
   0  -7   1    4.40    3.40
   0  -7  -1    6.70    3.40
   0  -7  -1    7.90    3.30
   0   7   1    8.10    3.40
   0   7  -1    5.50    4.30
   0   7   1    1.70    4.50
   0   7   1    2.30    4.30
   0   7  -1    6.00    4.90
   0   7  -1    6.00    3.60
   0   7   1    7.60    4.80
   0   7  -1    7.40    4.40
  -1  -7  -1    4.40    4.10
   1  -7   1    7.30    4.20
   1  -7   1   12.10    4.60
   1  -7   1    8.20    2.70
  -1  -7  -1    4.50    4.30
  -1  -7  -1    7.30    3.10
   1  -7   1    6.00    4.30
  -1  -7  -1    1.30    3.60
  -1   7  -1    1.60    3.40
   1   7   1    5.40    3.30
  -1   7  -1    8.10    3.60
   1   7   1   -0.40    3.50
  -1   7  -1   -0.20    4.10
  -1   7  -1    5.00    4.20
   1   7   1   10.50    4.30
   1   7   1    2.20    4.30
   2  -7   1  220.58    7.70
   2  -7   1  209.38   12.80
  -2  -7  -1  200.28   10.80
  -2  -7  -1  215.28   14.20
  -2  -7  -1  230.48   12.30
  -2  -7  -1  185.98   10.60
   2  -7   1  243.68   11.60
   2   7   1  217.68   13.10
  -2   7  -1  199.58   10.20
  -2   7  -1  214.78   13.20
   2   7   1  222.78   12.50
  -2   7  -1  225.58   12.70
  -2   7  -1  219.18   12.20
   2   7   1  228.88   13.90
   2   7   1  202.78   11.10
   3  -7   1   23.50    6.20
  -3  -7  -1   28.60    6.20
  -3  -7  -1   11.50    4.70
  -3  -7  -1   17.40    4.90
   3  -7   1   18.40    4.50
   3   7   1   15.20    4.90
  -3   7  -1   18.40    6.00
  -3   7  -1   25.80    5.20
  -3   7  -1   23.30    4.90
   3   7   1   26.00    6.30
  -4  -7  -1   42.00    6.60
   4  -7   1   48.70    7.80
   4  -7   1   46.70    6.20
  -4  -7  -1   49.50    8.10
  -4  -7  -1   45.80    7.60
   4   7   1   48.80    7.70
  -4   7  -1   52.89    7.30
   4   7   1   57.99    8.40
  -4   7  -1   44.80    6.90
  -4   7  -1   58.29    8.00
  -5  -7  -1   73.29   10.40
   5  -7   1   66.39    8.90
  -5  -7  -1   73.09    8.80
  -5  -7  -1   63.39    8.40
   5   7   1   78.59    9.50
   5   7   1   67.09    9.00
  -5   7  -1   78.59    8.40
  -5   7  -1   82.39    8.00
  -5   7  -1   68.29    8.80
  -6  -7  -1   13.20    6.50
   6  -7   1   20.80    5.80
  -6  -7  -1   17.10    4.70
  -6   7  -1   25.80    5.70
  -6   7  -1   25.70    5.40
  -6   7  -1   22.60    6.00
   6   7   1   15.10    6.80
  -6   7  -1   19.50    4.30
   6   7   1   25.70    6.60
  -7  -7  -1   26.90    5.70
  -7  -7  -1   23.30    5.70
   7  -7   1   19.50    5.70
  -7  -7  -1   31.40    6.90
  -7   7  -1   30.10    6.30
  -7   7  -1   29.20    5.60
  -7   7  -1   17.80    4.50
   7   7   1   22.10    6.50
  -7   7  -1   22.20    5.40
   8  -7   1  142.39   10.40
  -8  -7  -1  118.89   12.10
  -8  -7  -1  134.79   10.50
  -8  -7  -1  135.39   11.60
   8   7   1  133.09   11.50
  -8   7  -1  118.89    8.60
  -8   7  -1  140.89   12.20
  -8   7  -1  113.49    9.30
  -8   7  -1  134.19    9.60
  -9  -7  -1   16.30    6.80
   9  -7   1   11.80    5.20
  -9  -7  -1   16.50    6.30
  -9  -7  -1   20.70    6.10
   9   7   1   15.10    6.50
  -9   7  -1    8.40    3.90
  -9   7  -1   14.40    5.50
   9   7   1    8.10    5.10
  -9   7  -1   14.30    4.50
  10  -7   1   24.10    5.80
 -10  -7  -1   24.80    7.80
 -10  -7  -1    9.60    6.90
 -10  -7  -1   18.60    6.90
  10   7   1   25.00    7.50
  10   7   1   29.80    6.50
 -10   7  -1   25.50    5.40
 -10   7  -1   28.90    7.00
 -10   7  -1   35.50    5.80
 -11  -7  -1   44.80    8.70
 -11  -7  -1   26.60    7.80
 -11  -7  -1   26.10    8.00
 -11   7  -1   25.50    6.50
  11   7   1   16.10    5.20
 -11   7  -1   21.40    5.00
  -9  -8   1   42.20    9.10
  -9  -8   1   48.50    9.00
   9  -8  -1   34.80    6.30
  -9  -8   1   30.30    7.60
  -9   8   1   52.19    8.10
   9   8  -1   32.40    7.80
  -9   8   1   26.10    6.80
  -8  -8   1   29.30    6.90
  -8  -8   1   24.10    6.00
  -8  -8   1   30.10    8.10
  -8  -8   1   27.00    7.10
   8  -8  -1   21.00    6.30
  -8   8   1   26.20    5.80
   8   8  -1   26.30    7.10
  -8   8   1   38.50    7.60
   8   8  -1   36.10    8.20
  -7  -8   1    7.10    4.60
  -7  -8   1    8.30    4.40
  -7  -8   1   10.90    6.70
  -7  -8   1    6.80    4.70
   7   8  -1    7.40    5.70
  -7   8   1   10.40    4.70
  -7   8   1   10.50    4.40
  -7   8   1    2.60    4.70
  -7   8   1    3.10    3.00
   7   8  -1    2.10    5.50
  -6  -8   1   95.69   12.30
  -6  -8   1   84.39   10.10
   6  -8  -1  104.39   10.10
  -6  -8   1   93.49   10.60
  -6  -8   1   89.29    8.90
   6   8  -1   88.19   10.40
  -6   8   1   97.89    9.00
  -6   8   1  116.79   10.70
  -6   8   1   88.99    6.60
  -6   8   1   87.89    9.70
   6   8  -1  105.09   11.60
  -5  -8   1   88.39   10.00
  -5  -8   1   70.99   10.70
  -5  -8   1   80.09    9.90
  -5   8   1   91.49    9.70
  -5   8   1   75.69    6.30
   5   8  -1   75.69    9.60
  -5   8   1   84.99   10.60
  -5   8   1   68.29    8.60
   5   8  -1   69.09   10.00
  -4  -8   1    6.80    6.30
  -4  -8   1   14.60    5.30
  -4  -8   1    5.60    3.90
  -4  -8   1    9.90    4.80
   4  -8  -1    5.60    5.30
   4  -8  -1   12.50    4.30
  -4   8   1   12.90    3.70
  -4   8   1   15.70    5.50
  -4   8   1   18.60    5.70
   4   8  -1    7.70    4.30
   4   8  -1    8.70    5.90
  -4   8   1   10.70    5.80
   3  -8  -1  190.08    6.10
   3  -8  -1  212.08   10.50
  -3  -8   1  190.58   12.40
   3  -8  -1  216.98   13.60
  -3  -8   1  198.28   12.20
  -3  -8   1  186.18   13.70
  -3  -8   1  211.18   12.30
  -3   8   1  189.48   10.00
   3   8  -1  202.78   13.50
  -3   8   1  195.38   12.70
   3   8  -1  195.98   13.30
  -3   8   1  187.78   13.60
  -3   8   1  202.48   12.90
  -2  -8   1  157.38    9.80
  -2  -8   1  156.58   11.10
   2  -8  -1  138.09    6.90
   2  -8  -1  129.19    9.70
  -2  -8   1  128.49   12.40
   2  -8  -1  159.88    9.50
   2  -8  -1  138.09    6.80
  -2  -8   1  148.99   10.30
   2  -8  -1  116.49   11.40
   2   8  -1  149.69   11.80
  -2   8   1  146.59   10.00
  -2   8   1  136.79   11.20
  -2   8   1  112.09   10.50
   2   8  -1  137.29   12.10
  -2   8   1  151.58   11.10
   1  -8  -1    4.00    3.60
  -1  -8   1    1.00    3.40
   1  -8  -1   -1.50    2.90
   1  -8  -1    4.80    3.10
   1  -8  -1   -5.00    2.60
  -1  -8   1   -3.20    4.20
   1  -8  -1   10.10    5.40
  -1  -8   1   -3.50    3.00
  -1   8   1   -2.30    2.80
   1   8  -1   -5.80    2.80
   1   8  -1   -6.50    2.80
   1   8  -1   -0.40    3.30
  -1   8   1    7.00    4.60
  -1   8   1    2.90    4.10
   0  -8   1  147.79    8.30
   0  -8   1  125.09   11.00
   0  -8  -1  143.29    8.70
   0  -8  -1  135.89   12.40
   0  -8   1  139.49   10.70
   0  -8  -1  131.79    8.30
   0  -8  -1  135.99   10.40
   0  -8  -1  133.89    9.20
   0  -8   1  139.29    8.10
   0  -8   1  131.39    9.20
   0   8   1  123.89    9.30
   0   8  -1  123.19   11.00
   0   8   1  141.79   11.20
   0   8   1  120.69   10.90
   0   8  -1  123.89   11.60
   0   8   1  153.28   12.50
   0   8  -1  140.59   11.10
  -1  -8  -1   60.59    8.30
   1  -8   1   76.99    7.50
  -1  -8  -1   74.59    7.10
   1  -8   1  100.89    9.60
   1  -8   1   78.29    5.80
   1  -8   1   69.29    5.60
  -1  -8  -1   68.49    7.60
  -1  -8  -1   62.89    9.60
  -1   8  -1   89.49   10.20
   1   8   1   71.19    9.20
   1   8   1   66.99    9.00
   1   8   1   79.69   10.50
  -1   8  -1   98.49   11.10
  -2  -8  -1    7.30    6.30
  -2  -8  -1    9.00    4.20
  -2  -8  -1   13.60    5.60
   2  -8   1    8.10    2.40
   2  -8   1   12.90    4.40
   2  -8   1   10.10    4.80
  -2   8  -1   -4.40    4.00
   2   8   1    6.90    4.60
  -2   8  -1   12.70    5.90
   2   8   1   16.50    6.00
  -2   8  -1   16.40    5.50
  -3  -8  -1   70.49    8.30
   3  -8   1   87.59   10.90
  -3  -8  -1   77.09   10.30
   3  -8   1   79.29    7.50
  -3  -8  -1   89.99    8.40
   3   8   1   73.59    9.90
  -3   8  -1   81.29    9.40
  -3   8  -1   93.49   10.80
  -3   8  -1   72.69    6.80
   3   8   1   83.99   10.90
  -3   8  -1   85.59    9.70
  -4  -8  -1   40.60    6.90
  -4  -8  -1   23.30    7.70
   4  -8   1   19.90    5.80
   4  -8   1   42.80    6.50
  -4  -8  -1   36.20    7.30
  -4   8  -1   36.70    7.00
  -4   8  -1   37.20    6.80
   4   8   1   49.50    8.70
  -4   8  -1   24.40    5.10
  -4   8  -1   37.20    7.80
   4   8   1   42.30    7.70
  -5  -8  -1   -0.80    4.00
   5  -8   1    5.60    5.10
  -5  -8  -1    0.00    5.60
  -5  -8  -1   -0.20    3.40
  -5   8  -1    6.60    4.70
  -5   8  -1    5.40    4.30
   5   8   1    1.30    5.50
  -5   8  -1   -9.80    3.70
   5   8   1   11.10    4.90
  -5   8  -1   -5.20    3.50
  -6  -8  -1   57.89    8.30
  -6  -8  -1   47.20    9.40
  -6  -8  -1   37.40    6.90
   6  -8   1   47.00    8.30
  -6   8  -1   34.50    6.80
  -6   8  -1   48.50    8.40
   6   8   1   57.19    9.30
   6   8   1   40.30    8.30
  -6   8  -1   52.49    7.70
  -6   8  -1   40.00    6.40
  -7  -8  -1   86.69   10.50
  -7  -8  -1  101.59    9.60
   7  -8   1  100.09   10.00
  -7  -8  -1   77.39   11.90
  -7   8  -1   92.99    9.70
   7   8   1  100.09   11.50
   7   8   1  116.19   13.00
  -7   8  -1   82.69    9.40
  -7   8  -1  107.79   11.70
  -8  -8  -1    4.60    4.50
   8  -8   1    3.80    4.90
  -8  -8  -1    4.70    4.80
  -8  -8  -1   -1.00    5.00
   8   8   1   -0.30    5.20
   8   8   1    1.80    5.40
  -8   8  -1    9.70    5.30
  -8   8  -1   -0.30    3.80
  -9  -8  -1   41.90    7.60
   9  -8   1   41.60    7.90
  -9  -8  -1   35.50    9.40
  -9  -8  -1   33.40    8.20
  -9   8  -1   42.00    8.10
   9   8   1   39.90    8.40
  -9   8  -1   32.20    6.50
   9   8   1   47.30    9.10
  -7  -9   1   59.79   10.00
  -7  -9   1   72.09   10.70
  -7  -9   1   54.39    9.40
  -7  -9   1   40.80    8.70
   7  -9  -1   53.29    9.50
  -7   9   1   48.50    9.10
   7   9  -1   51.59    9.20
   7   9  -1   62.89   10.20
  -7   9   1   61.39    8.30
  -6  -9   1    5.60    5.90
  -6  -9   1    1.50    4.90
   6  -9  -1    8.60    6.20
  -6  -9   1   12.10    6.50
   6   9  -1    4.40    6.30
  -6   9   1   22.00    7.00
   6   9  -1    7.50    7.00
  -5  -9   1   16.10    6.50
  -5  -9   1   23.60    6.60
  -5  -9   1   20.40    6.80
  -5  -9   1    8.00    4.50
   5  -9  -1   28.80    7.20
  -5   9   1    8.80    5.40
   5   9  -1    6.70    6.30
   5   9  -1   22.00    6.90
  -5   9   1   23.50    7.70
  -4  -9   1   35.50    7.30
  -4  -9   1   40.60    8.60
   4  -9  -1   54.79    9.80
  -4  -9   1   45.50    7.80
  -4  -9   1   50.89    8.30
   4   9  -1   49.00    9.70
  -4   9   1   45.30    9.10
   4   9  -1   56.69    9.50
  -4   9   1   60.69    8.90
   3  -9  -1   14.20    4.60
  -3  -9   1   12.30    5.30
   3  -9  -1   10.20    6.50
  -3  -9   1    1.70    5.30
  -3  -9   1    7.40    6.50
  -3  -9   1    6.40    4.40
  -3   9   1   12.20    5.40
   3   9  -1    6.70    6.20
  -3   9   1    7.10    4.10
  -3   9   1    3.50    3.80
  -3   9   1   16.50    6.40
   2  -9  -1   37.90    6.20
  -2  -9   1   45.20    7.40
  -2  -9   1   53.09    7.20
   2  -9  -1   39.10    4.20
  -2  -9   1   51.49    7.80
  -2  -9   1   51.29    9.40
   2  -9  -1   46.70    9.00
  -2   9   1   39.70    8.80
   2   9  -1   44.80    7.80
   2   9  -1   42.20    8.60
  -2   9   1   50.09    8.60
   1  -9  -1   73.19   11.00
   1  -9  -1   89.39   10.40
  -1  -9   1   62.09   10.80
   1  -9  -1   94.29    8.30
  -1  -9   1   82.99    7.70
  -1  -9   1   73.89    9.20
   1   9  -1   67.29   10.40
   1   9  -1   82.49   10.70
  -1   9   1   64.59    9.80
  -1   9   1   94.19   11.20
  -1   9   1   77.99   10.10
   0  -9   1    2.80    4.30
   0  -9   1    9.50    5.50
   0  -9   1    4.60    5.90
   0  -9   1    3.40    3.70
   0  -9  -1    7.00    4.10
   0  -9  -1    5.40    4.20
   0  -9  -1    3.90    4.30
   0  -9  -1   -3.00    5.90
   0  -9  -1    2.90    5.10
   0   9  -1    3.00    4.30
   0   9  -1    1.00    4.00
   0   9   1    8.20    5.10
   0   9   1    6.20    5.50
  -1  -9  -1   60.69    7.50
  -1  -9  -1   51.69   10.20
  -1  -9  -1   46.80    7.10
   1  -9   1   54.89    9.20
   1  -9   1   61.59    8.40
   1  -9   1   56.99    5.40
  -1  -9  -1   45.10    8.20
   1   9   1   49.20    9.70
  -1   9  -1   59.99    9.60
  -1   9  -1   43.80    7.80
   1   9   1   45.10    8.50
  -1   9  -1   72.29    9.40
  -2  -9  -1   83.69    9.70
  -2  -9  -1   85.09    9.60
  -2  -9  -1   99.19   12.40
  -2  -9  -1   86.29   10.50
   2  -9   1   81.89    9.30
  -2   9  -1   80.79   10.70
   2   9   1   90.39   11.40
   2   9   1   90.89   12.40
  -2   9  -1   77.39   10.00
  -2   9  -1  109.89   10.50
  -3  -9  -1    5.00    4.80
   3  -9   1    1.10    5.70
  -3  -9  -1    3.40    5.20
   3  -9   1    3.20    3.90
  -3  -9  -1    0.40    5.10
  -3   9  -1    7.90    6.20
   3   9   1   11.30    5.40
  -3   9  -1    4.20    5.00
   3   9   1   11.10    6.90
  -4  -9  -1   56.79   11.10
   4  -9   1   65.09   10.10
  -4  -9  -1   70.39    8.80
  -4  -9  -1   70.09    9.10
   4  -9   1   45.30    7.00
  -4   9  -1   56.89    8.60
   4   9   1   49.80    9.80
   4   9   1   62.59   10.00
  -4   9  -1   66.09   10.30
  -5  -9  -1   81.89   12.90
  -5  -9  -1   63.79    9.20
   5  -9   1   75.89   10.60
  -5  -9  -1   91.99   11.10
   5   9   1   66.99   10.20
  -5   9  -1   74.09   10.80
   5   9   1   86.39   11.30
  -5   9  -1   78.89   10.00
   6  -9   1    7.10    6.00
  -6  -9  -1   16.30    5.40
  -6  -9  -1   10.30    6.30
  -6  -9  -1   17.60    9.30
  -6   9  -1   11.50    5.90
   6   9   1   13.10    5.90
   6   9   1    0.70    6.10
  -6   9  -1    8.00    6.30
   1 -10  -1    0.40    4.20
  -1 -10   1    5.90    5.90
  -1 -10   1    1.50    5.10
   1 -10  -1    7.00    4.80
   1 -10  -1   -2.00    4.40
  -1 -10   1   -2.90    3.90
  -1 -10   1    8.00    5.30
  -1  10   1    8.30    6.50
   1  10  -1   -0.50    5.50
  -1  10   1   -4.90    5.90
   1  10  -1    4.50    7.10
   0 -10  -1   80.79    7.40
   0 -10   1   79.29   12.60
   0 -10  -1   71.79    9.80
   0 -10   1   74.99    9.60
   0 -10  -1   66.69   10.50
   0  10  -1   77.79   12.30
   0  10  -1   81.99   11.60
   0  10   1   82.49   11.70
   0  10   1   78.89   10.90
   1 -10   1   52.99   10.50
   1 -10   1   62.89    8.80
  -1 -10  -1   51.99   11.50
  -1 -10  -1   53.99    7.00
  -1 -10  -1   52.39    9.10
  -1 -10  -1   64.79    8.20
  -1  10  -1   67.79   11.60
  -1  10  -1   69.39    9.90
   1  10   1   66.39   11.00
   1  10   1   64.99   11.40
 -16   0   2   14.50    5.70
 -16   0   2    6.30    5.80
 -16   0   2    6.10    5.60
 -15   0   2   -3.70    4.20
 -15   0   2    4.60    2.40
 -15   0   2   -1.20    3.90
 -15   0   2   -4.60    4.20
 -14   0   2   50.89    8.00
 -14   0   2   46.70    4.00
 -14   0   2   37.90    7.20
 -14   0   2   52.99    9.30
 -13   0   2    3.20    4.00
 -13   0   2   -0.70    1.60
 -13   0   2    2.30    3.60
 -13   0   2   -0.10    4.00
 -12   0   2  349.37   15.30
 -12   0   2  327.47   13.90
 -12   0   2  310.77    9.70
 -12   0   2  334.97   15.40
 -11   0   2   -0.90    3.00
 -11   0   2   -0.50    3.50
 -11   0   2    4.80    3.70
 -11   0   2    0.30    1.40
 -10   0   2    4.40    3.10
 -10   0   2    1.60    1.10
 -10   0   2    2.80    3.30
  -9   0   2   -0.60    2.60
  -9   0   2   -0.90    2.70
  -9   0   2    0.20    0.90
  -9   0   2    0.20    0.90
  -8   0   2 1754.62   39.40
  -8   0   2 1882.71   45.50
  -8   0   2 1809.02   43.60
  -8   0   2 1780.92   39.40
  -8   0   2 1823.72   45.60
  -7   0   2   -2.10    1.90
  -7   0   2   -0.30    1.60
  -7   0   2   -1.40    1.80
  -6   0   2  652.03   14.90
  -6   0   2  682.23   18.60
  -6   0   2  676.23   19.00
  -6   0   2  643.54   14.80
  -6   0   2  634.44   17.20
   5   0  -2    0.30    0.40
  -5   0   2   -0.30    0.60
  -5   0   2   -0.30    1.10
   5   0  -2    0.00    0.40
  -5   0   2    0.40    1.10
  -5   0   2   -0.60    1.50
  -5   0   2   -0.50    0.50
   4   0  -2 3326.57   83.29
  -4   0   2 3318.57   82.19
  -3   0   2   -1.00    0.90
   3   0  -2    0.10    0.80
  -3   0   2    0.30    0.50
   3   0  -2   -0.80    0.60
  -3   0   2    0.10    0.70
   3   0  -2    0.60    0.80
   3   0  -2   -1.30    0.80
   3   0  -2    0.60    0.70
  -3   0   2    0.10    1.20
  -3   0   2    1.20    0.70
  -2   0   2  277.07    7.00
   2   0  -2  258.67    7.10
   2   0  -2  265.77    7.20
   2   0  -2  266.17    7.00
  -2   0   2  260.77    7.30
  -2   0   2  256.27    7.10
   2   0  -2  259.67    6.10
  -2   0   2  257.37    7.70
  -2   0   2  266.37    6.10
   2   0  -2  246.78    7.60
   2   0  -2  256.57    6.40
  -2   0   2  266.67    6.80
   1   0  -2   -0.90    0.60
  -1   0   2    1.00    0.70
   1   0  -2    0.20    0.80
  -1   0   2   -0.20    0.40
  -1   0   2   -0.30    0.70
   1   0  -2    0.10    0.70
   1   0  -2    0.00    0.80
  -1   0   2   -0.70    0.80
   1   0  -2   -0.80    0.70
  -1   0   2   -0.40    0.70
   0   0  -2    7.50    1.20
   0   0  -2    6.10    1.20
   0   0   2    5.00    1.20
   0   0   2    5.20    1.20
   0   0   2    5.00    1.10
   0   0  -2    4.70    1.30
   0   0  -2    5.60    1.10
   0   0   2    5.50    1.20
   0   0  -2    6.00    1.00
   0   0   2    3.80    1.20
  -1   0  -2   -0.40    0.70
  -1   0  -2    0.10    1.00
   1   0   2   -0.30    0.80
  -1   0  -2   -0.70    1.00
   1   0   2    0.70    1.00
  -1   0  -2    1.40    1.20
   1   0   2    0.20    1.00
  -1   0  -2    1.40    1.20
   1   0   2   -0.40    0.90
   2   0   2   10.70    1.70
  -2   0  -2   12.30    1.70
   2   0   2    8.10    1.60
  -2   0  -2    9.00    1.90
   2   0   2   10.50    1.70
  -2   0  -2    9.70    1.50
   2   0   2    8.60    1.60
  -2   0  -2   10.00    1.90
  -2   0  -2    8.20    1.70
  -3   0  -2    0.60    1.40
  -3   0  -2   -0.50    1.00
   3   0   2    1.10    1.10
  -3   0  -2   -0.40    0.80
  -3   0  -2    1.00    1.20
   3   0   2   -0.30    1.10
  -3   0  -2    1.50    1.30
   3   0   2   -0.10    1.00
   4   0   2 1907.01   44.20
  -4   0  -2 1911.81   44.80
   4   0   2 1939.41   44.50
  -4   0  -2 1847.92   44.30
   4   0   2 1956.60   43.20
  -4   0  -2 1961.70   45.70
  -4   0  -2 1942.11   44.20
  -5   0  -2    0.50    1.70
  -5   0  -2   -0.40    1.40
   5   0   2    1.00    1.30
  -5   0  -2    0.50    1.30
   5   0   2   -0.70    0.70
  -5   0  -2   -1.10    1.20
  -5   0  -2   -0.70    2.10
  -6   0  -2  354.96   11.40
   6   0   2  361.96   11.40
   6   0   2  347.27   10.90
  -6   0  -2  379.86   13.10
  -6   0  -2  351.16   11.70
  -6   0  -2  361.86   12.50
  -6   0  -2  360.96   11.00
  -7   0  -2   -0.20    2.70
  -7   0  -2   -0.10    1.80
  -7   0  -2    0.00    1.50
  -7   0  -2   -1.30    1.70
   7   0   2   -1.10    1.40
   7   0   2    0.80    1.40
  -7   0  -2    0.20    1.50
  -8   0  -2   23.20    3.70
   8   0   2   15.00    2.70
   8   0   2   19.40    2.80
  -8   0  -2   20.00    3.80
  -8   0  -2   17.30    3.20
  -8   0  -2   17.70    3.20
  -9   0  -2    1.70    2.70
   9   0   2    0.30    1.60
  -9   0  -2    0.10    2.20
  -9   0  -2   -0.40    1.90
  -9   0  -2   -0.10    1.90
 -10   0  -2  157.78    7.80
 -10   0  -2  161.28    9.70
 -10   0  -2  159.78    8.10
 -10   0  -2  160.98    7.30
 -10   0  -2  165.58    9.80
 -11   0  -2    0.60    2.50
 -11   0  -2   -0.70    3.80
 -11   0  -2   -0.40    2.00
 -11   0  -2    0.20    3.00
  11   0   2    1.10    2.10
  12   0   2   19.50    3.10
 -12   0  -2   25.80    4.70
 -12   0  -2   24.70    5.70
 -12   0  -2   17.40    4.10
 -12   0  -2   22.10    3.50
 -12   0  -2   34.20    6.70
 -13   0  -2    2.60    4.90
 -13   0  -2    0.80    1.80
 -13   0  -2   -0.40    4.80
 -13   0  -2   -1.30    3.20
 -13   0  -2   -1.20    2.10
 -14   0  -2   10.80    1.90
 -14   0  -2   20.00    7.00
 -14   0  -2   22.00    4.50
 -14   0  -2   32.50    7.60
 -14   0  -2   16.40    2.40
 -15   0  -2    8.10    6.00
 -15   0  -2    5.90    5.80
 -16  -1   2   -3.70    5.30
 -16  -1   2    0.80    2.80
 -16  -1   2   -1.10    5.30
 -16  -1   2   -0.70    4.90
 -16   1   2    7.70    4.90
 -16   1   2   -1.70    4.80
 -16   1   2   -3.90    3.80
 -15  -1   2   45.10    8.40
 -15  -1   2   49.10    8.80
 -15  -1   2   39.50    7.00
 -15  -1   2   56.99    5.80
 -15   1   2   58.19    3.90
 -15   1   2   53.79    7.70
 -15   1   2   52.59    8.30
 -14  -1   2   29.70    5.90
 -14  -1   2   31.00    6.50
 -14  -1   2   16.00    5.20
 -14   1   2   30.20    7.20
 -14   1   2   16.80    2.40
 -14   1   2   20.40    5.50
 -14   1   2   31.50    6.00
 -13  -1   2  157.48   11.20
 -13  -1   2  152.68    7.50
 -13  -1   2  153.28   10.00
 -13   1   2  160.98   11.00
 -13   1   2  150.68   10.10
 -13   1   2  173.98   10.40
 -13   1   2  165.48    5.70
 -12  -1   2   68.69    8.80
 -12  -1   2   57.09    4.50
 -12  -1   2   55.89    2.40
 -12  -1   2   53.79    6.60
 -12  -1   2   50.19    7.10
 -12   1   2   71.99    8.20
 -12   1   2   54.69    7.10
 -12   1   2   53.09    6.50
 -12   1   2   52.79    2.90
 -11  -1   2   15.10    2.80
 -11  -1   2   31.00    6.10
 -11  -1   2   15.30    5.10
 -11  -1   2   20.60    4.50
 -11  -1   2   15.00    2.10
 -11   1   2   22.30    5.10
 -11   1   2   14.60    4.20
 -11   1   2   22.40    4.60
 -10  -1   2  405.96   11.40
 -10  -1   2  395.16   16.00
 -10  -1   2  414.66   12.10
 -10  -1   2  409.26   11.50
 -10  -1   2  401.56   14.70
 -10  -1   2  390.86   16.30
 -10  -1   2  415.86   12.60
  10   1  -2  403.06   10.30
 -10   1   2  427.06   14.80
  10   1  -2  391.16   10.00
 -10   1   2  413.46   15.50
 -10   1   2  414.76   15.20
  -9  -1   2  310.07   10.10
  -9  -1   2  308.97    9.60
  -9  -1   2  338.97   13.60
  -9  -1   2  323.77    9.80
  -9  -1   2  337.17   12.20
   9   1  -2  305.17    8.50
   9   1  -2  314.27   12.30
  -9   1   2  308.17   12.50
  -9   1   2  316.57   13.40
   9   1  -2  307.97    8.70
  -9   1   2  333.87   12.60
  -8  -1   2    5.30    1.80
  -8  -1   2    3.80    2.30
  -8  -1   2    7.10    1.80
  -8  -1   2    4.10    1.70
  -8  -1   2    4.70    2.50
  -8  -1   2    5.70    1.60
   8   1  -2    7.70    2.70
  -8   1   2    3.40    2.40
   8   1  -2    4.80    1.30
  -8   1   2    8.30    2.70
  -8   1   2    5.10    2.50
  -7  -1   2  192.38    6.50
  -7  -1   2  202.98    9.30
  -7  -1   2  196.88    8.00
  -7  -1   2  196.38    6.80
  -7  -1   2  206.88    7.10
  -7  -1   2  201.48    6.90
  -7   1   2  203.28    8.00
   7   1  -2  203.38    6.40
  -7   1   2  211.88    8.40
  -7   1   2  205.48    8.40
   7   1  -2  205.58    6.50
   7   1  -2  213.68    8.50
  -6  -1   2   99.29    4.20
  -6  -1   2  105.69    4.60
  -6  -1   2  105.49    4.50
  -6  -1   2  103.29    4.10
  -6  -1   2  101.79    6.10
  -6  -1   2   97.99    5.00
   6   1  -2  103.59    5.80
  -6   1   2  104.19    5.40
   6   1  -2   95.19    4.00
   6   1  -2   93.79    4.00
  -6   1   2  104.29    5.00
   6   1  -2   95.89    5.10
  -6   1   2  101.79    5.10
  -5  -1   2   25.90    2.20
  -5  -1   2   19.30    1.90
  -5  -1   2   23.30    3.40
  -5  -1   2   19.30    2.10
  -5  -1   2   20.50    2.90
  -5  -1   2   20.10    2.30
  -5  -1   2   22.10    2.60
  -5  -1   2   20.20    2.30
   5   1  -2   20.70    3.00
  -5   1   2   20.20    0.90
  -5   1   2   20.20    0.90
   5   1  -2   20.10    2.10
  -5   1   2   21.90    2.70
   5   1  -2   20.90    1.90
   5   1  -2   19.20    2.60
  -5   1   2   22.70    2.60
   4  -1  -2   13.60    1.10
  -4  -1   2   17.30    2.10
  -4  -1   2   16.10    2.60
  -4  -1   2   17.40    1.90
  -4  -1   2   14.70    1.80
  -4  -1   2   13.60    2.40
  -4  -1   2   15.40    2.00
  -4  -1   2   15.80    1.90
   4   1  -2   14.60    1.20
   4   1  -2   18.90    2.20
   4   1  -2   15.20    1.80
  -4   1   2   13.70    1.20
  -4   1   2   13.70    2.00
  -4   1   2   15.00    1.10
  -4   1   2   16.70    1.70
   4   1  -2   15.60    2.00
  -3  -1   2  727.83   18.70
  -3  -1   2  723.83   17.50
  -3  -1   2  755.82   19.30
  -3  -1   2  724.93   18.20
   3  -1  -2  727.13   17.00
   3  -1  -2  729.53   16.90
   3  -1  -2  711.13   17.70
  -3  -1   2  716.73   17.70
  -3  -1   2  740.63   17.80
   3   1  -2  711.03   18.70
   3   1  -2  719.63   17.10
   3   1  -2  745.93   18.30
  -3   1   2  726.13   17.70
  -3   1   2  740.63   16.90
   3   1  -2  715.43   17.50
  -3   1   2  726.03   16.90
   3   1  -2  734.03   17.40
  -3   1   2  724.53   17.10
   2  -1  -2  149.59    4.80
  -2  -1   2  147.79    5.40
   2  -1  -2  145.09    4.70
  -2  -1   2  145.79    5.10
  -2  -1   2  148.79    5.60
   2  -1  -2  147.69    3.70
  -2  -1   2  148.99    5.40
  -2  -1   2  152.78    5.10
  -2  -1   2  145.49    4.60
   2  -1  -2  145.19    4.90
   2   1  -2  155.78    5.10
   2   1  -2  153.98    5.40
   2   1  -2  144.39    4.60
   2   1  -2  149.79    5.60
  -2   1   2  143.69    4.40
   2   1  -2  151.18    5.50
  -2   1   2  159.08    4.20
   2   1  -2  140.09    4.90
  -2   1   2  147.59    4.80
  -2   1   2  145.69    3.60
  -2   1   2  144.59    5.00
  -2   1   2  148.29    4.70
   1  -1  -2 2425.26   67.49
  -1  -1   2 2377.76   75.29
  -1   1   2 2311.17   67.09
   1   1  -2 2409.06   74.79
   0  -1  -2   65.79    3.00
   0  -1  -2   70.19    3.50
   0  -1  -2   65.89    3.20
   0  -1   2   65.49    3.20
   0  -1  -2   63.89    2.60
   0  -1   2   68.39    3.60
   0  -1  -2   62.19    3.20
   0  -1   2   76.29    3.20
   0  -1   2   64.89    3.20
   0  -1   2   69.99    3.30
   0   1   2   65.59    3.30
   0   1   2   66.79    3.10
   0   1  -2   66.39    3.20
   0   1  -2   69.19    3.30
   0   1  -2   64.49    2.90
   0   1  -2   70.09    3.30
   0   1   2   61.09    3.10
   0   1   2   65.19    2.70
   0   1   2   70.59    3.10
   0   1  -2   62.89    3.40
   1  -1   2   17.40    1.80
   1  -1   2   18.80    2.20
   1  -1   2   22.90    2.10
   1  -1   2   19.70    1.80
   1  -1   2   16.30    2.00
  -1  -1  -2   21.40    2.50
  -1  -1  -2   15.90    2.10
  -1  -1  -2   19.50    2.20
  -1  -1  -2   19.00    1.70
  -1  -1  -2   19.80    2.20
   1   1   2   20.10    2.40
  -1   1  -2   19.70    2.10
  -1   1  -2   21.90    2.10
   1   1   2   18.80    1.80
   1   1   2   18.90    1.80
  -1   1  -2   18.40    2.00
  -1   1  -2   19.40    2.20
  -1   1  -2   22.80    2.50
   1   1   2   18.80    1.60
   1   1   2   21.60    2.10
  -2  -1  -2  144.19    5.60
   2  -1   2  150.78    5.10
  -2  -1  -2  146.69    5.50
   2  -1   2  156.88    5.40
   2  -1   2  148.69    5.80
   2  -1   2  141.79    5.10
  -2  -1  -2  134.49    5.80
  -2  -1  -2  140.89    5.70
  -2  -1  -2  150.18    5.60
  -2   1  -2  144.79    5.30
   2   1   2  147.99    5.40
   2   1   2  145.19    5.80
  -2   1  -2  145.59    5.80
   2   1   2  141.59    5.40
   2   1   2  142.79    5.40
  -2   1  -2  146.79    5.00
  -2   1  -2  147.99    5.80
  -2   1  -2  151.58    5.40
   3  -1   2 1178.78   28.50
   3  -1   2 1180.98   29.30
  -3  -1  -2 1235.48   29.10
   3  -1   2 1235.18   28.60
  -3  -1  -2 1205.98   29.00
  -3  -1  -2 1197.58   29.30
   3  -1   2 1184.68   27.90
  -3  -1  -2 1218.08   29.40
  -3  -1  -2 1158.58   31.60
   3   1   2 1183.38   29.30
   3   1   2 1210.48   29.40
  -3   1  -2 1206.88   28.50
  -3   1  -2 1206.58   28.30
   3   1   2 1244.38   30.20
   3   1   2 1234.48   28.80
  -3   1  -2 1208.08   28.70
  -3   1  -2 1191.18   29.10
  -4  -1  -2  114.39    5.80
  -4  -1  -2  114.19    5.20
  -4  -1  -2  113.79    5.20
  -4  -1  -2   90.39    5.30
   4  -1   2  100.79    4.50
  -4  -1  -2  106.89    5.30
   4  -1   2  104.09    3.90
   4   1   2  110.49    5.20
   4   1   2  101.39    5.20
   4   1   2  110.39    4.90
  -4   1  -2  113.19    5.30
  -4   1  -2  111.49    4.90
  -4   1  -2  116.79    4.80
   4   1   2  103.79    4.90
  -4   1  -2  111.09    4.90
  -5  -1  -2  598.64   17.50
   5  -1   2  639.14   17.30
  -5  -1  -2  640.04   18.50
   5  -1   2  650.43   16.50
  -5  -1  -2  655.93   17.60
  -5  -1  -2  655.43   17.50
   5   1   2  628.94   16.50
   5   1   2  636.94   18.30
   5   1   2  615.94   17.60
  -5   1  -2  636.14   17.50
   5   1   2  634.24   16.60
  -5   1  -2  637.34   17.30
   5   1   2  619.54   17.00
  -5   1  -2  648.44   16.60
  -5   1  -2  610.84   16.80
  -6  -1  -2    9.90    2.60
  -6  -1  -2    7.60    2.60
   6  -1   2    8.80    2.20
  -6  -1  -2   12.00    3.30
   6  -1   2   10.10    1.90
  -6  -1  -2   10.20    2.50
  -6   1  -2    6.30    2.40
   6   1   2    9.10    3.00
  -6   1  -2    7.50    2.10
   6   1   2    4.80    1.50
   6   1   2    8.10    2.30
  -6   1  -2   12.30    2.60
  -6   1  -2    7.90    2.10
  -6   1  -2    9.80    2.30
   6   1   2    7.60    2.00
   6   1   2    7.90    1.70
  -7  -1  -2    3.90    2.20
   7  -1   2    0.00    1.50
  -7  -1  -2   -3.50    1.40
   7  -1   2    0.40    1.30
  -7  -1  -2   -0.80    1.70
  -7  -1  -2   -1.10    2.50
   7   1   2   -2.50    1.70
  -7   1  -2   -0.90    1.40
   7   1   2    0.00    1.70
  -7   1  -2   -3.40    1.40
   7   1   2    1.70    1.30
  -7   1  -2   -0.90    1.70
   7   1   2   -1.30    1.50
  -7   1  -2   -0.40    1.60
  -7   1  -2   -0.50    1.50
   7   1   2    0.30    1.10
  -8  -1  -2   17.50    3.30
  -8  -1  -2   21.00    3.50
  -8  -1  -2    9.70    2.80
   8  -1   2   11.70    2.10
  -8  -1  -2   20.50    4.00
  -8   1  -2   15.20    2.70
   8   1   2   13.00    3.00
  -8   1  -2   18.30    3.50
   8   1   2    8.70    2.40
  -8   1  -2   12.20    2.70
   9  -1   2  240.48    8.00
  -9  -1  -2  234.78   10.10
  -9  -1  -2  261.37   12.30
  -9  -1  -2  265.27   10.30
  -9  -1  -2  238.08    9.80
   9  -1   2  244.68    8.90
  -9  -1  -2  257.37   12.60
  -9   1  -2  246.48   11.10
  -9   1  -2  238.58    9.60
  -9   1  -2  234.58   11.70
  -9   1  -2  246.58    8.90
  -9   1  -2  249.38    9.30
 -10  -1  -2   46.50    6.80
 -10  -1  -2   48.90    6.00
 -10  -1  -2   43.30    5.10
 -10  -1  -2   53.89    4.90
  10  -1   2   40.40    3.80
 -10  -1  -2   41.40    6.60
 -10   1  -2   45.60    3.90
 -10   1  -2   40.00    6.60
 -10   1  -2   45.90    6.80
 -10   1  -2   46.60    5.10
  10   1   2   48.70    4.70
 -11  -1  -2  131.19    9.30
 -11  -1  -2  125.19    9.80
  11  -1   2  133.89    6.10
 -11  -1  -2  143.59    7.70
 -11  -1  -2  131.59    7.90
 -11  -1  -2  140.69    8.20
 -11   1  -2  139.29    9.70
 -11   1  -2  124.09    8.60
 -11   1  -2  135.69    6.30
 -11   1  -2  129.99    7.70
 -11   1  -2  130.39    6.20
  12  -1   2    3.90    1.80
 -12  -1  -2    0.80    3.20
 -12  -1  -2    0.40    2.60
 -12  -1  -2   -0.40    4.70
 -12  -1  -2   -1.60    3.00
 -12  -1  -2    2.50    2.80
 -12   1  -2    3.70    1.90
 -12   1  -2    3.20    2.00
  12   1   2    0.60    2.00
 -12   1  -2    4.40    4.90
 -13  -1  -2   -8.50    2.60
 -13  -1  -2   -0.90    4.80
 -13  -1  -2    4.70    5.50
 -13  -1  -2    2.60    3.60
  13   1   2    1.30    2.20
 -13   1  -2   -0.70    4.70
 -13   1  -2   -5.80    4.20
 -13   1  -2   -0.30    3.20
 -13   1  -2    0.30    1.70
 -13   1  -2    0.40    1.20
 -14  -1  -2   13.30    6.90
 -14  -1  -2   13.90    3.40
 -14  -1  -2   17.40    6.50
 -14  -1  -2    4.50    2.90
 -14  -1  -2   11.40    4.30
 -14   1  -2    2.80    5.50
 -14   1  -2   23.40    6.80
 -15  -1  -2   33.60    8.70
 -15  -1  -2   20.40    5.00
 -15  -1  -2   17.40    7.20
 -15   1  -2   30.20    5.10
 -15   1  -2   31.90    7.80
 -15   1  -2   35.60    8.70
 -15  -2   2    1.20    3.00
 -15  -2   2   -2.50    2.60
 -15  -2   2   -3.40    5.00
 -15  -2   2    8.30    5.40
 -15   2   2   -1.60    1.70
 -15   2   2    1.20    4.40
 -15   2   2    5.90    3.90
 -15   2   2    3.00    4.30
 -14  -2   2   41.40    8.30
 -14  -2   2   44.20    7.30
 -14  -2   2   23.70    2.90
 -14  -2   2   28.10    6.30
 -14  -2   2   31.70    3.20
 -14   2   2   34.50    6.10
 -14   2   2   36.60    3.10
 -14   2   2   35.20    7.10
 -13  -2   2   -0.80    2.70
 -13  -2   2    0.20    1.90
 -13  -2   2   10.10    4.10
 -13  -2   2    5.90    5.20
 -13  -2   2    2.70    2.20
 -13  -2   2    5.00    4.30
 -13   2   2    5.80    4.30
 -13   2   2   -0.20    1.30
 -13   2   2    0.80    3.70
 -13   2   2    0.50    3.90
 -12  -2   2   31.60    7.00
 -12  -2   2   30.60    3.90
 -12  -2   2   33.50    7.10
 -12  -2   2   37.10    4.70
 -12  -2   2   28.10    5.70
  12   2  -2   36.90    3.10
 -12   2   2   33.40    5.90
 -12   2   2   37.10    5.90
 -12   2   2   33.70    5.10
 -12   2   2   34.30    2.30
 -11  -2   2   31.10    5.90
 -11  -2   2   30.00    6.40
 -11  -2   2   36.70    5.60
 -11  -2   2   29.00    3.80
 -11  -2   2   28.60    3.90
 -11  -2   2   27.40    4.10
 -11   2   2   28.00    1.90
 -11   2   2   36.40    5.00
 -11   2   2   25.90    4.90
 -11   2   2   30.70    5.10
  11   2  -2   26.50    3.00
 -10  -2   2    4.10    2.20
 -10  -2   2    4.00    2.60
 -10  -2   2    0.50    3.10
 -10  -2   2    5.50    4.20
 -10  -2   2    2.10    2.60
 -10  -2   2   -1.20    2.00
 -10   2   2    1.50    2.30
 -10   2   2    1.10    2.80
 -10   2   2    1.20    3.10
  10   2  -2    6.80    3.70
  10   2  -2    0.80    1.80
  -9  -2   2   49.00    4.50
  -9  -2   2   52.59    4.40
  -9  -2   2   47.50    4.50
  -9  -2   2   58.39    4.40
  -9  -2   2   49.90    5.40
  -9  -2   2   50.29    6.70
  -9   2   2   50.49    4.80
  -9   2   2   50.39    5.60
   9   2  -2   49.50    3.90
  -9   2   2   53.49    4.70
   9   2  -2   45.70    3.70
   9   2  -2   56.89    7.00
  -8  -2   2  379.96   12.70
  -8  -2   2  409.36   13.20
  -8  -2   2  392.26   12.40
  -8  -2   2  392.06   12.90
  -8  -2   2  387.86   15.00
  -8  -2   2  399.36   13.70
  -8   2   2  396.86   13.10
  -8   2   2  399.06   12.70
   8   2  -2  401.66   12.10
   8   2  -2  386.16   13.80
   8   2  -2  378.86   12.20
  -7  -2   2   14.60    2.80
  -7  -2   2    6.40    3.20
  -7  -2   2   13.40    2.70
  -7  -2   2   11.00    2.90
  -7  -2   2    9.40    2.40
  -7  -2   2   10.60    2.40
   7   2  -2   15.10    3.10
   7   2  -2   12.00    3.00
  -7   2   2   11.50    1.10
  -7   2   2   12.30    1.20
  -7   2   2   13.10    2.50
   7   2  -2   10.40    2.20
   7   2  -2   12.00    2.30
  -6  -2   2  440.06   13.50
  -6  -2   2  443.06   13.00
   6  -2  -2  447.36   11.00
  -6  -2   2  436.56   13.80
  -6  -2   2  457.95   13.70
  -6  -2   2  424.56   13.40
  -6  -2   2  427.86   15.00
   6   2  -2  446.16   11.50
   6   2  -2  432.56   12.90
  -6   2   2  435.26   12.30
   6   2  -2  440.86   13.10
   6   2  -2  428.46   14.90
  -6   2   2  427.36   10.90
   6   2  -2  456.95   13.80
  -6   2   2  439.66   11.10
  -5  -2   2  107.39    6.00
  -5  -2   2   97.09    5.20
  -5  -2   2   99.89    5.50
  -5  -2   2   94.89    5.00
   5  -2  -2   96.49    4.00
  -5  -2   2   95.89    5.10
  -5  -2   2  106.39    5.10
  -5  -2   2   94.39    5.10
  -5   2   2   96.69    3.90
   5   2  -2   95.39    4.30
   5   2  -2   98.19    5.00
   5   2  -2  104.69    4.60
   5   2  -2   98.39    5.80
  -5   2   2   98.69    3.90
  -5   2   2  102.69    4.30
   5   2  -2   93.79    5.00
   4  -2  -2   25.90    2.00
  -4  -2   2   30.90    3.00
  -4  -2   2   31.60    2.70
  -4  -2   2   29.20    3.80
   4  -2  -2   31.50    3.30
  -4  -2   2   31.20    3.60
  -4   2   2   33.50    2.30
   4   2  -2   32.10    2.90
  -4   2   2   26.60    2.20
   4   2  -2   32.30    3.90
  -4   2   2   26.40    2.40
   4   2  -2   27.10    2.50
   4   2  -2   31.40    2.90
   4   2  -2   29.20    2.90
   4   2  -2   31.40    3.50
  -3  -2   2  263.47    9.40
  -3  -2   2  283.97    8.90
  -3  -2   2  289.87    9.70
   3  -2  -2  268.27    8.50
   3  -2  -2  286.07    7.80
  -3  -2   2  277.17    9.80
  -3  -2   2  279.17    9.20
  -3  -2   2  284.87    9.80
   3   2  -2  298.97    9.90
  -3   2   2  277.07    8.20
   3   2  -2  288.47    8.90
  -3   2   2  270.57    8.00
   3   2  -2  284.17   10.30
   3   2  -2  294.97    8.90
  -3   2   2  274.47    6.80
   3   2  -2  283.97    9.90
  -3   2   2  284.27    8.40
  -3   2   2  284.37    8.70
  -3   2   2  283.27    7.90
   3   2  -2  297.57    9.20
   2  -2  -2 4078.99  108.09
   2   2  -2 3966.00  122.09
  -2   2   2 3742.03  106.09
  -1  -2   2  856.11   21.90
  -1  -2   2  856.81   20.90
   1  -2  -2  841.52   21.50
  -1  -2   2  842.32   21.40
   1  -2  -2  829.32   20.80
   1  -2  -2  830.82   20.50
   1  -2  -2  853.41   20.50
  -1  -2   2  844.02   21.20
  -1  -2   2  901.41   21.80
  -1  -2   2  827.52   22.20
  -1   2   2  867.81   21.80
   1   2  -2  887.31   21.60
  -1   2   2  852.81   21.00
   1   2  -2  855.11   21.30
   1   2  -2  839.12   21.00
  -1   2   2  861.11   20.50
  -1   2   2  889.01   21.40
   1   2  -2  841.52   22.20
  -1   2   2  849.81   20.60
   1   2  -2  835.12   21.40
   1   2  -2  850.91   21.80
   0  -2  -2  982.80   25.40
   0  -2  -2 1002.50   24.50
   0  -2   2 1038.80   25.20
   0  -2  -2 1023.70   25.70
   0  -2   2 1041.50   25.60
   0  -2  -2 1033.20   25.10
   0  -2   2  982.60   24.70
   0  -2  -2 1047.20   24.10
   0  -2   2 1029.80   26.00
   0  -2   2 1045.10   25.30
   0  -2  -2 1039.20   24.90
   0  -2   2 1021.20   24.40
   0   2   2 1008.40   25.00
   0   2  -2 1025.00   25.20
   0   2  -2 1008.60   24.90
   0   2   2 1060.79   25.50
   0   2  -2 1028.50   25.20
   0   2  -2 1014.20   24.40
   0   2   2 1008.60   25.80
   0   2  -2 1087.59   26.20
   0   2   2 1041.20   24.50
   0   2   2 1041.40   25.10
   0   2  -2 1056.29   25.70
  -1  -2  -2  156.78    6.20
  -1  -2  -2  153.18    6.10
  -1  -2  -2  155.48    6.50
   1  -2   2  154.88    6.00
  -1  -2  -2  151.68    5.90
   1  -2   2  164.98    6.70
   1  -2   2  151.08    6.30
   1  -2   2  151.58    6.20
  -1  -2  -2  172.38    6.50
  -1  -2  -2  153.68    5.80
   1  -2   2  152.18    5.20
  -1   2  -2  154.08    6.00
   1   2   2  160.78    6.70
  -1   2  -2  151.68    6.30
   1   2   2  164.58    6.50
  -1   2  -2  148.89    5.00
  -1   2  -2  158.08    6.50
   1   2   2  152.28    5.80
   1   2   2  151.88    6.10
  -1   2  -2  161.48    6.00
  -1   2  -2  167.68    6.10
  -2  -2  -2  388.46   12.30
  -2  -2  -2  362.96   12.00
   2  -2   2  393.26   11.50
   2  -2   2  409.66   12.20
   2  -2   2  375.76   11.30
   2  -2   2  383.36   11.90
  -2  -2  -2  383.66   11.60
  -2  -2  -2  394.86   11.90
  -2  -2  -2  375.96   11.70
  -2  -2  -2  399.26   12.20
   2  -2   2  396.36   10.20
  -2   2  -2  391.86   11.90
   2   2   2  403.66   11.60
  -2   2  -2  402.26   11.50
   2   2   2  400.96   12.60
  -2   2  -2  394.96   11.80
   2   2   2  393.56   12.00
  -2   2  -2  383.96   11.90
  -2   2  -2  399.46   10.30
  -3  -2  -2    4.50    2.10
   3  -2   2    5.90    1.70
  -3  -2  -2    5.00    2.10
  -3  -2  -2    6.50    2.00
  -3  -2  -2    1.60    1.80
   3  -2   2    7.40    2.00
  -3  -2  -2    5.80    2.20
   3  -2   2    5.40    1.30
   3  -2   2    5.20    1.70
  -3   2  -2    5.60    1.30
   3   2   2    7.30    2.00
  -3   2  -2    4.80    1.90
   3   2   2    8.90    2.20
   3   2   2    5.90    1.70
   3   2   2    7.30    1.80
  -3   2  -2    3.40    1.80
  -3   2  -2    5.80    2.10
  -3   2  -2    6.20    1.70
   4  -2   2  418.26   12.30
  -4  -2  -2  442.36   13.80
  -4  -2  -2  422.36   13.80
   4  -2   2  444.26   13.40
   4  -2   2  428.86   11.80
  -4  -2  -2  458.55   13.90
  -4  -2  -2  425.16   14.20
  -4  -2  -2  430.36   13.40
  -4   2  -2  412.86   13.50
  -4   2  -2  446.56   11.70
  -4   2  -2  435.76   12.60
   4   2   2  432.76   13.50
  -4   2  -2  441.66   12.80
  -4   2  -2  427.26   13.10
   4   2   2  421.76   14.00
   4   2   2  446.76   13.40
   4   2   2  446.96   13.10
  -5  -2  -2   24.00    3.80
  -5  -2  -2   23.00    3.60
   5  -2   2   25.80    2.80
  -5  -2  -2   24.50    3.80
  -5  -2  -2   25.70    3.50
  -5  -2  -2   30.00    3.80
   5  -2   2   25.50    3.30
   5   2   2   26.40    3.30
  -5   2  -2   25.10    2.60
   5   2   2   26.30    3.30
  -5   2  -2   23.40    3.60
   5   2   2   25.00    3.50
   5   2   2   20.80    3.10
  -5   2  -2   28.20    3.30
  -5   2  -2   27.80    3.30
   5   2   2   24.10    3.40
  -5   2  -2   28.40    3.20
  -6  -2  -2  186.78    8.40
  -6  -2  -2  205.88    9.10
  -6  -2  -2  196.98   10.00
   6  -2   2  194.18    8.20
   6  -2   2  188.08    7.00
  -6  -2  -2  187.58    8.60
  -6  -2  -2  203.68    8.50
  -6   2  -2  200.38    7.80
  -6   2  -2  194.28    7.60
  -6   2  -2  205.18    9.20
   6   2   2  190.38    8.60
   6   2   2  199.38    7.90
   6   2   2  204.08    8.30
   6   2   2  191.58    8.70
  -6   2  -2  190.68    7.70
  -6   2  -2  197.58    7.30
   7  -2   2   10.50    2.60
  -7  -2  -2    7.50    3.50
  -7  -2  -2    8.50    2.80
  -7  -2  -2   16.10    4.10
   7  -2   2   10.80    2.10
  -7  -2  -2    8.20    2.60
  -7  -2  -2    8.10    2.90
   7   2   2    7.60    2.30
   7   2   2   10.60    3.10
  -7   2  -2   11.10    2.30
  -7   2  -2   13.50    2.70
   7   2   2   11.10    2.90
  -7   2  -2   10.20    2.50
   7   2   2   10.00    2.40
   7   2   2   10.80    2.60
  -7   2  -2   13.80    2.70
   8  -2   2  111.19    5.10
  -8  -2  -2  114.49    7.00
  -8  -2  -2  116.49    7.00
  -8  -2  -2  107.99    6.80
  -8  -2  -2  114.79    8.20
  -8  -2  -2  111.79    8.60
  -8   2  -2  113.29    6.00
  -8   2  -2  113.99    5.90
   8   2   2  130.09    7.40
  -8   2  -2  110.19    6.00
  -8   2  -2  111.19    5.90
   8   2   2  109.49    4.80
   8   2   2  106.89    6.40
   8   2   2  111.09    4.90
   8   2   2  105.19    7.20
  -9  -2  -2    2.90    2.70
  -9  -2  -2   -0.70    4.00
   9  -2   2    2.00    1.60
  -9  -2  -2    3.30    3.10
   9  -2   2    4.50    2.00
  -9  -2  -2   -0.50    3.60
  -9  -2  -2    2.70    2.50
  -9   2  -2    2.00    2.40
  -9   2  -2    0.40    2.10
   9   2   2    2.90    2.90
  -9   2  -2    0.60    1.90
  -9   2  -2    2.00    2.90
  -9   2  -2    1.80    2.10
 -10  -2  -2  266.17   13.40
 -10  -2  -2  286.07   11.70
 -10  -2  -2  272.07   11.50
 -10  -2  -2  244.88   11.30
 -10  -2  -2  246.98   13.60
  10  -2   2  262.07    9.20
 -10   2  -2  245.58   11.10
 -10   2  -2  266.47   13.80
 -10   2  -2  255.47    9.30
 -10   2  -2  256.97   10.20
  10   2   2  260.07   11.40
 -11  -2  -2    7.70    3.50
 -11  -2  -2   10.80    3.70
  11  -2   2    8.40    2.20
 -11  -2  -2   12.80    5.40
 -11  -2  -2   11.30    4.30
 -11   2  -2    9.30    2.40
  11   2   2   10.80    3.60
 -11   2  -2   11.20    3.20
 -11   2  -2    6.50    5.20
 -11   2  -2   15.50    4.10
 -11   2  -2    6.20    2.20
  11   2   2    4.30    3.50
 -12  -2  -2   36.10    5.40
 -12  -2  -2   33.00    7.60
  12  -2   2   21.70    3.30
 -12  -2  -2   33.40    5.20
 -12  -2  -2   24.50    6.30
 -12   2  -2   31.40    3.00
 -12   2  -2   33.60    5.60
 -12   2  -2   26.70    4.70
  12   2   2   31.00    4.20
 -12   2  -2   33.50    6.60
 -13  -2  -2    4.10    3.90
 -13  -2  -2    5.30    3.90
 -13  -2  -2    0.40    3.10
 -13  -2  -2    3.60    5.90
  13   2   2   -3.60    2.60
 -13   2  -2    2.00    1.50
 -13   2  -2    8.60    4.00
 -13   2  -2    7.80    5.70
 -14  -2  -2   16.50    4.90
 -14  -2  -2   21.10    7.50
 -14  -2  -2    2.60    4.70
 -14  -2  -2   15.90    4.40
 -14  -2  -2    7.70    6.10
 -14   2  -2    7.50    5.90
 -14   2  -2   23.40    6.90
 -15  -2  -2    9.60    7.00
 -15  -2  -2    2.00    3.40
 -15   2  -2   10.00    4.50
 -15   2  -2    2.90    4.00
 -15   2  -2    8.10    5.10
 -15   2  -2   13.80    6.70
 -15  -3   2   61.79    5.50
 -15  -3   2   62.99    8.80
 -15  -3   2   44.20    9.40
 -15  -3   2   53.59   10.70
 -15  -3   2   64.19    7.30
 -15   3   2   49.90    6.40
 -15   3   2   61.79    8.60
 -14  -3   2   -1.20    5.20
 -14  -3   2   -6.00    5.00
 -14  -3   2    1.90    3.70
 -14  -3   2    4.40    3.90
 -14  -3   2   -1.70    4.30
 -14   3   2    4.00    2.00
 -14   3   2    0.30    3.70
 -14   3   2   -5.30    4.20
 -14   3   2   -0.40    3.30
 -14   3   2    4.50    4.80
 -13  -3   2   88.49    6.60
 -13  -3   2  109.49    8.10
 -13  -3   2   84.39    9.20
 -13  -3   2  103.59    7.20
 -13  -3   2  104.79   10.30
 -13  -3   2   86.79   10.40
  13   3  -2   96.89    6.00
 -13   3   2  113.19    9.30
 -13   3   2  100.39    5.10
 -13   3   2   95.59    7.30
 -13   3   2  102.69    8.70
 -12  -3   2    8.10    4.60
 -12  -3   2   17.10    4.20
 -12  -3   2    0.20    4.70
 -12  -3   2   13.80    3.50
 -12  -3   2   11.40    3.50
 -12  -3   2    7.30    4.50
 -12   3   2    7.50    3.90
 -12   3   2    6.50    3.30
 -12   3   2    9.70    4.60
 -12   3   2    7.00    2.10
  12   3  -2    8.60    2.90
 -11  -3   2    8.70    3.60
 -11  -3   2    3.50    3.60
 -11  -3   2    6.70    3.10
 -11  -3   2   11.90    5.20
 -11  -3   2    5.40    4.00
 -11   3   2   10.00    4.00
 -11   3   2   11.70    4.10
 -11   3   2    7.40    2.90
 -11   3   2   10.90    2.20
 -10  -3   2    6.80    3.00
 -10  -3   2   -0.60    2.80
 -10  -3   2    3.90    3.50
 -10  -3   2    3.10    3.00
 -10  -3   2   -0.50    2.80
 -10   3   2    2.80    2.30
  10   3  -2    4.30    2.60
 -10   3   2    3.10    1.90
 -10   3   2    2.90    2.60
  -9  -3   2  144.99    9.30
  -9  -3   2  141.09    8.40
  -9  -3   2  137.89    7.90
  -9  -3   2  142.29    8.60
  -9  -3   2  136.39    8.10
  -9  -3   2  129.39    7.70
  -9   3   2  122.19    6.00
   9   3  -2  140.49    8.40
  -9   3   2  132.49    4.50
   9   3  -2  118.59    6.80
  -8  -3   2   21.50    3.90
  -8  -3   2   21.50    5.00
   8  -3  -2   18.10    2.10
  -8  -3   2   28.70    5.00
  -8  -3   2   22.40    4.70
   8  -3  -2   18.00    1.90
  -8  -3   2   18.30    3.90
  -8  -3   2   23.40    4.40
  -8   3   2   22.70    3.50
  -8   3   2   24.60    2.40
   8   3  -2   16.20    2.30
  -8   3   2   23.20    2.90
  -8   3   2   18.50    2.10
   8   3  -2   19.80    2.60
   8   3  -2   20.40    4.60
   8   3  -2   19.00    3.30
   8   3  -2   14.50    3.00
  -7  -3   2  350.86   13.20
  -7  -3   2  358.46   13.10
  -7  -3   2  345.77   13.40
  -7  -3   2  345.17   15.90
  -7  -3   2  370.46   12.70
   7  -3  -2  361.46   10.40
  -7  -3   2  340.47   12.60
   7  -3  -2  361.06   10.50
  -7   3   2  357.26   12.40
  -7   3   2  367.26   10.50
   7   3  -2  334.47   12.80
   7   3  -2  368.86   11.20
   7   3  -2  352.46   12.50
   7   3  -2  358.06   14.30
  -7   3   2  355.36   10.30
  -7   3   2  355.06   10.30
  -6  -3   2    2.60    2.50
   6  -3  -2    2.80    1.60
  -6  -3   2    3.50    2.50
  -6  -3   2    1.50    2.10
  -6  -3   2    3.80    2.30
  -6  -3   2    4.90    3.20
   6   3  -2    1.70    1.90
  -6   3   2    3.50    1.70
   6   3  -2    4.00    2.10
   6   3  -2    2.90    1.80
  -6   3   2    3.90    1.40
  -6   3   2    1.90    1.50
   6   3  -2    4.00    2.70
  -6   3   2    3.20    1.60
   6   3  -2    3.60    2.00
   6   3  -2    2.50    2.10
  -6   3   2    4.80    2.10
   5  -3  -2  214.48    8.10
  -5  -3   2  206.38    9.20
  -5  -3   2  243.88    9.80
  -5  -3   2  221.98    9.80
  -5  -3   2  222.68    8.80
   5  -3  -2  213.08    7.80
   5   3  -2  216.98    8.70
   5   3  -2  226.88    9.90
  -5   3   2  213.98    6.80
   5   3  -2  235.78    8.50
   5   3  -2  212.68    8.60
  -5   3   2  216.88    7.70
  -5   3   2  227.18    6.40
  -5   3   2  228.18    7.90
   5   3  -2  200.88    8.80
  -5   3   2  216.28    8.10
   5   3  -2  216.18   10.00
   4  -3  -2  310.37    8.20
  -4  -3   2  325.47   11.70
   4  -3  -2  307.57   10.60
  -4  -3   2  315.77   11.20
   4  -3  -2  312.37   10.30
  -4  -3   2  314.47   11.50
  -4  -3   2  309.57   11.90
  -4  -3   2  317.97   10.70
   4   3  -2  311.57   11.00
  -4   3   2  308.67    8.20
   4   3  -2  298.97   10.40
  -4   3   2  324.07   10.20
   4   3  -2  305.77   10.60
   4   3  -2  320.77   11.10
   4   3  -2  308.57   11.70
  -4   3   2  315.37   10.00
  -4   3   2  308.17   10.10
  -4   3   2  319.37    8.20
  -3  -3   2  131.29    6.20
  -3  -3   2  122.59    6.80
  -3  -3   2  133.89    6.60
   3  -3  -2  131.79    4.60
  -3  -3   2  125.19    6.80
   3  -3  -2  137.59    6.50
  -3  -3   2  130.99    6.90
  -3  -3   2  128.79    6.50
   3  -3  -2  133.19    6.10
   3   3  -2  132.79    6.60
  -3   3   2  139.69    5.80
  -3   3   2  135.39    4.50
  -3   3   2  137.39    6.10
   3   3  -2  134.99    6.50
  -3   3   2  130.99    4.10
   3   3  -2  141.49    6.30
  -3   3   2  122.99    5.50
   3   3  -2  137.99    6.10
   3   3  -2  129.29    6.30
  -3   3   2  133.89    6.00
   3   3  -2  126.79    7.00
  -2  -3   2   20.00    2.90
   2  -3  -2   18.40    1.60
  -2  -3   2   22.20    3.10
  -2  -3   2   20.30    3.30
  -2  -3   2   17.30    3.40
   2  -3  -2   16.90    2.60
   2  -3  -2   19.60    2.10
  -2  -3   2   20.20    3.40
   2  -3  -2   21.70    2.70
  -2  -3   2   15.50    2.80
  -2   3   2   16.90    1.50
   2   3  -2   14.60    2.90
  -2   3   2   19.80    2.60
   2   3  -2   19.20    2.70
  -2   3   2   17.70    2.80
   2   3  -2   19.00    2.90
  -2   3   2   24.70    3.00
   2   3  -2   25.60    3.70
  -2   3   2   18.20    2.80
   2   3  -2   18.00    3.20
  -1  -3   2 1473.05   34.70
  -1  -3   2 1390.76   34.30
   1  -3  -2 1432.66   34.20
  -1  -3   2 1440.16   35.90
  -1  -3   2 1453.75   36.40
   1  -3  -2 1404.16   35.40
  -1  -3   2 1482.35   35.50
   1  -3  -2 1459.05   32.70
   1  -3  -2 1398.96   35.10
  -1  -3   2 1390.76   34.80
   1  -3  -2 1420.66   33.50
  -1   3   2 1431.16   32.80
  -1   3   2 1418.06   35.00
   1   3  -2 1435.26   35.30
  -1   3   2 1471.35   35.80
  -1   3   2 1410.16   34.00
   1   3  -2 1445.26   34.70
  -1   3   2 1405.26   34.60
   1   3  -2 1398.56   34.90
   1   3  -2 1414.06   35.60
   1   3  -2 1485.45   36.60
   0  -3   2  102.09    5.20
   0  -3   2  101.09    5.40
   0  -3  -2  102.29    5.00
   0  -3   2  104.99    4.60
   0  -3  -2   94.39    5.00
   0  -3   2  103.99    5.90
   0  -3  -2   98.69    5.50
   0  -3   2  104.79    5.90
   0  -3   2  112.09    5.30
   0  -3  -2  113.19    5.70
   0  -3  -2  102.49    4.60
   0  -3  -2  111.49    6.00
   0   3   2  106.09    4.90
   0   3   2  115.19    5.90
   0   3   2  108.29    5.90
   0   3  -2  115.89    5.50
   0   3  -2  106.19    5.70
   0   3  -2  107.59    5.40
   0   3  -2  103.29    6.00
   0   3  -2  109.19    6.10
   0   3   2  102.69    4.50
   0   3   2   96.49    5.30
  -1  -3  -2  117.99    5.50
   1  -3   2  121.69    5.80
   1  -3   2  108.89    6.10
  -1  -3  -2  112.59    5.30
   1  -3   2  121.09    6.20
  -1  -3  -2  113.09    5.80
  -1  -3  -2  119.89    6.20
   1  -3   2  108.09    5.70
  -1  -3  -2  103.39    5.90
  -1  -3  -2  122.79    5.90
   1  -3   2  116.09    4.50
   1   3   2  128.79    6.60
   1   3   2  120.89    5.80
  -1   3  -2  122.29    6.00
   1   3   2  114.59    5.90
  -1   3  -2  117.19    6.50
  -1   3  -2  134.19    6.00
   1   3   2  121.79    5.70
  -1   3  -2  118.19    5.60
  -1   3  -2  118.09    6.30
   2  -3   2  144.99    6.60
   2  -3   2  127.19    6.60
  -2  -3  -2  139.49    7.30
   2  -3   2  136.09    6.40
  -2  -3  -2  146.69    6.50
  -2  -3  -2  149.59    7.30
  -2  -3  -2  145.69    6.50
  -2  -3  -2  136.79    6.80
   2  -3   2  134.09    6.60
   2  -3   2  136.09    4.80
  -2  -3  -2  140.49    6.90
  -2   3  -2  143.49    6.50
  -2   3  -2  126.09    6.20
   2   3   2  137.39    6.60
  -2   3  -2  134.69    4.70
  -2   3  -2  144.29    7.00
   2   3   2  143.69    7.50
   2   3   2  136.29    6.20
  -2   3  -2  141.09    6.90
  -2   3  -2  141.19    6.40
   2   3   2  153.98    7.20
  -3  -3  -2  674.63   19.60
  -3  -3  -2  637.44   19.50
  -3  -3  -2  643.74   18.70
  -3  -3  -2  672.83   19.40
   3  -3   2  658.53   15.70
   3  -3   2  682.93   19.10
  -3  -3  -2  650.93   18.90
   3  -3   2  650.63   18.30
   3  -3   2  655.83   19.00
   3   3   2  650.53   18.60
   3   3   2  656.63   19.90
  -3   3  -2  690.53   19.10
  -3   3  -2  653.93   15.70
  -3   3  -2  665.63   18.90
   3   3   2  643.34   19.10
   3   3   2  655.03   18.70
  -3   3  -2  636.34   18.50
  -3   3  -2  649.83   19.20
  -3   3  -2  671.43   18.40
   4  -3   2   19.80    3.00
  -4  -3  -2   18.00    3.70
  -4  -3  -2   21.20    3.80
  -4  -3  -2   15.10    3.40
  -4  -3  -2   20.60    3.70
  -4  -3  -2   17.60    3.10
   4  -3   2   21.20    3.40
  -4   3  -2   23.00    3.50
   4   3   2   15.60    2.90
  -4   3  -2   21.20    3.30
  -4   3  -2   18.20    1.70
   4   3   2   21.10    4.00
   4   3   2   16.90    3.10
   4   3   2   21.20    3.50
   4   3   2   17.70    3.30
  -4   3  -2   20.00    3.40
  -4   3  -2   18.20    2.90
  -5  -3  -2  712.83   21.50
   5  -3   2  731.43   20.80
  -5  -3  -2  699.93   21.60
  -5  -3  -2  712.63   21.20
  -5  -3  -2  728.93   22.30
  -5  -3  -2  740.33   21.60
   5  -3   2  710.13   19.70
   5   3   2  761.82   21.60
   5   3   2  748.93   22.30
   5   3   2  757.42   20.60
  -5   3  -2  730.33   19.90
   5   3   2  731.53   21.20
  -5   3  -2  714.83   21.10
  -5   3  -2  728.23   17.70
  -5   3  -2  721.03   20.50
  -5   3  -2  723.23   20.80
   5   3   2  705.53   21.10
  -6  -3  -2   21.30    4.10
   6  -3   2   24.70    3.90
  -6  -3  -2   32.70    5.10
  -6  -3  -2   28.30    4.60
  -6  -3  -2   24.80    4.20
  -6  -3  -2   25.40    4.60
   6   3   2   27.90    3.80
  -6   3  -2   22.80    2.20
  -6   3  -2   26.30    3.80
  -6   3  -2   22.00    3.40
  -6   3  -2   24.90    4.20
   6   3   2   21.60    4.40
   6   3   2   27.90    4.10
   6   3   2   25.40    4.70
   6   3   2   19.30    3.90
  -6   3  -2   22.70    3.40
  -7  -3  -2   -0.60    2.30
  -7  -3  -2    2.20    2.50
  -7  -3  -2   -0.40    3.10
   7  -3   2    0.10    2.50
  -7  -3  -2   -3.10    2.00
  -7  -3  -2    2.00    2.70
   7  -3   2   -0.60    1.50
   7   3   2    1.70    2.20
   7   3   2    0.30    2.60
  -7   3  -2    1.90    1.50
  -7   3  -2    3.70    2.30
  -7   3  -2    2.20    2.00
  -7   3  -2   -1.20    2.00
   7   3   2   -1.90    1.80
   7   3   2   -0.10    2.00
   7   3   2    1.20    2.20
  -7   3  -2    2.40    2.70
   8  -3   2    0.20    1.80
  -8  -3  -2    2.80    2.80
  -8  -3  -2    0.40    2.70
  -8  -3  -2   -1.00    2.40
  -8  -3  -2   -1.80    2.30
  -8  -3  -2   -4.10    2.30
   8  -3   2   -3.00    2.00
  -8   3  -2   -2.80    1.70
   8   3   2    2.20    2.40
   8   3   2    0.10    2.50
  -8   3  -2    2.30    2.40
  -8   3  -2    0.80    2.40
   8   3   2    0.30    2.50
  -9  -3  -2  202.28   10.40
  -9  -3  -2  198.58   12.20
  -9  -3  -2  173.88   10.30
  -9  -3  -2  179.08   10.00
  -9  -3  -2  194.08   10.30
  -9   3  -2  194.68    7.90
  -9   3  -2  199.28   10.80
  -9   3  -2  188.08    8.80
   9   3   2  205.48   10.50
  -9   3  -2  173.28    8.10
  -9   3  -2  184.48    8.40
 -10  -3  -2    7.50    4.10
 -10  -3  -2    9.10    3.80
 -10  -3  -2   17.10    4.70
 -10  -3  -2   16.40    4.30
  10  -3   2    6.40    2.50
 -10  -3  -2    8.60    4.50
  10   3   2    8.60    3.10
  10   3   2    8.80    3.90
 -10   3  -2   13.00    4.00
 -10   3  -2    7.60    2.70
 -10   3  -2    4.70    2.70
 -10   3  -2    5.90    3.10
 -11  -3  -2  112.49   10.90
  11  -3   2   84.19    5.20
 -11  -3  -2   98.19    7.80
 -11  -3  -2   73.09    6.80
 -11  -3  -2   93.39    8.30
 -11   3  -2   81.29    5.40
 -11   3  -2   93.09   11.20
 -11   3  -2  109.49    6.00
 -11   3  -2  101.99    6.40
  11   3   2   89.29    7.10
 -11   3  -2   80.79   11.20
 -12  -3  -2   23.10    6.40
 -12  -3  -2   39.90    6.10
  12  -3   2   20.90    3.70
 -12  -3  -2   29.50    5.50
 -12  -3  -2   28.70    5.70
 -12  -3  -2   29.90    6.00
 -12   3  -2   24.00    4.30
 -12   3  -2   31.00    4.90
 -12   3  -2   28.50    6.20
  12   3   2   29.40    5.80
 -12   3  -2   25.90    3.20
 -13  -3  -2    0.70    5.40
 -13  -3  -2    6.40    6.00
 -13  -3  -2   -1.00    3.60
 -13  -3  -2    0.20    3.20
 -13  -3  -2    0.60    3.50
 -13   3  -2    1.10    5.40
  13   3   2   -1.80    3.10
 -13   3  -2    1.00    1.60
 -13   3  -2    0.10    3.10
 -14  -3  -2   -1.30    4.00
 -14  -3  -2    8.50    4.30
 -14  -3  -2    5.50    4.10
 -14  -3  -2   -2.80    5.80
 -14   3  -2    0.50    5.50
 -14   3  -2  -10.80    3.00
 -14   3  -2   -1.00    3.50
 -14  -4   2   38.90    6.10
 -14  -4   2   45.60    9.50
 -14  -4   2   35.90    7.70
 -14  -4   2   47.90    7.80
 -14   4   2   44.40    4.70
 -14   4   2   43.00    7.30
 -13  -4   2   15.30    4.80
 -13  -4   2   20.90    6.50
 -13  -4   2    5.70    4.60
 -13  -4   2   15.00    4.40
 -13  -4   2   16.40    4.70
 -13   4   2    9.60    3.10
 -13   4   2    7.80    2.50
 -13   4   2    6.00    2.60
  13   4  -2    6.70    3.60
 -13   4   2   -0.50    4.00
 -13   4   2   13.50    5.40
 -13   4   2   17.70    5.00
 -12  -4   2   66.39    8.10
 -12  -4   2   52.99    8.20
 -12  -4   2   44.90    8.80
 -12  -4   2   49.80    7.10
 -12  -4   2   46.00    6.30
 -12   4   2   69.79    6.80
  12   4  -2   60.29    8.10
 -12   4   2   64.89    8.10
 -12   4   2   52.29    5.00
 -12   4   2   62.19    6.80
 -11  -4   2    4.70    4.00
 -11  -4   2   -2.90    3.80
 -11  -4   2    1.40    3.70
 -11  -4   2    5.00    3.60
 -11  -4   2    3.20    3.50
 -11   4   2    4.70    1.90
 -11   4   2    1.90    1.20
 -11   4   2    1.30    1.00
 -11   4   2   -0.90    3.20
 -11   4   2    2.40    2.70
 -11   4   2   -1.20    2.80
 -11   4   2    3.30    1.90
  11   4  -2   -0.40    3.00
 -10  -4   2   33.10    6.20
 -10  -4   2   42.40    6.90
  10  -4  -2   31.80    2.30
 -10  -4   2   33.20    5.70
 -10  -4   2   29.90    5.20
  10  -4  -2   27.80    3.60
 -10   4   2   34.00    5.00
  10   4  -2   27.90    2.40
  10   4  -2   28.70    2.60
 -10   4   2   28.90    2.60
 -10   4   2   35.50    3.10
 -10   4   2   35.40    2.70
  10   4  -2   39.80    5.20
 -10   4   2   29.10    4.00
  -9  -4   2    2.50    4.10
  -9  -4   2    6.20    3.60
  -9  -4   2   -0.20    3.50
  -9  -4   2    5.20    3.10
   9  -4  -2    2.10    1.90
   9  -4  -2   -0.80    1.60
  -9   4   2    4.50    2.30
  -9   4   2   -0.60    1.60
   9   4  -2    2.70    2.60
  -9   4   2    3.20    1.90
  -9   4   2    2.90    1.20
  -9   4   2    2.40    2.40
   9   4  -2    2.40    2.50
  -9   4   2    0.80    2.90
  -9   4   2    3.60    2.00
  -8  -4   2  425.16   15.50
  -8  -4   2  376.16   15.60
  -8  -4   2  384.86   15.20
  -8  -4   2  378.16   15.60
  -8  -4   2  379.56   16.20
   8  -4  -2  399.16   12.50
   8  -4  -2  381.46   12.10
  -8   4   2  390.76   12.20
   8   4  -2  399.16   13.00
   8   4  -2  379.86   15.10
   8   4  -2  381.26   14.40
  -8   4   2  389.86   13.30
  -8   4   2  367.16   12.40
  -8   4   2  411.36   12.20
  -8   4   2  377.16   15.30
  -7  -4   2   -0.70    2.50
  -7  -4   2   -0.70    2.60
  -7  -4   2    1.10    3.00
  -7  -4   2   -1.00    2.00
   7  -4  -2   -0.80    1.70
   7  -4  -2   -0.50    1.90
  -7  -4   2   -2.30    2.10
   7   4  -2    0.90    2.80
  -7   4   2   -0.30    1.80
   7   4  -2    0.80    2.50
   7   4  -2    1.40    2.60
   7   4  -2    0.90    2.60
  -7   4   2    3.50    2.10
   7   4  -2    1.00    2.50
  -7   4   2    1.30    1.70
   7   4  -2   -0.10    2.00
  -7   4   2   -2.50    2.10
  -6  -4   2  169.98    9.70
  -6  -4   2  184.98   10.10
  -6  -4   2  191.38    9.30
   6  -4  -2  188.88    8.00
  -6  -4   2  178.28    9.50
  -6  -4   2  187.38    9.90
   6  -4  -2  193.18    8.40
   6   4  -2  162.78    8.60
  -6   4   2  181.48    7.90
   6   4  -2  187.48    9.30
   6   4  -2  174.48   10.00
  -6   4   2  178.98    8.30
   6   4  -2  170.38    9.60
  -6   4   2  181.68    6.40
   6   4  -2  171.38    8.90
   6   4  -2  182.98    8.40
  -6   4   2  182.98    7.80
  -5  -4   2   25.00    4.20
   5  -4  -2   30.00    3.90
  -5  -4   2   27.30    4.70
  -5  -4   2   35.80    5.30
  -5  -4   2   21.70    4.60
   5  -4  -2   27.20    4.00
  -5  -4   2   28.40    4.80
   5   4  -2   29.60    4.10
  -5   4   2   26.10    3.70
  -5   4   2   24.10    3.60
  -5   4   2   25.00    2.30
   5   4  -2   28.40    4.10
   5   4  -2   27.80    4.60
   5   4  -2   31.40    5.70
  -5   4   2   35.20    4.10
   5   4  -2   29.60    4.20
   5   4  -2   28.60    4.50
  -4  -4   2  305.57   11.50
   4  -4  -2  296.37    7.50
  -4  -4   2  287.57   12.70
   4  -4  -2  279.57   10.90
  -4  -4   2  299.37   12.20
  -4  -4   2  302.87   12.30
  -4  -4   2  286.57   12.20
   4  -4  -2  299.57   11.60
   4   4  -2  297.77   12.20
  -4   4   2  291.57   10.80
   4   4  -2  305.57   12.10
  -4   4   2  294.77    8.40
   4   4  -2  305.27   12.00
  -4   4   2  301.47   10.60
   4   4  -2  308.17   11.70
  -4   4   2  291.07   10.50
   4   4  -2  300.47   11.30
  -4   4   2  294.97   10.90
   4   4  -2  307.97   11.50
  -3  -4   2   39.70    5.50
  -3  -4   2   37.70    5.10
   3  -4  -2   41.10    2.60
   3  -4  -2   40.30    4.90
  -3  -4   2   36.90    4.70
   3  -4  -2   40.90    4.10
  -3  -4   2   46.90    5.30
   3  -4  -2   44.10    4.10
   3  -4  -2   40.30    2.80
  -3  -4   2   41.90    5.30
  -3   4   2   39.70    4.50
   3   4  -2   37.60    4.70
   3   4  -2   51.69    5.70
   3   4  -2   35.40    4.20
  -3   4   2   38.90    4.20
  -3   4   2   38.30    2.50
  -3   4   2   44.90    4.00
   3   4  -2   39.90    5.00
   3   4  -2   34.90    4.30
  -2  -4   2  277.17   10.70
  -2  -4   2  290.17   10.90
   2  -4  -2  293.47    8.80
   2  -4  -2  289.77   10.30
  -2  -4   2  287.27   12.10
   2  -4  -2  291.37   11.80
   2  -4  -2  295.87    8.60
  -2  -4   2  276.77   11.70
  -2  -4   2  267.37   10.80
   2  -4  -2  280.67   11.00
  -2  -4   2  314.07   11.70
  -2   4   2  285.57   10.60
   2   4  -2  281.37   12.10
  -2   4   2  293.87   10.90
   2   4  -2  300.67   11.50
   2   4  -2  283.07   11.70
  -2   4   2  292.77    8.60
  -2   4   2  287.57   10.90
   2   4  -2  276.17   10.60
   2   4  -2  290.77   11.00
   2   4  -2  287.47   11.00
  -2   4   2  268.57   10.00
   1  -4  -2  125.19    5.50
   1  -4  -2  113.49    5.10
   1  -4  -2  122.09    7.30
   1  -4  -2  126.69    7.10
  -1  -4   2  110.59    5.90
  -1  -4   2  121.39    7.00
   1  -4  -2  125.29    6.40
  -1  -4   2  124.69    7.40
  -1  -4   2  121.49    6.60
  -1  -4   2  126.29    6.40
  -1  -4   2  126.79    6.90
   1   4  -2  133.39    7.60
   1   4  -2  120.89    6.50
  -1   4   2  105.89    6.50
   1   4  -2  121.39    6.60
   1   4  -2  133.09    7.70
  -1   4   2  117.79    5.20
  -1   4   2  124.49    6.90
  -1   4   2  126.59    6.30
  -1   4   2  121.19    6.60
   1   4  -2  133.79    7.20
   0  -4   2    2.90    2.00
   0  -4  -2    2.70    1.80
   0  -4   2    4.60    2.50
   0  -4  -2    2.20    1.70
   0  -4   2    4.00    1.90
   0  -4  -2    1.30    1.50
   0  -4   2   -1.20    1.40
   0  -4  -2    2.00    1.80
   0  -4   2    2.20    2.60
   0  -4   2    3.50    1.90
   0   4  -2    2.30    2.20
   0   4  -2   -0.80    2.00
   0   4  -2    1.10    2.30
   0   4  -2    0.90    2.50
   0   4  -2    3.50    2.40
   0   4   2    3.90    2.40
   0   4   2    2.90    2.40
   0   4   2    0.80    2.40
   0   4   2    4.50    2.20
  -1  -4  -2  131.59    6.40
   1  -4   2  136.29    7.10
  -1  -4  -2  132.19    7.40
  -1  -4  -2  146.79    7.00
  -1  -4  -2  135.19    6.70
   1  -4   2  127.19    7.30
   1  -4   2  136.29    8.00
  -1  -4  -2  145.59    7.70
   1  -4   2  144.79    5.50
  -1  -4  -2  136.39    7.40
   1  -4   2  143.39    6.90
  -1   4  -2  139.49    7.60
  -1   4  -2  136.69    7.10
   1   4   2  125.29    6.40
   1   4   2  149.19    8.00
   1   4   2  137.79    6.50
  -1   4  -2  128.49    7.90
  -1   4  -2  142.89    6.90
   1   4   2  144.19    7.10
   1   4   2  134.99    7.50
   1   4   2  129.59    7.70
  -1   4  -2  130.19    6.70
  -2  -4  -2  159.18    8.50
  -2  -4  -2  176.08    8.00
   2  -4   2  177.58    8.30
  -2  -4  -2  174.08    8.60
   2  -4   2  170.48    8.20
   2  -4   2  184.08    8.40
  -2  -4  -2  173.78    9.00
   2  -4   2  179.38    9.10
   2  -4   2  180.58    5.90
  -2  -4  -2  179.78    8.40
  -2   4  -2  162.98    8.00
   2   4   2  163.68   10.20
   2   4   2  165.58    8.00
  -2   4  -2  175.18    7.80
  -2   4  -2  191.18    8.30
  -2   4  -2  156.48    8.40
  -2   4  -2  169.98    8.70
   2   4   2  163.28    7.90
   2   4   2  174.58    9.10
   2   4   2  169.78    8.60
   3  -4   2   57.29    3.80
   3  -4   2   50.69    4.80
   3  -4   2   45.90    4.40
  -3  -4  -2   50.39    5.70
  -3  -4  -2   48.70    5.30
  -3  -4  -2   60.29    5.20
  -3  -4  -2   57.09    4.70
  -3  -4  -2   47.90    4.90
   3  -4   2   50.09    4.70
   3   4   2   55.79    6.30
   3   4   2   58.39    5.40
   3   4   2   50.89    4.80
   3   4   2   49.80    4.70
  -3   4  -2   53.89    5.20
   3   4   2   54.99    4.60
  -3   4  -2   52.89    4.50
  -3   4  -2   52.19    4.70
  -3   4  -2   61.39    5.40
  -3   4  -2   58.59    4.70
  -4  -4  -2  598.84   19.70
  -4  -4  -2  594.44   18.60
  -4  -4  -2  586.24   19.10
   4  -4   2  587.44   18.80
  -4  -4  -2  560.44   19.40
   4  -4   2  588.54   18.10
  -4  -4  -2  588.84   18.90
   4  -4   2  600.54   18.60
  -4   4  -2  595.74   18.00
   4   4   2  618.74   20.60
  -4   4  -2  573.14   18.50
   4   4   2  592.34   19.60
  -4   4  -2  605.94   19.20
   4   4   2  564.24   18.10
   4   4   2  597.74   20.00
  -4   4  -2  617.24   18.90
  -4   4  -2  573.74   17.90
   4   4   2  574.64   19.00
  -5  -4  -2   49.60    6.30
  -5  -4  -2   48.30    5.90
  -5  -4  -2   38.90    5.40
   5  -4   2   49.60    5.00
  -5  -4  -2   59.29    6.50
  -5  -4  -2   47.50    5.70
   5  -4   2   50.59    4.60
   5   4   2   56.39    6.50
   5   4   2   61.49    5.60
   5   4   2   53.19    7.10
  -5   4  -2   59.19    6.30
  -5   4  -2   50.29    4.70
  -5   4  -2   52.39    5.20
   5   4   2   54.89    5.10
   5   4   2   53.49    6.00
  -5   4  -2   51.69    4.50
  -5   4  -2   57.29    5.30
  -6  -4  -2  143.39    8.90
   6  -4   2  151.08    8.20
  -6  -4  -2  141.09    8.80
   6  -4   2  133.19    6.90
  -6  -4  -2  144.89    8.70
  -6  -4  -2  124.79    8.00
  -6  -4  -2  146.29    8.90
  -6   4  -2  136.09    8.00
   6   4   2  132.49    7.60
   6   4   2  135.79    7.80
   6   4   2  143.09    9.30
   6   4   2  124.39    8.30
  -6   4  -2  129.49    7.70
  -6   4  -2  135.69    9.00
  -6   4  -2  138.59    7.20
   6   4   2  137.69    8.20
  -7  -4  -2   65.89    8.00
  -7  -4  -2   69.39    6.80
  -7  -4  -2   75.79    6.90
   7  -4   2   72.89    6.20
  -7  -4  -2   69.49    6.60
  -7  -4  -2   68.79    6.40
   7   4   2   80.39    6.80
   7   4   2   78.29    6.20
   7   4   2   72.79    6.60
  -7   4  -2   62.29    5.80
   7   4   2   75.79    6.60
  -7   4  -2   75.39    6.50
  -7   4  -2   74.19    2.00
  -7   4  -2   73.09    5.70
  -8  -4  -2  103.49    9.10
  -8  -4  -2   90.59    7.70
  -8  -4  -2   96.79    7.40
   8  -4   2   91.89    6.90
  -8  -4  -2   89.39    8.30
  -8  -4  -2  105.39    8.00
   8   4   2   94.69    7.50
  -8   4  -2   82.99    6.40
  -8   4  -2   93.79    3.60
  -8   4  -2   91.19    6.90
  -8   4  -2  106.49    7.70
   8   4   2  101.69    8.30
   8   4   2   87.99    7.30
   8   4   2  100.99    7.00
  -8   4  -2  100.49    6.50
  -9  -4  -2   29.30    5.60
  -9  -4  -2   25.00    5.20
   9  -4   2   22.10    4.50
  -9  -4  -2   22.00    6.00
  -9  -4  -2   27.20    5.50
  -9   4  -2   26.70    4.30
  -9   4  -2   27.60    2.60
   9   4   2   37.30    4.90
  -9   4  -2   31.80    5.10
   9   4   2   28.20    4.60
   9   4   2   23.30    4.90
  -9   4  -2   21.40    4.10
  -9   4  -2   28.70    2.40
  -9   4  -2   30.80    5.90
 -10  -4  -2  337.97   15.30
 -10  -4  -2  338.77   17.40
 -10  -4  -2  343.27   16.50
 -10  -4  -2  357.96   15.40
 -10   4  -2  326.27   10.10
 -10   4  -2  345.07   13.70
 -10   4  -2  342.97   12.80
  11  -4   2   16.00    3.40
 -11  -4  -2   29.20    5.90
 -11  -4  -2   15.00    5.00
 -11  -4  -2   14.00    5.00
 -11  -4  -2   20.00    5.40
 -11  -4  -2   14.00    6.10
 -11   4  -2   16.20    2.70
 -11   4  -2   14.00    3.30
  11   4   2   13.50    4.40
 -11   4  -2   11.30    4.40
 -12  -4  -2   19.40    7.00
 -12  -4  -2   15.80    5.80
 -12  -4  -2   32.90    5.70
 -12  -4  -2   18.10    6.50
 -12  -4  -2   16.90    5.40
  12   4   2   10.00    4.00
 -12   4  -2   12.00    3.10
 -12   4  -2   13.90    6.50
 -12   4  -2   26.40    5.10
 -12   4  -2   13.30    2.70
 -12   4  -2   15.60    3.30
 -13  -4  -2   40.80    7.10
 -13  -4  -2   52.39    8.90
 -13  -4  -2   47.80    7.80
 -13  -4  -2   41.00    7.20
 -13   4  -2   52.69    9.20
 -13   4  -2   38.90    4.30
 -13   4  -2   48.40    4.00
 -13   4  -2   48.80    6.40
 -14  -4  -2   15.60    8.00
 -14  -4  -2   33.30    8.00
 -14  -4  -2   35.70    7.30
 -14  -4  -2   29.10    6.60
 -14   4  -2   28.10    5.20
 -14   4  -2   27.40    7.70
 -14  -5   2   -1.90    4.70
 -14  -5   2   -0.50    3.90
 -14  -5   2   -2.40    4.20
 -14  -5   2    4.20    5.10
 -14   5   2    2.00    5.00
 -14   5   2    7.50    4.40
 -13  -5   2   57.99    8.10
 -13  -5   2   47.40    8.20
 -13  -5   2   46.20    8.50
 -13  -5   2   64.59   11.50
 -13   5   2   54.89    6.40
 -13   5   2   58.29    6.40
 -12  -5   2    3.60    4.80
 -12  -5   2   -0.50    3.70
 -12  -5   2    4.40    4.10
 -12  -5   2    4.20    4.90
 -12  -5   2    3.90    4.60
 -12   5   2    5.50    3.90
 -12   5   2    4.80    3.20
  12   5  -2    4.70    3.80
 -12   5   2    1.60    1.40
 -12   5   2    0.70    3.10
 -11  -5   2    2.90    3.90
 -11  -5   2   -3.10    3.10
 -11  -5   2    1.60    4.40
  11  -5  -2    0.60    1.50
 -11  -5   2    0.90    5.00
 -11  -5   2    0.00    4.20
  11   5  -2   -5.10    1.90
 -11   5   2    0.10    3.00
 -11   5   2    2.40    2.20
  11   5  -2    2.90    2.20
 -11   5   2    3.00    2.20
  11   5  -2    5.20    3.40
 -11   5   2   -0.60    3.10
 -10  -5   2   24.30    6.10
 -10  -5   2   27.80    6.10
 -10  -5   2   37.80    6.40
  10  -5  -2   19.60    3.50
 -10  -5   2   35.80    7.40
 -10   5   2   24.10    4.00
  10   5  -2   19.80    4.10
 -10   5   2   27.20    4.90
  10   5  -2   26.60    5.10
 -10   5   2   23.80    3.50
  10   5  -2   21.40    3.90
  -9  -5   2   89.79    8.10
  -9  -5   2   74.59    8.20
  -9  -5   2   83.99    8.40
  -9   5   2   67.09    6.60
  -9   5   2   90.79    5.90
  -9   5   2   86.39    5.60
  -9   5   2   88.19    5.90
   9   5  -2   97.89    7.70
   9   5  -2   89.59    7.90
   9   5  -2   94.19    6.70
  -8  -5   2    0.50    3.10
   8  -5  -2   -2.50    2.50
  -8  -5   2    0.50    4.20
  -8  -5   2   -4.00    3.30
   8  -5  -2    0.50    2.40
  -8  -5   2    0.80    3.70
  -8   5   2    1.10    2.50
  -8   5   2   -0.90    1.90
   8   5  -2    2.50    3.00
   8   5  -2    5.80    3.10
  -8   5   2    1.10    3.00
   8   5  -2   -0.80    2.80
  -8   5   2    2.90    2.50
  -8   5   2    1.10    3.60
   7  -5  -2  233.88   10.30
  -7  -5   2  249.18   13.30
  -7  -5   2  244.08   12.00
  -7  -5   2  212.98   12.60
   7  -5  -2  251.77   10.80
  -7  -5   2  241.78   12.60
  -7   5   2  268.37   11.50
   7   5  -2  242.38   11.00
  -7   5   2  258.17    9.30
  -7   5   2  234.08   10.50
  -7   5   2  247.68   10.40
  -7   5   2  243.78   10.30
   7   5  -2  262.07   11.80
   7   5  -2  261.77   12.10
   6  -5  -2   46.30    5.70
  -6  -5   2   48.90    5.90
  -6  -5   2   66.89    7.60
   6  -5  -2   41.20    5.00
  -6  -5   2   59.99    7.30
  -6  -5   2   61.09    7.80
  -6   5   2   53.49    6.20
   6   5  -2   59.19    6.70
  -6   5   2   49.20    3.40
  -6   5   2   48.00    5.40
  -6   5   2   58.69    5.30
  -6   5   2   52.99    5.80
   6   5  -2   54.69    6.70
   5  -5  -2    4.30    3.10
  -5  -5   2    3.70    3.20
  -5  -5   2    5.10    2.80
   5  -5  -2    3.40    2.60
  -5  -5   2    4.20    3.00
  -5  -5   2    0.10    3.50
  -5  -5   2   11.20    4.10
   5   5  -2    3.10    3.30
  -5   5   2    4.50    2.60
   5   5  -2    4.10    3.20
  -5   5   2    1.20    2.30
  -5   5   2    3.30    2.60
   5   5  -2    2.40    3.30
   5   5  -2    7.70    2.90
  -5   5   2    3.60    1.70
   5   5  -2   10.00    4.40
   5   5  -2    6.20    2.70
  -5   5   2   -2.70    2.70
   4  -5  -2   58.19    5.40
  -4  -5   2   58.09    6.60
  -4  -5   2   53.89    6.60
  -4  -5   2   57.99    6.00
  -4  -5   2   62.59    6.00
   4  -5  -2   58.39    6.50
   4  -5  -2   58.29    2.20
   4  -5  -2   57.19    3.70
  -4  -5   2   61.19    7.10
  -4  -5   2   60.09    6.50
  -4   5   2   62.49    5.40
  -4   5   2   53.49    5.20
  -4   5   2   53.59    5.10
  -4   5   2   61.39    5.30
   4   5  -2   61.39    5.70
  -4   5   2   59.19    6.70
   4   5  -2   49.50    4.80
   4   5  -2   58.99    6.70
   4   5  -2   62.79    5.80
  -4   5   2   60.69    3.60
   4   5  -2   62.59    8.00
   3  -5  -2  501.55   17.90
  -3  -5   2  493.65   17.20
   3  -5  -2  502.05   13.30
   3  -5  -2  475.75   17.10
  -3  -5   2  532.75   17.70
  -3  -5   2  467.95   18.00
   3  -5  -2  499.35   14.10
  -3  -5   2  474.05   18.10
   3  -5  -2  516.15   16.60
   3   5  -2  479.85   17.30
   3   5  -2  513.85   20.40
   3   5  -2  517.85   18.20
   3   5  -2  490.75   16.90
  -3   5   2  497.65   17.00
  -3   5   2  516.85   16.80
  -3   5   2  485.25   17.50
  -3   5   2  515.65   16.30
   3   5  -2  496.15   16.80
  -3   5   2  501.75   13.80
   2  -5  -2   21.90    4.70
  -2  -5   2   18.90    4.00
  -2  -5   2   20.50    4.00
  -2  -5   2   20.60    4.20
   2  -5  -2   21.30    4.20
   2  -5  -2   17.90    2.50
  -2  -5   2   12.50    3.20
   2  -5  -2   21.40    2.90
  -2  -5   2   23.30    4.20
   2  -5  -2   16.80    3.80
  -2  -5   2   16.30    4.10
  -2  -5   2   19.50    3.70
   2   5  -2   17.80    4.00
  -2   5   2   26.50    4.50
  -2   5   2   23.70    4.50
   2   5  -2   18.00    3.60
  -2   5   2   20.90    3.80
  -2   5   2   16.40    3.80
   2   5  -2   16.10    4.20
   2   5  -2   14.10    3.70
   2   5  -2   24.70    4.30
  -2   5   2   21.00    4.00
  -2   5   2   20.90    3.20
   1  -5  -2  508.35   18.50
   1  -5  -2  517.25   14.80
   1  -5  -2  524.55   15.10
  -1  -5   2  509.35   16.80
  -1  -5   2  506.35   16.70
  -1  -5   2  527.25   18.90
   1  -5  -2  529.75   16.60
  -1  -5   2  528.35   16.10
  -1  -5   2  503.45   17.50
   1  -5  -2  537.85   18.30
   1   5  -2  509.95   18.40
   1   5  -2  477.05   18.40
   1   5  -2  467.35   16.60
  -1   5   2  524.05   18.70
  -1   5   2  526.05   17.90
  -1   5   2  505.35   14.90
  -1   5   2  495.85   18.30
   1   5  -2  502.75   17.50
   1   5  -2  484.95   16.70
   1   5  -2  490.85   18.60
  -1   5   2  507.45   16.40
  -1   5   2  499.45   17.50
   0  -5  -2   75.19    5.80
   0  -5   2   64.89    5.50
   0  -5  -2   66.99    4.90
   0  -5  -2   79.79    6.80
   0  -5   2   65.39    5.30
   0  -5   2   81.49    5.00
   0  -5   2   75.19    6.50
   0  -5   2   69.09    6.50
   0  -5  -2   71.39    5.00
   0   5  -2   67.59    5.60
   0   5   2   66.19    4.70
   0   5   2   80.09    5.80
   0   5   2   64.69    6.10
   0   5  -2   59.19    5.00
   0   5   2   82.79    6.80
   0   5  -2   71.29    6.40
   0   5   2   69.99    5.70
   0   5   2   63.39    5.90
   0   5  -2   60.79    5.80
   1  -5   2    0.20    2.60
  -1  -5  -2    0.00    2.00
   1  -5   2   -0.50    1.50
   1  -5   2    1.60    2.60
  -1  -5  -2    1.50    2.00
   1  -5   2   -0.90    2.10
  -1  -5  -2    3.50    2.90
  -1  -5  -2    0.00    2.70
  -1  -5  -2   -0.30    2.60
  -1   5  -2    0.80    1.90
   1   5   2    0.20    2.10
   1   5   2   -0.20    2.30
  -1   5  -2    4.00    2.70
  -1   5  -2    2.50    2.50
  -1   5  -2    0.40    2.20
   1   5   2    0.70    1.90
   1   5   2    6.40    3.90
   1   5   2    2.80    2.50
  -1   5  -2    4.10    3.10
   2  -5   2   87.59    7.40
  -2  -5  -2   95.29    8.30
   2  -5   2   89.29    4.30
  -2  -5  -2   87.09    7.40
  -2  -5  -2   86.09    6.20
  -2  -5  -2   85.19    6.40
  -2  -5  -2   93.59    7.50
   2  -5   2   89.39    6.50
  -2   5  -2   97.39    6.50
   2   5   2   86.69    7.30
   2   5   2   88.59    6.10
  -2   5  -2   89.59    6.80
   2   5   2   86.79    6.20
  -2   5  -2   80.89    6.00
   2   5   2   94.59   10.40
   2   5   2   78.39    6.20
   2   5   2   90.89    6.70
  -2   5  -2   84.39    7.20
  -2   5  -2   88.59    6.00
  -3  -5  -2  866.11   26.10
  -3  -5  -2  896.81   25.60
  -3  -5  -2  858.11   28.00
  -3  -5  -2  825.02   26.80
  -3  -5  -2  875.41   25.40
  -3  -5  -2  851.11   26.00
   3  -5   2  871.71   26.70
   3  -5   2  856.61   25.00
   3  -5   2  833.42   25.20
  -3   5  -2  860.91   26.80
   3   5   2  915.51   27.00
   3   5   2  862.51   26.40
   3   5   2  881.61   25.30
  -3   5  -2  876.51   24.50
   3   5   2  879.51   27.40
  -3   5  -2  826.52   25.10
  -3   5  -2  874.51   25.40
   3   5   2  841.02   25.60
  -3   5  -2  915.11   26.70
   4  -5   2    1.60    2.40
  -4  -5  -2    8.70    4.20
  -4  -5  -2    3.10    2.60
   4  -5   2    6.80    3.60
  -4  -5  -2    2.00    3.00
  -4  -5  -2    6.20    3.10
  -4  -5  -2    5.50    3.50
   4   5   2    6.20    3.70
  -4   5  -2    8.30    3.10
  -4   5  -2    6.70    3.60
  -4   5  -2    5.70    3.00
   4   5   2    2.70    2.40
   4   5   2    9.10    3.50
  -4   5  -2    2.00    3.10
  -4   5  -2    5.00    3.50
   4   5   2    7.10    3.90
   4   5   2    4.50    2.70
  -5  -5  -2  156.38    9.10
  -5  -5  -2  131.89    8.90
  -5  -5  -2  155.88   10.30
   5  -5   2  145.49    8.90
  -5  -5  -2  150.28    9.60
  -5  -5  -2  147.49    9.30
   5   5   2  137.19    8.80
  -5   5  -2  145.49    9.10
  -5   5  -2  157.18    8.50
   5   5   2  141.79    9.80
  -5   5  -2  145.59   10.20
   5   5   2  144.49    8.80
   5   5   2  137.59    9.40
  -5   5  -2  141.09    8.20
  -6  -5  -2  120.99    8.40
  -6  -5  -2  134.49    9.60
  -6  -5  -2  143.69   10.00
   6  -5   2  123.09    8.40
  -6  -5  -2  121.29    8.50
  -6  -5  -2  138.09    9.90
  -6   5  -2  134.89    8.20
   6   5   2  130.19    8.30
   6   5   2  143.09    9.10
  -6   5  -2  132.99    7.80
   6   5   2  138.49    9.60
   7  -5   2  134.49    8.50
  -7  -5  -2  127.69    9.40
  -7  -5  -2  132.49    9.80
  -7  -5  -2  121.29    8.70
  -7  -5  -2  145.29   10.80
  -7  -5  -2  150.38    9.90
  -7   5  -2  108.59    9.30
   7   5   2  121.29    9.10
   7   5   2  149.79    8.70
  -7   5  -2  118.99    8.30
  -7   5  -2  126.29    9.30
  -7   5  -2  142.09    8.10
   7   5   2  141.29    9.50
  -8  -5  -2  125.79    9.10
   8  -5   2  148.19    9.20
  -8  -5  -2  137.59   10.10
  -8  -5  -2  126.89    9.90
  -8  -5  -2  130.49   10.60
  -8  -5  -2  144.99   10.40
   8   5   2  125.99    9.10
  -8   5  -2  118.69    8.40
   8   5   2  122.89    9.40
  -8   5  -2  115.49    8.40
   8   5   2  137.69    8.90
  -8   5  -2  134.49    8.10
  -8   5  -2  127.39    8.60
  -9  -5  -2   71.79    9.20
  -9  -5  -2   84.19   10.20
   9  -5   2   78.59    7.00
  -9  -5  -2   77.09    7.50
  -9  -5  -2   90.39    8.70
  -9  -5  -2   94.49    9.80
   9   5   2   99.49    8.50
  -9   5  -2   86.19    7.70
  -9   5  -2   81.09    6.80
  -9   5  -2   78.89    7.10
 -10  -5  -2    5.60    4.50
 -10  -5  -2   -2.70    4.70
 -10  -5  -2   -0.90    4.40
  10  -5   2   -0.40    3.50
 -10  -5  -2   -0.80    4.60
 -10  -5  -2    4.40    4.40
 -10   5  -2    0.50    3.10
  10   5   2    4.90    4.00
  10   5   2    1.40    4.00
  10   5   2    4.60    4.00
 -10   5  -2    1.40    3.80
 -11  -5  -2   35.20    7.20
 -11  -5  -2   42.40    7.40
 -11  -5  -2   27.70    6.40
 -11  -5  -2   49.40    7.90
  11  -5   2   30.10    5.50
 -11  -5  -2   33.30    7.30
 -11   5  -2   43.00    6.30
  11   5   2   21.30    4.90
  11   5   2   37.50    6.60
  11   5   2   27.40    4.70
 -11   5  -2   43.50    5.60
 -12  -5  -2   -4.00    3.90
 -12  -5  -2   -1.10    3.90
 -12  -5  -2   -0.40    5.30
 -12  -5  -2   -0.90    3.80
 -12   5  -2   -1.50    2.80
 -12   5  -2   -5.20    3.10
  12   5   2    1.70    4.50
 -13  -5  -2    3.30    5.00
 -13  -5  -2    4.00    4.40
 -13  -5  -2   -0.30    4.30
 -13  -5  -2   -5.20    5.40
 -13   5  -2   -0.70    2.30
 -13   5  -2    5.30    6.10
 -13   5  -2   -2.90    2.20
 -13   5  -2   -6.30    3.40
 -13  -6   2   -0.20    4.20
 -13  -6   2   -3.90    5.40
 -13  -6   2   -0.10    4.30
 -13   6   2    0.80    3.70
 -13   6   2    3.60    1.60
 -12  -6   2   49.00    8.20
 -12  -6   2   62.69    9.70
 -12  -6   2   48.70    8.60
 -12  -6   2   62.69   11.10
 -12   6   2   57.99    4.70
 -12   6   2   47.60    6.50
 -12   6   2   53.59    4.80
  12   6  -2   38.60    4.00
 -11  -6   2   28.60    7.60
 -11  -6   2   22.70    7.60
 -11  -6   2   27.40    6.70
 -11  -6   2   26.50    6.00
 -11  -6   2   26.90    6.70
  11  -6  -2   16.50    3.90
 -11   6   2   30.60    4.40
  11   6  -2   36.80    6.30
 -11   6   2   26.60    5.60
 -11   6   2   15.00    3.50
 -11   6   2   21.60    3.90
  11   6  -2   24.10    5.30
 -10  -6   2    8.30    5.50
 -10  -6   2    3.70    5.50
 -10  -6   2    6.30    5.30
 -10  -6   2   12.90    5.50
 -10  -6   2    3.80    5.50
 -10   6   2    5.30    3.00
 -10   6   2    8.10    3.30
 -10   6   2    5.30    2.60
  10   6  -2    3.40    4.00
  10   6  -2    6.00    7.80
 -10   6   2    3.50    4.10
  -9  -6   2    6.40    4.20
  -9  -6   2    9.70    5.20
  -9  -6   2   13.50    6.40
  -9  -6   2   11.10    5.00
   9  -6  -2    6.40    4.50
  -9  -6   2   11.60    4.90
  -9   6   2    5.70    4.10
   9   6  -2    2.10    4.30
  -9   6   2   10.60    2.60
   9   6  -2   -1.70    3.60
   9   6  -2   -1.70    3.50
  -9   6   2    8.30    3.40
  -9   6   2    7.50    3.40
  -8  -6   2  184.08   12.90
  -8  -6   2  196.88   13.60
  -8  -6   2  193.58   14.00
  -8  -6   2  222.68   13.10
   8  -6  -2  216.38   11.00
  -8  -6   2  196.98   12.50
  -8   6   2  240.78   11.70
  -8   6   2  208.58   10.30
  -8   6   2  208.38   11.60
   8   6  -2  228.28   12.50
  -8   6   2  207.38   10.30
   8   6  -2  216.18   11.60
   7  -6  -2   26.00    4.90
  -7  -6   2   18.80    6.70
  -7  -6   2   26.10    5.90
  -7  -6   2   21.30    5.10
  -7  -6   2   20.10    5.10
  -7  -6   2   15.70    5.70
   7   6  -2   20.80    5.30
   7   6  -2   31.60    6.00
  -7   6   2   23.30    5.30
  -7   6   2   17.00    4.20
  -6  -6   2   75.39    9.10
   6  -6  -2   67.29    7.50
  -6  -6   2   59.59    8.40
  -6  -6   2   65.39    8.30
  -6  -6   2   65.99    7.80
  -6  -6   2   71.89    6.70
  -6   6   2   62.69    5.90
  -6   6   2   65.49    7.70
  -6   6   2   68.19    6.50
   6   6  -2   47.70    6.60
   6   6  -2   73.89    8.30
  -6   6   2   58.19    7.50
  -5  -6   2  118.39    8.90
   5  -6  -2  123.99    9.00
  -5  -6   2  135.19    9.20
  -5  -6   2  132.09    9.10
  -5  -6   2  135.49   10.70
  -5  -6   2  121.09    9.20
  -5   6   2  131.59    9.40
   5   6  -2  110.19    8.30
  -5   6   2  122.19    8.30
  -5   6   2  100.19    8.50
   5   6  -2  114.39    9.50
  -5   6   2  134.89    8.50
   4  -6  -2   60.19    7.40
  -4  -6   2   56.19    7.80
  -4  -6   2   62.09    7.40
  -4  -6   2   68.29    8.70
   4  -6  -2   59.99    4.50
  -4  -6   2   56.79    7.10
  -4  -6   2   56.59    7.00
  -4   6   2   64.69    7.70
  -4   6   2   74.69    5.00
  -4   6   2   74.79    6.60
   4   6  -2   57.49    6.90
   4   6  -2   51.69    7.10
  -4   6   2   68.79    7.70
  -4   6   2   72.59    7.50
  -4   6   2   70.79    8.20
   4   6  -2   63.59    7.80
   3  -6  -2  140.29    9.50
  -3  -6   2  146.39    9.30
   3  -6  -2  141.39    5.70
   3  -6  -2  150.68    6.90
   3  -6  -2  142.69    8.80
  -3  -6   2  141.49    8.90
  -3  -6   2  137.59    9.90
  -3  -6   2  134.79    9.90
  -3  -6   2  131.39    8.80
  -3   6   2  143.39    9.50
   3   6  -2  128.49   10.90
   3   6  -2  143.99   10.10
  -3   6   2  149.79    8.90
  -3   6   2  147.69    8.60
  -3   6   2  152.88    6.70
  -3   6   2  134.49    8.90
   3   6  -2  145.89    9.40
   3   6  -2  128.79    9.50
  -2  -6   2  391.96   15.40
   2  -6  -2  398.76   12.80
  -2  -6   2  407.96   15.20
  -2  -6   2  378.66   16.40
   2  -6  -2  390.76   14.90
   2  -6  -2  393.76   12.10
   2  -6  -2  399.46   19.90
  -2  -6   2  381.46   14.50
  -2  -6   2  401.36   17.30
  -2   6   2  373.26   14.20
   2   6  -2  377.36   15.20
   2   6  -2  366.06   16.10
   2   6  -2  373.86   16.00
  -2   6   2  365.26   12.50
  -2   6   2  408.86   18.30
   2   6  -2  374.76   15.60
  -2   6   2  380.66   15.40
  -2   6   2  359.66   16.00
   1  -6  -2  220.98   10.80
  -1  -6   2  180.38   11.10
  -1  -6   2  225.38    9.80
   1  -6  -2  230.88   12.80
  -1  -6   2  210.38   10.40
   1  -6  -2  222.28    9.00
  -1  -6   2  234.88   13.10
   1  -6  -2  209.98    8.90
  -1   6   2  203.98    8.90
   1   6  -2  206.38   11.20
  -1   6   2  222.38   11.30
  -1   6   2  209.98   11.20
   1   6  -2  202.48   11.90
  -1   6   2  199.28   10.20
   1   6  -2  210.18   10.30
   1   6  -2  205.88   11.30
  -1   6   2  235.38   12.60
   0  -6   2  125.09    7.90
   0  -6  -2  128.29    8.30
   0  -6   2  108.29    9.40
   0  -6   2  125.49    8.00
   0  -6  -2  117.09    6.70
   0  -6  -2  104.49    9.30
   0  -6   2  103.89    6.20
   0  -6  -2  115.39    6.80
   0   6   2  104.59    8.00
   0   6   2  115.49    6.80
   0   6   2  110.99    8.40
   0   6   2  121.99    9.50
   0   6  -2  110.89    9.10
   0   6   2  106.89    8.30
  -1  -6  -2  451.25   16.30
   1  -6   2  459.95   13.70
   1  -6   2  416.66   16.60
  -1  -6  -2  446.26   15.70
  -1  -6  -2  410.06   18.70
   1  -6   2  464.35   18.40
   1  -6   2  449.95   16.20
  -1  -6  -2  410.96   15.10
   1   6   2  462.65   18.00
   1   6   2  445.96   17.60
  -1   6  -2  470.55   17.50
  -1   6  -2  429.86   17.80
  -1   6  -2  451.55   16.00
   1   6   2  435.86   18.10
   1   6   2  444.06   15.60
   2  -6   2    9.20    2.10
  -2  -6  -2    5.10    3.30
  -2  -6  -2    2.70    3.00
   2  -6   2   12.00    3.70
  -2  -6  -2    0.80    3.00
   2  -6   2    3.30    4.10
  -2  -6  -2    6.00    3.80
  -2   6  -2    2.80    2.80
  -2   6  -2    1.30    3.70
   2   6   2    4.30    3.30
  -2   6  -2    6.70    3.60
   2   6   2    4.60    2.90
  -2   6  -2    4.30    2.90
   2   6   2    6.40    3.50
   2   6   2   -2.00    2.10
  -3  -6  -2   10.70    3.90
  -3  -6  -2    6.80    4.70
  -3  -6  -2    1.60    3.60
  -3  -6  -2    2.00    3.30
  -3  -6  -2    2.80    3.20
   3  -6   2    6.50    3.60
  -3   6  -2   -0.30    3.70
  -3   6  -2    4.90    3.00
   3   6   2    4.10    3.50
  -3   6  -2   -1.60    3.60
   3   6   2   -2.90    2.10
  -3   6  -2    6.30    3.80
   3   6   2    2.80    3.00
  -4  -6  -2  160.38    9.90
  -4  -6  -2  123.59   10.00
  -4  -6  -2  146.19   11.30
   4  -6   2  123.99    9.00
  -4  -6  -2  145.79    9.50
   4  -6   2  150.08    9.10
   4   6   2  142.19    9.90
  -4   6  -2  136.09    9.70
   4   6   2  114.49    9.30
  -4   6  -2  129.29    9.70
   4   6   2  160.08   10.50
  -4   6  -2  126.19    7.90
  -4   6  -2  157.58    9.40
  -5  -6  -2   21.80    4.60
  -5  -6  -2   27.40    6.10
   5  -6   2   21.20    5.20
  -5  -6  -2   24.80    6.50
  -5  -6  -2   29.70    5.30
  -5  -6  -2   23.00    6.00
   5   6   2   26.60    6.30
  -5   6  -2   22.20    5.20
  -5   6  -2   20.60    4.50
   5   6   2   19.40    4.90
  -5   6  -2   19.10    4.70
  -6  -6  -2  173.28   10.90
  -6  -6  -2  159.38   10.40
   6  -6   2  165.48   10.50
  -6  -6  -2  159.38   11.60
  -6  -6  -2  155.98   12.10
  -6  -6  -2  172.68   11.30
  -6   6  -2  159.08   10.80
  -6   6  -2  179.08   10.00
  -6   6  -2  174.48   10.80
  -6   6  -2  156.58    9.50
   6   6   2  199.28   12.30
   6   6   2  179.98   11.50
  -7  -6  -2   24.70    5.50
  -7  -6  -2   38.90    7.00
  -7  -6  -2   35.30    6.90
  -7  -6  -2   40.30    7.20
  -7  -6  -2   35.40    6.90
   7  -6   2   41.80    6.60
   7   6   2   58.09    7.90
  -7   6  -2   40.00    5.90
   7   6   2   37.90    6.80
  -7   6  -2   30.50    5.60
  -7   6  -2   30.80    5.80
  -8  -6  -2   20.10    5.20
  -8  -6  -2   12.70    5.80
  -8  -6  -2   12.10    5.80
  -8  -6  -2   20.90    5.60
  -8  -6  -2   14.90    5.60
   8  -6   2   22.60    5.10
  -8   6  -2   17.90    5.10
   8   6   2   19.90    6.00
  -8   6  -2   13.30    4.00
   8   6   2   13.40    5.20
  -8   6  -2    9.60    4.70
  -9  -6  -2    2.50    4.70
  -9  -6  -2    4.50    3.50
  -9  -6  -2   -0.60    3.60
  -9  -6  -2    1.50    5.10
   9  -6   2   -0.60    3.80
  -9  -6  -2   -3.80    3.60
  -9   6  -2    4.70    4.10
   9   6   2   -0.60    4.10
  -9   6  -2    3.10    3.50
   9   6   2    3.70    4.50
 -10  -6  -2   92.89   10.80
  10  -6   2  100.19    8.90
 -10  -6  -2   97.69   11.60
 -10  -6  -2   97.59   11.00
 -10  -6  -2   85.79   11.20
 -10  -6  -2   90.19   10.30
  10   6   2  115.59   10.40
  10   6   2  108.29    9.60
 -10   6  -2  120.59    9.80
 -10   6  -2   96.39    8.00
 -11  -6  -2    1.10    5.50
 -11  -6  -2   -1.50    4.90
 -11  -6  -2   -5.70    5.00
 -11  -6  -2   -1.00    5.00
 -11   6  -2    3.10    3.80
 -11   6  -2    1.70    4.50
  11   6   2    6.30    4.50
  11   6   2    1.10    4.50
 -11   6  -2    5.30    3.40
 -12  -6  -2    8.50    5.20
 -12  -6  -2   -1.20    5.40
 -12  -6  -2   15.70    7.40
 -12  -6  -2   10.30    6.00
 -12   6  -2    9.00    6.00
 -12   6  -2   13.30    4.00
  12   6   2    9.50    4.90
 -11  -7   2    4.80    5.70
  11   7  -2    2.80    4.80
 -11   7   2    3.50    6.00
 -11   7   2    2.30    3.50
 -10  -7   2   39.10    9.10
 -10  -7   2   31.30    7.30
 -10  -7   2   25.50    7.30
 -10  -7   2   24.10    6.30
 -10   7   2   32.90    5.40
 -10   7   2   42.40    7.10
  10   7  -2   37.60    6.50
  10   7  -2   27.70    6.80
 -10   7   2   38.80    5.70
  -9  -7   2  101.39   12.30
  -9  -7   2  102.39    9.40
  -9  -7   2  117.39   11.40
  -9  -7   2   86.49   11.10
   9  -7  -2  101.49    8.80
  -9   7   2  113.29    8.40
  -9   7   2   92.29   10.20
   9   7  -2   95.89   10.40
   9   7  -2   93.19    9.90
  -9   7   2   96.29    7.90
  -8  -7   2    1.60    4.90
   8  -7  -2   -0.50    4.10
  -8  -7   2   -3.40    2.80
  -8  -7   2    6.20    5.50
  -8  -7   2    2.00    3.70
   8   7  -2    5.60    5.00
   8   7  -2   -4.30    4.40
  -8   7   2   -2.70    2.90
  -8   7   2   -0.20    3.70
  -8   7   2    0.00    3.30
   7  -7  -2   81.39    9.10
  -7  -7   2   77.99   10.30
  -7  -7   2   58.79    8.20
  -7  -7   2   84.49    7.90
  -7  -7   2   75.89   10.20
  -7   7   2   64.99    5.60
  -7   7   2   69.69    8.90
   7   7  -2   73.29    9.10
  -7   7   2   62.39    7.30
  -7   7   2   74.09    7.00
   7   7  -2   88.69    9.50
   6  -7  -2  109.79    9.50
  -6  -7   2  114.69   11.10
  -6  -7   2  115.39    9.70
  -6  -7   2  126.19   10.50
  -6  -7   2  117.49   10.20
   6   7  -2  124.99   13.10
   6   7  -2  131.89   10.70
  -6   7   2  122.59    8.90
  -6   7   2  134.89   10.50
  -6   7   2  112.19    5.80
  -6   7   2  126.59    9.00
  -5  -7   2   24.60    6.00
  -5  -7   2    8.00    4.00
   5  -7  -2    8.80    4.90
  -5  -7   2   13.10    5.80
  -5  -7   2   15.00    4.60
   5   7  -2   21.20    5.50
   5   7  -2    9.10    4.60
  -5   7   2   19.50    5.00
  -5   7   2   16.10    2.90
  -5   7   2   16.60    5.50
  -5   7   2   12.90    4.40
  -4  -7   2   14.70    4.30
   4  -7  -2   17.70    3.60
  -4  -7   2   11.10    5.50
   4  -7  -2   22.90    6.00
  -4  -7   2   11.50    5.00
   4   7  -2   11.00    4.60
  -4   7   2   16.50    4.80
   4   7  -2   22.20    5.30
  -4   7   2   17.70    5.70
  -4   7   2   11.70    2.90
  -4   7   2   21.40    5.10
   3  -7  -2   72.59    4.40
   3  -7  -2   77.89    4.40
  -3  -7   2   91.59    8.20
  -3  -7   2   79.79    7.50
   3  -7  -2   87.09    8.40
   3  -7  -2   76.09    5.70
  -3  -7   2   78.49    9.50
  -3  -7   2   70.99    8.40
  -3   7   2   81.49    8.90
  -3   7   2   85.89    8.00
  -3   7   2   77.29    5.60
   3   7  -2   83.29    9.70
  -3   7   2   79.79    9.80
  -2  -7   2   16.30    4.30
  -2  -7   2    9.80    5.60
   2  -7  -2   11.50    6.40
   2  -7  -2   14.50    3.50
  -2  -7   2    8.00    3.60
   2  -7  -2   10.30    2.90
   2  -7  -2   18.10    5.20
  -2  -7   2   18.30    5.00
   2   7  -2    8.80    5.00
  -2   7   2   12.90    3.50
   2   7  -2    9.40    4.00
  -2   7   2   16.70    4.60
  -2   7   2   19.60    6.30
  -2   7   2   14.00    4.10
   2   7  -2   20.10    5.50
   1  -7  -2  263.17   12.50
   1  -7  -2  281.37   15.60
  -1  -7   2  262.17   11.60
   1  -7  -2  263.17   10.60
  -1  -7   2  240.98   12.30
  -1  -7   2  249.28   15.00
  -1  -7   2  273.37   13.40
  -1   7   2  259.37   11.00
   1   7  -2  268.27   14.70
  -1   7   2  251.87   14.70
   1   7  -2  260.77   13.90
  -1   7   2  259.97   13.40
  -1   7   2  239.78   13.30
   0  -7  -2   26.60    5.60
   0  -7  -2   22.60    4.30
   0  -7   2   24.90    5.50
   0  -7  -2   22.50    6.70
   0  -7   2   28.80    6.80
   0  -7   2   23.30    4.10
   0  -7  -2   29.30    4.90
   0  -7   2   38.70    6.00
   0   7  -2   20.10    5.00
   0   7  -2   33.80    6.30
   0   7   2   21.60    4.30
   0   7   2   27.30    6.00
   0   7   2   20.80    4.80
   0   7  -2   26.20    5.70
   0   7  -2   24.10    5.60
   0   7   2   34.70    6.70
   1  -7   2    1.10    2.30
   1  -7   2   -2.80    3.20
  -1  -7  -2    2.20    3.50
  -1  -7  -2   -0.70    3.30
   1  -7   2   -2.20    4.20
  -1  -7  -2    6.30    4.30
   1   7   2    2.50    4.50
  -1   7  -2   -1.20    3.30
   1   7   2    0.80    4.10
  -1   7  -2   -0.70    2.80
   1   7   2    3.50    4.80
  -1   7  -2    8.30    4.30
   1   7   2   -1.50    2.70
  -1   7  -2    0.60    3.30
   2  -7   2  186.68    7.30
  -2  -7  -2  175.98   10.10
   2  -7   2  197.98   13.00
   2  -7   2  195.28   10.90
  -2  -7  -2  203.38   10.50
  -2  -7  -2  194.48   11.00
  -2  -7  -2  208.58   14.00
  -2   7  -2  185.28   11.30
  -2   7  -2  182.08   10.10
   2   7   2  202.78   12.70
   2   7   2  196.88   12.20
  -2   7  -2  186.38   11.90
   2   7   2  195.68   12.60
  -2   7  -2  193.08   11.70
  -3  -7  -2   92.79   10.80
   3  -7   2  104.29    8.20
  -3  -7  -2   86.99    7.70
  -3  -7  -2   78.49    8.80
  -3   7  -2   85.09    9.80
   3   7   2   79.19    9.40
   3   7   2  110.79   10.30
  -3   7  -2  102.39    8.80
  -3   7  -2   94.69    7.40
  -4  -7  -2   21.20    5.30
  -4  -7  -2   14.90    5.50
   4  -7   2   18.60    4.90
  -4  -7  -2    2.70    5.80
   4  -7   2   18.10    5.10
  -4   7  -2   15.60    5.50
  -4   7  -2   19.40    4.80
   4   7   2   19.50    7.30
  -5  -7  -2  224.78   12.70
   5  -7   2  208.98   12.90
  -5  -7  -2  190.98   11.60
  -5  -7  -2  191.38   14.30
   5   7   2  208.98   13.40
  -5   7  -2  199.98   12.80
  -5   7  -2  194.88   10.60
  -5   7  -2  214.08   11.90
  -6  -7  -2  104.79   12.40
  -6  -7  -2   90.79   12.10
  -6  -7  -2  105.79    8.90
  -6   7  -2  104.39    8.70
  -6   7  -2  100.69    8.20
   6   7   2  106.29   10.40
   6   7   2  134.59   11.40
  -6   7  -2  114.89   10.00
  -7  -7  -2   42.80    8.20
   7  -7   2   37.90    7.10
  -7  -7  -2   52.89    8.50
  -7  -7  -2   42.20    7.10
  -7   7  -2   60.89    7.50
   7   7   2   49.10    8.30
   7   7   2   49.20    9.60
  -8  -7  -2   54.39    7.80
  -8  -7  -2   50.89    8.00
  -8  -7  -2   38.20    8.90
   8  -7   2   47.60    7.80
   8   7   2   58.19    8.50
   8   7   2   54.99    8.90
  -8   7  -2   41.70    6.50
  -8   7  -2   53.89    8.00
  -8   7  -2   49.70    6.90
  -9  -7  -2   69.79   10.40
   9  -7   2   54.59    8.10
  -9  -7  -2   57.09    9.10
  -9  -7  -2   46.10    8.40
  -9   7  -2   48.10    7.00
  -9   7  -2   60.29    7.50
   9   7   2   56.49    8.60
   9   7   2   59.69    8.30
  -9   7  -2   54.49    8.50
 -10  -7  -2    4.60    6.50
  10  -7   2   -6.30    4.00
 -10   7  -2   -1.00    4.10
 -10   7  -2    1.30    5.10
  10   7   2    1.40    5.60
  -9  -8   2   23.70    7.60
   9  -8  -2   45.00    7.40
  -9  -8   2   29.40    7.40
  -9  -8   2   17.80    6.50
  -9  -8   2   34.70    7.90
  -9   8   2   27.00    6.80
   9   8  -2   28.20    7.30
   9   8  -2   37.20    8.80
   8  -8  -2   81.99    9.70
  -8  -8   2   90.09   11.00
  -8  -8   2   78.49   11.20
  -8  -8   2   76.39   10.70
  -8  -8   2   60.09    9.40
   8   8  -2   72.99    9.50
  -8   8   2   86.29   10.30
   8   8  -2  101.19   11.70
  -8   8   2   74.49    8.70
  -8   8   2   75.79    8.50
  -7  -8   2   -6.80    4.70
  -7  -8   2   -4.70    4.90
  -7  -8   2    5.90    5.60
   7  -8  -2    1.20    5.10
  -7  -8   2    3.20    3.90
   7   8  -2   -3.60    4.90
  -7   8   2    1.80    3.90
  -7   8   2   10.40    4.50
  -7   8   2    1.10    4.30
   7   8  -2   -1.70    4.80
  -6  -8   2  120.39   13.40
   6  -8  -2  105.19   10.20
  -6  -8   2   91.19   10.60
  -6  -8   2  128.19   11.00
  -6  -8   2   86.19   10.80
  -6   8   2   94.39    9.10
   6   8  -2   88.29   10.70
   6   8  -2  110.59    9.90
  -6   8   2  111.99   12.10
  -6   8   2   90.49    5.50
  -6   8   2   95.69    9.20
   5  -8  -2  122.49   13.80
  -5  -8   2  150.08   13.10
  -5  -8   2  140.89   11.00
  -5  -8   2  136.49   10.20
  -5   8   2  116.49   10.20
  -5   8   2  121.59    6.70
  -5   8   2  134.89   11.90
   5   8  -2  129.79   11.80
  -5   8   2  132.29   10.40
   5   8  -2  147.69   11.30
  -4  -8   2   32.60    6.50
  -4  -8   2   34.70    7.20
   4  -8  -2   24.10    6.20
   4  -8  -2   24.30    4.30
  -4  -8   2   31.60    6.90
  -4  -8   2   28.90    7.70
  -4   8   2   22.40    4.10
  -4   8   2   34.70    7.80
   4   8  -2   36.60    8.20
  -4   8   2   24.40    6.00
  -4   8   2   29.50    6.30
   4   8  -2   25.50    6.30
  -3  -8   2   21.90    5.50
   3  -8  -2   44.20    4.20
   3  -8  -2   25.70    7.30
  -3  -8   2   35.90    6.60
  -3  -8   2   40.00    7.60
  -3  -8   2   37.10    7.70
   3  -8  -2   26.40    2.80
  -3   8   2   35.50    7.80
   3   8  -2   29.60    7.40
  -3   8   2   35.30    6.80
  -3   8   2   34.00    4.80
  -3   8   2   36.30    6.50
   3   8  -2   20.80    5.80
   2  -8  -2  177.28   13.70
  -2  -8   2  179.08   11.00
   2  -8  -2  190.78   11.60
   2  -8  -2  197.98   10.00
  -2  -8   2  192.68   10.80
  -2  -8   2  218.08   15.10
   2  -8  -2  197.08    8.80
  -2  -8   2  217.98   12.40
  -2   8   2  177.48   12.40
  -2   8   2  192.08    9.70
   2   8  -2  196.68   13.90
   2   8  -2  197.98   13.10
  -2   8   2  190.58   13.90
  -2   8   2  228.68   13.10
   1  -8  -2    8.40    3.60
   1  -8  -2   13.00    6.10
  -1  -8   2   -1.30    4.20
  -1  -8   2   22.00    6.80
  -1  -8   2    5.00    4.50
   1  -8  -2    7.80    3.70
   1  -8  -2    9.40    5.10
  -1  -8   2   12.00    4.60
   1   8  -2   11.30    5.60
   1   8  -2   12.40    5.60
  -1   8   2    9.90    5.50
  -1   8   2   17.70    5.60
  -1   8   2   18.50    4.50
  -1   8   2    8.40    5.20
   0  -8   2   65.29    9.20
   0  -8  -2   53.19    9.30
   0  -8  -2   71.69    6.50
   0  -8   2   61.69    6.00
   0  -8  -2   78.99    9.10
   0  -8   2   52.79    7.90
   0  -8   2   89.89    8.10
   0   8   2   71.69    6.90
   0   8   2   64.39    8.60
   0   8  -2   68.49    9.30
   0   8   2   75.99    9.70
   0   8  -2   61.69    8.20
   0   8   2   75.89   10.00
   0   8  -2   65.09    9.00
  -1  -8  -2   47.00    6.20
  -1  -8  -2   46.60    6.50
  -1  -8  -2   45.20    7.40
  -1  -8  -2   54.89    9.00
   1  -8   2   32.70    6.20
   1  -8   2   42.20    7.20
   1  -8   2   33.30    4.20
   1   8   2   46.50    7.70
   1   8   2   31.20    7.70
  -1   8  -2   25.00    6.60
   1   8   2   44.90    8.00
  -1   8  -2   54.69    8.40
   2  -8   2   35.70    7.70
   2  -8   2   32.80    6.30
  -2  -8  -2   27.00    6.50
  -2  -8  -2   27.20    5.40
   2  -8   2   26.00    3.10
  -2  -8  -2   46.20    9.20
   2   8   2   50.29    8.20
  -2   8  -2   49.40    7.60
  -2   8  -2   40.10    6.70
   2   8   2   29.50    7.30
  -2   8  -2   23.40    6.00
  -3  -8  -2    6.90    3.90
   3  -8   2    3.60    5.10
  -3  -8  -2    2.80    4.30
  -3  -8  -2    3.40    4.00
   3  -8   2   11.80    4.60
   3   8   2    5.80    5.70
  -3   8  -2    4.30    4.50
  -3   8  -2    5.40    5.40
   3   8   2    4.60    5.20
  -3   8  -2    1.00    3.50
   4  -8   2  140.49   11.90
   4  -8   2  131.59    9.80
  -4  -8  -2  131.89   11.00
  -4  -8  -2  120.59   11.70
  -4  -8  -2  163.38   10.90
  -4   8  -2  118.59   10.30
   4   8   2  127.99   12.30
  -4   8  -2  144.29   12.10
   4   8   2  131.69   11.60
  -4   8  -2  145.89   11.20
   5  -8   2   30.70    7.20
  -5  -8  -2   22.10    5.50
  -5  -8  -2   25.50    7.00
  -5  -8  -2   18.40    5.40
  -5   8  -2   11.60    5.90
  -5   8  -2   15.00    5.00
   5   8   2   10.10    6.00
   5   8   2   18.90    6.90
  -5   8  -2   16.00    5.40
  -6  -8  -2   15.40    5.20
   6  -8   2   17.50    7.10
  -6  -8  -2    7.90    5.20
  -6  -8  -2    8.20    5.10
  -6   8  -2   20.00    5.60
  -6   8  -2   17.50    5.90
  -6   8  -2   16.80    6.20
   6   8   2   19.00    7.20
   6   8   2   13.40    6.70
  -7  -8  -2   30.40    7.30
  -7  -8  -2   31.40    7.60
  -7  -8  -2   38.00    7.90
   7  -8   2   43.00    8.50
  -7   8  -2   32.90    7.20
   7   8   2   35.50    8.20
  -7   8  -2   29.00    6.40
   7   8   2   38.90    8.30
  -8  -8  -2    2.30    4.30
   8  -8   2    0.00    6.20
  -8   8  -2    2.70    5.30
   8   8   2  -12.00    4.60
  -9  -8  -2   34.90    9.30
  -9  -8  -2   40.10    8.50
  -9   8  -2   48.10    8.70
   9   8   2   47.60    9.30
   9   8   2   51.39    8.90
  -9   8  -2   28.20    6.20
  -7  -9   2   12.10    6.60
  -7  -9   2   24.90    6.20
  -7  -9   2   13.40    7.10
  -7  -9   2   18.30    6.90
   7  -9  -2    7.20    6.10
   7   9  -2   19.60    7.20
   7   9  -2    2.90    6.30
  -7   9   2   17.00    5.90
  -7   9   2   27.10    7.60
  -6  -9   2   11.00    5.00
  -6  -9   2   19.60    6.70
   6  -9  -2   16.00    6.40
   6   9  -2   11.40    7.00
   6   9  -2   12.70    6.60
  -6   9   2   23.80    6.90
  -5  -9   2   12.10    5.50
  -5  -9   2   16.70    5.80
   5  -9  -2   26.50    6.90
  -5  -9   2    1.80    7.00
  -5  -9   2    8.10    5.80
  -5   9   2    6.10    5.20
   5   9  -2    7.00    5.40
   5   9  -2   -1.20    6.00
  -5   9   2    6.10    6.20
  -4  -9   2   68.19    9.80
  -4  -9   2   83.39    9.60
   4  -9  -2   65.19   10.40
  -4  -9   2   60.69   10.20
  -4  -9   2   71.19    9.10
   4   9  -2   77.09   10.40
   4   9  -2   68.59   10.70
  -4   9   2   55.89    8.80
  -4   9   2   79.89   11.20
  -3  -9   2   30.70    6.60
   3  -9  -2   42.60    9.00
  -3  -9   2   33.40    6.20
   3  -9  -2   44.10    3.90
   3  -9  -2   37.70    5.50
   3  -9  -2   37.90    3.00
  -3  -9   2   40.70    9.10
  -3  -9   2   38.40    7.10
  -3   9   2   31.40    7.60
   3   9  -2   44.30    8.30
  -3   9   2   33.70    7.40
   2  -9  -2    5.30    3.30
  -2  -9   2    3.70    4.40
   2  -9  -2    5.70    6.60
   2  -9  -2    9.10    3.10
  -2  -9   2    6.80    5.60
   2  -9  -2    4.60    4.00
  -2  -9   2    9.70    5.40
  -2  -9   2    3.80    4.40
   2   9  -2   11.40    6.40
  -2   9   2   10.20    5.60
   2   9  -2    5.80    4.60
  -2   9   2    7.60    3.90
  -2   9   2   -0.80    4.20
  -1  -9   2  123.29    8.90
  -1  -9   2  134.89   12.90
   1  -9  -2  127.29   11.20
   1  -9  -2  105.79    8.60
  -1  -9   2  109.69    9.90
  -1  -9   2  143.39   10.70
   1  -9  -2  127.69   14.40
   1  -9  -2  112.69    7.80
   1   9  -2  115.89   13.30
  -1   9   2  117.79   11.50
  -1   9   2  124.79   13.10
  -1   9   2  133.39   11.10
   1   9  -2  135.49   11.90
   0  -9  -2   53.69    6.70
   0  -9  -2   71.69   11.50
   0  -9   2   76.99   11.00
   0  -9  -2   58.89    9.10
   0  -9   2   67.69    9.90
   0  -9   2   64.79    6.50
   0  -9  -2   70.89    7.60
   0  -9   2   76.39    8.30
   0  -9  -2   73.69    8.10
   0   9  -2   64.59    9.00
   0   9   2   75.49   11.10
   0   9  -2   58.49    9.20
   0   9   2   68.29   10.30
  -1  -9  -2   17.30    5.50
   1  -9   2   19.10    4.00
  -1  -9  -2   13.50    6.40
   1  -9   2   13.30    3.70
  -1  -9  -2    2.40    4.70
   1  -9   2   14.20    5.70
   1   9   2   12.60    6.50
  -1   9  -2   18.50    6.50
   1   9   2   15.40    6.40
  -1   9  -2   15.50    7.90
  -1   9  -2   11.10    5.00
  -2  -9  -2   52.99    7.40
   2  -9   2   65.39    8.70
   2  -9   2   57.09   10.20
  -2  -9  -2   55.09    9.00
  -2  -9  -2   39.70   10.00
  -2   9  -2   45.10    9.30
  -2   9  -2   31.50    8.10
   2   9   2   87.39   11.50
   2   9   2   57.49    9.40
  -2   9  -2   71.29    9.60
  -3  -9  -2   55.29    8.60
   3  -9   2   54.99   10.10
  -3  -9  -2   53.39   10.00
  -3  -9  -2   53.39    8.00
   3  -9   2   62.09    8.50
   3   9   2   63.19   10.20
  -3   9  -2   62.49    9.10
   3   9   2   57.49   10.40
  -3   9  -2   64.39   10.50
  -4  -9  -2   -3.40    3.40
   4  -9   2   -4.80    3.60
  -4  -9  -2    1.10    4.50
   4  -9   2   -0.90    5.00
  -4  -9  -2   -3.90    4.40
  -4   9  -2    0.10    5.90
  -4   9  -2    9.50    5.30
   4   9   2  -14.40    5.90
  -5  -9  -2   28.80    6.60
  -5  -9  -2   20.80    7.20
   5  -9   2   43.80    9.00
  -5   9  -2   40.70    7.80
   5   9   2   34.40    8.50
   5   9   2   27.50    8.70
  -5   9  -2   36.30    9.00
   6  -9   2   26.10    7.30
  -6  -9  -2   23.20    6.90
  -6  -9  -2   38.40    8.80
  -6  -9  -2   23.70    7.60
  -6   9  -2   30.20    6.60
   6   9   2   27.20    8.50
   6   9   2   34.90    8.50
  -6   9  -2   31.50    8.10
 -16   0   3    4.60    5.30
 -16   0   3   -9.70    4.00
 -16   0   3    1.00    4.40
 -15   0   3   44.30    7.90
 -15   0   3   42.60    6.90
 -15   0   3   48.20    4.00
 -15   0   3   32.30    7.30
 -14   0   3    1.50    3.60
 -14   0   3    4.50    5.40
 -14   0   3   -0.90    1.60
 -13   0   3   60.69    7.90
 -13   0   3   54.89    3.60
 -13   0   3   58.09    6.60
 -13   0   3   55.09    7.10
 -12   0   3   -0.50    3.00
 -12   0   3    3.00    1.40
 -12   0   3    0.80    3.60
 -12   0   3   -1.00    3.50
 -12   0   3   -0.20    1.40
 -11   0   3  783.02   24.60
 -11   0   3  773.42   24.80
 -11   0   3  768.62   22.70
 -11   0   3  744.13   18.10
 -11   0   3  708.63   18.30
 -10   0   3    0.00    0.90
 -10   0   3   -4.00    2.70
 -10   0   3    0.50    2.90
 -10   0   3    0.80    1.00
 -10   0   3   -0.10    2.40
  -9   0   3   73.49    6.30
  -9   0   3   72.59    6.00
  -9   0   3   56.29    4.70
  -9   0   3   59.49    2.50
  -8   0   3    0.20    2.40
  -8   0   3   -0.50    0.60
  -8   0   3   -0.30    0.60
  -8   0   3    0.50    2.40
  -8   0   3   -2.90    1.50
  -7   0   3 1337.07   33.60
  -7   0   3 1297.07   32.50
  -7   0   3 1302.77   30.90
  -7   0   3 1250.37   28.20
  -7   0   3 1230.18   28.40
  -7   0   3 1264.47   28.10
  -7   0   3 1260.27   28.00
   6   0  -3    0.20    0.60
  -6   0   3   -0.40    0.70
  -6   0   3    0.10    0.50
  -6   0   3   -0.40    1.10
  -6   0   3    2.40    1.90
  -6   0   3   -0.30    0.50
  -6   0   3   -0.60    1.40
  -6   0   3    1.20    0.90
  -5   0   3  585.74   14.90
  -5   0   3  593.24   16.40
  -5   0   3  606.54   14.50
   5   0  -3  624.84   16.60
  -5   0   3  627.94   17.40
   5   0  -3  595.24   14.40
   5   0  -3  605.34   14.70
  -5   0   3  594.14   14.10
  -5   0   3  617.94   15.10
   4   0  -3   -0.30    0.80
   4   0  -3    0.00    1.10
   4   0  -3   -1.50    0.80
  -4   0   3    0.00    0.80
  -4   0   3   -0.10    0.70
   4   0  -3   -0.80    0.80
  -4   0   3   -0.30    0.70
  -4   0   3    0.40    1.50
  -4   0   3   -0.40    1.10
   4   0  -3    0.20    0.80
  -4   0   3    0.30    1.00
  -3   0   3  214.78    6.30
   3   0  -3  205.98    5.30
  -3   0   3  205.58    6.90
  -3   0   3  211.68    5.20
  -3   0   3  208.28    6.40
   3   0  -3  210.38    7.30
   3   0  -3  215.18    6.50
   3   0  -3  212.68    6.70
   3   0  -3  215.78    6.70
  -3   0   3  207.78    7.40
  -3   0   3  214.08    6.60
   2   0  -3   -0.60    1.00
   2   0  -3   -0.90    0.80
   2   0  -3   -0.40    0.30
   2   0  -3   -0.40    0.80
   2   0  -3   -0.50    0.90
  -2   0   3    0.80    1.00
  -2   0   3    0.80    1.30
  -2   0   3    1.60    1.00
  -2   0   3   -0.10    0.90
  -2   0   3    0.90    1.30
  -1   0   3  218.08    7.70
  -1   0   3  226.78    7.00
  -1   0   3  240.38    7.70
   1   0  -3  241.08    7.80
   1   0  -3  234.98    7.00
  -1   0   3  226.38    7.20
   1   0  -3  236.08    7.30
   1   0  -3  232.68    7.60
   1   0  -3  233.08    7.40
  -1   0   3  226.58    7.30
   0   0  -3    0.00    0.90
   0   0  -3    0.80    1.50
   0   0   3    1.20    1.40
   0   0   3   -1.10    0.90
   0   0  -3   -0.70    1.20
   0   0  -3    0.00    1.00
   0   0   3    0.00    1.00
   0   0   3    1.00    1.40
   0   0  -3    1.40    1.40
   0   0   3    1.60    1.60
   1   0   3 1193.08   28.00
   1   0   3 1163.48   27.90
   1   0   3 1113.89   27.80
  -1   0  -3 1157.68   28.50
  -1   0  -3 1189.68   27.80
  -1   0  -3 1141.09   27.30
  -1   0  -3 1125.99   27.90
  -1   0  -3 1181.18   27.80
   1   0   3 1159.48   28.50
  -1   0  -3 1141.69   27.90
  -2   0  -3   -1.30    1.40
   2   0   3   -2.00    1.00
   2   0   3    1.00    1.10
  -2   0  -3    1.40    1.50
   2   0   3    0.00    1.20
  -2   0  -3   -0.70    0.90
   2   0   3    2.10    1.30
  -2   0  -3    1.00    1.00
  -2   0  -3    0.80    1.50
  -3   0  -3   10.10    2.10
  -3   0  -3   11.00    2.40
   3   0   3    8.70    2.30
  -3   0  -3    9.10    2.10
  -3   0  -3    7.70    2.00
   3   0   3    9.50    2.20
   3   0   3    9.70    2.10
   3   0   3   12.20    2.00
  -4   0  -3   -1.80    1.50
  -4   0  -3    0.20    1.50
  -4   0  -3    0.00    1.40
  -4   0  -3   -2.10    1.40
   4   0   3   -0.20    1.20
   4   0   3    0.00    1.20
   4   0   3    1.00    1.50
  -4   0  -3   -0.30    1.10
   5   0   3   26.20    2.60
   5   0   3   21.10    3.00
   5   0   3   26.60    3.50
  -5   0  -3   23.60    3.10
  -5   0  -3   21.50    3.40
  -5   0  -3   20.70    3.30
  -5   0  -3   24.50    3.60
  -5   0  -3   18.30    3.20
  -6   0  -3   -1.00    1.90
  -6   0  -3    0.60    1.60
   6   0   3   -1.60    1.60
   6   0   3   -0.80    1.60
   6   0   3   -0.20    1.20
  -6   0  -3   -2.60    1.90
  -6   0  -3    0.60    2.80
  -6   0  -3    2.90    2.40
  -7   0  -3  158.28    8.90
  -7   0  -3  143.59    8.00
   7   0   3  144.59    7.10
  -7   0  -3  135.59    7.10
   7   0   3  124.59    7.30
  -7   0  -3  140.69    7.50
  -7   0  -3  146.39    6.90
  -8   0  -3   -0.60    2.10
  -8   0  -3    1.80    2.60
  -8   0  -3   -1.60    1.70
  -8   0  -3   -0.30    3.30
  -8   0  -3   -0.10    2.80
   8   0   3    0.10    1.80
   8   0   3   -1.70    1.70
  -9   0  -3    7.10    3.20
  -9   0  -3   -2.80    1.80
  -9   0  -3    2.70    3.90
  -9   0  -3   -2.50    2.60
  -9   0  -3    2.20    2.50
 -10   0  -3   -4.20    1.80
  10   0   3   -1.90    2.30
 -10   0  -3   -4.30    2.30
 -10   0  -3   -3.20    2.10
 -10   0  -3    1.60    4.20
 -11   0  -3  105.59    7.70
 -11   0  -3  122.49    7.00
 -11   0  -3  108.09    9.70
 -11   0  -3  107.49    7.30
 -12   0  -3   -0.20    3.50
  12   0   3    3.40    2.60
 -12   0  -3   -4.50    2.30
 -12   0  -3   -1.70    2.40
 -13   0  -3   16.90    3.60
 -13   0  -3   28.60    5.40
 -13   0  -3   18.20    5.40
 -13   0  -3   15.10    3.50
 -13   0  -3   23.70    6.40
 -14   0  -3    3.40    4.60
 -14   0  -3    2.30    2.30
 -14   0  -3    2.20    2.60
 -14   0  -3   -0.50    3.30
 -14   0  -3  -10.30    4.70
 -15   0  -3   -0.50    1.70
 -15   0  -3    5.20    4.00
 -15   0  -3    1.50    5.30
 -16  -1   3    9.80    5.40
 -16  -1   3   13.30    6.00
 -16  -1   3   18.90    6.70
 -16   1   3   15.80    6.20
 -16   1   3   14.00    6.10
 -16   1   3   16.50    5.10
 -15  -1   3    7.20    5.50
 -15  -1   3    8.50    5.30
 -15  -1   3   -0.90    4.80
 -15   1   3    7.00    1.60
 -15   1   3   12.20    5.40
 -15   1   3    1.00    4.40
 -14  -1   3   62.69    8.70
 -14  -1   3   83.29    5.50
 -14  -1   3   77.39    8.30
 -14  -1   3   69.89    8.90
 -14   1   3   75.59    9.10
 -14   1   3   59.69    8.00
 -14   1   3   64.99    7.50
 -14   1   3   70.79    3.30
 -13  -1   3   41.70    6.10
 -13  -1   3   27.10    6.50
 -13  -1   3   40.10    4.30
 -13  -1   3   27.50    6.80
 -13   1   3   38.90    6.60
 -13   1   3   40.40    2.10
 -13   1   3   32.80    5.90
 -13   1   3   29.10    5.30
 -12  -1   3  173.28   11.70
 -12  -1   3  166.08   11.30
 -12  -1   3  183.88    9.90
 -12  -1   3  180.58    8.00
 -12  -1   3  186.08    7.50
 -12   1   3  193.28   11.00
 -12   1   3  213.98   11.10
 -12   1   3  175.48    4.70
 -12   1   3  177.48    4.70
 -12   1   3  193.78   10.20
 -11  -1   3    1.10    1.80
 -11  -1   3    2.80    1.20
 -11  -1   3    0.50    1.10
 -11  -1   3    1.30    4.00
 -11  -1   3    4.80    3.60
 -11  -1   3    0.50    1.80
 -11  -1   3    0.20    2.70
 -11   1   3   -0.30    3.20
 -11   1   3    3.80    3.20
 -11   1   3   -1.10    2.50
 -10  -1   3  129.19    5.70
 -10  -1   3  127.99    8.30
 -10  -1   3  129.79    7.40
 -10  -1   3  117.39    4.80
 -10  -1   3  118.59    8.50
 -10  -1   3  129.49    5.10
 -10   1   3  115.39    7.60
  10   1  -3  120.69    3.70
 -10   1   3  119.09    7.00
 -10   1   3  125.39    7.90
  -9  -1   3    5.40    3.40
  -9  -1   3   -1.50    1.30
  -9  -1   3    3.20    3.10
  -9  -1   3    4.00    1.80
  -9  -1   3    0.60    1.50
  -9  -1   3    0.80    1.40
  -9  -1   3   -1.50    1.90
  -9   1   3    0.70    2.30
   9   1  -3    0.30    1.00
   9   1  -3    1.60    2.50
  -9   1   3   -0.60    2.60
   9   1  -3    0.20    0.90
  -9   1   3    1.30    2.70
  -8  -1   3    5.50    1.60
  -8  -1   3    7.00    1.80
  -8  -1   3   10.20    2.00
  -8  -1   3    9.00    3.30
  -8  -1   3    4.10    2.20
  -8  -1   3    4.80    2.60
  -8  -1   3    7.40    1.90
   8   1  -3    6.30    1.50
  -8   1   3    8.60    2.50
  -8   1   3    5.80    2.70
  -8   1   3    2.40    1.90
   8   1  -3    8.90    2.70
  -7  -1   3    0.30    1.20
  -7  -1   3   -0.20    1.30
  -7  -1   3   -0.30    1.10
  -7  -1   3   -0.80    1.50
  -7  -1   3   -0.60    1.20
  -7  -1   3   -2.60    2.10
  -7  -1   3    0.40    2.40
  -7   1   3   -0.80    1.40
  -7   1   3    1.00    1.70
   7   1  -3    4.20    2.00
   7   1  -3    0.40    1.10
   7   1  -3    2.90    2.40
   7   1  -3    0.20    1.00
  -7   1   3   -1.30    1.60
  -6  -1   3  868.51   21.90
  -6  -1   3  904.71   24.30
  -6  -1   3  915.41   25.20
  -6  -1   3  864.31   22.20
  -6  -1   3  927.41   22.60
  -6  -1   3  866.31   21.80
  -6   1   3  900.61   23.50
   6   1  -3  897.51   22.90
  -6   1   3  930.31   22.20
  -6   1   3  887.51   22.60
   6   1  -3  887.81   21.50
   6   1  -3  900.71   22.40
   6   1  -3  899.41   24.40
  -6   1   3  898.01   20.00
   5  -1  -3  181.78    7.10
  -5  -1   3  181.38    6.30
  -5  -1   3  173.78    6.20
   5  -1  -3  174.18    5.30
  -5  -1   3  172.28    6.50
  -5  -1   3  195.68    8.20
  -5  -1   3  175.08    7.50
   5  -1  -3  175.78    4.80
   5   1  -3  177.68    6.60
  -5   1   3  181.68    7.00
  -5   1   3  179.18    5.20
   5   1  -3  188.48    7.60
   5   1  -3  178.58    6.30
   5   1  -3  172.48    5.90
  -5   1   3  173.58    5.10
  -5   1   3  168.38    6.10
  -4  -1   3  691.73   18.30
  -4  -1   3  687.83   17.10
  -4  -1   3  668.03   18.80
  -4  -1   3  663.63   17.50
   4  -1  -3  688.93   17.70
   4  -1  -3  677.33   16.50
   4  -1  -3  676.13   16.10
  -4  -1   3  644.14   17.00
  -4  -1   3  678.53   16.60
  -4   1   3  695.23   16.40
   4   1  -3  650.53   16.30
  -4   1   3  661.53   15.70
  -4   1   3  652.83   16.30
  -4   1   3  700.73   16.30
   4   1  -3  673.33   16.00
  -4   1   3  685.53   17.70
   4   1  -3  683.43   16.70
   4   1  -3  686.33   18.50
   4   1  -3  654.93   18.60
   4   1  -3  683.53   16.90
   3  -1  -3  347.37    8.70
  -3  -1   3  348.97   10.10
   3  -1  -3  363.86   10.30
  -3  -1   3  350.16   10.50
   3  -1  -3  337.67    9.30
  -3  -1   3  359.16   10.00
   3  -1  -3  344.97    9.60
  -3  -1   3  353.56   11.00
  -3  -1   3  334.77    9.10
  -3  -1   3  345.57   10.40
  -3   1   3  338.27    8.30
  -3   1   3  338.37    8.60
   3   1  -3  347.37    9.80
   3   1  -3  332.37   10.50
   3   1  -3  349.27    9.20
   3   1  -3  361.56   10.50
  -3   1   3  352.06   10.30
  -3   1   3  349.07    9.10
  -3   1   3  339.27    9.60
   3   1  -3  347.87   12.10
  -3   1   3  345.97    9.40
   2  -1  -3  150.98    4.10
  -2  -1   3  153.58    5.60
  -2  -1   3  138.79    5.60
   2  -1  -3  149.99    5.50
  -2  -1   3  144.69    6.00
   2  -1  -3  158.08    4.20
  -2  -1   3  158.48    4.80
   2  -1  -3  144.59    5.60
  -2  -1   3  155.88    6.00
  -2  -1   3  145.69    5.60
   2  -1  -3  150.08    4.90
   2   1  -3  149.39    5.50
  -2   1   3  155.28    4.10
   2   1  -3  148.59    4.70
   2   1  -3  162.18    5.80
  -2   1   3  148.29    5.80
   2   1  -3  148.89    5.90
  -2   1   3  155.38    4.70
   2   1  -3  151.48    5.50
  -2   1   3  154.48    5.60
   2   1  -3  144.19    6.00
  -2   1   3  152.98    5.10
  -2   1   3  147.59    5.20
  -1  -1   3  292.27    9.10
  -1  -1   3  285.27    8.90
   1  -1  -3  301.27    9.10
   1  -1  -3  283.67    8.70
   1  -1  -3  292.47    9.00
  -1  -1   3  308.77    9.20
   1  -1  -3  298.77    8.70
  -1  -1   3  286.37    9.40
   1  -1  -3  293.67    7.60
  -1  -1   3  298.07    9.00
   1  -1  -3  306.47    7.90
   1   1  -3  294.27    9.00
   1   1  -3  305.17    8.20
  -1   1   3  293.67    8.70
  -1   1   3  303.87    9.10
   1   1  -3  290.77    9.00
  -1   1   3  307.47    8.80
   1   1  -3  300.67    9.20
   1   1  -3  296.27    9.40
  -1   1   3  307.37    9.20
   1   1  -3  300.67    9.00
  -1   1   3  298.07    7.60
   0  -1   3 1201.88   28.60
   0  -1   3 1145.49   27.90
   0  -1   3 1123.99   27.60
   0  -1  -3 1201.48   27.70
   0  -1  -3 1174.98   27.80
   0  -1  -3 1160.38   26.60
   0  -1   3 1165.28   28.10
   0  -1   3 1145.09   27.80
   0  -1  -3 1154.98   27.80
   0  -1  -3 1168.48   28.10
   0   1  -3 1145.29   27.80
   0   1  -3 1194.08   27.80
   0   1  -3 1146.19   27.90
   0   1   3 1121.09   27.50
   0   1   3 1197.98   28.10
   0   1  -3 1139.89   28.40
   0   1   3 1148.99   28.10
   0   1  -3 1120.99   27.70
   0   1   3 1128.99   27.50
   0   1   3 1156.58   26.50
   1  -1   3    7.20    1.60
  -1  -1  -3    8.60    1.50
   1  -1   3    7.00    1.70
   1  -1   3   10.20    2.30
  -1  -1  -3    4.70    1.40
  -1  -1  -3    9.40    2.10
  -1  -1  -3    7.60    1.70
  -1  -1  -3    8.00    1.80
   1  -1   3    8.80    1.70
   1  -1   3    8.60    1.90
  -1   1  -3    6.80    1.70
  -1   1  -3    6.70    1.60
   1   1   3    6.30    1.50
   1   1   3    5.10    1.40
   1   1   3    8.40    1.80
  -1   1  -3    6.20    1.60
   1   1   3    6.50    1.70
  -1   1  -3   11.20    2.10
   1   1   3    7.70    1.80
  -1   1  -3    6.90    1.80
   2  -1   3  724.43   20.00
  -2  -1  -3  689.53   19.00
  -2  -1  -3  734.13   18.80
   2  -1   3  755.72   19.90
   2  -1   3  720.83   18.70
  -2  -1  -3  730.93   19.50
  -2  -1  -3  741.03   19.20
   2  -1   3  737.83   18.70
  -2  -1  -3  680.63   20.70
  -2   1  -3  753.02   19.00
  -2   1  -3  700.43   18.90
  -2   1  -3  756.32   19.80
   2   1   3  712.53   19.60
   2   1   3  730.73   19.00
   2   1   3  704.83   18.80
  -2   1  -3  729.43   18.50
   2   1   3  714.13   19.40
   2   1   3  763.02   18.90
  -3  -1  -3    7.70    2.30
  -3  -1  -3   10.20    2.20
  -3  -1  -3   10.90    2.40
   3  -1   3    8.70    1.90
  -3  -1  -3    7.00    2.10
   3  -1   3    6.70    1.90
   3  -1   3    7.90    1.80
   3  -1   3   11.50    2.50
  -3  -1  -3    6.60    2.10
  -3   1  -3    6.90    2.00
   3   1   3    8.70    2.10
   3   1   3    7.50    2.10
  -3   1  -3    7.70    2.30
  -3   1  -3    5.90    1.90
   3   1   3    4.70    1.80
  -3   1  -3    7.20    1.80
  -3   1  -3    5.70    2.20
   3   1   3    7.50    1.70
  -4  -1  -3   45.50    4.20
  -4  -1  -3   46.60    4.00
   4  -1   3   47.00    4.00
  -4  -1  -3   47.10    4.30
  -4  -1  -3   53.39    4.10
   4  -1   3   44.60    3.20
   4  -1   3   44.80    3.40
  -4  -1  -3   46.50    3.80
  -4   1  -3   50.69    3.70
   4   1   3   47.70    3.70
  -4   1  -3   49.10    4.00
   4   1   3   48.60    3.80
  -4   1  -3   45.90    4.00
  -4   1  -3   52.29    3.80
   4   1   3   43.80    3.50
   4   1   3   47.10    4.00
  -5  -1  -3    0.70    1.90
  -5  -1  -3   -1.20    1.50
   5  -1   3   -0.50    1.20
  -5  -1  -3    0.60    2.20
   5  -1   3   -0.20    1.20
  -5  -1  -3   -0.20    1.60
  -5  -1  -3    0.00    2.30
   5  -1   3   -2.40    1.40
  -5   1  -3   -0.40    1.50
  -5   1  -3    0.80    2.00
   5   1   3    0.70    1.70
   5   1   3   -1.20    1.40
   5   1   3    0.20    1.70
  -5   1  -3   -1.10    1.30
  -5   1  -3   -0.30    1.50
   5   1   3   -1.00    1.90
  -6  -1  -3  720.03   19.90
  -6  -1  -3  699.33   20.40
   6  -1   3  708.63   18.90
  -6  -1  -3  702.03   20.00
   6  -1   3  676.03   16.40
   6  -1   3  694.93   19.80
  -6  -1  -3  727.53   21.30
  -6  -1  -3  661.33   21.00
   6   1   3  703.93   20.90
   6   1   3  691.63   19.50
   6   1   3  716.23   20.30
  -6   1  -3  708.43   19.40
  -6   1  -3  699.53   21.50
  -6   1  -3  699.73   20.10
  -6   1  -3  691.93   19.40
   6   1   3  678.93   18.40
  -6   1  -3  695.63   19.90
  -7  -1  -3  116.99    6.70
  -7  -1  -3  114.19    6.60
  -7  -1  -3  103.59    6.40
   7  -1   3  118.59    6.40
  -7  -1  -3  108.19    7.10
  -7  -1  -3   97.99    7.20
  -7   1  -3  112.99    6.00
  -7   1  -3  113.59    6.30
  -7   1  -3  116.19    6.60
  -7   1  -3  105.49    6.40
   7   1   3  104.99    5.90
  -7   1  -3  108.69    7.30
   7   1   3  112.19    5.10
   7   1   3  109.39    6.50
  -8  -1  -3  129.99    8.70
  -8  -1  -3  136.09    8.90
  -8  -1  -3  137.69    7.60
   8  -1   3  125.19    6.10
   8  -1   3  150.78   10.70
  -8  -1  -3  131.59    7.50
  -8  -1  -3  139.39    7.50
  -8   1  -3  138.99    6.80
  -8   1  -3  134.09    7.30
   8   1   3  141.89    7.10
  -8   1  -3  142.39    9.20
  -8   1  -3  123.09    7.00
  -8   1  -3  114.79    7.20
   8   1   3  127.29    7.30
  -9  -1  -3    9.50    3.20
  -9  -1  -3    2.60    2.70
  -9  -1  -3    3.40    3.20
   9  -1   3   11.60    2.90
  -9  -1  -3   10.00    3.30
  -9  -1  -3    6.70    3.30
   9   1   3    3.90    2.90
  -9   1  -3   13.30    3.10
  -9   1  -3    8.20    3.40
  -9   1  -3    5.80    3.60
  -9   1  -3    5.10    2.60
  -9   1  -3    8.70    3.30
 -10  -1  -3  110.49    7.20
 -10  -1  -3  101.99    7.40
 -10  -1  -3  104.89    8.30
 -10  -1  -3  101.89    7.20
 -10   1  -3  108.29    6.30
 -10   1  -3  112.69    7.40
 -10   1  -3  107.29    7.90
 -10   1  -3  107.79    6.70
  10   1   3  100.39    7.00
 -10   1  -3  111.99    9.50
  11  -1   3   11.00    3.00
 -11  -1  -3    8.50    5.10
 -11  -1  -3    4.40    3.30
 -11   1  -3    8.30    2.90
 -11   1  -3    9.70    4.20
 -11   1  -3   13.80    3.20
 -11   1  -3   10.50    3.90
 -11   1  -3    8.00    4.00
 -12  -1  -3  156.88    8.80
  12  -1   3  159.68    7.60
 -12  -1  -3  149.79    9.00
 -12  -1  -3  173.48   10.00
 -12  -1  -3  151.88   11.60
 -12  -1  -3  168.58   12.20
 -12   1  -3  182.68   10.00
 -12   1  -3  150.28    7.70
 -12   1  -3  172.88    8.10
 -12   1  -3  156.68   12.10
  12   1   3  142.99    9.50
  13  -1   3    2.70    2.30
 -13  -1  -3    3.20    4.50
 -13  -1  -3    6.70    4.00
 -13  -1  -3    1.20    3.00
 -13  -1  -3   -7.30    4.20
 -13  -1  -3   -0.90    3.30
 -13   1  -3   -1.50    3.60
 -13   1  -3   -1.90    2.20
  13   1   3   -3.80    3.50
 -13   1  -3    5.50    6.00
 -13   1  -3    1.90    2.40
 -14  -1  -3    6.40    4.80
 -14  -1  -3    0.60    3.70
 -14  -1  -3   26.20    7.50
 -14  -1  -3    9.30    4.60
 -14   1  -3    5.40    2.40
 -14   1  -3    7.80    4.30
 -14   1  -3    5.20    4.80
 -14   1  -3    5.60    5.60
 -14   1  -3    4.10    1.80
 -15  -1  -3    4.10    4.90
 -15  -1  -3   -5.30    5.80
 -15   1  -3   -3.10    6.50
 -15   1  -3   -3.30    5.20
 -16  -2   3   16.90    6.80
 -16   2   3   -3.70    4.00
 -15  -2   3   14.70    6.90
 -15  -2   3   18.50    5.80
 -15  -2   3    8.00    4.90
 -15   2   3   12.70    5.30
 -15   2   3   12.90    1.80
 -15   2   3   15.20    5.20
 -14  -2   3    1.50    1.30
 -14  -2   3   -2.00    5.00
 -14  -2   3    0.90    3.60
 -14  -2   3    0.50    3.90
 -14  -2   3    2.80    1.80
 -14  -2   3    0.90    2.70
 -14   2   3    0.90    3.20
 -14   2   3   -2.60    4.00
 -14   2   3    1.40    3.60
 -13  -2   3   40.20    7.70
 -13  -2   3   55.89    9.00
 -13  -2   3   54.69    7.00
 -13  -2   3   65.09    5.80
 -13  -2   3   63.09    4.50
 -13   2   3   63.39    7.50
 -13   2   3   58.39    7.00
 -13   2   3   63.89    7.40
 -12  -2   3   -1.60    3.10
 -12  -2   3    2.50    3.50
 -12  -2   3    2.30    3.40
 -12  -2   3    0.10    2.30
 -12  -2   3    6.70    2.30
 -12  -2   3   11.80    3.40
  12   2  -3    5.30    1.70
 -12   2   3    2.30    3.40
 -12   2   3    2.90    3.60
 -12   2   3    5.90    4.10
 -11  -2   3  225.98   10.00
 -11  -2   3  229.18    9.50
 -11  -2   3  234.38   12.60
 -11  -2   3  243.38    9.40
 -11  -2   3  223.18   11.00
 -11  -2   3  229.38    9.00
 -11  -2   3  236.68   13.70
 -11   2   3  223.98   12.10
 -11   2   3  232.98   10.70
  11   2  -3  224.08   11.30
 -11   2   3  238.68   10.90
 -10  -2   3    9.20    3.80
 -10  -2   3    7.80    2.60
 -10  -2   3    4.30    2.20
 -10  -2   3   10.00    3.90
 -10  -2   3    3.80    2.70
 -10  -2   3    5.70    2.60
 -10   2   3    6.60    2.90
  10   2  -3    4.50    3.00
 -10   2   3    4.60    3.00
  10   2  -3    4.20    1.90
 -10   2   3    7.10    2.90
  -9  -2   3    6.30    2.50
  -9  -2   3    4.70    2.50
  -9  -2   3    4.30    2.10
  -9  -2   3    3.70    3.60
  -9  -2   3    2.90    2.20
  -9  -2   3    3.00    2.80
  -9  -2   3    7.30    3.20
   9   2  -3    3.30    2.60
  -9   2   3    7.40    2.90
   9   2  -3    1.70    1.80
   9   2  -3    3.20    1.80
  -9   2   3    6.30    2.80
  -9   2   3    3.10    2.50
  -8  -2   3   -1.00    1.80
  -8  -2   3    0.20    2.10
  -8  -2   3    1.10    2.30
  -8  -2   3    1.50    1.90
  -8  -2   3    2.70    2.00
  -8  -2   3   -1.50    1.90
   8   2  -3    2.30    1.70
  -8   2   3    3.10    2.20
  -8   2   3    0.70    2.00
   8   2  -3   -0.10    2.10
   8   2  -3    2.70    1.70
   8   2  -3    1.40    3.00
  -7  -2   3  249.97    9.20
  -7  -2   3  214.68   10.60
  -7  -2   3  223.28    8.80
  -7  -2   3  236.48    9.20
   7  -2  -3  233.08    5.80
  -7  -2   3  223.98    8.80
  -7  -2   3  230.08   10.40
  -7   2   3  232.18    8.20
   7   2  -3  226.08    8.50
   7   2  -3  225.28   10.30
  -7   2   3  241.38    8.70
  -7   2   3  235.68    6.30
   7   2  -3  234.58    9.20
  -7   2   3  234.38    6.30
   7   2  -3  232.58    8.30
  -6  -2   3    1.40    1.40
  -6  -2   3    1.20    2.50
  -6  -2   3    0.80    1.70
  -6  -2   3    0.50    1.30
   6  -2  -3   -0.60    1.00
  -6  -2   3    2.00    3.10
   6  -2  -3    0.50    1.00
  -6  -2   3    2.90    1.70
   6   2  -3    6.20    2.00
   6   2  -3    2.60    2.30
  -6   2   3    1.20    1.00
  -6   2   3   -0.40    1.20
   6   2  -3    0.40    1.20
  -6   2   3   -0.10    1.30
   6   2  -3    1.00    1.50
  -6   2   3    1.10    1.00
  -5  -2   3  785.32   21.70
   5  -2  -3  813.12   20.80
  -5  -2   3  823.02   22.30
  -5  -2   3  837.02   23.70
  -5  -2   3  802.72   21.50
   5  -2  -3  818.02   20.00
  -5  -2   3  836.02   21.30
  -5  -2   3  826.62   23.10
   5   2  -3  812.72   23.00
   5   2  -3  829.82   20.60
  -5   2   3  823.72   20.90
  -5   2   3  814.12   19.50
   5   2  -3  816.32   22.30
  -5   2   3  812.12   19.90
  -5   2   3  840.72   19.40
   5   2  -3  857.11   21.50
   5   2  -3  833.72   20.40
  -5   2   3  836.32   20.20
  -4  -2   3   52.29    4.10
  -4  -2   3   43.20    3.00
  -4  -2   3   44.90    3.80
   4  -2  -3   39.50    2.80
  -4  -2   3   44.00    3.50
  -4  -2   3   43.20    3.60
  -4  -2   3   48.20    4.10
   4  -2  -3   49.60    3.10
   4  -2  -3   43.10    2.90
  -4   2   3   42.90    2.70
   4   2  -3   39.30    3.30
   4   2  -3   44.50    3.70
  -4   2   3   38.10    3.20
   4   2  -3   43.90    3.60
  -4   2   3   45.70    3.00
   4   2  -3   43.40    3.80
  -4   2   3   46.60    1.70
   4   2  -3   43.60    3.40
  -4   2   3   40.70    3.00
  -4   2   3   46.30    2.70
   4   2  -3   47.40    3.10
  -3  -2   3   20.80    3.00
   3  -2  -3   18.70    2.30
  -3  -2   3   18.90    2.80
   3  -2  -3   21.80    2.20
  -3  -2   3   27.50    2.80
  -3  -2   3   23.50    3.10
  -3  -2   3   28.00    3.30
  -3  -2   3   16.30    2.80
   3  -2  -3   22.00    2.50
   3   2  -3   21.10    2.50
   3   2  -3   20.90    3.10
  -3   2   3   21.40    2.60
   3   2  -3   21.20    2.80
   3   2  -3   19.40    3.00
  -3   2   3   18.70    2.30
  -3   2   3   17.90    2.40
   3   2  -3   19.10    2.70
  -3   2   3   22.00    2.40
  -3   2   3   20.50    1.80
  -2  -2   3  220.18    8.30
   2  -2  -3  234.48    7.50
  -2  -2   3  243.48    8.70
   2  -2  -3  235.18    8.00
  -2  -2   3  241.78    8.40
  -2  -2   3  236.98    9.00
   2  -2  -3  237.98    8.20
   2  -2  -3  241.58    7.90
  -2  -2   3  240.88    7.70
   2  -2  -3  247.28    7.20
  -2  -2   3  244.88    8.60
  -2   2   3  237.58    7.10
   2   2  -3  235.58    7.60
   2   2  -3  227.58    8.30
   2   2  -3  257.07    8.50
  -2   2   3  244.98    7.90
  -2   2   3  236.98    7.80
  -2   2   3  236.18    8.40
   2   2  -3  243.18    8.60
   2   2  -3  237.28    9.00
  -2   2   3  250.87    8.10
   1  -2  -3  510.55   14.40
  -1  -2   3  505.65   14.40
   1  -2  -3  519.45   14.00
  -1  -2   3  517.35   15.20
  -1  -2   3  503.05   14.40
   1  -2  -3  498.15   13.20
  -1  -2   3  518.65   14.80
   1  -2  -3  517.75   12.40
   1  -2  -3  489.05   14.50
   1  -2  -3  540.45   14.10
  -1  -2   3  512.15   13.80
  -1  -2   3  491.75   14.10
   1   2  -3  514.15   14.70
  -1   2   3  508.25   14.30
   1   2  -3  526.65   14.50
  -1   2   3  508.35   14.10
   1   2  -3  511.05   14.60
   1   2  -3  495.45   14.20
  -1   2   3  512.75   13.20
  -1   2   3  535.85   15.00
   1   2  -3  514.75   13.80
  -1   2   3  493.35   13.90
   0  -2  -3   24.70    2.80
   0  -2   3   24.10    3.10
   0  -2   3   24.30    2.80
   0  -2  -3   27.50    3.80
   0  -2  -3   27.50    3.00
   0  -2   3   26.30    3.40
   0  -2   3   21.70    2.50
   0  -2  -3   24.60    3.10
   0  -2   3   28.30    3.70
   0  -2  -3   21.60    2.40
   0   2  -3   21.60    2.50
   0   2  -3   19.00    2.50
   0   2  -3   25.00    2.50
   0   2  -3   22.50    2.90
   0   2  -3   21.70    3.00
   0   2   3   26.80    2.60
   0   2  -3   21.60    3.10
   0   2   3   26.50    3.00
   0   2   3   32.80    3.60
   0   2   3   23.90    2.40
   0   2   3   27.20    3.00
  -1  -2  -3  598.64   16.80
   1  -2   3  587.14   17.10
  -1  -2  -3  610.14   16.20
   1  -2   3  608.94   17.40
  -1  -2  -3  607.64   17.10
  -1  -2  -3  608.14   16.80
   1  -2   3  591.54   15.90
  -1   2  -3  592.84   16.90
  -1   2  -3  640.24   17.10
  -1   2  -3  591.94   17.40
   1   2   3  586.94   17.10
  -1   2  -3  617.24   15.90
  -1   2  -3  618.84   16.70
   1   2   3  605.14   16.70
   1   2   3  594.74   16.80
   1   2   3  634.64   17.30
   1   2   3  623.24   17.60
  -2  -2  -3   88.19    4.80
  -2  -2  -3   90.39    5.30
  -2  -2  -3   78.89    5.00
  -2  -2  -3   85.69    5.00
   2  -2   3   82.69    4.10
   2  -2   3   81.69    5.30
   2  -2   3   86.89    5.20
   2  -2   3   78.09    4.50
   2  -2   3   73.19    5.10
  -2   2  -3   87.49    4.20
  -2   2  -3   87.49    4.70
   2   2   3   83.79    4.60
  -2   2  -3   91.79    5.00
   2   2   3   89.09    4.70
   2   2   3   90.39    5.10
   2   2   3   80.99    5.30
  -2   2  -3   86.49    5.20
  -2   2  -3   99.99    5.30
  -3  -2  -3   81.69    5.20
   3  -2   3   76.49    4.90
  -3  -2  -3   82.99    5.30
  -3  -2  -3   82.89    5.20
  -3  -2  -3   90.59    6.40
   3  -2   3   84.19    4.60
   3  -2   3   79.79    4.60
   3  -2   3   82.09    4.20
  -3  -2  -3   74.19    5.00
  -3   2  -3   78.69    4.50
   3   2   3   86.29    5.10
  -3   2  -3   92.99    5.50
   3   2   3   83.39    5.30
   3   2   3   84.69    4.70
  -3   2  -3   80.09    5.10
  -3   2  -3   89.29    5.00
  -3   2  -3   88.09    4.30
   3   2   3   93.79    5.10
  -4  -2  -3    4.70    2.10
  -4  -2  -3    2.50    2.20
  -4  -2  -3    4.10    2.00
   4  -2   3    8.60    2.50
  -4  -2  -3    7.10    2.10
  -4  -2  -3    7.80    2.70
   4  -2   3    1.20    1.60
   4  -2   3    4.90    1.90
   4  -2   3    5.00    1.80
  -4   2  -3    5.60    1.70
   4   2   3    6.70    2.10
  -4   2  -3    3.20    2.00
  -4   2  -3    6.00    2.10
   4   2   3    2.60    1.80
   4   2   3    6.60    2.30
  -4   2  -3    5.40    2.00
  -4   2  -3    8.70    2.80
   4   2   3    3.30    2.50
  -5  -2  -3  978.10   27.60
  -5  -2  -3 1030.50   27.10
   5  -2   3 1050.79   27.40
  -5  -2  -3  998.80   28.30
   5  -2   3  993.10   24.60
   5  -2   3 1020.00   25.70
  -5  -2  -3 1005.70   27.40
  -5   2  -3  996.20   26.20
   5   2   3  999.20   26.60
   5   2   3 1020.90   27.30
  -5   2  -3 1026.40   26.90
   5   2   3  970.20   26.20
  -5   2  -3  995.80   25.20
  -5   2  -3  987.90   27.50
  -5   2  -3 1030.40   26.70
   5   2   3 1031.80   27.80
   6  -2   3   95.59    6.00
  -6  -2  -3   92.79    7.00
  -6  -2  -3  101.79    6.40
  -6  -2  -3  106.59    6.60
  -6  -2  -3   97.59    6.40
  -6  -2  -3   96.69    6.90
   6  -2   3   87.39    5.00
   6   2   3   97.29    5.80
  -6   2  -3   89.19    5.50
  -6   2  -3  105.99    6.60
   6   2   3   90.79    5.70
  -6   2  -3  104.99    6.10
   6   2   3  105.49    6.70
   6   2   3   89.59    5.80
   6   2   3   95.29    6.20
  -6   2  -3   95.79    5.10
  -6   2  -3   91.29    5.80
  -7  -2  -3  513.65   18.00
   7  -2   3  515.95   16.50
  -7  -2  -3  528.85   18.90
  -7  -2  -3  503.75   17.00
   7  -2   3  480.25   14.80
  -7  -2  -3  495.05   18.50
  -7  -2  -3  500.85   16.80
  -7   2  -3  520.25   15.60
  -7   2  -3  500.75   17.50
   7   2   3  517.45   15.50
  -7   2  -3  541.15   16.20
   7   2   3  503.05   17.60
   7   2   3  508.25   16.20
   7   2   3  532.45   17.50
   7   2   3  545.65   15.80
  -7   2  -3  532.85   16.30
  -7   2  -3  508.25   15.80
  -8  -2  -3   -0.70    2.50
  -8  -2  -3    0.80    2.60
  -8  -2  -3   -1.50    2.40
   8  -2   3    0.10    1.70
  -8  -2  -3    3.00    3.00
  -8  -2  -3   -2.30    3.00
  -8  -2  -3    2.40    3.70
  -8   2  -3   -0.80    1.90
   8   2   3    1.00    2.60
  -8   2  -3   -2.70    2.50
  -8   2  -3   -2.50    2.10
  -8   2  -3   -0.10    2.10
   8   2   3    0.90    2.10
  -8   2  -3   -0.40    2.00
   8   2   3    0.20    1.90
  -9  -2  -3    3.40    3.20
  -9  -2  -3    3.40    3.40
  -9  -2  -3    1.50    2.70
  -9  -2  -3   -1.70    3.80
   9  -2   3    3.40    2.50
  -9  -2  -3   -0.80    3.70
  -9   2  -3    2.60    2.70
  -9   2  -3    3.90    2.40
  -9   2  -3   -0.40    2.60
  -9   2  -3    0.20    2.40
  -9   2  -3   -1.50    2.70
   9   2   3   -1.50    1.20
   9   2   3    1.20    3.10
   9   2   3   -0.50    1.50
 -10  -2  -3   34.40    5.40
 -10  -2  -3   36.50    6.00
 -10  -2  -3   38.00    5.60
 -10  -2  -3   30.60    5.20
 -10  -2  -3   35.60    7.20
  10   2   3   43.90    5.90
 -10   2  -3   25.60    5.40
 -10   2  -3   20.40    3.50
 -10   2  -3   29.10    4.10
 -10   2  -3   31.70    4.70
 -11  -2  -3  119.69    8.40
 -11  -2  -3  145.09   11.90
 -11  -2  -3  150.78    9.60
  11  -2   3  132.39    7.00
 -11  -2  -3  138.49   10.80
 -11  -2  -3  137.89    9.10
  11   2   3  136.59    8.90
 -11   2  -3  138.69    8.50
 -11   2  -3  128.39   10.90
 -11   2  -3  145.19    8.50
 -11   2  -3  110.59    7.90
 -12  -2  -3   -0.90    5.40
 -12  -2  -3   17.10    4.30
 -12  -2  -3   15.90    5.00
 -12  -2  -3   13.50    4.30
 -12  -2  -3    9.70    4.50
  12  -2   3    6.50    2.80
 -12   2  -3    7.70    4.80
 -12   2  -3   11.00    4.40
 -12   2  -3   -0.50    3.80
  12   2   3   -2.10    3.30
 -12   2  -3   12.40    3.00
 -12   2  -3    7.90    2.70
 -13  -2  -3   88.69    7.60
 -13  -2  -3  114.89    9.30
 -13  -2  -3   94.29    8.10
 -13  -2  -3   99.19   11.90
 -13  -2  -3   91.49   10.80
 -13   2  -3   95.89    8.20
  13   2   3   87.59    6.90
 -13   2  -3   98.09    5.90
 -13   2  -3   95.29   11.30
 -14  -2  -3   10.00    4.30
 -14  -2  -3    2.20    6.10
 -14  -2  -3    9.90    7.00
 -14  -2  -3    6.50    4.80
 -14   2  -3   11.00    4.40
 -14   2  -3    9.00    2.30
 -14   2  -3   21.40    7.40
 -15  -3   3   18.70    7.40
 -15  -3   3   10.70    6.80
 -15  -3   3   10.00    5.20
 -15   3   3    9.00    4.10
 -15   3   3   26.50    6.00
 -15   3   3   -0.10    4.40
 -14  -3   3    3.40    4.20
 -14  -3   3    1.50    2.60
 -14  -3   3    3.70    3.00
 -14  -3   3   -7.00    3.80
 -14  -3   3   -6.10    5.00
 -14   3   3   -0.10    3.70
 -14   3   3   -0.90    1.50
 -14   3   3    4.90    4.10
 -13  -3   3   -2.20    3.60
 -13  -3   3    1.70    2.80
 -13  -3   3   -0.10    3.90
 -13  -3   3    1.40    2.80
 -13   3   3    1.00    3.70
 -13   3   3    1.80    3.40
 -13   3   3   -2.90    1.30
  13   3  -3    0.70    2.40
 -13   3   3   -3.50    3.40
 -12  -3   3   34.10    5.00
 -12  -3   3   42.30    8.30
 -12  -3   3   35.10    6.20
 -12  -3   3   36.30    6.60
 -12  -3   3   31.50    4.60
 -12   3   3   38.50    3.30
 -12   3   3   36.50    5.50
  12   3  -3   33.50    4.00
 -12   3   3   36.60    5.80
 -11  -3   3    2.70    3.00
 -11  -3   3    1.50    2.70
 -11  -3   3    6.70    3.50
 -11  -3   3    1.70    3.50
 -11  -3   3    4.00    3.60
 -11  -3   3    2.00    3.60
 -11   3   3    2.70    2.70
 -11   3   3    2.30    3.80
 -10  -3   3   19.00    5.60
 -10  -3   3   12.10    3.40
 -10  -3   3   16.50    4.20
 -10  -3   3   21.90    5.00
 -10  -3   3   15.10    4.00
 -10  -3   3   21.90    4.80
  10   3  -3   12.80    4.30
 -10   3   3   12.40    3.00
  10   3  -3   15.80    3.30
 -10   3   3   22.10    3.90
  -9  -3   3   48.40    5.80
  -9  -3   3   48.80    5.50
  -9  -3   3   44.30    5.20
  -9  -3   3   39.10    5.10
  -9  -3   3   37.30    6.70
  -9  -3   3   38.10    6.40
   9   3  -3   44.70    4.70
   9   3  -3   47.10    5.40
  -9   3   3   42.90    4.40
  -9   3   3   42.00    2.30
  -9   3   3   36.90    4.00
  -8  -3   3    0.60    2.60
   8  -3  -3    1.90    1.20
  -8  -3   3    5.00    2.70
   8  -3  -3    0.90    1.00
  -8  -3   3    1.20    2.50
  -8  -3   3    3.60    2.90
  -8  -3   3   -1.50    2.20
  -8  -3   3    4.60    3.80
   8   3  -3    3.30    2.20
   8   3  -3    2.10    1.60
   8   3  -3    1.30    2.20
  -8   3   3    2.80    2.00
  -8   3   3    0.80    1.30
   8   3  -3    0.70    1.60
   8   3  -3    3.80    2.40
   8   3  -3   -1.60    2.10
  -8   3   3    1.50    1.30
  -8   3   3    1.50    1.90
   7  -3  -3   55.79    3.60
  -7  -3   3   51.69    5.30
   7  -3  -3   49.99    3.30
  -7  -3   3   57.99    5.10
  -7  -3   3   54.59    5.10
  -7  -3   3   65.09    5.60
  -7  -3   3   55.69    7.90
   7   3  -3   55.19    4.80
  -7   3   3   53.79    3.40
  -7   3   3   56.99    4.40
  -7   3   3   54.39    3.50
  -7   3   3   50.49    3.50
  -7   3   3   59.79    3.50
  -7   3   3   54.29    3.80
   7   3  -3   68.49    6.40
   7   3  -3   53.19    4.20
   7   3  -3   55.59    5.00
  -6  -3   3  234.48    9.40
  -6  -3   3  226.38   10.00
  -6  -3   3  223.48   10.10
  -6  -3   3  226.78   10.70
  -6  -3   3  233.98    9.60
  -6  -3   3  232.58    9.90
   6  -3  -3  239.58    8.10
  -6  -3   3  232.48   10.90
   6   3  -3  223.68    9.30
  -6   3   3  242.28    8.10
   6   3  -3  222.08   10.80
  -6   3   3  217.88    7.70
  -6   3   3  244.58    8.10
   6   3  -3  232.08    8.90
   6   3  -3  224.98    9.10
   6   3  -3  231.28    8.40
   6   3  -3  255.57    9.90
  -6   3   3  232.18    7.00
  -6   3   3  242.48    7.00
  -6   3   3  237.38    8.50
  -5  -3   3   -2.40    1.80
   5  -3  -3    0.20    1.10
   5  -3  -3   -0.20    1.30
  -5  -3   3    1.20    2.00
   5  -3  -3   -2.60    1.40
  -5  -3   3   -0.70    1.90
  -5  -3   3    0.40    2.50
  -5   3   3   -0.20    0.60
   5   3  -3   -0.70    1.60
   5   3  -3   -0.60    1.40
  -5   3   3    0.70    1.50
  -5   3   3    0.60    1.40
   5   3  -3   -0.60    1.30
  -5   3   3    0.30    1.30
   5   3  -3   -1.10    2.20
   5   3  -3   -1.00    1.70
   5   3  -3    1.20    1.50
  -5   3   3    1.00    1.40
  -4  -3   3  739.13   21.00
  -4  -3   3  741.33   21.80
   4  -3  -3  743.13   18.60
  -4  -3   3  731.23   21.90
  -4  -3   3  768.52   21.70
   4  -3  -3  743.03   20.10
  -4  -3   3  747.43   20.30
  -4  -3   3  735.23   21.50
   4   3  -3  740.63   21.70
  -4   3   3  741.83   18.60
   4   3  -3  747.63   20.30
   4   3  -3  740.03   22.00
   4   3  -3  748.43   20.90
   4   3  -3  721.33   20.10
   4   3  -3  743.23   20.70
  -4   3   3  734.53   19.20
  -4   3   3  761.02   20.30
  -4   3   3  759.52   19.90
  -4   3   3  740.13   19.50
  -3  -3   3   13.30    3.10
  -3  -3   3   14.90    3.20
  -3  -3   3   10.60    2.50
  -3  -3   3   14.80    2.70
  -3  -3   3   21.60    3.50
   3  -3  -3   16.10    2.90
   3  -3  -3   17.00    2.80
  -3  -3   3   18.50    3.20
   3  -3  -3   17.70    2.30
   3  -3  -3   13.50    2.40
   3   3  -3   14.70    2.80
  -3   3   3   17.30    2.30
   3   3  -3   13.30    2.70
   3   3  -3   13.70    2.80
  -3   3   3   12.00    2.40
   3   3  -3   14.70    2.90
  -3   3   3   14.20    2.60
   3   3  -3   16.00    2.80
  -3   3   3   14.80    2.60
  -3   3   3   12.80    2.10
  -2  -3   3  117.39    5.90
  -2  -3   3  115.19    6.30
   2  -3  -3  105.79    5.90
  -2  -3   3  117.89    6.10
   2  -3  -3  118.89    6.10
   2  -3  -3  115.49    5.20
  -2  -3   3  115.59    6.90
  -2  -3   3  117.49    5.80
   2  -3  -3  121.09    5.10
  -2  -3   3  120.39    6.10
  -2   3   3  117.49    6.10
  -2   3   3  114.79    5.90
  -2   3   3  111.49    5.60
   2   3  -3  118.69    6.80
  -2   3   3  113.79    5.00
   2   3  -3  115.69    6.00
   2   3  -3  116.59    6.10
   2   3  -3  103.19    6.20
  -2   3   3  113.99    5.10
   2   3  -3  113.29    5.50
   1  -3  -3  244.58    7.30
  -1  -3   3  246.68    8.90
  -1  -3   3  254.97   10.20
   1  -3  -3  248.58    8.50
   1  -3  -3  249.58    9.00
   1  -3  -3  255.37    8.50
   1  -3  -3  247.78    9.50
  -1  -3   3  256.47    9.80
  -1  -3   3  260.67    9.60
   1  -3  -3  240.18    9.50
  -1  -3   3  243.48    9.80
  -1  -3   3  250.87    8.80
   1   3  -3  257.17    9.50
  -1   3   3  232.18    9.10
  -1   3   3  246.68    9.90
   1   3  -3  252.87    9.60
   1   3  -3  241.18    9.60
  -1   3   3  251.57    8.40
   1   3  -3  249.08   10.30
   1   3  -3  254.97    8.90
  -1   3   3  254.67    8.80
  -1   3   3  247.78    9.10
   0  -3  -3 1951.40   45.40
   0  -3   3 2000.00   47.90
   0  -3  -3 1992.30   47.10
   0  -3  -3 1979.10   46.30
   0  -3   3 1993.50   48.50
   0  -3   3 2010.20   46.10
   0  -3   3 2004.30   47.50
   0  -3  -3 2022.70   47.90
   0  -3   3 2001.60   47.40
   0  -3  -3 1948.91   47.90
   0  -3  -3 1972.30   46.70
   0   3  -3 1952.20   46.80
   0   3   3 1994.40   47.20
   0   3  -3 2027.30   47.50
   0   3  -3 1955.90   48.50
   0   3   3 1993.80   47.60
   0   3  -3 1946.21   46.10
   0   3   3 1953.80   48.30
   0   3  -3 1980.60   47.30
   0   3   3 1950.90   46.20
   0   3  -3 2022.60   48.00
   1  -3   3    9.70    2.00
  -1  -3  -3   12.40    2.40
  -1  -3  -3    9.60    2.50
  -1  -3  -3   13.40    2.50
   1  -3   3    8.30    2.50
  -1  -3  -3    7.60    2.40
  -1  -3  -3    8.40    2.10
   1  -3   3   12.10    2.80
   1  -3   3   11.00    2.80
  -1  -3  -3   10.10    2.30
   1  -3   3    8.50    2.40
  -1   3  -3    9.20    2.60
   1   3   3    9.10    2.50
  -1   3  -3    9.30    2.50
  -1   3  -3   13.60    2.50
  -1   3  -3    9.30    1.90
   1   3   3   13.80    2.60
  -1   3  -3   14.10    3.20
   1   3   3    8.90    2.60
  -1   3  -3    9.50    2.80
   2  -3   3  166.88    8.20
  -2  -3  -3  171.68    8.00
   2  -3   3  167.88    6.20
   2  -3   3  163.18    7.70
  -2  -3  -3  174.18    8.40
  -2  -3  -3  185.08    8.00
  -2  -3  -3  184.88    7.60
  -2  -3  -3  185.98    8.40
   2  -3   3  160.38    7.50
   2  -3   3  183.38    7.70
  -2  -3  -3  164.68    7.50
   2   3   3  175.28    7.30
   2   3   3  169.98    7.70
  -2   3  -3  171.78    7.60
  -2   3  -3  176.18    7.60
  -2   3  -3  171.08    7.80
   2   3   3  179.68    8.80
  -2   3  -3  166.38    7.50
  -2   3  -3  169.58    6.20
   2   3   3  182.48    8.00
  -3  -3  -3  178.68    8.10
  -3  -3  -3  168.18    8.30
   3  -3   3  172.88    7.70
  -3  -3  -3  164.58    8.20
   3  -3   3  172.28    7.60
  -3  -3  -3  173.08    8.00
  -3  -3  -3  175.48    7.90
   3  -3   3  183.68    8.50
  -3  -3  -3  159.28    8.30
   3  -3   3  187.98    8.70
   3  -3   3  174.18    6.20
  -3   3  -3  167.48    8.10
   3   3   3  179.48    8.00
  -3   3  -3  177.58    8.40
   3   3   3  180.28    8.30
  -3   3  -3  182.38    7.90
   3   3   3  180.58    8.00
  -3   3  -3  185.88    8.30
   3   3   3  174.28    9.00
  -3   3  -3  178.78    6.20
   4  -3   3  427.16   11.80
   4  -3   3  443.86   13.40
   4  -3   3  442.66   14.70
   4  -3   3  421.86   13.60
  -4  -3  -3  415.36   15.10
  -4  -3  -3  439.56   14.70
  -4  -3  -3  426.06   15.00
  -4  -3  -3  423.66   15.00
  -4  -3  -3  434.06   15.20
   4   3   3  407.36   13.70
   4   3   3  430.96   15.30
  -4   3  -3  439.36   14.70
  -4   3  -3  422.16   13.60
   4   3   3  430.96   14.20
   4   3   3  418.36   14.40
  -4   3  -3  415.46   11.90
  -4   3  -3  401.06   14.50
  -4   3  -3  420.66   14.10
  -5  -3  -3   16.10    3.40
   5  -3   3   13.80    2.70
  -5  -3  -3   13.30    3.10
  -5  -3  -3   14.20    3.90
  -5  -3  -3   20.50    4.10
   5  -3   3   17.20    2.80
  -5  -3  -3   18.20    3.60
  -5  -3  -3   20.80    4.40
   5  -3   3   16.00    3.50
   5   3   3   16.40    3.30
   5   3   3   15.40    3.50
  -5   3  -3   10.40    3.40
  -5   3  -3   16.50    2.40
  -5   3  -3   18.30    3.60
   5   3   3   12.50    3.80
   5   3   3   11.20    3.40
  -5   3  -3   14.80    3.40
   5   3   3   15.90    3.60
  -5   3  -3   14.20    3.00
  -6  -3  -3  375.56   14.70
  -6  -3  -3  417.66   15.00
   6  -3   3  411.86   14.50
  -6  -3  -3  390.66   14.50
  -6  -3  -3  368.46   15.20
  -6  -3  -3  382.36   16.70
   6  -3   3  359.96   12.50
   6   3   3  389.26   14.10
  -6   3  -3  399.66   11.80
   6   3   3  390.66   13.50
  -6   3  -3  389.46   13.90
   6   3   3  405.56   14.80
  -6   3  -3  392.46   13.40
  -6   3  -3  386.36   13.60
   6   3   3  406.66   14.40
  -6   3  -3  390.36   14.70
   6   3   3  417.16   15.60
  -7  -3  -3   19.60    4.80
  -7  -3  -3   16.60    4.40
  -7  -3  -3   22.80    4.30
   7  -3   3   20.30    4.10
   7  -3   3   23.80    3.40
  -7  -3  -3   25.80    4.70
  -7  -3  -3   17.00    4.10
   7   3   3   19.10    4.50
   7   3   3   21.70    3.70
  -7   3  -3   22.90    3.80
   7   3   3   27.90    5.00
  -7   3  -3   31.90    4.50
   7   3   3   16.00    4.00
  -7   3  -3   22.40    3.90
  -8  -3  -3   42.40    5.70
  -8  -3  -3   23.10    4.60
  -8  -3  -3   39.10    5.70
  -8  -3  -3   33.70    5.80
   8  -3   3   31.70    4.60
  -8  -3  -3   40.40    5.90
  -8   3  -3   33.30    4.50
   8   3   3   43.20    6.20
  -8   3  -3   43.20    5.00
   8   3   3   28.40    4.10
   8   3   3   33.90    4.70
  -8   3  -3   42.00    5.50
  -8   3  -3   39.30    3.70
  -8   3  -3   43.20    6.10
   9  -3   3   50.09    5.60
  -9  -3  -3   53.69    7.40
  -9  -3  -3   44.30    5.80
  -9  -3  -3   54.59    6.70
  -9  -3  -3   49.60    6.50
  -9  -3  -3   50.79    6.90
   9   3   3   36.20    4.20
  -9   3  -3   47.70    5.70
  -9   3  -3   54.79    5.30
   9   3   3   55.59    5.40
   9   3   3   51.99    6.70
  -9   3  -3   41.60    5.00
  -9   3  -3   52.69    4.50
 -10  -3  -3    6.70    3.70
 -10  -3  -3   -2.60    2.90
 -10  -3  -3    0.50    4.30
 -10  -3  -3    0.30    3.20
 -10  -3  -3    1.90    3.70
  10   3   3    1.70    1.80
 -10   3  -3    2.30    2.50
  10   3   3    1.80    1.90
 -10   3  -3    4.60    3.30
  10   3   3    4.70    4.10
 -10   3  -3    4.20    2.80
 -10   3  -3    2.00    2.80
  11  -3   3    3.10    2.80
 -11  -3  -3    0.20    4.60
 -11  -3  -3   -0.80    3.30
 -11  -3  -3    1.00    3.40
 -11  -3  -3    1.40    3.80
 -11  -3  -3    4.30    3.80
 -11   3  -3    0.50    2.40
 -11   3  -3    1.10    2.70
 -11   3  -3    3.30    3.50
 -11   3  -3   -1.80    2.50
  11   3   3    1.70    3.40
 -11   3  -3    0.80    4.90
 -12  -3  -3   74.99    8.50
  12  -3   3   62.49    5.10
 -12  -3  -3   53.79    7.00
 -12  -3  -3   72.59    9.70
 -12  -3  -3   58.39    8.80
 -12   3  -3   52.29    4.90
 -12   3  -3   59.09    6.80
 -12   3  -3   52.89    6.20
  12   3   3   55.49    6.60
 -12   3  -3   61.69    9.50
 -12   3  -3   58.59    5.40
 -13  -3  -3   -5.50    5.40
 -13  -3  -3    3.00    3.90
  13  -3   3    0.10    2.20
 -13  -3  -3    2.10    4.10
 -13  -3  -3    1.10    5.10
 -13   3  -3    3.20    2.10
 -13   3  -3   -0.30    2.20
 -13   3  -3    4.30    4.50
 -13   3  -3   -3.10    3.70
  13   3   3   -2.20    3.90
 -14  -3  -3   28.00    8.70
 -14  -3  -3   24.90    6.30
 -14  -3  -3   15.50    5.40
 -14   3  -3   18.40    2.60
 -14   3  -3   24.30    5.20
 -14   3  -3   23.10    7.60
 -14   3  -3   16.50    5.00
 -14  -4   3    8.60    5.20
 -14  -4   3   -0.60    3.50
 -14  -4   3    5.20    6.30
 -14  -4   3   -3.50    3.70
 -14   4   3   -2.20    3.10
 -14   4   3    2.90    2.80
 -14   4   3    8.00    4.50
 -14   4   3    5.70    2.80
 -13  -4   3   11.90    5.20
 -13  -4   3   16.50    4.60
 -13  -4   3   25.20    4.90
 -13  -4   3   34.30    7.90
 -13  -4   3   20.60    6.40
 -13   4   3   21.70    3.60
 -13   4   3   20.90    3.40
 -13   4   3   15.80    4.80
  13   4  -3   21.10    4.20
 -13   4   3   23.30    6.00
 -12  -4   3   -1.50    3.00
 -12  -4   3   -0.90    4.80
 -12  -4   3   -5.60    2.90
 -12  -4   3   -4.20    4.00
 -12  -4   3    1.80    5.10
 -12   4   3    0.40    3.50
 -12   4   3   -0.80    2.20
 -12   4   3    3.10    2.30
 -12   4   3    1.80    3.10
 -12   4   3    0.60    3.20
 -11  -4   3  128.09    9.20
 -11  -4   3  116.49    8.70
 -11  -4   3  118.29    9.10
 -11  -4   3  138.69   11.00
 -11  -4   3  130.29   10.30
 -11   4   3  123.09    6.80
 -11   4   3  129.29    7.50
  11   4  -3  129.79    7.90
 -11   4   3  123.99    7.50
 -10  -4   3    4.00    3.60
  10  -4  -3    8.60    1.20
 -10  -4   3    6.40    5.30
 -10  -4   3    4.40    3.10
 -10  -4   3    5.90    4.10
  10   4  -3    8.70    3.30
 -10   4   3   15.70    3.90
 -10   4   3    7.40    2.90
 -10   4   3    5.40    2.10
 -10   4   3    9.90    2.90
 -10   4   3    9.10    2.00
  10   4  -3    5.40    1.90
   9  -4  -3   14.70    2.50
  -9  -4   3   15.30    5.30
  -9  -4   3    6.50    3.30
  -9  -4   3   15.20    4.30
  -9  -4   3   17.10    5.40
  -9  -4   3   18.90    4.80
  -9  -4   3   20.00    4.90
   9  -4  -3    9.30    2.10
  -9   4   3   12.80    2.70
   9   4  -3   10.90    3.60
   9   4  -3   12.40    2.90
  -9   4   3   14.00    2.20
  -9   4   3   16.40    2.60
  -9   4   3   18.30    2.70
  -9   4   3   17.10    3.70
  -9   4   3   16.50    3.30
  -8  -4   3   35.50    5.50
   8  -4  -3   34.80    3.70
  -8  -4   3   34.00    4.80
  -8  -4   3   35.30    5.60
  -8  -4   3   35.50    5.50
  -8  -4   3   34.10    6.30
   8  -4  -3   25.30    3.30
  -8  -4   3   24.30    5.90
   8   4  -3   33.90    4.80
  -8   4   3   24.30    2.90
   8   4  -3   26.40    3.90
  -8   4   3   35.30    3.00
  -8   4   3   35.60    4.60
  -8   4   3   31.20    2.50
  -8   4   3   31.60    3.50
  -8   4   3   32.30    3.60
   8   4  -3   35.50    5.00
   8   4  -3   38.40    4.70
  -7  -4   3  435.36   17.70
  -7  -4   3  464.15   18.30
   7  -4  -3  466.05   14.10
  -7  -4   3  429.16   16.70
  -7  -4   3  433.76   17.40
  -7  -4   3  466.05   16.80
  -7  -4   3  429.66   16.80
   7  -4  -3  438.86   14.30
  -7   4   3  455.85   11.90
  -7   4   3  453.15   13.90
  -7   4   3  445.96   11.60
   7   4  -3  474.85   15.30
   7   4  -3  454.55   14.60
  -7   4   3  465.85   14.00
  -7   4   3  457.05   14.70
   7   4  -3  430.86   15.50
   7   4  -3  449.66   15.90
   6  -4  -3   -0.10    1.70
  -6  -4   3   -1.20    2.90
   6  -4  -3    1.00    1.80
  -6  -4   3    1.70    2.60
  -6  -4   3   -0.50    2.60
  -6  -4   3   -1.10    2.80
  -6  -4   3    0.00    2.20
  -6  -4   3   -0.60    1.90
   6   4  -3    3.30    2.90
  -6   4   3   -0.20    1.80
   6   4  -3    0.10    2.20
  -6   4   3    1.40    2.10
   6   4  -3    3.10    2.40
  -6   4   3    1.50    0.90
   6   4  -3    1.00    2.50
  -6   4   3    1.10    1.20
  -6   4   3    0.00    2.00
  -6   4   3    1.30    2.00
   6   4  -3    4.70    2.90
   6   4  -3   -2.10    2.00
   5  -4  -3  322.47   11.50
  -5  -4   3  315.87   13.40
   5  -4  -3  322.67   12.00
  -5  -4   3  309.97   13.20
  -5  -4   3  334.57   12.30
  -5  -4   3  318.27   13.50
  -5  -4   3  309.27   12.30
  -5  -4   3  311.97   12.90
   5  -4  -3  307.57    8.70
   5   4  -3  318.17   11.80
   5   4  -3  327.27   13.90
   5   4  -3  317.17   12.30
  -5   4   3  301.27   10.90
  -5   4   3  321.07    8.90
   5   4  -3  307.17   13.30
  -5   4   3  325.87    7.70
  -5   4   3  318.07   11.00
  -5   4   3  336.37   11.60
  -5   4   3  296.77   11.00
   5   4  -3  299.47   11.70
  -4  -4   3   73.09    6.00
  -4  -4   3   68.89    5.50
  -4  -4   3   84.79    5.40
   4  -4  -3   69.29    5.20
  -4  -4   3   77.99    6.40
  -4  -4   3   64.59    5.20
   4  -4  -3   83.09    5.90
  -4  -4   3   74.79    6.20
   4  -4  -3   70.49    3.60
  -4   4   3   77.89    3.80
  -4   4   3   73.79    5.20
  -4   4   3   67.89    4.70
   4   4  -3   83.99    6.50
   4   4  -3   66.89    4.90
   4   4  -3   82.09    6.30
  -4   4   3   72.59    5.10
  -4   4   3   74.29    2.40
   4   4  -3   66.19    5.20
   4   4  -3   72.29    5.50
  -4   4   3   71.39    5.10
  -3  -4   3   96.49    6.80
  -3  -4   3  101.09    6.70
  -3  -4   3  104.99    6.80
   3  -4  -3  100.59    5.80
   3  -4  -3   91.89    4.70
  -3  -4   3   97.29    6.20
  -3  -4   3   84.59    7.30
   3  -4  -3   95.59    6.20
   3  -4  -3   97.19    3.50
  -3   4   3   98.89    5.50
  -3   4   3   91.19    5.80
   3   4  -3  102.29    5.90
   3   4  -3  109.59    6.80
   3   4  -3  113.39    7.00
  -3   4   3  102.59    5.90
   3   4  -3  104.59    7.10
   3   4  -3  106.29    6.30
   2  -4  -3  722.53   19.80
  -2  -4   3  712.23   20.60
  -2  -4   3  719.03   20.60
  -2  -4   3  697.03   21.10
  -2  -4   3  678.73   22.30
  -2  -4   3  718.53   21.80
   2  -4  -3  685.63   21.00
  -2  -4   3  707.33   20.90
   2  -4  -3  724.13   18.70
   2  -4  -3  694.33   17.20
  -2   4   3  708.23   20.30
  -2   4   3  712.83   19.50
  -2   4   3  696.63   21.60
   2   4  -3  701.03   20.20
  -2   4   3  681.63   20.50
   2   4  -3  709.93   22.40
   2   4  -3  696.43   21.10
   2   4  -3  728.33   21.10
  -1  -4   3 1125.19   31.10
  -1  -4   3 1084.59   29.30
   1  -4  -3 1064.99   27.60
  -1  -4   3 1084.59   29.00
  -1  -4   3 1091.39   28.40
  -1  -4   3 1090.19   30.40
   1  -4  -3 1104.19   26.50
   1  -4  -3 1122.79   29.90
   1  -4  -3 1116.59   28.40
   1  -4  -3 1119.19   30.20
  -1  -4   3 1065.99   29.70
   1   4  -3 1095.09   29.70
   1   4  -3 1074.89   31.00
  -1   4   3 1127.19   29.70
  -1   4   3 1110.49   29.20
  -1   4   3 1105.39   28.10
   1   4  -3 1141.99   29.70
   1   4  -3 1108.39   29.00
   0  -4  -3   46.90    4.50
   0  -4   3   59.59    5.20
   0  -4   3   42.40    5.70
   0  -4  -3   50.99    5.70
   0  -4   3   51.09    4.80
   0  -4   3   55.79    4.10
   0  -4  -3   41.30    3.90
   0  -4  -3   50.39    3.80
   0  -4  -3   54.19    4.60
   0  -4  -3   54.19    5.20
   0  -4   3   55.69    5.90
   0   4  -3   55.99    5.10
   0   4  -3   59.19    5.00
   0   4   3   53.09    6.70
   0   4   3   49.90    4.30
   0   4  -3   58.59    6.40
   0   4   3   48.60    4.70
   0   4  -3   52.69    4.70
  -1  -4  -3 1341.17   33.90
   1  -4   3 1371.76   35.60
  -1  -4  -3 1366.86   35.10
   1  -4   3 1380.16   36.90
   1  -4   3 1335.87   35.30
  -1  -4  -3 1379.96   35.80
  -1  -4  -3 1391.26   36.40
   1  -4   3 1327.07   35.80
  -1  -4  -3 1376.46   36.50
  -1  -4  -3 1360.56   34.70
   1  -4   3 1456.65   33.20
   1   4   3 1368.16   37.00
   1   4   3 1327.97   35.80
   1   4   3 1371.86   35.50
  -1   4  -3 1415.16   35.30
  -1   4  -3 1354.26   35.00
  -1   4  -3 1416.16   35.70
   1   4   3 1364.46   34.50
  -1   4  -3 1375.26   37.00
  -2  -4  -3  355.46   13.50
  -2  -4  -3  363.46   14.30
   2  -4   3  383.86   13.70
  -2  -4  -3  398.06   13.20
   2  -4   3  366.86   14.30
  -2  -4  -3  371.76   14.40
  -2  -4  -3  379.36   13.90
  -2  -4  -3  377.56   13.20
   2  -4   3  380.46   11.10
   2  -4   3  359.46   13.50
   2  -4   3  378.26   13.40
   2   4   3  373.96   13.10
   2   4   3  402.36   15.00
   2   4   3  364.16   13.90
   2   4   3  371.86   13.60
  -2   4  -3  400.06   14.80
  -2   4  -3  399.36   15.40
  -2   4  -3  380.86   13.40
  -2   4  -3  383.16   13.50
   3  -4   3   44.60    5.60
   3  -4   3   48.80    4.60
   3  -4   3   40.10    2.80
  -3  -4  -3   46.30    5.40
   3  -4   3   50.29    5.80
  -3  -4  -3   37.70    4.80
  -3  -4  -3   47.40    5.70
  -3  -4  -3   47.40    5.90
  -3  -4  -3   44.50    5.30
   3  -4   3   50.29    4.70
  -3  -4  -3   45.20    5.60
   3   4   3   37.60    5.20
  -3   4  -3   51.09    5.70
  -3   4  -3   49.80    5.80
   3   4   3   43.50    5.70
  -3   4  -3   41.80    4.80
   3   4   3   37.60    4.80
   3   4   3   44.00    5.00
  -3   4  -3   39.80    5.30
  -3   4  -3   40.20    2.70
  -3   4  -3   42.00    4.10
   4  -4   3   63.89    5.20
   4  -4   3   59.69    3.10
   4  -4   3   57.59    6.30
  -4  -4  -3   60.49    5.90
   4  -4   3   56.09    4.90
  -4  -4  -3   51.29    6.10
  -4  -4  -3   65.09    6.90
  -4  -4  -3   58.19    6.30
  -4  -4  -3   60.79    6.30
   4   4   3   63.89    5.50
  -4   4  -3   54.49    4.90
  -4   4  -3   59.69    5.20
  -4   4  -3   55.59    5.20
  -4   4  -3   56.49    5.50
  -4   4  -3   60.79    5.60
   4   4   3   55.79    5.80
   4   4   3   59.09    5.90
   4   4   3   58.79    5.60
   4   4   3   61.69    5.30
  -4   4  -3   59.59    3.00
  -5  -4  -3  327.07   14.00
  -5  -4  -3  364.16   14.20
  -5  -4  -3  379.56   14.10
  -5  -4  -3  364.76   14.90
   5  -4   3  370.06   13.90
  -5  -4  -3  324.17   15.70
   5  -4   3  335.57   12.50
   5   4   3  333.07   13.40
   5   4   3  334.27   13.10
  -5   4  -3  345.87   13.50
  -5   4  -3  347.87   14.00
  -5   4  -3  349.47   12.80
   5   4   3  333.97   13.70
   5   4   3  331.97   14.10
  -5   4  -3  360.46   13.70
   5   4   3  353.66   15.10
  -5   4  -3  349.17    9.40
  -6  -4  -3    2.20    3.30
  -6  -4  -3   -1.10    3.00
  -6  -4  -3   -3.60    2.90
  -6  -4  -3   -1.70    3.00
   6  -4   3   -3.10    2.30
  -6  -4  -3   -2.50    2.20
   6   4   3    2.00    2.80
  -6   4  -3   -2.60    2.20
   6   4   3   -0.10    2.50
  -6   4  -3    2.10    2.90
   6   4   3   -1.10    2.90
  -6   4  -3    0.10    1.10
  -6   4  -3   -0.40    2.90
   6   4   3    1.40    2.60
  -6   4  -3    1.50    2.40
  -7  -4  -3  374.46   15.90
  -7  -4  -3  406.56   16.30
  -7  -4  -3  426.46   16.50
   7  -4   3  436.36   15.80
  -7  -4  -3  435.26   17.90
  -7  -4  -3  385.46   16.30
   7   4   3  439.36   16.30
   7   4   3  398.46   14.80
  -7   4  -3  416.66   15.50
  -7   4  -3  424.06   14.80
   7   4   3  401.56   17.00
  -7   4  -3  406.66   15.30
  -7   4  -3  413.36   16.20
  -8  -4  -3   20.80    5.10
   8  -4   3   17.00    4.50
  -8  -4  -3   22.20    4.60
  -8  -4  -3   19.70    5.10
  -8  -4  -3   24.20    6.20
  -8  -4  -3   13.00    5.20
   8   4   3   23.80    4.80
  -8   4  -3   24.20    4.80
  -8   4  -3   18.20    4.60
  -8   4  -3   23.30    4.20
   8   4   3   18.00    4.80
   8   4   3   18.80    5.20
  -8   4  -3   15.90    2.30
  -8   4  -3   13.40    3.70
  -9  -4  -3    1.00    3.30
  -9  -4  -3    7.20    4.20
   9  -4   3    5.50    3.50
   9   4   3    5.20    4.10
  -9   4  -3    4.00    2.00
  -9   4  -3    4.40    3.30
   9   4   3    2.10    4.20
  -9   4  -3   11.00    3.50
   9   4   3    4.90    3.60
  10  -4   3   26.90    4.80
 -10  -4  -3   23.50    5.60
 -10  -4  -3   45.50    6.90
 -10  -4  -3   35.40    6.60
 -10  -4  -3   37.90    6.40
 -10  -4  -3   31.40    7.40
 -10   4  -3   32.60    5.10
  10   4   3   30.80    5.90
  10   4   3   35.00    6.60
  10   4   3   26.70    4.50
 -10   4  -3   31.10    4.80
 -10   4  -3   31.60    5.40
  10   4   3   31.70    4.90
 -11  -4  -3   53.89    9.30
 -11  -4  -3   66.09    8.60
 -11  -4  -3   57.39    7.50
 -11   4  -3   52.79    6.10
 -11   4  -3   65.99    7.20
  11   4   3   52.19    4.90
 -11   4  -3   58.99    4.60
  11   4   3   47.50    6.50
 -11   4  -3   46.10    5.50
  11   4   3   58.29    4.40
 -12  -4  -3    8.10    4.40
 -12  -4  -3   -1.20    4.00
  12  -4   3    0.40    2.90
 -12  -4  -3    1.80    4.70
 -12  -4  -3   -0.60    5.10
 -12  -4  -3   -4.50    3.50
 -12   4  -3    0.20    2.70
 -12   4  -3   10.40    6.20
 -12   4  -3    3.10    3.70
 -12   4  -3    3.00    2.80
  12   4   3    3.80    4.40
 -12   4  -3    1.30    2.90
 -12   4  -3    0.50    2.40
 -13  -4  -3   56.89   10.70
 -13  -4  -3   47.90    8.90
 -13  -4  -3   48.50    7.60
 -13  -4  -3   56.19    7.90
 -13   4  -3   51.49    6.90
 -13   4  -3   43.40    8.80
 -13   4  -3   51.79    5.10
 -13   4  -3   54.59    5.00
 -14  -5   3    7.00    5.40
 -14  -5   3    0.50    6.00
 -14  -5   3   11.80    4.90
 -14  -5   3    6.30    7.20
 -14   5   3   11.70    3.90
 -14   5   3    9.10    5.00
 -13  -5   3   15.10    6.20
 -13  -5   3    3.60    6.10
 -13  -5   3   10.60    4.80
 -13  -5   3    4.50    4.80
 -13   5   3    5.70    4.70
 -13   5   3    3.10    3.40
 -13   5   3    6.60    3.60
 -12  -5   3   77.29   10.90
 -12  -5   3   82.29   11.20
 -12  -5   3   97.19    8.40
 -12  -5   3   84.09    8.40
 -12  -5   3   92.89    9.10
  12   5  -3   78.99    7.70
 -12   5   3   93.09    7.10
 -12   5   3   87.49    6.70
 -12   5   3   95.19    6.30
 -11  -5   3   -0.20    4.90
 -11  -5   3   -0.60    4.00
 -11  -5   3    4.40    4.00
  11  -5  -3   -2.80    2.40
 -11  -5   3    4.00    4.20
 -11  -5   3   -1.90    4.00
  11   5  -3    2.80    3.50
 -11   5   3    1.70    1.80
 -11   5   3    1.60    2.30
  11   5  -3   -0.10    1.70
 -11   5   3    1.60    2.40
 -11   5   3    0.00    2.50
 -11   5   3   -1.10    3.10
  11   5  -3   -0.50    2.00
 -10  -5   3  105.09    8.80
 -10  -5   3  116.69    9.30
  10  -5  -3  115.89    6.30
 -10  -5   3  115.19    9.80
 -10  -5   3  134.89   10.90
 -10  -5   3  108.49    9.40
 -10   5   3  122.39    8.10
 -10   5   3  121.39    6.30
  10   5  -3  126.19    7.20
 -10   5   3  122.49    7.90
 -10   5   3  114.39    5.90
  -9  -5   3   30.40    5.30
  -9  -5   3   24.90    6.80
  -9  -5   3   21.40    5.50
  -9  -5   3   21.40    5.20
  -9   5   3   21.70    2.80
   9   5  -3   26.30    5.70
  -9   5   3   31.90    5.00
  -9   5   3   25.70    4.20
  -9   5   3   25.80    2.80
   9   5  -3   33.90    7.90
  -9   5   3   30.80    4.00
   9   5  -3   25.70    4.50
  -9   5   3   28.10    4.00
  -8  -5   3   82.69    8.80
   8  -5  -3   66.39    6.30
  -8  -5   3   77.59    8.90
   8  -5  -3   69.69    6.00
  -8  -5   3   86.99    8.30
  -8  -5   3   78.19    9.10
  -8  -5   3   83.09    7.60
  -8   5   3   80.09    3.80
   8   5  -3   83.29    7.20
  -8   5   3   89.39    7.00
  -8   5   3   90.59    6.00
  -8   5   3   77.19    6.30
   8   5  -3   70.39    6.70
   8   5  -3   76.19    6.50
  -8   5   3   79.39    5.70
  -8   5   3   73.49    5.60
  -7  -5   3   39.10    6.30
  -7  -5   3   43.30    6.90
  -7  -5   3   41.70    6.00
   7  -5  -3   44.90    5.10
  -7  -5   3   36.50    6.50
  -7  -5   3   42.90    6.50
   7  -5  -3   39.30    5.10
  -7   5   3   41.30    4.80
   7   5  -3   34.20    5.50
  -7   5   3   35.70    2.40
  -7   5   3   31.90    4.60
  -7   5   3   37.60    5.00
   7   5  -3   43.20    6.00
  -7   5   3   38.40    4.80
   7   5  -3   42.90    5.40
  -6  -5   3  578.34   21.10
  -6  -5   3  622.94   20.40
   6  -5  -3  602.94   20.00
  -6  -5   3  619.44   22.20
  -6  -5   3  608.44   22.20
   6  -5  -3  614.94   19.40
  -6  -5   3  608.14   21.60
   6   5  -3  641.44   20.90
   6   5  -3  617.94   21.40
  -6   5   3  595.24   19.00
   6   5  -3  640.34   23.10
  -6   5   3  607.54   14.60
  -6   5   3  635.94   19.40
  -6   5   3  581.74   18.80
  -5  -5   3    2.80    3.40
  -5  -5   3    4.70    3.70
  -5  -5   3    0.90    2.40
  -5  -5   3    1.50    3.40
   5  -5  -3   -2.50    1.90
   5  -5  -3   -6.20    2.60
  -5  -5   3    1.70    3.20
   5  -5  -3    0.30    0.90
  -5  -5   3    1.10    2.50
   5   5  -3   -3.40    2.60
  -5   5   3    1.20    2.40
   5   5  -3   -3.00    1.80
  -5   5   3    0.00    2.40
  -5   5   3   -1.30    2.30
   5   5  -3   -0.60    2.90
   5   5  -3    0.80    2.10
   5   5  -3   -0.50    2.10
  -5   5   3   -0.30    0.80
  -5   5   3    2.30    2.40
   4  -5  -3  156.58    5.80
  -4  -5   3  161.78    9.90
  -4  -5   3  146.79    9.10
  -4  -5   3  153.98    9.20
  -4  -5   3  164.58    9.10
   4  -5  -3  154.38    8.50
   4  -5  -3  169.98    9.60
  -4  -5   3  158.78    9.40
  -4  -5   3  147.59    9.20
  -4  -5   3  164.58    8.90
  -4   5   3  154.78    5.20
   4   5  -3  168.88    8.50
  -4   5   3  167.08    8.60
   4   5  -3  146.89    8.60
  -4   5   3  160.18    8.60
  -4   5   3  165.78    8.50
  -4   5   3  164.18    8.00
   4   5  -3  154.88    9.20
   4   5  -3  161.28    9.50
  -3  -5   3  122.59    9.30
   3  -5  -3  144.99    9.10
   3  -5  -3  141.79    5.40
   3  -5  -3  143.09    8.40
   3  -5  -3  144.49    7.80
  -3  -5   3  143.69    8.00
  -3  -5   3  147.39    8.50
  -3  -5   3  150.78    9.40
  -3  -5   3  145.79    8.50
   3  -5  -3  146.89    6.20
   3   5  -3  147.19   10.20
  -3   5   3  145.69    5.40
   3   5  -3  161.98    8.80
  -3   5   3  145.89    8.20
   3   5  -3  142.99    8.20
  -3   5   3  157.98    8.70
  -3   5   3  143.69    7.50
  -3   5   3  141.79    8.00
   3   5  -3  145.49    9.80
   3   5  -3  152.08    8.50
   3   5  -3  133.19    7.80
   2  -5  -3  161.08    9.40
   2  -5  -3  157.38    8.20
  -2  -5   3  171.18    9.40
  -2  -5   3  156.38    8.80
   2  -5  -3  162.78    9.10
   2  -5  -3  161.78    6.20
  -2  -5   3  167.08   10.20
   2  -5  -3  162.48    6.90
  -2  -5   3  163.38    8.60
  -2  -5   3  177.18    8.70
  -2   5   3  160.58    8.00
  -2   5   3  180.48    9.20
   2   5  -3  164.78    9.30
   2   5  -3  161.78    8.60
   2   5  -3  150.58    9.50
   2   5  -3  149.29    8.50
  -2   5   3  174.38    9.20
  -2   5   3  154.88    6.20
  -1  -5   3   21.60    5.00
  -1  -5   3   35.10    4.70
   1  -5  -3   24.50    3.80
  -1  -5   3   32.30    4.20
   1  -5  -3   28.90    4.90
  -1  -5   3   21.70    4.20
   1  -5  -3   28.70    3.30
  -1  -5   3   34.00    5.10
   1  -5  -3   35.50    4.20
  -1   5   3   38.20    4.70
   1   5  -3   34.20    5.50
  -1   5   3   30.20    5.00
   1   5  -3   32.40    5.10
   1   5  -3   35.60    4.70
  -1   5   3   26.40    4.90
   1   5  -3   39.80    5.00
  -1   5   3   22.80    4.30
   0  -5  -3  820.92   25.30
   0  -5  -3  809.22   23.00
   0  -5  -3  829.22   22.00
   0  -5   3  780.22   23.80
   0  -5   3  819.62   22.20
   0  -5   3  805.82   24.70
   0  -5  -3  846.92   23.80
   0  -5   3  869.11   26.50
   0   5   3  821.82   24.40
   0   5   3  821.82   28.80
   0   5   3  798.12   23.30
   0   5  -3  803.52   26.10
   0   5  -3  804.72   23.90
   0   5  -3  808.12   24.00
   0   5   3  802.72   24.70
   0   5  -3  831.72   24.80
   1  -5   3   37.90    3.50
  -1  -5  -3   40.50    4.50
   1  -5   3   36.60    5.20
   1  -5   3   43.50    6.40
  -1  -5  -3   44.60    5.40
  -1  -5  -3   34.00    4.70
   1  -5   3   34.70    5.30
  -1  -5  -3   35.00    5.30
   1  -5   3   35.80    5.60
  -1   5  -3   25.50    4.40
   1   5   3   31.80    5.40
  -1   5  -3   35.70    5.00
   1   5   3   26.60    4.70
   1   5   3   33.00    5.20
   1   5   3   36.10    5.50
   1   5   3   36.00    5.00
  -1   5  -3   35.00    5.10
  -1   5  -3   35.30    5.70
   2  -5   3   79.49    6.10
   2  -5   3  101.69    7.30
  -2  -5  -3   85.59    6.60
   2  -5   3   89.99    6.90
  -2  -5  -3   89.19    7.10
  -2  -5  -3   75.49    5.90
  -2  -5  -3   92.69    6.40
  -2  -5  -3   86.39    7.10
  -2  -5  -3   79.99    7.30
   2  -5   3   82.99    4.60
   2  -5   3   73.19    6.50
   2   5   3   74.19    6.10
  -2   5  -3   90.39    7.00
   2   5   3   74.19    5.70
  -2   5  -3   87.49    6.70
   2   5   3   71.19    6.70
  -2   5  -3   87.69    6.40
   2   5   3   87.99    7.20
  -2   5  -3   92.99    7.80
   2   5   3   91.29    7.90
   3  -5   3  149.29    8.80
  -3  -5  -3  141.79    8.70
   3  -5   3  137.69    8.10
  -3  -5  -3  140.89    9.50
   3  -5   3  132.79    5.10
  -3  -5  -3  130.19    8.20
  -3  -5  -3  129.89    8.10
  -3  -5  -3  132.39   10.60
   3  -5   3  134.59    8.20
  -3  -5  -3  133.79    8.40
  -3   5  -3  134.19    8.60
  -3   5  -3  126.89    8.30
   3   5   3  135.09    8.10
  -3   5  -3  132.89    8.20
  -3   5  -3  126.19    7.70
   3   5   3  123.49    8.10
   3   5   3  140.99    9.80
   3   5   3  107.49    8.20
  -3   5  -3  132.19    8.90
   3   5   3  130.69    8.80
   4  -5   3   98.19    7.00
   4  -5   3   88.29    7.00
  -4  -5  -3   94.79    7.00
  -4  -5  -3   87.69    7.50
  -4  -5  -3   91.99    7.80
   4   5   3   94.69    8.30
  -4   5  -3  102.79    7.10
   4   5   3   93.39    7.60
  -4   5  -3   85.29    7.40
   4   5   3   96.09    6.90
   4   5   3  102.99    8.80
  -4   5  -3   91.19    7.70
  -4   5  -3   93.39    7.00
  -5  -5  -3   12.80    3.80
  -5  -5  -3   19.20    4.40
   5  -5   3   10.90    4.10
  -5  -5  -3    9.00    4.50
  -5  -5  -3   17.10    4.90
  -5   5  -3    8.70    3.50
  -5   5  -3   18.60    4.70
  -5   5  -3   11.10    4.00
   5   5   3    9.00    3.90
   5   5   3   14.30    4.10
   5   5   3   10.70    4.10
   5   5   3   13.40    5.00
  -6  -5  -3  287.07   13.00
  -6  -5  -3  261.07   12.80
  -6  -5  -3  244.78   13.20
   6  -5   3  262.37   12.60
  -6  -5  -3  283.57   14.10
   6   5   3  264.37   13.70
  -6   5  -3  242.88   12.00
  -6   5  -3  265.57   11.80
   6   5   3  269.47   13.70
  -6   5  -3  272.27   12.80
  -6   5  -3  272.37   12.70
   6   5   3  263.57   12.30
  -7  -5  -3    7.00    3.70
  -7  -5  -3   15.70    5.20
  -7  -5  -3   11.10    4.20
  -7  -5  -3    8.90    4.00
   7  -5   3   12.60    4.50
  -7   5  -3   10.60    4.00
  -7   5  -3   10.40    4.10
   7   5   3   11.80    5.20
   7   5   3   16.10    4.10
   7   5   3   12.00    4.80
  -7   5  -3   11.70    3.80
   7   5   3    9.10    4.50
   8  -5   3  201.28   10.90
  -8  -5  -3  174.28   11.70
  -8  -5  -3  181.18   12.10
  -8  -5  -3  183.78   11.80
  -8   5  -3  172.78   10.60
  -8   5  -3  182.98    9.80
  -8   5  -3  196.28   11.20
   8   5   3  201.48   12.00
   8   5   3  203.68   11.80
   8   5   3  199.58   10.70
  -9  -5  -3   -1.10    3.50
  -9  -5  -3    6.00    5.00
   9  -5   3   -1.30    3.20
  -9  -5  -3    1.00    3.80
  -9   5  -3   -5.30    2.80
  -9   5  -3   -1.30    3.10
   9   5   3   -3.80    2.60
  -9   5  -3   -1.10    3.20
   9   5   3    3.70    4.00
   9   5   3    1.80    4.10
 -10  -5  -3   12.10    5.20
 -10  -5  -3   20.30    6.10
  10  -5   3   28.30    5.30
 -10  -5  -3   19.70    6.40
 -10  -5  -3   28.50    9.90
 -10  -5  -3   26.20    6.50
 -10   5  -3   21.00    5.30
 -10   5  -3   29.10    5.10
 -10   5  -3   23.00    4.90
  10   5   3   36.60    6.20
 -11  -5  -3   -3.80    5.10
 -11  -5  -3    3.50    4.50
 -11  -5  -3   -4.20    4.10
 -11  -5  -3    3.30    5.80
 -11  -5  -3    3.40    5.20
 -11   5  -3   -3.20    3.00
  11   5   3    4.30    4.10
 -11   5  -3    1.00    3.20
  11   5   3    4.60    4.50
 -11   5  -3   -0.30    3.70
 -12  -5  -3   72.59    9.30
 -12  -5  -3   67.99   10.20
 -12  -5  -3   73.79   10.40
 -12  -5  -3   66.19   10.00
 -12   5  -3   77.29    7.10
 -12   5  -3   71.69    8.30
 -13  -6   3   28.60    8.50
 -13  -6   3   25.60    7.50
 -13  -6   3   36.70    7.60
 -13  -6   3   44.00    9.30
 -13   6   3   37.40    5.70
 -12  -6   3    0.90    5.80
 -12  -6   3    4.60    5.10
 -12  -6   3   11.20    7.00
 -12  -6   3    6.40    5.20
 -12   6   3   -1.20    2.00
 -12   6   3    1.60    2.30
 -12   6   3   -1.60    2.00
 -12   6   3   -4.60    3.40
 -11  -6   3   82.69   10.00
 -11  -6   3   73.59    9.60
 -11  -6   3   76.99    9.90
 -11  -6   3   82.49   10.80
 -11  -6   3  104.29   10.70
 -11   6   3   90.39    4.80
  11   6  -3   89.09    8.40
 -11   6   3   87.09    8.40
 -11   6   3   94.09    6.20
  11   6  -3   77.19    7.40
 -10  -6   3   30.80    8.10
 -10  -6   3   16.70    6.30
 -10  -6   3   35.40    7.00
 -10  -6   3   31.50    5.90
 -10   6   3   33.10    4.70
 -10   6   3   23.70    4.20
  10   6  -3   32.90    6.10
 -10   6   3   28.60    5.80
 -10   6   3   27.70    2.80
 -10   6   3   22.70    2.30
  -9  -6   3    0.70    5.20
  -9  -6   3    0.30    3.10
  -9  -6   3    2.90    4.00
  -9  -6   3   -0.20    4.20
  -9  -6   3    2.90    3.90
  -9   6   3    2.50    1.20
  -9   6   3    1.10    1.50
  -9   6   3   -0.80    2.90
   9   6  -3   -0.10    3.30
   9   6  -3   -7.30    3.00
  -9   6   3    3.70    3.00
  -9   6   3    4.60    3.80
   9   6  -3    0.10    3.50
  -8  -6   3  159.18   12.10
  -8  -6   3  156.88   11.00
  -8  -6   3  138.39   10.50
  -8  -6   3  141.99   11.00
   8  -6  -3  150.18    9.00
  -8   6   3  135.29    4.60
  -8   6   3  139.79    8.10
   8   6  -3  146.49   10.00
   8   6  -3  152.88   10.20
  -8   6   3  145.29   10.10
  -8   6   3  145.99    8.70
  -7  -6   3  137.29   10.40
  -7  -6   3  117.89    9.30
   7  -6  -3  126.39    8.90
  -7  -6   3  133.89   10.70
  -7  -6   3  129.09    9.60
   7   6  -3  115.59    9.10
   7   6  -3  123.89    9.20
  -7   6   3  115.19    4.00
  -7   6   3  112.19    9.10
  -6  -6   3    7.30    3.70
  -6  -6   3    6.50    4.80
  -6  -6   3   11.50    4.10
  -6  -6   3    2.80    3.30
   6  -6  -3    8.90    4.10
  -6  -6   3    8.10    4.30
  -6   6   3    8.40    3.60
  -6   6   3    5.60    3.20
  -6   6   3    9.20    1.40
  -6   6   3   14.90    4.60
   6   6  -3    9.00    4.40
   6   6  -3    9.40    4.50
   5  -6  -3  188.68   11.10
  -5  -6   3  179.28   11.60
  -5  -6   3  182.48   11.20
  -5  -6   3  179.98   10.60
  -5  -6   3  177.18   11.70
  -5  -6   3  189.58   11.40
  -5   6   3  166.58    9.80
  -5   6   3  174.98    9.40
  -5   6   3  182.08    6.00
  -5   6   3  194.98   11.40
   5   6  -3  190.58   11.50
   5   6  -3  186.98   11.10
  -5   6   3  170.08    9.70
   4  -6  -3  300.07    8.90
  -4  -6   3  259.27   13.30
  -4  -6   3  295.17   14.40
   4  -6  -3  291.17   14.20
  -4  -6   3  284.07   13.10
  -4  -6   3  286.67   15.20
   4  -6  -3  306.47    9.10
  -4  -6   3  298.17   13.70
  -4   6   3  279.87   12.70
   4   6  -3  287.07   14.20
  -4   6   3  276.97   13.90
   4   6  -3  261.07   13.60
  -4   6   3  276.37   12.90
  -4   6   3  287.57   12.10
  -4   6   3  294.87    8.90
   4   6  -3  291.37   13.50
   3  -6  -3   31.00    6.00
  -3  -6   3   25.20    5.30
  -3  -6   3   23.70    4.90
   3  -6  -3   22.00    3.10
  -3  -6   3   27.80    5.40
   3  -6  -3   29.10    5.20
  -3  -6   3   29.50    5.50
  -3  -6   3   31.80    6.00
  -3   6   3   26.00    4.30
  -3   6   3   22.10    2.80
  -3   6   3   21.30    4.60
  -3   6   3   25.50    5.10
   3   6  -3   29.50    5.90
  -3   6   3   22.80    5.40
  -2  -6   3   17.00    4.80
   2  -6  -3   21.20    3.30
  -2  -6   3   24.90    4.60
  -2  -6   3   21.10    4.20
   2  -6  -3   19.50    3.10
  -2  -6   3   28.90    6.30
   2  -6  -3   21.90    4.10
   2  -6  -3   19.40    5.50
  -2  -6   3   16.80    4.80
  -2   6   3   25.30    3.30
   2   6  -3   23.30    4.40
   2   6  -3   20.60    4.90
  -2   6   3   21.30    4.30
   2   6  -3   14.00    4.20
  -2   6   3   27.60    5.50
  -2   6   3   20.70    5.40
  -2   6   3   31.00    5.50
   1  -6  -3   10.10    3.20
  -1  -6   3   10.00    4.00
  -1  -6   3    9.80    4.80
   1  -6  -3   12.80    4.80
   1  -6  -3   12.10    3.30
  -1  -6   3    4.80    3.70
  -1  -6   3   12.60    3.30
  -1  -6   3    6.70    3.10
   1  -6  -3    8.10    2.60
   1   6  -3    9.80    4.50
  -1   6   3    5.20    3.30
  -1   6   3   16.80    5.20
  -1   6   3   13.20    3.20
   1   6  -3   12.40    4.30
   1   6  -3   10.10    3.80
  -1   6   3    1.60    3.60
   1   6  -3   14.00    5.10
   0  -6   3   45.60    5.00
   0  -6   3   54.29    6.60
   0  -6  -3   55.69    5.20
   0  -6  -3   40.10    4.50
   0  -6   3   60.69    8.10
   0  -6   3   61.69    7.00
   0  -6  -3   43.80    5.60
   0  -6   3   45.80    6.10
   0   6   3   47.40    6.90
   0   6   3   51.79    7.10
   0   6  -3   47.20    7.10
   0   6  -3   42.40    6.70
   0   6  -3   54.99    6.20
   0   6   3   38.70    6.20
   0   6  -3   59.69    7.20
   0   6   3   42.10    6.70
   1  -6   3  127.79    6.50
   1  -6   3  117.79    8.60
  -1  -6  -3  125.89    9.70
  -1  -6  -3  120.29    8.30
  -1  -6  -3  110.59    7.40
   1  -6   3  110.89    8.80
   1  -6   3  118.59    7.90
  -1   6  -3  119.09    8.20
   1   6   3  120.79    8.40
  -1   6  -3  110.79    8.60
   1   6   3  127.29   10.50
   1   6   3  135.09   10.10
  -1   6  -3   99.69    8.50
  -1   6  -3  138.39    9.80
   2  -6   3    3.70    4.00
  -2  -6  -3    3.50    3.00
  -2  -6  -3    3.80    4.60
   2  -6   3    3.90    4.00
  -2  -6  -3    3.70    2.80
  -2  -6  -3    3.10    3.40
   2  -6   3    1.90    1.90
  -2   6  -3    1.60    2.70
  -2   6  -3   -0.90    3.60
   2   6   3    2.10    2.70
   2   6   3    2.00    4.10
  -2   6  -3    8.10    4.30
   2   6   3    3.10    3.90
  -3  -6  -3   61.49    7.30
   3  -6   3   59.19    3.30
  -3  -6  -3   69.19    7.40
  -3  -6  -3   75.19    9.70
   3  -6   3   72.69    7.10
  -3  -6  -3   71.19    6.70
   3  -6   3   58.89    7.40
  -3  -6  -3   80.89    7.80
  -3   6  -3   66.19    8.50
  -3   6  -3   62.49    6.20
   3   6   3   66.59    7.80
   3   6   3   64.49    8.50
   3   6   3   71.29    8.40
  -3   6  -3   67.19    7.50
  -3   6  -3   58.99    7.30
  -4  -6  -3   54.99    7.50
   4  -6   3   41.90    7.40
  -4  -6  -3   34.60    6.80
   4  -6   3   38.40    6.10
  -4  -6  -3   64.99    7.50
  -4  -6  -3   61.39    7.70
   4   6   3   51.89    8.00
   4   6   3   41.70    7.10
  -4   6  -3   46.40    7.00
  -4   6  -3   54.79    6.40
  -4   6  -3   37.40    6.70
  -4   6  -3   50.29    6.60
  -5  -6  -3  190.58   11.00
  -5  -6  -3  205.08   12.20
  -5  -6  -3  200.08   13.50
   5  -6   3  199.58   11.30
  -5  -6  -3  175.88   10.60
  -5   6  -3  197.18   10.80
   5   6   3  175.58   11.60
   5   6   3  197.58   11.70
  -5   6  -3  170.28   11.40
  -5   6  -3  168.28    9.90
  -5   6  -3  187.98   11.60
  -6  -6  -3    1.80    5.30
   6  -6   3    4.10    4.20
  -6  -6  -3   -0.80    3.90
  -6  -6  -3   -1.10    4.80
   6   6   3   -4.80    4.10
  -6   6  -3   -0.30    3.50
   6   6   3   -4.20    3.80
  -6   6  -3    2.00    3.30
  -6   6  -3    4.50    3.60
  -6   6  -3    4.70    4.30
  -7  -6  -3  198.78   12.70
  -7  -6  -3  165.98   12.30
  -7  -6  -3  183.98   12.30
   7  -6   3  195.48   12.00
  -7   6  -3  204.68   10.90
  -7   6  -3  194.28   11.70
   7   6   3  196.88   12.70
   7   6   3  178.58   12.20
  -7   6  -3  197.38   11.90
   8  -6   3   84.89    9.40
  -8  -6  -3   66.29    9.50
  -8  -6  -3   79.39   10.50
  -8  -6  -3   94.69    8.90
  -8  -6  -3   79.79    9.10
  -8   6  -3   78.99    7.60
  -8   6  -3   84.89    9.30
  -8   6  -3   85.09    9.10
   8   6   3   82.69    9.40
   8   6   3   65.49    8.90
  -9  -6  -3    1.10    4.80
  -9  -6  -3   -3.90    4.40
  -9  -6  -3    3.40    3.90
   9  -6   3   -2.50    4.10
  -9  -6  -3    0.10    3.60
  -9   6  -3   -1.30    3.50
  -9   6  -3    2.30    4.10
   9   6   3   -0.50    4.50
   9   6   3    8.90    4.90
 -10  -6  -3   35.40    7.40
  10  -6   3   21.30    5.40
 -10  -6  -3   29.70    7.60
 -10  -6  -3   21.30    6.50
 -10  -6  -3   30.00    6.60
  10   6   3   23.70    6.40
 -10   6  -3   33.00    7.30
  10   6   3   38.20    6.90
 -10   6  -3   29.70    5.70
 -11  -6  -3   60.19   10.00
 -11  -6  -3   64.49   10.90
 -11  -6  -3   42.70    8.50
 -11  -6  -3   48.30    8.30
 -11   6  -3   51.19    7.80
  11   6   3   33.20    7.10
 -11   6  -3   37.00    6.10
  11   6   3   35.50    6.40
 -11  -7   3    9.00    6.10
 -11  -7   3   22.80    6.10
 -11   7   3   22.90    6.30
  11   7  -3   11.50    5.10
 -11   7   3   21.10    4.50
 -11   7   3   15.60    5.50
 -10  -7   3   14.70    5.90
 -10  -7   3   13.40    6.60
 -10  -7   3    8.10    6.60
 -10  -7   3   24.20    7.60
 -10   7   3   22.40    6.10
 -10   7   3   14.90    4.30
 -10   7   3   19.40    4.70
  10   7  -3   23.90    6.30
  10   7  -3   11.30    5.00
  -9  -7   3   45.60    7.80
  -9  -7   3   44.40    8.70
  -9  -7   3   56.29    8.60
   9  -7  -3   55.09    7.00
  -9  -7   3   64.09    8.80
  -9   7   3   63.59    7.00
  -9   7   3   64.19    7.10
  -9   7   3   60.79    8.90
   9   7  -3   60.39    7.70
   9   7  -3   69.09    9.40
  -8  -7   3    2.00    4.70
  -8  -7   3    5.20    5.30
   8  -7  -3    8.50    4.30
  -8  -7   3    5.40    5.00
  -8  -7   3    7.40    4.40
   8   7  -3    7.40    4.80
  -8   7   3    7.20    5.20
   8   7  -3    4.20    5.00
  -8   7   3    9.00    4.20
  -8   7   3    0.10    3.10
  -7  -7   3   -0.60    4.40
  -7  -7   3   -0.20    3.10
  -7  -7   3   -6.40    4.30
   7  -7  -3   -2.90    3.20
  -7  -7   3    2.20    3.50
   7   7  -3   -4.10    3.50
  -7   7   3    1.70    3.30
  -7   7   3    1.40    4.70
   7   7  -3    6.10    4.90
  -7   7   3    2.00    3.20
  -6  -7   3   64.79    7.80
  -6  -7   3   57.79    9.30
   6  -7  -3   49.60    7.80
  -6  -7   3   56.89    8.40
  -6  -7   3   49.20    7.90
  -6   7   3   65.39    7.50
   6   7  -3   67.79    8.80
  -6   7   3   67.49    8.60
  -6   7   3   71.49    7.90
  -5  -7   3    5.70    5.20
  -5  -7   3   12.20    4.30
   5  -7  -3    9.00    5.20
  -5  -7   3   11.10    4.90
  -5  -7   3   14.30    6.00
  -5   7   3    9.40    2.00
   5   7  -3    8.00    5.10
  -5   7   3   18.00    4.90
  -5   7   3   16.60    5.60
   5   7  -3    7.40    4.90
  -5   7   3   14.80    4.90
   4  -7  -3  181.48   11.60
  -4  -7   3  158.68    9.90
  -4  -7   3  173.18   11.20
  -4  -7   3  176.48   12.20
   4  -7  -3  151.38    5.80
   4   7  -3  152.18   11.20
  -4   7   3  166.38   12.00
  -4   7   3  143.09   10.10
   4   7  -3  174.48   12.10
  -3  -7   3   37.70    5.80
  -3  -7   3   28.40    5.90
   3  -7  -3   29.70    5.80
  -3  -7   3   31.80    7.40
  -3  -7   3   34.10    5.90
   3  -7  -3   27.90    3.60
   3  -7  -3   47.40    8.20
   3  -7  -3   26.50    3.70
   3   7  -3   22.20    6.80
  -3   7   3   27.20    6.50
  -3   7   3   28.40    3.60
  -3   7   3   36.00    6.40
   3   7  -3   25.50    6.50
  -3   7   3   23.80    5.50
   2  -7  -3   33.80    4.30
   2  -7  -3   25.30    4.10
  -2  -7   3   34.00    5.60
   2  -7  -3   35.40    6.30
   2  -7  -3   32.80    6.90
  -2  -7   3   34.00    6.80
  -2  -7   3   28.60    5.50
  -2   7   3   29.50    6.20
   2   7  -3   29.50    6.20
   2   7  -3   19.60    6.00
   2   7  -3   23.90    6.10
  -2   7   3   29.60    6.80
  -2   7   3   23.90    5.40
  -1  -7   3  165.18   10.20
   1  -7  -3  137.69    9.10
   1  -7  -3  133.29    7.80
  -1  -7   3  161.58    9.00
   1  -7  -3  146.59    7.70
  -1  -7   3  140.19   10.80
   1  -7  -3  141.39   11.00
  -1  -7   3  140.29    9.30
  -1   7   3  140.39    9.70
  -1   7   3  144.79   10.60
  -1   7   3  142.19   11.50
   1   7  -3  150.48   10.00
   1   7  -3  136.39   10.30
   0  -7  -3  254.37   12.80
   0  -7   3  293.27   15.20
   0  -7   3  238.98   10.50
   0  -7  -3  266.37   15.70
   0  -7  -3  257.17   10.80
   0  -7   3  257.87   12.90
   0  -7  -3  233.38   11.20
   0   7  -3  244.08   13.40
   0   7   3  259.67   13.80
   0   7  -3  254.17   14.60
   0   7   3  262.57   13.70
   0   7   3  249.88   14.90
   1  -7   3    2.20    2.50
   1  -7   3   -1.50    3.10
  -1  -7  -3    6.80    3.50
  -1  -7  -3    0.60    5.00
  -1  -7  -3    3.60    3.20
  -1  -7  -3    5.20    3.60
   1  -7   3   -0.50    3.50
   1   7   3   -2.20    3.80
   1   7   3    3.50    4.40
   1   7   3    6.10    4.60
  -1   7  -3    3.80    4.40
  -1   7  -3   -3.90    3.90
   2  -7   3  103.29    8.80
  -2  -7  -3  112.19    8.50
   2  -7   3  128.59    6.10
  -2  -7  -3  136.99    9.20
  -2  -7  -3  133.69   10.90
   2  -7   3  116.39   10.50
  -2   7  -3  129.49    9.30
   2   7   3  108.19    9.00
  -2   7  -3  125.99   10.60
   2   7   3  130.59   12.00
   2   7   3  144.99   11.10
  -3  -7  -3  168.88   10.30
   3  -7   3  192.98   11.30
   3  -7   3  162.58    5.50
   3  -7   3  198.38   12.90
  -3  -7  -3  173.18   12.70
   3   7   3  189.18   12.00
  -3   7  -3  179.68   11.40
  -3   7  -3  181.78   12.40
  -4  -7  -3   12.20    5.30
   4  -7   3   16.70    5.10
  -4  -7  -3   17.00    5.60
   4  -7   3   22.40    7.10
  -4  -7  -3   19.10    5.10
  -4   7  -3   21.90    5.50
   4   7   3   21.40    6.90
  -4   7  -3   18.50    6.60
  -4   7  -3   26.00    5.90
   4   7   3   25.50    6.50
  -5  -7  -3   32.80    6.10
  -5  -7  -3   34.60    7.10
   5  -7   3   55.09    8.20
  -5  -7  -3   31.30    6.40
  -5   7  -3   40.90    6.90
   5   7   3   36.20    7.40
   5   7   3   37.70    7.50
  -6  -7  -3  106.89    9.40
  -6  -7  -3   88.89   10.90
  -6  -7  -3  101.79    9.70
  -6  -7  -3   90.49    9.70
   6  -7   3  100.89    9.70
  -6   7  -3   84.19    9.20
   6   7   3   85.89   10.50
  -6   7  -3  102.89   10.80
   6   7   3   91.29   10.60
   7  -7   3   30.90    6.80
  -7  -7  -3   24.90    6.00
  -7  -7  -3   36.00    7.80
  -7  -7  -3   40.20    6.70
  -7  -7  -3   40.30    8.70
   7   7   3   36.90    7.80
   7   7   3   30.00    6.70
  -7   7  -3   34.20    6.10
  -7   7  -3   31.60    6.90
  -8  -7  -3    3.80    5.40
  -8  -7  -3   -8.00    4.60
  -8  -7  -3    2.90    5.20
  -8  -7  -3    1.00    3.90
   8  -7   3    6.30    5.10
   8   7   3   -1.10    5.00
  -8   7  -3    0.00    3.80
   8   7   3   -8.60    5.30
  -8   7  -3   -3.20    4.20
  -9  -7  -3  100.39   11.80
  -9  -7  -3   91.19   12.30
  -9  -7  -3  104.09   12.00
  -9  -7  -3   86.19   10.30
   9  -7   3   91.49   10.60
  -9   7  -3   94.89   10.90
   9   7   3   98.89   10.80
   9   7   3  109.39   12.10
  -9   7  -3   91.69    8.50
 -10  -7  -3   31.00    7.70
 -10  -7  -3   10.40    5.50
 -10  -7  -3   31.40    7.40
 -10  -7  -3   22.20    6.40
  10   7   3    7.30    5.80
 -10   7  -3   14.60    5.30
 -10   7  -3   29.60    6.80
  10   7   3   18.70    6.60
  -9  -8   3    9.90    7.60
  -9  -8   3   14.40    7.30
   9  -8  -3   26.90    6.40
  -9  -8   3   15.00    5.40
  -9  -8   3   12.40    5.20
   9   8  -3   22.40    7.00
  -9   8   3   24.30    6.60
   9   8  -3   20.60    6.30
  -8  -8   3   53.59    8.70
   8  -8  -3   44.00    8.20
  -8  -8   3   42.50    7.20
  -8  -8   3   38.80    7.60
  -8  -8   3   54.99   10.00
   8   8  -3   41.80    8.10
  -8   8   3   60.59    8.00
  -8   8   3   52.79    8.60
   8   8  -3   82.19   10.40
  -8   8   3   35.70    7.60
  -7  -8   3   43.00    8.10
  -7  -8   3   52.99    8.20
   7  -8  -3   56.19    8.60
  -7  -8   3   53.79   10.20
  -7  -8   3   43.50    7.40
  -7   8   3   56.19    7.50
  -7   8   3   70.79    9.90
  -7   8   3   48.20    7.40
   7   8  -3   49.20    8.90
   7   8  -3   55.09    9.00
  -6  -8   3    1.10    3.60
  -6  -8   3    1.90    4.70
   6  -8  -3   -2.90    4.50
  -6  -8   3    5.80    5.40
  -6  -8   3    1.70    5.50
  -6   8   3    5.00    4.30
   6   8  -3    1.60    5.00
  -6   8   3   -1.40    4.60
  -6   8   3   -2.90    3.60
   6   8  -3    5.10    5.20
  -5  -8   3  144.09   11.30
  -5  -8   3  124.89   12.30
  -5  -8   3  112.49   10.50
   5   8  -3  119.39   10.20
  -5   8   3  126.49   10.20
  -5   8   3  124.19   10.20
   5   8  -3  133.99   11.90
  -5   8   3  117.79   12.60
  -4  -8   3   51.09    8.20
  -4  -8   3   38.80    6.80
   4  -8  -3   58.49    9.50
  -4  -8   3   58.99    8.00
  -4  -8   3   56.59    9.40
   4  -8  -3   53.39    4.80
  -4   8   3   50.29    7.90
   4   8  -3   38.80    7.90
   4   8  -3   48.80    8.30
  -4   8   3   49.40    7.40
  -4   8   3   47.40    8.70
  -3  -8   3   17.70    6.70
  -3  -8   3   25.30    5.90
   3  -8  -3   18.40    3.90
  -3  -8   3   20.10    6.00
  -3  -8   3   23.20    6.20
   3  -8  -3   17.20    6.50
   3  -8  -3   21.60    3.50
   3   8  -3   20.00    6.60
  -3   8   3   17.70    5.70
  -3   8   3   17.30    5.70
  -3   8   3   18.50    6.80
   3   8  -3   15.00    6.10
  -2  -8   3  129.79    9.10
   2  -8  -3  119.09   11.50
  -2  -8   3  126.69   11.30
   2  -8  -3  110.79    8.00
  -2  -8   3  108.19    9.90
   2  -8  -3  100.19    6.60
  -2  -8   3  104.39   10.20
   2  -8  -3  114.69    9.00
  -2   8   3   98.59   10.70
  -2   8   3   95.29   10.70
   2   8  -3  100.79    9.20
   2   8  -3  109.59   11.90
  -2   8   3   98.59   11.80
   1  -8  -3   96.99   11.90
  -1  -8   3   98.69   10.40
   1  -8  -3  101.49    7.30
   1  -8  -3   91.19    7.00
  -1  -8   3  112.39    8.70
   1  -8  -3  100.09    9.30
  -1   8   3  103.99    9.20
   1   8  -3   80.99    9.90
  -1   8   3   78.19    9.90
  -1   8   3   94.99   11.10
   1   8  -3   97.69   11.40
   0  -8  -3   -1.40    5.10
   0  -8  -3    3.30    3.10
   0  -8   3    6.40    5.50
   0  -8   3    0.10    4.30
   0  -8  -3    3.60    4.60
   0  -8   3    1.50    3.00
   0   8   3   -2.60    3.90
   0   8  -3    3.90    4.70
   0   8  -3   -0.30    4.30
   0   8   3    6.80    5.70
   0   8   3    3.40    5.10
   0   8  -3    0.70    4.90
  -1  -8  -3  117.89   14.70
  -1  -8  -3  111.99    8.00
   1  -8   3  105.79    6.60
   1  -8   3   94.29   11.70
   1  -8   3   91.69    8.90
  -1  -8  -3  123.09   10.10
   1   8   3  102.59   11.90
   1   8   3  115.29   10.00
  -1   8  -3  106.49   10.00
  -1   8  -3  108.29   12.00
  -2  -8  -3  100.59   10.50
   2  -8   3  108.49    9.40
   2  -8   3   98.39    5.50
   2  -8   3  103.69   11.70
  -2  -8  -3   81.29   11.40
  -2  -8  -3   96.09    7.90
  -2   8  -3  103.89   10.00
  -2   8  -3  109.09   11.90
   2   8   3   97.09   11.30
  -2   8  -3  109.79   11.80
   2   8   3  128.69   12.00
  -3  -8  -3    0.00    3.80
   3  -8   3    1.80    4.20
  -3  -8  -3    8.90    6.70
   3  -8   3    5.80    4.10
  -3  -8  -3    4.80    4.10
   3   8   3    9.70    5.60
  -3   8  -3    6.20    3.60
  -3   8  -3   11.50    6.00
  -3   8  -3    6.00    4.70
   3   8   3    6.40    4.90
  -4  -8  -3   53.09    8.30
  -4  -8  -3   57.79    7.70
   4  -8   3   54.09    7.80
  -4  -8  -3   64.99   10.00
   4  -8   3   66.79   10.10
  -4   8  -3   60.89    8.50
   4   8   3   58.79    9.90
  -4   8  -3   57.19    9.10
   4   8   3   73.59   10.50
   5  -8   3   31.40    7.20
  -5  -8  -3   22.70    5.90
  -5  -8  -3   21.90    6.20
  -5  -8  -3   22.20    7.10
   5   8   3   34.80    8.00
  -5   8  -3   31.10    6.70
   5   8   3   29.90    8.20
  -5   8  -3   29.00    7.40
  -6  -8  -3   29.10    8.40
  -6  -8  -3   22.10    5.90
   6  -8   3   27.10    6.80
  -6  -8  -3   33.70    7.20
   6   8   3   21.20    7.40
  -6   8  -3   21.80    6.00
  -6   8  -3   20.70    6.80
   6   8   3   31.60    7.70
  -7  -8  -3   17.50    6.00
  -7  -8  -3    1.80    6.60
  -7  -8  -3    9.20    5.90
  -7   8  -3    8.10    5.40
   7   8   3   14.70    6.80
  -7   8  -3    5.70    5.10
   7   8   3   13.90    6.60
  -8  -8  -3    8.70    5.20
  -8  -8  -3   -1.30    5.40
   8  -8   3    3.80    5.30
  -8  -8  -3    6.40    5.30
   8   8   3    3.00    6.70
  -8   8  -3   11.20    5.40
  -8   8  -3   -1.80    4.30
   8   8   3    9.20    6.50
  -7  -9   3   15.70    6.90
   7  -9  -3   32.90    7.90
  -7  -9   3   20.30    8.20
  -7  -9   3   20.50    5.90
  -7   9   3   23.50    6.60
  -7   9   3   21.30    6.80
   7   9  -3   14.70    7.40
   7   9  -3   12.50    6.60
  -6  -9   3   74.39   10.40
   6  -9  -3   90.59   11.50
  -6  -9   3   86.89   10.90
  -6   9   3   61.29   10.10
  -6   9   3   63.69   10.70
   6   9  -3   79.19   11.00
   6   9  -3   73.69   10.20
  -5  -9   3    2.00    3.80
  -5  -9   3   -1.30    5.40
   5  -9  -3    7.20    5.60
  -5  -9   3    2.00    6.40
  -5  -9   3   -7.20    4.00
   5   9  -3   10.00    5.40
  -5   9   3    3.70    5.10
   5   9  -3   -4.40    5.30
  -5   9   3   -9.30    4.80
  -4  -9   3   28.10    7.00
  -4  -9   3   48.20    9.20
  -4  -9   3   40.90    7.90
   4  -9  -3   50.09    9.50
  -4  -9   3   47.90    7.90
   4   9  -3   35.50    8.40
   4   9  -3   41.00    8.50
  -4   9   3   29.10    8.00
  -4   9   3   30.40    6.80
  -3  -9   3  114.89   10.50
  -3  -9   3  106.39    9.90
   3  -9  -3  116.09   13.90
  -3  -9   3  113.79   11.90
  -3  -9   3  117.39   13.70
  -3   9   3  115.79   13.40
   3   9  -3  117.79   15.40
  -3   9   3   98.79   11.40
   3   9  -3  131.19   11.80
  -2  -9   3   -0.30    4.00
  -2  -9   3    7.20    5.00
   2  -9  -3   -1.60    3.40
   2  -9  -3    5.00    5.10
   2  -9  -3   -2.30    3.40
  -2  -9   3   -5.40    3.50
  -2  -9   3    3.30    5.80
  -2   9   3    2.70    4.30
  -2   9   3  -12.60    5.50
   2   9  -3    1.50    5.80
   2   9  -3   -1.00    3.60
  -2   9   3    5.70    4.30
  -1  -9   3   87.19   12.40
   1  -9  -3   69.69    8.10
   1  -9  -3   67.29    9.40
   1  -9  -3   69.39   11.10
  -1  -9   3   68.99    7.30
   1  -9  -3   82.09    7.10
  -1  -9   3   76.09    9.30
   1   9  -3   69.49   10.90
  -1   9   3   45.30    9.20
   1   9  -3   83.29   10.90
  -1   9   3   58.49    9.30
  -1   9   3   61.99    9.50
   0  -9   3   35.40    8.00
   0  -9   3   38.00    5.40
   0  -9   3   55.49    8.20
   0  -9  -3   38.50    7.70
   0  -9  -3   33.10    5.70
   0  -9  -3   42.50    8.40
   0   9   3   45.90    8.90
   0   9  -3   61.99   10.20
   0   9  -3   46.10    8.10
   0   9   3   36.90    9.40
   1  -9   3    3.30    4.20
  -1  -9  -3    8.70    4.50
  -1  -9  -3    0.60    6.10
   1  -9   3    8.50    3.70
   1  -9   3    7.40    3.50
   1  -9   3    8.10    5.20
  -1  -9  -3    9.70    6.40
  -1   9  -3    7.90    4.80
   1   9   3   13.90    6.50
  -1   9  -3   -4.60    5.30
   1   9   3    9.20    5.50
   2  -9   3   11.20    3.20
   2  -9   3    7.50    2.30
  -2  -9  -3   18.70    5.60
   2  -9   3   14.20    6.70
  -2  -9  -3   11.20    6.20
  -2  -9  -3   11.00    5.20
   2  -9   3   14.00    5.60
   2   9   3   14.60    6.60
   2   9   3   10.40    7.00
  -2   9  -3   19.60    7.90
  -2   9  -3    6.80    5.50
   3  -9   3  128.29   10.70
  -3  -9  -3  129.09   10.60
  -3  -9  -3   87.79   11.00
  -3  -9  -3   99.49   13.80
  -3   9  -3  126.49   10.60
   3   9   3  116.59   13.50
   3   9   3  124.99   13.60
  -3   9  -3  108.69   12.40
  -4  -9  -3    5.30    4.70
   4  -9   3   24.20    7.40
   4  -9   3   15.80    6.10
  -4  -9  -3    3.00    4.10
  -4  -9  -3    7.40    7.40
   4   9   3    6.30    6.30
  -4   9  -3    0.90    4.90
  -4   9  -3   -0.30    4.90
   4   9   3   12.80    7.10
   5  -9   3    5.50    6.30
  -5  -9  -3   11.90    6.60
  -5  -9  -3   33.40    7.00
  -5   9  -3   19.10    7.50
   5   9   3   12.60    8.10
 -16   0   4   61.29    9.10
 -16   0   4   59.09    8.90
 -16   0   4   59.99    7.70
 -15   0   4    0.50    4.20
 -15   0   4   -7.30    4.10
 -15   0   4   -0.60    4.70
 -14   0   4   70.89    8.90
 -14   0   4   90.89    7.60
 -13   0   4    0.50    4.00
 -13   0   4   -2.60    1.40
 -13   0   4   -3.60    2.80
 -13   0   4    3.10    3.90
 -12   0   4   20.70    5.40
 -12   0   4   17.70    4.70
 -12   0   4   26.50    5.50
 -12   0   4   20.70    2.30
 -12   0   4   20.60    2.50
 -11   0   4   -0.70    1.10
 -11   0   4    1.10    3.40
 -11   0   4   -1.80    1.10
 -11   0   4   -1.70    2.60
 -11   0   4    1.00    2.70
 -10   0   4  180.78    8.10
 -10   0   4  170.58    9.90
 -10   0   4  199.28   10.00
 -10   0   4  184.58    6.00
  -9   0   4    1.30    2.90
  -9   0   4   -3.10    2.20
  -9   0   4    2.00    1.90
  -9   0   4   -0.40    1.00
  -8   0   4   79.89    4.60
  -8   0   4   84.69    3.50
  -8   0   4   86.49    5.50
  -8   0   4   82.09    7.10
  -8   0   4   77.59    3.10
  -8   0   4   78.59    2.90
  -8   0   4   81.49    3.20
  -7   0   4    1.10    1.00
  -7   0   4   -0.80    1.00
  -7   0   4   -0.60    1.30
   7   0  -4   -0.30    0.90
  -7   0   4    0.60    1.70
  -7   0   4    0.50    1.20
   7   0  -4   -0.10    1.80
  -7   0   4    0.60    1.90
   6   0  -4   60.19    4.20
  -6   0   4   62.69    4.30
  -6   0   4   57.79    4.80
   6   0  -4   51.29    3.00
   6   0  -4   52.69    2.80
  -6   0   4   58.49    3.40
  -6   0   4   61.09    3.10
  -6   0   4   53.89    2.90
  -6   0   4   56.09    3.00
  -5   0   4   -0.50    0.90
  -5   0   4   -1.60    1.20
  -5   0   4   -0.30    1.00
  -5   0   4   -0.30    1.00
   5   0  -4   -1.70    1.20
  -5   0   4   -0.50    1.30
   5   0  -4   -0.30    1.10
   5   0  -4   -0.90    1.00
  -5   0   4   -0.80    1.80
   5   0  -4   -0.20    1.00
   4   0  -4  801.32   21.30
  -4   0   4  779.02   19.70
  -4   0   4  787.42   20.20
  -4   0   4  776.92   21.10
  -4   0   4  794.62   19.50
   4   0  -4  786.02   19.50
   4   0  -4  775.42   19.90
   4   0  -4  772.32   20.90
  -4   0   4  781.22   19.40
   3   0  -4    0.20    1.30
  -3   0   4   -0.60    1.00
  -3   0   4   -1.00    1.20
   3   0  -4    0.40    1.10
  -3   0   4   -1.30    1.30
   3   0  -4   -0.80    1.00
  -3   0   4   -0.40    1.10
  -3   0   4   -1.00    1.40
   3   0  -4    0.30    0.30
   2   0  -4  351.16    7.90
   2   0  -4  326.67    9.60
   2   0  -4  325.97   10.60
   2   0  -4  331.07    9.90
  -2   0   4  354.06   10.90
  -2   0   4  347.37    9.70
  -2   0   4  328.47   10.60
   2   0  -4  324.67   10.60
   2   0  -4  312.77   10.00
  -2   0   4  321.07   10.10
  -2   0   4  341.07   10.20
  -1   0   4   -0.40    1.50
   1   0  -4   -0.10    1.50
  -1   0   4    1.50    1.70
  -1   0   4   -1.20    1.20
   1   0  -4    0.30    1.30
  -1   0   4   -0.90    1.30
   1   0  -4    1.10    1.50
  -1   0   4    0.70    1.30
   1   0  -4    0.30    1.10
   1   0  -4    0.60    1.60
   0   0  -4 1305.87   30.80
   0   0  -4 1281.27   31.30
   0   0  -4 1270.87   31.30
   0   0   4 1311.07   31.30
   0   0  -4 1263.97   31.30
   0   0  -4 1338.97   32.10
   0   0   4 1217.08   30.80
   0   0   4 1287.37   31.30
   0   0   4 1253.07   31.90
   0   0   4 1278.77   31.40
  -1   0  -4   -1.20    1.30
  -1   0  -4   -0.40    1.10
   1   0   4   -0.40    1.10
   1   0   4    0.60    1.20
  -1   0  -4   -0.40    1.10
  -1   0  -4    1.70    1.40
   1   0   4    1.60    1.70
   1   0   4    0.00    1.30
  -1   0  -4    0.70    1.80
  -1   0  -4   -0.80    0.90
  -2   0  -4  314.17   10.70
   2   0   4  314.67   11.40
   2   0   4  313.97   10.90
  -2   0  -4  301.17   10.00
   2   0   4  305.37   10.50
  -2   0  -4  314.27   10.30
  -2   0  -4  305.47   10.40
  -2   0  -4  291.97   10.90
   2   0   4  294.47   10.20
   3   0   4   -0.20    1.40
  -3   0  -4    0.20    2.00
   3   0   4   -0.70    1.30
   3   0   4    0.50    1.60
   3   0   4   -2.00    1.70
  -3   0  -4    1.20    1.80
  -3   0  -4    0.00    1.80
  -3   0  -4   -1.00    1.40
  -3   0  -4    1.60    2.00
   4   0   4   47.30    4.20
   4   0   4   48.50    3.90
  -4   0  -4   50.49    4.20
  -4   0  -4   44.50    3.80
   4   0   4   46.40    4.00
  -4   0  -4   51.89    4.70
  -4   0  -4   52.29    4.30
  -4   0  -4   47.70    4.90
   4   0   4   50.09    4.10
   5   0   4    2.70    1.90
   5   0   4   -2.10    1.80
  -5   0  -4    0.60    2.20
  -5   0  -4   -1.70    1.70
  -5   0  -4    0.80    2.00
  -6   0  -4  125.69    7.20
  -6   0  -4  128.59    6.80
   6   0   4  124.99    5.80
   6   0   4  122.39    7.00
  -6   0  -4  129.09    7.20
  -6   0  -4  135.89    8.10
   6   0   4  110.69    6.30
  -6   0  -4  114.09    7.30
  -7   0  -4    0.70    2.30
  -7   0  -4    0.70    3.20
  -7   0  -4    1.10    2.40
  -7   0  -4    3.00    2.70
  -7   0  -4    1.60    2.60
   7   0   4   -1.70    2.40
   7   0   4   -0.30    1.40
   7   0   4    0.10    1.90
  -8   0  -4  281.77   11.20
   8   0   4  283.07   11.40
  -8   0  -4  275.67   13.30
  -8   0  -4  269.97   12.40
  -8   0  -4  278.47   12.00
  -9   0  -4   -4.10    2.60
  -9   0  -4   -0.60    2.50
   9   0   4   -2.60    2.30
  -9   0  -4    4.80    4.20
  -9   0  -4   -0.20    2.80
  -9   0  -4   -1.70    2.90
  10   0   4    7.50    3.40
 -10   0  -4    5.90    3.50
 -10   0  -4    3.60    3.30
 -10   0  -4    0.50    4.30
 -10   0  -4   13.60    3.60
 -11   0  -4    2.60    3.10
 -11   0  -4    4.90    3.90
 -11   0  -4   -7.50    4.10
 -11   0  -4   -2.50    2.60
 -12   0  -4   17.10    4.20
 -12   0  -4   15.40    3.80
  12   0   4   22.50    4.80
 -12   0  -4   15.90    6.50
 -12   0  -4   17.00    5.00
 -13   0  -4   -1.00    2.90
 -13   0  -4    1.20    5.30
 -13   0  -4   -1.50    3.50
 -13   0  -4    5.90    4.40
 -13   0  -4    3.10    3.00
  13   0   4    4.50    3.40
 -14   0  -4   29.00    8.60
 -14   0  -4   34.70    4.80
 -14   0  -4   44.90    8.00
 -14   0  -4   35.30    6.20
 -16  -1   4   -1.60    4.00
 -16  -1   4   -1.00    5.30
 -16  -1   4    9.20    5.60
 -16   1   4    2.60    3.90
 -16   1   4    0.30    4.60
 -16   1   4   12.70    5.50
 -15  -1   4   31.20    7.50
 -15  -1   4   28.80    7.00
 -15   1   4   36.40    7.70
 -15   1   4   43.20    6.20
 -15   1   4   33.90    8.00
 -14  -1   4   18.60    6.20
 -14  -1   4   21.60    6.40
 -14  -1   4   20.20    4.90
 -14   1   4    3.20    4.20
 -14   1   4   14.80    5.10
 -14   1   4   18.80    5.10
 -13  -1   4   30.50    6.00
 -13  -1   4   18.30    4.60
 -13  -1   4   19.50    3.50
 -13   1   4   22.60    5.00
 -13   1   4   22.30    5.00
 -13   1   4   21.70    1.50
 -13   1   4   26.50    5.90
 -12  -1   4    7.10    2.50
 -12  -1   4   -2.20    4.00
 -12  -1   4    6.20    3.60
 -12  -1   4    4.40    3.40
 -12   1   4    8.60    0.90
 -12   1   4    6.20    4.10
 -12   1   4    7.90    4.00
 -12   1   4    7.40    0.80
 -12   1   4    7.40    4.10
 -11  -1   4   30.00    2.70
 -11  -1   4   27.80    2.30
 -11  -1   4   23.60    5.20
 -11  -1   4   26.60    4.50
 -11  -1   4   34.10    3.70
 -11  -1   4   21.10    4.70
 -11   1   4   30.30    6.10
 -11   1   4   24.10    4.60
 -11   1   4   33.80    4.50
 -10  -1   4   -0.40    3.00
 -10  -1   4    0.40    1.70
 -10  -1   4    0.40    1.50
 -10  -1   4   -1.10    1.30
 -10  -1   4   -0.90    2.30
 -10  -1   4    0.50    2.60
 -10   1   4    1.30    2.20
  10   1  -4    0.30    0.90
 -10   1   4   -0.10    2.70
  10   1  -4    0.00    0.80
 -10   1   4    1.50    2.60
  -9  -1   4  364.46   10.90
  -9  -1   4  378.76   14.50
  -9  -1   4  381.86   12.50
  -9  -1   4  387.26   15.40
  -9   1   4  332.87   12.50
  -9   1   4  356.46   11.80
   9   1  -4  346.87   12.60
  -8  -1   4    7.20    1.90
  -8  -1   4    6.20    3.60
  -8  -1   4    6.20    1.70
  -8  -1   4    4.10    1.70
  -8  -1   4    7.00    3.30
  -8  -1   4    6.30    2.40
  -8  -1   4    5.90    2.00
  -8   1   4    6.90    0.70
   8   1  -4    8.90    1.70
  -8   1   4    6.20    2.10
  -8   1   4    4.70    2.20
  -8   1   4    6.30    2.80
   8   1  -4   10.40    2.60
   8   1  -4    5.90    2.50
   8   1  -4    8.20    1.70
   7  -1  -4   53.09    2.30
  -7  -1   4   62.09    4.10
  -7  -1   4   62.99    4.80
  -7  -1   4   66.49    4.10
  -7  -1   4   57.99    3.60
  -7  -1   4   60.59    3.70
  -7  -1   4   49.90    4.90
  -7   1   4   56.09    3.50
   7   1  -4   64.99    3.50
  -7   1   4   64.89    4.90
  -7   1   4   55.69    2.40
  -7   1   4   54.19    4.10
   7   1  -4   67.49    4.00
   7   1  -4   66.49    4.10
   7   1  -4   62.19    4.80
  -7   1   4   53.39    2.20
  -7   1   4   56.19    2.20
  -6  -1   4  217.28    7.70
  -6  -1   4  230.98   10.20
  -6  -1   4  240.48    8.30
   6  -1  -4  234.28    6.40
   6  -1  -4  235.98    9.20
  -6  -1   4  228.98    7.90
  -6  -1   4  230.38    7.60
  -6  -1   4  236.38    9.30
   6  -1  -4  235.88    7.00
  -6   1   4  234.58    7.90
   6   1  -4  230.08    8.20
  -6   1   4  242.18    6.90
  -6   1   4  226.78    9.00
  -6   1   4  231.58    6.90
   6   1  -4  238.98    9.60
   6   1  -4  235.28    7.60
   6   1  -4  230.98    7.80
  -6   1   4  233.68    7.10
  -6   1   4  225.58    6.40
   5  -1  -4  384.06   11.10
   5  -1  -4  387.26   10.40
   5  -1  -4  383.76   12.40
  -5  -1   4  401.26   11.40
  -5  -1   4  385.76   11.90
  -5  -1   4  399.36   13.40
  -5  -1   4  395.76   10.80
  -5  -1   4  395.76   11.70
   5  -1  -4  408.66   11.10
  -5  -1   4  401.06   12.80
   5   1  -4  401.96    9.80
  -5   1   4  391.86   12.40
  -5   1   4  398.16   10.90
   5   1  -4  396.26   11.30
   5   1  -4  385.46   10.80
   5   1  -4  390.26   12.70
  -5   1   4  384.26   10.00
  -5   1   4  390.76   10.90
  -5   1   4  395.66   10.30
   5   1  -4  397.16   10.00
   5   1  -4  399.06   12.00
  -5   1   4  389.06   10.80
   5   1  -4  386.66   13.40
   4  -1  -4   23.80    2.20
  -4  -1   4   21.00    2.60
  -4  -1   4   24.80    2.90
   4  -1  -4   21.90    1.90
  -4  -1   4   21.90    1.90
  -4  -1   4   20.40    2.80
  -4  -1   4   22.00    3.40
  -4  -1   4   19.90    2.80
   4  -1  -4   23.10    2.60
   4   1  -4   20.70    2.80
   4   1  -4   22.70    2.50
  -4   1   4   21.80    2.00
   4   1  -4   21.30    2.80
   4   1  -4   16.60    1.90
  -4   1   4   18.30    1.70
  -4   1   4   25.50    2.70
  -4   1   4   19.60    2.60
  -4   1   4   25.40    3.10
  -4   1   4   21.50    1.20
   4   1  -4   28.20    3.60
  -3  -1   4 1087.29   28.10
  -3  -1   4 1116.79   27.70
  -3  -1   4 1085.49   26.90
  -3  -1   4 1117.89   27.30
   3  -1  -4 1099.39   25.30
  -3  -1   4 1097.09   27.30
   3  -1  -4 1123.69   27.20
   3  -1  -4 1138.99   25.70
  -3  -1   4 1068.89   25.30
   3  -1  -4 1105.49   27.60
   3   1  -4 1108.79   26.90
  -3   1   4 1103.79   26.60
   3   1  -4 1074.59   28.70
   3   1  -4 1101.69   26.90
  -3   1   4 1113.49   24.10
   3   1  -4 1092.39   27.60
  -3   1   4 1100.99   25.30
  -3   1   4 1142.29   27.10
  -3   1   4 1110.59   27.70
   3   1  -4 1103.99   28.20
  -3   1   4 1098.89   26.30
   3   1  -4 1128.29   25.50
  -2  -1   4    1.60    1.50
   2  -1  -4    1.70    1.70
  -2  -1   4    2.70    1.50
   2  -1  -4    0.30    1.30
  -2  -1   4    1.30    1.70
  -2  -1   4    4.50    1.80
   2  -1  -4    1.60    1.40
  -2  -1   4    1.20    1.60
   2  -1  -4    1.70    1.00
  -2   1   4    0.10    1.20
  -2   1   4   -2.00    1.20
  -2   1   4    1.40    1.70
  -2   1   4    1.30    1.30
   2   1  -4    1.40    1.80
  -2   1   4    1.10    0.60
   2   1  -4    1.30    1.60
   2   1  -4    1.00    1.20
  -2   1   4    3.80    1.20
   2   1  -4    1.00    1.60
   2   1  -4    2.40    0.90
   1  -1  -4  168.18    5.70
   1  -1  -4  162.58    5.00
  -1  -1   4  173.28    6.60
   1  -1  -4  174.08    6.50
  -1  -1   4  164.68    6.50
   1  -1  -4  157.48    7.50
   1  -1  -4  172.48    6.80
  -1  -1   4  155.08    6.50
   1  -1  -4  162.98    6.50
  -1  -1   4  160.08    6.90
  -1  -1   4  165.88    6.70
  -1   1   4  174.18    6.30
   1   1  -4  177.88    6.70
  -1   1   4  168.28    5.00
   1   1  -4  168.48    6.50
   1   1  -4  168.48    5.60
  -1   1   4  169.58    6.90
   1   1  -4  159.68    6.60
   1   1  -4  163.68    6.50
  -1   1   4  166.08    6.40
   1   1  -4  173.48    7.20
  -1   1   4  160.08    6.80
   0  -1  -4  217.88    7.00
   0  -1  -4  229.38    8.20
   0  -1   4  216.68    8.20
   0  -1  -4  237.78    8.70
   0  -1  -4  216.38    8.00
   0  -1  -4  233.78    7.50
   0  -1   4  244.58    8.40
   0  -1   4  228.28    8.90
   0  -1   4  233.38    8.50
   0   1  -4  230.18    8.30
   0   1  -4  230.78    8.30
   0   1   4  224.48    7.90
   0   1   4  209.98    8.10
   0   1  -4  224.28    8.80
   0   1  -4  227.68    8.10
   0   1   4  215.68    6.80
   0   1   4  222.38    8.40
  -1  -1  -4  653.93   18.40
   1  -1   4  670.33   18.60
  -1  -1  -4  660.33   18.10
   1  -1   4  655.63   18.00
  -1  -1  -4  653.83   17.10
   1  -1   4  667.53   19.30
   1  -1   4  670.33   18.10
  -1  -1  -4  643.14   18.10
  -1  -1  -4  669.03   18.20
   1  -1   4  693.33   19.20
   1   1   4  668.83   18.00
  -1   1  -4  674.93   18.30
  -1   1  -4  634.94   17.90
  -1   1  -4  660.13   18.10
   1   1   4  664.13   18.80
   1   1   4  657.23   18.00
  -1   1  -4  663.43   18.90
   1   1   4  679.13   17.20
   1   1   4  659.43   18.50
  -1   1  -4  634.54   18.30
   2  -1   4   12.50    2.90
  -2  -1  -4   13.00    2.80
   2  -1   4   15.40    2.70
   2  -1   4   15.60    2.40
  -2  -1  -4   18.10    2.80
  -2  -1  -4   15.20    2.70
  -2  -1  -4   13.00    2.70
   2  -1   4   13.90    2.70
  -2  -1  -4   16.00    2.70
   2   1   4   13.10    3.00
  -2   1  -4    9.80    2.40
  -2   1  -4   18.40    2.80
  -2   1  -4   15.80    2.90
  -2   1  -4   16.20    2.70
   2   1   4   12.50    2.40
   2   1   4   16.20    2.60
   2   1   4   12.40    2.90
   2   1   4   15.00    2.60
  -2   1  -4   14.90    2.80
  -3  -1  -4 1134.49   28.50
   3  -1   4 1101.99   28.20
   3  -1   4 1083.79   29.30
   3  -1   4 1160.68   28.20
   3  -1   4 1116.39   28.30
  -3  -1  -4 1072.09   28.90
  -3  -1  -4 1128.49   28.80
  -3  -1  -4 1111.99   28.60
  -3  -1  -4 1114.99   29.00
   3   1   4 1108.09   28.40
  -3   1  -4 1118.59   28.70
   3   1   4 1055.69   29.30
   3   1   4 1102.49   28.20
   3   1   4 1107.99   29.10
   3   1   4 1105.19   28.30
  -3   1  -4 1112.39   29.00
  -3   1  -4 1093.19   29.40
  -3   1  -4 1167.68   28.50
  -3   1  -4 1114.99   27.90
   4  -1   4  143.39    7.50
  -4  -1  -4  139.69    7.00
  -4  -1  -4  155.28    7.50
  -4  -1  -4  152.38    7.70
   4  -1   4  154.98    6.90
   4  -1   4  138.39    6.90
  -4  -1  -4  151.38    7.30
  -4  -1  -4  137.99    7.30
  -4   1  -4  155.58    7.10
  -4   1  -4  138.39    7.20
  -4   1  -4  149.59    7.10
   4   1   4  141.19    6.90
   4   1   4  153.58    7.00
  -4   1  -4  138.29    6.40
  -4   1  -4  139.79    7.20
   4   1   4  151.98    7.60
   4   1   4  130.59    6.70
  -5  -1  -4   10.20    2.90
  -5  -1  -4   12.90    3.30
   5  -1   4    9.40    2.80
  -5  -1  -4   16.80    3.70
  -5  -1  -4   11.50    2.90
   5  -1   4   10.30    2.20
  -5  -1  -4   16.30    3.40
   5  -1   4   16.90    2.90
   5   1   4    7.80    2.70
   5   1   4   13.80    3.30
  -5   1  -4    9.70    2.80
  -5   1  -4   12.90    3.00
  -5   1  -4    7.20    2.70
  -5   1  -4    9.40    2.50
   5   1   4   11.30    2.70
  -6  -1  -4   74.69    5.40
   6  -1   4   59.69    3.90
   6  -1   4   63.69    4.60
  -6  -1  -4   62.99    5.40
   6  -1   4   66.99    5.30
  -6  -1  -4   66.39    6.00
  -6  -1  -4   70.29    5.70
  -6  -1  -4   64.29    5.40
  -6   1  -4   59.89    5.50
  -6   1  -4   53.69    4.90
  -6   1  -4   54.69    5.10
   6   1   4   60.69    4.60
   6   1   4   55.59    4.70
  -6   1  -4   67.79    5.10
  -6   1  -4   60.89    4.90
   6   1   4   64.79    5.40
  -7  -1  -4  456.65   17.00
  -7  -1  -4  465.05   16.30
   7  -1   4  459.75   14.70
  -7  -1  -4  451.05   16.90
  -7  -1  -4  455.45   15.60
   7  -1   4  481.55   15.90
  -7   1  -4  482.85   15.80
   7   1   4  487.85   15.60
  -7   1  -4  487.25   16.00
  -7   1  -4  461.25   17.40
  -7   1  -4  451.15   16.00
   7   1   4  460.65   16.10
  -7   1  -4  472.25   15.40
  -8  -1  -4    0.70    2.50
  -8  -1  -4    1.70    2.60
   8  -1   4   -0.30    2.70
  -8  -1  -4   -0.80    2.40
  -8  -1  -4    1.70    3.30
  -8  -1  -4    0.70    2.30
   8   1   4    4.20    2.90
  -8   1  -4    2.20    2.50
   8   1   4    1.00    2.00
  -8   1  -4    2.10    3.10
  -8   1  -4    7.10    3.00
  -8   1  -4    0.60    2.70
   8   1   4    3.20    1.80
  -8   1  -4    1.80    2.60
  -9  -1  -4  321.87   14.30
  -9  -1  -4  295.87   13.10
  -9  -1  -4  311.47   13.20
   9  -1   4  307.97   12.10
  -9  -1  -4  292.27   12.20
  -9   1  -4  285.67   12.30
  -9   1  -4  282.87   11.60
  -9   1  -4  316.57   12.90
  -9   1  -4  299.07   14.70
  -9   1  -4  279.97   12.60
   9   1   4  300.07   12.60
 -10  -1  -4    2.80    3.80
 -10  -1  -4   -1.10    4.30
 -10  -1  -4    0.50    2.80
 -10  -1  -4   -0.30    2.40
  10   1   4   -0.60    2.50
 -10   1  -4    2.10    2.70
 -10   1  -4    1.90    3.20
 -10   1  -4    1.00    3.50
 -10   1  -4    1.70    4.60
 -10   1  -4    3.20    3.00
 -11  -1  -4    5.00    5.10
 -11  -1  -4    4.40    3.40
 -11  -1  -4   -2.50    2.90
  11  -1   4    1.80    2.70
 -11  -1  -4    0.20    3.00
 -11   1  -4   -0.70    2.70
 -11   1  -4   -0.30    3.50
 -11   1  -4    1.50    2.80
  11   1   4    4.20    3.50
 -12  -1  -4   14.50    5.50
 -12  -1  -4   17.10    4.80
 -12  -1  -4   17.30    5.50
 -12  -1  -4   19.30    4.60
 -12  -1  -4   20.40    4.50
 -12   1  -4   34.80    7.70
 -12   1  -4   11.80    3.50
 -12   1  -4   10.40    3.60
 -12   1  -4   25.40    5.50
  12   1   4   18.40    4.60
  13  -1   4   48.80    5.50
 -13  -1  -4   63.59    9.70
 -13  -1  -4   55.39    6.70
 -13  -1  -4   55.69    8.30
 -13  -1  -4   51.09    7.10
 -13  -1  -4   69.69    6.80
 -13   1  -4   64.79    9.90
 -13   1  -4   53.09    7.30
  13   1   4   62.89    6.90
 -13   1  -4   76.49    6.20
 -13   1  -4   71.49    6.90
 -14  -1  -4   -1.70    3.80
 -14  -1  -4   -0.30    3.20
 -14  -1  -4   -0.20    6.00
 -14   1  -4    1.80    2.50
 -14   1  -4    2.30    4.20
 -14   1  -4   -0.20    4.40
 -16  -2   4   24.70    7.30
 -16  -2   4   24.50    6.20
 -16   2   4   26.60    6.00
 -16   2   4   29.40    5.50
 -15  -2   4    5.20    5.30
 -15  -2   4   10.20    5.90
 -15  -2   4    0.50    3.60
 -15   2   4    7.10    4.60
 -15   2   4   -0.30    3.60
 -15   2   4    0.60    4.10
 -14  -2   4  124.69   11.30
 -14  -2   4  134.69    9.60
 -14  -2   4  104.19    9.90
 -14   2   4  118.89    9.30
 -14   2   4  128.99    9.10
 -14   2   4   99.89    8.90
 -13  -2   4    1.50    3.80
 -13  -2   4    8.80    2.50
 -13  -2   4   16.20    6.20
 -13  -2   4    6.70    3.50
 -13  -2   4    6.00    2.20
 -13  -2   4   11.30    5.70
 -13   2   4   10.10    4.00
 -13   2   4    6.40    3.60
 -13   2   4    9.20    4.40
 -12  -2   4   14.60    2.80
 -12  -2   4    7.80    5.80
 -12  -2   4    7.10    2.60
 -12  -2   4    4.10    3.70
 -12  -2   4   15.00    4.00
 -12  -2   4   17.00    5.70
 -12   2   4    7.00    3.80
 -12   2   4   11.30    3.70
  12   2  -4   13.00    2.90
 -11  -2   4    2.10    4.10
 -11  -2   4   -2.30    2.00
 -11  -2   4    0.30    1.90
 -11  -2   4    0.80    3.10
 -11  -2   4    1.10    2.50
 -11  -2   4    0.60    2.80
  11   2  -4   -2.60    1.50
 -11   2   4   -1.70    3.00
 -11   2   4   -0.60    2.90
 -11   2   4   -0.40    2.40
  11   2  -4   -6.30    2.40
 -10  -2   4  413.76   14.00
 -10  -2   4  380.36   16.80
 -10  -2   4  391.26   16.20
 -10  -2   4  381.96   13.00
 -10  -2   4  434.16   14.60
 -10   2   4  371.36   15.80
  10   2  -4  416.66   12.20
 -10   2   4  431.06   14.10
 -10   2   4  400.76   13.80
  10   2  -4  404.06   14.80
  -9  -2   4   -0.30    2.40
  -9  -2   4    0.70    2.40
  -9  -2   4    2.60    3.60
  -9  -2   4   -1.00    1.80
  -9  -2   4   -1.10    2.00
  -9  -2   4   -0.30    1.90
   9   2  -4    2.30    1.80
  -9   2   4    0.10    1.90
   9   2  -4   -1.00    3.00
   9   2  -4   -0.40    2.40
  -9   2   4   -0.10    2.10
  -9   2   4   -1.40    1.90
   9   2  -4    1.10    1.70
  -8  -2   4  285.07   10.50
  -8  -2   4  291.77   10.50
  -8  -2   4  273.77   10.30
  -8  -2   4  282.77   12.50
  -8  -2   4  285.17   12.90
  -8  -2   4  281.07   10.60
  -8   2   4  289.77    9.70
   8   2  -4  281.17    9.90
   8   2  -4  285.87   10.70
   8   2  -4  257.47   12.20
  -8   2   4  281.57    7.40
  -8   2   4  270.87    7.60
  -8   2   4  288.37    7.30
   8   2  -4  290.87    9.80
  -8   2   4  285.37    9.90
  -8   2   4  298.37   10.80
  -7  -2   4    0.60    1.90
  -7  -2   4    1.10    2.40
  -7  -2   4   -1.30    1.70
  -7  -2   4    2.40    3.00
  -7  -2   4    2.00    2.00
  -7  -2   4    0.10    2.70
   7  -2  -4   -0.30    1.00
   7  -2  -4    0.90    1.10
  -7   2   4   -0.40    1.00
  -7   2   4   -0.30    1.40
  -7   2   4    0.50    1.00
  -7   2   4    2.20    1.90
   7   2  -4    1.80    1.90
   7   2  -4    2.50    1.70
   7   2  -4    0.00    2.10
   7   2  -4    1.60    1.90
  -6  -2   4  293.17    9.80
  -6  -2   4  281.77   10.30
  -6  -2   4  296.27   11.80
  -6  -2   4  277.77   12.10
  -6  -2   4  296.47   10.30
   6  -2  -4  302.37   10.10
   6  -2  -4  298.57    8.90
  -6  -2   4  278.97   10.50
  -6   2   4  286.27    8.50
   6   2  -4  283.77    8.60
  -6   2   4  298.77   10.20
   6   2  -4  290.57   11.70
  -6   2   4  287.47    8.80
   6   2  -4  289.97   10.80
  -6   2   4  293.17    8.40
  -6   2   4  281.17    8.40
   6   2  -4  295.97    9.90
  -6   2   4  303.97    8.80
   6   2  -4  281.77    9.80
   6   2  -4  293.77    9.00
  -5  -2   4    0.70    1.70
  -5  -2   4    0.90    1.60
   5  -2  -4    0.10    1.20
   5  -2  -4   -0.20    1.50
  -5  -2   4    0.60    1.60
   5  -2  -4    0.30    1.20
  -5  -2   4    1.20    1.80
  -5  -2   4    2.00    2.00
  -5  -2   4    0.40    2.30
  -5   2   4    2.30    1.30
  -5   2   4    0.70    1.20
  -5   2   4   -1.10    1.00
   5   2  -4    0.50    1.60
   5   2  -4    6.90    1.90
   5   2  -4   -1.80    1.10
  -5   2   4   -1.10    1.40
  -5   2   4    0.20    0.80
   5   2  -4    0.00    1.40
  -5   2   4    0.70    1.40
   5   2  -4   -0.10    1.60
  -4  -2   4  919.61   24.10
  -4  -2   4  874.71   22.00
   4  -2  -4  882.51   22.30
  -4  -2   4  869.81   23.30
   4  -2  -4  841.82   21.90
  -4  -2   4  882.11   23.10
  -4  -2   4  869.51   23.80
   4  -2  -4  922.51   22.80
  -4  -2   4  877.61   24.50
  -4   2   4  863.61   21.70
   4   2  -4  913.71   23.00
  -4   2   4  852.01   22.70
  -4   2   4  858.61   21.90
  -4   2   4  908.11   22.60
   4   2  -4  910.71   24.20
   4   2  -4  844.82   23.80
  -4   2   4  850.51   19.20
  -4   2   4  888.81   20.70
   4   2  -4  894.81   22.70
  -3  -2   4    1.50    2.00
   3  -2  -4    0.10    1.30
   3  -2  -4   -0.70    1.00
  -3  -2   4   -0.40    1.40
   3  -2  -4   -1.80    1.20
   3  -2  -4    1.60    1.30
  -3  -2   4   -0.40    1.30
  -3  -2   4    0.20    1.80
  -3  -2   4    0.20    1.60
  -3  -2   4   -0.10    1.50
  -3   2   4    0.70    1.50
   3   2  -4    0.30    1.60
  -3   2   4   -0.60    1.20
  -3   2   4   -0.90    1.30
  -3   2   4    0.20    0.90
  -3   2   4    0.30    1.30
   3   2  -4    1.50    1.70
   3   2  -4    1.30    1.50
   3   2  -4    1.00    1.70
   3   2  -4    0.90    1.30
   3   2  -4   -0.40    1.20
  -2  -2   4  362.16   12.00
   2  -2  -4  387.66    9.40
   2  -2  -4  384.76   11.90
   2  -2  -4  379.46   11.90
  -2  -2   4  388.56   11.10
  -2  -2   4  373.56   12.20
   2  -2  -4  384.86   11.30
   2  -2  -4  379.46   12.00
  -2  -2   4  383.46   12.40
   2  -2  -4  382.76   10.30
  -2  -2   4  382.66   12.20
  -2  -2   4  398.26   12.90
  -2   2   4  377.56   11.70
   2   2  -4  377.76   12.30
   2   2  -4  385.96   12.20
   2   2  -4  390.76   11.20
  -2   2   4  374.96   11.50
  -2   2   4  393.76   12.00
  -2   2   4  392.96   10.20
  -2   2   4  374.46   12.20
   2   2  -4  387.36   12.50
   2   2  -4  381.16   12.70
   2   2  -4  418.66   12.40
   1  -2  -4  166.68    7.40
   1  -2  -4  193.28    7.20
  -1  -2   4  172.88    7.50
   1  -2  -4  176.58    7.30
  -1  -2   4  180.28    7.30
  -1  -2   4  185.68    8.10
  -1  -2   4  175.68    7.30
   1  -2  -4  177.88    6.00
  -1  -2   4  172.98    7.30
  -1   2   4  181.88    7.20
   1   2  -4  175.38    7.50
  -1   2   4  181.98    6.00
   1   2  -4  183.88    7.40
   1   2  -4  180.08    8.00
  -1   2   4  191.88    7.40
   1   2  -4  172.78    7.30
  -1   2   4  182.18    7.70
  -1   2   4  183.18    7.20
   1   2  -4  173.48    7.20
   0  -2  -4   36.20    3.80
   0  -2   4   31.30    3.50
   0  -2   4   34.50    3.80
   0  -2  -4   31.20    2.70
   0  -2   4   26.00    3.40
   0  -2  -4   31.30    3.80
   0  -2  -4   30.80    3.80
   0  -2   4   31.30    3.10
   0  -2   4   34.20    4.30
   0  -2  -4   37.70    3.10
   0   2   4   27.80    3.50
   0   2   4   30.30    2.60
   0   2   4   25.10    3.40
   0   2  -4   30.90    3.40
   0   2  -4   27.60    3.60
   0   2  -4   29.50    3.70
   0   2  -4   27.40    3.60
   0   2   4   29.00    3.20
   0   2  -4   32.20    3.00
   0   2   4   29.40    3.40
   0   2  -4   30.10    3.20
   1  -2   4   21.60    3.10
  -1  -2  -4   25.60    3.30
   1  -2   4   18.30    3.10
  -1  -2  -4   22.50    3.40
   1  -2   4   25.70    3.00
  -1  -2  -4   21.80    2.90
   1  -2   4   20.90    3.50
  -1  -2  -4   18.70    3.00
   1  -2   4   21.30    3.20
  -1  -2  -4   21.70    3.20
  -1   2  -4   22.80    2.90
   1   2   4   15.60    3.10
  -1   2  -4   23.60    3.30
   1   2   4   19.40    2.90
   1   2   4   18.40    3.10
   1   2   4   19.90    3.20
   1   2   4   21.30    2.50
  -1   2  -4   19.90    3.20
  -1   2  -4   24.00    3.60
  -2  -2  -4 2294.57   53.19
  -2  -2  -4 2219.08   53.19
  -2  -2  -4 2227.38   53.29
  -2  -2  -4 2253.67   53.69
   2  -2   4 2272.97   53.89
   2  -2   4 2267.37   53.89
  -2  -2  -4 2289.17   52.29
   2  -2   4 2224.98   52.59
   2  -2   4 2212.08   51.79
   2  -2   4 2131.59   52.39
  -2   2  -4 2181.28   52.49
  -2   2  -4 2271.97   53.59
  -2   2  -4 2251.17   51.99
   2   2   4 2250.07   52.89
   2   2   4 2237.68   51.99
   2   2   4 2241.88   53.99
  -2   2  -4 2247.68   53.79
   2   2   4 2169.88   53.69
   2   2   4 2208.98   52.59
  -2   2  -4 2277.17   52.99
   3  -2   4   86.69    5.30
   3  -2   4   93.89    5.00
  -3  -2  -4   85.49    5.50
  -3  -2  -4   98.69    6.00
   3  -2   4   86.09    6.00
  -3  -2  -4   89.59    5.40
  -3  -2  -4   88.89    5.90
  -3  -2  -4   84.19    5.60
   3  -2   4   93.19    5.30
   3   2   4   93.29    5.60
   3   2   4   84.89    5.80
  -3   2  -4   90.99    5.60
   3   2   4   83.79    5.00
  -3   2  -4   95.79    5.00
  -3   2  -4  102.59    6.30
   3   2   4   91.59    5.60
  -3   2  -4   95.69    5.70
  -3   2  -4   90.19    6.00
  -4  -2  -4  551.44   17.30
   4  -2   4  569.74   16.30
   4  -2   4  558.94   16.20
  -4  -2  -4  533.45   17.90
  -4  -2  -4  559.34   17.30
   4  -2   4  559.24   17.80
   4  -2   4  529.85   16.30
  -4  -2  -4  575.14   17.70
  -4  -2  -4  539.95   17.50
  -4   2  -4  569.74   17.90
   4   2   4  578.94   18.10
   4   2   4  543.55   16.80
  -4   2  -4  567.44   16.00
  -4   2  -4  579.54   17.80
   4   2   4  553.44   17.00
  -4   2  -4  564.14   18.80
   4   2   4  550.54   17.00
  -4   2  -4  550.64   16.80
   5  -2   4    0.70    1.80
  -5  -2  -4    0.30    2.80
  -5  -2  -4    4.20    2.50
  -5  -2  -4   -0.10    2.60
  -5  -2  -4    1.90    2.30
  -5  -2  -4    1.40    2.50
   5  -2   4    0.40    2.30
   5   2   4   -3.50    1.80
  -5   2  -4   -0.90    1.70
  -5   2  -4    0.30    2.10
  -5   2  -4    1.70    1.70
  -5   2  -4    1.10    2.20
   5   2   4    2.20    2.10
   5   2   4    4.10    2.40
  -5   2  -4    2.40    2.40
   5   2   4    3.80    2.20
  -6  -2  -4   68.29    6.00
  -6  -2  -4   71.09    7.00
  -6  -2  -4   82.69    6.20
   6  -2   4   81.69    5.20
   6  -2   4   91.29    6.40
   6  -2   4   86.79    4.60
  -6  -2  -4   81.09    6.30
   6   2   4   78.29    6.30
  -6   2  -4   77.09    6.00
   6   2   4   76.69    5.70
   6   2   4   80.59    6.50
  -6   2  -4   82.99    5.80
   6   2   4   83.79    5.80
  -6   2  -4   75.59    5.00
  -6   2  -4   88.29    6.90
  -7  -2  -4    6.80    3.40
  -7  -2  -4    6.90    3.90
   7  -2   4   11.10    2.60
  -7  -2  -4    7.60    3.20
  -7  -2  -4   11.80    3.60
   7  -2   4   14.70    3.50
  -7  -2  -4   10.70    3.50
   7   2   4   13.40    3.30
  -7   2  -4   12.30    3.10
   7   2   4    7.10    2.90
  -7   2  -4    2.20    2.60
  -7   2  -4    7.80    3.00
   7   2   4    8.70    3.20
  -7   2  -4    9.00    3.80
  -7   2  -4    9.60    3.00
   7   2   4    3.80    2.70
   7   2   4    7.00    3.40
  -8  -2  -4  358.26   16.40
   8  -2   4  406.86   14.30
  -8  -2  -4  354.96   15.10
  -8  -2  -4  365.16   14.60
  -8  -2  -4  381.96   14.50
   8   2   4  370.06   12.70
  -8   2  -4  351.66   15.40
   8   2   4  361.66   14.70
  -8   2  -4  343.97   13.60
   8   2   4  357.16   12.30
  -8   2  -4  356.46   13.50
  -8   2  -4  368.36   13.20
  -9  -2  -4   59.89    7.00
   9  -2   4   52.69    6.00
  -9  -2  -4   59.49    6.90
  -9  -2  -4   49.70    6.70
  -9  -2  -4   53.19    6.10
  -9  -2  -4   41.60    6.50
  -9   2  -4   58.79    5.70
   9   2   4   57.09    6.70
  -9   2  -4   66.89    6.90
  -9   2  -4   40.70    7.10
  -9   2  -4   57.19    5.50
  -9   2  -4   58.19    6.30
 -10  -2  -4  125.39    9.20
 -10  -2  -4  101.79   12.70
  10  -2   4  137.89    9.00
 -10   2  -4  124.69    8.20
 -10   2  -4  137.39    8.00
 -10   2  -4  108.69   12.50
 -10   2  -4  113.99    7.50
  10   2   4  134.99    9.10
 -11  -2  -4   16.80    4.90
 -11  -2  -4   24.20    5.60
 -11  -2  -4   28.60    5.10
 -11  -2  -4   17.70    5.60
 -11  -2  -4   21.50    5.50
 -11   2  -4   25.00    4.60
 -11   2  -4   15.80    4.90
 -11   2  -4   29.10    4.90
 -11   2  -4   20.40    5.50
  11   2   4   21.20    4.70
 -11   2  -4   26.40    4.40
 -12  -2  -4   34.70    7.40
 -12  -2  -4   42.00    6.90
 -12  -2  -4   32.90    5.80
  12  -2   4   29.00    4.50
 -12  -2  -4   30.60    7.50
 -12  -2  -4   31.50    5.50
 -12   2  -4   28.90    6.10
 -12   2  -4   29.60    4.60
  12   2   4   23.90    5.20
 -12   2  -4   44.90    8.60
 -12   2  -4   33.10    5.80
  13  -2   4    7.20    3.40
 -13  -2  -4   -3.90    5.20
 -13  -2  -4    2.00    4.70
 -13  -2  -4   12.10    4.40
 -13   2  -4    8.80    4.50
 -13   2  -4   12.00    5.20
 -13   2  -4    3.20    2.90
  13   2   4   17.00    4.90
 -13   2  -4    9.10    3.10
 -14  -2  -4   70.29   11.30
 -14  -2  -4   73.89    8.80
 -14  -2  -4   67.09   12.10
 -14   2  -4   85.79    8.20
 -15  -3   4   11.10    3.40
 -15  -3   4   27.60    6.10
 -15  -3   4    9.10    5.40
 -15  -3   4   15.70    7.00
 -15   3   4   18.80    4.80
 -15   3   4   11.80    5.00
 -15   3   4   13.00    4.50
 -14  -3   4   -0.70    5.40
 -14  -3   4    1.10    4.00
 -14  -3   4   -3.50    2.40
 -14  -3   4   -0.40    2.70
 -14  -3   4    6.50    4.40
 -14   3   4    1.70    1.30
 -14   3   4    0.90    3.40
 -14   3   4    0.20    3.40
 -14   3   4    1.70    3.60
 -14   3   4   -1.30    1.40
 -13  -3   4    0.70    2.60
 -13  -3   4   -2.30    3.00
 -13  -3   4    1.30    3.90
 -13  -3   4    4.60    3.10
 -13  -3   4    3.40    4.00
 -13   3   4    2.00    3.30
  13   3  -4   -0.40    2.20
 -13   3   4   -0.60    3.30
 -12  -3   4   64.09    8.60
 -12  -3   4   70.29    7.70
 -12  -3   4   78.69   10.20
 -12  -3   4   69.49    7.50
 -12  -3   4   68.59    5.90
 -12  -3   4   69.29    6.10
 -12   3   4   73.89    7.40
 -12   3   4   70.79    6.10
  12   3  -4   69.99    5.20
 -12   3   4   66.29    6.40
 -11  -3   4  112.19    7.40
 -11  -3   4  110.69    7.90
 -11  -3   4  119.69   13.20
 -11  -3   4   91.09    7.20
 -11  -3   4   98.19    8.60
 -11  -3   4   97.19    6.90
 -11   3   4  107.39    7.70
 -11   3   4  100.49    6.80
  11   3  -4   77.99    6.60
 -11   3   4   99.59    6.40
 -10  -3   4   24.40    4.40
 -10  -3   4   44.00    6.80
 -10  -3   4   35.10    5.30
 -10  -3   4   30.00    6.30
 -10  -3   4   26.50    4.40
 -10  -3   4   16.90    4.50
 -10   3   4   24.40    4.00
  10   3  -4   35.80    4.40
 -10   3   4   29.80    4.40
 -10   3   4   29.90    3.90
  10   3  -4   27.70    4.90
  -9  -3   4  369.36   13.90
  -9  -3   4  376.96   16.20
  -9  -3   4  357.36   15.30
  -9  -3   4  356.36   13.80
  -9  -3   4  343.87   13.40
  -9  -3   4  357.36   13.50
   9   3  -4  314.47   13.00
   9   3  -4  342.67   12.40
  -9   3   4  354.86   10.30
  -9   3   4  364.36   12.40
  -9   3   4  373.56   11.30
  -9   3   4  342.17    9.40
  -9   3   4  350.96    9.50
   8  -3  -4   21.40    2.30
  -8  -3   4   24.00    4.50
  -8  -3   4   23.40    5.50
  -8  -3   4   20.60    4.30
  -8  -3   4   22.10    4.00
  -8  -3   4   21.80    3.60
   8  -3  -4   28.20    2.60
  -8  -3   4   27.30    4.30
  -8   3   4   24.20    3.50
   8   3  -4   26.50    4.50
  -8   3   4   25.60    2.50
  -8   3   4   24.50    2.70
   8   3  -4   19.50    4.80
  -8   3   4   17.30    2.60
   8   3  -4   16.80    3.60
   8   3  -4   18.20    3.50
   8   3  -4   19.40    2.60
  -8   3   4   26.10    3.60
  -8   3   4   20.30    3.00
  -7  -3   4  114.69    6.80
  -7  -3   4  112.69    8.10
  -7  -3   4  110.69    7.00
   7  -3  -4  111.39    5.30
   7  -3  -4  109.39    5.10
  -7  -3   4  106.39    7.00
  -7  -3   4  113.69    7.90
   7   3  -4  121.79    6.00
   7   3  -4  110.79    6.50
  -7   3   4  109.89    4.30
  -7   3   4  102.19    5.20
  -7   3   4  112.59    5.10
   7   3  -4   89.69    7.00
  -7   3   4  114.19    6.00
  -7   3   4  114.89    4.20
  -7   3   4  107.89    5.10
  -6  -3   4    4.30    2.70
  -6  -3   4   -0.40    1.90
  -6  -3   4    4.40    2.60
  -6  -3   4    6.10    2.50
  -6  -3   4    5.70    2.60
  -6  -3   4    3.40    3.20
   6  -3  -4    0.30    1.60
   6  -3  -4    4.60    1.80
   6   3  -4    3.00    2.10
   6   3  -4    2.40    2.10
   6   3  -4    6.50    2.60
   6   3  -4    0.40    2.10
   6   3  -4    5.40    2.50
  -6   3   4    0.70    1.80
  -6   3   4    2.30    0.60
  -6   3   4    3.90    1.80
  -6   3   4    1.70    0.60
  -6   3   4    3.70    1.70
  -6   3   4    2.20    1.70
   6   3  -4    3.50    2.20
  -5  -3   4  570.84   18.90
  -5  -3   4  570.54   18.20
  -5  -3   4  583.64   18.40
  -5  -3   4  545.15   17.30
   5  -3  -4  574.94   16.30
  -5  -3   4  561.04   16.50
   5  -3  -4  566.34   15.60
  -5  -3   4  553.04   17.80
   5   3  -4  587.74   18.70
  -5   3   4  553.84   15.20
   5   3  -4  550.34   16.70
   5   3  -4  573.34   16.50
   5   3  -4  569.04   18.30
   5   3  -4  552.44   16.60
   5   3  -4  554.84   17.10
  -5   3   4  596.34   16.60
  -5   3   4  565.54   15.80
  -5   3   4  548.05   15.60
  -4  -3   4   25.60    3.50
  -4  -3   4   35.50    4.90
  -4  -3   4   26.40    4.00
   4  -3  -4   30.70    3.40
  -4  -3   4   31.00    4.10
   4  -3  -4   30.00    3.60
   4  -3  -4   28.90    3.50
  -4  -3   4   27.60    4.00
  -4  -3   4   25.00    4.60
  -4   3   4   26.70    3.20
   4   3  -4   32.10    4.30
   4   3  -4   29.10    4.30
  -4   3   4   38.20    4.10
  -4   3   4   35.00    3.60
  -4   3   4   34.40    3.70
   4   3  -4   29.20    3.60
   4   3  -4   36.20    4.30
   4   3  -4   33.40    4.10
   4   3  -4   30.40    3.70
  -3  -3   4 1062.69   28.80
  -3  -3   4 1028.70   27.60
  -3  -3   4  994.80   27.90
   3  -3  -4 1016.40   27.00
  -3  -3   4 1045.30   27.80
   3  -3  -4  989.90   26.70
   3  -3  -4 1043.60   25.40
  -3  -3   4 1023.80   27.80
  -3  -3   4 1027.70   26.30
   3  -3  -4 1023.60   26.20
  -3   3   4 1039.10   27.40
   3   3  -4 1028.70   28.60
   3   3  -4 1036.70   28.00
  -3   3   4 1008.60   26.30
   3   3  -4 1021.50   26.40
  -3   3   4 1044.80   26.00
   3   3  -4 1051.39   27.50
  -3   3   4 1069.89   26.80
   3   3  -4 1063.99   27.60
   2  -3  -4   31.50    3.80
   2  -3  -4   32.00    3.20
  -2  -3   4   33.10    3.90
   2  -3  -4   31.80    3.70
  -2  -3   4   36.20    4.60
   2  -3  -4   33.30    4.10
  -2  -3   4   29.20    4.10
  -2  -3   4   35.20    4.30
  -2  -3   4   31.40    3.70
   2  -3  -4   35.50    4.20
  -2  -3   4   26.20    4.00
  -2   3   4   29.50    3.50
   2   3  -4   28.00    4.00
  -2   3   4   28.00    2.60
   2   3  -4   26.50    3.60
  -2   3   4   27.10    3.40
  -2   3   4   28.30    3.90
  -2   3   4   38.40    4.10
   2   3  -4   25.30    3.90
   2   3  -4   36.00    4.30
   2   3  -4   28.70    3.60
   2   3  -4   28.60    3.80
  -1  -3   4    2.30    2.50
  -1  -3   4    2.90    1.90
  -1  -3   4    3.90    1.80
   1  -3  -4    2.10    2.10
  -1  -3   4    3.80    2.50
   1  -3  -4    3.00    1.80
  -1  -3   4    2.30    2.20
   1  -3  -4    1.20    2.00
   1  -3  -4    2.90    1.60
   1  -3  -4    4.00    1.30
   1  -3  -4   -0.20    1.90
  -1  -3   4    6.00    2.50
  -1   3   4    4.30    1.70
   1   3  -4    3.30    2.00
   1   3  -4    1.90    2.40
   1   3  -4    1.60    2.30
   1   3  -4    3.30    1.90
  -1   3   4    0.50    2.10
  -1   3   4    2.10    1.90
  -1   3   4    2.60    2.10
  -1   3   4    4.20    2.10
   1   3  -4    8.00    2.30
   1   3  -4    3.70    1.80
   0  -3  -4   78.39    4.40
   0  -3   4   79.69    5.60
   0  -3   4   75.29    5.10
   0  -3  -4   68.29    4.10
   0  -3   4   85.19    4.90
   0  -3  -4   74.89    4.70
   0  -3   4   74.69    5.10
   0  -3  -4   83.49    5.40
   0  -3   4   71.09    5.20
   0  -3  -4   83.09    5.70
   0  -3  -4   64.29    5.30
   0   3  -4   84.69    4.80
   0   3  -4   71.99    5.80
   0   3  -4   72.89    4.90
   0   3  -4   71.89    4.60
   0   3   4   77.29    4.90
   0   3   4   71.19    5.30
   0   3   4   75.19    4.20
   0   3  -4   79.89    5.20
   0   3   4   74.39    5.00
   0   3   4   77.49    5.30
   0   3  -4   70.29    5.50
   1  -3   4  954.20   25.20
  -1  -3  -4  885.71   25.40
  -1  -3  -4  934.51   24.20
  -1  -3  -4  902.51   24.90
   1  -3   4  910.31   25.60
   1  -3   4  884.51   25.10
   1  -3   4  907.41   23.80
  -1  -3  -4  910.41   23.90
  -1  -3  -4  929.21   25.90
   1  -3   4  912.91   26.00
  -1  -3  -4  932.11   25.10
  -1   3  -4  928.61   24.70
  -1   3  -4  899.31   26.00
  -1   3  -4  948.41   25.20
   1   3   4  921.51   24.00
  -1   3  -4  894.51   25.10
   1   3   4  936.81   25.30
  -1   3  -4  940.31   23.80
   1   3   4  906.01   24.90
   1   3   4  962.70   26.50
  -1   3  -4  955.80   25.70
  -2  -3  -4    4.70    2.20
   2  -3   4    7.30    2.60
  -2  -3  -4    0.70    2.20
   2  -3   4    3.20    1.90
  -2  -3  -4    1.50    1.80
  -2  -3  -4    1.00    2.10
  -2  -3  -4    3.70    2.70
   2  -3   4    1.90    2.10
   2  -3   4    1.80    2.00
  -2  -3  -4    2.70    2.30
   2  -3   4    5.20    2.40
   2   3   4   12.30    3.40
  -2   3  -4    1.80    1.90
   2   3   4    0.60    2.20
  -2   3  -4    2.80    1.80
   2   3   4    5.30    2.30
   2   3   4    5.80    2.60
  -2   3  -4    2.00    1.90
  -2   3  -4    4.60    2.40
  -2   3  -4    0.60    2.30
  -2   3  -4    3.00    1.60
   3  -3   4  568.54   17.50
  -3  -3  -4  600.14   18.90
   3  -3   4  582.04   17.60
  -3  -3  -4  595.64   19.70
  -3  -3  -4  582.44   18.50
  -3  -3  -4  572.04   18.00
  -3  -3  -4  567.44   18.80
   3  -3   4  584.84   18.90
   3  -3   4  612.64   19.00
  -3  -3  -4  562.14   18.60
   3  -3   4  591.04   16.20
  -3   3  -4  566.04   16.10
  -3   3  -4  605.44   18.40
  -3   3  -4  581.44   18.30
   3   3   4  607.14   19.40
  -3   3  -4  579.24   18.80
   3   3   4  564.44   17.30
   3   3   4  579.64   17.80
   3   3   4  580.24   18.20
  -4  -3  -4   18.10    3.50
   4  -3   4   20.80    3.60
  -4  -3  -4   19.20    3.70
  -4  -3  -4   18.80    3.70
   4  -3   4   21.10    4.10
  -4  -3  -4   19.00    4.10
   4  -3   4   17.30    3.10
  -4  -3  -4   19.70    4.10
   4  -3   4   16.20    2.70
  -4  -3  -4   19.70    4.10
  -4   3  -4   16.80    2.80
   4   3   4   20.10    3.60
   4   3   4   17.70    4.10
  -4   3  -4   17.80    3.40
   4   3   4   15.60    3.30
   4   3   4   19.10    3.80
  -4   3  -4   15.50    3.80
  -4   3  -4   18.20    3.80
  -5  -3  -4    1.30    2.30
   5  -3   4    1.80    2.00
  -5  -3  -4    0.80    2.00
   5  -3   4    0.70    1.90
  -5  -3  -4    1.40    2.80
  -5  -3  -4   -4.70    2.30
  -5  -3  -4   -1.20    2.20
  -5  -3  -4   -0.90    1.90
   5  -3   4    0.30    2.30
  -5   3  -4    2.10    2.20
   5   3   4   -0.40    2.50
  -5   3  -4   -0.40    2.70
  -5   3  -4    0.70    2.30
   5   3   4   -0.80    2.10
   5   3   4    2.80    2.60
  -6  -3  -4    7.70    2.90
  -6  -3  -4    8.60    4.20
  -6  -3  -4   11.40    3.40
  -6  -3  -4   16.40    4.10
   6  -3   4   12.10    3.70
   6  -3   4   10.50    2.80
  -6  -3  -4   11.40    3.70
  -6   3  -4    2.80    2.90
   6   3   4    7.60    3.50
   6   3   4    7.20    3.80
  -6   3  -4    6.60    3.40
   6   3   4   14.50    3.70
   6   3   4   14.00    3.30
  -6   3  -4    7.80    3.10
  -6   3  -4   10.80    4.00
  -6   3  -4    9.30    2.60
  -7  -3  -4  149.59    9.10
  -7  -3  -4  148.79    9.30
  -7  -3  -4  153.78    9.60
  -7  -3  -4  150.48    9.70
  -7  -3  -4  145.49    9.20
   7  -3   4  154.58    9.00
   7   3   4  138.29    8.00
   7   3   4  156.88    9.70
  -7   3  -4  150.68    8.50
  -7   3  -4  151.48    8.40
  -7   3  -4  129.29    8.40
  -7   3  -4  160.18    8.60
   7   3   4  163.48   10.40
  -7   3  -4  151.18    7.20
  -8  -3  -4    4.90    3.40
  -8  -3  -4    9.10    4.90
  -8  -3  -4   10.00    4.70
   8  -3   4   10.50    3.80
  -8  -3  -4    5.70    3.60
  -8  -3  -4   12.20    4.20
   8   3   4   10.10    4.20
  -8   3  -4   10.70    3.60
  -8   3  -4   11.00    3.60
   8   3   4   12.20    6.70
  -8   3  -4   10.80    3.50
  -8   3  -4   11.30    2.90
   8   3   4    9.20    3.60
  -9  -3  -4  103.59    9.30
  -9  -3  -4   70.09    8.10
  -9  -3  -4   80.79    7.40
   9  -3   4   81.09    6.90
  -9  -3  -4   74.69    9.30
  -9  -3  -4   95.69    8.20
   9   3   4  103.99    7.00
  -9   3  -4   80.39    7.00
   9   3   4   84.79    6.50
  -9   3  -4   88.99    6.10
   9   3   4   93.69    8.20
  -9   3  -4   84.49    6.90
  -9   3  -4   79.79    6.80
 -10  -3  -4    0.20    3.70
 -10  -3  -4   -2.40    3.50
 -10  -3  -4    6.70    5.00
 -10  -3  -4   -0.70    3.20
 -10  -3  -4   -0.80    3.00
 -10   3  -4   -0.30    2.90
 -10   3  -4   -5.10    2.60
 -10   3  -4   -1.90    3.40
 -10   3  -4    0.40    3.40
  10   3   4   -0.70    2.60
 -10   3  -4   -3.60    2.70
  10   3   4    2.40    3.70
 -11  -3  -4   -0.20    4.20
 -11  -3  -4   -2.60    3.40
 -11  -3  -4   -8.70    3.80
 -11  -3  -4   -0.40    3.70
 -11  -3  -4    0.00    3.30
  11   3   4   -1.70    3.50
 -11   3  -4   -4.50    3.20
 -11   3  -4    0.80    2.90
 -11   3  -4    9.60    3.30
 -11   3  -4    5.80    3.60
 -11   3  -4    0.20    2.80
 -12  -3  -4   -3.70    4.20
  12  -3   4   -1.80    3.10
 -12  -3  -4    6.00    4.30
 -12  -3  -4   -0.40    3.40
 -12  -3  -4   -3.40    3.50
 -12  -3  -4    7.10    5.80
 -12   3  -4    1.80    2.90
  12   3   4   -7.20    3.80
 -12   3  -4    1.90    3.50
 -12   3  -4   -3.40    5.00
 -12   3  -4    0.70    5.60
 -12   3  -4    5.90    4.20
 -13  -3  -4   25.80    8.00
 -13  -3  -4   29.70    6.30
 -13  -3  -4   23.20    7.60
 -13  -3  -4   25.30    5.70
 -13   3  -4   20.90    4.00
 -13   3  -4   29.20    8.40
 -13   3  -4   23.00    5.40
 -13   3  -4   12.10    3.40
 -14  -4   4   22.20    5.00
 -14  -4   4   19.90    6.10
 -14  -4   4   15.70    7.50
 -14  -4   4   12.30    6.90
 -14   4   4   16.50    3.20
 -14   4   4   11.70    4.30
 -14   4   4   18.10    5.50
 -13  -4   4    2.90    4.50
 -13  -4   4    6.90    4.00
 -13  -4   4    5.80    3.80
 -13  -4   4    3.70    5.60
 -13  -4   4    3.10    4.60
 -13   4   4    4.60    3.70
 -13   4   4    7.00    3.00
 -13   4   4   10.60    2.90
 -13   4   4    3.00    2.30
  13   4  -4   12.20    3.80
 -13   4   4    2.30    4.40
 -13   4   4    8.40    3.70
 -12  -4   4   14.50    6.40
 -12  -4   4   14.80    4.80
 -12  -4   4   27.70    5.90
 -12  -4   4   31.40    5.40
 -12  -4   4   24.10    6.90
 -12   4   4   21.70    3.20
 -12   4   4   19.30    3.60
 -12   4   4   10.10    3.50
 -12   4   4   24.60    5.00
 -11  -4   4   13.40    4.70
 -11  -4   4   17.70    5.10
 -11  -4   4   13.30    4.20
 -11  -4   4    9.20    3.80
 -11  -4   4   21.40    5.80
 -11   4   4   18.10    3.30
 -11   4   4   18.20    3.90
 -11   4   4   11.00    2.90
 -11   4   4   16.00    2.90
  11   4  -4   15.70    3.80
 -11   4   4    8.10    2.70
 -10  -4   4  264.87   13.00
 -10  -4   4  287.57   12.90
  10  -4  -4  281.57    7.60
 -10  -4   4  285.87   15.30
 -10   4   4  279.97    9.40
  10   4  -4  268.37   11.70
 -10   4   4  271.57   11.30
 -10   4   4  273.77    9.90
 -10   4   4  284.07    8.60
  -9  -4   4    6.70    3.20
  -9  -4   4    2.10    3.30
  -9  -4   4    2.10    3.20
  -9  -4   4    2.70    3.60
  -9  -4   4    2.10    3.70
   9  -4  -4    1.40    1.70
  -9  -4   4    1.70    3.30
   9  -4  -4    0.30    1.60
  -9   4   4    1.40    1.90
  -9   4   4    1.00    1.50
  -9   4   4    3.80    2.50
  -9   4   4    1.90    1.80
  -9   4   4    4.00    1.70
  -9   4   4    2.60    2.10
   9   4  -4    0.00    2.40
  -9   4   4   -0.50    1.70
  -8  -4   4   71.99    7.70
  -8  -4   4   74.19    7.00
  -8  -4   4   80.19    6.70
   8  -4  -4   76.59    4.90
  -8  -4   4   85.09    7.50
  -8  -4   4   85.89    7.70
  -8  -4   4   80.89    6.70
   8   4  -4   69.59    6.10
  -8   4   4   83.49    5.00
  -8   4   4   78.29    5.00
  -8   4   4   84.49    5.90
   8   4  -4   77.29    5.90
  -8   4   4   80.79    5.00
   8   4  -4   72.99    6.40
  -8   4   4   74.99    4.50
  -8   4   4   78.69    3.20
  -8   4   4   72.89    3.10
   8   4  -4   85.29    5.50
  -7  -4   4   39.10    5.80
  -7  -4   4   38.70    5.30
   7  -4  -4   38.20    4.40
  -7  -4   4   35.30    5.50
  -7  -4   4   33.00    5.30
  -7  -4   4   40.00    6.00
   7  -4  -4   39.70    4.40
  -7  -4   4   48.10    7.10
  -7  -4   4   49.30    5.70
  -7   4   4   38.40    4.20
  -7   4   4   40.10    3.90
   7   4  -4   43.10    5.40
  -7   4   4   41.50    3.40
  -7   4   4   46.30    4.20
   7   4  -4   47.40    5.00
   7   4  -4   43.00    5.40
   7   4  -4   47.90    5.30
  -7   4   4   43.80    4.20
  -6  -4   4   49.10    5.60
  -6  -4   4   58.19    6.90
   6  -4  -4   55.69    3.50
  -6  -4   4   56.19    5.40
  -6  -4   4   52.69    6.60
  -6  -4   4   55.89    6.70
   6  -4  -4   59.59    4.60
  -6  -4   4   52.59    6.50
   6  -4  -4   53.09    4.60
  -6   4   4   46.10    4.40
   6   4  -4   54.09    6.50
   6   4  -4   42.80    5.40
  -6   4   4   45.20    4.10
   6   4  -4   49.60    5.30
  -6   4   4   42.20    4.30
  -6   4   4   52.49    3.70
   6   4  -4   52.59    6.40
  -6   4   4   52.09    4.60
   6   4  -4   56.29    5.30
   6   4  -4   52.59    6.20
  -5  -4   4  119.39    9.10
   5  -4  -4  141.99    5.80
  -5  -4   4  130.59    7.80
  -5  -4   4  123.89    7.20
  -5  -4   4  123.89    9.70
   5  -4  -4  125.49    7.10
   5  -4  -4  126.29    7.30
  -5  -4   4  131.89   10.10
  -5  -4   4  127.79    8.00
  -5   4   4  134.29    7.00
   5   4  -4  138.09    7.20
  -5   4   4  123.29    6.10
   5   4  -4  125.69    7.70
   5   4  -4  126.09    7.90
   5   4  -4  132.19    7.30
  -5   4   4  124.69    5.60
  -5   4   4  129.49    6.70
   5   4  -4  134.19    7.80
   5   4  -4  128.69    8.50
  -4  -4   4  714.43   22.10
  -4  -4   4  680.53   22.10
  -4  -4   4  688.63   22.50
   4  -4  -4  700.93   18.80
  -4  -4   4  708.53   21.80
   4  -4  -4  671.73   20.60
  -4  -4   4  703.63   21.50
  -4  -4   4  724.43   20.60
   4   4  -4  706.43   21.30
  -4   4   4  676.43   20.00
  -4   4   4  723.83   21.20
   4   4  -4  686.33   20.60
   4   4  -4  710.63   20.60
   4   4  -4  711.53   24.10
  -4   4   4  718.53   18.80
  -4   4   4  716.83   20.50
   4   4  -4  695.63   21.30
  -4   4   4  665.63   19.00
  -3  -4   4   10.60    3.40
  -3  -4   4   14.20    3.40
   3  -4  -4   11.10    3.10
   3  -4  -4   10.00    2.90
  -3  -4   4   11.00    3.10
  -3  -4   4    6.10    3.10
   3  -4  -4   13.20    2.80
  -3  -4   4   14.60    3.50
  -3  -4   4    6.30    3.60
   3   4  -4    6.70    3.10
   3   4  -4    9.10    2.80
  -3   4   4    7.20    2.30
  -3   4   4    7.80    2.30
  -3   4   4   17.00    3.60
   3   4  -4   14.50    2.90
   3   4  -4    7.80    2.80
  -3   4   4   12.40    3.10
   3   4  -4    3.70    2.60
  -3   4   4   11.30    2.60
   2  -4  -4 1062.29   24.10
   2  -4  -4 1061.29   28.60
  -2  -4   4  986.10   29.10
  -2  -4   4 1056.49   28.20
  -2  -4   4 1017.20   28.80
  -2  -4   4 1068.69   30.30
   2  -4  -4 1020.20   26.60
   2  -4  -4 1005.60   28.60
   2  -4  -4 1038.40   26.90
  -2  -4   4 1034.40   28.60
  -2   4   4  998.60   27.60
  -2   4   4 1055.79   28.40
   2   4  -4 1047.90   29.10
   2   4  -4 1048.20   30.20
  -2   4   4 1040.40   29.10
  -2   4   4 1035.50   26.60
   2   4  -4 1062.29   27.80
  -2   4   4 1040.10   27.00
   2   4  -4 1015.60   28.80
   2   4  -4 1060.99   28.80
   1  -4  -4  189.08    6.60
   1  -4  -4  177.98    9.20
  -1  -4   4  162.68    8.80
   1  -4  -4  183.28    8.50
   1  -4  -4  179.68    9.10
   1  -4  -4  177.38    7.80
  -1  -4   4  183.68    8.80
  -1  -4   4  192.68    9.80
  -1  -4   4  181.68    8.10
   1  -4  -4  201.88    8.20
  -1  -4   4  180.68    9.10
  -1  -4   4  178.18    8.30
  -1   4   4  193.08    9.10
  -1   4   4  189.18    7.70
   1   4  -4  187.88    8.90
  -1   4   4  181.78    8.40
   1   4  -4  177.78    9.30
   1   4  -4  172.68    8.60
   1   4  -4  182.68    8.50
  -1   4   4  170.88    9.00
   1   4  -4  188.18   10.00
   0  -4  -4    0.60    1.90
   0  -4   4   -0.40    2.30
   0  -4   4    0.90    1.90
   0  -4  -4    3.10    2.80
   0  -4   4    1.00    2.50
   0  -4  -4    0.30    1.80
   0  -4   4   -0.60    2.50
   0  -4  -4    1.20    1.90
   0  -4  -4   -0.40    2.00
   0  -4  -4    0.20    1.90
   0   4  -4    1.70    2.80
   0   4  -4    5.40    2.70
   0   4  -4    4.80    2.80
   0   4   4    2.70    2.20
   0   4   4    1.70    2.20
   0   4  -4    1.20    2.80
   0   4   4   -1.20    2.00
   0   4   4   -0.90    2.10
   0   4  -4   -0.60    2.40
   1  -4   4   79.19    4.90
  -1  -4  -4   79.89    6.20
   1  -4   4   72.69    6.70
  -1  -4  -4   78.19    6.10
  -1  -4  -4   83.79    5.20
   1  -4   4   79.19    6.30
   1  -4   4   89.69    6.30
  -1  -4  -4   85.79    6.70
  -1  -4  -4   74.99    6.00
   1  -4   4   76.79    6.20
  -1  -4  -4   84.19    5.90
   1   4   4   89.79    7.10
  -1   4  -4   79.09    5.60
   1   4   4   83.89    5.90
  -1   4  -4   72.69    6.50
   1   4   4   85.39    6.10
  -1   4  -4   73.89    4.60
  -1   4  -4   88.79    6.20
  -1   4  -4   72.09    6.30
  -1   4  -4   77.49    5.70
   1   4   4   88.19    5.60
  -2  -4  -4  385.46   14.60
   2  -4   4  401.16   12.30
  -2  -4  -4  402.26   15.30
  -2  -4  -4  424.16   15.70
   2  -4   4  419.66   14.50
   2  -4   4  379.76   14.40
   2  -4   4  403.96   15.30
  -2  -4  -4  402.86   14.70
  -2  -4  -4  424.06   14.40
   2  -4   4  393.96   14.70
  -2  -4  -4  403.26   13.80
  -2   4  -4  392.06   14.30
  -2   4  -4  391.46   14.90
  -2   4  -4  434.06   12.50
   2   4   4  406.26   16.00
  -2   4  -4  421.76   15.90
  -2   4  -4  399.16   14.40
   2   4   4  393.56   13.70
   2   4   4  400.06   14.70
  -2   4  -4  397.16   14.30
   2   4   4  393.86   14.30
  -3  -4  -4    2.70    2.30
  -3  -4  -4   -2.20    2.40
  -3  -4  -4    2.90    3.40
   3  -4   4    2.80    2.50
   3  -4   4    3.50    1.90
  -3  -4  -4    4.50    2.60
   3  -4   4    2.10    2.70
   3  -4   4    4.70    2.70
  -3   4  -4    0.10    2.00
   3   4   4    4.20    3.40
   3   4   4    2.50    2.80
  -3   4  -4    2.80    2.40
  -3   4  -4    1.60    1.60
  -3   4  -4    4.80    3.10
  -3   4  -4    3.10    2.40
   3   4   4    1.80    2.30
   3   4   4    3.00    2.30
  -3   4  -4    6.20    3.10
  -4  -4  -4  182.38    9.50
   4  -4   4  167.98    9.40
   4  -4   4  173.58    8.80
  -4  -4  -4  174.18    9.70
  -4  -4  -4  187.38    9.80
   4  -4   4  200.78    7.10
   4  -4   4  177.88    9.80
  -4  -4  -4  191.68   10.40
   4  -4   4  169.18    8.70
  -4  -4  -4  192.28   10.10
  -4  -4  -4  183.88    9.30
  -4   4  -4  177.38    6.80
  -4   4  -4  186.08    9.80
   4   4   4  176.28   10.60
   4   4   4  186.78   10.30
  -4   4  -4  166.38    9.30
   4   4   4  175.88    9.10
  -4   4  -4  188.78    9.80
  -4   4  -4  183.48    9.90
   4   4   4  169.98   10.50
  -4   4  -4  180.28    9.10
   5  -4   4  106.19    7.80
   5  -4   4  106.09    7.70
  -5  -4  -4   97.19    7.40
   5  -4   4  109.79    6.40
  -5  -4  -4   99.69    7.90
  -5  -4  -4  109.19    7.80
  -5  -4  -4  108.59    8.10
  -5  -4  -4  112.09    8.50
  -5  -4  -4  104.49    7.50
  -5   4  -4  110.59    7.10
  -5   4  -4  111.29    7.80
   5   4   4  111.79    7.70
   5   4   4  105.89    7.70
  -5   4  -4  113.29    8.00
   5   4   4  111.49    8.20
   5   4   4   96.79    7.00
  -5   4  -4  111.29    7.90
  -5   4  -4  103.39    5.00
   6  -4   4   69.39    6.60
  -6  -4  -4   52.19    7.00
  -6  -4  -4   55.99    6.80
  -6  -4  -4   59.29    6.80
  -6  -4  -4   76.09    8.40
  -6  -4  -4   52.99    7.00
  -6   4  -4   61.29    5.80
  -6   4  -4   60.19    6.80
  -6   4  -4   50.89    6.60
   6   4   4   61.09    7.80
   6   4   4   57.69    6.40
  -6   4  -4   58.79    6.60
  -6   4  -4   57.99    3.80
  -7  -4  -4   25.50    5.30
  -7  -4  -4   22.60    5.30
  -7  -4  -4   18.10    4.50
   7  -4   4   19.80    4.70
  -7  -4  -4   13.10    4.80
  -7  -4  -4   17.40    4.70
  -7   4  -4   24.40    4.40
  -7   4  -4   24.00    3.10
  -7   4  -4   19.80    5.10
   7   4   4   13.00    4.20
   7   4   4    9.00    4.70
  -7   4  -4   19.80    4.50
  -8  -4  -4  224.58   12.40
  -8  -4  -4  255.87   13.10
  -8  -4  -4  236.38   13.10
   8  -4   4  215.08   11.80
  -8  -4  -4  224.38   13.00
  -8  -4  -4  219.18   12.60
   8   4   4  259.17   14.20
  -8   4  -4  209.48   11.00
  -8   4  -4  224.18   11.10
  -8   4  -4  216.98   11.20
   8   4   4  228.98   15.30
  -9  -4  -4   22.70    5.70
  -9  -4  -4   12.80    5.70
  -9  -4  -4   15.20    4.90
  -9  -4  -4   18.10    6.10
   9  -4   4   19.10    4.50
  -9  -4  -4   16.30    5.10
   9   4   4    6.80    4.40
  -9   4  -4   16.10    4.30
  -9   4  -4   15.50    4.20
  -9   4  -4   17.80    4.70
  -9   4  -4   11.80    2.90
   9   4   4   12.10    4.00
 -10  -4  -4   60.79    9.00
  10  -4   4   62.09    7.10
 -10  -4  -4   56.89    7.80
 -10  -4  -4   75.79   10.30
 -10  -4  -4   89.19   10.30
 -10  -4  -4   68.89    8.20
  10   4   4   47.70    8.80
  10   4   4   61.19    9.70
  10   4   4   58.69    6.50
 -10   4  -4   65.39    6.60
 -10   4  -4   68.29    4.90
 -10   4  -4   48.10    6.30
 -10   4  -4   72.29    7.10
  11  -4   4   11.10    6.10
 -11  -4  -4   -1.40    3.60
 -11  -4  -4   11.80    6.20
 -11  -4  -4    0.30    4.50
 -11  -4  -4   12.70    5.30
 -11  -4  -4    7.60    6.20
 -11   4  -4    6.20    3.60
  11   4   4   10.60    5.00
  11   4   4    8.30    3.50
  11   4   4    1.00    3.30
 -11   4  -4    0.40    2.70
 -11   4  -4    3.90    4.30
 -11   4  -4   12.60    4.30
 -12  -4  -4    1.60    4.50
  12  -4   4    4.20    3.60
 -12  -4  -4    3.70    4.80
 -12  -4  -4    6.70    6.30
 -12   4  -4    4.10    3.50
 -12   4  -4    3.00    3.40
 -12   4  -4   -0.60    4.00
 -12   4  -4    4.50    6.20
  12   4   4   13.80    5.10
 -13  -4  -4   -3.60    5.80
 -13  -4  -4    6.00    5.10
 -13  -4  -4    2.10    4.60
 -13  -4  -4  -12.80    3.60
 -13   4  -4    0.00    3.00
 -13   4  -4    1.30    4.30
 -14  -5   4    0.60    6.00
 -14  -5   4    3.50    4.50
 -14  -5   4    5.50    6.90
 -14  -5   4    0.60    4.80
 -14   5   4    4.30    4.80
 -14   5   4   11.40    3.80
 -13  -5   4   14.30    4.70
 -13  -5   4   11.50    6.80
 -13  -5   4   22.00    6.90
 -13  -5   4   30.80    6.70
 -13   5   4    8.10    2.80
 -13   5   4   16.80    5.50
 -13   5   4   17.40    4.30
 -12  -5   4    3.80    5.50
 -12  -5   4    2.00    5.40
 -12  -5   4    1.30    4.10
 -12  -5   4   -1.60    4.20
 -12  -5   4   -3.20    3.50
 -12   5   4   -1.00    0.80
 -12   5   4    4.50    4.60
 -12   5   4   -1.10    2.00
  12   5  -4   -0.30    3.30
 -12   5   4    5.80    3.20
 -11  -5   4   58.39    7.90
 -11  -5   4   80.59    7.80
 -11  -5   4   77.49    9.00
  11  -5  -4   83.09    5.70
 -11  -5   4   74.69   10.20
 -11  -5   4   65.29    9.50
 -11   5   4   61.69    3.80
 -11   5   4   65.69    3.70
 -11   5   4   57.69    5.30
 -11   5   4   68.69    4.40
  11   5  -4   57.59    7.00
 -11   5   4   72.29    7.10
  11   5  -4   50.69    3.40
 -10  -5   4   -1.50    3.40
 -10  -5   4    4.10    4.10
 -10  -5   4    1.60    3.80
 -10  -5   4    2.40    4.00
 -10  -5   4    9.50    4.70
  10  -5  -4    6.00    2.40
 -10   5   4    5.40    3.10
 -10   5   4    3.50    2.70
 -10   5   4    3.40    1.40
 -10   5   4    2.10    1.20
  10   5  -4    5.00    3.20
  10   5  -4    2.10    2.90
 -10   5   4    3.60    2.30
  -9  -5   4  283.07   13.10
  -9  -5   4  233.38   16.30
  -9  -5   4  258.37   15.80
  -9  -5   4  295.57   14.90
  -9  -5   4  257.67   13.50
  -9   5   4  263.67   10.40
   9   5  -4  313.77   13.30
  -9   5   4  257.27   11.20
  -9   5   4  256.87   10.30
  -9   5   4  256.27   10.80
   9   5  -4  304.97   15.40
  -8  -5   4   11.70    4.70
  -8  -5   4   14.00    4.30
  -8  -5   4   17.40    4.70
  -8  -5   4   22.10    5.10
   8  -5  -4   28.00    6.70
  -8  -5   4   24.00    6.10
   8   5  -4   16.60    4.10
  -8   5   4   22.20    3.90
  -8   5   4   21.80    3.80
  -8   5   4   18.60    3.80
   8   5  -4   15.90    4.40
   8   5  -4   21.50    4.80
  -8   5   4   15.50    3.60
  -7  -5   4   23.90    5.00
  -7  -5   4   33.90    6.50
  -7  -5   4   30.60    5.90
   7  -5  -4   32.50    4.90
  -7  -5   4   33.10    6.20
  -7  -5   4   22.80    4.50
  -7   5   4   27.50    4.30
  -7   5   4   35.40    4.90
   7   5  -4   19.70    4.70
  -7   5   4   27.90    4.50
   7   5  -4   31.50    5.20
   6  -5  -4   77.29    3.70
  -6  -5   4   76.19    8.40
   6  -5  -4   84.79    7.10
  -6  -5   4   85.49    7.90
  -6  -5   4   81.69    7.90
  -6  -5   4   72.59    8.20
   6  -5  -4   68.19    6.90
  -6  -5   4   74.09    6.80
  -6   5   4   86.69    5.90
  -6   5   4   64.09    5.60
  -6   5   4   85.89    6.30
   6   5  -4   89.89    6.80
   6   5  -4   79.69    7.00
   6   5  -4   89.89    9.50
  -6   5   4   83.69    6.30
   6   5  -4   77.69    7.30
   5  -5  -4  309.37   12.80
  -5  -5   4  346.37   14.40
  -5  -5   4  326.37   13.20
   5  -5  -4  341.47   13.90
  -5  -5   4  317.47   14.30
  -5  -5   4  338.57   15.00
  -5  -5   4  316.87   13.80
   5  -5  -4  327.17    9.90
  -5   5   4  313.37   13.90
  -5   5   4  349.27   12.30
  -5   5   4  326.27   13.00
  -5   5   4  311.47   12.50
   5   5  -4  304.07   12.90
   5   5  -4  318.87   13.90
   5   5  -4  306.27   13.10
   5   5  -4  318.47   13.70
   4  -5  -4    3.20    3.20
   4  -5  -4    2.10    1.90
  -4  -5   4    0.70    2.80
  -4  -5   4   -1.50    3.00
  -4  -5   4   -1.80    1.80
   4  -5  -4    1.60    2.70
  -4  -5   4   -2.00    2.20
  -4  -5   4   -1.10    2.30
  -4  -5   4    1.60    3.20
   4   5  -4   -1.80    2.60
   4   5  -4    2.10    2.60
   4   5  -4    0.50    3.10
  -4   5   4    1.30    2.60
   4   5  -4    1.30    2.50
  -4   5   4   -0.20    2.10
  -4   5   4    3.80    2.60
   4   5  -4   -0.50    3.20
   4   5  -4   -4.70    2.30
  -3  -5   4  556.84   18.80
   3  -5  -4  570.44   13.80
  -3  -5   4  557.44   19.40
  -3  -5   4  540.85   19.10
  -3  -5   4  517.35   19.50
  -3  -5   4  574.94   20.70
   3  -5  -4  546.05   18.80
   3  -5  -4  561.54   17.60
   3  -5  -4  567.64   16.40
  -3  -5   4  529.05   18.20
   3   5  -4  558.74   18.70
   3   5  -4  539.05   20.50
   3   5  -4  589.74   19.90
   3   5  -4  576.04   19.70
  -3   5   4  534.75   18.10
  -3   5   4  549.25   17.10
   3   5  -4  557.54   19.30
   3   5  -4  580.94   18.50
  -3   5   4  570.94   18.70
  -2  -5   4  102.69    7.50
   2  -5  -4   97.99    4.50
   2  -5  -4   97.19    5.80
  -2  -5   4   90.79    7.50
  -2  -5   4   92.79    6.50
   2  -5  -4   96.69    6.90
  -2  -5   4  104.29    7.50
   2  -5  -4   85.09    6.20
   2   5  -4   99.49    7.00
  -2   5   4   90.79    6.50
   2   5  -4   98.69    7.10
  -2   5   4   98.69    7.30
  -2   5   4  104.89    6.30
   2   5  -4   94.59    7.30
   2   5  -4  111.79    8.80
  -2   5   4   95.09    6.90
   2   5  -4  124.99    8.50
   1  -5  -4   24.60    3.00
  -1  -5   4   22.80    4.70
  -1  -5   4   17.00    4.30
   1  -5  -4   23.70    3.70
  -1  -5   4   17.40    3.40
   1  -5  -4   18.10    3.90
  -1  -5   4   14.50    3.40
  -1  -5   4   22.20    4.80
   1  -5  -4   21.70    4.60
   1  -5  -4   29.20    4.50
  -1  -5   4   27.80    5.00
  -1   5   4   24.00    4.00
   1   5  -4   13.70    4.20
   1   5  -4   21.00    4.30
  -1   5   4   15.60    3.90
  -1   5   4   22.80    3.90
  -1   5   4   25.60    4.50
   1   5  -4   20.40    4.20
   1   5  -4   14.00    3.70
   0  -5   4  143.69    8.40
   0  -5  -4  158.28    7.10
   0  -5  -4  164.38    9.70
   0  -5  -4  149.39    9.20
   0  -5   4  149.09    7.30
   0  -5  -4  151.18    7.90
   0  -5  -4  160.88    8.10
   0  -5   4  144.59    8.90
   0  -5   4  134.29    8.50
   0  -5   4  136.59    9.10
   0   5  -4  160.48    8.90
   0   5  -4  153.78   10.10
   0   5  -4  144.39    8.40
   0   5   4  156.58    9.50
   0   5   4  143.29    7.90
   0   5   4  156.58    8.70
   0   5  -4  162.28    9.30
   0   5   4  128.19    7.90
   1  -5   4  179.68   10.80
  -1  -5  -4  189.38   10.20
   1  -5   4  171.38    9.80
   1  -5   4  182.78    7.80
  -1  -5  -4  180.68    9.00
  -1  -5  -4  185.48    9.50
  -1  -5  -4  167.98    8.20
  -1  -5  -4  167.68    9.00
  -1  -5  -4  173.28    9.90
   1  -5   4  179.08    9.90
  -1   5  -4  168.28   10.50
   1   5   4  176.28    8.60
  -1   5  -4  188.58    9.30
  -1   5  -4  177.98    9.90
   1   5   4  173.38    9.70
   1   5   4  161.88    9.00
  -1   5  -4  186.58    9.90
   1   5   4  183.48   10.90
   2  -5   4    2.00    1.90
  -2  -5  -4    1.50    3.20
   2  -5   4    0.30    2.30
  -2  -5  -4    2.90    3.10
   2  -5   4    0.00    2.80
  -2  -5  -4    1.40    2.80
  -2  -5  -4    3.50    3.30
  -2  -5  -4    1.30    3.00
   2  -5   4    2.00    2.90
   2   5   4    4.80    3.10
  -2   5  -4    0.50    3.00
  -2   5  -4    3.20    3.50
  -2   5  -4   -0.30    3.00
  -2   5  -4    4.50    2.80
   2   5   4    0.50    2.50
  -2   5  -4    2.20    3.00
   2   5   4   -0.60    3.10
   2   5   4   -1.10    1.70
  -3  -5  -4  176.58   10.00
   3  -5   4  192.08    7.20
  -3  -5  -4  194.38    9.60
  -3  -5  -4  174.28   10.10
   3  -5   4  177.68    9.40
   3  -5   4  174.58   11.70
  -3  -5  -4  188.98   10.10
  -3  -5  -4  179.28   10.90
   3  -5   4  186.58   10.50
  -3  -5  -4  185.28   11.00
   3  -5   4  192.08    9.90
  -3   5  -4  180.98   10.90
  -3   5  -4  188.68   10.00
   3   5   4  169.88    9.80
   3   5   4  159.28   11.30
  -3   5  -4  209.88   10.40
   3   5   4  198.88   11.50
   3   5   4  177.28    9.20
  -3   5  -4  187.58   10.60
  -4  -5  -4  101.79    8.10
  -4  -5  -4   88.49    8.30
  -4  -5  -4  101.39    8.40
  -4  -5  -4   97.39    7.20
   4  -5   4   90.39    7.20
   4  -5   4   93.69    8.00
  -4  -5  -4  100.09    7.90
   4  -5   4   89.69    7.40
   4  -5   4   98.89    4.60
   4   5   4   97.39    8.30
   4   5   4   91.39    7.80
  -4   5  -4   96.69    8.00
  -4   5  -4   98.39    7.60
   4   5   4   98.09    8.70
  -4   5  -4   95.49    8.10
  -4   5  -4   91.29    7.30
  -5  -5  -4   91.39    7.70
  -5  -5  -4   82.79    7.70
  -5  -5  -4   86.49    8.20
  -5  -5  -4   94.29    8.70
   5  -5   4   94.89    8.00
  -5  -5  -4   84.49    7.20
  -5   5  -4   93.29    7.30
  -5   5  -4   74.99    7.10
  -5   5  -4   85.19    7.50
  -5   5  -4   83.39    7.70
   5   5   4   90.19   11.20
   5   5   4   86.89    9.50
  -6  -5  -4   19.10    4.60
   6  -5   4   22.30    5.30
  -6  -5  -4   28.80    6.30
  -6  -5  -4   26.30    5.70
  -6  -5  -4   15.10    5.20
  -6  -5  -4   14.10    5.00
  -6   5  -4   18.20    4.50
  -6   5  -4   16.50    4.70
   6   5   4   28.90    6.50
   6   5   4   14.40    4.70
  -6   5  -4   22.90    4.70
  -7  -5  -4   86.19    8.20
   7  -5   4  122.49    9.20
  -7  -5  -4  112.59    9.90
  -7  -5  -4   99.39    9.50
  -7  -5  -4  101.09    8.50
  -7  -5  -4  118.19    9.30
  -7   5  -4  114.29    8.90
  -7   5  -4  114.09    8.60
   7   5   4  125.39   10.60
   7   5   4  122.79    9.70
  -8  -5  -4    2.20    4.40
  -8  -5  -4   -3.20    4.00
  -8  -5  -4    6.20    4.90
   8  -5   4    2.70    3.60
  -8  -5  -4   -4.90    3.90
   8   5   4    0.50    4.30
  -8   5  -4   -5.60    3.00
  -8   5  -4    9.20    3.60
  -8   5  -4    4.10    3.60
   8   5   4   -1.00    4.10
  -9  -5  -4   77.89    9.40
   9  -5   4   86.89    8.40
  -9  -5  -4   78.09   10.30
  -9  -5  -4  112.89    9.90
  -9  -5  -4   81.89    9.50
  -9  -5  -4   60.39    8.70
  -9   5  -4   83.49    7.80
  -9   5  -4   91.29    7.90
   9   5   4   89.69    8.30
   9   5   4   90.89    8.70
   9   5   4   64.49    8.50
   9   5   4   94.69   10.70
  -9   5  -4   99.49    8.90
 -10  -5  -4   -0.70    3.70
  10  -5   4    1.30    4.10
 -10  -5  -4    2.00    4.60
 -10  -5  -4    4.00    4.80
 -10  -5  -4    4.70    4.40
  10   5   4    7.50    4.80
 -10   5  -4    1.20    3.40
 -10   5  -4   10.40    4.40
  10   5   4    3.10    4.70
 -10   5  -4    3.70    4.40
  10   5   4    8.90    5.10
 -11  -5  -4    5.40    6.10
 -11  -5  -4    1.20    4.40
 -11  -5  -4    3.50    5.80
  11   5   4    3.20    4.80
 -11   5  -4    4.00    4.30
  11   5   4   -2.20    4.00
 -11   5  -4    5.80    4.10
 -11   5  -4   -0.70    4.00
 -12  -5  -4   10.80    6.10
 -12  -5  -4   10.40    6.10
 -12  -5  -4    7.00    7.20
 -12  -5  -4   -5.60    4.50
 -12   5  -4   10.90    4.50
 -12   5  -4   13.40    6.10
 -13  -6   4   23.50    6.70
 -13  -6   4   17.60    6.30
 -13  -6   4    5.70    7.30
 -13   6   4   19.10    5.00
 -12  -6   4   12.70    5.50
 -12  -6   4   -1.70    4.30
 -12  -6   4    8.60    6.30
 -12  -6   4   16.20    6.30
 -12   6   4    5.50    2.40
 -12   6   4    7.50    4.40
 -12   6   4   10.30    2.60
  11  -6  -4   40.20    4.80
 -11  -6   4   44.20    8.40
 -11  -6   4   37.60    7.40
 -11  -6   4   46.20    8.80
 -11  -6   4   34.60    7.20
 -11  -6   4   41.20    7.20
  11   6  -4   67.09    8.30
 -11   6   4   45.70    6.80
  11   6  -4   33.40    5.40
 -11   6   4   52.19    4.90
 -11   6   4   52.99    5.10
 -10  -6   4   60.79    8.70
 -10  -6   4   60.89    9.50
 -10  -6   4   61.59    9.20
 -10  -6   4   53.99    8.30
 -10  -6   4   58.19    8.30
 -10   6   4   63.49    5.80
  10   6  -4   67.19    8.30
 -10   6   4   71.29    6.10
 -10   6   4   51.79    7.20
  -9  -6   4   14.00    4.80
  -9  -6   4   13.30    5.20
  -9  -6   4   15.70    4.90
[truncated: 618,109 more chars]
