# Supplementary material for: Metal Complexes Containing Homoleptic Diorganoselenium(II) Ligands: Synthesis, Characterization and Investigation of Optical Properties
Source: Molecules. 2024 Feb 8;29(4):792. doi: 10.3390/molecules29040792 (PMC10892405; doi:10.3390/molecules29040792)
Supplement: Supplementary file 1 [file molecules-29-00792-s001.zip › Cpd_5_CCDC_2308731.cif]

data_global

_publ_requested_journal          Molecules

_publ_contact_author_name        'Alexandra Pop'
_publ_contact_author_address     
;Supramolecular Organic and Organometallic Chemistry Centre, Department of Chemistry, Faculty of Chemistry and Chemical Engineering, Babes-Bolyai University, Str. Arany Janos 11, RO-400028 Cluj-Napoca, Romania
;
_publ_contact_author_email       alexandra.m.pop@Ubbcluj.ro
_publ_contact_author_phone       ?
_publ_contact_author_fax         ?
loop_
_publ_author_name
_publ_author_address
'Darius, Dumitras'
;Supramolecular Organic and Organometallic Chemistry Centre, Department of Chemistry, Faculty of Chemistry and Chemical Engineering, Babes-Bolyai University, Str. Arany Janos 11, RO-400028 Cluj-Napoca, Romania
;
'Gal, Emese'
;Research Center on Fundamental and Applied Heterochemistry, Faculty of Chemistry and Chemical Engineering, Babes-Bolyai University, 11 Arany Janos street, RO-400028, Cluj-Napoca, Romania
;
'Silvestru, Cristian'
;Supramolecular Organic and Organometallic Chemistry Centre, Department of Chemistry, Faculty of Chemistry and Chemical Engineering, Babes-Bolyai University, Str. Arany Janos 11, RO-400028 Cluj-Napoca, Romania.
;
'Pop, Alexandra'
;Supramolecular Organic and Organometallic Chemistry Centre, Department of Chemistry, Faculty of Chemistry and Chemical Engineering, Babes-Bolyai University, Str. Arany Janos 11, RO-400028 Cluj-Napoca, Romania.
;
_audit_creation_method           'APEX4 v2021.10-0'

_publ_section_title              
;
;
_publ_section_abstract           
;
;
_publ_section_references         
;
;
_publ_section_comment            
;
; 
data_shelx
 
_audit_creation_method            'SHELXL-2018/3'
_shelx_SHELXL_version_number      '2018/3'
_chemical_name_systematic         ?
_chemical_name_common             ?
_chemical_melting_point           ?
_chemical_formula_moiety          'C32 H20 N2 O4 Se' 
_chemical_formula_sum
 'C32 H20 N2 O4 Se' 
_chemical_formula_weight          575.46

loop_
 _atom_type_symbol
 _atom_type_description
 _atom_type_scat_dispersion_real
 _atom_type_scat_dispersion_imag
 _atom_type_scat_source
 'C'  'C'   0.0033   0.0016
 'International Tables Vol C Tables 4.2.6.8 and 6.1.1.4'
 'H'  'H'   0.0000   0.0000
 'International Tables Vol C Tables 4.2.6.8 and 6.1.1.4'
 'N'  'N'   0.0061   0.0033
 'International Tables Vol C Tables 4.2.6.8 and 6.1.1.4'
 'O'  'O'   0.0106   0.0060
 'International Tables Vol C Tables 4.2.6.8 and 6.1.1.4'
 'Se'  'Se'  -0.0929   2.2259
 'International Tables Vol C Tables 4.2.6.8 and 6.1.1.4'
 
_space_group_crystal_system       orthorhombic
_space_group_IT_number            18
_space_group_name_H-M_alt         'P 21 21 2'
_space_group_name_Hall            'P 2 2ab'
 
_shelx_space_group_comment
;
The symmetry employed for this shelxl refinement is uniquely defined
by the following loop, which should always be used as a source of
symmetry information in preference to the above space-group names.
They are only intended as comments.
;
 
loop_
 _space_group_symop_operation_xyz
 'x, y, z'
 '-x, -y, z'
 '-x+1/2, y+1/2, -z'
 'x+1/2, -y+1/2, -z'
 
_cell_length_a                    13.7518(6)
_cell_length_b                    19.5095(10)
_cell_length_c                    4.7253(3)
_cell_angle_alpha                 90
_cell_angle_beta                  90
_cell_angle_gamma                 90
_cell_volume                      1267.75(12)
_cell_formula_units_Z             2
_cell_measurement_temperature     100(2)
_cell_measurement_reflns_used           9367
_cell_measurement_theta_min             2.5599
_cell_measurement_theta_max             25.7220

_exptl_crystal_description              needle
_exptl_crystal_colour             yellow
_exptl_crystal_density_meas       ?
_exptl_crystal_density_method     ?
_exptl_crystal_density_diffrn     1.508          
_exptl_crystal_F_000              584
_exptl_transmission_factor_min    ?
_exptl_transmission_factor_max    ?
_exptl_crystal_size_max           0.131
_exptl_crystal_size_mid           0.087
_exptl_crystal_size_min           0.045
_exptl_absorpt_coefficient_mu     1.524
_shelx_estimated_absorpt_T_min    0.825
_shelx_estimated_absorpt_T_max    0.935
_exptl_absorpt_correction_type          Multi-Scan
_exptl_absorpt_process_details          
;
Krause, L., Herbst-Irmer, R., Sheldrick G.M. & Stalke D.,
J. Appl. Cryst. 48 (2015) 3-10
;
_exptl_absorpt_correction_T_min         0.88
_exptl_absorpt_correction_T_max         0.94
_exptl_absorpt_special_details    ?
_diffrn_ambient_temperature       100(2)
_diffrn_radiation_wavelength      0.71073
_diffrn_radiation_type            MoK\a
_diffrn_radiation_monochromator         'multilayer optics'

_diffrn_measurement_device              ?
_diffrn_measurement_device_type         'Bruker D8 Venture'
_diffrn_measurement_method              '\f and \w scans'

_diffrn_detector_area_resol_mean        7.3910
_diffrn_reflns_number             37153
_diffrn_reflns_av_unetI/netI      0.0402
_diffrn_reflns_av_R_equivalents   0.0723
_diffrn_reflns_limit_h_min        -18
_diffrn_reflns_limit_h_max        18
_diffrn_reflns_limit_k_min        -26
_diffrn_reflns_limit_k_max        25
_diffrn_reflns_limit_l_min        -6
_diffrn_reflns_limit_l_max        6
_diffrn_reflns_theta_min          2.088
_diffrn_reflns_theta_max          28.306
_diffrn_reflns_theta_full         25.242
_diffrn_measured_fraction_theta_max   0.999
_diffrn_measured_fraction_theta_full  0.999
_diffrn_reflns_Laue_measured_fraction_max    0.999
_diffrn_reflns_Laue_measured_fraction_full   0.999
_diffrn_reflns_point_group_measured_fraction_max   0.999
_diffrn_reflns_point_group_measured_fraction_full  0.999
_reflns_number_total              3165
_reflns_number_gt                 2756
_reflns_threshold_expression      'I > 2\s(I)'
_reflns_Friedel_coverage          0.693
_reflns_Friedel_fraction_max      0.998
_reflns_Friedel_fraction_full     0.999
 
_reflns_special_details
;
 Reflections were merged by SHELXL according to the crystal
 class for the calculation of statistics and refinement.
 
 _reflns_Friedel_fraction is defined as the number of unique
 Friedel pairs measured divided by the number that would be
 possible theoretically, ignoring centric projections and
 systematic absences. Completness statistics refer to single and
 composite reflections containing twin component 1 only.
;
 
_computing_data_collection              'Bruker APEX4 2021.10-0'
_computing_cell_refinement              'SAINT V8.40B (Bruker AXS LLC, 2019)'
_computing_data_reduction               'SAINT V8.40B (Bruker AXS LLC, 2019)'
_computing_structure_solution     'SHELXT 2018/2 (Sheldrick, 2018)'
_computing_structure_refinement 'SHELXL-2018/3 (Sheldrick, 2018)'
_computing_molecular_graphics           'shelXle (C.B. Huebschle, rev 1328)'
_computing_publication_material         'Bruker APEX4 2021.10-0'
_refine_special_details
;
 Refined as a 2-component inversion twin.
;
_refine_ls_structure_factor_coef  Fsqd
_refine_ls_matrix_type            full
_refine_ls_weighting_scheme       calc
_refine_ls_weighting_details
'w=1/[\s^2^(Fo^2^)+(0.0126P)^2^+0.6936P] where P=(Fo^2^+2Fc^2^)/3'
_atom_sites_solution_primary      ?
_atom_sites_solution_secondary    ?
_atom_sites_solution_hydrogens    geom
_refine_ls_hydrogen_treatment     constr
_refine_ls_extinction_method      none
_refine_ls_extinction_coef        .
_refine_ls_abs_structure_details
;
 Refined as an inversion twin.
;
_refine_ls_abs_structure_Flack    0.024(12)
_chemical_absolute_configuration  ?
_refine_ls_number_reflns          3165
_refine_ls_number_parameters      178
_refine_ls_number_restraints      0
_refine_ls_R_factor_all           0.0451
_refine_ls_R_factor_gt            0.0325
_refine_ls_wR_factor_ref          0.0598
_refine_ls_wR_factor_gt           0.0558
_refine_ls_goodness_of_fit_ref    1.043
_refine_ls_restrained_S_all       1.043
_refine_ls_shift/su_max           0.000
_refine_ls_shift/su_mean          0.000
 
loop_
 _atom_site_label
 _atom_site_type_symbol
 _atom_site_fract_x
 _atom_site_fract_y
 _atom_site_fract_z
 _atom_site_U_iso_or_equiv
 _atom_site_adp_type
 _atom_site_occupancy
 _atom_site_site_symmetry_order  
 _atom_site_calc_flag
 _atom_site_refinement_flags_posn
 _atom_site_refinement_flags_adp
 _atom_site_refinement_flags_occupancy
 _atom_site_disorder_assembly
 _atom_site_disorder_group
Se1 Se 0.000000 0.500000 0.11595(8) 0.02534(11) Uani 1 2 d S T P . .
O1 O 0.35181(14) 0.68908(10) 0.6203(5) 0.0265(5) Uani 1 1 d . . . . .
O2 O 0.23639(16) 0.69894(11) 0.2797(5) 0.0339(6) Uani 1 1 d . . . . .
N1 N 0.32648(18) 0.58001(13) 0.7723(6) 0.0249(6) Uani 1 1 d . . . . .
C1 C 0.0805(2) 0.45230(15) 0.3914(7) 0.0228(6) Uani 1 1 d . . . . .
C2 C 0.1600(2) 0.48403(14) 0.5240(6) 0.0218(7) Uani 1 1 d . . . . .
C3 C 0.2113(2) 0.44634(16) 0.7300(7) 0.0249(7) Uani 1 1 d . . . . .
H3 H 0.264211 0.467109 0.826482 0.030 Uiso 1 1 calc R U . . .
C4 C 0.1856(2) 0.37964(16) 0.7938(7) 0.0279(7) Uani 1 1 d . . . . .
H4 H 0.220613 0.355102 0.934499 0.033 Uiso 1 1 calc R U . . .
C5 C 0.1092(2) 0.34843(15) 0.6535(7) 0.0278(7) Uani 1 1 d . . . . .
H5 H 0.092959 0.302117 0.693864 0.033 Uiso 1 1 calc R U . . .
C6 C 0.0561(2) 0.38497(15) 0.4532(7) 0.0263(7) Uani 1 1 d . . . . .
H6 H 0.003076 0.363758 0.358629 0.032 Uiso 1 1 calc R U . . .
C7 C 0.1879(2) 0.55364(15) 0.4501(7) 0.0242(7) Uani 1 1 d . . . . .
H7 H 0.150626 0.573912 0.302926 0.029 Uiso 1 1 calc R U . . .
C8 C 0.2587(2) 0.59406(15) 0.5587(7) 0.0250(7) Uani 1 1 d . . . . .
C9 C 0.2746(2) 0.66452(16) 0.4561(7) 0.0269(7) Uani 1 1 d . . . . .
C10 C 0.3778(2) 0.63535(15) 0.7962(7) 0.0241(7) Uani 1 1 d . . . . .
C11 C 0.4598(2) 0.64713(16) 0.9825(7) 0.0244(7) Uani 1 1 d . . . . .
C12 C 0.5105(3) 0.70860(15) 0.9780(6) 0.0289(7) Uani 1 1 d . . . . .
H12 H 0.491237 0.744022 0.852011 0.035 Uiso 1 1 calc R U . . .
C13 C 0.5892(2) 0.71852(17) 1.1566(8) 0.0315(8) Uani 1 1 d . . . . .
H13 H 0.623664 0.760709 1.153798 0.038 Uiso 1 1 calc R U . . .
C14 C 0.6173(2) 0.66672(17) 1.3390(8) 0.0321(8) Uani 1 1 d . . . . .
H14 H 0.670861 0.673545 1.462665 0.039 Uiso 1 1 calc R U . . .
C15 C 0.5676(2) 0.60480(17) 1.3421(8) 0.0330(8) Uani 1 1 d . . . . .
H15 H 0.588181 0.569018 1.464515 0.040 Uiso 1 1 calc R U . . .
C16 C 0.4881(3) 0.59511(15) 1.1673(6) 0.0293(7) Uani 1 1 d . . . . .
H16 H 0.452905 0.553215 1.173125 0.035 Uiso 1 1 calc R U . . .
 
loop_
 _atom_site_aniso_label
 _atom_site_aniso_U_11
 _atom_site_aniso_U_22
 _atom_site_aniso_U_33
 _atom_site_aniso_U_23
 _atom_site_aniso_U_13
 _atom_site_aniso_U_12
Se1 0.02713(19) 0.0300(2) 0.01886(19) 0.000 0.000 0.0016(2)
O1 0.0294(11) 0.0221(11) 0.0281(12) 0.0036(11) -0.0016(11) -0.0005(9)
O2 0.0354(13) 0.0281(12) 0.0382(15) 0.0094(11) -0.0064(11) 0.0011(10)
N1 0.0271(13) 0.0242(14) 0.0235(14) 0.0017(11) -0.0006(11) 0.0014(11)
C1 0.0249(14) 0.0248(14) 0.0188(14) -0.0003(15) 0.0062(14) 0.0057(11)
C2 0.0212(13) 0.0227(18) 0.0217(15) -0.0014(12) 0.0054(11) 0.0043(11)
C3 0.0226(15) 0.0251(16) 0.0268(17) 0.0015(14) 0.0028(13) 0.0027(12)
C4 0.0274(16) 0.0274(17) 0.0289(18) 0.0048(14) 0.0049(13) 0.0074(14)
C5 0.0294(16) 0.0225(15) 0.032(2) 0.0035(15) 0.0076(15) 0.0034(12)
C6 0.0277(16) 0.0245(16) 0.0268(19) -0.0033(13) 0.0038(13) 0.0016(13)
C7 0.0239(15) 0.0243(16) 0.0245(18) 0.0030(13) 0.0038(13) 0.0031(13)
C8 0.0265(15) 0.0223(15) 0.0262(19) 0.0023(13) 0.0021(13) 0.0033(13)
C9 0.0261(16) 0.0247(16) 0.030(2) 0.0011(14) 0.0006(14) 0.0024(13)
C10 0.0285(16) 0.0213(16) 0.0226(17) 0.0017(13) 0.0027(13) 0.0058(13)
C11 0.0262(14) 0.0247(16) 0.0223(16) -0.0010(14) 0.0026(12) 0.0018(13)
C12 0.0321(18) 0.0285(15) 0.0261(15) -0.0004(12) 0.0029(17) -0.0015(16)
C13 0.0320(17) 0.0333(18) 0.029(2) -0.0033(16) 0.0043(15) -0.0050(14)
C14 0.0261(16) 0.0404(19) 0.030(2) -0.0040(17) -0.0005(15) 0.0018(14)
C15 0.0349(17) 0.0319(18) 0.032(2) -0.0013(16) -0.0049(16) 0.0078(14)
C16 0.0313(18) 0.0253(14) 0.0312(17) -0.0003(12) -0.0003(17) 0.0013(15)
 
_geom_special_details
;
 All esds (except the esd in the dihedral angle between two l.s. planes)
 are estimated using the full covariance matrix.  The cell esds are taken
 into account individually in the estimation of esds in distances, angles
 and torsion angles; correlations between esds in cell parameters are only
 used when they are defined by crystal symmetry.  An approximate (isotropic)
 treatment of cell esds is used for estimating esds involving l.s. planes.
;
 
loop_
 _geom_bond_atom_site_label_1
 _geom_bond_atom_site_label_2
 _geom_bond_distance
 _geom_bond_site_symmetry_2
 _geom_bond_publ_flag
Se1 C1 1.946(3) 2_565 ?
Se1 C1 1.946(3) . ?
O1 C10 1.385(4) . ?
O1 C9 1.399(4) . ?
O2 C9 1.193(4) . ?
N1 C10 1.295(4) . ?
N1 C8 1.401(4) . ?
C1 C6 1.387(4) . ?
C1 C2 1.404(4) . ?
C2 C3 1.409(4) . ?
C2 C7 1.453(4) . ?
C3 C4 1.382(4) . ?
C4 C5 1.384(4) . ?
C5 C6 1.392(4) . ?
C7 C8 1.354(4) . ?
C8 C9 1.474(4) . ?
C10 C11 1.449(4) . ?
C11 C12 1.387(4) . ?
C11 C16 1.394(4) . ?
C12 C13 1.386(5) . ?
C13 C14 1.383(5) . ?
C14 C15 1.388(5) . ?
C15 C16 1.383(4) . ?
 
loop_
 _geom_angle_atom_site_label_1
 _geom_angle_atom_site_label_2
 _geom_angle_atom_site_label_3
 _geom_angle
 _geom_angle_site_symmetry_1
 _geom_angle_site_symmetry_3
 _geom_angle_publ_flag
C1 Se1 C1 96.02(18) 2_565 . ?
C10 O1 C9 105.6(2) . . ?
C10 N1 C8 105.2(3) . . ?
C6 C1 C2 120.8(3) . . ?
C6 C1 Se1 117.1(2) . . ?
C2 C1 Se1 122.1(2) . . ?
C1 C2 C3 117.9(3) . . ?
C1 C2 C7 120.7(3) . . ?
C3 C2 C7 121.5(3) . . ?
C4 C3 C2 121.0(3) . . ?
C3 C4 C5 120.2(3) . . ?
C4 C5 C6 119.9(3) . . ?
C1 C6 C5 120.1(3) . . ?
C8 C7 C2 130.0(3) . . ?
C7 C8 N1 129.6(3) . . ?
C7 C8 C9 121.7(3) . . ?
N1 C8 C9 108.7(3) . . ?
O2 C9 O1 122.0(3) . . ?
O2 C9 C8 133.6(3) . . ?
O1 C9 C8 104.5(3) . . ?
N1 C10 O1 116.0(3) . . ?
N1 C10 C11 127.6(3) . . ?
O1 C10 C11 116.5(3) . . ?
C12 C11 C16 119.9(3) . . ?
C12 C11 C10 121.3(3) . . ?
C16 C11 C10 118.8(3) . . ?
C13 C12 C11 120.3(3) . . ?
C14 C13 C12 119.7(3) . . ?
C13 C14 C15 120.3(3) . . ?
C16 C15 C14 120.1(3) . . ?
C15 C16 C11 119.7(3) . . ?
 
loop_
 _geom_torsion_atom_site_label_1
 _geom_torsion_atom_site_label_2
 _geom_torsion_atom_site_label_3
 _geom_torsion_atom_site_label_4
 _geom_torsion
 _geom_torsion_site_symmetry_1
 _geom_torsion_site_symmetry_2
 _geom_torsion_site_symmetry_3
 _geom_torsion_site_symmetry_4
 _geom_torsion_publ_flag
C6 C1 C2 C3 -2.8(4) . . . . ?
Se1 C1 C2 C3 177.2(2) . . . . ?
C6 C1 C2 C7 177.4(3) . . . . ?
Se1 C1 C2 C7 -2.6(4) . . . . ?
C1 C2 C3 C4 1.8(4) . . . . ?
C7 C2 C3 C4 -178.5(3) . . . . ?
C2 C3 C4 C5 0.5(5) . . . . ?
C3 C4 C5 C6 -1.9(5) . . . . ?
C2 C1 C6 C5 1.5(5) . . . . ?
Se1 C1 C6 C5 -178.4(2) . . . . ?
C4 C5 C6 C1 0.8(5) . . . . ?
C1 C2 C7 C8 177.1(3) . . . . ?
C3 C2 C7 C8 -2.7(5) . . . . ?
C2 C7 C8 N1 0.8(6) . . . . ?
C2 C7 C8 C9 -179.1(3) . . . . ?
C10 N1 C8 C7 179.9(3) . . . . ?
C10 N1 C8 C9 -0.2(3) . . . . ?
C10 O1 C9 O2 -179.2(3) . . . . ?
C10 O1 C9 C8 1.3(3) . . . . ?
C7 C8 C9 O2 -0.2(6) . . . . ?
N1 C8 C9 O2 179.8(4) . . . . ?
C7 C8 C9 O1 179.3(3) . . . . ?
N1 C8 C9 O1 -0.7(3) . . . . ?
C8 N1 C10 O1 1.1(4) . . . . ?
C8 N1 C10 C11 -178.1(3) . . . . ?
C9 O1 C10 N1 -1.5(4) . . . . ?
C9 O1 C10 C11 177.7(3) . . . . ?
N1 C10 C11 C12 177.6(3) . . . . ?
O1 C10 C11 C12 -1.6(4) . . . . ?
N1 C10 C11 C16 -1.9(5) . . . . ?
O1 C10 C11 C16 179.0(3) . . . . ?
C16 C11 C12 C13 0.0(5) . . . . ?
C10 C11 C12 C13 -179.5(3) . . . . ?
C11 C12 C13 C14 0.3(5) . . . . ?
C12 C13 C14 C15 0.5(5) . . . . ?
C13 C14 C15 C16 -1.5(5) . . . . ?
C14 C15 C16 C11 1.8(5) . . . . ?
C12 C11 C16 C15 -1.0(5) . . . . ?
C10 C11 C16 C15 178.5(3) . . . . ?
 
_refine_diff_density_max    0.256
_refine_diff_density_min   -0.502
_refine_diff_density_rms    0.060

_shelx_res_file
;
TITL mo_ale277_0ma_a.res in P2(1)2(1)2
    shelx.res
    created by SHELXL-2018/3 at 11:43:50 on 15-Jul-2022
CELL  0.71073  13.7518  19.5095   4.7253   90.000   90.000   90.000
ZERR     2.00   0.0006   0.0010   0.0003    0.000    0.000    0.000
LATT  -1
SYMM  - X, - Y,   Z
SYMM  1/2 - X, 1/2 + Y, - Z
SYMM  1/2 + X, 1/2 - Y, - Z
SFAC  C    H    N    O    SE
UNIT  64 40 4 8 2
MERG   2
TWIN
FMAP   2
PLAN   20
SIZE     0.045   0.087   0.131
ACTA
BOND
CONF
LIST   4
L.S.  10
TEMP  -173.15
WGHT    0.012600    0.693600
BASF   0.02392
FVAR       0.66478
SE1   5    0.000000    0.500000    0.115953    10.50000    0.02713    0.03002 =
         0.01886    0.00000    0.00000    0.00160
O1    4    0.351805    0.689085    0.620342    11.00000    0.02942    0.02207 =
         0.02811    0.00356   -0.00161   -0.00047
O2    4    0.236386    0.698942    0.279709    11.00000    0.03536    0.02809 =
         0.03818    0.00944   -0.00641    0.00106
N1    3    0.326478    0.580013    0.772298    11.00000    0.02708    0.02422 =
         0.02346    0.00171   -0.00064    0.00141
C1    1    0.080494    0.452304    0.391427    11.00000    0.02490    0.02480 =
         0.01878   -0.00033    0.00618    0.00570
C2    1    0.160045    0.484030    0.523960    11.00000    0.02117    0.02271 =
         0.02167   -0.00143    0.00545    0.00429
C3    1    0.211253    0.446343    0.729969    11.00000    0.02264    0.02511 =
         0.02683    0.00153    0.00283    0.00274
AFIX  43
H3    2    0.264211    0.467109    0.826482    11.00000   -1.20000
AFIX   0
C4    1    0.185632    0.379636    0.793804    11.00000    0.02738    0.02735 =
         0.02894    0.00478    0.00494    0.00744
AFIX  43
H4    2    0.220613    0.355102    0.934499    11.00000   -1.20000
AFIX   0
C5    1    0.109182    0.348429    0.653491    11.00000    0.02938    0.02246 =
         0.03154    0.00352    0.00764    0.00338
AFIX  43
H5    2    0.092959    0.302117    0.693864    11.00000   -1.20000
AFIX   0
C6    1    0.056096    0.384969    0.453184    11.00000    0.02771    0.02453 =
         0.02680   -0.00325    0.00380    0.00158
AFIX  43
H6    2    0.003076    0.363758    0.358629    11.00000   -1.20000
AFIX   0
C7    1    0.187869    0.553643    0.450128    11.00000    0.02393    0.02429 =
         0.02446    0.00297    0.00385    0.00312
AFIX  43
H7    2    0.150626    0.573912    0.302926    11.00000   -1.20000
AFIX   0
C8    1    0.258658    0.594057    0.558726    11.00000    0.02646    0.02231 =
         0.02620    0.00228    0.00212    0.00329
C9    1    0.274634    0.664523    0.456112    11.00000    0.02611    0.02466 =
         0.02984    0.00109    0.00057    0.00245
C10   1    0.377829    0.635349    0.796202    11.00000    0.02847    0.02125 =
         0.02264    0.00172    0.00266    0.00584
C11   1    0.459786    0.647135    0.982514    11.00000    0.02625    0.02466 =
         0.02233   -0.00097    0.00261    0.00185
C12   1    0.510516    0.708598    0.978028    11.00000    0.03207    0.02853 =
         0.02606   -0.00035    0.00285   -0.00149
AFIX  43
H12   2    0.491237    0.744022    0.852011    11.00000   -1.20000
AFIX   0
C13   1    0.589181    0.718521    1.156595    11.00000    0.03198    0.03326 =
         0.02925   -0.00325    0.00433   -0.00497
AFIX  43
H13   2    0.623664    0.760709    1.153798    11.00000   -1.20000
AFIX   0
C14   1    0.617276    0.666716    1.338953    11.00000    0.02612    0.04042 =
         0.02971   -0.00402   -0.00049    0.00179
AFIX  43
H14   2    0.670861    0.673545    1.462665    11.00000   -1.20000
AFIX   0
C15   1    0.567563    0.604803    1.342086    11.00000    0.03488    0.03188 =
         0.03222   -0.00133   -0.00488    0.00778
AFIX  43
H15   2    0.588181    0.569018    1.464515    11.00000   -1.20000
AFIX   0
C16   1    0.488061    0.595108    1.167296    11.00000    0.03132    0.02534 =
         0.03124   -0.00033   -0.00033    0.00126
AFIX  43
H16   2    0.452905    0.553215    1.173125    11.00000   -1.20000
AFIX   0
HKLF    4


REM  mo_ale277_0ma_a.res in P2(1)2(1)2
REM wR2 = 0.0598, GooF = S = 1.043, Restrained GooF = 1.043 for all data
REM R1 = 0.0325 for 2756 Fo > 4sig(Fo) and 0.0451 for all 3165 data
REM 178 parameters refined using 0 restraints

END

WGHT      0.0123      0.7135

REM Highest difference peak  0.256,  deepest hole -0.502,  1-sigma level  0.060
Q1    1   0.0111  0.5268 -0.1393  11.00000  0.05    0.26
Q2    1  -0.0342  0.4420  0.0305  11.00000  0.05    0.23
Q3    1   0.0000  0.5000  0.4285  10.50000  0.05    0.23
Q4    1   0.0000  0.5000  0.6602  10.50000  0.05    0.22
Q5    1   0.0467  0.4980 -0.1476  11.00000  0.05    0.21
Q6    1  -0.0322  0.4403  0.1655  11.00000  0.05    0.21
Q7    1   0.1619  0.4796  0.1307  11.00000  0.05    0.21
Q8    1   0.0721  0.5109  0.5377  11.00000  0.05    0.21
Q9    1   0.3515  0.4992  1.1728  11.00000  0.05    0.20
Q10   1   0.1379  0.4721  0.9455  11.00000  0.05    0.20
Q11   1   0.0579  0.4758  0.3119  11.00000  0.05    0.20
Q12   1  -0.0139  0.4570  0.3389  11.00000  0.05    0.20
Q13   1   0.2600  0.4836  0.9142  11.00000  0.05    0.20
Q14   1  -0.0604  0.4696  0.2251  11.00000  0.05    0.19
Q15   1   0.0439  0.5446  0.6777  11.00000  0.05    0.19
Q16   1   0.3019  0.5085  0.7436  11.00000  0.05    0.19
Q17   1   0.3243  0.5417  0.8763  11.00000  0.05    0.19
Q18   1   0.5827  0.7000  1.3221  11.00000  0.05    0.19
Q19   1   0.2594  0.6300  0.5227  11.00000  0.05    0.19
Q20   1   0.1002  0.4950  0.1343  11.00000  0.05    0.19
;
_shelx_res_checksum   54771

_shelx_hkl_file
;
   0   0   1 1141.49   50.69
   0   0   1 1105.79   51.99
   0   0   1 1171.78   50.19
   0   0  -1 1123.89   50.29
   0   0  -1 1111.99   50.19
   0   0  -1 1193.28   52.89
   0   0  -1 1125.79   49.10
   0   0  -1 1101.99   49.50
   0   0  -1 1173.68   50.29
   0   0   1 1075.89   50.19
   0   0   1 1136.29   49.80
   0   0  -2   28.90   11.50
   0   0  -2   21.90    9.90
   0   0   2   36.80   10.90
   0   0  -2   35.70   11.00
   0   0   2   30.30   10.60
   0   0   2    6.90    8.30
   0   0  -2   37.10   12.80
   0   0  -2   34.00   11.40
   0   0   2   31.00   11.50
   0   0   3  246.28   26.90
   0   0  -3  304.07   28.60
   0   0  -3  262.87   28.30
   0   0  -3  211.18   33.20
   0   0  -3  222.08   24.80
   0   0  -3  238.98   25.60
   0   0  -3  224.18   25.70
   0   0   3  250.17   26.60
   0   0  -3  276.97   32.90
   0   0   3  230.38   25.90
   0   0   3  322.17   30.30
   0   0  -4  179.48   29.90
   0   0  -4  158.48   33.20
   0   0   4  109.89   25.90
   0   0  -4  201.28   33.70
   0   0  -4  161.98   28.60
   0   0   4  192.18   34.30
   0   0   5   14.50   20.10
   0   0  -5   -5.40   16.40
   0   0  -5   28.40   23.50
   0   0   5   58.89   24.00
   0   0  -6   15.00   29.40
   0   0   6   -3.00   24.10
   0   0   6   40.30   27.70
   0   0  -6  -45.80   22.80
   0   0  -6   19.80   32.90
  -1   0  -1  130.59   11.90
  -1   0   1  152.68   13.30
  -1   0  -1  139.39   13.20
  -1   0   1  150.48   14.20
  -1   0   1  143.99   13.60
  -1   0  -1  153.58   13.50
  -1   0  -1  169.38   13.90
  -1   0   1  133.49   12.50
  -1   0  -1  124.49   11.80
  -1   0   1  154.18   12.70
  -1   0  -1  138.99   12.20
   1   0   1  129.19   12.50
   1   0  -1  147.69   13.00
   1   0  -1  159.48   13.00
   1   0   1  150.68   13.70
   1   0  -1  144.89   13.80
   1   0   1  154.48   13.20
   1   0  -1  116.59   12.40
   1   0   1  127.79   12.20
   1   0   1  164.08   13.90
   1   0  -1  149.88   10.90
  -1   0  -2  540.15   34.20
  -1   0  -2  590.14   35.80
  -1   0   2  537.15   35.00
  -1   0  -2  522.15   34.80
  -1   0   2  552.04   34.10
  -1   0   2  518.95   34.00
  -1   0   2  449.26   39.10
  -1   0  -2  561.34   33.90
  -1   0  -2  516.05   37.40
  -1   0  -2  522.65   33.70
  -1   0   2  512.15   33.90
  -1   0  -2  548.85   34.60
   1   0  -2  524.55   30.90
   1   0  -2  524.35   35.00
   1   0  -2  527.95   33.60
   1   0   2  511.45   34.10
   1   0   2  543.85   35.30
   1   0  -2  516.45   33.70
   1   0  -2  534.35   37.50
   1   0   2  537.35   34.10
   1   0   2  548.45   35.50
  -1   0   3  912.71   56.99
  -1   0  -3  823.42   54.29
  -1   0   3  947.61   57.29
  -1   0   3  907.21   55.79
  -1   0  -3  928.61   55.59
  -1   0  -3  850.01   61.09
  -1   0  -3  966.30   58.49
  -1   0   3  929.41   57.39
  -1   0  -3  925.21   57.89
  -1   0  -3  922.71   56.19
  -1   0  -3  987.60   55.79
   1   0   3  850.31   54.59
   1   0   3  886.41   56.69
   1   0  -3  917.71   55.79
   1   0  -3  948.51   57.09
   1   0  -3  976.40   62.19
   1   0  -3  904.21   51.29
   1   0   3  992.80   59.29
   1   0  -3  922.91   64.69
   1   0   3  882.81   56.09
   1   0  -3  959.10   57.29
   1   0  -3  885.11   53.99
  -1   0  -4    7.30   13.50
  -1   0  -4  -10.60   11.20
  -1   0   4    0.50   12.10
  -1   0  -4   36.90   23.50
  -1   0   4    8.60   14.70
  -1   0  -4   20.90   13.90
   1   0  -4    7.40   11.90
   1   0  -4  -25.10   10.30
   1   0  -4    7.90   10.50
   1   0  -4    9.80   13.50
   1   0   4    8.60   16.50
   1   0   4  -19.70    9.60
   1   0  -4  -13.10   11.70
  -1   0  -5   30.80   28.00
  -1   0   5   33.80   21.70
  -1   0   5  -10.30   17.70
  -1   0  -5   58.79   23.40
   1   0  -5    8.70   22.60
   1   0  -5  -16.10   18.00
   1   0   5   40.20   22.50
   1   0   5   55.79   26.20
  -1   0   6   24.20   24.80
  -1   0   6   38.50   28.10
  -1   0  -6   31.30   30.40
  -1   0  -6   -7.40   26.20
  -1   0  -6    2.50   24.30
   1   0  -6   15.90   26.70
   1   0   6    8.40   26.70
   1   0   6    6.20   26.90
   1   0  -6  -15.90   30.30
   1   0  -6   31.20   28.50
  -2   0   0  474.95   21.20
  -2   0   0  463.35   21.90
  -2   0   0  475.05   21.00
  -2   0   0  478.95   20.80
   2   0   0  454.05   20.20
   2   0   0  467.35   22.00
   2   0   0  480.05   21.40
  -2   0  -1 5980.10  229.48
  -2   0   1 5994.50  227.68
  -2   0   1 5984.90  229.98
  -2   0   1 5930.51  230.18
  -2   0  -1 6033.40  230.48
  -2   0  -1 5991.00  228.08
  -2   0  -1 5940.91  227.98
  -2   0   1 5992.10  227.78
  -2   0   1 5843.22  227.98
  -2   0  -1 6082.39  229.48
  -2   0  -1 6081.39  230.08
   2   0   1 5925.01  228.08
   2   0   1 5920.11  229.08
   2   0   1 5945.71  228.38
   2   0  -1 6093.29  227.68
   2   0   1 5951.20  228.18
   2   0  -1 5844.42  227.48
   2   0   1 5839.92  229.38
   2   0  -1 5908.01  230.28
   2   0  -1 6056.69  230.58
   2   0  -1 5946.71  227.48
   2   0  -1 6019.60  222.48
  -2   0  -2  419.76   31.30
  -2   0   2  496.45   35.90
  -2   0  -2  507.45   33.80
  -2   0  -2  484.15   36.80
  -2   0   2  460.75   31.30
  -2   0  -2  536.25   33.00
  -2   0   2  441.56   32.00
  -2   0  -2  495.95   34.00
  -2   0   2  460.75   32.20
  -2   0  -2  550.44   34.80
  -2   0  -2  519.75   33.50
  -2   0   2  506.55   33.50
  -2   0  -2  478.05   33.20
   2   0   2  533.35   34.70
   2   0  -2  459.45   27.40
   2   0  -2  523.45   32.70
   2   0  -2  497.45   35.80
   2   0  -2  451.85   31.70
   2   0   2  511.25   33.00
   2   0   2  498.25   33.90
   2   0   2  492.15   33.30
   2   0  -2  458.55   33.40
  -2   0   3    1.40    9.80
  -2   0  -3   11.00    8.30
  -2   0  -3    9.30   11.20
  -2   0   3   -2.30   10.00
  -2   0  -3    7.20    8.00
  -2   0  -3    2.20   11.30
  -2   0  -3    0.80    9.60
  -2   0   3   17.10   10.70
  -2   0  -3    3.00    9.50
  -2   0   3   16.40   13.40
  -2   0  -3    9.60    9.40
   2   0   3   12.60   12.00
   2   0  -3    9.30   11.50
   2   0  -3    7.40   10.00
   2   0  -3   15.50   10.20
   2   0  -3   -1.00    7.80
   2   0  -3   -2.90    6.50
   2   0   3   -5.80    8.80
   2   0   3   17.60   11.00
   2   0   3   17.60   11.30
   2   0  -3  -10.30    8.80
  -2   0  -4  936.11   63.49
  -2   0   4  989.10   68.09
  -2   0  -4  995.30   71.69
  -2   0   4  921.71   67.09
  -2   0  -4 1015.30   66.79
  -2   0  -4 1024.70   68.29
  -2   0  -4 1035.50   74.29
   2   0  -4  895.71   61.89
   2   0  -4  917.91   57.09
   2   0   4  929.81   67.39
   2   0  -4  897.21   70.29
   2   0   4 1035.60   69.99
   2   0  -4 1044.20   69.39
   2   0  -4  941.61   64.69
  -2   0  -5   56.49   28.00
  -2   0   5   30.00   21.50
  -2   0  -5   34.10   25.10
  -2   0  -5   64.49   23.80
  -2   0   5   27.90   23.00
   2   0   5   36.30   25.50
   2   0   5   59.09   25.60
   2   0  -5   89.29   26.30
   2   0  -5   38.10   28.60
   2   0  -5   50.19   25.40
  -2   0  -6   -9.90   26.00
  -2   0  -6   16.20   26.40
  -2   0   6   32.40   26.80
  -2   0  -6   26.70   28.40
   2   0  -6    2.40   27.50
   2   0   6   -3.60   21.30
   2   0  -6  -20.80   26.40
   2   0  -6   93.89   37.30
   2   0   6   22.70   30.90
  -3   0   0    2.00    3.40
  -3   0   0    1.40    4.60
  -3   0   0   -1.50    3.40
  -3   0   0    3.80    4.10
   3   0   0   -4.10    4.10
   3   0   0   -3.40    4.20
   3   0   0    3.80    3.30
  -3   0   1  117.59   13.30
  -3   0   1  119.19   11.50
  -3   0  -1  141.89   13.80
  -3   0  -1  117.99   11.50
  -3   0  -1  118.79   12.00
  -3   0   1  151.58   18.50
  -3   0   1  117.09   12.80
  -3   0  -1  147.49   15.10
  -3   0   1  117.69   11.70
  -3   0  -1  136.19   14.10
  -3   0  -1  130.69   13.70
   3   0  -1  131.59   12.30
   3   0   1  114.19   13.10
   3   0   1  116.49   12.10
   3   0   1  123.49   12.10
   3   0  -1  114.09   13.60
   3   0  -1  112.09   11.70
   3   0  -1  114.49   11.60
   3   0   1   98.29   11.60
   3   0  -1  115.29    6.50
   3   0  -1  123.39    6.10
   3   0   1  138.09   14.30
  -3   0  -2  905.61   52.29
  -3   0   2  961.70   50.59
  -3   0   2  914.31   51.99
  -3   0   2  970.00   51.99
  -3   0  -2  931.21   52.29
  -3   0   2  956.50   51.29
  -3   0  -2  932.61   51.19
  -3   0  -2  962.20   51.09
  -3   0  -2  971.60   53.79
  -3   0   2  991.30   54.99
  -3   0  -2  944.41   53.29
   3   0  -2  953.70   43.50
   3   0   2  962.30   53.39
   3   0   2  939.91   51.99
   3   0   2 1007.90   52.29
   3   0   2  884.31   51.49
   3   0   2  946.71   51.79
   3   0  -2  933.71   50.29
   3   0  -2  955.20   54.79
   3   0  -2  990.10   54.79
   3   0  -2  980.60   51.09
   3   0   2  928.91   51.09
  -3   0   3  586.04   41.50
  -3   0   3  515.95   44.40
  -3   0  -3  476.45   44.60
  -3   0  -3  538.25   42.50
  -3   0   3  589.44   43.40
  -3   0  -3  508.95   39.80
  -3   0  -3  588.34   44.60
  -3   0   3  541.15   41.90
  -3   0   3  556.54   42.80
  -3   0  -3  595.44   42.90
  -3   0  -3  545.05   42.90
  -3   0  -3  600.64   43.20
   3   0  -3  610.04   46.10
   3   0   3  603.24   44.80
   3   0  -3  606.64   35.70
   3   0   3  653.63   45.70
   3   0   3  585.24   42.70
   3   0  -3  594.44   42.40
   3   0   3  590.04   42.80
   3   0  -3  606.24   47.60
   3   0  -3  558.44   41.80
  -3   0   4  174.78   32.70
  -3   0  -4  113.99   27.60
  -3   0  -4  140.09   30.60
  -3   0  -4  162.48   34.70
  -3   0   4  196.88   35.50
  -3   0  -4  149.69   28.60
   3   0  -4  182.28   32.00
   3   0   4  115.99   27.30
   3   0  -4  151.08   24.00
   3   0   4  153.08   33.20
   3   0  -4  135.29   29.80
  -3   0   5   -5.80   16.70
  -3   0   5    5.30   20.70
  -3   0  -5   -0.90   17.40
  -3   0  -5    5.80   21.50
  -3   0  -5   14.20   19.20
   3   0  -5  -24.60   16.20
   3   0  -5   13.20   22.80
   3   0   5    9.70   19.10
   3   0  -5   19.30   19.50
   3   0   5   -1.20   13.30
   3   0  -5   -0.80   19.00
  -3   0   6  125.59   35.80
  -3   0  -6  152.38   37.70
  -3   0  -6   96.99   34.10
  -3   0  -6   59.29   35.80
   3   0  -6  223.88   50.59
   3   0   6  114.39   38.10
   3   0  -6   90.09   35.80
   3   0  -6    1.60   32.00
  -4   0   0 1370.66   57.09
  -4   0   0 1357.66   56.79
  -4   0   0 1343.37   56.39
  -4   0   0 1339.67   58.69
   4   0   0 1314.27   57.19
   4   0   0 1335.27   54.79
   4   0   0 1320.07   58.79
  -4   0   1 2445.16   95.79
  -4   0   1 2410.26  101.19
  -4   0  -1 2254.27  101.29
  -4   0   1 2360.46   97.99
  -4   0  -1 2420.66  100.99
  -4   0  -1 2419.06   98.59
  -4   0   1 2345.27   97.59
  -4   0  -1 2467.15   97.09
  -4   0  -1 2274.17   98.89
   4   0   1 2384.96  100.89
   4   0   1 2344.07  101.19
   4   0   1 2434.66   97.39
   4   0   1 2401.56   97.89
   4   0  -1 2372.06   96.69
   4   0  -1 2326.07   95.19
   4   0  -1 2415.36  100.69
   4   0   1 2318.77   98.29
  -4   0   2  318.37   27.20
  -4   0  -2  396.56   28.40
  -4   0   2  369.86   30.00
  -4   0   2  379.16   27.60
  -4   0   2  321.67   28.90
  -4   0  -2  361.76   29.50
  -4   0  -2  346.57   28.80
  -4   0  -2  350.86   27.40
  -4   0  -2  362.46   29.90
  -4   0   2  352.26   27.20
  -4   0  -2  378.76   30.30
   4   0   2  335.97   27.20
   4   0   2  386.66   29.00
   4   0  -2  418.26   32.20
   4   0  -2  331.27   29.80
   4   0   2  300.57   27.20
   4   0  -2  337.97   19.10
   4   0   2  339.17   26.80
   4   0  -2  363.46   26.80
   4   0   2  402.36   28.90
   4   0   2  328.27   28.30
   4   0  -2  418.26   28.50
  -4   0  -3  257.87   28.10
  -4   0  -3  287.77   41.10
  -4   0   3  208.28   33.10
  -4   0  -3  257.17   34.70
  -4   0  -3  291.07   29.80
  -4   0   3  235.88   25.90
  -4   0  -3  226.08   24.70
  -4   0  -3  280.47   39.20
  -4   0   3  227.98   27.20
  -4   0   3  275.47   29.50
  -4   0  -3  275.67   29.50
  -4   0   3  214.08   30.60
  -4   0  -3  221.18   25.70
   4   0   3  288.87   28.20
   4   0   3  274.67   30.20
   4   0  -3  224.88   25.80
   4   0  -3  275.07   21.10
   4   0  -3  273.27   31.00
   4   0   3  290.17   33.70
   4   0  -3  259.67   27.40
   4   0   3  253.57   33.60
   4   0  -3  306.87   32.90
  -4   0   4   34.40   18.60
  -4   0  -4   34.00   17.80
  -4   0  -4   26.00   17.10
  -4   0  -4   20.30   15.30
  -4   0  -4   24.50   17.20
  -4   0   4   20.60   15.20
   4   0  -4   23.00   18.60
   4   0   4   13.40   14.50
   4   0  -4   28.20   12.70
   4   0  -4    2.50   13.40
   4   0  -4   31.90   20.20
   4   0   4   22.00   15.30
  -4   0   5  209.98   41.90
  -4   0  -5  267.97   49.20
  -4   0   5  184.48   35.60
  -4   0  -5  227.58   41.10
  -4   0  -5  193.48   39.60
   4   0  -5  227.28   40.00
   4   0  -5  173.28   40.80
   4   0   5  185.18   38.10
   4   0  -5  188.48   43.20
   4   0   5  233.98   42.40
  -4   0  -6   19.60   26.70
  -4   0   6   57.19   29.10
  -4   0  -6   -7.60   24.30
  -4   0  -6   43.60   27.80
   4   0   6   50.29   42.50
   4   0  -6  -22.10   27.20
   4   0  -6    7.20   33.30
   4   0  -6   42.90   30.20
  -5   0   0    4.00    5.20
  -5   0   0   -2.00    4.40
  -5   0   0   -4.70    5.10
  -5   0   0    3.90    4.50
   5   0   0   -7.50    3.00
   5   0   0   -5.10    5.00
  -5   0   1  864.61   44.20
  -5   0   1  886.21   41.20
  -5   0  -1  926.11   42.70
  -5   0   1  880.21   44.20
  -5   0  -1  898.41   44.90
  -5   0  -1  881.71   48.40
  -5   0  -1  912.21   46.10
  -5   0  -1  889.61   47.40
  -5   0   1  947.21   48.00
  -5   0  -1  881.91   48.30
   5   0   1  927.81   44.00
   5   0   1  927.21   47.90
   5   0   1  941.01   45.70
   5   0  -1  900.81   47.00
   5   0  -1  889.41   40.70
   5   0  -1  887.71   42.60
   5   0   1  968.10   43.50
  -5   0  -2  286.67   26.70
  -5   0  -2  302.97   28.50
  -5   0   2  298.57   25.10
  -5   0  -2  290.17   24.70
  -5   0  -2  298.47   27.00
  -5   0  -2  283.17   24.50
  -5   0   2  276.67   25.60
  -5   0   2  312.07   25.10
  -5   0   2  327.27   28.30
  -5   0  -2  277.07   26.50
  -5   0   2  280.67   27.30
   5   0  -2  285.77   24.00
   5   0   2  298.27   25.60
   5   0  -2  291.67   27.30
   5   0   2  277.97   26.40
   5   0  -2  304.27   13.90
   5   0   2  245.38   25.40
   5   0  -2  269.97   28.50
   5   0   2  278.67   23.90
   5   0   2  315.57   26.60
   5   0   2  324.67   26.70
   5   0  -2  292.27   13.80
  -5   0   3  536.95   42.00
  -5   0  -3  564.44   47.90
  -5   0  -3  525.85   43.10
  -5   0  -3  514.65   43.50
  -5   0  -3  529.65   43.40
  -5   0   3  516.35   40.70
  -5   0   3  556.54   48.30
  -5   0   3  504.15   39.20
  -5   0  -3  518.85   40.70
  -5   0  -3  588.14   41.90
  -5   0   3  506.55   43.50
   5   0  -3  489.75   28.90
   5   0   3  467.95   40.50
   5   0   3  531.45   45.80
   5   0  -3  476.35   43.30
   5   0   3  568.84   43.40
   5   0   3  527.15   42.20
   5   0  -3  533.35   39.80
   5   0  -3  543.45   40.00
   5   0  -3  495.05   44.00
  -5   0  -4  233.68   41.70
  -5   0   4  200.88   42.50
  -5   0  -4  209.48   33.60
  -5   0   4  221.78   35.80
  -5   0   4  203.88   33.60
  -5   0  -4  198.08   35.50
  -5   0   4  195.58   34.90
  -5   0  -4  294.17   40.60
   5   0  -4  182.58   30.70
   5   0   4  208.08   35.70
   5   0   4  205.48   35.40
   5   0  -4  211.88   39.80
   5   0  -4  210.18   22.10
   5   0  -4  224.38   40.00
  -5   0  -5   88.39   30.10
  -5   0   5   89.59   27.50
  -5   0   5   79.49   26.30
  -5   0  -5   73.89   31.30
  -5   0  -5   94.69   33.10
   5   0  -5   70.79   20.10
   5   0   5   44.00   24.50
   5   0  -5   88.39   27.00
   5   0   5   33.70   22.50
   5   0  -5   52.09   32.00
   5   0  -5   75.19   30.30
  -5   0  -6  105.39   37.60
  -5   0   6   92.69   35.20
  -5   0  -6   57.39   31.30
  -5   0  -6  115.09   43.80
   5   0  -6  129.29   49.50
   5   0  -6   56.59   36.50
   5   0  -6  125.89   37.30
   5   0   6   84.19   29.60
  -6   0   0  746.63   38.10
  -6   0   0  760.72   38.40
  -6   0   0  750.82   38.20
  -6   0   0  773.52   40.70
   6   0   0  716.63   34.80
   6   0   0  757.92   38.40
   6   0   0  765.52   40.80
  -6   0  -1 1575.44   75.29
  -6   0   1 1552.84   71.39
  -6   0  -1 1595.04   72.29
  -6   0   1 1605.04   75.39
  -6   0   1 1547.65   71.39
  -6   0  -1 1633.34   78.29
  -6   0   1 1596.64   61.29
  -6   0  -1 1586.34   73.89
  -6   0  -1 1566.74   67.99
  -6   0   1 1637.74   66.59
  -6   0  -1 1695.63   77.49
   6   0   1 1653.03   75.69
   6   0  -1 1598.34   65.89
   6   0   1 1529.85   69.49
   6   0   1 1566.24   68.29
   6   0  -1 1586.24   74.39
   6   0   1 1592.54   72.29
   6   0  -1 1635.64   68.89
  -6   0  -2   42.90   15.10
  -6   0  -2   62.29   14.00
  -6   0   2   53.89   17.00
  -6   0  -2   46.90   14.70
  -6   0  -2   43.10   14.70
  -6   0   2   40.50   12.60
  -6   0   2   48.80   13.40
  -6   0   2   32.70   11.30
  -6   0   2   50.19   15.20
  -6   0  -2   58.69   16.50
  -6   0  -2   43.70   12.10
   6   0   2   27.10   10.60
   6   0  -2   37.70   10.40
   6   0   2   27.80   11.40
   6   0   2   36.50   13.30
   6   0  -2   47.20   15.70
   6   0   2   32.90   12.80
   6   0  -2   51.49   13.30
   6   0   2   45.90   13.80
  -6   0   3  399.16   38.60
  -6   0   3  332.07   32.10
  -6   0  -3  385.76   37.80
  -6   0  -3  436.26   39.70
  -6   0   3  305.67   35.20
  -6   0  -3  339.47   32.90
  -6   0  -3  428.26   39.00
  -6   0  -3  427.76   39.30
  -6   0   3  447.66   36.90
   6   0   3  448.36   38.20
   6   0  -3  376.66   20.80
   6   0  -3  432.46   40.70
   6   0   3  417.76   37.50
   6   0  -3  422.26   21.20
   6   0  -3  341.07   31.90
   6   0   3  437.46   37.70
   6   0   3  424.96   37.50
   6   0  -3  373.06   34.00
  -6   0   4   86.09   21.20
  -6   0  -4   69.89   23.60
  -6   0   4   77.49   23.40
  -6   0  -4   79.49   24.30
  -6   0   4   48.50   20.40
  -6   0  -4   90.09   25.20
  -6   0  -4   62.39   25.80
  -6   0  -4   50.39   19.30
   6   0   4   82.89   24.60
   6   0  -4   58.19   24.10
   6   0   4   86.79   24.60
   6   0  -4   13.10   19.30
   6   0  -4   36.50   18.30
  -6   0  -5   32.70   26.70
  -6   0  -5   68.59   28.30
  -6   0  -5    6.90   19.60
  -6   0   5   21.00   21.50
  -6   0  -5   48.60   31.50
  -6   0   5   31.80   21.80
   6   0  -5    7.40   18.50
   6   0  -5   50.09   16.40
   6   0  -5   30.90   28.30
   6   0   5   48.70   25.00
   6   0  -5   12.30   25.50
   6   0   5   56.59   24.00
  -7   0   0   10.80    6.60
  -7   0   0   -0.90    5.40
  -7   0   0   -9.50    5.30
  -7   0   0   -6.30    5.50
   7   0   0   -3.70    6.50
   7   0   0   -3.30    3.60
   7   0   0    2.20    4.90
  -7   0   1 1063.99   54.89
  -7   0  -1 1028.40   54.49
  -7   0   1  952.70   42.90
  -7   0   1  977.60   49.99
  -7   0   1  964.30   40.50
  -7   0  -1  969.90   52.39
  -7   0  -1 1063.29   57.69
  -7   0   1  995.90   50.29
  -7   0  -1  944.71   54.29
  -7   0  -1  951.10   50.29
  -7   0  -1  977.50   45.30
   7   0  -1  953.50   46.00
   7   0  -1  929.31   53.29
   7   0   1  976.70   50.49
   7   0  -1  976.20   42.70
   7   0   1  978.30   47.80
   7   0   1 1078.39   54.79
   7   0  -1 1006.60   53.29
   7   0   1  996.40   45.70
  -7   0  -2  630.84   44.20
  -7   0   2  619.54   41.70
  -7   0  -2  656.83   42.00
  -7   0   2  684.33   42.00
  -7   0  -2  624.54   45.10
  -7   0   2  589.24   46.40
  -7   0  -2  604.34   43.80
  -7   0   2  679.93   45.80
  -7   0  -2  647.94   39.50
  -7   0   2  639.74   38.80
  -7   0  -2  644.04   46.90
   7   0  -2  618.74   39.60
   7   0   2  650.53   41.80
   7   0   2  654.33   45.00
   7   0   2  653.53   40.50
   7   0  -2  651.83   37.80
   7   0   2  645.74   42.00
   7   0  -2  659.53   44.60
   7   0   2  620.54   44.00
   7   0   2  596.94   38.70
  -7   0   3  139.89   26.40
  -7   0   3  134.69   25.70
  -7   0   3  170.28   30.20
  -7   0  -3  161.88   30.00
  -7   0  -3  214.48   33.20
  -7   0  -3  110.59   25.00
  -7   0   3  144.29   24.40
  -7   0  -3  156.08   28.70
  -7   0   3  179.18   28.70
   7   0   3  157.78   28.10
   7   0  -3  146.79   24.10
   7   0   3  207.98   31.30
   7   0   3  163.38   27.50
   7   0  -3  164.88   25.90
   7   0  -3  161.18   30.00
  -7   0  -4   34.90   16.20
  -7   0  -4   36.90   21.00
  -7   0   4   42.50   20.90
  -7   0   4   30.60   16.90
  -7   0  -4   48.00   22.60
  -7   0   4   13.00   14.90
  -7   0  -4   45.50   20.70
   7   0  -4   39.80    8.20
   7   0   4   37.80   19.30
   7   0   4   13.40   17.60
   7   0  -4   55.69   19.40
   7   0  -4   36.70    8.20
   7   0  -4   21.10   17.90
  -7   0  -5   71.89   28.00
  -7   0   5   54.79   25.40
  -7   0   5   55.69   26.40
  -7   0  -5   29.90   20.80
  -7   0  -5   62.39   25.60
  -7   0  -5   36.40   25.90
   7   0   5   50.19   27.50
   7   0  -5   52.09   24.70
   7   0  -5   43.20   12.30
   7   0   5   14.70   20.30
   7   0  -5   26.70   29.40
  -8   0   0  973.60   51.49
  -8   0   0  911.71   47.70
  -8   0   0  940.21   48.40
  -8   0   0  913.31   47.70
   8   0   0  963.80   50.89
   8   0   0  889.71   46.60
   8   0   0  860.51   41.70
  -8   0  -1  596.14   41.00
  -8   0   1  561.24   28.10
  -8   0   1  627.64   40.80
  -8   0   1  591.54   36.80
  -8   0  -1  649.24   31.50
  -8   0  -1  666.33   40.70
  -8   0  -1  621.64   41.40
  -8   0   1  617.64   37.70
  -8   0  -1  617.24   38.20
  -8   0  -1  639.74   44.90
   8   0  -1  685.93   37.70
   8   0  -1  628.94   40.70
   8   0  -1  586.14   32.20
   8   0  -1  626.74   28.20
   8   0   1  649.74   41.30
  -8   0   2    7.10   10.30
  -8   0  -2   16.40    9.80
  -8   0  -2   11.90   12.90
  -8   0   2   16.60    9.40
  -8   0   2    3.60    7.70
  -8   0  -2    6.00   11.70
  -8   0   2  -22.50   10.60
  -8   0  -2   12.00    9.70
  -8   0  -2   20.30   11.00
  -8   0  -2    2.60    9.90
   8   0   2   10.20    9.50
   8   0   2   12.70    9.20
   8   0   2   13.50   11.30
   8   0  -2   -3.20    6.40
   8   0   2    1.70    9.50
   8   0  -2   18.90   11.50
   8   0   2   -3.40    7.50
  -8   0  -3   15.20   11.00
  -8   0  -3   30.20   18.70
  -8   0   3   17.90   13.20
  -8   0   3   13.70   11.00
  -8   0  -3   34.20   17.60
  -8   0   3   39.20   17.70
  -8   0  -3   28.60   13.30
  -8   0   3   24.70   13.60
  -8   0  -3   26.10   17.90
   8   0   3   10.30   11.40
   8   0  -3   25.60   13.40
   8   0   3   45.50   16.90
   8   0   3   13.30   13.70
   8   0  -3   18.20   14.30
   8   0   3    5.40   21.80
   8   0  -3   29.90   17.90
   8   0   3   50.19   16.90
  -8   0   4  267.17   40.10
  -8   0   4  280.57   51.19
  -8   0   4  263.67   38.80
  -8   0  -4  352.26   38.00
  -8   0  -4  272.97   51.79
  -8   0  -4  333.97   39.70
  -8   0  -4  376.16   43.60
  -8   0   4  332.07   36.20
  -8   0  -4  406.96   57.89
   8   0  -4  329.17   38.40
   8   0   4  357.06   47.20
   8   0  -4  258.47   44.50
   8   0   4  227.68   38.20
  -8   0  -5   83.59   33.50
  -8   0   5  112.89   32.00
  -8   0  -5   87.09   31.00
  -8   0  -5  121.69   34.40
  -8   0  -5  172.08   40.80
  -8   0   5   97.19   29.50
   8   0  -5   65.59   37.70
   8   0  -5  117.09   30.90
   8   0   5  109.59   32.80
   8   0   5  114.29   31.90
  -9   0   0    6.70    7.80
  -9   0   0   -4.00    6.20
  -9   0   0   -6.30    5.70
  -9   0   0    5.30    7.50
   9   0   0    2.50    6.40
   9   0   0    5.90    5.00
   9   0   0   -2.60    8.30
  -9   0   1   12.10    5.40
  -9   0  -1   21.70   11.10
  -9   0  -1   19.10   12.50
  -9   0   1   -0.50    7.80
  -9   0   1   12.20    8.80
  -9   0  -1   14.80    5.60
  -9   0  -1   24.60   11.50
  -9   0  -1    5.10    8.30
  -9   0  -1   16.70   11.90
  -9   0   1    3.20    8.60
   9   0  -1    8.90    6.10
   9   0  -1   -7.40    8.00
   9   0  -1   -0.30    6.90
   9   0   1   11.60    9.10
  -9   0  -2  771.52   52.09
  -9   0  -2  764.62   54.49
  -9   0   2  752.52   42.10
  -9   0  -2  721.83   43.50
  -9   0  -2  773.82   55.79
  -9   0   2  752.52   48.10
  -9   0  -2  781.52   48.90
  -9   0   2  741.33   47.70
  -9   0   2  815.92   53.69
  -9   0   2  718.23   55.59
  -9   0  -2  815.32   53.29
   9   0   2  748.83   48.60
   9   0   2  748.33   44.20
   9   0   2  726.63   44.60
   9   0   2  741.03   51.39
   9   0  -2  772.12   41.60
   9   0  -2  725.93   50.99
   9   0   2  764.82   47.40
  -9   0  -3  126.19   24.00
  -9   0  -3  142.79   28.90
  -9   0  -3  157.88   32.50
  -9   0   3   97.79   22.30
  -9   0  -3  126.69   24.80
  -9   0   3   88.79   19.90
  -9   0   3   75.39   22.50
  -9   0   3  119.49   22.80
  -9   0  -3  155.48   30.30
   9   0  -3   83.59   22.30
   9   0   3  105.19   24.10
   9   0  -3   64.09   21.80
   9   0  -3  128.79   21.90
   9   0   3  101.89   25.10
   9   0   3  116.89   21.20
   9   0   3  121.99   24.90
   9   0   3  134.99   25.70
  -9   0   4   25.90   17.20
  -9   0  -4   -0.30   15.80
  -9   0   4  -14.70   19.40
  -9   0  -4   26.40   19.20
  -9   0  -4   17.90   19.90
  -9   0   4   33.00   19.80
  -9   0  -4   34.70   18.70
  -9   0  -4   23.20   19.80
   9   0   4   32.00   19.70
   9   0  -4   20.80   21.10
   9   0   4   20.20   16.70
   9   0  -4   47.30   18.80
  -9   0  -5   26.10   22.10
  -9   0  -5   37.80   26.00
  -9   0  -5  -12.90   21.30
  -9   0   5   17.10   24.60
  -9   0   5   -6.10   21.40
   9   0  -5  -14.00   23.80
   9   0   5   30.90   23.30
   9   0   5   46.70   27.10
   9   0  -5   15.40   23.70
 -10   0   0  355.46   29.90
 -10   0   0  386.26   29.60
 -10   0   0  402.76   32.70
 -10   0   0  361.26   28.80
  10   0   0  362.26   31.10
  10   0   0  420.46   22.80
  10   0   0  435.36   29.60
 -10   0  -1  745.43   45.80
 -10   0  -1  758.92   33.80
 -10   0  -1  693.03   48.70
 -10   0  -1  696.43   51.79
 -10   0   1  783.22   49.40
 -10   0  -1  740.13   48.70
 -10   0   1  739.53   44.90
 -10   0   1  701.93   35.20
 -10   0  -1  713.13   52.59
 -10   0   1  805.32   46.50
  10   0  -1  769.22   48.90
  10   0   1  762.32   49.30
  10   0  -1  674.33   42.30
  10   0  -1  745.73   35.80
 -10   0  -2   79.79   20.40
 -10   0  -2   50.29   15.00
 -10   0   2   44.80   16.70
 -10   0   2   43.70   11.30
 -10   0   2   65.29   19.60
 -10   0  -2   69.69   15.10
 -10   0  -2   58.09   20.80
 -10   0   2   57.09   15.50
 -10   0  -2   61.99   18.80
  10   0   2   74.49   19.00
  10   0   2   79.39   16.10
  10   0  -2   54.19   16.60
  10   0  -2   79.19   16.80
  10   0   2   77.89   16.20
  10   0   2   90.39   18.00
 -10   0  -3  126.09   29.70
 -10   0   3  207.08   32.30
 -10   0   3   91.89   20.10
 -10   0  -3   68.49   24.70
 -10   0   3  105.89   24.40
 -10   0  -3  127.09   25.40
 -10   0  -3  119.59   27.00
 -10   0  -3  149.59   26.40
 -10   0   3   98.29   20.90
  10   0   3  143.59   28.70
  10   0   3  142.19   26.00
  10   0  -3  131.49   22.20
  10   0   3  151.18   30.50
  10   0  -3  107.29   28.00
  10   0  -3  100.39   21.40
  10   0   3  118.79   26.20
  10   0   3  109.59   22.50
 -10   0  -4  229.08   37.00
 -10   0   4  226.08   35.00
 -10   0  -4  259.17   46.00
 -10   0   4  243.28   41.90
 -10   0   4  244.38   36.50
 -10   0  -4  196.98   39.50
 -10   0   4  198.68   48.90
 -10   0  -4  235.18   43.80
  10   0   4  212.28   36.20
  10   0  -4  251.97   45.70
  10   0  -4  226.88   36.10
  10   0   4  278.57   39.50
 -10   0  -5   26.80   27.20
 -10   0   5   18.60   22.20
 -10   0  -5   88.09   29.40
 -10   0   5   50.49   25.40
  10   0   5   58.99   25.50
  10   0   5   18.00   24.10
  10   0  -5    6.60   25.00
  10   0  -5  105.59   35.60
 -11   0   0    5.70    8.40
 -11   0   0    0.50    8.90
 -11   0   0   -5.50    6.90
  11   0   0   -8.60    8.70
  11   0   0    8.80    8.00
  11   0   0    2.80    4.70
 -11   0   1   12.90    6.80
 -11   0  -1   17.20   12.70
 -11   0  -1   -6.80   11.70
 -11   0   1   30.60   12.90
 -11   0  -1   16.30   10.40
 -11   0  -1   23.10   12.30
 -11   0   1   31.10   13.40
 -11   0  -1   19.20    4.30
 -11   0   1   20.00   10.90
  11   0   1   19.20    9.20
  11   0  -1   10.00   12.00
  11   0   1    9.40   11.70
  11   0  -1    2.90    8.60
 -11   0  -2  174.88   26.90
 -11   0  -2  164.68   29.90
 -11   0  -2  156.88   27.90
 -11   0   2  163.88   25.00
 -11   0   2  176.38   27.60
 -11   0   2  188.28   34.50
 -11   0  -2  163.98   19.30
 -11   0  -2  154.38   31.90
  11   0  -2  176.18   16.60
  11   0  -2  153.28   24.40
  11   0   2  163.68   28.60
  11   0  -2  206.78   30.60
  11   0   2  169.28   19.70
 -11   0  -3  157.38   28.20
 -11   0  -3  196.98   32.10
 -11   0   3  197.28   31.50
 -11   0  -3  236.08   40.70
 -11   0  -3  205.88   37.00
 -11   0   3  188.78   30.10
 -11   0   3  173.58   33.80
 -11   0  -3  198.18   38.70
 -11   0   3  224.18   33.30
  11   0  -3  189.68   32.90
  11   0   3  168.08   27.50
  11   0  -3  193.58   23.30
  11   0   3  192.58   32.40
  11   0   3  202.88   35.00
  11   0   3  163.58   25.30
 -11   0   4   37.30   29.80
 -11   0  -4   27.40   22.70
 -11   0   4   19.80   18.50
 -11   0   4   -8.30   16.30
 -11   0  -4   40.10   25.20
 -11   0  -4  -10.40   17.40
 -11   0   4   25.60   17.00
 -11   0  -4   22.30   18.60
  11   0   4   10.50   18.70
  11   0  -4    9.50   16.30
  11   0   4   12.80   16.90
  11   0  -4   21.20   22.40
 -11   0   5   -8.40   20.60
 -11   0  -5    6.50   21.10
 -11   0  -5  -35.40   16.00
 -11   0   5    7.60   20.90
 -11   0  -5   14.40   24.10
  11   0   5  -14.90   20.20
  11   0  -5   22.30   33.80
  11   0   5  -17.20   22.80
 -12   0   0  663.63   43.00
 -12   0   0  639.34   45.10
 -12   0   0  636.24   47.30
 -12   0   0  679.13   45.90
  12   0   0  670.03   46.90
  12   0   0  642.94   41.90
 -12   0  -1  105.89   23.80
 -12   0   1   80.29   18.40
 -12   0  -1   57.29   18.20
 -12   0  -1   49.00   18.90
 -12   0   1   77.49   18.80
 -12   0   1   62.89   11.00
 -12   0  -1   70.79   17.90
 -12   0  -1   83.39   25.00
  12   0   1   75.69   16.40
  12   0  -1   31.90   13.20
  12   0  -1   70.99   18.30
  12   0   1   68.59   11.10
  12   0   1   56.39   11.60
  12   0   1   73.69   18.60
 -12   0  -2   14.10   15.20
 -12   0   2   33.20   15.90
 -12   0  -2    8.70   11.30
 -12   0   2    5.40   11.10
 -12   0  -2   14.00   12.80
 -12   0  -2    2.70    7.90
 -12   0  -2    4.40   12.70
  12   0   2   29.30   16.10
  12   0  -2   14.40   11.30
  12   0  -2   22.90    6.80
  12   0   2   13.50   12.70
  12   0   2   -1.40    9.40
  12   0   2   13.60   11.90
  12   0  -2   13.10   14.40
 -12   0  -3  200.78   41.70
 -12   0  -3  216.98   40.10
 -12   0  -3  215.38   35.80
 -12   0  -3  166.08   26.80
 -12   0   3  175.88   31.20
 -12   0   3  164.58   27.10
 -12   0   3  199.78   36.10
 -12   0  -3  189.78   30.80
  12   0  -3  162.08   33.40
  12   0   3  187.18   33.80
  12   0   3  129.29   26.10
  12   0   3  208.58   34.80
  12   0  -3  141.49   25.80
  12   0   3  171.68   39.40
  12   0  -3  217.28   25.20
 -12   0  -4  195.08   38.10
 -12   0   4  129.79   27.80
 -12   0  -4  186.78   39.60
 -12   0   4  120.69   43.50
 -12   0  -4  112.69   34.80
 -12   0  -4  187.68   44.20
 -12   0   4  149.49   30.90
 -12   0   4  166.28   37.20
  12   0   4  222.48   36.90
  12   0  -4  171.48   35.50
  12   0   4  112.39   28.30
  12   0  -4  113.39   26.60
 -13   0   0    8.20   11.10
 -13   0   0   25.40   13.60
 -13   0   0   16.80   12.00
  13   0   0   -7.60    7.20
 -13   0  -1  241.58   38.10
 -13   0   1  248.58   34.80
 -13   0  -1  237.68   28.10
 -13   0   1  286.07   28.90
 -13   0  -1  225.68   39.40
 -13   0   1  200.48   20.50
 -13   0  -1  228.78   34.10
 -13   0  -1  286.67   39.00
 -13   0   1  339.47   32.80
  13   0  -1  272.97   30.70
  13   0   1  267.67   28.30
  13   0  -1  265.47   26.60
  13   0   1  290.87   17.40
  13   0   1  272.17   16.60
  13   0   1  284.97   31.90
 -13   0  -2   18.30   16.90
 -13   0   2   22.40   14.30
 -13   0  -2   55.29   11.70
 -13   0  -2   12.90   17.10
 -13   0   2   -6.70   11.50
 -13   0  -2   -3.00   12.50
 -13   0  -2    6.30   15.10
  13   0  -2   14.20   12.60
  13   0   2   19.90   14.60
  13   0   2   16.60   11.60
  13   0   2   24.90   12.30
  13   0  -2   31.00   19.30
 -13   0  -3   73.29   26.80
 -13   0   3   62.29   20.30
 -13   0  -3   78.69   23.20
 -13   0  -3   74.69   25.80
 -13   0  -3   60.69   20.40
 -13   0   3   47.80   24.00
  13   0  -3   52.49   23.80
  13   0  -3  107.69   18.10
  13   0   3   99.99   27.20
  13   0  -3   72.59   22.70
  13   0   3   61.79   23.40
 -13   0  -4   84.19   31.70
 -13   0  -4   59.79   29.40
 -13   0   4   83.19   26.70
 -13   0  -4    9.60   23.50
  13   0   4   80.39   24.30
  13   0  -4   66.99   30.10
 -14   0   0  102.79   22.90
 -14   0   0  115.59   25.30
 -14   0   0  167.98   24.60
 -14   0   0  173.38   25.70
 -14   0   0   97.19   25.70
  14   0   0  137.69   25.70
  14   0   0  114.39   20.40
 -14   0  -1   47.10   17.30
 -14   0   1   69.99   20.80
 -14   0   1   82.89   21.00
 -14   0  -1   62.19   20.20
 -14   0   1   32.30   14.90
 -14   0  -1   73.79   22.20
 -14   0  -1   39.90   20.80
  14   0  -1   53.59   18.70
  14   0  -1   48.30   15.00
  14   0   1   32.90   14.00
  14   0   1   15.60   14.50
 -14   0  -2    1.70    7.30
 -14   0  -2  -11.60   15.00
 -14   0  -2  -23.30   12.30
 -14   0   2   20.50   15.40
 -14   0  -2    3.60   14.70
 -14   0   2   15.00   17.50
 -14   0  -2   12.90   17.50
 -14   0   2    6.40   13.50
  14   0  -2   25.30   17.40
  14   0   2    0.00   10.20
  14   0   2    8.80   15.80
  14   0   2   32.70   19.80
  14   0   2    9.90    9.50
  14   0  -2   14.60   13.60
 -14   0   3   21.60   14.90
 -14   0  -3  -23.70   23.70
 -14   0  -3   14.30   21.10
 -14   0  -3    3.50   17.50
 -14   0   3   45.30   21.90
 -14   0   3   -1.00   16.70
 -14   0  -3   -8.40   16.10
  14   0   3   21.20   16.50
  14   0  -3   21.90   17.60
  14   0   3   12.70   19.30
  14   0   3   20.90   19.20
  14   0  -3   40.60   14.00
  14   0   3   25.20   14.30
  14   0  -3   -6.70   21.10
 -14   0  -4   90.59   31.60
 -14   0  -4  187.78   46.90
 -14   0   4  161.98   36.50
 -14   0  -4  161.78   44.10
  14   0  -4  164.38   40.40
  14   0   4  103.89   26.70
 -15   0   0  -25.30    9.20
 -15   0   0   -5.30   14.40
 -15   0   0   -6.40   11.00
 -15   0   0    5.50   14.80
  15   0   0  -11.60   12.00
  15   0   0    0.90    9.50
 -15   0   1   21.90   16.90
 -15   0  -1    3.30   15.10
 -15   0   1   -5.90   12.30
 -15   0  -1   11.60   16.10
 -15   0   1   31.10   16.30
 -15   0  -1   15.00   16.20
  15   0   1   10.30   15.20
  15   0   1   32.00   14.70
  15   0  -1    8.40   14.30
 -15   0  -2   98.89   26.70
 -15   0  -2   52.39   19.10
 -15   0   2   46.50   22.30
 -15   0  -2   77.99   26.90
 -15   0   2   52.39   19.00
 -15   0   2   77.09   24.30
 -15   0  -2   94.19   29.80
  15   0  -2   87.79   24.40
  15   0   2   75.19   24.40
  15   0   2  107.09   24.80
  15   0  -2   54.39   18.70
 -15   0  -3  169.08   39.50
 -15   0   3  175.68   34.70
 -15   0  -3  136.49   34.70
  15   0  -3  136.29   36.20
  15   0   3  141.39   34.50
  15   0   3  137.99   25.40
  15   0   3  138.49   36.50
 -16   0   0  162.18   30.30
 -16   0   0  215.78   39.70
 -16   0   0  174.68   28.50
 -16   0   0  184.98   27.80
  16   0   0  164.48   29.50
  16   0   0  159.98   30.70
 -16   0   1   78.99   20.10
 -16   0  -1   45.90   23.80
 -16   0   1   51.59   21.80
 -16   0  -1   45.80   23.60
 -16   0   1   50.59   19.30
 -16   0  -1    7.90   16.20
  16   0   1   19.10   19.70
  16   0   1    2.70   16.20
  16   0  -1   40.50   21.10
  16   0  -1   23.90   17.30
 -16   0   2  -13.00   14.70
 -16   0  -2    5.80   18.40
 -16   0   2   19.60   18.80
 -16   0  -2   14.50   17.30
 -16   0  -2  -10.90   15.90
  16   0  -2   14.50   21.20
  16   0   2    1.50   19.30
  16   0   2  -33.50   18.00
 -16   0  -3   16.10   25.70
 -16   0   3   26.50   22.20
 -16   0  -3   52.89   28.10
  16   0   3   42.60   32.20
 -17   0   0   10.10   22.60
 -17   0   0   -9.10   13.60
  17   0   0  -38.70   14.70
  17   0   0  -27.00   22.00
 -17   0  -1   28.00   20.40
 -17   0   1   53.89   20.10
 -17   0  -1   44.30   19.60
 -17   0  -1  112.99   33.80
 -17   0   1   96.39   24.40
  17   0  -1   78.69   23.80
  17   0   1   17.80   22.60
 -17   0  -2  177.58   37.80
 -17   0   2  178.58   33.30
 -17   0  -2  158.98   39.00
  17   0   2  143.89   34.80
 -18   0   0  103.99   30.30
 -18   0   0   18.20   26.10
 -18   0  -1  -15.50   22.20
 -18   0   1   20.80   18.10
 -18   0  -1  -13.60   18.40
   0   1  -6  172.68   43.90
   0  -1   6  156.28   39.40
   0   1  -6  215.38   46.20
   0   1  -6  169.98   47.20
   0  -1   6  204.58   51.59
   0  -1   5  168.28   36.00
   0   1  -5  224.18   41.30
   0  -1   5  275.17   46.00
   0   1  -5  212.58   44.80
   0   1  -5  213.78   38.80
   0  -1   4  -20.10   11.40
   0   1  -4   20.40   17.40
   0   1  -4   13.80   15.90
   0   1  -4    1.60   11.60
   0   1  -4   15.30   15.00
   0  -1   4   20.60   16.80
   0   1  -4    7.20   11.00
   0  -1   4   20.90   15.80
   0  -1   3 1358.06   73.09
   0   1  -3 1394.86   76.09
   0   1  -3 1452.35   75.99
   0   1  -3 1335.57   72.59
   0  -1   3 1438.06   76.49
   0  -1   3 1363.66   75.09
   0   1  -3 1371.46   74.39
   0   1  -3 1495.55   72.99
   0  -1   3 1372.16   76.09
   0   1  -3 1307.07   74.69
   0   1  -3 1428.86   81.59
   0  -1   2  247.38   22.80
   0   1  -2  222.28   20.60
   0   1  -2  241.98   21.70
   0  -1   2  263.47   21.60
   0   1  -2  274.57   23.20
   0   1  -2  247.28   21.60
   0   1  -2  230.28   21.00
   0  -1   2  242.18   21.60
   0  -1   2  228.78   22.30
   0   1  -2  233.88   24.00
   0   1  -1  232.18   16.50
   0  -1   1  233.38   15.60
   0   1  -1  195.88   15.50
   0  -1   1  243.08   17.10
   0   1  -1  224.08   15.40
   0  -1   1  214.98   15.60
   0   1  -1  223.28   15.50
   0  -1   1  236.08   16.20
   0   1  -1  225.68   15.20
   0   1  -1  221.58   17.20
   0  -1   1  214.08   15.40
   0  -1   1  234.68   15.30
   0  -1  -1  228.68   16.10
   0   1   1  232.08   15.90
   0  -1  -1  225.18   18.00
   0  -1  -1  212.48   16.00
   0   1   1  216.88   16.60
   0  -1  -1  229.28   16.50
   0  -1  -1  236.08   16.80
   0   1   1  222.28   16.40
   0   1   1  251.47   18.40
   0   1   1  225.68   16.00
   0   1   2  258.87   25.30
   0  -1  -2  268.97   24.50
   0  -1  -2  226.58   21.90
   0   1   2  282.97   23.10
   0   1   2  273.67   23.40
   0  -1  -2  243.98   22.20
   0   1   2  249.38   22.40
   0   1   2  239.58   22.20
   0  -1  -2  313.97   27.30
   0  -1  -2  262.27   23.90
   0   1   2  269.87   23.20
   0   1   3 1431.76   76.59
   0  -1  -3 1406.06   75.39
   0  -1  -3 1456.65   77.19
   0   1   3 1360.16   74.89
   0  -1  -3 1337.77   71.69
   0  -1  -3 1426.66   75.89
   0   1   3 1377.56   74.99
   0   1   3 1403.16   77.09
   0  -1  -3 1403.16   74.39
   0  -1  -3 1365.86   76.49
   0  -1  -4   24.50   16.30
   0   1   4   25.50   17.70
   0   1   4   30.80   19.90
   0  -1  -4   17.30   19.00
   0  -1  -4   14.10   12.40
   0  -1  -4   20.20   15.20
   0  -1  -4    6.40   15.40
   0   1   5  218.48   40.60
   0  -1  -5  250.67   42.10
   0  -1  -5  221.28   52.99
   0  -1  -5  128.69   34.60
   0   1   5  191.68   37.30
   0   1   6  191.58   42.30
   0   1   6  208.58   43.90
   0  -1  -6  119.59   39.50
   0  -1  -6  223.58   51.69
  -1  -1   6   71.69   33.00
  -1  -1   6   96.09   35.70
  -1   1  -6   24.10   30.50
  -1   1  -6   58.69   30.10
  -1   1  -6   78.89   38.50
   1  -1   6   41.70   27.00
   1  -1   6   83.89   29.40
   1   1  -6  134.89   39.70
   1   1  -6   55.89   35.00
   1   1  -6   41.70   30.60
  -1   1  -5  305.07   47.10
  -1  -1   5  313.97   47.70
  -1  -1   5  347.37   52.19
  -1   1  -5  297.67   51.19
  -1   1  -5  328.07   55.79
   1   1  -5  262.57   43.30
   1  -1   5  337.07   50.59
   1   1  -5  310.27   51.59
   1  -1   5  261.37   44.40
   1   1  -5  306.07   47.70
  -1   1  -4  469.55   42.30
  -1  -1   4  455.55   44.30
  -1   1  -4  455.65   39.90
  -1   1  -4  363.76   38.50
  -1  -1   4  384.96   38.20
  -1  -1   4  349.47   38.70
  -1   1  -4  361.66   42.30
  -1   1  -4  346.27   34.80
   1  -1   4  323.87   37.00
   1   1  -4  333.37   38.20
   1   1  -4  399.56   39.20
   1  -1   4  344.37   36.60
   1   1  -4  334.87   47.70
   1  -1   4  351.46   39.10
   1   1  -4  406.76   34.90
   1   1  -4  362.76   36.70
  -1   1  -3  422.36   35.20
  -1   1  -3  309.57   31.60
  -1  -1   3  350.46   31.80
  -1  -1   3  359.66   33.90
  -1   1  -3  376.36   33.20
  -1  -1   3  362.76   32.80
  -1  -1   3  363.46   33.10
  -1   1  -3  332.17   30.60
  -1   1  -3  384.46   32.30
   1  -1   3  431.16   33.40
   1   1  -3  449.46   35.50
   1   1  -3  477.85   35.40
   1   1  -3  429.86   41.10
   1   1  -3  428.26   35.00
   1   1  -3  500.15   37.40
   1  -1   3  456.25   37.00
   1   1  -3  425.66   38.60
   1  -1   3  425.76   36.40
   1  -1   3  421.46   34.80
   1   1  -3  491.85   32.90
  -1   1  -2  248.58   22.50
  -1  -1   2  293.57   24.50
  -1   1  -2  282.37   23.60
  -1   1  -2  301.77   24.20
  -1   1  -2  259.97   23.90
  -1  -1   2  306.37   25.60
  -1   1  -2  275.07   24.10
  -1   1  -2  285.77   24.00
  -1   1  -2  318.57   28.40
  -1  -1   2  285.37   23.20
   1   1  -2  307.97   24.60
   1   1  -2  298.87   21.70
   1   1  -2  305.47   23.90
   1   1  -2  306.97   27.30
   1  -1   2  303.47   24.70
   1   1  -2  287.67   24.30
   1   1  -2  321.87   25.30
   1  -1   2  309.57   24.80
   1   1  -2  285.97   22.90
   1  -1   2  295.07   23.50
  -1   1  -1   97.59   12.50
  -1   1  -1  102.09   11.70
  -1   1  -1   87.09   11.30
  -1   1  -1   88.09   10.00
  -1   1  -1  114.29   11.10
  -1  -1   1   99.69    9.10
  -1  -1   1  105.59   12.10
  -1  -1   1  115.49   12.40
  -1   1  -1  108.19   11.00
  -1  -1   1  112.99   10.90
  -1  -1   1  122.29   12.20
   1  -1   1   86.29   12.30
   1  -1   1   81.79   11.60
   1  -1   1   97.69   10.10
   1  -1   1   89.59   11.50
   1  -1   1   95.89   11.50
   1   1  -1   82.59   11.60
   1  -1   1   80.09   11.90
   1   1  -1   81.99    8.40
   1   1  -1   87.69   10.20
   1   1  -1   87.29   12.50
   1   1  -1   88.69   11.70
  -1  -1  -1  102.79   12.90
  -1   1   1   91.19   11.40
  -1  -1  -1   95.19   10.80
  -1   1   1   87.99   12.20
  -1  -1  -1   91.99   10.50
  -1   1   1   91.19   12.00
  -1  -1  -1   86.99   10.10
  -1   1   1   94.99   13.70
  -1  -1  -1   96.39   12.40
  -1   1   1   87.39   12.70
  -1  -1  -1   84.99   10.30
  -1  -1  -1   91.29   13.60
  -1  -1  -1   85.89   11.70
   1  -1  -1  118.09   15.10
   1  -1  -1   88.79   10.70
   1  -1  -1  100.09   12.40
   1  -1  -1  104.79   11.20
   1   1   1  100.49   11.20
   1   1   1  101.79   11.50
   1  -1  -1  111.69   12.70
   1   1   1  104.09   13.30
   1   1   1   95.19   11.30
  -1  -1  -2  299.47   24.20
  -1  -1  -2  307.97   24.00
  -1  -1  -2  315.77   24.90
  -1  -1  -2  267.37   25.70
  -1   1   2  258.87   23.00
  -1   1   2  294.87   25.20
  -1  -1  -2  305.87   24.90
  -1  -1  -2  320.07   25.10
  -1   1   2  282.37   24.30
  -1   1   2  306.67   27.00
  -1   1   2  288.47   24.60
  -1  -1  -2  320.27   24.70
   1  -1  -2  294.87   25.90
   1   1   2  280.67   24.00
   1  -1  -2  302.97   24.70
   1   1   2  227.38   23.40
   1   1   2  277.37   23.80
   1  -1  -2  288.37   24.00
   1  -1  -2  273.07   26.50
   1   1   2  282.97   24.40
   1  -1  -2  296.07   22.30
   1  -1  -2  263.17   23.30
  -1  -1  -3  464.25   38.10
  -1  -1  -3  459.15   36.70
  -1  -1  -3  418.56   34.00
  -1   1   3  477.95   38.70
  -1   1   3  514.35   42.00
  -1   1   3  491.15   37.60
  -1   1   3  486.35   36.80
  -1  -1  -3  473.55   41.40
  -1   1   3  449.76   36.70
  -1  -1  -3  421.36   34.00
  -1  -1  -3  447.16   35.40
  -1  -1  -3  451.35   37.10
   1   1   3  409.76   35.50
   1  -1  -3  368.56   36.00
   1  -1  -3  376.46   34.40
   1  -1  -3  353.36   32.50
   1   1   3  379.56   34.10
   1  -1  -3  385.16   36.30
   1   1   3  475.45   37.50
   1  -1  -3  399.86   31.20
   1   1   3  389.16   35.80
   1  -1  -3  392.86   34.20
  -1  -1  -4  356.96   37.10
  -1   1   4  372.76   41.40
  -1  -1  -4  477.55   39.90
  -1  -1  -4  306.17   43.50
  -1  -1  -4  396.06   44.40
  -1   1   4  425.46   42.00
  -1  -1  -4  417.56   40.90
   1  -1  -4  400.46   42.10
   1  -1  -4  383.16   37.50
   1  -1  -4  413.96   36.40
   1   1   4  505.45   44.90
   1  -1  -4  366.46   43.70
   1  -1  -4  394.56   40.90
   1   1   4  445.56   44.20
  -1  -1  -5  204.28   44.90
  -1  -1  -5  342.27   49.30
  -1  -1  -5  314.67   48.30
  -1   1   5  265.07   43.20
  -1   1   5  311.37   48.00
   1  -1  -5  384.26   57.99
   1   1   5  298.57   46.80
   1   1   5  331.97   50.29
   1  -1  -5  337.97   49.80
   1  -1  -5  307.17   48.30
  -1   1   6  100.69   40.30
  -1  -1  -6   79.79   30.50
  -1   1   6   55.19   27.30
  -1  -1  -6   62.69   30.20
  -1  -1  -6  105.59   41.60
   1   1   6   80.29   26.40
   1  -1  -6   68.49   34.80
   1  -1  -6   -4.00   29.70
   1   1   6   31.10   25.80
   1  -1  -6   49.30   36.40
  -2   1  -6   84.09   40.10
  -2   1  -6   68.09   33.20
  -2  -1   6   84.99   29.90
  -2   1  -6   45.20   30.00
   2   1  -6  160.98   42.00
   2   1  -6   53.89   33.00
   2  -1   6   97.39   36.00
   2   1  -6  100.69   36.10
  -2   1  -5  123.29   35.40
  -2  -1   5  102.89   28.60
  -2  -1   5   46.90   26.90
  -2   1  -5  148.59   33.40
   2  -1   5   65.89   24.90
   2   1  -5  106.19   33.50
   2   1  -5   79.99   28.70
   2  -1   5   91.09   31.00
   2   1  -5   54.79   28.60
  -2  -1   4    8.30   13.70
  -2  -1   4   11.10   13.60
  -2  -1   4   -7.70   10.20
  -2   1  -4   19.00   13.30
  -2   1  -4   24.50   16.60
  -2   1  -4   45.80   21.10
  -2   1  -4   25.50   17.40
   2   1  -4   32.10   16.90
   2  -1   4    1.90   14.90
   2   1  -4   27.10   17.20
   2   1  -4   -0.90   13.10
   2  -1   4   15.10   17.10
  -2   1  -3  332.37   31.50
  -2   1  -3  411.96   33.60
  -2   1  -3  341.17   32.30
  -2  -1   3  343.57   32.50
  -2   1  -3  371.06   33.00
  -2  -1   3  349.87   31.10
  -2   1  -3  369.96   32.90
  -2   1  -3  385.16   32.40
  -2  -1   3  301.37   30.50
  -2   1  -3  364.46   36.30
   2   1  -3  353.06   27.30
   2  -1   3  366.76   33.30
   2   1  -3  317.87   30.30
   2  -1   3  356.56   31.10
   2   1  -3  372.46   31.10
   2   1  -3  333.27   30.40
   2  -1   3  370.86   33.60
   2  -1   3  340.17   32.00
   2   1  -3  334.27   31.30
   2   1  -3  352.76   34.50
  -2   1  -2  807.32   46.10
  -2   1  -2  831.32   48.30
  -2  -1   2  825.02   46.80
  -2   1  -2  846.22   48.00
  -2   1  -2  788.52   46.60
  -2   1  -2  859.21   46.60
  -2  -1   2  836.72   46.30
  -2  -1   2  859.41   45.80
  -2   1  -2  792.32   46.20
  -2  -1   2  881.91   47.80
  -2  -1   2  817.72   49.10
   2   1  -2  827.32   49.20
   2  -1   2  872.31   47.70
   2  -1   2  830.02   48.20
   2   1  -2  865.51   45.80
   2   1  -2  849.72   41.00
   2   1  -2  863.21   47.80
   2  -1   2  860.71   46.90
   2  -1   2  814.22   45.40
   2   1  -2  798.32   45.90
   2  -1   2  836.52   47.30
  -2   1  -1 4772.92  180.18
  -2  -1   1 4615.34  179.38
  -2   1  -1 4649.43  178.48
  -2  -1   1 4643.94  176.98
  -2  -1   1 4661.13  179.08
  -2   1  -1 4643.34  178.18
  -2  -1   1 4633.34  172.38
  -2  -1   1 4686.73  177.58
  -2   1  -1 4554.74  180.28
  -2  -1   1 4688.43  177.98
  -2   1  -1 4531.85  179.98
  -2   1  -1 4701.53  178.98
   2   1  -1 4534.85  179.28
   2   1  -1 4528.15  172.08
   2  -1   1 4671.43  178.58
   2   1  -1 4532.75  176.68
   2  -1   1 4497.95  180.38
   2   1  -1 4517.85  177.38
   2  -1   1 4537.15  180.28
   2   1  -1 4563.44  179.38
   2  -1   1 4596.14  178.98
   2  -1   1 4506.15  177.98
   2  -1   1 4533.45  178.38
  -2  -1   0 1212.18   47.70
  -2  -1   0 1203.78   47.00
  -2   1   0 1233.48   49.99
  -2   1   0 1213.68   51.29
  -2   1   0 1235.98   49.99
  -2   1   0 1210.18   49.20
   2  -1   0 1240.68   49.90
   2   1   0 1197.08   46.80
   2  -1   0 1217.78   49.60
   2  -1   0 1227.08   53.69
   2  -1   0 1219.48   46.40
   2  -1   0 1212.28   49.60
  -2  -1  -1 4453.25  179.08
  -2   1   1 4563.94  181.68
  -2   1   1 4693.03  179.78
  -2   1   1 4562.14  179.78
  -2  -1  -1 4520.25  180.88
  -2  -1  -1 4564.24  179.68
  -2   1   1 4698.13  179.18
  -2   1   1 4747.52  182.78
  -2  -1  -1 4339.97  179.58
  -2  -1  -1 4626.84  178.78
   2   1   1 4586.14  179.18
   2  -1  -1 4870.01  183.18
   2   1   1 4739.33  180.08
   2  -1  -1 4599.84  179.78
   2   1   1 4644.04  178.98
   2  -1  -1 4599.54  178.68
   2  -1  -1 4714.23  179.78
   2   1   1 4726.73  180.38
   2  -1  -1 4827.92  182.98
   2   1   1 4592.44  180.78
   2   1   1 4612.44  178.98
  -2  -1  -2  778.62   45.90
  -2   1   2  792.42   45.60
  -2  -1  -2  813.52   45.70
  -2   1   2  840.12   47.80
  -2  -1  -2  876.61   48.00
  -2   1   2  828.02   49.80
  -2  -1  -2  896.31   48.30
  -2   1   2  832.12   46.70
  -2  -1  -2  840.22   50.79
  -2  -1  -2  801.52   46.10
  -2   1   2  882.31   48.20
  -2  -1  -2  898.81   48.50
  -2  -1  -2  801.22   47.20
   2  -1  -2  829.52   50.19
   2  -1  -2  804.22   45.90
   2  -1  -2  843.42   48.90
   2   1   2  829.92   46.60
   2  -1  -2  809.02   41.50
   2  -1  -2  863.11   47.10
   2   1   2  801.02   46.80
   2  -1  -2  799.82   45.70
   2   1   2  853.81   47.50
   2   1   2  890.41   47.90
  -2  -1  -3  337.37   35.80
  -2   1   3  365.46   32.00
  -2  -1  -3  392.16   32.50
  -2   1   3  349.27   33.10
  -2  -1  -3  418.86   34.10
  -2   1   3  379.96   32.60
  -2  -1  -3  354.46   33.50
  -2  -1  -3  380.46   33.90
  -2  -1  -3  358.46   31.90
  -2   1   3  369.76   34.20
  -2  -1  -3  392.76   33.70
  -2   1   3  348.67   34.70
   2  -1  -3  322.77   27.40
   2   1   3  373.36   33.50
   2  -1  -3  317.07   35.00
   2   1   3  386.76   34.10
   2  -1  -3  384.66   33.00
   2  -1  -3  350.06   32.20
   2   1   3  350.56   32.30
   2  -1  -3  400.96   35.20
   2   1   3  385.76   33.40
  -2  -1  -4   19.90   13.70
  -2  -1  -4   31.60   19.90
  -2   1   4   22.70   16.20
  -2  -1  -4   14.40   17.50
  -2  -1  -4   21.80   19.10
  -2  -1  -4    7.80   12.70
  -2   1   4    6.40   17.40
   2   1   4   43.10   20.10
   2  -1  -4   13.20   16.60
   2  -1  -4   15.30   18.80
   2  -1  -4   -3.80   12.90
   2   1   4   15.20   15.50
   2  -1  -4   -0.20   11.60
   2  -1  -4    5.00   12.60
  -2   1   5  173.28   37.20
  -2  -1  -5   80.49   28.10
  -2  -1  -5  106.59   34.40
  -2   1   5   88.99   30.30
  -2  -1  -5   70.69   25.90
   2  -1  -5  150.48   38.00
   2   1   5  131.19   32.30
   2  -1  -5  119.09   33.00
   2  -1  -5  140.39   44.90
   2   1   5  121.29   32.80
  -2  -1  -6  116.79   38.10
  -2  -1  -6  179.28   43.50
  -2  -1  -6  107.49   36.10
  -2   1   6   91.69   29.50
   2  -1  -6   86.49   38.40
   2  -1  -6  126.39   39.00
   2   1   6   99.29   32.50
   2  -1  -6   82.39   31.30
  -3   1  -6  -14.80   22.80
  -3  -1   6   80.99   37.80
  -3   1  -6   25.00   31.30
  -3   1  -6    3.40   30.90
   3  -1   6   61.79   31.40
   3   1  -6   34.90   28.10
   3   1  -6  106.69   36.50
   3   1  -6   31.40   31.00
  -3  -1   5  101.89   32.20
  -3  -1   5   80.49   25.60
  -3   1  -5  117.49   35.10
  -3   1  -5  125.49   32.70
  -3   1  -5   84.49   29.10
   3  -1   5  132.89   33.60
   3   1  -5  106.69   25.30
   3   1  -5  106.99   35.80
   3   1  -5  105.49   32.40
   3  -1   5  133.99   32.80
  -3  -1   4  608.94   51.09
  -3  -1   4  582.64   50.49
  -3   1  -4  585.44   49.50
  -3   1  -4  591.24   54.09
  -3   1  -4  605.94   58.29
  -3   1  -4  610.64   48.20
   3   1  -4  578.94   50.89
   3  -1   4  532.65   48.50
   3   1  -4  538.65   52.49
   3   1  -4  545.75   47.30
   3  -1   4  491.15   49.40
   3   1  -4  537.45   39.40
  -3   1  -3  158.08   29.70
  -3   1  -3  137.39   23.40
  -3   1  -3  146.59   25.40
  -3   1  -3  132.09   25.00
  -3  -1   3  129.69   23.60
  -3   1  -3  121.69   22.50
  -3   1  -3  110.39   22.30
  -3   1  -3  135.49   23.80
  -3  -1   3  143.79   23.10
  -3  -1   3  153.48   26.10
  -3  -1   3  138.29   26.40
  -3   1  -3  127.09   23.20
   3   1  -3  128.49   20.50
   3  -1   3  129.59   24.50
   3   1  -3  132.59   17.80
   3   1  -3  120.79   22.20
   3  -1   3  136.89   24.40
   3  -1   3  116.39   23.50
   3   1  -3   96.79   23.00
   3  -1   3  190.08   27.20
   3   1  -3  116.29   21.50
   3   1  -3  129.69   24.00
  -3   1  -2   77.49   15.90
  -3  -1   2   76.29   16.20
  -3   1  -2   65.39   15.10
  -3   1  -2   88.89   16.60
  -3   1  -2  100.39   16.60
  -3  -1   2   60.39   14.70
  -3   1  -2   83.29   15.90
  -3  -1   2   80.59   16.00
  -3   1  -2   88.99   18.00
  -3  -1   2   83.39   14.70
   3  -1   2   75.19   15.40
   3   1  -2   71.79   14.40
   3  -1   2   76.19   15.20
   3   1  -2   83.29   17.30
   3   1  -2   90.79   15.90
   3  -1   2   60.49   14.60
   3  -1   2   92.59   16.50
   3   1  -2   66.99   15.40
   3  -1   2   98.79   17.80
   3   1  -2   70.39   10.10
  -3   1  -1 2886.21  112.99
  -3   1  -1 2777.42  113.69
  -3   1  -1 2855.91  110.19
  -3   1  -1 2923.01  111.79
  -3  -1   1 2993.10  114.29
  -3   1  -1 2879.91  113.09
  -3  -1   1 2908.51  112.09
  -3  -1   1 2885.21  109.49
  -3  -1   1 2909.11  109.89
  -3  -1   1 2867.01  109.79
  -3   1  -1 2911.61  114.19
   3  -1   1 2486.65  112.99
   3  -1   1 2594.74  112.99
   3   1  -1 2503.75  110.69
   3  -1   1 2490.65  110.49
   3  -1   1 2502.05  111.09
   3  -1   1 2631.94  109.69
   3  -1   1 2556.64  110.79
   3   1  -1 2440.56  108.09
  -3   1   0  138.09   11.10
  -3  -1   0  134.59    9.00
  -3  -1   0  141.69   10.10
  -3   1   0  139.79   13.20
  -3   1   0  126.39   11.10
  -3  -1   0  132.89    8.30
  -3   1   0  125.89   10.40
   3  -1   0  145.79   11.00
   3   1   0  140.89    8.90
   3  -1   0  125.19   10.50
   3  -1   0  121.39   10.70
   3  -1   0  128.89    6.70
   3  -1   0  129.99   12.40
  -3  -1  -1 2522.45  108.79
  -3  -1  -1 2519.05  110.49
  -3   1   1 2517.95  109.89
  -3  -1  -1 2484.15  111.89
  -3  -1  -1 2589.74  109.89
  -3   1   1 2552.34  108.19
  -3   1   1 2567.74  109.69
  -3  -1  -1 2503.55  112.49
  -3  -1  -1 2490.95  108.69
  -3   1   1 2582.84  112.89
  -3   1   1 2565.84  113.39
   3  -1  -1 2828.92  114.49
   3   1   1 2842.12  111.29
   3  -1  -1 2961.40  109.19
   3  -1  -1 2972.10  111.19
   3  -1  -1 2875.41  114.09
   3   1   1 2924.61  113.09
   3   1   1 2893.21  109.19
   3  -1  -1 2920.61  103.29
   3   1   1 2827.42  110.19
   3  -1  -1 2969.30  110.99
   3   1   1 2898.91  110.09
  -3  -1  -2   85.09   16.20
  -3   1   2   81.19   15.90
  -3   1   2   77.19   14.60
  -3  -1  -2   71.49   13.80
  -3   1   2   77.89   19.60
  -3  -1  -2   91.59   16.90
  -3  -1  -2   71.99   17.30
  -3   1   2   88.19   16.40
  -3  -1  -2   81.79   16.80
  -3   1   2   71.69   15.90
  -3  -1  -2   68.69   15.10
  -3  -1  -2   71.99   15.50
   3  -1  -2   86.69   15.60
   3  -1  -2   83.89   15.50
   3   1   2   67.99   15.30
   3   1   2   71.39   14.60
   3   1   2   58.99   14.30
   3  -1  -2   75.69   17.30
   3  -1  -2   61.79   16.20
   3  -1  -2   60.69   13.50
   3   1   2   75.89   16.50
  -3  -1  -3  160.08   29.20
  -3  -1  -3  108.29   21.40
  -3   1   3  122.59   23.60
  -3   1   3  139.99   23.50
  -3  -1  -3  141.59   24.60
  -3  -1  -3  118.89   20.80
  -3  -1  -3  131.89   24.50
  -3   1   3  123.69   24.80
  -3  -1  -3  118.49   22.10
  -3   1   3  112.69   23.00
  -3   1   3  142.39   24.60
   3   1   3  124.19   23.50
   3   1   3  114.49   22.70
   3  -1  -3  103.39   23.70
   3  -1  -3  124.99   22.30
   3   1   3  155.18   26.80
   3  -1  -3  109.39   17.40
   3  -1  -3  127.29   26.60
   3  -1  -3  123.69   22.90
   3   1   3  147.69   25.30
  -3   1   4  540.55   48.20
  -3  -1  -4  561.94   47.00
  -3  -1  -4  643.34   51.59
  -3  -1  -4  568.34   54.69
  -3  -1  -4  570.34   50.49
  -3   1   4  541.45   49.10
  -3  -1  -4  541.15   48.30
   3  -1  -4  660.23   51.59
   3   1   4  594.64   50.49
   3  -1  -4  537.55   40.40
   3  -1  -4  564.74   52.49
   3  -1  -4  552.94   54.19
   3   1   4  617.44   52.79
  -3  -1  -5   79.29   32.60
  -3  -1  -5  103.89   27.90
  -3  -1  -5  175.98   38.40
  -3   1   5   75.49   27.70
  -3   1   5  102.09   30.80
   3  -1  -5   59.69   21.40
   3  -1  -5  100.19   28.10
   3   1   5  121.19   31.20
   3  -1  -5   62.49   30.10
   3   1   5   92.59   29.30
   3  -1  -5   57.79   26.50
  -3  -1  -6   21.10   27.00
  -3  -1  -6  109.89   35.20
  -3   1   6   68.99   33.60
  -3  -1  -6   55.49   34.20
   3  -1  -6   55.99   35.00
   3   1   6   31.20   29.00
   3  -1  -6   99.29   34.70
   3  -1  -6   58.69   36.00
  -4  -1   6   74.09   33.80
  -4   1  -6  109.09   36.80
  -4   1  -6   78.69   31.60
  -4  -1   6   46.60   34.70
  -4   1  -6   71.29   32.90
   4   1  -6   33.80   36.70
   4   1  -6   24.80   30.60
   4  -1   6   61.89   33.10
   4   1  -6  119.39   35.90
  -4   1  -5   77.59   30.50
  -4  -1   5   36.30   22.90
  -4  -1   5   82.69   30.30
  -4   1  -5   20.40   21.80
  -4   1  -5   81.89   27.10
   4   1  -5   16.70   25.10
   4   1  -5  106.99   34.20
   4   1  -5   30.40   21.80
   4  -1   5   80.59   29.00
   4  -1   5  101.19   29.90
  -4   1  -4    6.70   13.20
  -4   1  -4   13.60   18.00
  -4   1  -4    8.30   15.00
  -4  -1   4    5.40   14.00
  -4  -1   4    8.30   14.60
  -4   1  -4    8.30   13.40
   4   1  -4   23.90   11.90
   4  -1   4    9.10   17.40
   4  -1   4   31.50   19.10
   4   1  -4   -0.50   15.30
   4   1  -4   27.90   16.80
   4   1  -4   17.10   18.60
  -4  -1   3  222.58   26.70
  -4   1  -3  193.88   23.30
  -4   1  -3  235.78   33.10
  -4   1  -3  256.37   29.20
  -4  -1   3  282.37   28.80
  -4  -1   3  216.08   24.50
  -4   1  -3  237.48   26.40
  -4  -1   3  206.78   30.00
  -4   1  -3  236.78   33.00
  -4   1  -3  198.28   34.00
  -4  -1   3  260.17   36.20
   4  -1   3  256.97   28.10
   4   1  -3  259.77   26.70
   4   1  -3  255.77   29.80
   4   1  -3  267.37   36.70
   4  -1   3  288.77   30.20
   4   1  -3  260.87   27.80
   4  -1   3  250.57   26.60
   4   1  -3  292.47   21.40
   4  -1   3  258.47   29.20
  -4   1  -2 1255.57   67.49
  -4   1  -2 1294.37   65.79
  -4  -1   2 1255.57   67.49
  -4  -1   2 1228.38   67.79
  -4   1  -2 1263.67   68.59
  -4   1  -2 1304.97   68.79
  -4  -1   2 1298.37   65.89
  -4   1  -2 1290.37   65.99
  -4   1  -2 1284.57   68.99
  -4  -1   2 1228.38   63.89
  -4  -1   2 1298.97   65.89
   4  -1   2 1460.75   68.19
   4   1  -2 1447.86   66.29
   4   1  -2 1250.57   69.89
   4  -1   2 1477.05   68.29
   4   1  -2 1375.16   54.99
   4   1  -2 1370.36   69.69
   4  -1   2 1408.66   70.19
   4   1  -2 1438.46   70.69
   4  -1   2 1421.66   68.29
   4  -1   2 1398.76   68.09
  -4   1  -1 1198.18   57.29
  -4   1  -1 1196.58   53.89
  -4  -1   1 1167.28   53.89
  -4  -1   1 1216.48   59.69
  -4  -1   1 1269.57   54.99
  -4  -1   1 1250.27   53.69
  -4  -1   1 1193.98   56.59
  -4   1  -1 1156.28   58.99
  -4   1  -1 1261.77   59.49
  -4   1  -1 1270.67   59.29
  -4   1  -1 1271.27   56.99
   4   1  -1 1174.38   56.49
   4  -1   1 1201.38   56.09
   4  -1   1 1238.78   56.89
   4  -1   1 1262.77   62.39
   4  -1   1 1258.37   60.29
   4   1  -1 1208.88   53.19
   4  -1   1 1209.78   54.39
   4  -1   1 1222.58   59.09
  -4   1   0  304.67   19.20
  -4   1   0  300.77   19.20
  -4  -1   0  309.77   18.60
  -4  -1   0  292.57   18.30
  -4  -1   0  307.67   16.40
  -4   1   0  286.37   18.50
  -4   1   0  280.17   20.90
  -4  -1   0  322.37   17.20
   4  -1   0  343.77   19.70
   4  -1   0  308.07   18.20
   4  -1   0  297.87   19.00
   4   1   0  306.47   16.70
   4   1   0  306.07   18.20
   4   1   0  295.07   13.60
   4  -1   0  326.37   21.50
  -4  -1  -1 1232.18   57.29
  -4   1   1 1225.58   53.49
  -4   1   1 1204.78   60.99
  -4   1   1 1202.78   56.49
  -4  -1  -1 1188.98   63.69
  -4  -1  -1 1249.97   56.19
  -4   1   1 1201.28   59.19
  -4   1   1 1236.48   56.39
  -4  -1  -1 1241.08   59.39
  -4  -1  -1 1238.68   54.89
  -4  -1  -1 1248.98   55.49
   4   1   1 1215.68   55.19
   4  -1  -1 1181.58   55.39
   4   1   1 1231.98   54.09
   4  -1  -1 1226.48   48.10
   4   1   1 1274.07   55.29
   4   1   1 1214.08   54.99
   4  -1  -1 1250.67   53.29
   4   1   1 1253.97   57.19
   4  -1  -1 1187.58   55.49
   4  -1  -1 1167.68   58.49
   4   1   1 1244.88   58.89
  -4  -1  -2 1451.45   71.09
  -4   1   2 1407.76   70.89
  -4  -1  -2 1512.15   70.79
  -4   1   2 1411.06   67.19
  -4  -1  -2 1426.66   67.39
  -4   1   2 1487.35   67.89
  -4   1   2 1453.65   68.99
  -4  -1  -2 1361.86   69.79
  -4  -1  -2 1532.45   72.49
  -4  -1  -2 1412.16   67.19
   4   1   2 1213.68   67.19
   4  -1  -2 1287.27   70.59
   4   1   2 1209.08   67.19
   4  -1  -2 1298.77   70.79
   4  -1  -2 1270.97   65.59
   4   1   2 1324.07   66.99
   4   1   2 1282.17   66.19
   4  -1  -2 1221.18   56.49
   4   1   2 1376.46   68.19
   4  -1  -2 1259.07   64.79
   4   1   2 1280.77   65.29
   4  -1  -2 1274.97   65.59
  -4  -1  -3  233.58   33.20
  -4  -1  -3  269.67   35.70
  -4  -1  -3  337.87   31.00
  -4  -1  -3  257.77   35.10
  -4   1   3  234.68   37.30
  -4  -1  -3  240.08   28.30
  -4   1   3  282.37   29.80
  -4   1   3  282.37   31.30
  -4  -1  -3  245.78   26.10
  -4  -1  -3  270.17   43.50
  -4   1   3  265.47   29.50
  -4   1   3  283.87   27.80
  -4  -1  -3  281.47   27.90
   4   1   3  246.48   33.90
   4   1   3  251.27   36.50
   4  -1  -3  203.98   32.40
   4  -1  -3  254.27   36.60
   4   1   3  277.17   27.20
   4   1   3  222.28   32.20
   4  -1  -3  201.48   24.80
   4  -1  -3  239.58   26.70
  -4  -1  -4    5.00   14.00
  -4  -1  -4   10.40   15.70
  -4   1   4    5.60   14.80
  -4   1   4    9.90   16.60
  -4  -1  -4    9.70   12.80
  -4   1   4    8.30   15.90
  -4  -1  -4   16.90   14.80
  -4   1   4    6.30   14.40
  -4  -1  -4   40.70   19.50
   4  -1  -4  -11.70    9.30
   4  -1  -4   -2.70   17.10
   4  -1  -4    5.00   17.50
   4  -1  -4   30.70   16.40
   4   1   4    3.60   14.70
   4   1   4    0.60   14.50
  -4  -1  -5   76.19   29.50
  -4   1   5   37.50   23.30
  -4  -1  -5   70.89   32.00
  -4   1   5   78.79   25.70
  -4  -1  -5   86.09   28.10
   4  -1  -5   47.40   22.80
   4  -1  -5   58.19   19.90
   4  -1  -5  120.59   34.10
   4   1   5  142.19   33.00
   4  -1  -5   48.90   27.90
   4   1   5   46.60   25.40
  -4   1   6   54.29   33.00
  -4   1   6  126.79   40.40
  -4  -1  -6   67.09   41.70
  -4  -1  -6   70.19   30.00
  -4  -1  -6  107.69   35.20
   4   1   6   16.00   25.80
   4  -1  -6   63.99   32.60
   4  -1  -6   35.00   30.60
   4   1   6   59.49   36.60
   4  -1  -6  131.79   46.80
  -5   1  -6   17.80   25.20
  -5   1  -6   -8.40   23.70
  -5  -1   6   -6.50   22.90
   5   1  -6   -5.40   30.10
   5  -1   6   46.30   26.90
   5   1  -6   14.10   33.10
   5   1  -6  -45.40   31.40
  -5  -1   5  236.78   43.60
  -5   1  -5  219.08   41.20
  -5  -1   5  250.67   43.80
  -5   1  -5  277.87   52.19
  -5   1  -5  213.48   42.20
   5  -1   5  203.98   38.70
   5   1  -5  268.67   48.50
   5  -1   5  179.68   41.00
   5   1  -5  164.18   26.70
   5   1  -5  218.68   44.80
   5   1  -5  257.27   40.70
  -5   1  -4  176.88   33.30
  -5   1  -4  189.78   38.80
  -5   1  -4  142.19   29.80
  -5   1  -4  240.48   36.00
  -5  -1   4  175.48   32.20
  -5  -1   4  193.78   34.40
   5  -1   4  139.79   31.20
   5  -1   4  159.68   33.30
   5   1  -4  185.68   36.80
   5   1  -4  141.59   19.50
   5   1  -4  153.38   29.70
   5   1  -4  188.88   35.40
  -5   1  -3  240.78   34.60
  -5   1  -3  259.27   36.90
  -5   1  -3  266.47   36.70
  -5  -1   3  208.88   24.40
  -5  -1   3  262.87   34.50
  -5  -1   3  238.68   32.60
  -5  -1   3  253.47   33.70
  -5   1  -3  248.38   38.50
  -5  -1   3  238.98   29.30
  -5   1  -3  250.47   34.70
  -5   1  -3  227.38   26.40
   5   1  -3  257.07   18.40
   5  -1   3  292.97   29.90
   5  -1   3  253.57   29.30
   5  -1   3  290.07   31.10
   5   1  -3  280.37   28.10
   5   1  -3  261.57   31.60
   5  -1   3  297.57   30.70
   5  -1   3  298.67   32.70
   5   1  -3  273.77   28.70
   5   1  -3  209.48   32.50
   5  -1   3  279.27   29.80
  -5   1  -2   75.59   15.70
  -5   1  -2   61.79   16.20
  -5  -1   2   43.70   14.20
  -5  -1   2   48.90   13.70
  -5  -1   2   78.79   16.60
  -5   1  -2   50.99   14.50
  -5   1  -2   55.09   15.30
  -5  -1   2   58.99   13.70
  -5   1  -2   53.49   14.10
  -5   1  -2   47.30   13.00
  -5  -1   2   49.99   12.30
   5   1  -2   35.40   10.80
   5  -1   2   16.00   10.90
   5   1  -2   24.50   12.90
   5  -1   2   37.60   11.40
   5  -1   2   47.10   13.10
   5   1  -2   35.60   10.70
   5  -1   2   36.40   12.40
   5  -1   2   29.40   11.70
  -5  -1   1  620.44   34.90
  -5  -1   1  622.54   33.10
  -5  -1   1  614.14   34.60
  -5   1  -1  630.14   39.50
  -5   1  -1  664.93   40.40
  -5  -1   1  654.53   37.70
  -5   1  -1  672.73   37.60
  -5   1  -1  632.84   38.10
  -5   1  -1  606.54   39.10
  -5   1  -1  670.13   34.40
   5  -1   1  728.43   40.90
   5  -1   1  727.03   43.20
   5   1  -1  787.22   38.80
   5  -1   1  800.52   38.80
   5  -1   1  793.32   35.90
   5  -1   1  795.32   43.20
   5   1  -1  806.92   34.50
   5   1  -1  785.82   35.80
  -5  -1   0 1581.74   65.29
  -5   1   0 1614.84   71.69
  -5  -1   0 1569.34   60.19
  -5   1   0 1543.65   68.59
  -5  -1   0 1531.55   60.39
  -5  -1   0 1614.44   67.89
  -5  -1   0 1596.14   65.99
  -5  -1   0 1594.84   68.09
  -5   1   0 1592.34   68.79
  -5   1   0 1586.74   67.99
   5  -1   0 1604.94   71.49
   5  -1   0 1527.05   68.29
   5   1   0 1552.44   61.29
   5   1   0 1515.55   67.29
   5  -1   0 1662.13   68.79
   5   1   0 1609.44   65.59
   5  -1   0 1600.44   66.89
  -5   1   1  800.42   42.50
  -5  -1  -1  744.23   42.30
  -5   1   1  788.22   29.70
  -5  -1  -1  795.52   40.10
  -5   1   1  717.73   43.10
  -5   1   1  754.32   38.40
  -5  -1  -1  790.22   38.00
  -5   1   1  766.02   34.30
  -5  -1  -1  746.63   35.90
  -5  -1  -1  825.12   43.00
  -5  -1  -1  807.32   38.90
   5  -1  -1  624.44   39.00
   5   1   1  614.84   34.60
   5   1   1  603.94   34.90
   5  -1  -1  631.34   30.20
   5  -1  -1  647.14   33.00
   5   1   1  626.94   37.60
   5   1   1  607.54   33.80
   5  -1  -1  659.03   36.30
   5   1   1  681.53   40.80
   5  -1  -1  652.23   36.60
  -5  -1  -2   35.50   13.10
  -5   1   2   52.69   13.40
  -5  -1  -2   60.09   13.40
  -5  -1  -2   49.80   14.00
  -5   1   2   37.80   13.90
  -5  -1  -2   62.29   16.30
  -5  -1  -2   53.29   14.20
  -5  -1  -2   51.89   12.60
  -5   1   2   57.49   13.70
  -5   1   2   48.60   14.00
   5  -1  -2   49.60    6.80
   5   1   2   52.79   14.20
   5  -1  -2   67.49   14.50
   5   1   2   41.30   12.20
   5   1   2   78.49   15.90
   5  -1  -2   44.70   13.00
   5  -1  -2   67.99   16.90
   5  -1  -2   40.40   11.20
   5   1   2   67.19   14.50
   5  -1  -2   55.79    7.00
   5   1   2   64.69   15.80
   5   1   2   41.80   13.00
  -5   1   3  291.57   31.10
  -5  -1  -3  214.18   29.60
  -5  -1  -3  287.67   39.60
  -5   1   3  257.67   36.30
  -5   1   3  252.77   27.60
  -5  -1  -3  286.77   29.90
  -5  -1  -3  246.18   34.90
  -5  -1  -3  266.47   31.20
  -5   1   3  250.57   28.20
  -5  -1  -3  303.27   42.30
  -5  -1  -3  229.98   27.40
  -5  -1  -3  268.07   38.90
   5   1   3  243.08   27.70
   5   1   3  244.58   34.30
   5  -1  -3  232.48   31.80
   5   1   3  280.47   30.10
   5  -1  -3  234.48   26.10
   5  -1  -3  309.27   34.10
   5   1   3  256.77   28.50
   5  -1  -3  224.58   18.70
  -5   1   4  179.88   30.30
  -5  -1  -4  193.08   33.30
  -5  -1  -4  144.19   27.30
  -5   1   4  128.09   32.90
  -5   1   4  162.78   32.40
  -5   1   4  131.79   28.70
  -5  -1  -4  137.19   31.70
  -5  -1  -4  129.49   32.70
  -5  -1  -4  171.68   31.80
   5   1   4  155.58   31.90
   5   1   4  219.58   35.80
   5  -1  -4  152.08   34.00
   5  -1  -4  169.28   30.10
   5  -1  -4  198.18   24.00
  -5  -1  -5  258.67   46.60
  -5   1   5  287.37   45.50
  -5   1   5  236.18   43.80
  -5  -1  -5  227.28   39.60
  -5  -1  -5  226.48   46.00
  -5  -1  -5  251.27   51.49
   5   1   5  294.57   47.10
   5   1   5  228.98   41.50
   5  -1  -5  199.18   45.70
   5  -1  -5  240.68   31.90
   5  -1  -5  300.37   46.50
   5  -1  -5  192.18   42.70
  -5   1   6    6.70   24.20
  -5  -1  -6  -43.60   20.90
  -5  -1  -6   32.60   26.30
   5  -1  -6  -10.40   27.60
   5   1   6  -10.90   25.50
   5  -1  -6  -25.00   31.10
   5   1   6   24.50   24.80
   5  -1  -6   15.20   29.90
  -6  -1   5   58.89   23.00
  -6   1  -5   69.69   31.40
  -6   1  -5   30.80   21.90
  -6  -1   5   25.80   21.00
  -6   1  -5   48.30   24.60
   6   1  -5   31.50   15.20
   6   1  -5    7.00   24.20
   6   1  -5   60.69   31.10
   6  -1   5   39.20   24.60
   6   1  -5    6.10   18.80
   6  -1   5   43.50   23.80
  -6   1  -4   20.50   16.90
  -6   1  -4   29.60   14.90
  -6   1  -4   10.30   16.00
  -6  -1   4   21.60   18.40
  -6  -1   4    3.90   16.20
  -6   1  -4   16.40   21.90
  -6  -1   4   28.30   18.20
  -6   1  -4   52.29   19.80
   6   1  -4   60.49   23.80
   6  -1   4   58.19   22.90
   6   1  -4   32.70   21.20
   6  -1   4   19.10   19.90
   6   1  -4   14.70   14.20
  -6  -1   3  439.26   35.20
  -6  -1   3  348.77   37.10
  -6  -1   3  430.46   36.30
  -6   1  -3  439.16   39.80
  -6  -1   3  408.76   37.30
  -6  -1   3  429.66   38.90
  -6   1  -3  508.35   42.10
  -6   1  -3  458.15   40.50
  -6   1  -3  426.06   36.10
  -6   1  -3  440.16   39.50
   6  -1   3  371.76   36.20
   6   1  -3  411.96   20.80
   6  -1   3  439.96   37.90
   6   1  -3  379.96   34.40
   6   1  -3  367.36   33.30
   6   1  -3  386.16   39.70
   6  -1   3  437.26   36.80
   6  -1   3  423.46   37.50
   6  -1   3  392.76   38.10
  -6   1  -2 1211.58   72.89
  -6   1  -2 1156.68   62.39
  -6   1  -2 1193.38   72.59
  -6  -1   2 1130.69   66.29
  -6   1  -2 1215.38   67.69
  -6  -1   2 1178.58   62.09
  -6   1  -2 1110.79   59.79
  -6  -1   2 1127.79   59.89
  -6  -1   2 1164.88   59.89
  -6   1  -2 1146.19   65.69
  -6  -1   2 1142.79   64.19
   6  -1   2 1252.97   65.69
   6  -1   2 1182.38   66.19
   6  -1   2 1221.28   62.19
   6   1  -2 1179.68   59.09
   6  -1   2 1205.78   63.39
   6   1  -2 1198.38   60.29
   6  -1   2 1304.17   62.99
   6   1  -2 1290.07   66.09
  -6   1  -1   18.90    6.50
  -6   1  -1   26.30   10.60
  -6  -1   1    6.30    6.30
  -6  -1   1   16.30    7.00
  -6  -1   1   15.70    6.20
  -6  -1   1   20.90    2.90
  -6   1  -1   22.00   10.90
  -6   1  -1   16.30    9.50
  -6   1  -1    7.80    7.40
  -6  -1   1   23.60    9.40
  -6   1  -1   11.10    8.80
   6  -1   1   45.00    9.90
   6   1  -1   46.10    8.90
   6  -1   1   46.40   13.40
   6  -1   1   61.59   14.60
  -6  -1   0   36.30    8.80
  -6  -1   0   40.00    3.40
  -6   1   0   30.00    8.70
  -6  -1   0   42.70    8.60
  -6   1   0   44.20    9.90
  -6   1   0   36.40    9.30
  -6  -1   0   37.80    9.30
  -6  -1   0   60.69    9.90
  -6  -1   0   43.00    3.40
  -6   1   0   39.10   10.60
   6  -1   0   38.90    8.50
   6   1   0   48.60    8.80
   6   1   0   46.50    5.70
   6  -1   0   49.20   10.70
   6   1   0   52.59   10.80
   6  -1   0   31.20   14.50
   6  -1   0   42.10   11.20
  -6   1   1   49.00    8.10
  -6  -1  -1   64.49   10.60
  -6  -1  -1   49.00   10.50
  -6   1   1   48.70   11.30
  -6  -1  -1   53.89   13.50
  -6   1   1   55.69    6.40
  -6  -1  -1   40.60   12.40
  -6   1   1   59.79   12.20
  -6   1   1   58.59   14.00
  -6  -1  -1   62.99   12.70
  -6  -1  -1   65.89   12.90
   6  -1  -1   26.40   10.80
   6  -1  -1   26.00    8.90
  -6  -1  -2 1170.58   65.29
  -6   1   2 1272.67   64.09
  -6  -1  -2 1222.38   68.19
  -6   1   2 1266.97   69.99
  -6  -1  -2 1314.57   69.59
  -6  -1  -2 1280.67   63.59
  -6   1   2 1226.38   64.49
  -6   1   2 1239.18   61.19
  -6  -1  -2 1211.68   61.89
  -6  -1  -2 1296.67   66.79
   6   1   2 1152.28   60.19
   6  -1  -2 1170.68   59.69
   6  -1  -2 1161.28   60.99
   6   1   2 1154.48   65.79
   6   1   2 1197.58   62.39
   6   1   2 1119.29   63.99
   6  -1  -2 1203.88   67.19
   6   1   2 1105.29   61.19
   6   1   2 1307.97   64.29
   6  -1  -2 1144.79   61.49
  -6   1   3  445.96   38.60
  -6  -1  -3  367.46   36.70
  -6   1   3  361.66   34.30
  -6   1   3  375.76   38.00
  -6  -1  -3  379.96   40.40
  -6   1   3  398.96   35.40
  -6  -1  -3  366.46   37.20
  -6  -1  -3  378.96   34.60
  -6  -1  -3  369.26   38.00
  -6  -1  -3  377.76   37.40
  -6   1   3  419.16   39.90
   6  -1  -3  449.86   23.30
   6   1   3  457.05   37.60
   6  -1  -3  416.46   36.20
   6   1   3  448.56   38.50
   6  -1  -3  401.56   39.60
   6  -1  -3  412.16   34.60
   6   1   3  489.25   40.60
   6  -1  -3  462.05   43.60
   6  -1  -3  444.36   23.60
   6   1   3  464.65   35.60
  -6   1   4   33.60   22.00
  -6  -1  -4   64.69   21.10
  -6  -1  -4    8.20   17.70
  -6   1   4   49.50   17.10
  -6  -1  -4   57.89   22.50
  -6   1   4   42.70   20.60
  -6  -1  -4   37.50   20.20
  -6  -1  -4   44.00   18.30
  -6   1   4   44.00   19.10
   6  -1  -4   38.10   18.80
   6   1   4   22.30   17.00
   6  -1  -4   21.30   10.30
   6  -1  -4   31.90   22.10
   6   1   4   25.40   17.80
  -6   1   5   73.59   26.80
  -6  -1  -5   19.20   23.40
  -6  -1  -5   24.00   25.60
  -6  -1  -5   30.10   25.30
  -6   1   5   23.90   20.40
  -6  -1  -5   87.49   26.30
   6  -1  -5   68.49   24.70
   6  -1  -5    3.20   24.90
   6   1   5   52.49   25.40
   6   1   5   18.50   21.60
   6  -1  -5   17.30   24.60
   6  -1  -5   34.60   16.80
  -7   1  -5  314.57   51.89
  -7  -1   5  178.78   39.70
  -7  -1   5  232.28   41.30
  -7   1  -5  259.67   48.90
  -7   1  -5  222.68   42.20
   7  -1   5  227.98   41.90
   7   1  -5  268.07   21.60
   7   1  -5  273.27   48.60
   7   1  -5  282.37   43.50
   7  -1   5  312.97   47.50
  -7  -1   4  253.87   38.70
  -7   1  -4  323.27   45.20
  -7   1  -4  256.17   41.30
  -7   1  -4  227.18   44.00
  -7  -1   4  227.48   33.80
  -7   1  -4  200.98   34.50
  -7  -1   4  210.98   36.00
  -7  -1   4  239.58   41.90
   7  -1   4  269.47   41.40
   7   1  -4  295.17   34.00
   7  -1   4  290.37   42.70
   7   1  -4  290.07   16.80
   7   1  -4  306.27   16.70
   7   1  -4  270.67   42.50
  -7   1  -3  106.29   26.00
  -7  -1   3  161.18   25.10
  -7  -1   3  223.08   32.60
  -7  -1   3  166.68   30.70
  -7   1  -3  166.28   27.00
  -7   1  -3  169.48   30.20
  -7   1  -3  183.28   31.50
  -7  -1   3  133.99   24.20
  -7  -1   3  198.38   32.30
   7  -1   3  152.98   27.60
   7  -1   3  203.08   31.70
   7   1  -3  182.58   26.70
   7   1  -3  100.59   23.80
   7  -1   3  147.59   26.40
   7  -1   3  153.98   27.70
   7  -1   3  117.39   24.40
   7   1  -3  161.28   25.30
  -7  -1   2  257.77   26.90
  -7   1  -2  275.87   27.80
  -7  -1   2  254.57   22.90
  -7   1  -2  301.37   24.70
  -7   1  -2  241.68   26.20
  -7  -1   2  286.17   24.70
  -7  -1   2  260.37   28.50
  -7  -1   2  304.97   25.60
  -7   1  -2  240.28   24.70
  -7   1  -2  263.97   29.10
  -7   1  -2  229.38   26.90
   7  -1   2  247.98   25.10
   7  -1   2  238.18   23.50
   7  -1   2  239.38   24.20
   7   1  -2  257.37   22.20
   7   1  -2  297.07   28.10
   7  -1   2  264.67   28.80
  -7   1  -1  338.87   30.00
  -7  -1   1  368.26   27.30
  -7  -1   1  364.46   20.20
  -7   1  -1  374.06   28.90
  -7   1  -1  352.86   21.10
  -7   1  -1  342.27   27.30
  -7  -1   1  315.37   23.40
  -7  -1   1  342.17   16.60
  -7   1  -1  334.57   26.10
  -7   1  -1  350.56   29.00
  -7  -1   1  366.16   24.70
   7  -1   1  303.17   27.30
   7   1  -1  347.47   19.30
   7  -1   1  354.96   21.70
   7  -1   1  348.37   26.00
   7  -1   1  315.67   23.60
   7   1  -1  326.17   23.20
   7   1  -1  362.06   26.20
   7  -1   1  363.56   30.20
  -7   1   0   76.79   13.60
  -7  -1   0   87.09   13.80
  -7   1   0   96.09   15.10
  -7   1   0  107.09   17.60
  -7  -1   0  111.59   14.70
  -7  -1   0   96.39   15.30
  -7   1   0  101.09   14.70
  -7  -1   0   96.69   13.00
   7   1   0   90.59    7.50
   7  -1   0   78.39   14.20
   7  -1   0   84.79   16.00
   7   1   0   73.09   11.30
   7  -1   0   93.69   12.50
  -7   1   1  354.96   25.60
  -7  -1  -1  363.86   21.70
  -7  -1  -1  349.96   26.90
  -7   1   1  333.87   28.20
  -7  -1  -1  341.27   29.90
  -7   1   1  349.27   26.40
  -7  -1  -1  334.67   25.70
  -7   1   1  323.67   17.80
  -7  -1  -1  338.97   28.10
  -7  -1  -1  355.06   24.70
   7   1   1  338.27   26.10
   7  -1  -1  301.47   29.40
   7  -1  -1  356.86   28.10
   7  -1  -1  335.57   23.50
   7  -1  -1  335.37   18.60
   7   1   1  308.57   20.50
  -7  -1  -2  260.37   26.60
  -7  -1  -2  245.38   24.10
  -7   1   2  288.77   33.10
  -7   1   2  256.87   29.30
  -7  -1  -2  244.78   28.30
  -7   1   2  267.17   22.70
  -7   1   2  244.18   27.80
  -7  -1  -2  233.18   26.10
  -7   1   2  264.77   25.20
  -7  -1  -2  273.47   23.60
   7  -1  -2  233.78   21.40
   7   1   2  264.37   24.40
   7  -1  -2  270.07   23.90
   7   1   2  255.47   22.60
   7   1   2  288.07   27.50
   7  -1  -2  244.48   26.80
   7   1   2  218.78   22.20
   7   1   2  259.67   26.20
  -7  -1  -3  175.28   31.30
  -7   1   3  147.29   26.60
  -7   1   3  131.39   26.50
  -7  -1  -3  131.19   28.40
  -7  -1  -3  164.58   26.70
  -7  -1  -3  150.48   29.90
  -7   1   3  185.08   36.80
  -7   1   3  123.09   22.60
  -7  -1  -3  172.88   30.20
  -7   1   3   97.29   22.00
  -7  -1  -3  202.88   34.40
   7  -1  -3  160.08   25.00
   7   1   3  146.39   24.40
   7  -1  -3  196.48   23.20
   7   1   3  149.19   27.00
   7  -1  -3  152.68   28.90
   7   1   3  177.68   27.80
  -7  -1  -4  312.27   45.30
  -7  -1  -4  276.07   44.10
  -7  -1  -4  288.27   41.40
  -7   1   4  264.37   42.70
  -7   1   4  239.58   37.20
  -7  -1  -4  283.67   43.20
  -7   1   4  343.67   39.60
  -7   1   4  264.17   38.70
  -7  -1  -4  299.57   39.40
   7   1   4  244.18   37.90
   7  -1  -4  224.48   17.50
   7  -1  -4  228.78   34.60
   7  -1  -4  245.78   18.00
   7  -1  -4  295.77   69.19
   7   1   4  250.07   39.60
  -7  -1  -5  256.67   41.60
  -7  -1  -5  265.07   50.39
  -7   1   5  224.48   41.30
  -7  -1  -5  282.67   48.20
  -7  -1  -5  218.28   41.90
  -7   1   5  259.67   41.20
   7   1   5  222.58   42.80
   7  -1  -5  220.48   22.10
   7  -1  -5  245.08   42.60
   7  -1  -5  204.48   48.10
   7  -1  -5  178.28   27.10
   7   1   5  224.08   43.60
  -8   1  -5   63.49   28.90
  -8   1  -5   53.89   28.00
  -8  -1   5   65.19   24.50
  -8   1  -5   54.79   30.90
  -8  -1   5   28.00   21.00
   8  -1   5   56.19   23.60
   8  -1   5   33.90   26.50
   8   1  -5   20.80   24.80
   8   1  -5   63.29   31.50
  -8   1  -4   69.59   21.70
  -8  -1   4  102.29   25.60
  -8   1  -4   27.50   23.20
  -8  -1   4   22.10   21.60
  -8  -1   4   54.29   21.50
  -8   1  -4   69.99   24.40
  -8  -1   4   20.70   15.60
   8   1  -4   47.50   19.20
   8   1  -4  101.39   27.70
   8  -1   4   40.70   21.10
   8  -1   4   40.90   20.90
  -8  -1   3    2.50   11.90
  -8   1  -3    2.70   10.90
  -8  -1   3   12.10   13.90
  -8  -1   3    3.50   11.40
  -8   1  -3    2.80   12.70
  -8   1  -3    2.70   13.80
  -8  -1   3   10.10   10.20
  -8   1  -3    0.20   10.10
  -8   1  -3   -5.20   12.60
   8  -1   3   17.10   14.50
   8  -1   3    6.00   13.30
   8   1  -3   12.50   14.70
   8  -1   3   28.70   15.20
   8  -1   3  -14.80   10.90
   8  -1   3    3.70   12.90
   8   1  -3   20.00   13.00
   8   1  -3   -8.60    8.90
  -8   1  -2 1288.87   73.29
  -8   1  -2 1302.87   74.59
  -8  -1   2 1408.26   64.69
  -8   1  -2 1321.47   65.09
  -8  -1   2 1286.77   67.59
  -8  -1   2 1256.37   70.19
  -8   1  -2 1383.86   73.89
  -8  -1   2 1339.77   67.29
  -8   1  -2 1359.76   69.99
   8  -1   2 1360.06   74.39
   8   1  -2 1290.07   70.19
   8   1  -2 1200.68   66.29
   8   1  -2 1221.28   61.59
   8  -1   2 1200.78   68.39
   8  -1   2 1149.58   64.39
   8  -1   2 1283.17   65.89
  -8   1  -1  334.77   28.50
  -8  -1   1  348.67   19.30
  -8  -1   1  322.77   17.80
  -8   1  -1  335.47   29.50
  -8  -1   1  314.87   24.60
  -8   1  -1  358.66   27.80
  -8   1  -1  354.76   20.70
  -8   1  -1  366.46   30.60
  -8   1  -1  338.87   31.70
  -8  -1   1  336.47   27.60
  -8  -1   1  351.76   25.30
   8   1  -1  326.77   27.00
   8  -1   1  357.36   27.40
   8  -1   1  345.67   24.50
   8   1  -1  358.56   18.80
   8   1  -1  376.16   25.30
   8  -1   1  354.46   21.30
   8  -1   1  373.46   30.60
  -8  -1   0  235.58   19.40
  -8  -1   0  210.28   21.50
  -8   1   0  212.68   20.90
  -8   1   0  214.28   20.50
  -8   1   0  206.78   21.70
  -8  -1   0  220.38   19.60
  -8  -1   0  213.78   20.20
  -8   1   0  250.07   20.30
   8   1   0  251.37   21.00
   8   1   0  224.88   12.40
   8  -1   0  197.58   17.10
   8   1   0  213.48   17.80
   8  -1   0  237.28   22.60
  -8   1   1  347.37   27.00
  -8   1   1  337.77   19.40
  -8  -1  -1  389.96   33.50
  -8  -1  -1  373.36   29.80
  -8  -1  -1  363.76   30.20
  -8  -1  -1  331.77   25.60
  -8  -1  -1  353.16   21.60
  -8   1   1  399.16   28.90
  -8   1   1  358.86   30.50
  -8  -1  -1  375.16   27.80
   8   1   1  341.97   28.20
   8  -1  -1  389.06   31.40
   8   1   1  360.46   23.50
   8   1   1  319.57   21.20
   8   1   1  355.56   26.10
   8  -1  -1  366.36   27.60
   8  -1  -1  326.77   17.90
  -8   1   2 1278.47   68.79
  -8  -1  -2 1234.38   70.99
  -8  -1  -2 1290.27   71.69
  -8  -1  -2 1277.17   64.99
  -8  -1  -2 1188.78   72.99
  -8   1   2 1305.37   77.09
  -8  -1  -2 1287.77   75.59
  -8  -1  -2 1277.07   67.59
  -8   1   2 1212.18   62.19
  -8   1   2 1227.48   72.59
  -8   1   2 1348.77   70.19
   8   1   2 1366.76   67.19
   8   1   2 1306.77   71.39
   8  -1  -2 1388.76   68.39
   8  -1  -2 1270.67   72.59
   8  -1  -2 1277.17   64.89
   8   1   2 1322.27   64.29
   8  -1  -2 1336.97   62.89
   8   1   2 1342.47   66.89
  -8  -1  -3   10.20   11.80
  -8   1   3   -1.00    9.50
  -8  -1  -3   -4.40   11.90
  -8  -1  -3    5.70   14.30
  -8   1   3   28.40   15.90
  -8   1   3   11.40   13.10
  -8  -1  -3   11.20   12.00
  -8   1   3    6.30   12.60
  -8  -1  -3   14.60   12.40
   8  -1  -3   -6.60   10.30
   8   1   3    2.20   13.30
   8  -1  -3   -2.20   14.60
   8   1   3   14.60   12.50
   8   1   3   -1.40   11.60
   8   1   3    3.90   12.00
   8   1   3   -2.70    9.30
   8  -1  -3   -0.80   11.30
  -8   1   4   72.79   27.10
  -8   1   4   36.70   20.20
  -8   1   4   32.60   17.50
  -8  -1  -4   37.80   23.50
  -8  -1  -4   76.79   23.60
  -8  -1  -4   21.80   19.30
  -8   1   4   73.89   25.40
  -8  -1  -4   69.69   25.10
  -8  -1  -4   49.80   23.70
   8   1   4   87.79   25.70
   8  -1  -4   60.69   27.70
   8  -1  -4   35.60   19.30
   8   1   4   31.40   17.60
  -8   1   5   39.20   22.40
  -8  -1  -5   26.60   27.50
  -8   1   5   40.10   25.20
  -8  -1  -5   69.19   26.50
  -8  -1  -5   47.50   26.30
  -8  -1  -5   62.69   25.50
   8   1   5   63.99   27.70
   8  -1  -5   32.10   33.50
   8  -1  -5   31.80   24.00
   8   1   5   66.69   28.00
  -9   1  -5   89.29   33.60
  -9  -1   5   77.29   28.80
  -9   1  -5  106.29   32.20
  -9  -1   5   86.89   28.50
  -9   1  -5  132.69   37.60
   9   1  -5  140.09   41.50
   9  -1   5   48.30   24.70
   9   1  -5   89.29   29.00
   9  -1   5  132.49   32.70
  -9  -1   4  154.98   37.30
  -9  -1   4  205.38   33.00
  -9   1  -4  178.68   33.10
  -9   1  -4  178.28   37.30
  -9   1  -4  261.27   44.50
  -9   1  -4  224.48   44.30
  -9  -1   4  200.08   32.20
   9   1  -4  209.28   38.00
   9  -1   4  200.88   38.30
   9  -1   4  181.58   33.90
   9   1  -4  213.48   32.50
  -9  -1   3   14.10   11.70
  -9   1  -3   29.80   15.40
  -9   1  -3   20.40   17.10
  -9  -1   3    0.50    9.60
  -9   1  -3    0.30   14.90
  -9   1  -3   17.50   15.10
  -9   1  -3   13.60   11.70
  -9  -1   3    1.20   13.30
  -9  -1   3    4.80   10.50
   9  -1   3   42.90   16.70
   9  -1   3   26.20   14.90
   9   1  -3   37.60   18.20
   9   1  -3   19.90   12.30
   9   1  -3   40.10   16.10
   9  -1   3   19.00   16.20
   9  -1   3   28.30   16.90
  -9   1  -2  107.49   22.80
  -9  -1   2  160.88   27.20
  -9   1  -2  147.29   28.20
  -9   1  -2  154.18   24.00
  -9   1  -2  180.38   18.90
  -9   1  -2  138.39   26.30
  -9  -1   2  168.58   23.20
  -9  -1   2  166.08   26.80
  -9  -1   2  141.39   27.70
  -9  -1   2  137.19   19.00
   9   1  -2  129.39   19.90
   9  -1   2  129.09   23.30
   9  -1   2  169.98   19.50
   9  -1   2  175.28   20.60
   9   1  -2  149.69   16.50
   9  -1   2  205.38   30.40
   9   1  -2  165.48   25.90
  -9   1  -1  684.33   45.10
  -9   1  -1  704.53   43.30
  -9   1  -1  661.53   47.70
  -9  -1   1  675.53   40.00
  -9  -1   1  679.13   43.20
  -9   1  -1  657.73   45.30
  -9  -1   1  667.63   31.50
  -9   1  -1  615.64   47.50
  -9   1  -1  669.03   32.20
   9   1  -1  671.43   42.40
   9  -1   1  626.94   37.30
   9  -1   1  682.73   45.50
   9   1  -1  706.33   39.10
   9  -1   1  659.53   41.50
  -9   1   0  297.07   27.70
  -9   1   0  299.17   24.90
  -9  -1   0  270.27   24.30
  -9  -1   0  295.77   23.50
  -9   1   0  307.67   26.10
  -9  -1   0  248.38   22.40
  -9   1   0  288.47   23.60
   9  -1   0  286.17   21.20
   9  -1   0  247.68   25.20
   9   1   0  295.07   22.10
   9   1   0  293.47   24.60
  -9  -1  -1  685.53   43.70
  -9  -1  -1  653.23   42.40
  -9  -1  -1  654.13   44.90
  -9   1   1  639.74   32.60
  -9  -1  -1  586.74   39.10
  -9  -1  -1  716.33   33.90
  -9  -1  -1  628.14   52.59
  -9   1   1  670.53   42.40
  -9   1   1  727.03   46.90
  -9   1   1  672.23   42.00
   9   1   1  689.53   40.50
   9  -1  -1  698.13   27.50
   9   1   1  655.03   33.80
   9   1   1  749.03   44.30
   9  -1  -1  693.33   45.50
   9   1   1  692.53   35.70
  -9  -1  -2  160.88   28.20
  -9   1   2  140.39   28.10
  -9   1   2  179.88   25.20
  -9  -1  -2  174.78   31.10
  -9   1   2  183.98   18.50
  -9   1   2  145.39   25.50
  -9  -1  -2  204.38   29.60
  -9  -1  -2  150.68   23.30
  -9  -1  -2  150.38   24.90
  -9   1   2  153.18   24.60
  -9  -1  -2  175.58   20.00
   9  -1  -2  173.68   27.30
   9   1   2  157.48   22.20
   9   1   2  152.28   19.80
   9   1   2  183.78   23.90
   9   1   2  154.18   23.30
   9   1   2  135.09   24.40
   9  -1  -2  133.79   20.80
   9  -1  -2  142.39   16.80
   9  -1  -2  156.38   22.90
  -9   1   3   48.10   16.10
  -9  -1  -3   16.60   15.90
  -9  -1  -3   31.40   17.00
  -9   1   3   25.40   16.30
  -9   1   3   24.00   15.20
  -9   1   3   31.80   14.70
  -9  -1  -3   32.10   14.90
  -9  -1  -3   28.00   16.80
  -9  -1  -3   26.90   17.90
   9   1   3   -5.50   10.40
   9  -1  -3    7.50   11.40
   9  -1  -3    9.00   12.20
   9   1   3   -8.80   12.80
   9   1   3   27.80   18.00
   9   1   3    1.40   13.30
   9   1   3   32.50   15.40
   9  -1  -3   10.00   15.50
  -9   1   4  230.28   42.50
  -9  -1  -4  223.98   36.70
  -9  -1  -4  186.98   38.60
  -9  -1  -4  237.58   41.90
  -9   1   4  200.68   33.50
  -9  -1  -4  178.48   39.20
  -9  -1  -4  146.49   28.90
  -9   1   4  144.99   31.20
   9  -1  -4  167.68   30.70
   9  -1  -4  210.38   47.30
   9   1   4  211.78   37.10
   9   1   4  222.18   36.00
  -9   1   5   60.59   25.30
  -9  -1  -5   83.79   29.70
  -9  -1  -5   74.09   32.40
  -9  -1  -5   71.59   33.20
  -9   1   5  125.29   33.10
   9   1   5   59.49   24.80
   9  -1  -5  100.09   37.10
   9   1   5   74.39   29.00
   9  -1  -5   39.30   27.20
 -10   1  -5   54.89   25.70
 -10   1  -5   43.20   26.10
 -10  -1   5   70.09   27.50
 -10  -1   5    5.80   21.20
  10   1  -5   52.99   28.20
  10  -1   5   23.70   22.00
  10   1  -5  -10.60   27.10
  10  -1   5   40.30   26.50
 -10  -1   4   17.20   18.00
 -10  -1   4   -6.90   22.50
 -10   1  -4   33.50   22.50
 -10  -1   4   16.80   15.60
 -10   1  -4  -10.10   17.40
 -10   1  -4  -18.20   12.90
 -10   1  -4    2.80   17.40
 -10  -1   4   35.80   19.20
  10   1  -4    8.50   20.90
  10  -1   4   18.50   18.70
  10  -1   4   14.30   20.90
  10   1  -4   15.30   21.20
 -10  -1   3  465.35   39.70
 -10  -1   3  512.15   44.10
 -10  -1   3  481.55   44.00
 -10   1  -3  440.66   45.30
 -10  -1   3  477.15   38.10
 -10   1  -3  586.34   51.49
 -10   1  -3  518.75   48.10
 -10   1  -3  447.96   39.40
  10  -1   3  480.85   40.10
  10   1  -3  415.56   42.20
  10  -1   3  399.36   42.20
  10  -1   3  399.86   40.50
  10  -1   3  499.05   46.20
  10  -1   3  427.06   42.40
 -10   1  -2  295.57   30.40
 -10  -1   2  306.17   24.40
 -10   1  -2  283.17   33.60
 -10  -1   2  279.67   28.50
 -10   1  -2  282.27   32.30
 -10  -1   2  289.87   30.40
 -10   1  -2  295.37   25.70
 -10  -1   2  290.67   28.80
 -10   1  -2  305.87   32.70
  10   1  -2  331.27   23.70
  10  -1   2  379.66   30.10
  10  -1   2  378.76   36.40
  10  -1   2  344.87   27.50
  10   1  -2  346.37   29.00
  10  -1   2  318.47   30.90
 -10   1  -1  141.89   24.20
 -10  -1   1  157.08   21.80
 -10  -1   1  135.59   22.40
 -10   1  -1  137.89   22.40
 -10   1  -1  182.18   29.20
 -10   1  -1  173.78   26.10
 -10  -1   1  143.89   12.90
 -10  -1   1  162.88   18.70
 -10   1  -1  156.08   11.40
  10  -1   1  166.58   23.60
  10   1  -1  132.19   18.50
  10  -1   1  136.39   18.00
  10   1  -1  135.19   21.50
  10  -1   1  149.99   25.10
 -10   1   0    9.20    9.40
 -10   1   0    9.30    8.90
 -10  -1   0    9.40    9.20
 -10  -1   0    8.20    7.50
 -10   1   0   40.30   13.20
 -10  -1   0    7.50    9.30
 -10   1   0   15.60    9.30
 -10  -1   0   19.00   10.00
  10   1   0   26.20    9.30
  10   1   0   27.10   11.20
  10  -1   0   25.50   12.80
  10  -1   0   20.00   12.60
 -10  -1  -1  144.49   12.30
 -10   1   1  123.09   31.80
 -10  -1  -1  176.48   24.50
 -10  -1  -1  156.28   24.80
 -10  -1  -1  153.58   21.70
 -10   1   1  159.78   22.40
 -10  -1  -1  148.19   28.00
 -10   1   1  149.79   24.90
 -10  -1  -1  140.79   22.90
 -10   1   1  138.59   13.60
  10   1   1  176.28   15.40
  10  -1  -1  150.08   23.80
  10   1   1  168.98   13.70
  10   1   1  186.98   19.90
  10   1   1  180.88   25.50
 -10  -1  -2  344.17   27.10
 -10   1   2  363.86   36.40
 -10  -1  -2  364.46   34.20
 -10  -1  -2  371.26   59.99
 -10  -1  -2  395.96   32.70
 -10   1   2  371.86   32.70
 -10  -1  -2  352.96   38.60
  10   1   2  277.77   24.70
  10  -1  -2  341.87   35.80
  10  -1  -2  321.87   26.90
  10   1   2  328.57   30.10
  10   1   2  310.77   27.90
  10   1   2  355.66   34.40
 -10  -1  -3  437.96   38.80
 -10   1   3  376.76   37.80
 -10   1   3  497.55   44.00
 -10   1   3  417.96   35.90
 -10  -1  -3  397.06   38.30
 -10  -1  -3  481.85   46.20
 -10  -1  -3  443.56   44.30
 -10   1   3  378.16   41.80
 -10  -1  -3  464.25   48.10
  10  -1  -3  480.45   36.90
  10  -1  -3  476.85   45.50
  10   1   3  516.75   45.60
  10  -1  -3  443.56   44.50
  10   1   3  523.95   43.80
 -10  -1  -4  -10.70   13.10
 -10   1   4   38.30   18.00
 -10   1   4   -3.80   18.50
 -10  -1  -4    8.30   14.10
 -10   1   4    2.90   14.40
 -10  -1  -4    3.40   14.70
 -10   1   4   31.60   22.90
 -10  -1  -4  -16.60   15.20
 -10  -1  -4   42.20   22.60
  10  -1  -4   21.90   31.60
  10  -1  -4    2.60   16.50
  10   1   4   -3.40   16.40
  10   1   4  -11.80   13.50
 -10   1   5   24.80   20.80
 -10  -1  -5   33.70   25.00
 -10   1   5   -7.50   17.90
 -10  -1  -5   33.80   23.20
  10   1   5   16.40   21.30
  10  -1  -5   17.40   28.50
  10   1   5   43.00   24.50
  10  -1  -5  -45.10   23.90
 -11  -1   5   66.69   28.00
 -11   1  -5   23.70   24.90
 -11   1  -5  -16.70   19.40
 -11  -1   5   42.80   25.60
  11  -1   5   -2.20   23.50
  11  -1   5  -20.80   17.30
  11   1  -5   30.30   31.10
 -11  -1   4  214.48   38.20
 -11  -1   4  141.09   33.10
 -11   1  -4  118.59   32.20
 -11  -1   4  127.39   28.60
 -11   1  -4  206.98   36.60
 -11   1  -4  211.98   44.20
 -11  -1   4  184.68   33.00
 -11   1  -4  199.18   39.60
  11   1  -4  180.48   35.30
  11  -1   4  111.49   28.60
  11   1  -4  189.98   32.00
  11  -1   4  189.38   35.80
 -11  -1   3   89.49   20.80
 -11   1  -3  106.39   30.40
 -11   1  -3  115.29   31.00
 -11  -1   3   95.79   24.00
 -11   1  -3   85.49   21.00
 -11  -1   3   99.69   25.40
 -11   1  -3  135.69   26.50
 -11  -1   3  120.29   21.20
  11  -1   3   43.20   20.40
  11   1  -3  102.89   19.40
  11  -1   3  138.39   28.50
  11   1  -3   54.39   22.30
  11  -1   3   91.39   26.00
  11  -1   3   61.09   18.90
  11   1  -3   58.99   17.60
 -11   1  -2  105.99   27.50
 -11   1  -2  146.19   27.10
 -11  -1   2  123.19   16.20
 -11   1  -2   83.49   23.20
 -11  -1   2  126.69   27.40
 -11  -1   2  132.29   26.10
 -11   1  -2  144.59   24.80
 -11  -1   2  120.29   21.50
 -11   1  -2  103.49   16.80
  11  -1   2  139.39   26.50
  11  -1   2  133.19   19.20
  11   1  -2   85.39   20.40
  11   1  -2  139.99   22.30
  11  -1   2  101.19   21.20
  11   1  -2  115.69   17.30
 -11   1  -1   68.19   22.40
 -11   1  -1   36.10   15.40
 -11   1  -1   48.20   16.50
 -11   1  -1   52.69   15.90
 -11  -1   1   46.80    8.90
 -11  -1   1   30.10   13.40
 -11  -1   1   41.50   13.00
  11  -1   1   66.19   19.20
  11   1  -1   67.99   13.60
  11   1  -1   85.29   19.30
  11  -1   1   83.09   14.50
 -11  -1   0  734.13   46.70
 -11  -1   0  679.23   44.00
 -11  -1   0  734.43   44.20
 -11  -1   0  655.23   41.90
 -11   1   0  731.23   47.30
 -11   1   0  734.93   44.00
 -11   1   0  651.43   44.00
 -11   1   0  673.03   48.10
  11   1   0  724.53   41.60
  11  -1   0  691.63   47.50
  11  -1   0  725.63   39.60
  11  -1   0  653.33   43.00
 -11  -1  -1  125.09   22.40
 -11   1   1   84.39   18.40
 -11  -1  -1   72.99   16.30
 -11   1   1   96.79   20.30
 -11   1   1   70.99   11.50
 -11  -1  -1   79.59   23.40
 -11  -1  -1   84.09    8.00
 -11  -1  -1   91.09   18.90
 -11   1   1   83.59   18.00
  11   1   1   70.19   16.90
  11  -1  -1   42.50   11.30
  11   1   1   56.09    8.50
  11   1   1   40.20   12.50
  11  -1  -1   57.59   14.10
  11   1   1   56.99    9.20
 -11  -1  -2  135.39   19.50
 -11  -1  -2  138.89   26.50
 -11  -1  -2   84.19   24.90
 -11   1   2  118.19   24.20
 -11   1   2  122.19   22.30
 -11   1   2   79.29   21.80
 -11  -1  -2  120.79   25.30
 -11  -1  -2  130.89   22.80
  11   1   2  134.39   25.70
  11  -1  -2  101.59   22.60
  11   1   2  129.39   18.90
  11  -1  -2  148.19   14.60
  11   1   2  109.19   17.00
 -11  -1  -3   69.49   21.30
 -11  -1  -3  118.49   29.90
 -11  -1  -3   62.09   22.60
 -11  -1  -3   83.69   21.00
 -11   1   3   85.09   23.70
 -11  -1  -3   99.39   28.90
 -11   1   3   77.19   22.40
 -11   1   3   80.19   23.60
 -11   1   3  103.19   22.20
  11  -1  -3  112.89   29.70
  11  -1  -3  111.69   20.60
  11   1   3  118.89   23.30
  11   1   3  148.59   24.40
  11  -1  -3  123.89   23.70
  11   1   3  110.89   31.00
  11   1   3  100.29   24.00
 -11  -1  -4  213.78   43.90
 -11   1   4  205.68   42.20
 -11  -1  -4  181.78   38.60
 -11  -1  -4  222.68   37.50
 -11  -1  -4  209.88   34.00
 -11  -1  -4  165.88   37.80
 -11   1   4  129.29   26.60
 -11   1   4  182.78   32.00
  11  -1  -4  149.79   30.40
  11   1   4  215.68   35.80
  11   1   4  150.58   31.70
 -11   1   5   -3.00   20.70
 -11  -1  -5   23.40   23.90
 -11  -1  -5   22.60   26.70
 -11  -1  -5   81.39   29.10
  11  -1  -5   27.20   39.10
  11   1   5   -7.00   20.90
  11   1   5  -16.80   23.70
 -12  -1   4   -1.50   17.20
 -12  -1   4   19.10   20.00
 -12   1  -4  -11.10   24.20
 -12   1  -4  -24.50   17.60
 -12  -1   4   23.20   18.20
 -12   1  -4  -15.30   17.00
 -12  -1   4   27.80   32.30
  12  -1   4    8.80   20.10
  12  -1   4   48.10   21.70
  12   1  -4   52.79   27.90
 -12   1  -3   58.89   27.20
 -12   1  -3   73.59   19.60
 -12  -1   3   78.39   23.40
 -12   1  -3   76.99   25.80
 -12  -1   3   51.99   18.00
 -12   1  -3   65.49   19.80
 -12  -1   3   77.49   22.20
 -12   1  -3   55.99   23.60
  12   1  -3   59.09   21.70
  12  -1   3  105.79   28.80
  12   1  -3   58.09   17.90
  12  -1   3   93.59   25.10
  12   1  -3   81.59   19.30
  12  -1   3   94.19   24.60
  12  -1   3   63.09   20.00
  12  -1   3   50.09   18.80
 -12   1  -2  429.46   47.00
 -12  -1   2  441.96   40.30
 -12   1  -2  486.85   29.90
 -12  -1   2  411.96   37.70
 -12   1  -2  498.05   43.80
 -12   1  -2  424.06   41.70
 -12  -1   2  467.95   38.30
 -12   1  -2  391.96   36.30
  12  -1   2  373.26   39.40
  12   1  -2  393.66   23.90
  12   1  -2  384.26   37.70
  12   1  -2  369.86   32.80
  12  -1   2  358.56   30.90
 -12   1  -1  276.17   32.20
 -12   1  -1  253.37   30.00
 -12   1  -1  254.97   28.40
 -12  -1   1  275.37   19.30
 -12  -1   1  280.87   28.10
 -12  -1   1  256.07   28.50
 -12   1  -1  254.17   39.10
 -12   1  -1  296.77   33.20
 -12  -1   1  273.47   26.50
  12  -1   1  283.07   22.90
  12   1  -1  284.67   28.60
  12  -1   1  285.57   32.10
  12   1  -1  290.37   25.80
 -12   1   0   14.20   10.70
 -12   1   0    7.10   11.70
 -12  -1   0   29.20   11.40
 -12  -1   0   21.10   11.80
 -12  -1   0   -5.50    9.90
 -12   1   0   19.50   13.90
 -12  -1   0   -6.10   10.10
  12  -1   0   17.70   11.40
  12   1   0  -10.90   10.10
  12   1   0    3.90    8.20
  12  -1   0   24.10   14.20
  12  -1   0   25.70    8.60
 -12   1   1  323.17   32.70
 -12   1   1  283.57   28.90
 -12  -1  -1  329.07   32.60
 -12   1   1  293.57   50.49
 -12  -1  -1  300.17   28.50
 -12  -1  -1  284.37   41.10
 -12  -1  -1  268.37   31.00
 -12  -1  -1  304.07   30.80
 -12   1   1  272.57   20.80
  12  -1  -1  236.88   19.20
  12   1   1  248.58   29.00
  12   1   1  274.37   26.80
  12  -1  -1  274.37   27.00
  12  -1  -1  284.97   31.80
 -12  -1  -2  336.07   27.50
 -12   1   2  356.36   34.90
 -12  -1  -2  369.66   39.20
 -12  -1  -2  344.97   38.00
 -12   1   2  392.86   41.30
 -12   1   2  360.86   37.10
 -12  -1  -2  359.96   43.40
 -12  -1  -2  370.36   34.80
  12   1   2  461.35   30.40
  12  -1  -2  471.75   42.20
  12  -1  -2  433.36   36.70
  12  -1  -2  441.06   23.50
  12   1   2  491.75   31.50
  12   1   2  510.55   42.50
 -12   1   3   67.69   21.30
 -12  -1  -3   61.89   25.90
 -12  -1  -3   41.70   20.90
 -12   1   3   46.60   23.00
 -12  -1  -3   61.19   18.50
 -12   1   3   71.69   25.20
 -12  -1  -3   81.79   21.60
  12   1   3   68.09   18.30
  12   1   3   61.19   21.90
  12  -1  -3   80.99   24.80
  12   1   3   40.00   16.90
  12  -1  -3   16.50   20.80
  12   1   3   62.19   19.60
 -12  -1  -4   -1.80   24.90
 -12  -1  -4    1.10   20.10
 -12  -1  -4   38.90   24.10
 -12   1   4   57.59   27.90
 -12  -1  -4   16.50   20.80
 -12   1   4   26.60   20.70
 -12   1   4   38.20   17.10
 -12  -1  -4   52.29   27.50
  12  -1  -4   41.40   22.30
  12   1   4   27.10   19.10
 -13   1  -4   34.80   25.80
 -13   1  -4   48.60   30.10
 -13  -1   4   39.40   25.20
 -13  -1   4   68.79   21.70
  13   1  -4   62.19   38.30
  13  -1   4   42.60   23.30
  13  -1   4   15.90   21.40
 -13  -1   3   46.60   21.80
 -13   1  -3   19.50   17.20
 -13   1  -3   24.70   17.70
 -13   1  -3   15.90   20.80
 -13   1  -3   61.59   23.40
 -13   1  -3   39.20   16.70
 -13  -1   3   27.80   15.30
 -13  -1   3   13.90   17.90
  13   1  -3    9.30   13.40
  13   1  -3   14.90   16.50
  13  -1   3   27.00   18.70
  13  -1   3   14.50   17.40
  13   1  -3   11.30   17.40
  13  -1   3   17.20   16.10
 -13  -1   2   22.40   15.00
 -13   1  -2   16.80    9.50
 -13   1  -2  -10.90   11.10
 -13   1  -2    3.40   16.10
 -13  -1   2   32.60   16.10
 -13   1  -2   23.50   18.30
 -13  -1   2   23.70   14.80
 -13   1  -2   29.90   20.70
  13  -1   2   41.70   14.50
  13   1  -2   25.70   11.90
  13  -1   2    0.90   12.60
  13  -1   2    9.40   15.00
  13   1  -2   -2.40   14.00
 -13  -1   1  148.59   25.50
 -13   1  -1  215.08   29.50
 -13   1  -1  160.38   30.20
 -13  -1   1  214.48   24.50
 -13   1  -1  221.28   32.10
 -13   1  -1  184.38   31.00
 -13   1  -1  174.48   34.00
 -13  -1   1  203.88   17.20
  13  -1   1  184.98   30.70
  13  -1   1  183.78   35.00
  13   1  -1  194.28   28.10
  13   1  -1  211.78   22.30
 -13   1   0  156.08   23.60
 -13  -1   0  189.78   25.50
 -13  -1   0  140.99   26.40
 -13  -1   0  157.98   25.10
 -13  -1   0  152.88   22.40
 -13   1   0  149.39   27.80
 -13   1   0  135.09   22.10
  13  -1   0  189.38   29.80
  13  -1   0  137.99   13.10
  13   1   0  181.68   27.00
  13   1   0  164.88   22.70
  13  -1   0  162.48   23.50
 -13  -1  -1  236.58   33.00
 -13  -1  -1  222.78   31.30
 -13   1   1  220.38   31.50
 -13   1   1  248.28   27.70
 -13  -1  -1  195.88   36.10
 -13  -1  -1  183.28   30.70
  13   1   1  166.68   27.90
  13  -1  -1  159.78   24.50
  13   1   1  189.18   26.10
  13  -1  -1  208.28   31.20
 -13   1   2   37.40   18.50
 -13  -1  -2   17.30    9.20
 -13   1   2    6.40   13.70
 -13   1   2   30.00   16.10
 -13  -1  -2    8.80   12.50
 -13  -1  -2  -11.20   10.20
 -13  -1  -2   -4.10   15.00
 -13  -1  -2  -13.20   15.20
  13  -1  -2    5.20   14.00
  13   1   2   18.10    8.90
  13   1   2  -14.20   13.10
  13   1   2   13.00   10.70
  13  -1  -2   25.70   13.60
 -13  -1  -3   24.20   14.80
 -13  -1  -3   52.29   21.30
 -13   1   3   43.90   18.70
 -13  -1  -3    4.00   17.80
 -13  -1  -3    7.20   16.90
 -13  -1  -3   15.70   13.30
 -13   1   3   24.40   22.80
  13  -1  -3   26.00   13.40
  13  -1  -3   40.20   21.10
  13   1   3   19.40   16.70
  13   1   3   49.99   28.40
  13   1   3   12.20   15.00
  13   1   3   20.30   14.20
 -13   1   4   26.50   21.90
 -13  -1  -4   58.99   23.00
 -13  -1  -4   68.29   31.80
 -13  -1  -4   19.80   27.00
 -13  -1  -4   23.60   23.30
  13  -1  -4   21.60   33.50
  13   1   4   10.70   19.60
 -14   1  -4   35.20   26.80
 -14  -1   4   34.00   22.90
  14  -1   4   -1.90   20.90
 -14  -1   3   85.59   24.70
 -14   1  -3   47.10   26.00
 -14   1  -3  117.29   26.40
 -14  -1   3   70.39   24.60
 -14  -1   3   85.19   21.50
 -14   1  -3  116.69   32.50
 -14   1  -3   73.19   29.90
  14  -1   3  108.69   23.50
  14   1  -3   88.29   25.60
  14  -1   3   76.79   23.30
  14   1  -3  115.29   17.80
  14  -1   3   92.29   26.00
  14  -1   3   76.89   25.00
  14   1  -3   94.89   24.30
 -14   1  -2  116.29   23.10
 -14   1  -2  120.89   31.90
 -14   1  -2  127.39   28.50
 -14  -1   2  109.49   23.00
 -14  -1   2  154.48   27.40
 -14   1  -2  161.18   15.80
 -14  -1   2  134.29   26.40
  14  -1   2  114.39   27.90
  14   1  -2  169.98   28.10
  14  -1   2  121.89   24.60
  14  -1   2  133.49   27.30
  14  -1   2  149.59   20.70
  14   1  -2  160.98   23.60
 -14   1  -1  215.98   34.30
 -14   1  -1  270.77   39.20
 -14  -1   1  231.68   32.70
 -14  -1   1  241.28   33.30
 -14   1  -1  233.48   32.40
 -14   1  -1  158.48   35.20
 -14  -1   1  206.08   28.60
 -14  -1   1  256.87   25.60
  14  -1   1  222.68   18.70
  14  -1   1  220.78   19.40
  14  -1   1  279.17   29.40
  14   1  -1  244.78   29.10
  14   1  -1  251.37   27.30
  14  -1   1  235.48   35.80
 -14  -1   0    8.70    9.60
 -14  -1   0   58.49   22.00
 -14  -1   0    4.70   12.40
 -14   1   0   19.10   14.80
 -14  -1   0   27.40   15.30
 -14   1   0  -19.00   11.00
 -14   1   0   18.10   12.60
 -14  -1   0   16.40   13.60
 -14   1   0    9.90   14.10
  14  -1   0   -3.30   10.20
  14  -1   0  -11.20   11.20
  14   1   0   -2.70    8.90
 -14  -1  -1  237.68   41.50
 -14   1   1  192.98   30.90
 -14  -1  -1  198.58   32.30
 -14   1   1  255.77   39.70
 -14  -1  -1  192.78   28.70
 -14   1   1  184.28   29.00
 -14  -1  -1  228.78   34.00
  14   1   1  215.08   28.90
  14   1   1  279.27   31.20
  14  -1  -1  207.88   33.20
  14  -1  -1  253.17   27.80
 -14   1   2   93.89   24.50
 -14  -1  -2  145.19   30.60
 -14  -1  -2   95.59   21.50
 -14   1   2  156.28   26.30
 -14  -1  -2  127.09   29.00
 -14   1   2  111.59   27.70
 -14  -1  -2   97.59   31.30
  14  -1  -2  145.99   29.50
  14   1   2  136.49   29.00
  14  -1  -2  117.99   22.70
  14   1   2  132.69   24.60
 -14  -1  -3   90.49   28.70
 -14   1   3   86.99   25.30
 -14  -1  -3   41.70   25.70
 -14  -1  -3  121.19   26.40
 -14   1   3  160.48   32.30
 -14  -1  -3   66.79   27.80
 -14   1   3   76.89   29.40
  14   1   3  114.99   29.60
  14   1   3  112.89   27.10
  14   1   3  105.59   18.30
  14  -1  -3   65.59   24.30
  14   1   3   49.90   20.60
  14  -1  -3  123.29   17.50
  14  -1  -3   92.19   27.60
 -14  -1  -4  -13.70   22.70
 -14  -1  -4   12.40   23.10
 -14  -1  -4   13.80   22.40
 -14  -1  -4    3.10   17.60
 -14   1   4   17.10   25.60
  14  -1  -4  -11.90   33.40
  14   1   4   -2.20   20.00
 -15  -1   3   31.10   21.30
 -15   1  -3   50.79   28.00
 -15   1  -3   46.50   26.40
 -15  -1   3    0.40   22.10
  15  -1   3   54.39   26.00
  15  -1   3   34.40   24.00
  15   1  -3  -12.10   22.90
 -15   1  -2   31.20   21.60
 -15  -1   2  -23.60   15.20
 -15   1  -2   -1.60   16.50
 -15  -1   2    8.60   17.00
 -15   1  -2    6.50   16.40
 -15   1  -2   29.30   21.50
 -15  -1   2   17.60   14.60
  15  -1   2    9.40   13.60
  15  -1   2    9.60   19.90
  15   1  -2  -16.10   14.60
  15   1  -2    2.00   17.00
  15  -1   2   -1.30   10.60
 -15  -1   1   42.60   17.70
 -15   1  -1   40.90   18.50
 -15   1  -1   97.19   25.80
 -15   1  -1   69.49   23.00
 -15   1  -1   57.09   25.60
 -15  -1   1   67.99   18.00
  15   1  -1   44.10   17.40
  15  -1   1   33.10   16.00
  15  -1   1   60.39   20.70
  15   1  -1   69.19   16.80
 -15   1   0  176.98   30.90
 -15   1   0  195.38   36.60
 -15  -1   0  241.68   34.70
 -15  -1   0  179.98   38.40
 -15  -1   0  167.08   26.20
 -15  -1   0  178.68   29.70
 -15   1   0  153.18   30.30
 -15   1   0  146.09   35.20
  15   1   0  241.78   29.00
  15  -1   0  235.18   27.40
  15  -1   0  206.18   31.40
 -15   1   1  100.99   24.70
 -15  -1  -1   78.09   22.40
 -15  -1  -1   29.60   20.20
 -15  -1  -1   68.09   17.90
 -15  -1  -1   90.49   27.70
 -15   1   1   61.49   23.00
  15  -1  -1   59.49   20.60
  15   1   1   82.69   18.70
  15  -1  -1   53.59   17.00
  15   1   1   72.19   20.90
 -15  -1  -2    9.90   17.10
 -15  -1  -2  -30.00   14.50
 -15  -1  -2   -6.40   19.10
 -15   1   2   -6.70   15.30
 -15  -1  -2    4.00   13.40
 -15   1   2   -1.10   18.70
  15  -1  -2  -26.20   14.90
  15   1   2   -0.60   14.90
  15   1   2   33.90   16.80
  15  -1  -2   -4.90   13.80
 -15   1   3   54.09   23.90
 -15  -1  -3   13.50   23.90
 -15  -1  -3  101.29   33.20
  15   1   3   72.39   28.50
  15  -1  -3   72.29   30.00
 -16  -1   3   22.60   23.50
 -16   1  -3   52.59   29.30
 -16   1  -3   25.70   23.00
  16  -1   3   56.09   27.50
 -16   1  -2   26.20   23.00
 -16   1  -2   72.19   26.20
 -16  -1   2   49.70   18.30
 -16  -1   2   38.80   20.60
  16   1  -2   32.80   21.50
  16  -1   2   66.29   39.30
  16  -1   2   36.30   19.90
 -16  -1   1   71.89   24.00
 -16   1  -1   67.99   21.10
 -16   1  -1   71.49   25.90
 -16  -1   1   10.30   16.70
 -16   1  -1   70.99   24.30
 -16  -1   1   57.09   17.60
 -16   1  -1   42.00   21.00
  16   1  -1   57.29   17.90
  16   1  -1   73.19   21.00
  16  -1   1   32.00   19.60
  16  -1   1   47.40   22.10
 -16  -1   0    0.20   16.70
 -16  -1   0   10.10   14.20
 -16  -1   0   14.80   13.90
 -16   1   0    8.60   17.70
 -16  -1   0    3.10   16.40
 -16  -1   0    1.50   17.30
 -16   1   0    6.40   17.30
 -16   1   0   34.90   23.90
 -16   1   0    6.50   17.20
 -16   1   0    5.60   15.80
  16  -1   0  -17.50   16.10
  16  -1   0    2.90   14.00
  16   1   0   21.10   13.40
  16   1   0   26.30   15.60
 -16  -1  -1   69.09   22.30
 -16  -1  -1   79.49   20.40
 -16   1   1    9.90   19.50
 -16   1   1   56.89   20.50
 -16  -1  -1   54.59   21.90
 -16  -1  -1   49.99   24.50
  16  -1  -1   54.69   22.40
  16   1   1   29.70   22.30
  16   1   1   56.99   20.20
  16  -1  -1    9.00   16.90
 -16  -1  -2   53.29   24.00
 -16  -1  -2   -0.20   14.90
 -16   1   2   25.40   19.30
 -16   1   2   38.60   19.00
  16   1   2   19.40   21.20
  16  -1  -2   21.10   26.70
  16   1   2   32.70   21.70
  16  -1  -2   39.90   24.40
 -16  -1  -3   29.70   27.40
 -16   1   3   34.60   25.50
 -16  -1  -3  121.49   33.80
  16  -1  -3   30.10   31.00
  16   1   3   83.09   31.30
 -17  -1   2   -5.70   17.00
 -17   1  -2   -0.20   19.60
 -17   1  -2    4.50   21.60
  17  -1   2   60.99   28.00
 -17   1  -1   48.40   23.90
 -17  -1   1   39.40   21.50
 -17   1  -1   40.40   22.90
  17   1  -1   17.70   18.60
  17  -1   1   36.90   23.40
 -17   1   0   44.10   19.90
 -17   1   0   21.60   16.10
 -17  -1   0   14.30   15.90
 -17   1   0  -11.60   19.00
 -17  -1   0   29.00   19.40
  17  -1   0   63.39   24.10
  17   1   0   22.30   18.30
  17  -1   0   28.10   25.80
 -17   1   1   13.30   18.10
 -17   1   1   73.79   24.20
 -17  -1  -1   41.30   17.30
 -17  -1  -1   16.50   22.20
 -17  -1  -1   66.39   20.80
  17   1   1   48.10   23.00
  17  -1  -1   34.40   23.70
 -17  -1  -2   33.70   24.10
 -17  -1  -2   35.80   23.10
 -17   1   2   34.80   21.20
  17   1   2    1.30   23.10
  17  -1  -2   26.50   30.10
 -18  -1   1   27.40   18.50
 -18   1  -1   11.20   19.40
 -18   1  -1   42.50   25.20
 -18  -1   0   19.20   20.20
 -18   1   0  -24.20   20.50
 -18  -1   0   12.30   24.20
 -18   1   0    4.70   20.40
 -18  -1  -1  -12.40   19.70
 -18  -1  -1  -33.50   18.40
 -18   1   1  -23.70   17.40
   0  -2   6   77.79   35.00
   0  -2   6   77.69   37.60
   0   2  -6   70.89   33.50
   0   2  -6   20.60   28.10
   0   2  -6    9.60   29.50
   0   2  -5  197.08   44.10
   0  -2   5  240.28   43.10
   0   2  -5  246.98   41.10
   0  -2   5  214.98   40.00
   0   2  -5  252.87   47.90
   0   2  -4  168.68   30.60
   0   2  -4  189.28   31.50
   0  -2   4  183.48   30.50
   0  -2   4  187.68   33.60
   0   2  -4  178.18   28.30
   0  -2   4  244.88   37.70
   0   2  -4  183.98   35.40
   0   2  -4  216.28   33.60
   0  -2   3  957.80   60.09
   0  -2   3  954.90   56.69
   0  -2   3 1006.70   60.89
   0   2  -3  972.10   56.09
   0   2  -3 1023.50   65.49
   0   2  -3  982.20   59.39
   0  -2   3  965.40   59.49
   0   2  -3 1079.99   58.99
   0   2  -3 1021.30   59.19
   0   2  -3 1055.79   61.39
   0   2  -3 1005.40   59.19
   0  -2   2   83.99   15.40
   0   2  -2  117.59   18.00
   0  -2   2   98.49   16.50
   0  -2   2  110.29   17.80
   0   2  -2   90.39   18.50
   0  -2   2   92.59   16.80
   0   2  -2   90.69   15.70
   0   2  -2  104.29   17.40
   0   2  -2   84.49   16.20
   0   2  -2  110.39   16.60
   0   2  -2   92.89   15.40
   0  -2   1   27.70    6.00
   0  -2   1   15.00    6.90
   0  -2   1   15.30    6.70
   0   2  -1   20.00    6.60
   0   2  -1   25.60    6.60
   0  -2   1   26.30    7.50
   0  -2   1   17.30    6.20
   0  -2   1   16.70    7.50
   0   2  -1   16.70    5.90
   0   2  -1   27.10    7.00
   0   2  -1   10.80    6.10
   0   2  -1   24.80    7.50
   0   2   0 1276.67   47.90
   0  -2   0 1288.27   47.20
   0   2   0 1269.37   50.99
   0  -2   0 1231.08   49.60
   0   2   0 1181.18   47.30
   0  -2   0 1265.77   48.90
   0   2   0 1169.38   50.49
   0   2   0 1130.19   49.30
   0  -2  -1   26.90    7.60
   0  -2  -1   17.60    7.40
   0   2   1   27.60    8.70
   0  -2  -1   19.90    7.10
   0   2   1   17.20    7.30
   0   2   1   14.60    6.80
   0   2   1   17.20    6.70
   0  -2  -1   24.90    9.00
   0  -2  -1   17.10    6.90
   0   2   1   29.60    7.20
   0  -2  -2   88.79   16.80
   0   2   2   96.09   17.00
   0  -2  -2  119.89   18.80
   0   2   2  109.79   19.80
   0  -2  -2   82.49   17.90
   0   2   2  131.19   19.50
   0  -2  -2  108.49   18.10
   0   2   2  114.29   19.10
   0  -2  -2  136.89   18.70
   0  -2  -3 1009.70   59.39
   0  -2  -3 1029.20   60.59
   0  -2  -3 1082.59   63.99
   0   2   3  969.90   59.89
   0  -2  -3  940.01   64.29
   0   2   3 1106.79   62.99
   0  -2  -3 1071.39   59.19
   0   2   3  992.60   60.79
   0   2   3  983.70   61.59
   0  -2  -3 1081.29   62.79
   0  -2  -3  941.31   59.39
   0  -2  -4  251.47   39.30
   0  -2  -4  234.78   40.00
   0   2   4  199.18   34.70
   0   2   4  208.28   34.80
   0  -2  -4  197.38   32.30
   0  -2  -4  223.68   35.50
   0  -2  -5  194.88   40.60
   0  -2  -5  199.78   38.50
   0   2   5  186.88   37.20
   0   2   5  261.27   44.30
   0  -2  -6   79.99   34.00
   0  -2  -6   54.09   35.40
   0   2   6  108.09   41.00
   0   2   6   81.49   34.30
   0  -2  -6   60.39   35.20
  -1  -2   6   89.19   38.30
  -1   2  -6  133.39   36.70
  -1   2  -6  168.38   48.00
  -1   2  -6   83.29   34.60
   1  -2   6  108.79   41.10
   1   2  -6   49.60   32.80
   1   2  -6  119.29   37.00
   1   2  -6  148.19   43.80
  -1  -2   5   95.69   30.30
  -1   2  -5   94.59   35.20
  -1  -2   5   88.49   27.50
  -1   2  -5   97.79   30.50
  -1   2  -5   49.80   23.10
   1   2  -5  102.09   34.00
   1  -2   5  111.49   31.00
   1  -2   5  123.69   32.60
   1   2  -5  136.89   33.10
   1   2  -5  131.29   31.50
  -1  -2   4   37.50   16.90
  -1  -2   4   57.49   21.60
  -1  -2   4   46.40   19.70
  -1   2  -4   27.20   17.70
  -1   2  -4   40.90   18.10
  -1   2  -4   57.89   21.00
  -1   2  -4   40.70   21.50
   1  -2   4   10.30   16.80
   1   2  -4    8.50   19.20
   1  -2   4   45.90   19.50
   1   2  -4   46.70   20.10
   1  -2   4   40.50   16.50
   1   2  -4   22.50   13.60
   1   2  -4   21.70   14.30
   1   2  -4   61.29   20.40
  -1   2  -3  477.85   48.20
  -1   2  -3  452.15   37.10
  -1   2  -3  491.55   38.40
  -1   2  -3  443.36   37.20
  -1  -2   3  498.95   36.80
  -1   2  -3  488.55   36.70
  -1   2  -3  441.46   38.30
  -1  -2   3  440.76   38.70
  -1  -2   3  465.85   37.60
  -1   2  -3  432.86   36.10
  -1  -2   3  558.54   41.00
   1   2  -3  486.45   38.10
   1   2  -3  560.74   38.90
   1  -2   3  507.45   40.80
   1   2  -3  544.85   39.50
   1   2  -3  525.85   43.40
   1  -2   3  610.74   39.70
   1  -2   3  534.75   41.40
   1   2  -3  564.74   36.50
   1   2  -3  536.35   40.20
   1  -2   3  538.15   39.90
   1   2  -3  529.75   39.50
  -1   2  -2  845.92   45.10
  -1   2  -2  880.31   46.90
  -1   2  -2  916.91   47.60
  -1   2  -2  850.61   44.60
  -1  -2   2  895.11   44.80
  -1   2  -2  846.42   45.20
  -1  -2   2  824.42   46.10
  -1  -2   2  817.42   42.80
  -1  -2   2  787.12   44.60
  -1   2  -2  888.21   48.10
   1   2  -2  785.32   44.10
   1   2  -2  716.63   43.10
   1  -2   2  760.72   45.10
   1  -2   2  739.33   44.80
   1   2  -2  793.52   41.60
   1   2  -2  718.73   47.00
   1  -2   2  785.42   45.20
   1   2  -2  811.32   44.00
   1   2  -2  796.12   45.20
   1  -2   2  789.72   43.20
   1  -2   2  767.22   44.50
   1   2  -2  791.62   45.40
   1  -2   2  770.12   45.80
  -1   2  -1 1227.78   54.69
  -1   2  -1 1130.69   52.89
  -1   2  -1 1196.88   55.19
  -1   2  -1 1184.78   55.29
  -1  -2   1 1203.58   54.99
  -1  -2   1 1187.68   52.19
  -1   2  -1 1258.87   56.09
  -1  -2   1 1194.88   52.99
  -1   2  -1 1153.88   55.69
   1  -2   1 1288.37   56.39
   1  -2   1 1233.48   56.59
   1  -2   1 1265.87   55.99
   1   2  -1 1300.87   56.79
   1  -2   1 1283.17   53.39
   1   2  -1 1294.57   54.09
   1   2  -1 1294.37   53.69
   1   2  -1 1331.67   52.59
   1  -2   1 1288.67   56.09
   1   2  -1 1289.47   54.69
   1   2  -1 1294.27   55.69
   1   2  -1 1340.87   54.09
   1  -2   1 1275.47   55.19
  -1  -2   0  439.56   19.30
  -1  -2   0  456.85   21.80
  -1   2   0  436.06   21.00
  -1   2   0  434.06   22.10
  -1   2   0  447.76   20.90
  -1  -2   0  433.46   17.50
  -1   2   0  450.05   20.70
  -1  -2   0  437.06   17.80
   1  -2   0  453.95   21.00
   1  -2   0  449.16   20.90
   1   2   0  444.66   17.40
   1   2   0  445.46   19.40
   1   2   0  427.46   17.70
   1  -2   0  446.86   22.30
  -1   2   1 1296.37   56.59
  -1   2   1 1388.16   56.09
  -1  -2  -1 1289.27   54.69
  -1   2   1 1277.97   55.29
  -1  -2  -1 1250.27   55.99
  -1   2   1 1247.08   55.29
  -1  -2  -1 1226.88   54.59
  -1   2   1 1241.78   57.49
  -1  -2  -1 1279.17   57.09
  -1  -2  -1 1320.57   56.19
   1   2   1 1254.17   56.89
   1  -2  -1 1151.78   54.29
   1  -2  -1 1264.77   57.09
   1   2   1 1193.98   54.09
   1   2   1 1220.58   55.59
   1  -2  -1 1191.28   55.09
   1   2   1 1177.18   53.99
   1  -2  -1 1212.78   54.99
   1  -2  -1 1204.58   57.49
   1   2   1 1181.18   55.39
   1   2   1 1179.28   54.09
  -1   2   2  829.02   46.00
  -1  -2  -2  738.33   48.40
  -1  -2  -2  784.52   45.50
  -1   2   2  861.51   49.99
  -1  -2  -2  793.62   46.10
  -1  -2  -2  753.82   46.60
  -1   2   2  743.13   45.70
  -1   2   2  785.82   46.60
  -1   2   2  799.82   47.00
  -1  -2  -2  806.82   46.30
  -1  -2  -2  747.73   44.40
   1  -2  -2  876.51   47.00
   1   2   2  863.31   47.60
   1  -2  -2  878.11   47.00
   1  -2  -2  829.72   48.50
   1  -2  -2  871.91   50.49
   1   2   2  872.41   47.00
   1  -2  -2  909.11   48.30
   1   2   2  875.41   50.79
   1   2   2  857.81   47.40
   1   2   2  866.91   47.00
  -1  -2  -3  549.25   42.50
  -1  -2  -3  544.55   39.60
  -1  -2  -3  538.15   39.10
  -1  -2  -3  532.45   41.00
  -1   2   3  503.75   40.70
  -1  -2  -3  577.24   40.70
  -1   2   3  564.44   45.50
  -1   2   3  523.85   39.20
  -1   2   3  560.34   41.90
  -1  -2  -3  571.24   45.70
  -1   2   3  531.15   39.90
  -1  -2  -3  568.64   41.10
   1   2   3  473.75   38.70
   1  -2  -3  458.05   38.20
   1   2   3  489.65   39.40
   1  -2  -3  488.85   41.20
   1   2   3  447.06   38.50
   1  -2  -3  480.05   38.40
   1   2   3  459.75   39.60
   1  -2  -3  513.75   36.20
  -1  -2  -4   58.19   20.30
  -1  -2  -4   17.30   14.60
  -1   2   4   16.00   16.10
  -1  -2  -4   29.70   16.70
  -1  -2  -4    8.20   16.70
  -1  -2  -4   54.89   23.60
  -1   2   4   23.90   17.10
   1   2   4   59.49   20.10
   1  -2  -4   39.80   21.10
   1  -2  -4   66.59   19.50
   1  -2  -4   28.30   18.10
   1   2   4   95.29   25.60
   1  -2  -4   49.90   20.00
  -1  -2  -5  121.89   33.20
  -1  -2  -5  143.99   38.90
  -1  -2  -5  119.19   34.50
  -1   2   5  157.88   34.10
  -1   2   5  143.29   34.60
   1  -2  -5   66.59   25.20
   1   2   5  108.49   31.50
   1  -2  -5  101.79   31.40
   1   2   5   98.19   30.20
   1  -2  -5  114.49   39.50
  -1  -2  -6  125.39   37.30
  -1   2   6  138.49   44.40
  -1   2   6  143.59   45.20
  -1  -2  -6   85.89   36.10
  -1  -2  -6  108.19   40.60
   1  -2  -6  175.88   48.20
   1   2   6  131.89   44.60
   1   2   6  145.19   38.80
   1  -2  -6  134.59   43.40
   1  -2  -6  101.29   37.70
  -2   2  -6   83.89   32.60
  -2  -2   6   32.40   30.30
  -2   2  -6   40.30   33.10
  -2   2  -6  -10.80   22.90
   2   2  -6    7.70   29.80
   2   2  -6   70.49   37.60
   2   2  -6    3.90   24.80
  -2   2  -5  203.68   39.50
  -2  -2   5  194.38   40.10
  -2  -2   5  182.68   36.60
  -2   2  -5  211.98   39.00
   2   2  -5  205.28   36.70
   2  -2   5  251.17   43.90
   2   2  -5  213.28   48.60
   2  -2   5  294.27   46.90
   2   2  -5  241.48   43.10
  -2  -2   4  682.03   55.09
  -2   2  -4  618.24   50.79
  -2  -2   4  725.73   55.49
  -2   2  -4  688.63   53.49
  -2   2  -4  707.13   59.09
  -2   2  -4  668.33   53.19
  -2  -2   4  567.14   49.00
  -2   2  -4  667.43   59.29
   2  -2   4  669.33   50.99
   2   2  -4  636.14   45.20
   2  -2   4  656.43   55.39
   2  -2   4  701.93   55.29
   2   2  -4  683.23   54.49
   2   2  -4  668.63   58.29
   2   2  -4  717.83   53.49
  -2   2  -3  172.58   27.60
  -2   2  -3  163.28   26.70
  -2  -2   3  151.58   25.80
  -2  -2   3  182.68   26.90
  -2   2  -3  140.99   24.40
  -2  -2   3  152.08   25.80
  -2  -2   3  173.28   25.00
  -2   2  -3  127.49   22.00
  -2   2  -3  160.38   29.80
  -2   2  -3  211.18   23.60
   2   2  -3  180.58   21.90
   2  -2   3  212.38   30.40
   2  -2   3  200.98   29.80
   2  -2   3  216.88   25.20
   2   2  -3  192.08   27.70
   2  -2   3  223.98   29.00
   2   2  -3  180.98   29.80
   2   2  -3  209.18   23.50
   2   2  -3  163.68   24.10
   2   2  -3  215.38   24.90
   2   2  -3  155.68   18.70
  -2  -2   2  250.77   21.90
  -2   2  -2  229.98   22.20
  -2   2  -2  208.08   20.30
  -2  -2   2  223.38   20.50
  -2   2  -2  236.58   22.10
  -2  -2   2  212.08   21.40
  -2   2  -2  236.18   21.50
  -2  -2   2  216.08   18.00
  -2   2  -2  206.28   21.10
   2  -2   2  193.28   20.40
   2   2  -2  239.28   23.20
   2   2  -2  234.38   21.70
   2   2  -2  187.98   20.20
   2  -2   2  220.68   22.20
   2  -2   2  236.58   21.80
   2   2  -2  196.28   18.50
   2  -2   2  216.48   19.70
   2  -2   2  184.28   21.20
   2   2  -2  217.18   19.70
   2  -2   2  194.38   21.30
   2   2  -2  229.48   17.40
   2   2  -2  191.08   19.50
  -2   2  -1 4335.37  176.88
  -2   2  -1 4328.97  178.58
  -2  -2   1 4216.78  174.68
  -2   2  -1 4333.17  176.58
  -2   2  -1 4374.76  177.48
  -2  -2   1 4414.86  177.38
  -2   2  -1 4260.37  178.58
  -2  -2   1 4388.86  176.48
  -2   2  -1 4429.26  179.78
  -2  -2   1 4417.26  172.28
  -2  -2   1 4239.98  176.48
   2   2  -1 4763.32  172.08
   2  -2   1 4752.12  177.98
   2  -2   1 4846.92  177.08
   2   2  -1 4942.91  175.68
   2  -2   1 4892.61  178.78
   2   2  -1 4777.42  177.38
   2  -2   1 4746.53  178.78
   2  -2   1 4823.32  181.08
   2   2  -1 4725.03  177.28
   2  -2   1 4899.81  180.68
  -2  -2   0  541.15   25.20
  -2   2   0  528.45   25.10
  -2   2   0  535.55   27.50
  -2   2   0  519.35   25.60
  -2   2   0  552.04   26.00
   2  -2   0  504.25   27.20
   2  -2   0  501.55   25.30
   2  -2   0  507.65   25.00
  -2  -2  -1 4885.01  180.58
  -2   2   1 4880.11  180.38
  -2   2   1 4952.50  181.68
  -2  -2  -1 4872.51  179.48
  -2  -2  -1 4987.90  180.48
  -2   2   1 4873.31  184.68
  -2  -2  -1 4917.31  180.48
  -2  -2  -1 4977.70  183.28
  -2  -2  -1 4878.51  181.28
  -2  -2  -1 4823.52  179.78
  -2   2   1 4851.01  183.58
  -2   2   1 4871.11  181.38
   2  -2  -1 4387.96  179.38
   2  -2  -1 4276.27  179.88
   2   2   1 4286.77  178.18
   2  -2  -1 4347.67  175.58
   2   2   1 4347.06  181.08
   2  -2  -1 4294.77  182.78
   2  -2  -1 4376.76  183.38
   2   2   1 4435.06  180.38
   2   2   1 4264.27  178.28
   2  -2  -1 4342.47  180.38
  -2   2   2  217.58   20.90
  -2  -2  -2  218.48   21.50
  -2   2   2  217.68   21.70
  -2  -2  -2  230.88   21.70
  -2   2   2  241.48   23.30
  -2  -2  -2  201.68   20.90
  -2  -2  -2  229.28   24.10
  -2  -2  -2  240.28   22.20
  -2   2   2  229.08   22.10
  -2   2   2  179.58   22.00
  -2  -2  -2  225.28   20.80
   2  -2  -2  212.68   21.20
   2   2   2  268.07   23.30
   2   2   2  223.58   21.40
   2   2   2  243.58   21.60
   2  -2  -2  230.08   22.80
   2   2   2  225.98   22.50
   2  -2  -2  227.58   21.80
   2  -2  -2  264.27   25.70
   2  -2  -2  203.38   20.50
  -2  -2  -3  213.78   30.00
  -2   2   3  240.78   27.00
  -2  -2  -3  213.98   25.80
  -2  -2  -3  203.48   23.50
  -2  -2  -3  174.98   26.30
  -2   2   3  206.98   28.30
  -2   2   3  214.68   30.10
  -2   2   3  241.18   35.00
  -2  -2  -3  268.67   36.70
  -2  -2  -3  224.78   31.60
  -2  -2  -3  230.68   25.80
  -2   2   3  207.08   30.00
   2  -2  -3  182.18   31.00
   2   2   3  160.98   26.50
   2  -2  -3  164.58   20.00
   2   2   3  169.78   27.50
   2  -2  -3  123.99   23.60
   2   2   3  164.18   26.20
   2   2   3  172.78   27.80
   2  -2  -3  187.58   27.80
   2  -2  -3  169.48   28.50
  -2  -2  -4  663.23   58.09
  -2   2   4  717.63   56.09
  -2  -2  -4  684.03   54.39
  -2  -2  -4  650.23   55.19
  -2  -2  -4  602.84   50.79
  -2  -2  -4  644.54   53.59
  -2   2   4  621.94   52.19
   2  -2  -4  698.83   57.29
   2  -2  -4  666.13   52.09
   2  -2  -4  711.33   55.39
   2  -2  -4  684.43   59.49
   2  -2  -4  726.73   48.90
   2   2   4  701.63   56.29
   2   2   4  693.43   56.09
  -2  -2  -5  243.98   47.70
  -2   2   5  212.08   40.10
  -2  -2  -5  213.48   42.10
  -2   2   5  203.38   39.30
  -2  -2  -5  256.77   43.00
   2  -2  -5  167.58   36.20
   2  -2  -5  168.88   42.20
   2  -2  -5  212.48   41.60
   2   2   5  200.58   40.40
   2   2   5  247.48   43.30
  -2  -2  -6   72.29   36.70
  -2  -2  -6   33.80   30.70
  -2   2   6    3.90   27.30
  -2  -2  -6   71.49   29.00
   2  -2  -6   13.70   30.10
   2   2   6   39.40   27.30
   2  -2  -6   54.09   34.20
   2  -2  -6   59.99   29.10
  -3   2  -6  144.59   44.00
  -3  -2   6   58.29   34.60
  -3   2  -6   87.09   31.70
  -3   2  -6  100.39   34.40
   3   2  -6   49.50   30.40
   3   2  -6  186.38   46.10
   3   2  -6   85.59   33.40
  -3   2  -5   77.59   26.40
  -3   2  -5   73.49   30.80
  -3  -2   5   97.39   29.20
  -3  -2   5   64.69   26.90
   3   2  -5   13.40   26.20
   3   2  -5   66.89   29.80
   3   2  -5   46.40   24.30
   3  -2   5   74.79   25.90
   3   2  -5   74.39   23.20
   3  -2   5  162.28   36.60
  -3   2  -4   69.79   22.80
  -3   2  -4   67.19   21.80
  -3  -2   4   95.89   22.90
  -3   2  -4   56.89   20.50
  -3   2  -4   40.00   22.30
  -3  -2   4   96.19   23.90
  -3  -2   4   44.60   20.20
   3   2  -4   53.09   25.30
   3  -2   4   96.19   27.50
   3   2  -4   32.10   13.30
   3   2  -4   58.99   21.90
   3   2  -4   69.19   20.40
   3  -2   4   56.39   22.50
  -3   2  -3  385.06   33.70
  -3   2  -3  365.66   34.40
  -3   2  -3  348.77   33.50
  -3   2  -3  440.16   35.50
  -3   2  -3  387.36   33.50
  -3  -2   3  358.06   34.30
  -3   2  -3  402.86   40.30
  -3  -2   3  358.76   31.90
  -3   2  -3  334.17   32.30
  -3  -2   3  388.26   35.00
   3   2  -3  380.56   37.40
   3  -2   3  419.16   36.50
   3   2  -3  379.46   27.20
   3   2  -3  354.16   30.70
   3  -2   3  396.96   32.80
   3   2  -3  379.66   32.40
   3   2  -3  370.86   35.80
   3  -2   3  417.66   35.10
   3   2  -3  413.76   34.20
   3  -2   3  403.96   35.80
  -3   2  -2  335.77   29.00
  -3   2  -2  334.77   27.80
  -3  -2   2  369.56   28.20
  -3  -2   2  339.37   29.20
  -3   2  -2  342.07   29.00
  -3  -2   2  390.76   29.30
  -3  -2   2  328.27   27.10
  -3   2  -2  374.96   28.70
  -3   2  -2  335.27   27.70
   3  -2   2  415.06   30.40
   3   2  -2  427.06   30.50
   3  -2   2  451.45   33.40
   3  -2   2  450.95   30.80
   3  -2   2  433.96   30.90
   3   2  -2  422.66   32.60
   3  -2   2  429.56   29.10
   3   2  -2  439.06   32.10
   3  -2   2  454.35   32.70
   3   2  -2  422.26   29.30
   3   2  -2  434.26   22.80
  -3   2  -1 3816.42  141.99
  -3  -2   1 3744.03  134.59
  -3  -2   1 3748.22  139.99
  -3   2  -1 3817.82  146.59
  -3   2  -1 3748.12  143.69
  -3  -2   1 3744.23  142.19
  -3  -2   1 3817.32  139.89
  -3   2  -1 3736.23  144.89
  -3  -2   1 3709.83  141.39
  -3  -2   1 3754.72  144.09
  -3   2  -1 3720.33  143.39
  -3   2  -1 3849.51  145.99
   3  -2   1 3325.87  141.99
   3   2  -1 3368.46  138.59
   3  -2   1 3342.07  144.69
   3  -2   1 3435.36  141.09
   3  -2   1 3371.86  142.59
   3   2  -1 3361.46  141.09
   3  -2   1 3381.36  144.99
   3   2  -1 3388.06  140.19
   3  -2   1 3315.47  142.59
   3   2  -1 3310.17  133.89
  -3   2   0 3103.09  120.09
  -3   2   0 2953.40  115.89
  -3   2   0 2992.50  117.29
  -3  -2   0 2917.51  111.79
  -3  -2   0 2930.61  111.09
  -3   2   0 2827.22  116.69
   3  -2   0 2963.50  116.09
   3  -2   0 2904.31  116.29
   3   2   0 2987.90  110.79
   3  -2   0 3085.29  120.29
   3  -2   0 3019.10  113.49
   3   2   0 2810.02  112.49
   3  -2   0 2956.10  119.39
  -3  -2  -1 3317.77  139.49
  -3   2   1 3353.66  145.19
  -3   2   1 3413.96  142.29
  -3  -2  -1 3229.08  140.69
  -3   2   1 3294.97  144.99
  -3   2   1 3382.36  141.79
  -3   2   1 3344.87  139.69
  -3  -2  -1 3392.86  141.09
  -3  -2  -1 3374.26  140.49
  -3  -2  -1 3332.77  143.59
   3  -2  -1 3659.13  145.99
   3   2   1 3748.62  139.89
   3   2   1 3681.53  139.09
   3  -2  -1 3869.01  143.39
   3   2   1 3778.42  142.19
   3  -2  -1 3822.52  136.39
   3  -2  -1 3812.02  140.79
   3  -2  -1 3734.33  146.89
   3   2   1 3736.53  144.39
   3  -2  -1 3845.12  142.99
   3   2   1 3731.23  142.09
  -3  -2  -2  453.55   31.20
  -3  -2  -2  420.06   33.20
  -3  -2  -2  449.76   29.50
  -3  -2  -2  446.76   30.10
  -3   2   2  468.55   32.90
  -3   2   2  453.65   30.30
  -3  -2  -2  450.95   31.70
  -3  -2  -2  413.66   29.40
  -3   2   2  426.56   29.90
  -3   2   2  458.75   31.40
  -3  -2  -2  418.16   32.00
  -3   2   2  384.16   31.00
   3  -2  -2  338.77   27.70
   3  -2  -2  308.27   25.80
   3  -2  -2  367.96   28.50
   3   2   2  307.97   26.60
   3   2   2  338.97   27.00
   3   2   2  354.06   29.00
   3  -2  -2  336.87   29.90
   3   2   2  317.47   27.90
   3  -2  -2  315.77   30.40
  -3   2   3  418.96   35.70
  -3  -2  -3  378.96   37.90
  -3  -2  -3  423.36   37.40
  -3  -2  -3  411.46   35.40
  -3   2   3  428.06   36.70
  -3  -2  -3  406.06   35.30
  -3   2   3  452.05   40.00
  -3   2   3  410.86   34.20
  -3  -2  -3  478.05   37.70
  -3   2   3  427.36   35.30
  -3  -2  -3  377.96   32.70
  -3  -2  -3  377.96   35.10
   3  -2  -3  342.87   32.40
   3  -2  -3  381.76   38.10
   3  -2  -3  370.06   37.30
   3  -2  -3  400.56   34.40
   3   2   3  394.86   35.40
   3  -2  -3  362.86   28.40
   3   2   3  364.56   35.00
   3   2   3  349.07   32.50
  -3  -2  -4   69.39   22.40
  -3   2   4   28.70   19.00
  -3   2   4   48.80   19.10
  -3  -2  -4   49.40   20.40
  -3  -2  -4   61.39   25.30
  -3   2   4   83.29   23.00
  -3  -2  -4   48.90   21.10
  -3   2   4   75.39   25.50
  -3  -2  -4   76.09   21.60
   3   2   4   47.40   18.60
   3  -2  -4   62.59   18.00
   3  -2  -4   44.20   23.10
   3  -2  -4   69.99   21.90
   3   2   4   62.19   23.40
   3  -2  -4   30.10   21.30
  -3  -2  -5   45.20   22.50
  -3   2   5   96.89   30.30
  -3   2   5   95.39   28.10
  -3  -2  -5   64.19   28.50
  -3  -2  -5   81.79   31.10
   3   2   5   72.09   26.80
   3  -2  -5   43.40   21.20
   3  -2  -5   64.09   45.60
   3  -2  -5   35.20   24.20
   3   2   5   61.19   25.10
   3  -2  -5   34.90   26.20
  -3  -2  -6  129.09   39.90
  -3  -2  -6  101.89   36.00
  -3   2   6   96.99   38.40
  -3   2   6   63.09   33.70
  -3  -2  -6   59.89   30.60
   3  -2  -6  110.59   37.50
   3  -2  -6  160.68   44.80
   3   2   6   78.09   29.10
   3  -2  -6   84.89   38.80
  -4   2  -6   -1.60   21.60
  -4   2  -6  -26.60   26.10
  -4   2  -6   44.90   30.50
  -4  -2   6  -26.70   20.50
   4   2  -6   45.50   30.70
   4   2  -6    0.70   26.90
   4  -2   6   11.00   30.70
   4   2  -6   29.50   31.20
  -4   2  -5  149.99   36.60
  -4  -2   5  116.79   32.00
  -4   2  -5  126.29   32.10
  -4   2  -5  163.08   35.90
  -4  -2   5  134.79   34.70
   4   2  -5  277.07   49.70
   4   2  -5  169.58   35.10
   4  -2   5  197.58   40.10
   4  -2   5  198.78   41.90
  -4   2  -4  979.30   66.69
  -4   2  -4 1054.99   69.49
  -4  -2   4 1066.29   69.79
  -4   2  -4 1004.80   67.19
  -4  -2   4  922.41   66.69
  -4   2  -4  990.00   75.79
   4   2  -4  933.71   67.99
   4  -2   4  873.41   66.39
   4   2  -4  976.30   71.99
   4   2  -4  958.70   53.69
   4  -2   4 1013.00   69.79
   4   2  -4  904.31   63.49
  -4  -2   3  292.37   29.70
  -4   2  -3  246.28   27.80
  -4   2  -3  314.47   44.10
  -4  -2   3  293.47   29.90
  -4   2  -3  360.16   33.90
  -4  -2   3  290.67   31.60
  -4   2  -3  272.27   30.20
  -4  -2   3  280.77   28.30
  -4   2  -3  284.57   28.30
  -4   2  -3  308.47   30.90
   4  -2   3  298.07   30.10
   4  -2   3  277.17   28.30
   4   2  -3  275.97   30.70
   4   2  -3  266.87   27.90
   4  -2   3  250.97   30.40
   4  -2   3  223.28   32.70
   4   2  -3  257.37   27.20
   4  -2   3  278.47   29.00
   4   2  -3  281.97   28.50
   4   2  -3  303.07   32.80
   4   2  -3  256.27   20.70
  -4   2  -2   70.79   16.10
  -4  -2   2   69.19   15.90
  -4  -2   2   72.79   14.60
  -4   2  -2   87.19   17.30
  -4   2  -2   80.89   15.80
  -4  -2   2   80.39   15.90
  -4   2  -2   67.19   16.10
  -4  -2   2   49.99   15.20
  -4   2  -2   78.59   15.60
  -4  -2   2   57.79   14.00
  -4   2  -2   82.99   17.80
   4  -2   2   77.69   15.10
   4   2  -2   60.89   12.60
   4   2  -2   43.00   13.60
   4  -2   2   90.69   18.70
   4   2  -2   86.09   17.20
   4  -2   2   93.89   17.40
   4   2  -2   62.79    8.40
   4  -2   2   74.89   18.20
   4  -2   2   62.59   14.70
   4   2  -2   77.99   14.90
   4  -2   2   65.89   14.50
  -4   2  -1 1228.08   57.39
  -4  -2   1 1235.28   50.39
  -4  -2   1 1223.38   52.59
  -4   2  -1 1255.07   55.99
  -4   2  -1 1101.59   54.29
  -4   2  -1 1267.87   57.19
  -4   2  -1 1136.99   53.59
  -4  -2   1 1214.28   50.49
  -4  -2   1 1247.78   43.40
  -4  -2   1 1197.48   51.19
  -4   2  -1 1189.08   51.29
   4  -2   1 1003.90   50.19
   4   2  -1  960.40   49.10
   4  -2   1  955.70   54.49
   4  -2   1  995.90   54.69
   4  -2   1  987.50   55.79
   4   2  -1  978.60   50.69
   4   2  -1 1014.50   48.40
  -4  -2   0 1264.57   51.39
  -4  -2   0 1275.57   49.80
  -4   2   0 1243.98   56.79
  -4   2   0 1326.97   60.19
  -4  -2   0 1306.07   52.79
  -4   2   0 1258.17   55.39
  -4   2   0 1276.37   57.09
   4  -2   0 1256.07   55.79
   4  -2   0 1195.98   55.39
   4  -2   0 1257.97   56.69
   4  -2   0 1307.87   59.79
   4   2   0 1295.97   50.99
   4  -2   0 1288.47   50.19
  -4  -2  -1 1039.40   54.19
  -4   2   1 1031.80   55.49
  -4  -2  -1  990.80   50.89
  -4   2   1 1042.60   52.39
  -4   2   1 1032.80   49.00
  -4  -2  -1  967.30   49.90
  -4   2   1 1030.90   45.40
  -4   2   1 1035.90   52.09
  -4  -2  -1  974.10   49.20
  -4   2   1  932.31   54.99
  -4  -2  -1  999.00   49.99
   4   2   1 1257.27   52.29
   4   2   1 1157.28   55.29
   4  -2  -1 1189.28   46.20
   4  -2  -1 1182.18   56.49
   4  -2  -1 1200.28   50.09
   4   2   1 1215.18   52.59
   4  -2  -1 1233.98   53.59
   4   2   1 1229.68   49.80
   4  -2  -1 1172.78   52.89
   4   2   1 1241.98   49.10
  -4   2   2   72.59   15.10
  -4  -2  -2   57.19   13.30
  -4  -2  -2   79.09   17.00
  -4  -2  -2   60.99   14.90
  -4   2   2   87.99   18.70
  -4  -2  -2   66.09   16.80
  -4  -2  -2   61.69   14.30
  -4   2   2   88.29   18.10
  -4   2   2   61.69   14.80
  -4   2   2   79.59   15.40
  -4  -2  -2   88.69   18.90
  -4  -2  -2   77.89   17.30
  -4  -2  -2   76.59   15.70
   4   2   2   72.69   16.10
   4  -2  -2   57.19   16.70
   4  -2  -2   81.99   10.80
   4  -2  -2   78.59   17.70
   4  -2  -2   59.69   14.10
   4   2   2   71.99   15.70
   4   2   2   61.29   14.00
   4  -2  -2   60.09   14.10
   4   2   2   63.69   13.10
   4  -2  -2   71.89   15.00
  -4   2   3  244.08   28.10
  -4   2   3  227.88   26.80
  -4  -2  -3  281.67   30.70
  -4   2   3  293.57   34.70
  -4  -2  -3  223.38   32.30
  -4  -2  -3  309.47   33.70
  -4   2   3  285.97   39.30
  -4   2   3  292.77   32.50
  -4  -2  -3  280.57   29.00
  -4  -2  -3  269.57   27.80
   4  -2  -3  255.17   27.20
   4   2   3  261.27   28.60
   4   2   3  338.17   30.00
   4  -2  -3  292.77   33.90
   4   2   3  308.57   31.20
   4  -2  -3  257.47   28.30
   4  -2  -3  253.97   22.40
   4  -2  -3  295.47   29.00
   4   2   3  269.57   28.80
   4  -2  -3  279.37   33.00
  -4   2   4  977.20   67.99
  -4  -2  -4  907.71   67.99
  -4   2   4  925.21   64.89
  -4  -2  -4  931.91   66.39
  -4  -2  -4  920.71   72.39
  -4   2   4 1013.20   68.99
  -4  -2  -4  934.31   64.59
  -4  -2  -4  977.80   70.09
  -4   2   4 1051.89   76.19
   4   2   4  969.00   68.99
   4  -2  -4  960.50   55.89
   4  -2  -4 1110.99   75.79
   4  -2  -4 1091.29   69.19
   4   2   4 1052.79   69.69
   4  -2  -4  985.10   74.69
  -4  -2  -5  188.18   34.70
  -4   2   5  114.09   33.30
  -4  -2  -5  252.97   43.20
  -4  -2  -5  231.48   46.60
  -4   2   5  208.88   39.70
  -4  -2  -5  194.78   39.10
   4  -2  -5  172.08   36.10
   4  -2  -5  106.19   37.20
   4  -2  -5  123.59   34.40
   4   2   5  118.69   31.80
   4   2   5  142.59   36.20
   4  -2  -5  195.28   29.80
  -4  -2  -6  -10.40   23.40
  -4   2   6  -28.70   17.50
  -4  -2  -6   26.80   22.20
   4  -2  -6    3.80   29.60
   4  -2  -6   21.60   26.30
   4  -2  -6  -35.00   26.50
   4   2   6    7.60   19.20
   4   2   6    2.40   28.10
  -5   2  -6  136.49   39.90
  -5   2  -6  108.19   37.60
  -5  -2   6   98.09   35.90
   5   2  -6  134.89   47.40
   5   2  -6  168.78   37.70
   5   2  -6  115.29   36.50
   5  -2   6  152.98   39.10
   5  -2   6   94.59   34.40
  -5   2  -5   39.00   21.70
  -5  -2   5   -5.60   18.80
  -5  -2   5    9.10   21.10
  -5   2  -5   19.30   21.80
  -5   2  -5    7.30   21.50
   5  -2   5   14.40   20.60
   5   2  -5  -30.90   15.30
   5   2  -5  -15.60   22.20
   5  -2   5    4.70   21.90
   5   2  -5   12.50   22.80
   5   2  -5  -16.80   17.50
  -5   2  -4   23.90   18.10
  -5   2  -4   50.09   24.30
  -5  -2   4    5.20   14.10
  -5   2  -4   35.30   16.40
  -5   2  -4   39.90   18.20
  -5  -2   4   41.10   19.50
   5  -2   4   29.80   18.80
   5  -2   4   38.20   21.90
   5   2  -4   37.50   19.60
   5   2  -4   22.00   18.70
   5   2  -4   15.10   13.80
   5   2  -4   34.20   12.40
  -5   2  -3  381.26   36.20
  -5   2  -3  329.67   32.60
  -5   2  -3  378.76   36.50
  -5  -2   3  344.07   33.50
  -5   2  -3  371.96   34.60
  -5  -2   3  365.86   33.60
  -5  -2   3  400.46   34.70
  -5  -2   3  354.76   35.10
  -5  -2   3  435.16   34.10
  -5   2  -3  361.46   33.00
   5  -2   3  327.07   33.70
   5   2  -3  426.36   37.10
   5   2  -3  378.76   32.10
   5  -2   3  345.47   33.20
   5   2  -3  302.37   28.70
   5   2  -3  325.47   31.40
   5  -2   3  301.47   30.90
   5   2  -3  318.67   34.50
   5  -2   3  305.37   32.20
   5   2  -3  351.76   22.10
  -5   2  -2  743.83   46.00
  -5  -2   2  754.82   43.50
  -5   2  -2  791.82   48.80
  -5   2  -2  725.03   44.30
  -5  -2   2  759.02   42.40
  -5  -2   2  731.63   45.60
  -5   2  -2  786.32   48.30
  -5  -2   2  800.82   47.50
  -5  -2   2  839.22   45.10
  -5   2  -2  749.42   47.80
  -5   2  -2  784.22   44.10
   5  -2   2  705.93   44.50
   5  -2   2  716.53   49.50
   5  -2   2  642.54   43.30
   5  -2   2  717.13   44.20
   5   2  -2  691.13   41.50
   5  -2   2  711.63   47.20
   5   2  -2  709.33   29.50
   5  -2   2  697.73   43.40
   5   2  -2  748.63   46.40
  -5  -2   1  133.89   12.60
  -5   2  -1  145.19   20.00
  -5   2  -1  138.09   19.30
  -5  -2   1  121.49   12.20
  -5   2  -1  133.59   19.00
  -5  -2   1  132.99    6.90
  -5   2  -1  135.89   12.80
  -5  -2   1  133.49    7.10
  -5   2  -1  128.89   15.30
  -5   2  -1  146.79   16.40
  -5  -2   1  157.28   14.80
  -5  -2   1  130.99   12.40
  -5   2   0   33.00    8.60
  -5   2   0   29.40    8.70
  -5  -2   0   19.40    5.30
  -5   2   0   33.70   10.10
  -5  -2   0   30.60    5.30
  -5  -2   0   31.50    7.00
  -5  -2   0   33.60    5.80
  -5   2   0   26.60    8.50
   5  -2   0   31.60    4.30
   5  -2   0   31.10    8.40
   5   2   0   32.80    5.70
   5  -2   0   31.00    8.60
   5  -2   0   33.10   10.30
   5  -2   0   38.70    8.70
  -5  -2  -1   76.19   15.30
  -5  -2  -1   56.89    9.90
  -5   2   1   80.49   14.80
  -5   2   1   65.79    7.50
  -5   2   1   63.39   12.60
  -5  -2  -1   66.59   12.10
  -5  -2  -1   62.89   14.60
  -5   2   1   61.49   14.20
  -5   2   1   56.19   11.80
  -5  -2  -1   66.59   11.40
  -5  -2  -1   71.29   11.30
  -5  -2  -2  615.94   42.90
  -5   2   2  670.13   43.80
  -5   2   2  673.43   41.90
  -5  -2  -2  671.83   41.90
  -5   2   2  696.13   47.90
  -5   2   2  686.53   43.30
  -5   2   2  680.23   47.10
  -5  -2  -2  725.33   43.30
  -5  -2  -2  754.22   46.00
  -5  -2  -2  676.13   46.10
  -5  -2  -2  689.33   47.10
   5  -2  -2  722.63   43.70
   5  -2  -2  787.42   49.50
   5   2   2  733.13   41.60
   5  -2  -2  821.52   45.80
   5  -2  -2  788.62   33.70
   5  -2  -2  732.83   48.60
   5   2   2  708.73   45.40
   5   2   2  827.02   45.60
   5   2   2  771.92   43.40
   5  -2  -2  769.52   42.40
  -5  -2  -3  357.06   36.10
  -5  -2  -3  371.56   35.10
  -5   2   3  338.97   35.00
  -5  -2  -3  343.77   37.80
  -5  -2  -3  366.76   38.10
  -5  -2  -3  403.46   38.00
  -5   2   3  366.86   33.50
  -5  -2  -3  399.86   33.40
  -5   2   3  403.16   36.60
  -5  -2  -3  409.36   41.70
  -5   2   3  325.37   35.20
   5   2   3  362.76   34.60
   5  -2  -3  359.06   33.70
   5  -2  -3  332.87   24.40
   5  -2  -3  348.87   32.00
   5  -2  -3  326.17   36.40
   5  -2  -3  350.76   33.50
   5   2   3  374.26   34.20
   5  -2  -3  304.77   36.40
   5   2   3  366.06   34.50
   5   2   3  364.36   33.10
  -5  -2  -4   32.70   19.40
  -5  -2  -4   18.70   15.20
  -5   2   4   10.80   14.90
  -5  -2  -4   -3.20   13.20
  -5   2   4   31.30   21.90
  -5   2   4   18.90   18.70
  -5  -2  -4   59.19   21.20
  -5   2   4   43.60   18.90
  -5  -2  -4   25.40   15.20
   5  -2  -4   30.00   20.80
   5   2   4   29.30   19.80
   5  -2  -4   22.40   12.10
   5  -2  -4   37.30   22.60
   5  -2  -4   52.19   21.10
   5   2   4   44.50   21.80
  -5  -2  -5   23.70   24.40
  -5  -2  -5   35.20   19.20
  -5   2   5    7.50   20.60
  -5  -2  -5   26.40   19.60
  -5  -2  -5    4.10   19.50
  -5   2   5    0.60   19.30
   5  -2  -5  -28.00   17.30
   5  -2  -5   29.60   17.70
   5   2   5   21.20   21.10
   5   2   5   47.00   24.80
   5  -2  -5   30.40   29.20
   5  -2  -5   -1.20   22.70
  -5   2   6   56.09   32.10
  -5  -2  -6   83.49   38.00
  -5  -2  -6   99.59   33.20
   5  -2  -6  148.19   45.80
   5   2   6  156.78   39.10
   5  -2  -6   28.40   38.90
   5  -2  -6  114.49   38.50
   5   2   6  132.99   33.90
  -6  -2   5  290.17   46.50
  -6  -2   5  270.07   44.80
  -6   2  -5  326.97   51.69
  -6   2  -5  361.56   56.99
  -6   2  -5  314.77   50.39
   6   2  -5  215.38   43.00
   6   2  -5  345.97   55.99
   6  -2   5  327.27   50.49
   6   2  -5  235.98   37.50
   6  -2   5  273.07   44.80
   6   2  -5  278.67   27.50
  -6   2  -4  152.08   36.90
  -6   2  -4  205.18   37.20
  -6   2  -4  160.08   32.20
  -6  -2   4  181.98   33.90
  -6  -2   4  148.39   29.10
  -6   2  -4  109.49   27.20
  -6   2  -4  130.69   26.00
   6  -2   4   96.29   27.10
   6   2  -4  149.79   28.10
   6   2  -4  102.99   21.40
   6   2  -4  105.09   28.40
   6  -2   4  104.09   27.00
  -6   2  -3  690.93   52.09
  -6   2  -3  623.54   46.80
  -6   2  -3  613.34   49.99
  -6  -2   3  674.63   54.69
  -6   2  -3  661.73   51.69
  -6  -2   3  617.54   48.30
  -6  -2   3  657.73   47.80
  -6   2  -3  736.83   51.99
  -6  -2   3  698.63   51.79
  -6  -2   3  666.23   46.40
   6   2  -3  686.23   30.60
   6   2  -3  714.93   47.40
   6  -2   3  724.93   53.19
   6  -2   3  730.73   49.00
   6  -2   3  724.23   50.39
   6  -2   3  699.93   49.50
   6   2  -3  685.63   46.90
   6  -2   3  726.83   50.89
   6   2  -3  744.63   52.89
  -6  -2   2  145.09   20.30
  -6  -2   2  113.69   19.30
  -6   2  -2  120.69   19.00
  -6  -2   2  107.69   21.20
  -6   2  -2  152.98   24.80
  -6   2  -2  122.29   21.50
  -6   2  -2  114.79   22.20
  -6  -2   2  134.39   19.00
  -6   2  -2  142.19   21.60
  -6  -2   2  154.78   21.90
   6  -2   2  148.09   25.20
   6  -2   2  149.79   21.00
   6   2  -2  138.89   21.30
   6   2  -2  127.69   17.90
   6  -2   2  163.18   24.70
   6  -2   2  153.98   21.80
   6  -2   2  153.48   23.10
   6  -2   2  110.39   23.10
  -6   2  -1  429.86   31.80
  -6  -2   1  437.86   25.40
  -6   2  -1  426.56   31.10
  -6  -2   1  449.56   27.90
  -6  -2   1  450.85   18.80
  -6   2  -1  402.26   31.30
  -6   2  -1  419.66   30.40
  -6   2  -1  462.35   24.80
  -6  -2   1  451.45   24.30
  -6   2  -1  487.25   30.50
  -6  -2   1  442.06   18.50
   6  -2   1  366.06   26.80
   6   2  -1  365.26   25.90
   6  -2   1  385.66   30.60
   6  -2   1  378.56   24.20
   6  -2   1  434.46   29.30
   6  -2   1  400.86   30.60
   6   2  -1  394.76   23.80
   6   2  -1  399.56   23.20
  -6   2   0 2016.70   85.69
  -6   2   0 1951.60   83.29
  -6  -2   0 1941.71   79.49
  -6  -2   0 1921.11   78.59
  -6   2   0 2001.50   88.99
  -6  -2   0 1935.71   83.09
  -6  -2   0 1874.01   81.09
  -6  -2   0 1887.81   75.49
  -6   2   0 1939.91   85.39
   6  -2   0 2011.00   88.99
   6   2   0 1947.31   81.39
   6   2   0 1868.91   78.29
   6  -2   0 1979.10   85.09
   6  -2   0 1881.31   82.59
   6  -2   0 1926.81   72.69
   6  -2   0 1940.11   83.99
  -6  -2  -1  407.16   31.00
  -6  -2  -1  384.76   27.60
  -6   2   1  393.36   31.70
  -6  -2  -1  417.76   32.10
  -6  -2  -1  369.36   26.00
  -6  -2  -1  387.56   25.00
  -6   2   1  394.16   28.60
  -6   2   1  424.96   32.80
  -6  -2  -1  384.46   25.60
  -6   2   1  441.76   29.90
  -6   2   1  380.96   21.30
   6   2   1  460.05   24.20
   6  -2  -1  445.96   28.50
   6   2   1  472.15   23.30
   6   2   1  500.85   27.40
   6  -2  -1  430.66   32.70
   6  -2  -1  445.46   23.40
   6  -2  -1  476.15   32.80
   6  -2  -1  461.85   22.90
   6   2   1  469.15   28.70
  -6   2   2  134.29   19.10
  -6   2   2  147.19   25.00
  -6  -2  -2  114.79   18.20
  -6  -2  -2  142.59   22.50
  -6  -2  -2  138.49   22.30
  -6  -2  -2  120.39   22.60
  -6   2   2  160.48   22.90
  -6   2   2  163.78   26.20
  -6  -2  -2  149.88   21.00
  -6  -2  -2  120.59   22.90
  -6   2   2  163.68   22.60
   6   2   2  159.68   24.40
   6  -2  -2  117.99    9.40
   6  -2  -2  121.09   20.30
   6  -2  -2  155.08   25.50
   6   2   2  139.69   30.60
   6   2   2  111.69   18.80
   6  -2  -2  109.69   19.20
   6   2   2  108.99   16.80
   6   2   2  133.49   21.70
   6  -2  -2  138.29   19.60
   6   2   2  132.39   19.10
  -6  -2  -3  839.52   58.39
  -6   2   3  734.53   51.49
  -6  -2  -3  743.63   56.19
  -6  -2  -3  782.32   53.29
  -6  -2  -3  712.23   53.39
  -6   2   3  663.53   52.59
  -6  -2  -3  745.33   50.99
  -6  -2  -3  738.83   49.30
  -6  -2  -3  735.33   51.79
  -6   2   3  631.94   52.79
  -6   2   3  730.53   49.50
  -6   2   3  685.83   47.80
  -6  -2  -3  714.03   53.59
   6   2   3  641.14   45.40
   6   2   3  703.43   48.80
   6  -2  -3  662.53   53.69
   6   2   3  778.62   51.89
   6  -2  -3  632.24   34.10
   6   2   3  639.24   49.20
   6  -2  -3  642.24   48.10
   6  -2  -3  702.23   35.60
   6  -2  -3  739.03   55.89
   6  -2  -3  670.93   48.10
   6  -2  -3  661.33   46.60
  -6  -2  -4   78.39   21.60
  -6  -2  -4  139.69   31.10
  -6   2   4  103.19   25.50
  -6   2   4  109.19   26.50
  -6  -2  -4  121.69   27.00
  -6   2   4  146.39   33.60
  -6   2   4  105.79   23.60
  -6  -2  -4   80.89   27.60
  -6  -2  -4  104.99   27.60
   6   2   4  201.78   36.60
   6   2   4  115.19   28.00
   6  -2  -4  118.39   31.10
   6  -2  -4  136.29   29.10
   6  -2  -4  147.49   34.70
   6  -2  -4  139.69   19.00
   6  -2  -4  163.68   18.00
  -6   2   5  279.37   46.90
  -6  -2  -5  324.77   47.30
  -6   2   5  286.97   47.70
  -6  -2  -5  298.87   54.09
  -6  -2  -5  316.47   48.40
  -6  -2  -5  291.47   49.10
   6  -2  -5  285.37   44.00
   6  -2  -5  332.67   32.30
   6  -2  -5  253.77   49.30
   6   2   5  245.08   42.50
   6  -2  -5  321.87   46.90
   6   2   5  336.87   49.80
   6  -2  -5  405.56   61.29
  -7   2  -5   28.90   22.20
  -7  -2   5   28.40   25.20
  -7  -2   5    9.40   19.50
  -7   2  -5   49.60   25.20
  -7   2  -5   27.80   22.90
   7  -2   5   27.80   26.20
   7   2  -5   26.70   21.20
   7  -2   5   37.70   25.30
   7   2  -5   17.70   22.10
  -7  -2   4  148.09   30.80
  -7  -2   4  178.98   31.90
  -7   2  -4  213.48   37.90
  -7   2  -4  180.68   34.30
   7   2  -4  174.18   11.70
   7   2  -4  184.58   30.80
   7   2  -4  148.79   31.40
   7  -2   4  153.38   33.70
   7  -2   4  153.88   32.70
  -7  -2   3  144.39   27.30
  -7   2  -3  131.89   26.50
  -7   2  -3  204.38   33.60
  -7  -2   3  145.39   23.80
  -7   2  -3  168.18   27.40
  -7  -2   3  148.29   25.30
  -7   2  -3  172.78   31.50
  -7   2  -3  170.38   31.80
  -7  -2   3  171.68   28.20
   7  -2   3   89.89   23.40
   7   2  -3   88.49   18.80
   7   2  -3  115.99   24.40
   7  -2   3   92.79   22.60
   7   2  -3   84.39   19.60
   7  -2   3  115.79   22.60
   7  -2   3  119.69   24.70
  -7  -2   2  671.13   44.60
  -7   2  -2  703.43   41.80
  -7   2  -2  758.42   46.40
  -7   2  -2  722.23   48.40
  -7   2  -2  746.83   49.00
  -7  -2   2  665.93   41.00
  -7   2  -2  662.53   47.80
  -7  -2   2  638.04   46.80
  -7  -2   2  644.44   42.20
  -7   2  -2  706.33   48.60
  -7  -2   2  662.23   40.90
   7   2  -2  707.33   40.70
   7  -2   2  678.93   48.50
   7   2  -2  783.02   46.70
   7   2  -2  692.03   40.70
   7  -2   2  679.83   44.00
   7  -2   2  760.92   52.29
   7  -2   2  759.42   46.80
   7  -2   2  678.53   42.70
  -7  -2   1  310.07   23.10
  -7   2  -1  256.87   24.50
  -7   2  -1  273.07   25.30
  -7   2  -1  272.47   26.40
  -7  -2   1  271.37   13.90
  -7  -2   1  260.87   17.30
  -7   2  -1  231.38   22.20
  -7   2  -1  294.67   18.50
  -7   2  -1  279.97   26.50
  -7  -2   1  264.77   19.40
  -7  -2   1  265.07   19.30
   7  -2   1  244.58   20.60
   7  -2   1  235.88   24.40
   7   2  -1  221.78   15.90
   7  -2   1  212.68   21.70
   7   2  -1  219.08   17.60
   7  -2   1  230.48   17.50
   7  -2   1  251.77   25.30
   7   2  -1  207.18   19.50
  -7  -2   0   15.30    7.60
  -7  -2   0   30.90    7.80
  -7   2   0   21.40    9.30
  -7  -2   0   29.90    7.70
  -7  -2   0   28.60    4.90
  -7   2   0   33.40   10.40
  -7   2   0   20.70   10.30
  -7  -2   0   46.50   10.60
   7   2   0   20.40    6.10
   7  -2   0   38.00   10.90
   7  -2   0   19.50   10.40
   7  -2   0   32.90   10.50
   7   2   0   18.30    7.60
  -7  -2  -1  200.08   20.40
  -7   2   1  244.48   16.00
  -7   2   1  221.88   23.90
  -7   2   1  224.18   22.10
  -7  -2  -1  230.98   24.00
  -7  -2  -1  231.18   23.60
  -7  -2  -1  242.18   20.90
  -7  -2  -1  228.68   19.60
  -7   2   1  214.78   21.40
  -7  -2  -1  235.78   18.40
   7   2   1  295.27   17.70
   7   2   1  286.87   20.80
   7   2   1  266.87   16.20
   7  -2  -1  292.27   16.70
   7  -2  -1  300.17   17.60
   7   2   1  285.17   22.70
   7  -2  -1  299.47   24.10
   7  -2  -1  271.17   21.80
   7  -2  -1  291.17   26.70
  -7   2   2  688.13   44.80
  -7  -2  -2  670.53   42.70
  -7   2   2  711.13   41.00
  -7  -2  -2  649.64   47.70
  -7  -2  -2  699.23   49.40
  -7   2   2  675.93   50.09
  -7   2   2  707.53   46.10
  -7  -2  -2  723.43   52.29
  -7  -2  -2  687.13   42.30
  -7  -2  -2  797.92   47.50
  -7   2   2  697.03   49.00
   7   2   2  689.03   39.70
   7  -2  -2  654.63   43.20
   7  -2  -2  645.04   47.70
   7  -2  -2  671.63   42.70
   7   2   2  666.73   42.40
   7  -2  -2  682.63   28.90
   7   2   2  706.03   43.20
   7   2   2  727.13   45.70
   7   2   2  700.03   41.50
   7  -2  -2  709.23   40.60
  -7  -2  -3   94.29   23.10
  -7  -2  -3   73.19   24.00
  -7   2   3   50.59   16.70
  -7   2   3   74.79   22.60
  -7  -2  -3   66.19   19.90
  -7   2   3   98.89   22.00
  -7  -2  -3   60.59   17.40
  -7  -2  -3   71.69   20.30
  -7  -2  -3   89.09   20.10
  -7  -2  -3   73.59   23.10
  -7   2   3  101.99   21.90
   7  -2  -3  136.19   27.70
  -7  -2  -4  171.98   32.60
  -7   2   4  110.19   34.10
  -7   2   4  209.58   36.30
  -7  -2  -4  217.88   34.20
  -7   2   4  141.49   29.80
  -7   2   4  157.48   28.90
  -7  -2  -4  185.28   34.20
  -7  -2  -4  170.58   40.30
   7   2   4  195.98   34.50
   7  -2  -4  149.79   35.00
   7  -2  -4  173.58   30.50
   7  -2  -4  152.18   15.80
   7   2   4  196.08   35.00
   7  -2  -4  167.78   16.80
  -7  -2  -5   17.90   23.60
  -7  -2  -5   35.10   22.20
  -7   2   5   34.50   21.50
  -7   2   5   11.90   24.30
  -7   2   5   18.70   25.40
  -7  -2  -5   39.10   20.90
  -7  -2  -5   17.20   23.40
   7  -2  -5   18.00   12.40
   7  -2  -5   47.00   29.90
   7   2   5    4.60   19.80
   7  -2  -5  -10.60   13.00
   7   2   5    6.00   19.50
   7  -2  -5   19.10   22.60
  -8   2  -5  140.09   38.30
  -8  -2   5  138.59   32.30
  -8  -2   5  130.49   34.90
  -8   2  -5  106.09   33.20
  -8   2  -5  120.49   36.80
   8  -2   5  138.39   33.40
   8   2  -5  128.29   38.10
   8  -2   5  122.39   36.30
   8   2  -5  107.99   30.00
  -8  -2   4  321.47   37.90
  -8   2  -4  257.57   47.40
  -8  -2   4  277.27   43.80
  -8   2  -4  305.97   54.99
  -8  -2   4  248.18   39.30
  -8   2  -4  239.18   38.30
  -8  -2   4  220.28   35.60
  -8   2  -4  289.57   45.90
   8   2  -4  312.07   35.60
   8  -2   4  341.27   46.00
   8  -2   4  350.66   40.80
   8   2  -4  319.97   56.19
   8  -2   4  284.87   41.70
  -8   2  -3  325.67   37.00
  -8  -2   3  291.57   31.30
  -8  -2   3  265.37   32.40
  -8  -2   3  312.47   31.50
  -8   2  -3  343.27   32.10
  -8   2  -3  278.07   30.60
  -8  -2   3  310.37   47.50
  -8  -2   3  267.87   30.30
  -8   2  -3  301.07   34.10
  -8   2  -3  333.17   37.50
   8  -2   3  281.47   33.00
   8   2  -3  285.57   30.30
   8  -2   3  316.57   33.70
   8  -2   3  253.17   37.70
   8   2  -3  273.17   51.59
   8   2  -3  351.26   35.50
   8  -2   3  302.87   30.80
  -8  -2   2   23.90   11.50
  -8   2  -2   38.60   15.00
  -8  -2   2   41.20   13.10
  -8  -2   2   26.40   14.80
  -8   2  -2   11.50    9.80
  -8  -2   2   42.60   11.70
  -8  -2   2   23.90   11.00
  -8   2  -2   40.10   11.90
  -8   2  -2   42.20   16.20
  -8   2  -2   29.10   13.10
   8  -2   2   31.50   11.80
   8   2  -2   43.20   14.90
   8   2  -2   34.60   11.30
   8   2  -2   33.40   10.30
   8  -2   2   35.80   11.90
   8  -2   2   23.80   14.40
   8  -2   2   32.90   13.60
  -8  -2   1  842.72   42.90
  -8  -2   1  800.62   35.50
  -8  -2   1  829.82   42.90
  -8   2  -1  841.92   57.59
  -8   2  -1  863.51   52.59
  -8   2  -1  785.12   38.20
  -8   2  -1  873.71   50.39
  -8  -2   1  831.72   38.20
  -8  -2   1  835.52   45.80
  -8   2  -1  824.02   47.70
  -8   2  -1  797.72   49.30
   8  -2   1  790.12   47.10
   8  -2   1  768.22   44.10
   8   2  -1  802.22   37.20
   8  -2   1  802.02   50.99
   8  -2   1  783.72   50.19
   8   2  -1  823.82   41.60
   8  -2   1  791.32   39.20
   8   2  -1  800.62   49.40
  -8  -2   0   15.70    3.20
  -8  -2   0   16.10    6.80
  -8  -2   0   21.00    9.00
  -8  -2   0   29.10    8.70
  -8   2   0   11.40    7.80
  -8   2   0   32.40   11.60
  -8   2   0   28.30   10.50
  -8  -2   0   19.50    8.30
  -8   2   0   17.80    9.70
  -8  -2   0   21.30    3.50
   8  -2   0   26.00    8.10
   8  -2   0   33.80   12.40
   8   2   0   22.80    8.10
   8   2   0   25.70    6.90
   8  -2   0   29.50   10.10
   8  -2   0   21.40    9.10
  -8  -2  -1  782.02   44.50
  -8   2   1  676.53   47.70
  -8   2   1  786.62   37.40
  -8  -2  -1  774.62   45.80
  -8  -2  -1  721.63   42.00
  -8   2   1  753.22   45.40
  -8  -2  -1  720.73   47.60
  -8  -2  -1  737.53   50.19
  -8  -2  -1  796.92   39.40
  -8   2   1  854.91   47.60
   8  -2  -1  795.92   38.60
   8  -2  -1  813.92   50.29
   8  -2  -1  845.12   44.70
   8  -2  -1  861.51   46.80
   8   2   1  803.52   35.80
   8   2   1  869.01   43.70
   8   2   1  825.62   36.80
   8   2   1  884.11   46.60
   8  -2  -1  794.12   35.20
  -8  -2  -2   17.40   11.90
  -8   2   2   32.30   15.20
  -8   2   2   30.30   10.40
  -8  -2  -2   43.60   12.60
  -8   2   2   15.30   10.40
  -8  -2  -2   19.20   12.20
  -8   2   2   35.00   14.70
  -8  -2  -2   48.30   17.60
  -8   2   2   22.90   12.60
  -8  -2  -2   26.90   11.20
   8   2   2   50.29   15.20
   8  -2  -2   40.60   12.70
   8   2   2   30.90   11.60
   8   2   2   34.30   13.80
   8   2   2   23.70   11.60
   8  -2  -2   31.20   10.90
   8   2   2   36.10   12.10
   8  -2  -2   40.30   14.10
   8  -2  -2   79.29   21.00
   8   2   2   33.40   10.60
  -8  -2  -3  321.57   44.90
  -8   2   3  309.97   31.00
  -8  -2  -3  300.57   42.80
  -8   2   3  228.48   32.60
  -8  -2  -3  285.87   30.00
  -8   2   3  304.17   35.70
  -8  -2  -3  309.17   34.10
  -8  -2  -3  290.67   30.50
  -8   2   3  306.87   34.80
  -8  -2  -3  269.37   38.70
   8   2   3  303.87   29.80
   8  -2  -3  264.47   27.90
   8  -2  -3  328.47   33.00
   8  -2  -3  350.86   45.50
   8   2   3  287.37   30.40
  -8   2   4  245.18   44.60
  -8  -2  -4  290.07   47.70
  -8  -2  -4  349.96   39.00
  -8   2   4  288.77   41.10
  -8   2   4  356.86   37.90
  -8  -2  -4  328.17   53.89
  -8  -2  -4  318.47   68.39
  -8  -2  -4  288.47   42.60
  -8  -2  -4  348.07   49.20
   8   2   4  325.57   45.20
   8  -2  -4  231.08   35.40
   8  -2  -4  291.77   48.00
   8   2   4  352.26   38.40
  -8   2   5  119.49   33.80
  -8  -2  -5   85.49   32.90
  -8  -2  -5  182.38   38.90
  -8   2   5  108.39   30.90
  -8  -2  -5  156.28   35.50
  -8   2   5  171.78   38.50
  -8  -2  -5  165.38   38.90
   8  -2  -5  150.58   12.80
   8   2   5   96.49   27.70
   8  -2  -5  127.89   37.10
   8   2   5  121.89   32.50
   8  -2  -5   91.29   28.40
  -9   2  -5   75.79   35.30
  -9   2  -5  109.19   34.70
  -9   2  -5  139.79   35.60
  -9  -2   5   65.39   25.40
  -9  -2   5   68.79   29.10
   9  -2   5   37.90   25.50
   9   2  -5  152.58   44.00
   9  -2   5   83.29   27.60
  -9   2  -4   40.10   23.60
  -9  -2   4   -6.60   15.30
  -9  -2   4   17.00   13.40
  -9  -2   4    4.30   19.00
  -9   2  -4   21.00   20.30
  -9  -2   4   23.50   19.30
  -9   2  -4  -12.50   15.20
   9  -2   4   26.90   19.50
   9  -2   4    2.90   14.60
   9  -2   4   16.20   18.80
   9  -2   4   16.90   19.70
  -9   2  -3  483.15   42.10
  -9  -2   3  515.25   43.90
  -9   2  -3  546.65   48.80
  -9  -2   3  486.25   39.60
  -9   2  -3  442.36   45.10
  -9   2  -3  486.45   40.10
  -9  -2   3  460.95   41.50
  -9  -2   3  463.35   38.70
   9   2  -3  466.95   42.60
   9   2  -3  467.95   36.70
   9  -2   3  445.06   44.80
   9  -2   3  509.95   43.00
   9  -2   3  426.86   44.30
   9  -2   3  453.05   42.30
   9  -2   3  492.45   41.60
  -9   2  -2  196.58   27.60
  -9   2  -2  257.17   35.90
  -9  -2   2  207.38   24.90
  -9   2  -2  206.88   31.90
  -9  -2   2  229.18   24.50
  -9   2  -2  191.28   30.70
  -9  -2   2  210.98   21.20
  -9  -2   2  233.58   34.00
  -9   2  -2  230.88   22.00
  -9   2  -2  189.18   30.60
  -9  -2   2  213.18   23.30
   9  -2   2  314.67   27.00
   9   2  -2  252.97   22.80
   9  -2   2  285.67   31.50
   9   2  -2  254.27   26.80
   9  -2   2  229.08   26.90
   9   2  -2  272.07   21.60
   9  -2   2  268.97   24.50
  -9   2  -1  105.29   10.80
  -9   2  -1  135.79   24.00
  -9   2  -1  121.09   22.90
  -9  -2   1  118.59   10.70
  -9  -2   1  127.89   11.00
  -9   2  -1  136.79   22.50
  -9   2  -1  140.69   21.10
  -9   2  -1  137.69   22.80
  -9  -2   1  133.99   15.70
  -9  -2   1  118.29   17.30
  -9  -2   1  137.69   20.30
   9  -2   1  173.38   17.80
   9  -2   1  153.38   25.00
   9  -2   1  164.48   26.50
   9  -2   1  147.09   21.60
   9   2  -1  131.79   14.70
   9  -2   1  156.88   13.00
  -9   2   0  848.12   53.29
  -9  -2   0  859.71   45.60
  -9   2   0  892.21   48.40
  -9  -2   0  876.11   45.20
  -9   2   0  890.21   50.09
  -9   2   0  939.21   52.19
  -9  -2   0  855.01   47.50
  -9  -2   0  904.31   48.30
   9  -2   0  839.12   49.00
   9  -2   0  836.92   45.30
   9  -2   0  881.41   49.50
   9   2   0  897.21   44.30
   9  -2   0  922.31   54.99
   9   2   0  900.91   47.70
  -9  -2  -1  154.38   22.30
  -9  -2  -1  183.38   26.30
  -9  -2  -1  110.99   25.40
  -9  -2  -1  165.68   21.80
  -9  -2  -1  146.79   13.60
  -9   2   1  143.29   13.40
  -9  -2  -1  136.69   18.90
  -9   2   1  156.48   33.50
  -9   2   1  143.19   23.60
  -9   2   1  165.38   19.20
   9  -2  -1   99.99   17.40
   9  -2  -1  103.69   20.90
   9   2   1  144.59   16.60
   9   2   1  116.99    9.40
   9   2   1  142.89   20.60
   9   2   1  145.59   10.50
   9  -2  -1  127.69   18.40
   9  -2  -1  122.69    8.40
  -9  -2  -2  223.98   23.70
  -9   2   2  239.08   38.30
  -9  -2  -2  280.57   28.40
  -9   2   2  259.27   27.80
  -9   2   2  250.47   35.20
  -9  -2  -2  268.37   30.90
  -9  -2  -2  273.27   38.20
  -9   2   2  219.58   25.70
   9  -2  -2  220.48   32.80
   9  -2  -2  201.88   23.80
   9  -2  -2  239.08   33.60
   9  -2  -2  190.48   19.40
   9   2   2  224.48   30.70
   9   2   2  246.68   22.50
   9   2   2  198.08   19.60
  -9   2   3  429.76   39.70
  -9   2   3  470.75   37.40
  -9  -2  -3  537.65   49.00
  -9  -2  -3  441.96   42.70
  -9   2   3  481.35   42.50
  -9   2   3  505.75   46.30
  -9  -2  -3  479.75   48.00
  -9  -2  -3  445.16   39.50
  -9  -2  -3  423.56   42.00
  -9  -2  -3  496.65   40.20
   9  -2  -3  431.26   39.30
   9  -2  -3  490.45   47.00
   9   2   3  428.96   37.60
   9  -2  -3  498.65   38.70
   9   2   3  463.55   36.50
  -9  -2  -4    9.70   18.90
  -9   2   4    3.20   19.90
  -9   2   4    0.40   15.30
  -9   2   4    1.50   12.80
  -9  -2  -4  -10.90   17.20
  -9  -2  -4   28.80   15.00
  -9  -2  -4   -0.80   16.20
  -9   2   4   -9.30   14.30
  -9  -2  -4   13.30   16.40
  -9  -2  -4   -5.70   15.40
   9  -2  -4   -2.90   20.60
   9   2   4   -3.60   14.90
   9   2   4   22.60   17.20
   9  -2  -4   16.80   15.90
  -9  -2  -5  127.89   36.20
  -9   2   5   72.39   26.10
  -9  -2  -5  138.79   36.20
  -9  -2  -5   62.79   26.80
  -9   2   5   91.09   28.00
   9  -2  -5  129.69   36.60
   9   2   5  119.69   34.20
   9  -2  -5   51.79   33.50
   9   2   5   53.69   24.50
 -10   2  -5   72.09   27.80
 -10  -2   5   40.80   24.30
 -10   2  -5   55.99   27.10
 -10  -2   5   39.10   24.10
  10   2  -5   43.30   33.80
  10  -2   5   33.40   26.20
  10  -2   5   91.79   30.10
 -10   2  -4  189.58   35.50
 -10  -2   4  168.38   28.20
 -10  -2   4  140.09   35.20
 -10   2  -4  226.08   41.80
 -10   2  -4  187.58   39.70
 -10  -2   4  196.78   33.20
 -10  -2   4  192.38   40.10
  10  -2   4  180.38   34.10
  10  -2   4  169.58   32.60
  10  -2   4  191.08   39.00
  10   2  -4  172.78   38.20
  10   2  -4  178.58   31.50
  10  -2   4  174.78   35.90
 -10  -2   3   34.20   16.80
 -10   2  -3    3.50   12.70
 -10  -2   3   15.80   13.80
 -10   2  -3   17.90   17.30
 -10  -2   3   24.80   15.40
 -10   2  -3   14.60   16.60
 -10   2  -3   19.00   15.10
 -10   2  -3    7.40   16.20
 -10  -2   3   21.10   12.00
  10   2  -3   18.80   12.00
  10  -2   3   35.20   18.40
  10   2  -3   21.10   16.00
  10  -2   3   39.80   19.00
  10  -2   3   17.50   15.90
  10   2  -3   36.20   15.70
  10  -2   3   24.80   15.30
 -10   2  -2   43.60   12.30
 -10   2  -2   79.19   23.30
 -10  -2   2   62.09   15.30
 -10   2  -2   42.30   15.00
 -10  -2   2   74.69   18.00
 -10   2  -2   53.69   17.70
 -10  -2   2   70.99   17.30
 -10   2  -2   29.90   19.00
 -10  -2   2   62.49   13.80
  10  -2   2   62.69   20.10
  10  -2   2   60.69   15.80
  10   2  -2   65.59   17.80
  10   2  -2   31.60   10.00
  10  -2   2   49.00   16.60
  10  -2   2   66.89   15.30
  10   2  -2   38.60   12.60
 -10   2  -1  130.49   23.10
 -10  -2   1  110.99   20.10
 -10   2  -1  149.69   25.10
 -10  -2   1  129.39   19.30
 -10   2  -1  130.69   10.60
 -10   2  -1  133.49   26.10
 -10   2  -1  128.19   24.30
 -10  -2   1  126.59   11.80
 -10   2  -1  125.59   21.00
 -10  -2   1  147.69   20.20
  10  -2   1  111.29   23.00
  10  -2   1  121.69   18.50
  10   2  -1  120.29   16.30
 -10   2   0  488.45   35.60
 -10   2   0  465.25   33.20
 -10  -2   0  490.15   33.20
 -10  -2   0  443.06   31.20
 -10  -2   0  469.15   33.20
 -10   2   0  486.45   39.20
 -10  -2   0  474.05   30.70
 -10   2   0  452.35   35.50
  10  -2   0  468.95   35.10
  10   2   0  438.66   28.90
  10  -2   0  456.75   37.10
  10  -2   0  450.35   30.60
 -10  -2  -1  134.49   12.70
 -10   2   1  124.99   13.80
 -10   2   1  139.09   23.00
 -10  -2  -1  133.49   25.90
 -10   2   1  130.09   20.90
 -10  -2  -1  123.09   22.50
 -10  -2  -1  136.29   21.30
 -10  -2  -1  120.89   19.90
  10  -2  -1  142.39   19.70
  10   2   1  135.29   21.40
  10   2   1  145.19   19.60
  10  -2  -1  119.59   24.00
  10  -2  -1  125.09   19.90
 -10   2   2   40.40   15.00
 -10   2   2   52.39   17.90
 -10  -2  -2   51.19   15.30
 -10   2   2   25.40   15.00
 -10  -2  -2   50.69   14.50
 -10  -2  -2   43.10   18.10
 -10  -2  -2   50.19   18.50
 -10  -2  -2   32.70   14.80
  10  -2  -2   47.10   14.20
  10   2   2   30.00    9.60
  10  -2  -2   75.29   21.70
  10  -2  -2   44.90   12.60
  10   2   2   49.20   12.10
  10   2   2   64.19   17.40
  10  -2  -2   48.70   14.20
 -10  -2  -3   13.90   15.30
 -10  -2  -3   37.50   17.90
 -10   2   3   20.50   13.00
 -10  -2  -3   31.50   13.90
 -10   2   3   13.60   15.10
 -10   2   3   38.00   19.50
 -10  -2  -3   33.90   17.70
 -10   2   3   47.20   19.20
 -10  -2  -3   41.00   18.30
  10  -2  -3    0.50   15.30
  10  -2  -3   10.00   12.70
  10   2   3   29.50   14.30
  10  -2  -3   22.00   14.10
  10   2   3   -0.10   11.20
 -10  -2  -4  175.78   34.40
 -10  -2  -4  124.39   31.60
 -10   2   4  118.59   27.80
 -10  -2  -4  195.88   33.70
 -10   2   4  184.68   36.80
 -10   2   4  163.78   28.30
 -10   2   4  176.18   31.70
 -10  -2  -4  187.08   38.30
 -10  -2  -4  146.99   35.70
 -10  -2  -4  169.68   38.70
  10  -2  -4  155.78   30.80
  10  -2  -4  162.28   36.20
  10   2   4  205.98   36.60
  10   2   4  253.87   37.80
 -10   2   5   11.70   19.50
 -10  -2  -5  103.69   29.50
 -10   2   5   38.80   27.40
 -10  -2  -5   89.89   32.80
  10  -2  -5   62.99   34.40
  10   2   5   25.30   24.20
  10   2   5   69.49   29.80
  10  -2  -5   61.99   29.20
 -11   2  -5    8.60   31.00
 -11   2  -5   46.50   29.00
 -11  -2   5   29.90   23.00
 -11   2  -5    3.80   27.80
 -11  -2   5   -3.50   22.30
  11  -2   5    7.20   25.50
  11   2  -5   38.60   36.20
  11  -2   5  -14.00   20.60
 -11  -2   4   -9.00   14.70
 -11  -2   4   -5.50   14.90
 -11  -2   4   24.30   24.10
 -11   2  -4   -8.10   17.50
 -11   2  -4  -23.10   16.60
 -11  -2   4   -8.20   14.60
 -11   2  -4    7.80   18.70
  11  -2   4   -0.30   16.50
  11  -2   4    8.00   18.00
  11   2  -4    3.70   19.50
  11  -2   4    9.60   19.80
 -11   2  -3  136.59   32.30
 -11   2  -3  154.88   25.90
 -11  -2   3  100.09   25.20
 -11   2  -3  107.09   32.40
 -11  -2   3  118.59   23.50
 -11  -2   3  121.39   26.60
 -11  -2   3  118.09   22.00
 -11   2  -3  112.79   34.90
 -11   2  -3   82.49   24.40
  11   2  -3  203.58   26.60
  11   2  -3  139.79   22.80
  11  -2   3  166.68   29.70
  11   2  -3  151.28   28.40
 -11   2  -2  212.18   30.40
 -11  -2   2  210.48   19.40
 -11  -2   2  267.27   27.40
 -11   2  -2  203.18   20.30
 -11   2  -2  134.29   28.20
 -11   2  -2  212.08   33.80
 -11   2  -2  195.18   35.70
 -11  -2   2  208.08   24.30
 -11  -2   2  197.98   29.10
  11  -2   2  221.08   21.80
  11  -2   2  161.68   27.70
  11   2  -2  204.88   23.00
  11   2  -2  185.08   27.20
  11  -2   2  198.38   26.30
  11  -2   2  225.78   34.60
 -11  -2   1  463.25   34.00
 -11   2  -1  504.05   39.70
 -11  -2   1  505.75   27.70
 -11   2  -1  537.65   42.60
 -11   2  -1  548.45   47.20
 -11   2  -1  568.54   43.90
 -11   2  -1  544.05   45.60
 -11  -2   1  538.25   36.40
 -11  -2   1  531.25   38.70
  11  -2   1  511.55   42.70
  11   2  -1  519.65   33.00
  11   2  -1  459.35   38.70
  11  -2   1  506.75   34.30
  11  -2   1  548.65   39.30
 -11   2   0    8.00   10.40
 -11   2   0   -0.50    9.40
 -11  -2   0    5.90    8.90
 -11   2   0   14.80   12.80
 -11  -2   0   -3.90    9.80
 -11  -2   0   21.30   11.00
 -11   2   0   10.00   10.70
 -11  -2   0    8.60    8.10
  11   2   0    6.60    6.90
  11  -2   0   18.00    8.70
  11  -2   0   34.30   15.30
 -11  -2  -1  494.55   35.30
 -11  -2  -1  499.65   45.80
 -11  -2  -1  521.45   25.90
 -11   2   1  466.95   29.20
 -11   2   1  525.05   40.10
 -11  -2  -1  516.05   39.20
 -11   2   1  499.85   38.60
 -11   2   1  598.54   45.40
 -11  -2  -1  529.25   43.50
  11   2   1  507.25   37.70
  11   2   1  496.75   34.40
  11  -2  -1  428.86   40.60
  11  -2  -1  518.75   33.50
 -11  -2  -2  173.98   20.60
 -11   2   2  179.48   32.80
 -11  -2  -2  172.28   28.90
 -11  -2  -2  197.18   34.90
 -11   2   2  190.58   29.90
 -11   2   2  180.18   28.50
 -11  -2  -2  180.58   29.40
  11   2   2  225.48   25.40
  11  -2  -2  237.58   27.80
  11   2   2  181.38   18.70
  11   2   2  230.68   32.20
  11  -2  -2  245.08   24.40
  11  -2  -2  279.87   31.90
  11  -2  -2  241.98   18.50
 -11   2   3  172.88   31.60
 -11  -2  -3  203.78   33.30
 -11  -2  -3  158.28   33.00
 -11  -2  -3  130.09   25.80
 -11  -2  -3  173.98   34.10
 -11   2   3  167.58   33.30
 -11  -2  -3  191.98   29.30
 -11   2   3  171.78   29.60
  11  -2  -3  142.89   36.00
  11  -2  -3  158.78   27.00
  11   2   3  184.28   25.90
  11   2   3  141.79   23.30
  11  -2  -3  139.19   22.90
 -11  -2  -4   -9.20   13.20
 -11  -2  -4   19.40   16.80
 -11  -2  -4   34.70   24.50
 -11  -2  -4   -2.20   16.30
 -11   2   4   21.10   19.20
 -11  -2  -4    6.90   18.00
 -11  -2  -4   20.80   22.70
 -11   2   4   26.70   22.80
  11   2   4   14.50   17.20
  11  -2  -4   15.30   16.70
  11  -2  -4   12.20   20.50
 -11  -2  -5   59.29   34.20
 -11  -2  -5   15.70   24.50
 -11  -2  -5   53.09   27.90
  11   2   5   14.20   24.60
  11  -2  -5   61.29   40.20
 -12  -2   4  144.29   29.00
 -12  -2   4   81.29   24.70
 -12   2  -4  213.38   42.50
 -12  -2   4  172.18   35.90
 -12   2  -4  118.79   36.10
  12  -2   4  114.09   34.40
  12   2  -4  139.99   29.20
  12   2  -4  139.49   32.10
  12  -2   4  186.18   34.40
  12  -2   4  155.48   39.30
  12  -2   4  128.69   33.20
 -12   2  -3   80.99   21.40
 -12   2  -3   69.99   26.70
 -12  -2   3  145.39   29.00
 -12   2  -3   76.49   25.40
 -12   2  -3   78.99   26.20
 -12   2  -3   94.99   20.40
 -12  -2   3   54.89   20.20
  12   2  -3   88.79   19.60
  12  -2   3   60.59   20.90
  12   2  -3   95.99   20.60
  12   2  -3   53.09   21.70
  12  -2   3  129.89   29.60
  12  -2   3   94.59   28.30
 -12   2  -2   36.10   10.90
 -12   2  -2   38.70   21.10
 -12  -2   2   43.00   16.00
 -12   2  -2   24.30   13.50
 -12   2  -2   54.99   21.90
 -12  -2   2   41.20   10.00
 -12   2  -2   44.70   18.80
 -12  -2   2   31.50   17.10
 -12  -2   2   27.30   12.90
  12   2  -2   38.20   12.50
  12   2  -2   49.40   16.90
  12  -2   2   20.50   15.40
  12  -2   2   31.70   16.20
  12  -2   2   45.80   15.50
 -12  -2   1   25.30   11.40
 -12   2  -1    6.80   15.00
 -12   2  -1   28.40   16.20
 -12   2  -1   22.70   14.30
 -12  -2   1   21.80   13.20
 -12  -2   1   24.80    8.20
 -12   2  -1   25.50   16.40
 -12  -2   1   23.10   11.60
 -12   2  -1    9.40   15.80
  12   2  -1   29.10   10.20
  12  -2   1   52.59   17.70
  12  -2   1   23.00   12.40
  12  -2   1   50.29   12.90
  12   2  -1   48.90   15.50
 -12  -2   0  440.56   42.00
 -12  -2   0  413.46   34.30
 -12   2   0  394.16   34.50
 -12   2   0  374.86   38.90
 -12   2   0  396.76   33.00
 -12  -2   0  421.06   31.20
 -12   2   0  455.75   38.90
 -12  -2   0  423.86   33.10
  12   2   0  423.36   29.50
  12  -2   0  434.26   29.00
  12  -2   0  502.65   41.80
  12   2   0  412.26   33.10
 -12  -2  -1   28.40   14.20
 -12  -2  -1   17.90   18.00
 -12   2   1   15.00   12.70
 -12   2   1   31.50   14.90
 -12   2   1   55.59   16.10
 -12  -2  -1   41.10    4.90
 -12  -2  -1   32.60   14.10
 -12  -2  -1   37.60   15.10
 -12  -2  -1   38.70   13.50
  12  -2  -1   19.70   10.60
  12   2   1   22.70   11.60
  12   2   1   37.80   12.40
  12  -2  -1   15.30   13.70
 -12  -2  -2   48.10   15.20
 -12   2   2   18.00   14.00
 -12  -2  -2   67.79   20.20
 -12   2   2   13.70   15.70
 -12  -2  -2   41.40   13.20
 -12  -2  -2   18.00   14.20
 -12   2   2   45.80   21.00
 -12  -2  -2   58.29   21.90
  12  -2  -2   40.00   24.20
  12  -2  -2   21.30   13.30
  12   2   2   50.59   16.50
  12   2   2   19.90   14.60
  12   2   2   38.80    9.30
  12  -2  -2   51.59   19.10
  12  -2  -2   44.10    8.30
  12   2   2   46.60    8.70
 -12  -2  -3  103.39   21.50
 -12  -2  -3  109.59   28.30
 -12  -2  -3   92.89   29.80
 -12   2   3   76.99   21.80
 -12   2   3   83.99   29.00
 -12  -2  -3   81.79   20.70
 -12   2   3   56.09   24.40
 -12  -2  -3   36.00   22.50
  12  -2  -3   59.79   17.60
  12   2   3   71.59   16.20
  12   2   3   41.50   21.70
 -12  -2  -4  151.18   40.40
 -12  -2  -4  149.79   33.10
 -12   2   4  176.08   36.00
 -12   2   4  143.39   44.20
 -12  -2  -4  191.68   38.60
 -12  -2  -4  132.39   44.10
 -12  -2  -4  190.78   41.10
 -12   2   4  130.79   38.70
  12  -2  -4  113.79   32.50
  12  -2  -4  139.29   30.90
  12   2   4  111.69   27.40
 -13  -2   4   22.80   18.20
 -13   2  -4   -5.80   22.70
 -13  -2   4    7.20   16.80
 -13   2  -4   10.00   22.30
  13  -2   4  -21.60   23.60
  13  -2   4   -4.30   23.70
  13  -2   4  -35.70   17.40
  13  -2   4  -24.30   17.80
  13   2  -4   18.60   29.10
 -13   2  -3   62.19   26.10
 -13  -2   3   65.49   22.60
 -13  -2   3  116.49   22.60
 -13   2  -3   65.89   26.30
 -13  -2   3   32.70   21.10
 -13   2  -3   62.19   28.10
 -13   2  -3   64.89   23.40
 -13   2  -3  119.39   24.20
  13  -2   3  102.09   25.80
  13   2  -3   59.69   19.20
  13  -2   3   95.69   24.70
  13  -2   3   89.19   26.00
  13   2  -3   56.99   22.50
  13   2  -3   85.29   18.30
  13  -2   3   84.99   20.90
 -13  -2   2  321.07   34.90
 -13   2  -2  251.77   39.60
 -13   2  -2  335.87   35.90
 -13   2  -2  306.97   23.60
 -13  -2   2  312.27   33.10
 -13   2  -2  349.47   39.80
 -13   2  -2  264.37   43.00
 -13  -2   2  308.47   31.10
  13  -2   2  296.17   29.60
  13  -2   2  328.37   36.50
  13   2  -2  305.67   28.80
  13   2  -2  345.57   34.00
 -13  -2   1   46.10   14.20
 -13  -2   1   38.60   14.90
 -13   2  -1   15.10   13.60
 -13  -2   1   28.80   14.50
 -13   2  -1   50.19   18.10
 -13   2  -1   35.90   20.90
 -13   2  -1   66.89   19.20
 -13  -2   1   21.30    8.60
  13  -2   1   76.49   22.50
  13   2  -1   49.30   15.80
  13  -2   1   54.39   16.60
  13  -2   1   53.19   13.80
 -13  -2   0   52.19   20.40
 -13   2   0   24.80   14.60
 -13   2   0   37.20   14.10
 -13  -2   0   12.70   11.50
 -13  -2   0   16.40   10.40
 -13   2   0   26.30   15.40
 -13  -2   0   47.90   15.00
 -13  -2   0    1.30   11.00
 -13   2   0   38.20   16.10
  13   2   0   26.60   11.40
  13   2   0   42.40   13.50
  13  -2   0   32.50   15.60
 -13   2   1   62.19   13.00
 -13  -2  -1   64.69   17.60
 -13   2   1   44.50   17.00
 -13  -2  -1   60.09   16.00
 -13   2   1   85.39   21.80
 -13  -2  -1   19.70   17.50
 -13   2   1   43.30   17.30
 -13  -2  -1   44.90   17.10
 -13  -2  -1   35.00   20.20
  13   2   1   54.79   16.10
  13  -2  -1   18.70   12.80
  13   2   1   43.20   13.30
  13  -2  -1   32.20   17.80
 -13   2   2  312.07   34.40
 -13   2   2  371.56   40.40
 -13  -2  -2  261.17   37.70
 -13  -2  -2  359.96   34.60
 -13  -2  -2  398.16   38.80
 -13  -2  -2  353.06   26.60
 -13  -2  -2  392.56   44.80
 -13   2   2  366.16   37.50
  13  -2  -2  260.07   38.60
  13   2   2  245.28   35.50
  13   2   2  365.96   33.90
 -13  -2  -3   97.29   27.40
 -13  -2  -3   88.09   29.20
 -13   2   3   98.09   25.10
 -13  -2  -3  104.79   29.00
 -13   2   3  101.69   28.80
 -13   2   3   93.29   26.10
 -13  -2  -3   88.09   22.00
 -13  -2  -3  132.79   23.70
  13  -2  -3   77.69   25.60
  13   2   3   70.29   15.40
  13  -2  -3   91.09   25.50
  13  -2  -3   80.59   17.10
  13   2   3   54.29   14.60
 -13  -2  -4    7.60   22.00
 -13  -2  -4   -3.70   15.30
 -13  -2  -4    2.70   19.60
 -13  -2  -4   18.30   24.60
 -13   2   4   42.90   25.00
  13   2   4    6.40   18.30
  13  -2  -4    2.60   18.60
  13  -2  -4   17.30   25.90
 -14  -2   4   76.09   27.20
 -14  -2   4   65.89   21.20
 -14   2  -4   94.79   31.70
  14  -2   4   13.70   23.10
  14  -2   4   50.19   32.60
 -14  -2   3   15.00   13.90
 -14   2  -3  -14.60   27.40
 -14   2  -3  -16.80   18.50
 -14   2  -3   -7.80   20.80
  14   2  -3   32.20   21.20
  14   2  -3   31.80   15.20
  14  -2   3    9.50   18.80
  14  -2   3   30.50   16.80
  14  -2   3  -19.80   19.70
 -14   2  -2   30.10   17.20
 -14  -2   2   25.40   15.50
 -14  -2   2   11.20   12.30
 -14   2  -2   10.40   15.50
 -14  -2   2   15.10   15.20
 -14   2  -2   11.40   22.10
 -14   2  -2   27.50    8.10
 -14   2  -2   16.00   20.10
  14  -2   2   22.60   16.50
  14  -2   2   16.70   13.80
  14   2  -2   23.30   16.10
  14  -2   2   40.20   15.20
  14   2  -2   16.00   12.00
 -14   2  -1  100.79   22.90
 -14   2  -1  113.99   27.60
 -14   2  -1  158.78   32.40
 -14  -2   1  124.59   16.10
 -14   2  -1  114.59   26.60
 -14  -2   1  136.79   24.50
 -14  -2   1  137.99   24.80
 -14  -2   1  117.79   20.00
  14   2  -1  115.99   29.60
  14  -2   1  108.39   17.00
  14   2  -1   89.49   16.70
  14  -2   1  123.29   28.30
 -14   2   0  160.68   30.00
 -14   2   0  149.99   25.50
 -14  -2   0  143.99   25.60
 -14  -2   0  213.08   38.70
 -14  -2   0  203.18   28.30
 -14  -2   0  167.68   26.70
 -14   2   0  210.58   33.70
 -14  -2   0  206.38   23.50
  14   2   0  223.08   26.00
  14  -2   0  111.99   23.20
  14   2   0  171.68   20.40
  14  -2   0  159.88   30.20
 -14  -2  -1  122.69   22.50
 -14   2   1  133.89   17.60
 -14  -2  -1  101.39   23.00
 -14   2   1  118.29   24.20
 -14  -2  -1  167.98   35.80
 -14   2   1  125.99   27.20
 -14   2   1  122.69   26.60
 -14  -2  -1  123.39   24.70
  14   2   1  135.79   21.30
  14  -2  -1  139.09   29.70
  14  -2  -1  139.59   14.80
  14  -2  -1  149.99   24.80
  14   2   1  135.99   24.70
 -14  -2  -2   55.19   17.40
 -14  -2  -2    5.00   19.10
 -14   2   2    9.40   15.40
 -14  -2  -2   22.80   18.30
 -14   2   2    3.70   13.80
 -14   2   2    8.90   17.40
 -14  -2  -2   -8.50   15.30
  14  -2  -2    9.40   15.60
  14   2   2   11.60   13.00
  14  -2  -2   10.80   14.30
  14   2   2   12.70   14.60
 -14  -2  -3   -6.90   18.80
 -14   2   3   34.00   19.10
 -14   2   3   16.20   17.90
 -14  -2  -3    1.70   20.20
 -14  -2  -3   27.60   19.50
 -14  -2  -3   69.79   26.80
 -14   2   3  -23.50   21.70
 -14  -2  -3   18.40   20.30
  14   2   3    8.90   10.60
  14   2   3   43.30   17.30
  14  -2  -3   16.40   19.80
 -14  -2  -4   65.09   24.50
 -14   2   4   32.50   25.50
 -14  -2  -4   42.90   32.30
 -14  -2  -4   93.39   32.70
 -14  -2  -4   88.79   33.30
  14  -2  -4   11.20   32.80
  14   2   4   34.00   36.20
 -15  -2   3   49.20   17.90
 -15  -2   3   67.19   22.10
 -15   2  -3   67.09   28.90
 -15   2  -3  112.19   33.30
  15  -2   3   58.49   21.90
  15  -2   3   49.60   25.60
  15   2  -3   21.50   23.00
  15  -2   3   93.69   29.60
 -15  -2   2   75.49   22.00
 -15   2  -2   63.59   27.00
 -15   2  -2   75.69   25.90
 -15   2  -2   29.20   18.40
 -15   2  -2   92.89   29.00
 -15  -2   2   75.89   23.20
 -15  -2   2   73.09   18.20
  15   2  -2   44.70   17.90
  15  -2   2   67.79   20.20
  15  -2   2   41.10   18.70
  15  -2   2   36.40   17.10
  15   2  -2   75.09   20.80
  15  -2   2   75.79   26.20
 -15   2  -1   32.50   18.50
 -15   2  -1   21.50   20.30
 -15   2  -1   38.60   22.10
 -15  -2   1   18.10   13.00
 -15  -2   1    7.20   15.00
 -15   2  -1   -7.30   18.50
 -15  -2   1   61.99   18.10
  15  -2   1   34.80   13.20
  15   2  -1   61.19   14.90
  15  -2   1   29.50   17.30
  15  -2   1   51.19   12.70
  15  -2   1   54.49   21.10
 -15   2   0   -8.50   10.50
 -15   2   0    3.70   13.40
 -15   2   0  -14.50   17.30
 -15  -2   0   -7.20   11.10
 -15  -2   0    5.20   18.90
 -15  -2   0   52.29   28.20
 -15  -2   0   20.50   12.70
 -15  -2   0   -6.10   11.40
 -15   2   0  -23.70   12.70
  15  -2   0   18.40   17.50
  15   2   0    0.60   10.30
  15  -2   0    5.00   13.30
  15   2   0   -2.70   12.80
 -15  -2  -1   75.99   18.40
 -15   2   1   22.00   16.00
 -15   2   1   92.29   22.60
 -15  -2  -1   54.89   18.30
 -15   2   1   52.69   12.00
 -15   2   1   18.30   18.70
 -15  -2  -1   38.10   19.30
 -15  -2  -1   46.30   24.10
  15  -2  -1   23.10   14.80
  15  -2  -1   17.70   18.90
  15   2   1   26.70   15.00
 -15   2   2   26.20   22.20
 -15   2   2   80.39   25.60
 -15   2   2  112.59   25.20
 -15  -2  -2  113.79   32.60
 -15  -2  -2   44.20   22.10
 -15  -2  -2   76.19    9.00
 -15  -2  -2   21.80   17.90
  15   2   2   59.09   20.20
  15   2   2   28.30   20.90
  15  -2  -2   75.99   23.00
  15  -2  -2   36.30   20.50
 -15   2   3    1.80   20.20
 -15  -2  -3   47.50   24.70
 -15  -2  -3   49.99   27.10
  15  -2  -3   32.70   27.70
 -16  -2   3   23.00   23.40
 -16   2  -3   10.50   25.70
 -16   2  -3   74.89   29.40
  16  -2   3   32.20   30.00
  16  -2   3   38.20   32.80
 -16  -2   2    7.90   15.00
 -16   2  -2   -2.10   22.20
 -16   2  -2   18.50   19.00
  16   2  -2  -11.70   16.60
  16  -2   2    8.20   19.90
  16  -2   2  -12.60   20.90
 -16   2  -1   81.49   24.40
 -16  -2   1  100.19   20.10
 -16   2  -1  112.79   29.90
 -16   2  -1   41.70   28.20
 -16  -2   1   98.59   24.60
 -16  -2   1   85.19   22.40
 -16   2  -1   47.80   18.50
 -16  -2   1  159.38   24.90
  16  -2   1   71.59   24.80
  16   2  -1   86.29   18.30
  16  -2   1   61.59   21.30
 -16  -2   0  112.59   25.00
 -16   2   0  109.59   23.60
 -16  -2   0  103.59   23.50
 -16  -2   0   93.69   19.70
 -16   2   0   93.09   29.80
 -16   2   0  102.09   30.50
 -16  -2   0  132.49   24.10
 -16  -2   0   67.09   26.70
 -16   2   0  123.69   25.00
  16  -2   0  110.89   22.30
  16  -2   0  171.38   32.40
  16   2   0  116.79   19.30
 -16  -2  -1   52.39   17.50
 -16  -2  -1   54.69   20.90
 -16   2   1   48.70   25.10
 -16   2   1   25.00   19.00
 -16   2   1   81.89   21.80
 -16  -2  -1   67.19   26.60
 -16   2   1   50.29   12.80
 -16  -2  -1   64.19   19.20
  16  -2  -1   48.10   21.60
  16   2   1   79.19   19.30
  16  -2  -1   90.19   26.80
  16   2   1   71.29   21.00
 -16   2   2   14.60   16.50
 -16   2   2    3.90   17.90
 -16  -2  -2  -26.80   17.80
 -16  -2  -2   -0.90   16.00
 -16  -2  -2   13.30   18.50
  16  -2  -2   31.10   22.60
  16  -2  -2  -14.40   21.40
  16   2   2   18.00   19.10
 -16   2   3   13.00   21.20
 -16  -2  -3   36.30   26.10
 -16  -2  -3   47.90   28.80
  16  -2  -3  -31.40   27.30
 -17   2  -2   46.40   23.50
 -17   2  -2   16.70   21.00
 -17  -2   2   53.09   21.90
  17  -2   2   -2.00   25.90
 -17  -2   1   66.59   23.00
 -17   2  -1   51.79   23.50
 -17   2  -1   55.99   24.40
 -17  -2   1   48.70   17.20
  17  -2   1   74.39   26.90
 -17  -2   0   -4.90   12.80
 -17   2   0   10.00   18.00
 -17   2   0    0.10   15.40
 -17  -2   0  -16.70   15.30
 -17   2   0   -3.20   13.50
 -17  -2   0   -4.40   20.30
  17  -2   0   -5.10   23.50
  17   2   0  -35.50   19.10
  17  -2   0   -0.50   20.10
 -17  -2  -1   34.70   22.70
 -17  -2  -1   30.50   20.50
 -17  -2  -1  103.69   22.40
 -17   2   1   11.20   19.20
  17  -2  -1   43.90   25.60
  17   2   1   38.10   19.60
 -17  -2  -2   21.80   19.40
 -17  -2  -2   42.00   24.40
 -17   2   2   15.10   22.00
  17  -2  -2   27.40   27.30
 -18   2  -1   53.09   22.80
 -18  -2   1   34.70   27.90
 -18  -2   1    8.70   17.60
 -18   2  -1   56.79   24.00
  18  -2   1    1.40   27.20
 -18  -2   0   49.00   21.60
 -18   2   0    2.90   22.20
 -18   2   0    5.00   21.90
 -18  -2   0   15.40   18.90
 -18  -2   0   34.40   31.00
  18  -2   0   39.30   26.90
 -18   2   1   26.20   20.80
 -18  -2  -1   64.69   26.20
 -18  -2  -1   79.19   30.90
   0   3  -6   16.00   28.50
   0   3  -6  -21.80   26.50
   0   3  -6  -43.20   21.30
   0  -3   5   69.59   25.40
   0   3  -5   73.89   32.10
   0   3  -5   96.29   29.40
   0  -3   5  125.69   33.90
   0   3  -5  101.89   29.10
   0  -3   4   -7.30   12.40
   0   3  -4    1.80   12.70
   0   3  -4   -2.40   14.00
   0  -3   4    4.00   13.40
   0  -3   4   25.50   17.80
   0   3  -4    4.80   14.30
   0   3  -4   13.80   13.50
   0   3  -4  -10.30   12.30
   0  -3   3  871.11   56.79
   0   3  -3  899.21   55.29
   0  -3   3  957.80   57.39
   0  -3   3  937.11   57.99
   0   3  -3  925.61   54.49
   0   3  -3  929.71   53.09
   0   3  -3  895.61   56.09
   0  -3   3  869.91   53.39
   0   3  -3  903.01   60.79
   0  -3   3  826.32   51.19
   0   3  -3  869.41   53.79
   0   3  -3  907.01   56.79
   0  -3   2  984.60   52.79
   0  -3   2 1044.20   55.49
   0   3  -2 1001.60   54.29
   0  -3   2 1071.39   55.19
   0   3  -2  987.40   57.49
   0   3  -2 1144.09   54.59
   0  -3   2 1044.90   51.59
   0   3  -2 1016.20   52.39
   0   3  -2 1041.00   55.19
   0   3  -2 1023.70   51.99
   0  -3   2 1067.29   56.19
   0  -3   2 1067.99   54.39
   0  -3   1  527.65   26.00
   0   3  -1  553.64   26.60
   0  -3   1  607.44   30.40
   0  -3   1  581.34   30.00
   0   3  -1  567.34   30.30
   0   3  -1  555.04   29.30
   0  -3   1  561.44   30.70
   0   3  -1  566.14   29.60
   0  -3   1  564.84   30.40
   0   3  -1  561.34   28.90
   0  -3   1  579.64   29.40
   0   3  -1  559.44   30.20
   0   3   0    4.80    3.50
   0  -3   0    2.00    2.60
   0  -3   0   -1.50    2.40
   0   3   0   -1.60    2.60
   0  -3   0    0.80    3.30
   0  -3   0    3.70    4.20
   0   3   0    3.80    2.70
   0   3   0    0.70    2.30
   0  -3   0   -1.50    2.10
   0   3   0   -0.40    3.10
   0   3   1  542.65   28.90
   0   3   1  550.84   30.20
   0   3   1  558.44   31.60
   0  -3  -1  517.75   30.50
   0  -3  -1  523.15   30.80
   0  -3  -1  546.35   29.90
   0  -3  -1  531.05   29.20
   0   3   1  558.64   30.20
   0  -3  -1  554.64   29.20
   0   3   1  552.44   29.10
   0  -3  -2  983.40   55.99
   0   3   2 1013.70   53.49
   0   3   2 1041.50   58.19
   0   3   2 1075.29   55.69
   0  -3  -2 1038.60   58.29
   0   3   2 1046.90   55.79
   0  -3  -2 1086.39   55.59
   0   3   2 1019.30   54.49
   0  -3  -2 1022.00   54.99
   0  -3  -2  973.10   53.59
   0  -3  -3  952.80   57.09
   0   3   3  865.61   56.09
   0  -3  -3  876.51   58.49
   0  -3  -3  855.01   55.79
   0   3   3  944.41   56.49
   0   3   3  946.91   57.29
   0   3   3  885.11   55.69
   0   3   3  917.41   57.89
   0  -3  -3  952.20   62.89
   0   3   3  862.51   60.29
   0   3   4    7.60   15.90
   0  -3  -4   -1.80   12.70
   0  -3  -4   28.90   16.20
   0  -3  -4   30.10   15.60
   0   3   4    4.90   14.00
   0  -3  -4   16.70   15.10
   0  -3  -4   44.40   20.60
   0   3   5  100.19   30.00
   0  -3  -5   97.09   31.40
   0   3   5  186.28   36.50
   0  -3  -5   72.19   29.20
   0  -3  -5   55.39   25.20
   0  -3  -6   20.20   30.00
   0   3   6   16.30   23.00
   0  -3  -6    6.30   24.40
   0  -3  -6  -45.30   28.50
  -1   3  -6   14.80   27.10
  -1  -3   6    4.60   25.20
  -1   3  -6  -25.30   26.30
  -1   3  -6   -2.30   22.20
   1   3  -6  -18.10   29.00
   1   3  -6   -5.60   23.80
   1   3  -6    4.60   23.70
  -1   3  -5   20.00   23.30
  -1   3  -5   66.89   26.00
  -1   3  -5   94.39   32.20
  -1  -3   5   28.10   19.90
  -1  -3   5   37.20   24.70
   1  -3   5   29.90   18.80
   1   3  -5   79.19   29.70
   1  -3   5   55.39   25.50
   1   3  -5   67.39   25.70
   1   3  -5   43.00   23.20
  -1   3  -4  326.17   35.40
  -1   3  -4  326.97   47.40
  -1   3  -4  356.66   37.70
  -1  -3   4  302.27   42.60
  -1  -3   4  357.56   33.80
  -1  -3   4  302.57   37.30
  -1   3  -4  330.17   35.60
  -1   3  -4  314.77   33.90
   1   3  -4  370.46   37.70
   1  -3   4  311.07   43.50
   1  -3   4  349.37   39.10
   1   3  -4  373.26   35.00
   1  -3   4  327.47   35.10
   1   3  -4  277.07   39.00
  -1  -3   3   74.79   17.30
  -1  -3   3  104.09   22.80
  -1   3  -3   69.69   18.00
  -1   3  -3   99.79   18.90
  -1  -3   3   70.79   18.90
  -1   3  -3   79.79   18.60
  -1  -3   3   64.99   18.10
  -1   3  -3  116.09   20.60
  -1   3  -3  121.19   25.80
  -1   3  -3   96.49   19.80
  -1   3  -3  144.59   23.30
   1  -3   3   55.59   19.00
   1   3  -3   77.09   18.20
   1  -3   3   83.49   17.70
   1   3  -3   70.79   17.90
   1  -3   3   71.89   18.70
   1   3  -3   78.29   18.50
   1   3  -3   81.59   17.10
   1   3  -3   57.19   19.50
   1   3  -3   57.59   14.10
   1   3  -3   84.79   19.10
  -1  -3   2  280.07   24.30
  -1  -3   2  298.47   24.60
  -1   3  -2  277.17   24.50
  -1   3  -2  278.07   22.30
  -1  -3   2  302.47   22.80
  -1   3  -2  298.87   25.10
  -1   3  -2  282.37   25.30
  -1   3  -2  289.87   23.60
  -1  -3   2  303.57   23.00
  -1   3  -2  285.27   23.90
   1  -3   2  288.17   24.70
   1  -3   2  268.17   24.00
   1   3  -2  290.67   24.20
   1  -3   2  302.77   25.20
   1  -3   2  299.77   25.00
   1  -3   2  300.07   24.40
   1   3  -2  280.87   24.40
   1   3  -2  333.57   24.00
   1   3  -2  267.97   26.00
   1   3  -2  280.07   23.10
   1   3  -2  307.17   23.00
   1   3  -2  327.87   22.70
  -1   3  -1 1213.78   51.39
  -1   3  -1 1206.18   55.89
  -1  -3   1 1224.18   52.39
  -1  -3   1 1234.58   53.59
  -1   3  -1 1193.58   54.79
  -1  -3   1 1214.18   50.89
  -1  -3   1 1230.98   52.89
  -1   3  -1 1263.77   54.49
  -1  -3   1 1225.58   52.59
  -1  -3   1 1202.48   55.19
  -1   3  -1 1212.48   54.89
  -1   3  -1 1222.88   55.29
   1  -3   1 1206.98   54.99
   1   3  -1 1180.38   53.29
   1  -3   1 1165.58   54.59
   1  -3   1 1206.58   56.19
   1   3  -1 1207.68   51.09
   1   3  -1 1220.98   54.99
   1   3  -1 1221.78   52.19
   1   3  -1 1219.28   52.09
   1  -3   1 1137.19   53.79
   1  -3   1 1175.38   50.89
   1  -3   1 1265.67   55.79
  -1   3   0 9894.91  368.26
  -1  -3   0 9821.52  363.26
  -1   3   0 9881.51  366.36
   1  -3   0 9999.00  368.36
   1  -3   0 9740.93  366.26
   1  -3   0 9751.02  366.26
   1   3   0 9689.83  363.36
  -1  -3  -1 1265.47   54.59
  -1   3   1 1217.18   55.29
  -1  -3  -1 1217.08   56.89
  -1   3   1 1245.08   56.99
  -1  -3  -1 1245.48   56.59
  -1   3   1 1149.39   54.89
  -1  -3  -1 1257.77   54.89
  -1   3   1 1242.48   58.19
  -1  -3  -1 1153.48   55.29
   1  -3  -1 1256.47   55.89
   1   3   1 1226.18   54.09
   1   3   1 1209.98   56.59
   1   3   1 1240.98   54.39
   1   3   1 1184.28   53.39
   1  -3  -1 1239.28   55.69
   1  -3  -1 1228.18   57.39
   1  -3  -1 1263.87   58.89
   1   3   1 1292.57   56.59
   1  -3  -1 1223.98   55.39
  -1  -3  -2  288.77   27.00
  -1  -3  -2  320.17   25.80
  -1  -3  -2  321.57   24.90
  -1   3   2  266.67   26.20
  -1  -3  -2  278.07   25.80
  -1   3   2  270.87   25.10
  -1   3   2  310.47   25.00
  -1  -3  -2  275.67   24.60
  -1   3   2  261.97   23.90
   1   3   2  318.87   26.10
   1  -3  -2  276.47   25.20
   1   3   2  262.67   23.50
   1   3   2  284.77   23.50
   1  -3  -2  257.37   26.70
   1  -3  -2  293.97   24.90
   1  -3  -2  290.07   24.70
   1   3   2  295.17   24.60
   1  -3  -2  276.57   24.60
   1   3   2  376.56   29.50
   1   3   2  281.97   25.20
  -1   3   3   80.49   18.40
  -1  -3  -3   67.29   17.60
  -1   3   3   75.59   20.70
  -1  -3  -3   77.49   19.20
  -1  -3  -3   52.89   16.20
  -1   3   3   68.39   18.70
  -1  -3  -3   52.09   16.80
  -1  -3  -3   62.89   17.40
  -1  -3  -3   71.59   18.40
  -1   3   3   44.10   16.60
  -1  -3  -3   69.29   19.10
  -1   3   3   45.90   16.60
   1   3   3  105.59   21.90
   1  -3  -3  113.49   22.30
   1   3   3   90.89   20.30
   1  -3  -3  110.39   21.30
   1  -3  -3   87.19   21.90
   1  -3  -3   72.49   18.40
   1  -3  -3   70.29   21.20
   1   3   3  115.09   22.50
   1   3   3   71.09   18.10
  -1   3   4  334.67   39.00
  -1  -3  -4  312.27   34.70
  -1  -3  -4  313.97   46.70
  -1   3   4  418.36   41.40
  -1  -3  -4  327.37   50.19
  -1  -3  -4  323.47   45.50
  -1  -3  -4  363.66   37.50
   1  -3  -4  310.47   41.70
   1  -3  -4  346.87   37.00
   1  -3  -4  390.46   44.10
   1  -3  -4  323.47   45.10
   1  -3  -4  331.07   44.10
   1   3   4  357.86   39.50
   1   3   4  266.77   41.40
  -1   3   5   95.79   28.60
  -1  -3  -5   74.09   30.00
  -1   3   5  100.59   28.60
  -1  -3  -5   58.89   29.00
  -1  -3  -5  107.09   28.40
   1  -3  -5   79.19   29.40
   1   3   5   55.69   22.30
   1  -3  -5   63.79   26.60
   1   3   5   29.40   21.50
  -1   3   6   43.90   27.60
  -1  -3  -6    2.10   25.80
  -1  -3  -6  -26.60   23.30
  -1  -3  -6   21.50   26.80
   1  -3  -6  -45.80   23.80
   1  -3  -6  -16.50   20.10
   1   3   6  -37.10   20.10
   1  -3  -6  -25.00   24.30
  -2   3  -6  101.49   34.70
  -2   3  -6  123.19   41.90
   2   3  -6   56.99   36.70
   2   3  -6   95.39   37.30
   2   3  -6   56.99   32.30
  -2  -3   5   42.70   22.50
  -2   3  -5   39.00   21.60
  -2   3  -5   31.10   23.00
  -2  -3   5   23.70   16.90
   2  -3   5   38.70   23.40
   2   3  -5   -9.20   20.10
   2   3  -5    6.30   22.00
   2  -3   5   19.70   20.30
  -2   3  -4  108.39   27.70
  -2   3  -4  168.08   29.20
  -2   3  -4  135.79   29.00
  -2   3  -4  130.89   31.20
  -2  -3   4  128.29   24.30
  -2  -3   4  154.98   31.60
  -2  -3   4  162.68   32.60
   2   3  -4  173.98   33.20
   2   3  -4  122.89   23.30
   2  -3   4  194.18   34.60
   2   3  -4  154.88   29.50
   2  -3   4  133.19   26.10
   2  -3   4  108.69   25.90
   2   3  -4  132.19   25.90
  -2   3  -3  438.06   37.70
  -2  -3   3  472.75   34.20
  -2  -3   3  460.55   37.70
  -2   3  -3  451.25   36.00
  -2   3  -3  504.35   43.60
  -2  -3   3  434.86   34.80
  -2  -3   3  511.05   38.40
  -2   3  -3  476.75   36.00
  -2   3  -3  507.35   37.10
  -2   3  -3  425.56   35.90
   2   3  -3  367.66   36.60
   2  -3   3  371.46   35.60
   2   3  -3  324.57   30.40
   2   3  -3  370.16   33.90
   2   3  -3  374.46   34.30
   2   3  -3  335.27   28.10
   2  -3   3  356.66   34.50
   2  -3   3  343.07   32.80
   2   3  -3  389.56   33.30
   2  -3   3  402.86   32.50
  -2   3  -2 1084.79   54.79
  -2  -3   2 1028.50   53.59
  -2   3  -2 1065.89   53.79
  -2  -3   2 1068.29   47.50
  -2  -3   2 1067.89   53.69
  -2   3  -2 1033.90   54.69
  -2   3  -2  989.20   52.09
  -2   3  -2 1020.80   50.19
  -2   3  -2 1026.90   51.69
   2   3  -2  836.92   48.80
   2  -3   2  894.81   50.49
   2  -3   2  862.91   47.70
   2  -3   2  902.71   51.79
   2  -3   2  904.61   51.69
   2  -3   2  845.02   51.59
   2   3  -2  822.42   44.20
   2   3  -2  903.81   49.20
   2   3  -2  893.71   49.30
   2   3  -2  887.01   52.29
   2  -3   2  879.31   51.69
   2   3  -2  863.11   50.09
   2   3  -2  901.01   48.20
  -2   3  -1 1382.26   64.89
  -2  -3   1 1396.46   63.79
  -2   3  -1 1459.45   63.89
  -2   3  -1 1400.76   66.09
  -2   3  -1 1403.06   64.99
  -2  -3   1 1367.66   59.49
  -2  -3   1 1417.56   61.49
  -2   3  -1 1426.66   63.99
  -2   3  -1 1385.66   61.89
   2   3  -1 1362.66   63.89
   2   3  -1 1475.25   63.79
   2  -3   1 1495.45   64.99
   2  -3   1 1496.95   64.49
   2  -3   1 1580.14   67.49
   2  -3   1 1532.75   66.69
   2   3  -1 1457.75   60.49
   2  -3   1 1533.45   62.29
   2   3  -1 1461.15   63.29
   2   3  -1 1464.15   59.39
   2  -3   1 1567.24   65.29
   2   3  -1 1470.35   61.59
  -2   3   0 2259.07   91.39
  -2  -3   0 2254.37   89.09
  -2   3   0 2270.37   91.39
  -2   3   0 2241.48   90.59
  -2   3   0 2241.58   93.59
   2  -3   0 2224.28   91.09
   2  -3   0 2285.57   93.59
   2  -3   0 2286.07   90.99
   2  -3   0 2323.77   91.59
  -2   3   1 1523.95   68.29
  -2  -3  -1 1498.05   64.89
  -2   3   1 1545.15   65.29
  -2  -3  -1 1440.76   62.59
  -2  -3  -1 1465.65   65.49
  -2  -3  -1 1473.05   62.99
  -2   3   1 1508.55   66.89
  -2  -3  -1 1550.74   65.89
  -2   3   1 1520.15   65.09
  -2  -3  -1 1471.05   62.59
   2  -3  -1 1405.16   64.49
   2   3   1 1401.96   60.99
   2  -3  -1 1421.76   64.49
   2   3   1 1451.35   65.19
   2   3   1 1436.46   65.09
   2  -3  -1 1377.06   67.19
   2  -3  -1 1364.06   63.19
   2  -3  -1 1371.36   66.69
   2   3   1 1430.36   61.69
   2  -3  -1 1427.46   60.89
  -2   3   2  851.61   52.09
  -2  -3  -2  855.41   52.09
  -2  -3  -2  870.01   51.39
  -2   3   2  899.51   51.69
  -2  -3  -2  863.51   50.29
  -2  -3  -2  925.21   54.99
  -2  -3  -2  814.92   49.10
  -2   3   2  934.31   55.59
  -2   3   2  885.91   50.69
  -2   3   2  930.11   51.99
  -2  -3  -2  885.21   51.19
   2   3   2 1072.89   52.99
   2  -3  -2 1096.99   53.99
   2   3   2 1025.20   54.29
   2  -3  -2 1084.69   58.79
   2  -3  -2 1105.89   53.89
   2   3   2 1099.79   53.49
   2  -3  -2 1027.30   53.39
   2   3   2 1028.10   54.19
   2  -3  -2 1074.49   56.49
  -2  -3  -3  432.76   36.40
  -2   3   3  393.96   38.60
  -2   3   3  407.26   35.90
  -2  -3  -3  360.86   34.60
  -2  -3  -3  377.36   34.50
  -2  -3  -3  301.67   35.90
  -2   3   3  401.76   35.70
  -2  -3  -3  376.96   33.70
  -2   3   3  346.17   33.80
  -2  -3  -3  421.96   60.29
  -2   3   3  410.56   34.70
   2   3   3  464.25   41.80
   2  -3  -3  453.05   36.70
   2  -3  -3  537.85   41.60
   2   3   3  450.95   36.10
   2  -3  -3  435.66   36.00
   2  -3  -3  528.95   38.80
   2  -3  -3  441.76   40.90
   2   3   3  436.66   36.60
   2   3   3  450.65   36.90
  -2  -3  -4  129.39   26.10
  -2   3   4  102.49   25.00
  -2  -3  -4  173.18   36.10
  -2   3   4  172.98   31.70
  -2  -3  -4  107.89   25.20
  -2  -3  -4  147.39   29.90
  -2  -3  -4  147.39   31.40
  -2   3   4  150.98   30.00
   2  -3  -4  158.38   29.70
   2   3   4  129.79   28.00
   2  -3  -4  125.59   29.10
   2  -3  -4   75.99   28.50
   2  -3  -4  156.38   28.60
   2   3   4  141.69   29.70
   2  -3  -4  126.79   25.20
  -2  -3  -5   40.00   20.40
  -2  -3  -5   32.90   24.90
  -2  -3  -5   19.40   19.10
  -2   3   5    7.70   16.00
  -2   3   5    1.50   21.20
   2  -3  -5   74.69   27.20
   2   3   5   21.80   23.50
   2   3   5   57.49   25.50
   2  -3  -5   18.90   18.40
  -2  -3  -6  139.79   41.20
  -2  -3  -6  131.79   39.30
  -2  -3  -6  129.69   39.70
   2  -3  -6  133.69   40.60
   2  -3  -6   81.29   38.50
   2   3   6   88.09   30.20
   2  -3  -6  107.29   35.40
  -3   3  -6  -28.20   21.20
  -3   3  -6   10.40   25.70
  -3   3  -6    2.60   23.20
   3   3  -6  -33.30   25.30
   3   3  -6  -15.30   23.60
   3   3  -6   -1.90   29.40
  -3   3  -5  118.59   31.40
  -3   3  -5   95.59   31.10
  -3   3  -5   89.89   33.00
  -3  -3   5   97.29   30.60
  -3  -3   5   70.49   27.50
   3   3  -5   70.89   21.70
   3  -3   5   90.49   31.70
   3   3  -5  104.49   33.10
   3  -3   5   53.79   25.20
   3   3  -5  103.19   27.80
   3   3  -5   68.79   28.00
  -3   3  -4  281.47   33.40
  -3   3  -4  205.38   34.30
  -3  -3   4  261.07   38.70
  -3  -3   4  243.88   34.00
  -3   3  -4  295.37   39.00
  -3  -3   4  201.18   34.50
  -3   3  -4  294.97   46.60
   3   3  -4  245.98   26.00
   3   3  -4  202.28   33.60
   3  -3   4  305.07   45.20
   3  -3   4  220.18   38.20
   3  -3   4  267.87   39.90
   3   3  -4  309.27   43.80
   3   3  -4  217.38   32.80
  -3   3  -3    7.50   11.90
  -3   3  -3   17.80   11.70
  -3   3  -3   36.30   14.00
  -3  -3   3   18.90   12.90
  -3  -3   3   20.80   11.00
  -3  -3   3    8.30   12.70
  -3   3  -3   11.80   10.70
  -3   3  -3   28.10   14.20
  -3   3  -3   26.90   14.50
   3  -3   3   20.80   11.30
   3  -3   3   44.00   15.30
   3  -3   3   27.80   14.30
   3  -3   3   31.10   15.10
   3   3  -3   27.20   15.50
   3   3  -3   16.80   10.80
   3   3  -3   29.20   12.90
   3  -3   3   33.30   13.80
   3   3  -3   37.40   10.30
   3   3  -3   38.80   13.90
   3   3  -3   22.80   12.20
   3  -3   3   10.60   12.00
  -3   3  -2  153.08   17.60
  -3   3  -2  183.78   19.30
  -3   3  -2  136.19   21.70
  -3   3  -2  155.18   22.80
  -3  -3   2  109.19   12.70
  -3  -3   2  125.89   18.60
  -3   3  -2  153.38   17.90
  -3  -3   2  142.69   20.50
  -3  -3   2  127.59   19.20
  -3   3  -2  164.28   23.00
   3  -3   2  166.98   23.60
   3   3  -2  164.88   18.40
   3  -3   2  136.99   20.80
   3  -3   2  161.08   18.80
   3   3  -2  155.28   22.00
   3   3  -2  137.49   12.90
   3   3  -2  145.89   20.40
   3   3  -2  155.58   20.70
   3  -3   2  136.79   16.10
   3  -3   2  162.78   19.40
   3   3  -2  147.59   15.50
   3  -3   2  163.58   23.90
   3   3  -2  151.08   16.60
  -3   3  -1 5553.64  215.78
  -3  -3   1 5600.84  214.88
  -3  -3   1 5614.14  210.18
  -3   3  -1 5591.44  216.58
  -3   3  -1 5697.33  220.98
  -3  -3   1 5429.46  212.28
  -3   3  -1 5447.46  218.68
  -3   3  -1 5519.05  217.48
  -3  -3   1 5627.04  216.08
  -3  -3   1 5494.95  216.08
   3   3  -1 5506.35  212.08
   3   3  -1 5468.05  209.58
   3  -3   1 5711.13  218.48
   3  -3   1 5712.53  216.38
   3  -3   1 5540.85  220.88
   3  -3   1 5473.75  219.68
   3  -3   1 5946.51  224.58
   3   3  -1 5703.33  215.78
   3   3  -1 5639.94  212.38
   3   3  -1 5536.05  214.58
  -3   3   0  208.58   15.20
  -3   3   0  183.88   15.20
  -3  -3   0  185.18   14.60
  -3  -3   0  202.78    8.90
  -3  -3   0  198.38    9.00
  -3   3   0  189.98   15.70
  -3   3   0  177.18   17.10
   3  -3   0  218.08   13.00
   3  -3   0  194.28   15.70
   3  -3   0  189.88   15.10
   3  -3   0  213.18   15.60
   3  -3   0  225.88   18.50
  -3  -3  -1 5406.76  214.28
  -3  -3  -1 5422.46  212.48
  -3  -3  -1 5559.34  212.38
  -3   3   1 5614.34  220.08
  -3   3   1 5585.24  215.78
  -3  -3  -1 5428.56  212.98
  -3  -3  -1 5483.15  212.48
  -3  -3  -1 5381.26  211.78
  -3  -3  -1 5441.36  215.08
  -3   3   1 5533.35  209.88
  -3  -3  -1 5491.75  216.88
  -3   3   1 5522.85  215.78
   3  -3  -1 5623.84  219.58
   3  -3  -1 5520.55  213.18
   3   3   1 5860.11  222.28
   3  -3  -1 5547.75  215.38
   3  -3  -1 5567.44  219.28
   3  -3  -1 5568.84  215.78
   3   3   1 5381.86  209.58
   3  -3  -1 5649.33  210.08
   3   3   1 5515.35  209.98
  -3  -3  -2  164.88   18.80
  -3   3   2  170.28   19.70
  -3   3   2  178.88   24.60
  -3   3   2  133.49   22.50
  -3  -3  -2  134.59   22.20
  -3  -3  -2  171.78   22.80
  -3  -3  -2  151.48   17.10
  -3  -3  -2  141.39   16.90
  -3  -3  -2  183.78   25.30
  -3  -3  -2  169.58   18.80
  -3   3   2  155.48   17.60
  -3   3   2  121.99   19.20
   3  -3  -2  144.79   17.70
   3   3   2  122.19   18.50
   3  -3  -2  138.09   23.30
   3   3   2  161.38   17.40
   3  -3  -2  138.79   20.70
   3   3   2  126.09   20.80
   3  -3  -2  132.19   19.90
   3   3   2  142.39   22.00
   3  -3  -2  155.68   24.70
  -3   3   3   25.00   15.10
  -3  -3  -3   25.80   12.40
  -3  -3  -3   19.00   13.30
  -3   3   3   28.60   13.50
  -3  -3  -3   50.89   16.80
  -3  -3  -3   26.90   12.40
  -3  -3  -3   54.09   19.00
  -3   3   3    9.20   10.80
  -3  -3  -3   29.30   13.30
  -3   3   3   24.10   13.90
   3  -3  -3    7.20   13.40
   3   3   3   18.10   11.80
   3   3   3   36.10   15.40
   3  -3  -3   -0.30   13.90
   3  -3  -3    9.20   11.80
   3   3   3   16.30   12.90
   3  -3  -3    6.00   10.00
   3  -3  -3   36.30   14.40
   3   3   3   30.10   14.40
  -3   3   4  253.17   39.00
  -3   3   4  289.67   40.90
  -3  -3  -4  220.28   34.50
  -3   3   4  220.38   35.10
  -3  -3  -4  266.77   38.80
  -3  -3  -4  246.18   36.50
  -3   3   4  239.28   41.20
  -3  -3  -4  225.28   41.70
  -3  -3  -4  288.77   43.80
   3  -3  -4  263.27   28.50
   3   3   4  288.97   40.90
   3  -3  -4  254.57   42.90
   3  -3  -4  241.28   37.20
   3  -3  -4  240.68   41.00
   3   3   4  247.88   39.50
  -3  -3  -5   67.79   30.10
  -3  -3  -5   85.89   28.10
  -3   3   5   94.59   28.70
  -3   3   5   98.69   32.10
  -3  -3  -5   93.09   26.50
  -3  -3  -5   61.99   28.30
   3   3   5   85.89   27.70
   3  -3  -5   77.89   30.30
   3  -3  -5   42.20   27.80
   3  -3  -5   34.00   25.10
   3  -3  -5  111.69   30.30
   3   3   5   91.79   29.80
  -3  -3  -6   44.20   33.70
  -3  -3  -6   25.50   23.40
  -3   3   6   10.50   24.80
  -3  -3  -6   26.00   22.70
   3  -3  -6   15.20   28.40
   3  -3  -6   -5.20   26.70
   3   3   6  -39.10   20.60
   3   3   6   16.60   27.30
   3  -3  -6   41.60   29.00
  -4   3  -6  122.59   38.70
  -4  -3   6  108.59   40.20
  -4   3  -6  110.39   37.40
  -4   3  -6   93.99   32.00
   4   3  -6   78.79   38.60
   4  -3   6   91.09   34.60
   4   3  -6   66.79   39.30
   4   3  -6    5.80   29.30
   4  -3   6   61.89   37.30
  -4   3  -5   55.69   24.30
  -4  -3   5   58.59   26.30
  -4  -3   5   31.60   21.00
  -4   3  -5  101.19   34.50
  -4   3  -5   41.00   21.80
   4   3  -5   47.70   23.80
   4  -3   5   29.10   22.90
   4   3  -5   20.20   25.60
   4  -3   5  -14.20   19.80
   4   3  -5   90.89   32.50
  -4  -3   4   95.19   26.70
  -4   3  -4  135.49   28.10
  -4  -3   4  112.59   27.30
  -4   3  -4  140.39   29.70
  -4   3  -4  129.59   28.10
  -4   3  -4  119.49   33.70
  -4  -3   4  150.38   30.50
   4   3  -4  102.19   28.50
   4  -3   4   94.09   27.30
   4   3  -4  102.29   24.00
   4  -3   4  110.69   29.90
   4   3  -4  103.59   18.10
   4   3  -4  146.19   30.00
  -4   3  -3  534.05   42.80
  -4   3  -3  540.35   42.50
  -4  -3   3  508.75   40.70
  -4   3  -3  481.35   39.20
  -4  -3   3  464.75   38.80
  -4   3  -3  537.85   43.80
  -4  -3   3  519.25   38.70
  -4   3  -3  577.74   42.00
   4   3  -3  490.45   33.20
   4  -3   3  556.14   41.80
   4   3  -3  500.45   39.30
   4  -3   3  483.55   40.10
   4   3  -3  569.24   44.90
   4  -3   3  464.35   39.00
   4   3  -3  514.35   47.80
   4   3  -3  506.45   39.40
   4   3  -3  424.36   34.70
   4   3  -3  537.35   39.00
   4  -3   3  556.14   44.20
   4  -3   3  515.95   38.50
  -4  -3   2 2351.56  105.89
  -4  -3   2 2291.67  108.39
  -4  -3   2 2295.37  106.89
  -4  -3   2 2341.67   96.79
  -4   3  -2 2285.47  106.79
  -4  -3   2 2347.17  107.29
  -4   3  -2 2257.67  107.09
  -4   3  -2 2203.48  110.19
  -4  -3   2 2263.17  103.89
  -4   3  -2 2291.17  110.49
  -4   3  -2 2261.47  110.29
   4   3  -2 2551.44   96.29
   4  -3   2 2577.14  110.39
   4  -3   2 2645.64  114.49
   4  -3   2 2633.04  108.69
   4   3  -2 2554.04  110.29
   4  -3   2 2481.75  109.29
   4  -3   2 2598.84  114.29
   4   3  -2 2548.65  107.59
   4  -3   2 2610.44  109.69
   4   3  -2 2613.64  105.09
  -4   3  -1  117.39   16.70
  -4   3  -1  105.29   16.50
  -4   3  -1  137.29   17.90
  -4  -3   1  106.49   13.50
  -4   3  -1  135.39   18.40
  -4   3  -1  107.69   11.50
  -4  -3   1  109.69    9.10
  -4   3  -1  123.99   16.20
  -4  -3   1  100.59   10.90
   4  -3   1   67.79   11.60
   4  -3   1   84.89   15.70
   4   3  -1   69.59    8.40
   4   3  -1   71.49   11.00
   4  -3   1   60.19   12.30
   4  -3   1   69.19   13.40
   4  -3   1   85.99   15.90
  -4  -3   0    2.90    2.40
  -4   3   0   -2.00    5.00
  -4  -3   0    4.20    3.00
  -4   3   0    1.70    5.80
  -4   3   0    1.40    6.60
  -4   3   0   -1.60    4.80
   4  -3   0    3.60    7.40
   4  -3   0    6.10    3.90
   4  -3   0    0.50    6.30
   4   3   0   -1.40    2.30
   4  -3   0    8.20    6.40
   4   3   0    3.80    2.00
   4  -3   0   -4.50    4.60
  -4  -3  -1   62.69   13.80
  -4   3   1   59.99   12.60
  -4   3   1   73.89   13.10
  -4   3   1   74.19   14.90
  -4  -3  -1   72.39   10.80
  -4  -3  -1   64.59   11.60
  -4  -3  -1   84.69   12.20
  -4   3   1   75.69    8.70
  -4  -3  -1   71.09   11.60
  -4  -3  -1   60.09   10.70
  -4   3   1   48.90   13.30
   4  -3  -1  115.49   15.70
   4  -3  -1  111.69   18.20
   4   3   1  103.99   15.90
   4  -3  -1  101.09   11.30
   4  -3  -1  120.29   18.40
   4   3   1   91.29    9.20
   4   3   1   86.59    8.70
  -4   3   2 2638.14  111.89
  -4   3   2 2622.84  110.09
  -4  -3  -2 2524.75  110.19
  -4   3   2 2549.24  114.69
  -4  -3  -2 2491.35  113.39
  -4   3   2 2501.75  116.29
  -4   3   2 2643.64  112.29
  -4  -3  -2 2571.34  111.09
  -4  -3  -2 2557.84  108.69
  -4  -3  -2 2652.73  111.99
  -4  -3  -2 2660.33  115.69
  -4  -3  -2 2534.65  109.39
   4  -3  -2 2325.37  114.89
   4  -3  -2 2368.56  107.99
   4   3   2 2301.77  105.89
   4  -3  -2 2432.86  109.79
   4   3   2 2420.46  111.89
   4   3   2 2352.86  106.99
   4  -3  -2 2244.88  108.89
   4  -3  -2 2340.47  114.89
   4   3   2 2325.37  109.59
   4  -3  -2 2337.97   99.99
  -4  -3  -3  548.35   41.50
  -4   3   3  532.85   41.10
  -4  -3  -3  503.15   44.20
  -4  -3  -3  536.85   43.20
  -4   3   3  484.65   41.10
  -4  -3  -3  493.45   38.40
  -4   3   3  529.45   44.80
  -4  -3  -3  497.05   40.90
  -4   3   3  549.65   41.10
  -4  -3  -3  461.25   40.90
   4  -3  -3  458.45   42.60
   4   3   3  505.15   41.70
   4   3   3  509.85   39.00
   4  -3  -3  481.55   38.90
   4   3   3  551.54   41.20
   4   3   3  481.35   40.60
   4  -3  -3  597.54   43.00
  -4  -3  -4  100.09   25.40
  -4  -3  -4  109.39   27.00
  -4   3   4   80.49   26.40
  -4  -3  -4  140.99   28.00
  -4  -3  -4  122.09   29.20
  -4   3   4  151.08   29.80
  -4   3   4  112.09   28.80
  -4   3   4  128.79   28.80
  -4  -3  -4  151.78   34.70
   4   3   4  142.99   28.90
   4  -3  -4  109.29   20.90
   4  -3  -4  105.39   31.80
   4   3   4  135.89   28.10
   4  -3  -4   74.49   27.60
   4  -3  -4  123.29   27.50
  -4  -3  -5   38.50   23.80
  -4   3   5   31.80   23.60
  -4  -3  -5   50.39   26.60
  -4   3   5   29.80   20.80
  -4  -3  -5   21.00   23.90
   4  -3  -5   53.59   28.20
   4  -3  -5   24.70   33.10
   4   3   5   42.60   25.90
   4   3   5   28.60   21.10
   4  -3  -5   63.29   32.50
  -4  -3  -6   90.29   33.70
  -4  -3  -6   92.09   47.10
  -4   3   6  104.79   34.10
   4   3   6  111.39   35.40
   4   3   6  138.29   36.00
   4  -3  -6  121.19   37.80
   4  -3  -6   39.10   37.30
  -5   3  -6    6.30   30.30
  -5  -3   6   30.80   28.10
  -5  -3   6   14.30   23.80
  -5   3  -6   24.40   28.90
   5   3  -6  -33.80   29.10
   5   3  -6  -45.60   26.10
   5  -3   6   32.40   25.90
   5  -3   6   30.00   29.10
  -5  -3   5  177.48   36.80
  -5  -3   5  178.98   37.30
  -5   3  -5  150.68   36.00
  -5   3  -5  218.78   42.30
  -5   3  -5  282.37   51.09
   5  -3   5  226.98   45.30
   5  -3   5  201.28   41.20
   5   3  -5  127.89   23.80
   5   3  -5  227.78   43.90
   5   3  -5  255.07   40.20
  -5  -3   4   84.29   25.20
  -5  -3   4   85.39   24.20
  -5   3  -4  111.69   27.10
  -5   3  -4  127.09   29.30
  -5   3  -4  133.29   30.40
  -5   3  -4  107.49   32.40
   5  -3   4  153.98   30.70
   5   3  -4  174.58   35.60
   5   3  -4  120.29   28.90
   5   3  -4  131.39   25.70
   5  -3   4  117.39   30.00
   5   3  -4  178.28   19.70
  -5   3  -3  272.97   32.10
  -5  -3   3  318.17   31.00
  -5   3  -3  318.47   34.30
  -5  -3   3  276.27   30.20
  -5   3  -3  309.67   33.50
  -5   3  -3  322.97   31.40
  -5   3  -3  233.68   33.40
  -5  -3   3  286.37   29.80
   5   3  -3  340.77   29.20
   5  -3   3  307.27   34.30
   5   3  -3  400.36   37.30
   5   3  -3  400.66   33.30
   5   3  -3  358.16   22.10
   5  -3   3  363.26   36.30
   5  -3   3  388.26   33.80
   5   3  -3  350.16   32.20
   5   3  -3  388.96   34.70
   5  -3   3  417.96   36.10
   5  -3   3  361.66   34.10
   5   3  -3  333.17   31.90
  -5  -3   2 1242.88   64.19
  -5  -3   2 1210.08   65.39
  -5   3  -2 1219.48   75.19
  -5  -3   2 1241.28   66.29
  -5   3  -2 1294.17   70.29
  -5   3  -2 1280.47   64.69
  -5   3  -2 1299.77   69.79
  -5  -3   2 1211.78   63.09
  -5   3  -2 1252.67   66.99
  -5   3  -2 1269.97   67.09
  -5  -3   2 1260.47   62.09
   5   3  -2 1314.17   51.19
   5  -3   2 1309.37   66.39
   5  -3   2 1354.96   68.29
   5  -3   2 1363.66   71.39
   5   3  -2 1205.58   65.29
   5  -3   2 1323.97   65.89
   5  -3   2 1278.37   66.79
   5   3  -2 1327.47   64.09
  -5  -3   1  390.06   21.30
  -5   3  -1  378.16   29.00
  -5   3  -1  402.76   28.10
  -5   3  -1  406.76   28.00
  -5  -3   1  378.86   23.00
  -5  -3   1  419.86   21.70
  -5  -3   1  402.46   23.40
  -5   3  -1  375.16   22.80
  -5   3  -1  368.36   26.00
  -5   3  -1  380.66   27.20
   5  -3   1  320.27   26.30
   5  -3   1  326.87   27.60
   5  -3   1  312.87   25.10
   5   3  -1  339.77   21.90
   5   3  -1  308.27   23.00
   5  -3   1  290.77   21.70
   5  -3   1  353.36   25.80
   5   3  -1  300.47   19.30
  -5  -3   0 1176.78   49.40
  -5   3   0 1225.68   61.09
  -5   3   0 1213.08   55.89
  -5  -3   0 1200.28   47.60
  -5   3   0 1184.28   57.39
  -5   3   0 1187.68   57.79
  -5  -3   0 1194.48   50.59
   5  -3   0 1272.17   57.99
   5  -3   0 1212.88   59.89
   5   3   0 1205.18   49.99
   5  -3   0 1239.48   56.79
   5  -3   0 1206.48   60.79
   5  -3   0 1231.88   49.80
   5   3   0 1243.08   48.80
  -5  -3  -1  295.27   22.30
  -5  -3  -1  334.17   22.80
  -5   3   1  329.17   25.50
  -5   3   1  323.47   20.00
  -5  -3  -1  310.27   26.70
  -5   3   1  351.96   29.50
  -5   3   1  317.87   25.90
  -5  -3  -1  332.97   23.40
  -5   3   1  382.06   29.50
   5   3   1  371.96   26.80
   5  -3  -1  409.86   26.90
   5  -3  -1  423.36   30.50
   5   3   1  374.36   18.90
   5   3   1  418.86   20.00
   5  -3  -1  375.16   26.10
   5   3   1  406.56   28.60
   5   3   1  382.16   22.80
   5  -3  -1  396.76   22.70
   5  -3  -1  405.66   21.50
  -5   3   2 1319.77   65.09
  -5  -3  -2 1396.46   65.89
  -5   3   2 1281.67   71.29
  -5  -3  -2 1343.17   71.69
  -5  -3  -2 1284.67   76.19
  -5  -3  -2 1279.87   67.09
  -5  -3  -2 1312.27   84.69
  -5  -3  -2 1242.38   65.29
  -5  -3  -2 1223.68   66.39
  -5   3   2 1324.97   67.79
  -5   3   2 1256.77   71.49
  -5   3   2 1260.57   67.39
   5   3   2 1253.27   66.29
   5  -3  -2 1267.27   66.59
   5  -3  -2 1318.77   64.69
   5   3   2 1273.87   63.29
   5  -3  -2 1298.47   55.99
   5  -3  -2 1352.46   72.39
   5  -3  -2 1315.37   66.79
   5   3   2 1292.07   69.19
   5   3   2 1212.68   61.39
  -5  -3  -3  387.66   38.30
  -5  -3  -3  375.06   34.50
  -5  -3  -3  353.46   32.10
  -5  -3  -3  373.76   35.30
  -5  -3  -3  377.96   35.70
  -5  -3  -3  424.76   38.40
  -5   3   3  350.26   36.80
  -5  -3  -3  392.66   33.20
  -5   3   3  356.96   34.70
  -5   3   3  363.06   33.10
  -5   3   3  325.17   33.70
  -5   3   3  385.26   33.40
   5   3   3  324.07   33.60
   5   3   3  342.47   33.60
   5  -3  -3  270.17   29.30
   5   3   3  263.97   28.10
   5  -3  -3  279.77   30.70
   5  -3  -3  300.97   23.00
   5   3   3  295.97   30.40
   5  -3  -3  285.77   41.70
  -5   3   4   98.99   26.10
  -5  -3  -4  146.39   29.40
  -5  -3  -4  107.99   27.40
  -5   3   4  109.49   26.00
  -5  -3  -4  108.19   29.70
  -5   3   4  151.08   33.50
  -5   3   4   85.19   28.00
  -5  -3  -4  117.49   26.30
   5  -3  -4  112.89   26.90
   5  -3  -4  147.89   29.10
   5  -3  -4  118.09   29.30
   5   3   4  121.09   29.40
   5   3   4   87.19   23.60
   5  -3  -4  128.89   20.90
  -5  -3  -5  284.37   44.30
  -5  -3  -5  278.47   50.79
  -5   3   5  203.18   39.50
  -5  -3  -5  132.09   32.70
  -5   3   5  181.28   36.80
  -5  -3  -5  232.48   44.00
   5  -3  -5  193.98   44.30
   5   3   5  265.27   45.00
   5  -3  -5  235.18   46.30
   5   3   5  224.98   40.70
   5  -3  -5  175.58   35.80
  -5  -3  -6   -9.70   25.90
  -5   3   6   22.10   24.10
  -5  -3  -6    1.10   20.40
  -5  -3  -6   67.99   28.60
   5  -3  -6   -7.20   28.90
   5  -3  -6   15.30   21.30
   5   3   6   61.89   29.70
   5   3   6   25.30   23.60
   5  -3  -6   46.00   33.50
  -6  -3   5   28.40   23.30
  -6   3  -5   28.30   25.80
  -6  -3   5   16.50   18.70
  -6   3  -5   56.99   27.80
   6  -3   5   11.70   21.80
   6   3  -5   23.50   14.60
   6   3  -5   12.70   18.80
   6   3  -5   12.90   26.20
   6  -3   5   53.89   26.80
  -6   3  -4   44.90   23.00
  -6  -3   4   25.30   17.50
  -6   3  -4   30.30   22.20
  -6   3  -4   44.60   20.40
  -6  -3   4   24.80   17.40
  -6   3  -4   12.80   18.90
   6   3  -4   97.29   22.80
   6   3  -4   42.50   25.20
   6  -3   4   26.30   17.40
   6  -3   4   -1.70   15.50
   6  -3   4   48.50   21.90
  -6  -3   3  272.27   29.60
  -6   3  -3  233.48   28.00
  -6  -3   3  209.08   25.00
  -6   3  -3  283.17   38.90
  -6  -3   3  257.57   38.60
  -6  -3   3  226.68   31.70
  -6   3  -3  288.07   38.90
  -6   3  -3  269.97   30.50
  -6  -3   3  250.77   34.20
  -6   3  -3  220.08   34.90
   6  -3   3  323.17   34.30
   6  -3   3  217.58   26.50
   6   3  -3  242.78   26.70
   6  -3   3  209.28   30.10
   6   3  -3  286.57   37.90
   6   3  -3  259.07   26.40
   6  -3   3  295.07   31.80
   6  -3   3  240.48   28.50
   6   3  -3  248.78   15.00
  -6  -3   2  570.74   37.80
  -6  -3   2  575.64   40.50
  -6  -3   2  545.55   36.60
  -6  -3   2  583.64   35.40
  -6  -3   2  595.94   37.00
  -6   3  -2  559.24   37.00
  -6   3  -2  535.05   41.50
  -6   3  -2  537.25   40.60
  -6   3  -2  527.45   38.30
  -6   3  -2  513.35   40.70
   6  -3   2  527.05   38.20
   6  -3   2  579.74   43.00
   6   3  -2  561.94   38.50
   6   3  -2  589.34   34.70
   6  -3   2  515.75   39.00
   6   3  -2  573.04   36.00
   6  -3   2  559.34   43.20
   6  -3   2  574.94   37.50
  -6  -3   1 1220.88   55.59
  -6  -3   1 1180.18   48.30
  -6   3  -1 1121.99   53.29
  -6   3  -1 1252.87   62.69
  -6   3  -1 1239.08   62.49
  -6   3  -1 1178.28   61.69
  -6   3  -1 1291.07   65.79
  -6  -3   1 1178.38   52.99
  -6  -3   1 1143.99   52.89
  -6   3  -1 1182.48   60.09
  -6  -3   1 1187.18   53.89
   6  -3   1 1126.19   59.49
   6   3  -1 1215.18   53.59
   6   3  -1 1035.90   58.19
   6  -3   1 1216.48   63.89
   6  -3   1 1226.28   54.79
   6   3  -1 1223.78   51.89
   6  -3   1 1203.18   62.99
   6  -3   1 1187.48   58.69
  -6  -3   0  372.36   21.90
  -6   3   0  366.06   29.50
  -6   3   0  375.86   27.10
  -6   3   0  371.76   25.30
  -6  -3   0  394.36   20.00
  -6  -3   0  389.56   21.00
  -6  -3   0  388.16   20.90
  -6   3   0  438.86   29.20
   6   3   0  398.76   20.00
   6  -3   0  411.86   26.50
   6  -3   0  425.06   28.10
   6  -3   0  419.86   26.60
   6  -3   0  379.96   29.70
   6  -3   0  398.56   19.30
  -6   3   1 1152.08   64.99
  -6  -3  -1 1238.68   55.49
  -6  -3  -1 1198.88   63.39
  -6  -3  -1 1221.38   57.49
  -6   3   1 1281.87   65.19
  -6   3   1 1222.98   60.29
  -6  -3  -1 1267.37   56.49
  -6  -3  -1 1188.08   55.59
  -6   3   1 1178.18   60.09
  -6   3   1 1146.89   51.89
   6   3   1 1208.38   49.00
   6   3   1 1163.18   59.69
   6  -3  -1 1199.18   53.19
   6  -3  -1 1212.98   59.89
   6  -3  -1 1207.18   59.09
   6  -3  -1 1166.68   63.29
   6   3   1 1172.98   48.50
   6  -3  -1 1188.88   52.59
   6   3   1 1134.59   54.49
  -6   3   2  602.04   45.10
  -6  -3  -2  567.64   42.60
  -6  -3  -2  518.45   36.60
  -6  -3  -2  517.75   40.80
  -6  -3  -2  559.14   38.60
  -6   3   2  584.44   36.30
  -6  -3  -2  583.24   36.90
  -6   3   2  569.34   43.40
  -6   3   2  579.04   44.00
  -6  -3  -2  542.25   38.20
  -6   3   2  529.95   38.40
  -6  -3  -2  566.44   41.60
   6  -3  -2  512.45   41.50
   6   3   2  604.54   36.10
   6   3   2  587.44   38.50
   6  -3  -2  631.14   40.00
   6  -3  -2  578.44   28.20
   6  -3  -2  576.74   35.90
   6   3   2  520.25   33.30
   6  -3  -2  580.64   39.20
   6   3   2  496.65   39.40
  -6  -3  -3  237.18   32.30
  -6  -3  -3  210.08   32.60
  -6  -3  -3  271.37   38.70
  -6  -3  -3  286.37   29.70
  -6  -3  -3  245.98   29.40
  -6  -3  -3  254.37   36.70
  -6  -3  -3  246.98   27.90
  -6   3   3  238.68   36.70
  -6   3   3  236.38   34.10
  -6   3   3  290.77   29.90
  -6   3   3  265.57   30.90
  -6   3   3  287.47   29.60
   6  -3  -3  230.08   26.20
   6  -3  -3  221.88   34.60
   6  -3  -3  216.08   19.10
   6   3   3  276.47   41.10
   6   3   3  222.38   30.00
   6  -3  -3  255.97   19.40
   6   3   3  218.78   24.80
   6  -3  -3  241.48   28.60
  -6  -3  -4   71.19   24.60
  -6   3   4   22.60   22.50
  -6  -3  -4   21.30   18.10
  -6   3   4   61.69   22.00
  -6  -3  -4   68.19   18.90
  -6  -3  -4   45.90   18.50
  -6   3   4   52.69   21.30
  -6   3   4   56.19   21.20
  -6  -3  -4   65.89   24.70
   6   3   4   53.39   23.00
   6  -3  -4   50.09   25.80
   6  -3  -4   22.70   21.20
   6  -3  -4   53.39   20.50
   6   3   4   47.10   18.40
   6  -3  -4   57.79   14.10
  -6   3   5   16.10   21.90
  -6   3   5   11.00   21.70
  -6  -3  -5   21.30   20.90
  -6  -3  -5   39.90   26.40
  -6  -3  -5   35.90   21.10
  -6   3   5   21.10   22.20
  -6  -3  -5   25.70   24.10
   6   3   5   55.69   26.00
   6  -3  -5   15.60   18.00
   6  -3  -5   22.60   22.00
   6   3   5   36.10   21.80
   6  -3  -5   17.50   20.00
   6  -3  -5   26.70   26.20
  -7  -3   5   79.99   28.40
  -7   3  -5   95.09   29.40
  -7   3  -5   53.19   29.30
  -7  -3   5   65.79   27.90
  -7   3  -5   80.29   29.80
   7   3  -5  108.49   29.10
   7  -3   5   58.19   28.50
   7  -3   5   39.70   25.80
   7   3  -5   38.00   30.10
  -7   3  -4  235.58   47.00
  -7   3  -4  195.88   34.00
  -7  -3   4  155.68   31.00
  -7   3  -4  254.47   40.60
  -7  -3   4  223.58   37.20
   7   3  -4  266.67   31.60
   7  -3   4  287.07   45.10
   7   3  -4  266.27   48.00
   7  -3   4  186.68   35.60
   7  -3   4  241.38   40.30
   7  -3   4  231.68   39.00
   7   3  -4  254.47   14.60
  -7  -3   3  103.59   20.60
  -7  -3   3  100.79   22.80
  -7   3  -3  122.09   26.40
  -7  -3   3   84.79   21.80
  -7   3  -3  115.39   23.00
  -7  -3   3  119.19   22.90
  -7   3  -3  108.99   23.20
  -7   3  -3  119.19   26.90
  -7  -3   3   96.89   22.30
   7   3  -3  130.09   25.00
   7  -3   3  141.39   26.50
   7  -3   3   80.19   20.00
   7   3  -3  103.89   21.10
   7  -3   3  100.49   21.30
   7  -3   3   90.59   21.60
   7  -3   3   81.29   23.90
  -7   3  -2   39.00   15.00
  -7   3  -2   52.49   16.00
  -7  -3   2   43.60   13.10
  -7  -3   2   46.40   13.30
  -7  -3   2   61.69   17.30
  -7  -3   2   38.60   13.00
  -7   3  -2   60.69   14.00
  -7  -3   2   52.39   12.10
  -7   3  -2   52.99   14.70
  -7   3  -2   76.69   19.30
   7   3  -2   27.30    9.90
   7   3  -2   36.20   11.20
   7   3  -2   28.20   11.70
   7  -3   2   46.20   15.90
   7  -3   2   43.90   13.30
   7  -3   2   47.80   13.80
   7  -3   2   31.80   15.30
   7  -3   2   32.30   12.90
  -7   3  -1  370.26   31.70
  -7   3  -1  333.57   30.80
  -7  -3   1  388.06   23.90
  -7  -3   1  383.56   24.10
  -7   3  -1  362.96   23.00
  -7  -3   1  384.36   19.70
  -7   3  -1  360.96   28.70
  -7  -3   1  394.06   26.20
  -7  -3   1  369.16   23.40
  -7   3  -1  363.96   30.40
  -7   3  -1  381.56   31.70
  -7  -3   1  405.86   20.40
   7  -3   1  415.66   24.40
   7  -3   1  443.86   31.50
   7   3  -1  419.46   23.60
   7   3  -1  435.36   32.20
   7  -3   1  415.06   33.40
   7  -3   1  429.66   33.30
   7  -3   1  423.46   29.30
   7   3  -1  444.76   23.80
  -7   3   0 1628.04   78.89
  -7  -3   0 1704.13   68.99
  -7  -3   0 1701.03   70.49
  -7  -3   0 1719.13   73.09
  -7  -3   0 1698.23   71.09
  -7  -3   0 1773.12   77.69
  -7   3   0 1719.53   83.79
  -7   3   0 1687.03   76.89
  -7   3   0 1755.32   80.69
   7  -3   0 1660.73   82.89
   7  -3   0 1687.33   76.99
   7  -3   0 1720.83   77.99
   7  -3   0 1700.83   79.09
   7   3   0 1664.23   69.69
  -7  -3  -1  441.36   26.40
  -7  -3  -1  409.36   33.60
  -7  -3  -1  492.55   34.50
  -7   3   1  413.66   30.50
  -7   3   1  420.26   30.70
  -7  -3  -1  436.46   27.60
  -7   3   1  441.16   24.10
  -7  -3  -1  412.36   28.10
  -7   3   1  429.56   38.80
   7  -3  -1  392.26   23.00
   7   3   1  412.06   27.90
   7   3   1  401.76   25.70
   7  -3  -1  395.06   24.20
   7  -3  -1  394.06   32.60
   7  -3  -1  403.36   29.80
   7  -3  -1  383.06   28.20
  -7   3   2   52.19   17.30
  -7   3   2   34.90   13.50
  -7  -3  -2   24.60   12.80
  -7  -3  -2   55.59   14.80
  -7   3   2   32.50   12.70
  -7  -3  -2   64.29   15.20
  -7  -3  -2   35.20   12.00
  -7  -3  -2   39.30   15.70
  -7  -3  -2   30.00   12.50
   7  -3  -2   62.59    8.50
   7  -3  -2   34.70   12.60
   7  -3  -2   63.09   15.70
   7   3   2   52.39   14.80
   7  -3  -2   70.79   19.30
   7  -3  -2   45.20   11.80
   7   3   2   46.30   11.40
   7   3   2   47.40   12.10
   7   3   2   52.69   16.00
  -7  -3  -3  117.99   28.50
  -7  -3  -3  126.89   28.10
  -7  -3  -3  104.49   22.60
  -7   3   3   99.69   23.00
  -7  -3  -3  100.59   20.30
  -7  -3  -3  164.18   29.20
  -7   3   3  114.79   22.60
  -7   3   3  145.09   29.60
  -7  -3  -3  101.49   22.80
  -7  -3  -3  117.79   23.90
   7  -3  -3  122.49   24.80
   7   3   3  135.49   22.00
   7  -3  -3  148.29   12.90
   7  -3  -3  119.29   12.00
   7  -3  -3  126.99   23.40
   7   3   3  149.69   25.10
   7  -3  -3  127.09   24.80
  -7   3   4  212.08   35.00
  -7  -3  -4  300.27   42.50
  -7   3   4  178.98   31.90
  -7  -3  -4  272.47   39.10
  -7  -3  -4  263.87   38.50
  -7  -3  -4  256.47   43.40
  -7   3   4  260.87   45.50
  -7   3   4  226.68   39.90
   7   3   4  210.58   34.20
   7  -3  -4  204.98   19.60
   7   3   4  213.38   36.50
   7  -3  -4  204.08   34.50
   7  -3  -4  254.77   43.90
  -7   3   5   60.69   24.90
  -7   3   5   85.59   30.30
  -7  -3  -5   29.50   22.70
  -7  -3  -5   95.39   32.90
  -7  -3  -5  113.59   34.30
   7  -3  -5  106.19   37.90
   7   3   5  106.59   30.00
   7  -3  -5   92.49   20.20
   7   3   5  105.49   32.70
   7  -3  -5   43.50   28.10
   7  -3  -5   79.89   17.70
   7  -3  -5  156.28   34.30
  -8   3  -5   16.70   23.90
  -8  -3   5   10.50   22.70
  -8   3  -5   43.80   26.60
  -8  -3   5   43.80   21.40
  -8   3  -5   -3.50   20.70
   8   3  -5   15.50   21.30
   8   3  -5   28.90   26.90
   8  -3   5   15.90   23.50
   8  -3   5   41.40   23.80
  -8   3  -4   -5.30   17.80
  -8  -3   4   34.20   19.30
  -8   3  -4   41.30   22.20
  -8   3  -4   25.20   19.40
  -8  -3   4   27.10   18.90
   8   3  -4   37.50   22.80
   8  -3   4   42.20   22.10
   8  -3   4   24.50   20.00
   8  -3   4   39.00   21.70
   8  -3   4   89.29   26.40
  -8  -3   3  348.67   35.70
  -8   3  -3  351.56   32.30
  -8  -3   3  334.07   31.30
  -8   3  -3  336.97   34.80
  -8   3  -3  372.16   39.90
  -8  -3   3  330.97   55.49
  -8   3  -3  348.87   38.00
  -8  -3   3  302.37   40.70
  -8   3  -3  332.97   38.20
  -8  -3   3  355.36   33.90
   8   3  -3  259.27   31.10
   8  -3   3  280.27   31.80
   8  -3   3  300.97   36.60
   8  -3   3  330.17   38.90
   8  -3   3  303.97   33.80
   8   3  -3  293.47   31.40
  -8   3  -2  462.15   37.20
  -8  -3   2  459.65   33.30
  -8  -3   2  467.25   46.20
  -8  -3   2  497.65   40.70
  -8  -3   2  493.95   35.10
  -8  -3   2  492.85   36.30
  -8   3  -2  541.15   43.00
  -8   3  -2  451.95   33.30
  -8   3  -2  462.75   41.00
   8   3  -2  524.15   33.30
   8  -3   2  621.24   48.00
   8   3  -2  516.05   32.50
   8   3  -2  487.25   36.30
   8  -3   2  578.84   38.60
   8  -3   2  526.45   35.40
   8  -3   2  517.25   42.90
   8  -3   2  530.65   39.90
  -8   3  -1  208.38   23.30
  -8  -3   1  211.18   14.30
  -8  -3   1  218.48   14.10
  -8  -3   1  195.48   18.90
  -8  -3   1  214.78   16.50
  -8   3  -1  207.98   22.60
  -8   3  -1  198.78   23.30
  -8  -3   1  217.68   17.60
  -8   3  -1  196.58   15.90
  -8  -3   1  216.38   18.20
  -8   3  -1  208.38   24.90
   8  -3   1  258.07   24.90
   8  -3   1  250.07   22.40
   8   3  -1  269.67   18.10
   8  -3   1  258.77   26.70
   8   3  -1  288.57   22.00
   8  -3   1  263.17   27.20
  -8  -3   0   30.40    7.90
  -8  -3   0   37.30   11.10
  -8   3   0   54.59   13.40
  -8  -3   0   48.60   10.30
  -8   3   0   42.20   15.10
  -8  -3   0   39.00    6.40
  -8  -3   0   35.00    8.40
  -8   3   0   53.79   12.30
  -8   3   0   54.79   14.30
   8  -3   0   48.10   11.20
   8  -3   0   30.00   12.60
   8  -3   0   33.00   11.10
   8  -3   0   37.60   12.00
   8   3   0   38.50    7.70
  -8  -3  -1  269.17   21.80
  -8   3   1  209.78   22.60
  -8   3   1  258.77   18.10
  -8   3   1  232.68   25.90
  -8   3   1  248.48   24.40
  -8  -3  -1  275.97   26.40
  -8  -3  -1  243.38   27.00
  -8  -3  -1  262.87   20.50
  -8  -3  -1  302.57   20.20
  -8  -3  -1  270.87   22.80
   8  -3  -1  211.38   21.10
   8  -3  -1  242.48   18.60
   8  -3  -1  248.68   23.70
   8  -3  -1  228.98   15.40
   8   3   1  217.08   20.60
   8  -3  -1  240.98   26.30
   8   3   1  186.48   18.00
  -8  -3  -2  499.75   35.30
  -8  -3  -2  480.95   42.00
  -8   3   2  520.25   40.50
  -8   3   2  550.04   39.90
  -8  -3  -2  591.74   44.20
  -8  -3  -2  544.05   36.60
  -8   3   2  502.15   42.90
  -8   3   2  575.94   47.10
  -8  -3  -2  522.45   38.10
   8  -3  -2  483.35   37.20
   8   3   2  497.25   41.10
   8  -3  -2  498.55   36.70
   8   3   2  515.75   32.30
   8   3   2  441.76   36.30
   8  -3  -2  496.45   24.10
   8  -3  -2  443.26   40.70
   8  -3  -2  461.65   32.10
   8   3   2  491.45   31.70
  -8   3   3  242.48   35.00
  -8  -3  -3  313.87   44.20
  -8  -3  -3  294.77   32.10
  -8   3   3  347.87   35.70
  -8   3   3  329.87   31.00
  -8  -3  -3  298.07   34.20
  -8   3   3  291.37   42.80
  -8  -3  -3  312.17   33.80
  -8  -3  -3  307.47   31.30
  -8  -3  -3  375.76   40.30
  -8  -3  -3  271.57   30.60
   8  -3  -3  321.67   30.70
   8  -3  -3  278.77   31.20
   8   3   3  380.86   40.10
   8  -3  -3  322.67   39.10
   8   3   3  332.87   31.90
   8  -3  -3  317.67   34.00
   8   3   3  328.77   29.90
   8  -3  -3  314.77   15.40
  -8   3   4   58.09   23.70
  -8  -3  -4   43.90   19.20
  -8  -3  -4   73.99   27.20
  -8  -3  -4  100.49   26.10
  -8  -3  -4   27.10   21.00
  -8  -3  -4   22.80   15.60
  -8   3   4   -4.00   18.90
  -8   3   4   31.30   18.20
  -8  -3  -4   44.80   23.10
  -8   3   4   43.00   19.30
   8  -3  -4   29.80    7.30
   8  -3  -4   25.70    7.40
   8  -3  -4    9.40   21.10
   8  -3  -4   18.40   17.90
   8   3   4   43.20   20.30
   8   3   4   24.40   18.00
  -8   3   5   25.50   21.20
  -8   3   5   66.99   29.00
  -8  -3  -5   13.60   23.90
  -8   3   5   57.69   23.40
  -8  -3  -5   52.19   25.50
  -8  -3  -5   36.90   24.60
  -8  -3  -5   56.29   25.80
   8  -3  -5   50.39   29.30
   8   3   5   35.40   25.80
   8  -3  -5   10.40   43.40
   8  -3  -5   28.30   10.70
   8   3   5   17.40   21.80
  -9   3  -5   60.29   29.20
  -9  -3   5   45.40   25.30
  -9   3  -5   84.99   32.70
  -9   3  -5   65.99   29.70
  -9  -3   5   68.39   28.30
  -9   3  -5   60.99   29.60
   9   3  -5   71.59   26.00
   9  -3   5  106.79   31.00
   9  -3   5   53.49   28.70
   9   3  -5   49.30   28.00
  -9   3  -4  120.59   31.80
  -9   3  -4  126.29   31.00
  -9   3  -4  143.19   30.50
  -9  -3   4  164.58   31.20
  -9  -3   4  133.99   28.40
   9  -3   4  124.79   30.70
   9   3  -4  154.18   27.10
   9  -3   4  125.69   33.20
   9   3  -4  164.58   32.40
   9  -3   4  119.19   35.00
  -9   3  -3  332.97   34.40
  -9   3  -3  294.67   43.30
  -9   3  -3  266.77   30.80
  -9  -3   3  290.77   31.50
  -9  -3   3  280.77   29.40
  -9   3  -3  294.27   42.10
  -9   3  -3  355.56   39.60
  -9  -3   3  305.67   31.90
   9  -3   3  304.27   40.40
   9   3  -3  259.37   27.50
   9   3  -3  343.77   30.90
   9   3  -3  279.97   37.90
  -9  -3   2   18.90    9.40
  -9  -3   2   22.80   11.50
  -9  -3   2    6.10    9.60
  -9  -3   2   43.30   18.00
  -9   3  -2   27.00   15.10
  -9  -3   2   24.90   10.80
  -9   3  -2   33.90   14.10
  -9   3  -2   15.80   12.00
  -9   3  -2   15.30   14.00
  -9   3  -2   15.60   14.00
  -9   3  -2   26.00   11.00
   9  -3   2   23.00   12.80
   9  -3   2   17.50   14.60
   9  -3   2   11.70   10.40
   9  -3   2   29.80   16.20
   9   3  -2   21.80    9.70
   9   3  -2    3.60   10.20
  -9  -3   1  432.26   24.30
  -9  -3   1  450.45   23.40
  -9   3  -1  393.26   36.00
  -9  -3   1  463.45   28.80
  -9   3  -1  431.96   33.50
  -9   3  -1  457.05   36.50
  -9   3  -1  422.26   24.00
  -9  -3   1  405.16   29.70
  -9   3  -1  491.85   39.70
  -9  -3   1  447.16   23.10
  -9   3  -1  464.65   36.00
  -9  -3   1  466.75   28.50
   9  -3   1  355.36   29.40
   9   3  -1  402.46   29.10
   9  -3   1  451.85   37.60
   9   3  -1  424.66   26.20
   9  -3   1  443.06   34.10
   9  -3   1  395.46   24.70
   9  -3   1  461.25   37.60
  -9   3   0  527.15   40.00
  -9  -3   0  519.95   24.10
  -9  -3   0  542.25   32.70
  -9   3   0  534.45   36.70
  -9  -3   0  494.65   29.80
  -9  -3   0  556.14   31.60
  -9   3   0  535.45   35.20
  -9  -3   0  506.35   28.00
  -9  -3   0  533.95   34.10
   9  -3   0  537.95   41.30
   9  -3   0  518.65   33.60
   9  -3   0  522.65   36.20
   9   3   0  535.25   28.90
   9  -3   0  469.45   38.60
  -9   3   1  410.36   25.90
  -9  -3  -1  372.46   34.30
  -9   3   1  378.46   32.00
  -9  -3  -1  432.96   31.40
  -9   3   1  402.66   35.60
  -9  -3  -1  455.85   29.70
  -9   3   1  436.26   34.10
  -9  -3  -1  391.56   25.60
  -9  -3  -1  437.56   31.00
   9  -3  -1  441.46   27.40
   9  -3  -1  538.65   40.30
   9  -3  -1  445.36   21.40
   9   3   1  435.96   30.90
   9  -3  -1  463.15   31.90
   9  -3  -1  442.76   34.30
   9   3   1  442.56   28.60
  -9   3   2    0.90   13.80
  -9   3   2    9.80   11.30
  -9  -3  -2    8.40    8.40
  -9  -3  -2   10.00    9.80
  -9  -3  -2   24.10   12.70
  -9  -3  -2   19.20   10.80
  -9   3   2    8.30   12.80
  -9  -3  -2  -16.10    9.00
   9  -3  -2   16.30   12.00
   9  -3  -2    4.50   10.50
   9  -3  -2   11.20   12.40
   9   3   2   35.90   14.00
   9  -3  -2   37.10   11.30
   9   3   2    6.70    8.30
  -9  -3  -3  330.47   45.70
  -9  -3  -3  221.28   33.10
  -9   3   3  249.78   40.70
  -9  -3  -3  306.97   31.70
  -9  -3  -3  230.88   38.10
  -9  -3  -3  264.67   38.60
  -9  -3  -3  287.77   30.30
  -9   3   3  250.17   34.70
  -9  -3  -3  285.67   40.60
  -9   3   3  268.47   37.90
   9   3   3  360.66   32.30
   9  -3  -3  286.47   32.50
   9  -3  -3  279.07   30.10
   9  -3  -3  318.47   44.30
   9  -3  -3  263.97   35.00
   9   3   3  298.07   28.60
  -9  -3  -4   84.89   31.40
  -9  -3  -4  156.58   28.10
  -9   3   4  130.79   28.60
  -9  -3  -4   74.99   27.90
  -9   3   4  101.29   33.30
  -9  -3  -4  103.59   28.60
  -9   3   4  114.59   28.80
  -9   3   4   84.19   25.10
  -9  -3  -4  140.49   30.40
  -9  -3  -4  136.89   33.50
   9   3   4  140.99   31.10
   9   3   4  205.18   33.40
   9  -3  -4  144.99   34.60
   9  -3  -4  149.69   29.10
  -9   3   5   57.89   25.70
  -9  -3  -5  102.79   37.10
  -9  -3  -5  129.69   33.70
  -9   3   5  144.99   36.20
  -9  -3  -5  106.19   31.80
   9  -3  -5   85.59   33.30
   9   3   5   29.20   22.40
   9   3   5   44.20   26.20
   9  -3  -5   87.29   35.90
 -10  -3   5  -12.80   19.90
 -10   3  -5   23.20   25.30
 -10  -3   5   25.50   22.80
 -10   3  -5   19.30   23.20
  10  -3   5  -20.80   17.50
  10   3  -5   23.60   26.10
  10  -3   5    0.20   24.20
 -10   3  -4  -12.20   16.90
 -10   3  -4   10.70   18.80
 -10   3  -4  -13.00   14.30
 -10  -3   4   -5.50   14.00
  10   3  -4  -40.10   16.80
  10  -3   4    0.10   17.00
  10  -3   4   13.40   20.00
  10  -3   4   10.80   18.40
 -10   3  -3  129.89   31.30
 -10  -3   3  186.28   27.90
 -10  -3   3  231.88   39.40
 -10   3  -3  146.59   29.60
 -10   3  -3  152.98   33.20
 -10   3  -3  145.59   26.30
 -10  -3   3  163.48   25.50
 -10  -3   3  122.09   25.80
 -10   3  -3  219.28   36.90
  10  -3   3  218.28   34.30
  10   3  -3  213.18   28.20
  10   3  -3  195.58   30.80
  10  -3   3  194.18   36.00
  10   3  -3  213.18   25.10
 -10  -3   2  263.07   44.40
 -10   3  -2  306.87   34.30
 -10  -3   2  292.87   25.00
 -10  -3   2  276.57   27.90
 -10   3  -2  311.07   31.10
 -10  -3   2  315.87   27.30
 -10   3  -2  267.97   24.00
 -10   3  -2  293.67   40.30
 -10   3  -2  324.07   36.90
  10  -3   2  317.07   32.10
  10  -3   2  358.96   37.60
  10   3  -2  286.87   25.00
  10   3  -2  247.98   23.20
  10   3  -2  315.67   28.80
  10  -3   2  348.77   33.40
  10  -3   2  313.67   27.70
 -10   3  -1  199.58   14.20
 -10  -3   1  218.58   20.40
 -10   3  -1  240.98   31.90
 -10   3  -1  223.48   33.80
 -10   3  -1  184.88   29.80
 -10   3  -1  183.68   27.30
 -10  -3   1  208.88   15.60
 -10  -3   1  198.28   14.10
 -10   3  -1  172.68   25.20
 -10  -3   1  202.78   21.30
 -10  -3   1  184.98   18.50
  10  -3   1  165.18   25.50
  10  -3   1  202.68   31.20
  10  -3   1  202.18   14.90
  10  -3   1  206.18   30.80
  10  -3   1  205.48   21.20
  10   3  -1  178.78   17.10
  10   3  -1  181.58   20.10
 -10   3   0   25.30   11.90
 -10  -3   0   42.40   11.50
 -10  -3   0   39.80    9.70
 -10   3   0   66.09   17.70
 -10   3   0   35.20   14.00
 -10   3   0   34.60   12.90
 -10  -3   0   26.30    9.50
 -10  -3   0   45.10   12.50
  10   3   0   37.00   16.20
  10   3   0   51.19    9.90
  10  -3   0   37.00   14.50
  10  -3   0   49.80   13.20
  10  -3   0   59.89   17.00
 -10  -3  -1  182.58   21.50
 -10  -3  -1  210.78   20.60
 -10  -3  -1  201.48   22.20
 -10  -3  -1  235.38   17.40
 -10  -3  -1  163.08   28.60
 -10   3   1  220.88   24.50
 -10   3   1  185.28   30.50
 -10   3   1  224.68   30.40
 -10  -3  -1  222.58   30.40
  10  -3  -1  183.88   18.90
  10   3   1  202.18   19.30
  10  -3  -1  200.48   21.60
  10   3   1  200.08   21.60
  10  -3  -1  214.48   39.30
  10  -3  -1  190.98   30.50
 -10  -3  -2  328.07   27.30
 -10   3   2  327.17   37.00
 -10   3   2  321.67   33.80
 -10  -3  -2  322.47   29.40
 -10  -3  -2  280.67   29.00
 -10  -3  -2  300.67   31.90
 -10   3   2  314.57   32.70
 -10  -3  -2  381.66   39.90
  10  -3  -2  283.27   22.80
  10   3   2  278.17   19.90
  10  -3  -2  339.47   32.40
  10  -3  -2  331.97   29.80
  10   3   2  334.37   28.80
  10   3   2  290.67   21.70
  10   3   2  310.27   29.80
  10  -3  -2  325.97   37.30
 -10  -3  -3  184.88   35.40
 -10   3   3  190.48   34.90
 -10  -3  -3  216.48   39.20
 -10   3   3  180.58   31.40
 -10  -3  -3  185.48   28.60
 -10   3   3  212.58   33.60
 -10  -3  -3  204.78   31.80
 -10  -3  -3  192.38   30.10
 -10  -3  -3  236.18   36.70
  10  -3  -3  163.28   25.80
  10  -3  -3  153.18   27.50
  10  -3  -3  181.48   34.10
  10   3   3  148.29   22.30
  10  -3  -3  146.09   27.40
 -10  -3  -4   23.60   19.90
 -10  -3  -4    3.10   13.90
 -10   3   4   26.10   18.80
 -10  -3  -4    5.80   14.80
 -10  -3  -4    2.40   18.90
 -10  -3  -4   22.30   17.70
 -10   3   4  -16.80   16.30
 -10  -3  -4  -43.70   19.50
  10   3   4    6.30   16.50
  10  -3  -4   24.80   25.50
  10  -3  -4  -10.90   15.60
 -10   3   5   48.40   23.80
 -10  -3  -5   18.80   21.90
  10  -3  -5   56.99   28.80
  10   3   5    1.10   22.00
  10  -3  -5   -8.90   28.90
 -11   3  -4  192.28   42.30
 -11   3  -4  115.79   34.60
 -11  -3   4  125.99   28.20
 -11  -3   4  153.28   29.10
 -11  -3   4  143.09   29.90
 -11   3  -4  129.09   31.20
  11   3  -4  181.38   33.90
  11  -3   4  156.18   33.60
  11   3  -4  149.59   28.20
  11  -3   4  197.78   39.70
  11  -3   4  202.18   38.20
  11  -3   4  137.29   33.80
 -11   3  -3  104.69   34.00
 -11  -3   3   77.59   22.40
 -11   3  -3  107.29   21.80
 -11  -3   3   74.09   25.10
 -11  -3   3   96.19   23.00
 -11   3  -3   56.19   20.50
 -11  -3   3   73.39   20.00
 -11   3  -3   75.09   24.90
  11   3  -3   77.99   18.30
  11   3  -3   43.90   19.70
  11  -3   3   84.99   23.10
  11  -3   3  147.99   33.60
  11   3  -3   95.59   20.00
 -11   3  -2   39.50   10.80
 -11   3  -2   32.80   19.30
 -11  -3   2   31.10   10.80
 -11  -3   2   24.70   13.30
 -11   3  -2   18.40   16.60
 -11  -3   2   22.70   11.60
 -11   3  -2   47.10   17.80
 -11  -3   2    7.50   10.80
 -11   3  -2   10.60   12.10
  11   3  -2   26.00   11.30
  11  -3   2   42.00   15.90
  11  -3   2   33.90   11.90
  11   3  -2   40.40   11.20
  11   3  -2   40.30   14.50
 -11   3  -1  421.36   39.10
 -11   3  -1  366.56   35.70
 -11  -3   1  375.06   30.40
 -11  -3   1  317.67   21.70
 -11  -3   1  317.97   27.50
 -11   3  -1  321.77   31.80
 -11   3  -1  349.27   38.80
 -11   3  -1  371.36   35.70
 -11  -3   1  332.77   26.90
  11  -3   1  426.06   35.40
  11  -3   1  446.96   39.80
  11   3  -1  416.66   30.40
  11  -3   1  421.96   31.50
  11   3  -1  486.45   38.40
 -11   3   0  163.38   25.60
 -11  -3   0  193.68   21.20
 -11   3   0  180.28   24.30
 -11  -3   0  209.08   33.30
 -11  -3   0  230.98   20.20
 -11  -3   0  211.88   21.00
 -11  -3   0  199.18   22.30
 -11   3   0  192.18   29.90
  11  -3   0  204.68   22.20
  11  -3   0  207.98   23.80
  11  -3   0  218.88   28.80
  11   3   0  185.38   17.20
  11  -3   0  234.78   32.60
  11   3   0  214.58   20.90
 -11   3   1  401.86   36.40
 -11  -3  -1  408.46   32.90
 -11  -3  -1  417.16   33.50
 -11  -3  -1  449.06   42.10
 -11  -3  -1  434.56   30.70
 -11   3   1  395.36   36.30
 -11  -3  -1  413.96   23.60
 -11   3   1  426.86   39.60
  11   3   1  335.77   29.60
  11   3   1  339.07   27.20
  11  -3  -1  370.86   30.40
  11  -3  -1  396.16   37.40
  11  -3  -1  352.66   32.20
 -11  -3  -2   31.70   15.60
 -11   3   2   64.39   20.80
 -11   3   2   15.30   13.90
 -11  -3  -2   42.10   13.60
 -11  -3  -2   14.80   10.60
 -11   3   2   24.10   14.30
 -11  -3  -2   35.00   16.80
 -11  -3  -2    4.60   10.30
  11  -3  -2   59.19   21.50
  11   3   2   24.00   11.60
  11   3   2   37.00    7.30
  11   3   2   18.70   12.10
  11   3   2   40.00    8.10
  11  -3  -2   22.20   13.90
  11  -3  -2   36.50   16.60
  11  -3  -2   25.10   13.90
 -11  -3  -3   78.39   24.60
 -11   3   3   77.99   22.80
 -11  -3  -3   80.59   24.70
 -11   3   3   89.99   24.70
 -11  -3  -3   70.09   26.10
 -11  -3  -3  101.39   22.60
 -11  -3  -3  116.99   31.00
 -11   3   3  103.79   29.20
 -11  -3  -3   98.59   21.90
  11  -3  -3  112.79   24.90
  11  -3  -3  159.08   33.60
  11  -3  -3  132.39   21.90
  11   3   3  115.59   21.10
 -11   3   4  185.08   36.20
 -11  -3  -4  185.58   41.20
 -11  -3  -4  204.18   36.00
 -11  -3  -4  124.09   31.40
 -11   3   4  140.79   32.60
 -11  -3  -4  152.08   35.60
 -11  -3  -4  137.39   32.70
 -11  -3  -4  150.78   37.40
  11  -3  -4  171.28   35.00
  11   3   4  138.79   26.30
  11  -3  -4  143.09   38.30
 -12   3  -4    6.40   19.90
 -12   3  -4   51.09   26.40
 -12  -3   4   -2.20   15.90
 -12  -3   4   29.00   15.50
 -12  -3   4   30.90   19.50
  12  -3   4   11.20   24.00
  12  -3   4   -2.60   19.80
  12   3  -4   18.10   19.80
  12  -3   4   -1.30   20.60
  12   3  -4   43.30   27.20
  12  -3   4   35.80   23.60
 -12  -3   3  159.28   28.10
 -12  -3   3  215.48   25.60
 -12   3  -3  191.98   26.70
 -12  -3   3  174.78   31.90
 -12   3  -3  150.78   34.20
 -12  -3   3  140.39   26.40
 -12   3  -3  188.38   31.60
 -12   3  -3  173.28   35.20
 -12   3  -3  158.48   36.50
  12   3  -3  140.69   27.00
  12   3  -3  157.18   23.90
  12   3  -3  169.88   24.90
  12  -3   3  173.18   32.40
  12  -3   3  221.48   35.40
  12  -3   3  210.98   39.80
 -12  -3   2  191.98   17.80
 -12  -3   2  159.18   23.10
 -12   3  -2  186.88   33.30
 -12  -3   2  177.88   26.50
 -12   3  -2  193.98   35.90
 -12   3  -2  168.48   31.60
 -12   3  -2  155.78   17.50
 -12  -3   2  180.18   29.60
 -12   3  -2  148.79   27.00
  12  -3   2  103.69   25.40
  12  -3   2  127.59   19.40
  12  -3   2  125.49   26.50
  12  -3   2  104.39   27.90
 -12   3  -1  128.79   23.70
 -12   3  -1  160.48   28.80
 -12  -3   1  168.48   22.90
 -12   3  -1  113.39   26.10
 -12  -3   1  162.18   21.30
 -12   3  -1  159.98   31.10
 -12  -3   1  127.39   21.50
 -12   3  -1  156.38   30.40
 -12  -3   1  133.09   14.10
  12  -3   1  197.48   28.90
  12   3  -1  183.98   18.10
  12  -3   1  220.28   34.20
  12   3  -1  141.59   20.90
  12  -3   1  176.28   23.50
 -12   3   0   17.10   13.20
 -12   3   0   17.20   14.30
 -12  -3   0   10.30   10.10
 -12  -3   0   16.90    9.20
 -12  -3   0    5.10    9.70
 -12  -3   0   -6.20    9.50
 -12  -3   0   20.20   18.00
 -12   3   0   10.40   11.20
 -12   3   0   -1.80   11.80
  12  -3   0    4.40    8.50
  12  -3   0    0.30   11.00
  12   3   0    4.90    9.40
  12   3   0    2.80    9.20
  12  -3   0    9.10   14.60
 -12   3   1  220.98   32.10
 -12  -3  -1  182.98   33.40
 -12  -3  -1  180.18   26.50
 -12  -3  -1  196.18   13.50
 -12   3   1  180.38   30.30
 -12  -3  -1  192.28   26.60
 -12   3   1  170.88   17.90
 -12   3   1  187.58   27.80
 -12  -3  -1  226.68   23.20
 -12  -3  -1  224.38   33.80
  12  -3  -1  139.99   21.00
  12  -3  -1  186.88   31.70
  12   3   1  182.98   20.10
  12   3   1  152.48   23.70
 -12   3   2  100.69   24.20
 -12   3   2   93.59   22.40
 -12   3   2   93.39   23.20
 -12  -3  -2  113.39   18.70
 -12  -3  -2  144.39   28.70
 -12  -3  -2  130.39   23.40
 -12  -3  -2  114.09   24.00
  12  -3  -2  196.58   43.20
  12  -3  -2  131.59   21.40
  12   3   2  153.78   24.30
  12  -3  -2  197.98   33.40
  12  -3  -2  169.48   13.90
  12   3   2  165.48   26.50
 -12  -3  -3  199.58   34.90
 -12   3   3  217.18   33.90
 -12  -3  -3  190.18   37.60
 -12  -3  -3  180.58   35.20
 -12   3   3  122.69   34.90
 -12   3   3  215.98   39.30
 -12  -3  -3  160.38   33.60
 -12  -3  -3  166.98   28.90
 -12  -3  -3  179.68   29.00
  12  -3  -3  140.49   23.00
  12  -3  -3  178.78   35.80
  12   3   3  152.48   20.60
  12   3   3  180.48   20.50
  12  -3  -3  156.28   29.50
 -12  -3  -4   17.10   18.20
 -12  -3  -4   17.50   18.30
 -12  -3  -4   65.29   26.00
 -12   3   4   80.19   28.10
 -12  -3  -4   27.20   22.50
 -12  -3  -4   41.40   21.80
  12  -3  -4   39.70   23.20
  12   3   4   -5.20   21.00
  12   3   4    1.50   15.30
  12  -3  -4   40.70   29.80
 -13   3  -4  154.48   39.60
 -13  -3   4   94.59   31.40
 -13   3  -4  135.29   37.10
 -13  -3   4   90.39   25.00
  13  -3   4  132.49   31.90
  13   3  -4  202.48   41.70
  13  -3   4  131.09   37.90
  13  -3   4   43.30   25.40
  13  -3   4  105.59   37.00
 -13   3  -3  137.49   24.30
 -13  -3   3  126.59   24.30
 -13   3  -3   81.69   28.10
 -13   3  -3  115.79   26.30
 -13   3  -3   94.69   31.00
 -13  -3   3   97.49   21.50
 -13  -3   3   77.69   22.00
  13  -3   3   68.99   27.70
  13  -3   3  104.29   26.10
  13  -3   3   93.59   26.30
  13   3  -3  108.89   20.90
  13   3  -3   79.59   22.90
  13  -3   3  133.69   30.00
 -13  -3   2   30.40   16.80
 -13  -3   2   68.09   18.20
 -13   3  -2    7.10   15.30
 -13   3  -2   50.39   18.30
 -13   3  -2   45.80   11.20
 -13   3  -2   24.00   18.30
 -13   3  -2   36.90   22.30
 -13  -3   2   50.29   14.60
  13   3  -2   72.49   18.30
  13  -3   2   27.60   19.80
  13   3  -2   22.50   11.60
  13  -3   2   60.29   20.00
 -13  -3   1   15.80    9.70
 -13   3  -1    4.30   15.20
 -13  -3   1   -6.30   10.20
 -13   3  -1   20.80   15.20
 -13   3  -1    1.90   11.80
 -13   3  -1   25.10   14.20
 -13  -3   1    2.40    7.40
 -13  -3   1   10.40   10.00
  13  -3   1    3.70   11.70
  13  -3   1   21.20   14.30
  13   3  -1    4.20    9.70
 -13  -3   0  417.16   34.80
 -13  -3   0  452.05   32.30
 -13  -3   0  487.95   45.20
 -13  -3   0  444.06   35.60
 -13  -3   0  372.86   32.90
 -13   3   0  460.65   42.40
 -13   3   0  454.25   43.00
 -13   3   0  451.95   35.70
 -13   3   0  442.86   38.50
  13  -3   0  360.76   39.00
  13   3   0  420.86   29.30
  13  -3   0  429.16   31.30
  13  -3   0  433.86   37.70
 -13   3   1    9.20   13.70
 -13  -3  -1    8.90   16.70
 -13  -3  -1   24.50   13.60
 -13   3   1  -11.80   12.90
 -13   3   1   -1.60    9.20
 -13  -3  -1   16.20   12.30
 -13   3   1   13.80   15.10
 -13  -3  -1   10.00   10.30
  13  -3  -1   23.00   15.70
  13  -3  -1    8.10   13.40
  13   3   1    3.70   11.60
  13   3   1   10.70    9.10
  13  -3  -1    9.00   11.40
 -13  -3  -2    9.30   15.40
 -13  -3  -2   43.00   13.00
 -13  -3  -2   61.89   21.20
 -13   3   2   47.90   19.00
 -13  -3  -2   41.20   19.00
 -13  -3  -2   34.00   23.10
 -13   3   2   74.19   21.40
  13   3   2   61.29   18.60
  13   3   2   69.09   16.20
  13  -3  -2   30.90   18.50
  13  -3  -2   22.40   15.40
  13  -3  -2   37.70   14.60
 -13  -3  -3   96.49   24.30
 -13  -3  -3  106.39   30.20
 -13  -3  -3   68.09   24.00
 -13  -3  -3   76.79   25.80
 -13   3   3  108.39   25.60
 -13   3   3   82.99   33.70
 -13  -3  -3   93.49   26.50
 -13   3   3  139.59   28.40
 -13  -3  -3  111.39   23.80
  13  -3  -3  121.29   30.80
  13  -3  -3  114.09   26.90
  13   3   3  132.09   22.30
  13  -3  -3  104.19   19.70
  13   3   3  108.69   15.80
 -13  -3  -4  181.98   39.70
 -13  -3  -4  129.69   33.50
 -13   3   4  211.38   41.90
  13  -3  -4  195.48   40.70
 -14  -3   4   -8.50   16.10
 -14  -3   4  -18.80   19.60
 -14   3  -4   46.20   28.90
 -14   3  -4   -2.40   22.60
  14  -3   4   18.30   25.60
  14  -3   4   -4.90   18.70
  14  -3   4  -15.40   21.40
 -14   3  -3   74.79   30.30
 -14  -3   3   75.59   15.80
 -14  -3   3  110.29   29.40
 -14  -3   3  133.79   24.90
 -14  -3   3   65.69   20.60
 -14   3  -3  123.89   33.00
 -14   3  -3   41.90   19.50
  14  -3   3  128.09   31.80
  14  -3   3   68.79   22.70
  14  -3   3  110.09   31.40
  14   3  -3   76.39   21.60
  14   3  -3   32.00   22.70
 -14   3  -2  107.49   29.00
 -14  -3   2   95.59   20.30
 -14   3  -2   76.59   28.70
 -14  -3   2  116.49   25.00
 -14   3  -2   97.89   22.70
 -14  -3   2   98.29   21.20
  14   3  -2  111.89   19.10
  14  -3   2  190.98   38.10
  14  -3   2  110.49   26.80
 -14   3  -1   65.09   24.10
 -14  -3   1   67.69   15.50
 -14   3  -1   43.50   17.40
 -14   3  -1   29.70   22.00
 -14  -3   1   26.90   10.30
 -14  -3   1   37.20   16.00
 -14   3  -1   64.49   23.40
 -14  -3   1   49.10   10.30
  14  -3   1   45.60   19.20
  14   3  -1   53.79   12.20
  14  -3   1   37.10   13.80
  14  -3   1   16.10   14.80
 -14   3   0   46.70   18.60
 -14  -3   0   37.10   16.80
 -14   3   0   66.39   20.60
 -14   3   0   57.09   20.20
 -14  -3   0   60.79   16.20
 -14  -3   0   39.50   20.70
 -14  -3   0   60.09   19.30
 -14  -3   0   76.29   15.60
  14  -3   0   82.99   23.90
  14  -3   0   46.90   13.40
  14   3   0   38.20   15.70
  14   3   0   34.10   10.80
 -14  -3  -1   45.40   17.00
 -14   3   1   35.80   12.20
 -14   3   1   38.90   19.10
 -14  -3  -1   45.70   18.70
 -14  -3  -1   50.29   23.50
 -14   3   1   76.09   23.10
 -14   3   1   67.69   21.30
 -14  -3  -1   43.40   14.40
  14   3   1   33.90   12.60
  14  -3  -1   14.10   17.00
  14  -3  -1   47.00   13.40
  14   3   1   36.30   16.30
 -14  -3  -2  125.49   38.10
 -14  -3  -2  127.29   22.90
 -14  -3  -2   96.39   24.20
 -14  -3  -2  135.99   33.40
 -14  -3  -2  106.29   15.10
 -14   3   2  126.09   26.60
 -14   3   2   51.99   25.00
  14   3   2  152.08   26.50
  14   3   2   83.39   18.70
  14  -3  -2   77.59   25.10
 -14   3   3  105.89   26.70
 -14  -3  -3   68.89   25.90
 -14  -3  -3   67.09   22.00
 -14  -3  -3   81.69   27.60
 -14  -3  -3  103.49   25.80
 -14   3   3   95.69   26.30
 -14  -3  -3  125.39   28.80
 -14  -3  -3  143.29   37.30
  14  -3  -3   73.59   16.30
  14  -3  -3   80.79   28.40
  14  -3  -3   56.69   29.40
 -14  -3  -4  -22.60   19.40
 -14  -3  -4    6.00   23.00
 -14  -3  -4    7.30   19.00
 -14  -3  -4   49.10   30.60
 -14   3   4   50.89   23.20
  14  -3  -4   20.80   32.60
 -15  -3   3   10.20   17.50
 -15  -3   3   21.20   16.30
 -15   3  -3    7.80   20.50
 -15   3  -3  -38.70   16.60
  15  -3   3   66.19   24.20
  15  -3   3   32.90   27.60
  15   3  -3   -6.30   20.40
  15  -3   3    1.40   20.90
 -15  -3   2   17.20   14.80
 -15   3  -2   12.50   25.00
 -15  -3   2   39.30   18.10
 -15   3  -2   44.90   26.30
 -15   3  -2   -0.40   16.10
 -15   3  -2   35.80   17.80
 -15  -3   2   65.59   18.70
  15   3  -2   23.00   14.70
  15   3  -2   15.70   22.90
  15  -3   2   25.50   21.90
  15  -3   2   31.30   20.70
 -15  -3   1   99.29   13.40
 -15   3  -1   78.69   22.00
 -15   3  -1   76.99   26.70
 -15  -3   1  101.09   21.00
 -15  -3   1  133.49   24.60
 -15   3  -1   40.30   26.70
 -15  -3   1  101.59   22.30
 -15   3  -1   60.39   25.40
  15  -3   1   96.99   26.00
  15  -3   1  103.99   31.90
  15  -3   1   94.59   18.80
  15   3  -1  123.49   18.60
 -15   3   0  131.99   30.10
 -15   3   0  171.68   32.60
 -15  -3   0  176.28   28.60
 -15  -3   0  118.49   23.60
 -15  -3   0  118.49   20.40
 -15   3   0  179.58   28.10
 -15  -3   0  147.99   33.80
 -15   3   0  111.49   25.10
  15   3   0  135.99   19.40
  15  -3   0  203.98   33.30
 -15  -3  -1  104.79   24.90
 -15   3   1  100.89   24.60
 -15  -3  -1  109.49   22.40
 -15   3   1  104.69   26.40
 -15  -3  -1  159.48   37.00
 -15  -3  -1  108.09   21.50
 -15   3   1  110.69   17.50
  15   3   1   80.69   19.90
  15   3   1   74.29   17.60
  15  -3  -1  102.19   28.40
  15  -3  -1   66.49   23.00
  15  -3  -1   66.39   19.90
 -15  -3  -2   33.20    8.60
 -15  -3  -2   10.20   19.60
 -15   3   2   17.10   19.00
 -15   3   2   68.39   21.70
 -15  -3  -2   31.40   18.60
 -15  -3  -2   36.00   17.10
 -15   3   2    9.40   26.70
 -15  -3  -2   54.79   26.00
  15  -3  -2   44.40   24.00
  15   3   2   10.60   15.80
  15   3   2   29.80   31.70
 -15  -3  -3  -15.10   17.40
 -15  -3  -3   16.60   23.10
 -15  -3  -3   51.89   23.50
 -15   3   3    8.40   21.10
  15  -3  -3   49.70   31.90
 -16   3  -2  131.69   34.20
 -16  -3   2  123.19   26.90
 -16   3  -2  105.09   29.80
 -16  -3   2  133.79   24.40
  16  -3   2  126.99   34.70
  16  -3   2  144.39   27.90
 -16   3  -1   79.69   25.10
 -16   3  -1   71.19   28.40
 -16   3  -1   77.49   22.20
 -16   3  -1   33.20   24.50
 -16  -3   1   51.79   20.40
 -16  -3   1   83.19   12.20
 -16  -3   1   54.59   16.20
 -16  -3   1   47.10   10.30
 -16  -3   1   70.49   18.40
  16  -3   1  133.59   27.10
  16  -3   1  122.89   36.00
  16   3  -1   78.69   19.60
 -16  -3   0   14.60   11.40
 -16   3   0    2.50   16.70
 -16  -3   0  -29.20   17.30
 -16   3   0   24.50   20.80
 -16   3   0   11.40   18.40
 -16   3   0    3.30   21.80
 -16  -3   0    6.00   13.20
 -16  -3   0   -8.40   16.30
 -16   3   0   16.70   17.00
  16   3   0   23.00   12.80
  16  -3   0   14.90   14.30
  16  -3   0   14.10   17.90
  16  -3   0   -2.00   15.60
 -16  -3  -1   60.19   24.70
 -16   3   1   57.59   22.90
 -16   3   1   70.99   15.50
 -16   3   1  101.49   25.70
 -16  -3  -1  125.59   27.30
 -16   3   1   54.69   22.20
 -16  -3  -1   93.99   22.60
 -16  -3  -1  105.89   20.10
  16  -3  -1   57.79   22.50
  16  -3  -1   78.79   25.70
  16   3   1   56.49   17.20
  16   3   1   59.29   21.50
 -16  -3  -2  154.18   27.00
 -16  -3  -2  109.19   34.20
 -16   3   2  104.99   28.10
 -16  -3  -2   84.39   25.30
  16  -3  -2  100.89   28.30
  16   3   2  118.79   25.20
 -17   3  -2   47.70   23.90
 -17   3  -2    8.80   20.70
 -17  -3   2  -19.40   18.40
  17  -3   2   18.90   23.90
 -17   3  -1   52.79   27.60
 -17   3  -1   39.90   23.10
 -17  -3   1  101.59   25.20
 -17  -3   1   54.39   26.00
  17  -3   1   28.80   23.20
 -17   3   0   26.60   20.10
 -17  -3   0   19.70   24.70
 -17   3   0   29.30   26.60
 -17  -3   0   33.60   14.90
 -17  -3   0   26.10   16.90
  17  -3   0   30.20   22.10
  17  -3   0    1.50   19.70
 -17  -3  -1   37.10   15.90
 -17   3   1   25.20   18.00
 -17  -3  -1   13.20   24.30
  17  -3  -1   50.39   24.80
 -17  -3  -2   -1.00   22.80
 -17   3   2   39.90   22.50
 -17  -3  -2  -29.20   16.80
  17  -3  -2    6.50   30.00
 -18   3   0   18.40   21.00
 -18   3   0    5.50   22.00
 -18  -3   0   -3.40   16.80
 -18  -3   0    5.90   16.90
 -18  -3   0  -17.70   23.10
   0   4  -6  104.79   38.00
   0   4  -6   46.30   28.80
   0   4  -6   30.70   27.50
   0   4  -5  436.36   62.19
   0  -4   5  397.76   48.80
   0   4  -5  457.15   47.80
   0   4  -5  385.36   53.59
   0  -4   5  441.46   50.49
   0  -4   4  410.36   41.80
   0   4  -4  395.06   40.60
   0   4  -4  425.76   46.80
   0  -4   4  403.56   42.40
   0   4  -4  401.06   36.90
   0  -4   4  392.56   36.00
   0   4  -4  436.36   46.90
   0  -4   3  254.97   24.80
   0   4  -3  246.18   26.90
   0   4  -3  223.78   34.00
   0   4  -3  216.28   24.30
   0  -4   3  217.58   31.50
   0   4  -3  213.98   23.10
   0   4  -3  257.37   37.90
   0  -4   3  255.97   26.20
   0  -4   3  217.28   24.70
   0   4  -3  258.47   36.20
   0   4  -3  195.08   23.30
   0  -4   2  161.88   18.00
   0   4  -2  151.98   16.60
   0  -4   2  174.68   20.10
   0  -4   2  144.69   17.10
   0   4  -2  176.08   19.20
   0   4  -2  138.59   16.10
   0  -4   2  139.89   16.90
   0   4  -2  161.98   16.60
   0  -4   2  151.28   17.50
   0  -4   2  164.08   15.50
   0   4  -2  195.38   20.10
   0   4  -1 1574.74   66.99
   0   4  -1 1489.95   65.89
   0  -4   1 1537.25   65.99
   0   4  -1 1571.84   65.59
   0  -4   1 1511.85   67.59
   0  -4   1 1544.55   61.19
   0   4  -1 1542.05   67.59
   0  -4   1 1625.54   68.89
   0   4  -1 1554.64   61.69
   0   4  -1 1457.95   67.29
   0  -4   1 1527.95   66.69
   0  -4   1 1511.65   67.09
   0   4   0  592.94   30.20
   0  -4   0  621.44   26.80
   0   4   0  611.34   26.60
   0  -4   0  602.84   30.00
   0  -4   0  651.03   28.80
   0  -4   0  611.64   30.30
   0   4   0  625.24   30.00
   0   4   0  614.44   28.10
   0   4   0  652.23   28.70
   0  -4   0  602.04   28.30
   0   4   1 1563.04   68.49
   0   4   1 1590.64   66.79
   0   4   1 1583.44   67.29
   0   4   1 1429.36   69.19
   0  -4  -1 1568.64   69.39
   0  -4  -1 1597.84   69.19
   0  -4  -1 1485.55   66.69
   0  -4  -1 1491.85   66.99
   0  -4  -1 1595.94   70.59
   0  -4  -2  174.38   25.50
   0  -4  -2  135.69   22.00
   0   4   2  182.18   19.30
   0   4   2  166.68   23.10
   0   4   2  149.39   18.00
   0  -4  -2  161.68   21.70
   0   4   2  174.18   24.70
   0  -4  -2  159.68   22.50
   0   4   2  157.48   17.90
   0  -4  -2  155.78   18.50
   0  -4  -3  252.17   27.70
   0   4   3  291.67   29.10
   0   4   3  256.07   36.60
   0   4   3  286.47   39.40
   0  -4  -3  233.88   36.80
   0   4   3  215.28   25.20
   0   4   3  237.88   28.30
   0  -4  -3  266.07   30.90
   0   4   3  234.18   26.00
   0  -4  -3  212.78   32.40
   0   4   4  355.06   39.70
   0   4   4  474.45   44.90
   0  -4  -4  406.86   45.50
   0  -4  -4  405.56   38.80
   0  -4  -4  390.56   46.30
   0  -4  -4  430.56   40.10
   0  -4  -5  402.26   54.89
   0   4   5  409.06   49.20
   0  -4  -5  374.46   59.39
   0  -4  -5  415.26   57.29
   0   4   5  351.66   50.09
   0  -4  -6  -15.30   22.10
   0  -4  -6   48.50   34.80
   0  -4  -6   63.29   34.90
   0   4   6   51.59   24.50
  -1   4  -6   13.90   27.60
  -1   4  -6   46.10   29.50
  -1   4  -6   36.00   27.10
   1   4  -6   50.29   33.00
   1   4  -6   71.59   38.80
   1   4  -6   50.79   31.00
  -1  -4   5  129.39   32.70
  -1   4  -5  147.39   34.60
  -1   4  -5  204.48   41.80
  -1   4  -5  172.28   38.00
  -1  -4   5  194.28   39.60
   1   4  -5  236.58   40.10
   1   4  -5  221.18   38.60
   1   4  -5  248.28   47.40
   1  -4   5  162.98   37.80
   1  -4   5  212.68   41.30
  -1   4  -4  171.68   31.50
  -1  -4   4  111.89   24.20
  -1   4  -4  130.89   27.90
  -1   4  -4  133.89   25.60
  -1   4  -4  116.79   24.30
  -1  -4   4  136.59   30.80
  -1   4  -4  145.79   33.20
  -1  -4   4  145.89   31.80
   1   4  -4  159.28   30.30
   1   4  -4  135.19   31.70
   1   4  -4  137.59   30.00
   1  -4   4  112.99   27.40
   1  -4   4  130.89   26.10
   1   4  -4  128.99   31.80
   1  -4   4  103.49   27.00
  -1  -4   3  419.76   33.00
  -1   4  -3  421.46   37.70
  -1   4  -3  481.45   38.50
  -1  -4   3  417.06   34.90
  -1   4  -3  460.65   36.30
  -1   4  -3  432.86   35.60
  -1   4  -3  471.35   43.30
  -1  -4   3  544.05   41.70
  -1   4  -3  428.16   35.90
  -1  -4   3  443.86   37.50
   1  -4   3  496.45   35.60
   1   4  -3  581.24   46.30
   1  -4   3  497.45   44.60
   1   4  -3  557.04   39.80
   1   4  -3  519.15   43.00
   1  -4   3  491.75   39.30
   1   4  -3  497.85   36.90
   1  -4   3  502.45   45.20
   1   4  -3  574.54   38.60
   1   4  -3  503.15   34.40
  -1  -4   2  457.45   29.50
  -1   4  -2  508.65   34.00
  -1  -4   2  503.65   34.00
  -1   4  -2  467.85   31.80
  -1   4  -2  462.55   30.80
  -1  -4   2  473.85   31.10
  -1   4  -2  465.85   28.50
  -1   4  -2  477.55   31.30
  -1   4  -2  429.96   31.30
  -1  -4   2  463.05   30.30
  -1  -4   2  483.45   28.40
   1  -4   2  423.06   32.10
   1   4  -2  382.26   30.20
   1   4  -2  391.66   29.80
   1   4  -2  396.26   32.40
   1   4  -2  427.76   29.50
   1  -4   2  365.36   29.00
   1  -4   2  406.76   30.70
   1   4  -2  405.16   27.40
   1   4  -2  393.66   27.90
   1  -4   2  429.56   31.30
   1  -4   2  418.76   31.60
   1  -4   2  388.26   26.80
  -1   4  -1 1287.07   56.29
  -1   4  -1 1205.28   56.59
  -1   4  -1 1278.27   54.99
  -1  -4   1 1213.78   49.40
  -1  -4   1 1198.38   53.49
  -1  -4   1 1225.58   53.79
  -1   4  -1 1189.58   55.59
  -1   4  -1 1245.08   50.59
  -1  -4   1 1210.08   52.99
  -1   4  -1 1282.57   56.19
  -1  -4   1 1197.88   55.89
  -1  -4   1 1210.38   52.39
   1   4  -1 1129.79   54.59
   1   4  -1 1174.88   51.89
   1   4  -1 1150.18   49.60
   1  -4   1 1171.08   55.99
   1  -4   1 1179.28   55.59
   1   4  -1 1225.48   53.89
   1   4  -1 1147.59   52.49
   1  -4   1 1146.79   49.80
   1  -4   1 1170.98   55.09
   1  -4   1 1201.98   56.79
   1  -4   1 1177.38   54.49
  -1   4   0  350.96   21.60
  -1   4   0  345.47   19.80
  -1  -4   0  348.97   19.90
  -1  -4   0  356.06   16.30
  -1  -4   0  348.47   16.90
  -1   4   0  360.36   20.10
  -1   4   0  329.77   18.30
  -1   4   0  339.17   20.10
  -1  -4   0  359.86   18.10
   1   4   0  325.37   16.70
   1  -4   0  346.57   21.90
   1  -4   0  323.07   19.50
   1  -4   0  354.66   20.40
   1   4   0  374.56   18.10
   1   4   0  328.67   20.00
   1  -4   0  346.77   20.00
   1   4   0  336.47   16.50
  -1   4   1 1222.48   59.29
  -1  -4  -1 1200.88   54.39
  -1  -4  -1 1195.78   56.79
  -1  -4  -1 1224.88   57.49
  -1   4   1 1195.78   55.69
  -1  -4  -1 1174.48   56.79
  -1   4   1 1193.18   57.29
  -1   4   1 1139.19   55.09
  -1  -4  -1 1214.58   54.69
   1   4   1 1192.98   54.29
   1  -4  -1 1262.47   59.69
   1  -4  -1 1238.98   54.89
   1  -4  -1 1272.17   56.59
   1  -4  -1 1202.78   56.69
   1   4   1 1279.27   57.69
   1   4   1 1192.38   56.19
   1   4   1 1249.28   53.79
   1  -4  -1 1328.67   56.99
   1  -4  -1 1280.67   58.59
  -1   4   2  417.26   31.70
  -1  -4  -2  405.76   30.20
  -1   4   2  376.26   32.50
  -1   4   2  413.06   30.40
  -1   4   2  410.16   32.20
  -1  -4  -2  367.56   31.20
  -1  -4  -2  377.06   29.80
  -1  -4  -2  366.76   30.30
  -1  -4  -2  418.56   33.70
  -1   4   2  385.66   30.10
   1  -4  -2  439.66   35.10
   1  -4  -2  454.55   31.90
   1  -4  -2  438.56   31.40
   1   4   2  497.35   31.90
   1   4   2  477.25   34.20
   1   4   2  518.85   32.50
   1  -4  -2  432.56   31.30
   1   4   2  520.15   34.70
   1   4   2  509.25   34.00
   1   4   2  489.05   32.10
   1  -4  -2  485.65   35.20
  -1  -4  -3  432.56   43.80
  -1  -4  -3  565.34   43.80
  -1  -4  -3  523.25   44.60
  -1   4   3  528.45   44.70
  -1   4   3  556.34   42.10
  -1   4   3  560.44   40.60
  -1  -4  -3  562.14   40.40
  -1   4   3  555.84   42.50
   1  -4  -3  527.45   40.50
   1  -4  -3  432.86   37.90
   1  -4  -3  410.46   41.80
   1  -4  -3  436.46   40.90
   1   4   3  465.85   38.80
   1   4   3  491.05   42.90
   1   4   3  500.15   41.40
   1   4   3  501.45   39.60
  -1   4   4  150.68   30.60
  -1  -4  -4  165.08   30.50
  -1  -4  -4   96.99   24.30
  -1  -4  -4  138.79   31.50
  -1   4   4  149.19   31.40
  -1  -4  -4  133.59   27.40
  -1  -4  -4  123.69   31.00
  -1  -4  -4   82.59   23.20
   1  -4  -4  182.38   37.00
   1  -4  -4  117.09   27.00
   1  -4  -4  130.49   31.40
   1   4   4  195.28   34.70
   1  -4  -4  150.58   26.40
   1  -4  -4  111.49   27.80
   1   4   4  104.79   27.90
  -1   4   5  247.78   42.50
  -1  -4  -5  237.88   46.60
  -1   4   5  170.98   38.10
  -1  -4  -5  221.88   40.90
  -1  -4  -5  196.38   42.20
   1  -4  -5  237.88   40.00
   1   4   5  256.67   42.50
   1  -4  -5  208.88   45.40
   1  -4  -5  225.28   41.80
   1   4   5  178.78   36.00
  -1  -4  -6   82.79   34.20
  -1  -4  -6   77.19   32.80
  -1  -4  -6   59.19   34.30
   1  -4  -6   69.09   33.60
   1  -4  -6   26.40   29.50
   1   4   6   32.10   26.30
   1  -4  -6   35.20   27.80
  -2   4  -6   66.89   32.20
  -2   4  -6   14.70   27.80
  -2   4  -6   39.30   34.00
   2   4  -6   51.99   30.00
   2   4  -6   68.89   37.30
   2   4  -6   83.49   32.30
   2  -4   6   27.10   29.40
  -2  -4   5  261.67   43.70
  -2   4  -5  216.58   40.20
  -2  -4   5  207.78   41.00
  -2   4  -5  231.18   38.90
   2  -4   5  134.59   33.20
   2  -4   5  150.98   38.40
   2   4  -5  126.79   34.00
   2   4  -5  156.58   34.10
   2   4  -5  192.48   44.00
  -2   4  -4  335.57   35.90
  -2  -4   4  330.27   38.80
  -2   4  -4  324.47   38.30
  -2  -4   4  278.67   32.30
  -2   4  -4  390.36   45.10
  -2   4  -4  392.06   38.80
  -2  -4   4  342.17   38.60
   2  -4   4  354.76   38.70
   2  -4   4  341.27   39.10
   2   4  -4  419.36   34.90
   2   4  -4  346.07   37.30
   2   4  -4  331.47   47.40
   2   4  -4  380.56   38.50
   2  -4   4  324.87   35.00
  -2  -4   3  537.55   42.60
  -2   4  -3  511.85   38.80
  -2  -4   3  482.75   38.70
  -2  -4   3  520.65   36.70
  -2   4  -3  496.25   38.80
  -2  -4   3  491.15   41.10
  -2  -4   3  507.55   36.80
  -2   4  -3  529.15   42.50
  -2   4  -3  528.05   41.90
  -2   4  -3  465.55   38.40
   2   4  -3  580.84   36.30
   2   4  -3  564.74   40.00
   2  -4   3  517.85   38.00
   2  -4   3  601.34   44.70
   2  -4   3  568.14   43.30
   2   4  -3  586.44   45.50
   2   4  -3  507.55   40.10
   2  -4   3  623.24   43.20
   2   4  -3  552.44   40.60
   2   4  -3  547.95   47.10
   2   4  -3  572.04   39.60
   2  -4   3  609.84   44.50
   2  -4   3  518.25   44.60
  -2   4  -2  255.77   22.80
  -2   4  -2  249.38   22.90
  -2   4  -2  236.38   23.80
  -2  -4   2  238.88   20.00
  -2   4  -2  269.87   21.70
  -2   4  -2  284.17   25.50
  -2   4  -2  256.07   22.80
  -2  -4   2  257.37   24.30
  -2  -4   2  268.17   20.70
  -2  -4   2  260.77   21.90
   2  -4   2  272.47   24.00
   2   4  -2  273.77   24.90
   2   4  -2  250.47   22.00
   2   4  -2  267.57   23.30
   2   4  -2  224.68   22.20
   2  -4   2  277.47   21.80
   2   4  -2  251.97   19.70
   2   4  -2  278.97   22.70
   2  -4   2  280.47   24.30
   2  -4   2  277.47   26.30
   2   4  -2  256.57   20.80
   2  -4   2  277.97   24.40
   2  -4   2  261.37   25.00
  -2  -4   1 1397.56   57.09
  -2  -4   1 1380.96   61.39
  -2   4  -1 1461.75   63.09
  -2   4  -1 1425.26   62.69
  -2  -4   1 1442.06   58.09
  -2   4  -1 1386.76   60.99
  -2  -4   1 1408.46   57.09
  -2   4  -1 1397.46   63.69
  -2   4  -1 1437.86   61.39
  -2   4  -1 1397.56   57.99
   2  -4   1 1328.57   63.39
   2   4  -1 1279.57   55.99
   2   4  -1 1293.27   57.59
   2  -4   1 1250.57   60.99
   2  -4   1 1242.48   60.39
   2  -4   1 1286.07   62.39
   2  -4   1 1288.47   57.09
   2  -4   1 1295.07   60.99
   2   4  -1 1302.77   60.29
   2   4  -1 1239.88   56.39
   2   4  -1 1234.08   56.19
  -2  -4   0  759.52   34.70
  -2  -4   0  761.82   36.70
  -2   4   0  768.82   39.70
  -2   4   0  825.72   38.50
  -2   4   0  792.82   37.90
  -2   4   0  794.52   37.70
  -2  -4   0  772.42   31.00
  -2  -4   0  784.62   31.70
   2  -4   0  777.22   37.90
   2  -4   0  764.02   39.80
   2   4   0  772.82   31.60
   2  -4   0  749.53   37.40
   2   4   0  784.52   34.80
   2  -4   0  797.32   38.10
   2   4   0  787.62   30.70
  -2   4   1 1194.18   64.19
  -2  -4  -1 1268.57   62.29
  -2  -4  -1 1276.57   58.99
  -2  -4  -1 1252.07   61.49
  -2   4   1 1351.66   62.39
  -2  -4  -1 1324.27   59.49
  -2   4   1 1301.07   61.89
  -2   4   1 1267.07   63.29
  -2  -4  -1 1324.57   62.49
   2  -4  -1 1428.86   62.39
   2   4   1 1497.45   60.49
   2   4   1 1460.75   62.89
   2   4   1 1423.36   63.09
   2   4   1 1451.15   58.99
   2  -4  -1 1401.56   59.89
   2  -4  -1 1437.86   62.99
   2   4   1 1415.06   57.99
   2  -4  -1 1391.06   62.99
   2  -4  -1 1435.86   66.39
   2  -4  -1 1431.26   65.39
  -2  -4  -2  269.77   23.30
  -2   4   2  291.97   25.20
  -2  -4  -2  288.87   26.30
  -2   4   2  240.78   26.00
  -2   4   2  314.67   27.20
  -2  -4  -2  263.97   23.80
  -2  -4  -2  332.17   28.40
  -2   4   2  281.87   24.10
  -2   4   2  237.88   23.80
  -2  -4  -2  282.57   24.10
   2  -4  -2  217.28   24.40
   2   4   2  303.77   25.90
   2  -4  -2  220.98   23.80
   2   4   2  224.18   21.90
   2  -4  -2  229.88   22.80
   2  -4  -2  258.97   23.90
   2   4   2  265.07   24.10
   2   4   2  219.78   21.40
   2  -4  -2  264.67   23.80
   2   4   2  247.88   25.10
  -2  -4  -3  552.14   42.00
  -2   4   3  546.75   42.70
  -2  -4  -3  562.44   40.80
  -2  -4  -3  555.74   41.00
  -2   4   3  516.55   40.40
  -2  -4  -3  537.55   43.80
  -2   4   3  597.54   46.20
  -2  -4  -3  549.45   46.00
  -2   4   3  593.64   43.10
   2   4   3  487.85   44.70
   2  -4  -3  503.55   40.10
   2   4   3  554.84   41.10
   2  -4  -3  499.55   42.60
   2  -4  -3  484.55   45.10
   2   4   3  522.15   41.50
   2   4   3  508.45   39.70
   2  -4  -3  517.15   41.50
  -2   4   4  443.36   43.80
  -2   4   4  389.26   41.90
  -2  -4  -4  393.36   41.00
  -2  -4  -4  385.26   41.50
  -2  -4  -4  398.56   45.40
  -2  -4  -4  323.87   36.70
  -2   4   4  344.97   37.90
  -2  -4  -4  333.77   38.10
   2  -4  -4  367.66   39.20
   2  -4  -4  277.37   43.20
   2  -4  -4  377.76   52.79
   2   4   4  323.07   37.90
   2  -4  -4  340.37   39.50
   2   4   4  403.96   40.80
  -2  -4  -5  151.88   34.90
  -2   4   5  168.18   35.70
  -2  -4  -5  165.48   38.00
  -2  -4  -5  134.79   37.40
  -2   4   5  156.68   37.00
   2  -4  -5  242.58   46.60
   2  -4  -5  247.38   41.80
   2   4   5  261.97   46.00
   2  -4  -5  218.98   44.90
   2   4   5  282.67   44.00
  -2  -4  -6   56.59   34.70
  -2  -4  -6   92.59   32.10
  -2  -4  -6   78.39   30.80
   2  -4  -6   55.79   38.90
   2  -4  -6   60.29   34.80
   2   4   6   35.60   24.30
   2  -4  -6   33.30   29.30
   2   4   6   81.59   28.60
  -3   4  -6   45.20   31.00
  -3  -4   6   69.59   32.60
  -3   4  -6   65.39   32.70
  -3   4  -6   26.60   26.20
   3   4  -6   75.49   32.70
   3  -4   6   81.59   35.30
   3   4  -6   79.19   43.50
   3  -4   6  107.59   35.30
  -3  -4   5  180.88   36.80
  -3   4  -5   91.59   29.10
  -3   4  -5   90.59   28.60
  -3   4  -5   82.69   32.60
  -3  -4   5   28.60   25.60
   3   4  -5   90.39   28.80
   3  -4   5   89.69   30.10
   3  -4   5   80.99   28.50
   3   4  -5   99.09   34.20
   3   4  -5  100.39   24.40
   3   4  -5  110.19   27.20
  -3   4  -4   21.50   16.40
  -3  -4   4   31.50   19.30
  -3  -4   4   20.30   17.10
  -3   4  -4   30.60   15.80
  -3  -4   4   23.00   16.90
  -3   4  -4   33.10   24.20
  -3   4  -4   20.70   17.40
   3  -4   4   34.20   17.80
   3   4  -4   -4.60   13.30
   3  -4   4   17.90   15.40
   3   4  -4    9.30   15.40
   3   4  -4   26.70   15.60
   3   4  -4   24.20   13.60
   3  -4   4   27.60   19.40
  -3  -4   3  260.27   26.90
  -3  -4   3  255.57   27.90
  -3  -4   3  243.48   27.40
  -3   4  -3  273.57   27.90
  -3   4  -3  209.08   36.60
  -3  -4   3  271.47   26.30
   3   4  -3  245.98   27.50
   3   4  -3  310.77   34.30
   3  -4   3  227.48   26.60
   3  -4   3  288.57   31.70
   3  -4   3  261.57   25.80
   3   4  -3  267.07   22.90
   3   4  -3  273.67   26.70
   3  -4   3  268.87   28.30
   3   4  -3  273.87   27.80
   3   4  -3  243.48   24.10
   3  -4   3  249.68   29.50
   3   4  -3  293.37   31.40
   3  -4   3  259.77   35.70
  -3  -4   2 1984.20   89.19
  -3   4  -2 2034.70   98.79
  -3   4  -2 2051.19   96.99
  -3   4  -2 2044.30   96.89
  -3   4  -2 2009.30   94.39
  -3  -4   2 2024.60   97.29
  -3   4  -2 1910.11   99.19
  -3   4  -2 2078.99   99.69
  -3  -4   2 1944.81   93.19
   3   4  -2 2251.87   96.19
   3  -4   2 2262.87   95.29
   3  -4   2 2218.78   99.29
   3  -4   2 2348.27  102.59
   3   4  -2 2193.38   93.59
   3  -4   2 2265.57   99.29
   3   4  -2 2189.68   89.19
   3  -4   2 2216.48  102.29
   3   4  -2 2321.97   95.19
   3   4  -2 2271.67   97.99
   3  -4   2 2263.07   99.69
   3   4  -2 2215.38   95.79
   3   4  -2 2198.28   98.99
  -3   4  -1 1037.20   55.89
  -3  -4   1  962.50   44.30
  -3   4  -1  952.70   48.20
  -3   4  -1  972.30   45.60
  -3  -4   1  979.20   41.60
  -3  -4   1  990.70   46.20
  -3   4  -1 1000.80   47.40
  -3   4  -1 1036.20   49.00
  -3   4  -1  980.00   45.40
   3  -4   1  899.61   46.80
   3  -4   1  913.11   45.80
   3  -4   1  889.21   49.10
   3  -4   1  907.41   47.10
   3   4  -1  876.21   41.40
   3  -4   1  926.01   48.70
   3   4  -1  838.12   40.30
   3   4  -1  888.11   42.80
   3   4  -1  894.21   40.60
   3   4  -1  873.21   44.60
   3   4  -1  841.82   40.20
  -3  -4   0  213.58   15.60
  -3   4   0  223.88   19.60
  -3   4   0  250.47   18.40
  -3   4   0  239.68   18.30
  -3   4   0  231.58   17.20
   3  -4   0  233.78   18.00
   3  -4   0  228.38   17.40
   3  -4   0  226.18   17.80
   3  -4   0  220.18   20.00
   3  -4   0  217.98   15.20
  -3  -4  -1  898.71   45.60
  -3  -4  -1  863.21   43.60
  -3  -4  -1  859.01   47.20
  -3  -4  -1  867.11   43.40
  -3   4   1  952.30   51.19
  -3  -4  -1  909.31   46.50
  -3   4   1  889.11   42.90
  -3  -4  -1  904.61   43.30
  -3   4   1  946.01   47.60
  -3  -4  -1  898.41   43.20
  -3  -4  -1  896.21   43.10
  -3   4   1  880.51   48.60
  -3   4   1  942.51   47.50
   3  -4  -1  998.90   44.00
   3   4   1 1004.60   51.59
   3   4   1  944.01   40.70
   3  -4  -1 1041.10   48.50
   3   4   1  965.50   41.00
   3  -4  -1  992.20   50.89
   3  -4  -1  985.40   47.90
   3  -4  -1  942.61   50.69
   3  -4  -1  999.10   46.10
  -3  -4  -2 2297.37  102.09
  -3   4   2 2138.09  106.29
  -3  -4  -2 2213.58   98.09
  -3  -4  -2 2262.67   96.59
  -3  -4  -2 2353.36  103.09
  -3  -4  -2 2236.58   98.29
  -3   4   2 2207.78  101.69
  -3   4   2 2200.28   99.19
  -3   4   2 2256.87   98.79
  -3  -4  -2 2302.37  100.09
  -3  -4  -2 2211.88   97.09
  -3   4   2 2280.47  105.29
   3   4   2 2008.40   94.09
   3   4   2 2088.29   98.79
   3  -4  -2 2080.19   90.89
   3   4   2 1972.10   98.19
   3  -4  -2 2030.90   96.69
   3  -4  -2 2027.50  102.09
   3   4   2 2042.40   94.89
   3  -4  -2 1993.00   97.89
   3  -4  -2 2045.80  103.19
   3  -4  -2 2005.70   97.39
  -3   4   3  288.27   31.50
  -3   4   3  278.47   30.40
  -3  -4  -3  286.07   32.00
  -3  -4  -3  250.27   27.80
  -3   4   3  248.08   28.60
  -3  -4  -3  236.98   37.90
  -3  -4  -3  246.18   28.10
  -3  -4  -3  234.28   27.10
  -3   4   3  235.88   36.30
   3  -4  -3  268.67   28.40
   3   4   3  296.07   29.90
   3   4   3  305.47   31.00
   3   4   3  237.58   29.20
   3  -4  -3  281.47   33.50
   3  -4  -3  277.07   32.80
   3   4   3  263.17   27.20
   3  -4  -3  299.27   30.00
  -3  -4  -4   18.70   15.10
  -3  -4  -4    0.60   16.70
  -3  -4  -4    4.50   18.10
  -3   4   4   45.80   21.30
  -3  -4  -4   38.40   16.40
  -3   4   4    3.60   14.70
  -3  -4  -4   39.40   17.30
  -3   4   4   36.60   20.00
   3  -4  -4    7.80   18.40
   3  -4  -4   31.70   15.70
   3  -4  -4   33.20   21.00
   3   4   4   28.20   21.10
   3  -4  -4   71.89   21.50
   3   4   4   31.50   18.50
  -3   4   5   74.89   27.70
  -3  -4  -5   94.19   30.40
  -3  -4  -5   18.20   25.00
  -3  -4  -5   72.59   30.40
  -3  -4  -5   43.30   24.90
  -3   4   5   68.49   26.40
   3  -4  -5  129.69   41.40
   3   4   5   70.99   25.30
   3   4   5   86.69   30.30
   3  -4  -5  115.09   29.90
   3  -4  -5   85.79   32.60
  -3  -4  -6   90.49   33.00
  -3   4   6  113.79   35.80
   3  -4  -6   61.99   36.00
   3   4   6   91.49   35.00
   3  -4  -6  117.19   40.70
   3   4   6   62.69   31.50
  -4   4  -6   -2.30   23.60
  -4   4  -6   -5.90   26.90
  -4   4  -6   42.20   29.80
  -4  -4   6   -5.80   28.90
  -4  -4   6   18.60   25.80
   4   4  -6   56.09   31.50
   4   4  -6  -39.60   27.90
   4  -4   6   11.90   27.70
   4   4  -6   55.89   34.10
   4  -4   6   77.69   31.10
  -4   4  -5  179.28   43.20
  -4  -4   5  146.09   37.20
  -4  -4   5  137.99   33.40
  -4   4  -5  102.29   29.90
   4   4  -5  148.79   45.00
   4   4  -5  171.98   34.90
   4  -4   5  151.08   35.10
   4  -4   5  187.78   41.00
   4   4  -5  123.99   33.00
   4   4  -5  174.88   40.00
  -4   4  -4  398.06   39.70
  -4  -4   4  423.56   38.10
  -4   4  -4  441.96   40.00
  -4   4  -4  398.96   48.30
  -4  -4   4  343.07   39.70
  -4  -4   4  422.66   43.00
   4  -4   4  408.66   43.60
   4   4  -4  392.76   43.80
   4   4  -4  361.86   39.50
   4  -4   4  341.17   41.00
   4   4  -4  312.47   29.50
   4   4  -4  338.47   36.90
  -4   4  -3    6.40   12.30
  -4   4  -3   -1.70    8.80
  -4  -4   3   21.20   14.30
  -4   4  -3    6.10   10.50
  -4  -4   3   -4.50    9.30
  -4   4  -3   -3.90    9.60
  -4  -4   3   21.00   12.50
  -4   4  -3   -7.50    7.50
   4   4  -3  -17.00    8.60
   4   4  -3    6.80    9.10
   4  -4   3    1.70   10.90
   4  -4   3    3.80    9.00
   4   4  -3    0.90   11.20
   4  -4   3   12.00   12.30
   4   4  -3   -0.70   10.90
   4  -4   3   16.70   11.90
   4   4  -3   11.90   10.10
   4  -4   3   16.80   12.70
   4   4  -3   13.20   10.70
   4  -4   3   16.70   13.30
  -4   4  -2  275.57   25.30
  -4   4  -2  375.06   30.50
  -4  -4   2  325.27   25.40
  -4   4  -2  306.07   28.70
  -4  -4   2  291.57   19.30
  -4   4  -2  312.27   25.90
  -4   4  -2  312.57   28.30
  -4   4  -2  327.77   27.00
  -4  -4   2  306.27   26.00
   4   4  -2  284.37   26.40
   4  -4   2  294.87   26.40
   4  -4   2  298.57   28.60
   4   4  -2  286.87   23.60
   4   4  -2  312.87   25.50
   4  -4   2  303.37   24.90
   4  -4   2  280.77   28.50
   4  -4   2  275.77   26.00
   4  -4   2  275.17   25.90
   4   4  -2  292.37   18.30
   4   4  -2  307.27   22.70
  -4   4  -1 1741.93   75.19
  -4   4  -1 1726.43   76.29
  -4   4  -1 1743.93   73.99
  -4  -4   1 1678.03   65.99
  -4   4  -1 1695.73   71.19
  -4  -4   1 1718.23   66.89
  -4   4  -1 1619.24   75.29
  -4  -4   1 1732.93   71.99
  -4   4  -1 1705.93   78.69
   4  -4   1 1486.95   76.39
   4  -4   1 1531.65   73.69
   4  -4   1 1625.74   76.39
   4   4  -1 1481.35   65.19
   4   4  -1 1510.95   66.39
   4  -4   1 1551.94   73.79
   4   4  -1 1521.35   65.29
   4   4  -1 1541.75   70.29
   4  -4   1 1603.84   71.29
   4   4  -1 1529.05   65.29
  -4   4   0  993.20   51.99
  -4  -4   0  991.60   47.40
  -4   4   0 1052.79   49.70
  -4  -4   0  993.00   38.00
  -4   4   0  989.40   49.30
  -4  -4   0  976.60   37.80
  -4  -4   0  990.60   37.80
  -4   4   0  915.91   46.70
   4  -4   0 1014.40   52.39
   4  -4   0  953.00   43.60
   4  -4   0  996.70   48.00
   4  -4   0 1029.80   49.30
  -4  -4  -1 1541.25   68.79
  -4  -4  -1 1498.05   68.49
  -4  -4  -1 1508.15   74.39
  -4  -4  -1 1518.35   71.09
  -4  -4  -1 1561.74   69.09
  -4  -4  -1 1579.44   72.09
  -4   4   1 1523.25   77.69
  -4   4   1 1595.24   68.39
  -4   4   1 1539.25   73.79
  -4  -4  -1 1506.35   69.39
  -4  -4  -1 1484.05   67.99
  -4   4   1 1636.54   74.69
  -4   4   1 1548.95   77.29
   4   4   1 1722.43   64.39
   4   4   1 1717.13   75.39
   4  -4  -1 1758.52   71.49
   4  -4  -1 1723.63   74.69
   4   4   1 1755.42   64.59
   4  -4  -1 1737.23   69.19
   4  -4  -1 1721.03   74.79
   4  -4  -1 1704.63   79.09
  -4  -4  -2  317.17   26.50
  -4   4   2  299.27   30.00
  -4  -4  -2  310.27   28.80
  -4  -4  -2  286.47   24.20
  -4  -4  -2  293.47   25.60
  -4  -4  -2  316.77   27.20
  -4   4   2  272.87   28.20
  -4   4   2  332.07   28.40
  -4   4   2  323.67   27.80
  -4  -4  -2  380.96   27.20
  -4   4   2  312.07   26.30
  -4  -4  -2  357.76   30.10
   4  -4  -2  322.07   31.20
   4  -4  -2  322.67   27.30
   4  -4  -2  335.07   31.60
   4   4   2  286.67   23.80
   4   4   2  327.47   28.80
   4  -4  -2  297.57   27.00
   4  -4  -2  309.47   21.70
   4   4   2  298.27   27.40
   4  -4  -2  257.47   24.20
   4   4   2  301.87   23.50
  -4  -4  -3   31.80   14.20
  -4  -4  -3   25.10   15.00
  -4   4   3    6.30    9.50
  -4   4   3   11.60   10.40
  -4   4   3   12.00   10.00
  -4  -4  -3    6.40   11.50
  -4   4   3   13.00   12.10
  -4  -4  -3    8.60   12.10
  -4  -4  -3   17.90   10.90
  -4  -4  -3   20.40   14.80
  -4  -4  -3   24.70   13.30
  -4   4   3   11.80   14.10
   4   4   3   -3.90    9.40
   4  -4  -3    3.50   10.70
   4   4   3   -0.80    9.80
   4  -4  -3    8.00   10.60
   4  -4  -3   -8.90   10.90
   4  -4  -3    6.30    9.60
   4   4   3    5.40    9.80
   4  -4  -3   -1.00   11.70
   4   4   3   -4.70   10.60
  -4  -4  -4  366.76   44.30
  -4  -4  -4  329.27   47.20
  -4   4   4  375.56   40.90
  -4   4   4  349.17   39.60
  -4  -4  -4  348.37   40.20
  -4  -4  -4  324.87   35.90
  -4  -4  -4  366.06   39.30
  -4   4   4  381.36   40.20
   4  -4  -4  410.86   34.80
   4  -4  -4  355.46   51.89
   4  -4  -4  466.55   49.50
   4   4   4  498.85   46.90
   4   4   4  445.36   42.00
  -4  -4  -5  149.99   37.20
  -4  -4  -5  179.38   42.30
  -4   4   5  154.48   35.20
  -4   4   5  211.98   40.90
  -4  -4  -5  154.08   34.00
   4   4   5  135.19   34.00
   4  -4  -5  151.98   27.90
   4   4   5  156.38   33.00
   4  -4  -5  113.29   31.10
   4  -4  -5  163.18   39.90
  -4  -4  -6   10.60   19.40
  -4  -4  -6   26.20   25.40
  -4   4   6    8.20   22.70
  -4  -4  -6   21.00   26.10
   4   4   6   20.70   27.70
   4  -4  -6   65.39   34.70
   4   4   6   64.29   29.40
   4  -4  -6   18.10   29.60
  -5   4  -5   43.30   22.90
  -5  -4   5    1.60   19.30
  -5  -4   5   37.60   20.90
  -5   4  -5  -15.40   18.30
   5   4  -5   19.90   26.10
   5   4  -5   25.50   16.90
   5  -4   5   52.79   24.40
   5  -4   5   29.00   23.60
   5   4  -5   55.79   25.30
   5   4  -5  -29.80   23.80
  -5  -4   4   73.29   24.70
  -5   4  -4   93.59   22.80
  -5  -4   4   72.29   25.20
  -5   4  -4  118.79   29.00
  -5   4  -4   60.19   21.50
  -5   4  -4  137.69   36.50
   5  -4   4   94.19   26.30
   5  -4   4   79.89   23.90
   5   4  -4   88.29   25.40
   5  -4   4   81.19   24.70
   5   4  -4   51.19   19.60
   5   4  -4  107.69   17.50
  -5  -4   3  253.67   34.20
  -5  -4   3  240.78   31.90
  -5  -4   3  230.88   26.80
  -5   4  -3  258.27   34.70
  -5   4  -3  215.98   26.40
  -5   4  -3  261.57   31.50
  -5   4  -3  211.58   26.10
  -5   4  -3  225.98   34.90
   5  -4   3  336.47   33.20
   5   4  -3  286.37   19.90
   5   4  -3  289.67   32.50
   5  -4   3  293.27   40.70
   5   4  -3  295.57   29.20
   5  -4   3  286.27   30.80
   5  -4   3  274.97   29.40
   5   4  -3  314.17   28.70
   5  -4   3  261.57   36.80
   5   4  -3  239.68   24.90
   5   4  -3  330.27   35.20
   5  -4   3  294.17   29.20
  -5   4  -2 2465.25  110.59
  -5   4  -2 2509.25  113.09
  -5   4  -2 2631.84  114.09
  -5   4  -2 2593.04  118.69
  -5  -4   2 2481.75  111.89
  -5  -4   2 2501.35  111.29
  -5   4  -2 2547.05  116.99
  -5  -4   2 2513.25  107.59
  -5  -4   2 2522.45  109.09
  -5   4  -2 2625.04  118.29
  -5  -4   2 2451.15   98.59
   5   4  -2 2366.56  109.29
   5  -4   2 2571.84  112.59
   5  -4   2 2649.53  115.79
   5   4  -2 2455.25   97.79
   5  -4   2 2444.06  117.59
   5  -4   2 2477.35  117.89
   5  -4   2 2489.75  113.69
   5   4  -2 2507.45  106.59
   5   4  -2 2408.56  105.79
   5  -4   2 2453.35  111.69
   5   4  -2 2454.15  111.39
  -5  -4   1  815.72   36.50
  -5   4  -1  773.32   47.40
  -5  -4   1  768.22   40.20
  -5  -4   1  802.82   35.30
  -5   4  -1  788.42   39.60
  -5   4  -1  766.52   45.30
  -5  -4   1  793.32   38.00
  -5   4  -1  772.12   44.90
  -5   4  -1  809.42   44.50
  -5   4  -1  780.12   43.90
   5  -4   1  828.32   47.20
   5  -4   1  760.52   43.50
   5  -4   1  825.12   48.20
   5   4  -1  759.62   35.00
   5   4  -1  768.52   39.60
   5  -4   1  741.03   43.70
   5  -4   1  815.02   40.90
  -5  -4   0  406.76   18.40
  -5   4   0  408.96   27.60
  -5   4   0  463.95   31.60
  -5  -4   0  384.26   26.90
  -5   4   0  449.66   29.00
  -5   4   0  361.06   25.30
   5  -4   0  395.96   27.40
   5  -4   0  394.86   21.70
   5  -4   0  398.96   26.40
   5   4   0  414.16   18.20
   5  -4   0  400.46   30.30
   5  -4   0  398.06   26.50
  -5  -4  -1  825.82   42.70
  -5   4   1  800.02   48.30
  -5   4   1  750.02   38.10
  -5  -4  -1  808.82   39.80
  -5  -4  -1  795.12   40.40
  -5  -4  -1  812.72   39.60
  -5   4   1  799.62   44.80
  -5   4   1  783.72   53.39
  -5  -4  -1  751.72   41.20
  -5  -4  -1  800.62   39.40
  -5  -4  -1  814.82   46.00
  -5   4   1  853.41   45.50
   5  -4  -1  804.42   48.10
   5   4   1  772.12   45.00
   5  -4  -1  816.12   39.10
   5  -4  -1  786.02   43.80
   5  -4  -1  846.32   44.90
   5  -4  -1  788.72   39.80
  -5  -4  -2 2403.96  112.09
  -5  -4  -2 2485.35  117.09
  -5  -4  -2 2335.47  111.49
  -5   4   2 2457.55  111.09
  -5   4   2 2452.65  114.09
  -5   4   2 2470.05  118.79
  -5  -4  -2 2495.75  112.99
  -5  -4  -2 2390.66  109.49
  -5   4   2 2450.55  119.89
  -5  -4  -2 2468.35  110.89
   5   4   2 2590.54  116.69
   5   4   2 2486.35  106.79
   5  -4  -2 2669.93  103.69
   5  -4  -2 2518.75  119.89
   5  -4  -2 2694.83  111.99
   5  -4  -2 2745.13  115.49
   5  -4  -2 2506.35  119.79
   5   4   2 2647.24  108.59
   5  -4  -2 2524.25  114.59
  -5   4   3  213.28   35.70
  -5  -4  -3  243.68   36.10
  -5  -4  -3  259.87   29.10
  -5  -4  -3  256.47   37.20
  -5   4   3  266.07   29.30
  -5  -4  -3  292.37   30.00
  -5  -4  -3  265.17   31.80
  -5  -4  -3  257.87   27.90
  -5  -4  -3  284.77   29.10
  -5   4   3  249.38   35.80
  -5   4   3  284.07   30.80
  -5   4   3  249.18   28.60
   5   4   3  268.77   29.10
   5  -4  -3  220.18   26.70
   5  -4  -3  239.98   21.30
   5  -4  -3  246.98   37.80
   5  -4  -3  235.88   28.10
   5   4   3  254.97   26.60
   5  -4  -3  241.78   28.70
   5  -4  -3  216.78   34.90
   5   4   3  229.48   26.50
  -5  -4  -4  135.89   28.70
  -5  -4  -4  112.79   28.90
  -5   4   4  102.59   25.60
  -5   4   4   82.29   25.10
  -5  -4  -4  133.99   28.40
  -5   4   4   91.69   24.10
  -5  -4  -4   81.39   24.80
  -5  -4  -4  139.49   31.90
   5  -4  -4   66.29   21.40
   5  -4  -4   81.59   28.30
   5  -4  -4   75.59   16.40
   5   4   4   60.39   21.50
   5  -4  -4   77.59   27.50
   5   4   4   33.50   18.50
   5  -4  -4  100.29   19.20
  -5  -4  -5   45.70   22.80
  -5   4   5   43.00   23.80
  -5  -4  -5   39.60   24.60
  -5   4   5  -25.00   19.60
  -5  -4  -5   44.40   26.80
  -5  -4  -5   21.10   19.00
  -5   4   5   -5.10   20.30
   5  -4  -5    1.80   21.90
   5   4   5   29.80   20.30
   5  -4  -5   29.00   19.10
   5  -4  -5    3.50   20.50
   5   4   5   25.80   21.70
  -6   4  -5  241.28   44.30
  -6  -4   5  239.68   40.70
  -6   4  -5  152.88   41.80
  -6  -4   5  177.48   37.50
   6   4  -5  302.47   53.89
   6   4  -5  166.58   23.00
   6  -4   5  188.68   39.30
   6   4  -5  148.19   32.10
   6  -4   5  211.48   42.10
  -6  -4   4  167.28   32.70
  -6   4  -4  164.48   34.90
  -6   4  -4  189.88   35.70
  -6  -4   4  177.68   32.20
  -6   4  -4  200.78   34.30
   6  -4   4  174.48   36.00
   6   4  -4  249.97   35.50
   6  -4   4  242.58   38.30
   6  -4   4  225.68   37.90
   6   4  -4  186.78   35.50
   6  -4   4  201.48   35.80
  -6   4  -3   92.49   23.90
  -6   4  -3   81.99   22.10
  -6  -4   3   78.99   19.00
  -6  -4   3   63.19   17.80
  -6   4  -3   96.39   21.00
  -6  -4   3   48.30   18.10
  -6   4  -3   61.59   17.50
   6  -4   3   68.69   22.90
   6   4  -3   47.20   13.80
   6  -4   3   52.49   18.30
   6  -4   3   35.70   19.30
   6   4  -3   83.59   21.40
   6   4  -3   46.00   17.70
   6  -4   3   86.89   23.40
   6   4  -3   59.89   23.50
   6  -4   3   44.70   16.10
   6   4  -3   55.69    8.50
   6  -4   3   74.79   18.80
  -6  -4   2  846.52   47.40
  -6  -4   2  815.92   48.80
  -6   4  -2  907.31   53.69
  -6   4  -2  821.72   48.70
  -6  -4   2  873.41   49.60
  -6   4  -2  878.91   54.89
  -6  -4   2  878.41   51.99
  -6   4  -2  831.72   54.19
  -6   4  -2  798.12   54.09
  -6   4  -2  906.91   52.49
  -6  -4   2  819.32   45.60
   6  -4   2  874.51   49.80
   6   4  -2  847.12   45.10
   6   4  -2  866.71   45.20
   6  -4   2  763.52   49.90
   6  -4   2  930.41   56.99
   6   4  -2  853.61   47.70
   6  -4   2  861.41   52.79
   6  -4   2  873.91   56.39
   6   4  -2  843.62   49.30
  -6  -4   1  249.97   19.80
  -6   4  -1  268.67   24.20
  -6   4  -1  300.37   25.00
  -6  -4   1  280.17   17.50
  -6  -4   1  293.27   19.20
  -6   4  -1  301.07   26.30
  -6   4  -1  275.77   19.70
  -6   4  -1  260.87   24.70
  -6   4  -1  253.87   25.90
  -6  -4   1  294.47   18.10
  -6  -4   1  279.47   16.50
  -6   4   0 1301.17   61.89
  -6  -4   0 1342.37   65.09
  -6  -4   0 1303.47   54.79
  -6   4   0 1300.67   73.89
  -6  -4   0 1306.57   53.19
  -6  -4   0 1351.46   56.89
  -6   4   0 1307.57   64.29
  -6   4   0 1299.77   64.69
  -6  -4   0 1226.58   54.49
   6  -4   0 1240.38   61.69
   6   4   0 1292.57   53.19
   6   4   0 1287.67   51.59
   6  -4   0 1302.87   54.79
   6  -4   0 1342.57   63.19
   6  -4   0 1320.17   63.99
   6  -4   0 1376.16   68.89
  -6  -4  -1  444.96   25.30
  -6   4   1  440.56   30.60
  -6  -4  -1  451.15   27.30
  -6  -4  -1  418.86   24.40
  -6  -4  -1  464.75   33.00
  -6   4   1  400.36   29.50
  -6  -4  -1  422.26   26.10
  -6   4   1  478.85   35.60
  -6   4   1  459.75   34.20
  -6   4   1  397.36   23.80
   6   4   1  305.27   23.30
   6   4   1  284.27   27.60
   6  -4  -1  317.87   27.30
   6  -4  -1  326.37   23.20
  -6  -4  -2  903.81   52.19
  -6  -4  -2  846.02   53.49
  -6  -4  -2  860.41   49.80
  -6  -4  -2  847.62   49.00
  -6   4   2  928.11   54.19
  -6   4   2  937.11   54.19
  -6   4   2  803.72   55.59
  -6   4   2  854.71   56.99
  -6  -4  -2  816.72   49.99
  -6  -4  -2  860.81   51.29
  -6  -4  -2  852.11   55.69
   6  -4  -2  915.51   52.99
   6   4   2  855.11   54.19
   6  -4  -2  931.91   58.29
   6  -4  -2  837.22   52.19
   6   4   2  906.71   46.60
   6  -4  -2  902.71   49.20
   6  -4  -2  952.40   42.60
  -6   4   3   61.59   18.20
  -6  -4  -3   76.09   21.10
  -6   4   3   42.80   17.40
  -6  -4  -3   62.39   18.20
  -6   4   3   62.09   17.60
  -6  -4  -3   64.29   18.60
  -6  -4  -3   84.59   23.50
  -6   4   3   43.40   18.30
  -6  -4  -3   57.59   17.80
  -6  -4  -3   74.19   17.80
  -6  -4  -3  119.39   27.00
   6  -4  -3   92.39   14.10
   6   4   3   91.69   19.00
   6  -4  -3   80.19   23.20
   6  -4  -3   74.59   24.20
   6  -4  -3  100.99   22.30
   6   4   3   60.29   17.10
   6  -4  -3   67.79   19.00
   6  -4  -3   79.19   20.10
  -6  -4  -4  211.38   38.40
  -6  -4  -4  185.58   36.90
  -6   4   4  217.98   37.80
  -6   4   4  195.08   34.20
  -6  -4  -4  224.78   35.90
  -6   4   4  157.78   30.30
  -6  -4  -4  183.98   31.60
  -6  -4  -4  205.08   34.10
   6   4   4  204.98   33.00
   6   4   4  196.08   33.80
   6  -4  -4  233.98   40.10
   6  -4  -4  244.88   42.80
   6  -4  -4  201.28   21.80
   6  -4  -4  141.79   22.00
   6  -4  -4  174.08   32.30
  -6  -4  -5  281.47   48.80
  -6  -4  -5  237.38   41.20
  -6  -4  -5  151.28   39.00
  -6   4   5  176.18   36.90
  -6   4   5  233.98   42.90
  -6   4   5  268.07   44.80
   6  -4  -5  194.78   42.60
   6  -4  -5  209.68   29.20
   6  -4  -5  218.88   27.90
   6  -4  -5  234.08   46.70
   6   4   5  248.28   44.50
   6   4   5  198.38   37.10
  -7   4  -5   -1.90   23.30
  -7  -4   5   42.20   25.10
  -7  -4   5   26.80   24.50
  -7   4  -5   48.60   22.60
  -7   4  -5   30.30   24.80
   7   4  -5   -4.40   24.90
   7  -4   5   12.90   21.10
   7   4  -5    1.20   19.20
   7  -4   5   -3.10   21.50
  -7   4  -4   48.50   21.30
  -7   4  -4   64.89   24.00
  -7  -4   4   71.19   21.30
  -7  -4   4   35.70   19.10
  -7   4  -4   54.19   22.00
   7  -4   4   98.59   28.70
   7   4  -4   50.89   23.80
   7  -4   4   29.80   19.40
   7   4  -4   40.50    7.40
   7  -4   4   56.39   20.80
   7   4  -4   25.10   22.30
   7  -4   4   10.80   18.20
  -7   4  -3  366.46   39.10
  -7  -4   3  319.37   32.70
  -7   4  -3  339.17   34.40
  -7  -4   3  382.56   34.40
  -7   4  -3  350.46   37.30
  -7  -4   3  336.47   35.80
  -7   4  -3  355.06   33.60
  -7   4  -3  296.97   35.50
   7  -4   3  371.66   35.70
   7  -4   3  395.26   37.70
   7   4  -3  432.66   39.30
   7  -4   3  433.96   44.30
  -7   4  -2  906.21   57.29
  -7  -4   2  798.82   49.40
  -7   4  -2  939.01   59.09
  -7   4  -2  893.21   56.79
  -7  -4   2  807.62   46.20
  -7   4  -2  846.02   54.59
  -7   4  -2  810.62   48.70
  -7   4  -2  813.92   52.39
  -7  -4   2  873.61   49.99
  -7  -4   2  946.21   56.79
  -7  -4   2  808.02   48.00
   7  -4   2  942.91   53.99
   7   4  -2  944.31   51.29
   7  -4   2  905.61   55.19
   7   4  -2  908.71   49.00
   7   4  -2  860.41   45.80
   7  -4   2  924.71   59.79
   7  -4   2  884.21   58.39
   7  -4   2  916.41   51.49
  -7   4  -1  195.48   16.10
  -7  -4   1  187.88   15.90
  -7  -4   1  163.08   14.00
  -7   4  -1  200.68   22.20
  -7   4  -1  207.08   23.70
  -7  -4   1  192.38   15.10
  -7   4  -1  174.98   25.10
  -7   4  -1  199.68   23.00
  -7  -4   1  194.28   16.70
  -7   4  -1  212.98   21.60
  -7  -4   1  187.38   13.30
   7  -4   1  204.58   28.30
   7  -4   1  177.48   20.40
   7   4  -1  166.28   12.80
   7   4  -1  137.79   14.30
   7  -4   1  175.18   16.40
   7  -4   1  199.68   23.00
   7  -4   1  189.18   19.10
  -7   4   0   78.29   16.30
  -7  -4   0   56.79    8.10
  -7   4   0   62.49   13.00
  -7   4   0   48.50   12.80
  -7  -4   0   34.00    6.70
  -7   4   0   37.60   13.10
  -7  -4   0   47.80    8.70
  -7  -4   0   60.79    9.50
  -7  -4   0   48.00   13.90
   7  -4   0   59.89   13.20
   7  -4   0   80.29   15.60
   7  -4   0   56.29   15.50
   7   4   0   46.30    6.50
   7  -4   0   52.49    7.80
   7   4   0   49.99    8.00
   7  -4   0   55.89   13.00
  -7   4   1  171.38   15.50
  -7   4   1  186.68   28.10
  -7  -4  -1  167.88   15.50
  -7   4   1  164.28   25.80
  -7  -4  -1  186.78   28.60
  -7  -4  -1  171.88   17.30
  -7  -4  -1  171.58   16.40
  -7   4   1  176.58   24.30
  -7  -4  -1  225.58   20.50
  -7   4   1  160.68   19.40
   7  -4  -1  171.58   20.50
   7  -4  -1  171.38   18.80
   7  -4  -1  162.88   14.40
   7   4   1  209.98   17.40
   7  -4  -1  199.68   23.70
   7  -4  -1  188.58   16.50
   7   4   1  179.98   15.30
  -7  -4  -2  943.51   59.29
  -7   4   2  898.91   60.29
  -7   4   2  975.30   56.19
  -7  -4  -2  917.81   53.39
  -7  -4  -2  950.80   52.19
  -7  -4  -2  953.50   56.79
  -7   4   2  935.81   55.79
  -7   4   2  898.81   60.09
  -7  -4  -2  872.51   52.39
  -7  -4  -2  828.92   49.40
   7   4   2  849.91   55.19
   7  -4  -2  830.62   57.89
   7  -4  -2  851.51   52.99
   7  -4  -2  836.62   41.40
   7   4   2  919.01   46.10
   7  -4  -2  869.51   53.59
   7  -4  -2  870.51   49.10
  -7  -4  -3  343.57   34.10
  -7  -4  -3  348.47   38.40
  -7  -4  -3  431.66   37.60
  -7   4   3  430.36   42.90
  -7   4   3  381.06   37.40
  -7  -4  -3  404.46   41.10
  -7  -4  -3  402.66   35.10
  -7   4   3  450.15   36.60
  -7  -4  -3  319.77   35.00
  -7   4   3  389.66   38.20
  -7  -4  -3  414.96   38.10
   7  -4  -3  339.17   34.50
   7   4   3  353.26   30.90
   7   4   3  411.76   38.10
   7  -4  -3  331.97   32.30
   7   4   3  367.26   33.00
   7  -4  -3  355.96   40.80
   7  -4  -3  364.06   23.80
   7  -4  -3  359.96   36.90
  -7  -4  -4   59.29   22.90
  -7  -4  -4   62.49   21.50
  -7   4   4   53.19   21.50
  -7  -4  -4   63.99   21.60
  -7  -4  -4   75.69   25.10
  -7   4   4   85.19   23.80
  -7  -4  -4   89.59   26.40
   7  -4  -4   65.99   14.00
   7   4   4   86.19   25.50
   7   4   4   76.69   22.70
   7  -4  -4   47.40   21.10
   7  -4  -4   45.50   11.70
   7  -4  -4   66.89   26.30
   7  -4  -4   33.30   23.30
  -7  -4  -5   59.19   25.70
  -7  -4  -5   29.20   22.30
  -7  -4  -5   66.09   28.10
  -7   4   5   11.80   19.40
  -7  -4  -5   27.40   23.30
  -7   4   5   45.10   23.80
  -7   4   5   31.70   25.00
   7  -4  -5   42.80   29.40
   7  -4  -5   50.29   17.00
   7   4   5   32.80   25.30
   7   4   5   39.90   24.30
   7  -4  -5   37.80   24.70
   7  -4  -5   18.20   13.50
  -8   4  -5   63.29   28.60
  -8   4  -5   73.89   31.50
  -8  -4   5   42.10   26.20
  -8  -4   5   57.79   30.30
  -8   4  -5   99.29   32.70
   8  -4   5   85.59   31.10
   8  -4   5  124.69   33.70
   8   4  -5  105.79   30.00
   8   4  -5   83.19   29.40
  -8  -4   4  135.89   28.10
  -8   4  -4   81.89   27.80
  -8   4  -4   93.59   30.00
  -8   4  -4   99.49   30.70
   8   4  -4  155.68   35.00
   8  -4   4   43.90   20.50
   8  -4   4   69.79   24.90
   8  -4   4   66.09   27.10
  -8   4  -3   61.39   18.70
  -8   4  -3   52.69   19.70
  -8  -4   3   71.89   20.70
  -8   4  -3   70.59   23.30
  -8  -4   3   90.89   22.90
  -8  -4   3   76.09   20.60
  -8  -4   3   42.70   14.50
  -8   4  -3   32.30   19.00
  -8   4  -3   61.39   17.80
   8  -4   3   61.99   21.80
   8   4  -3   50.69   17.50
   8   4  -3   58.39   15.30
   8  -4   3   70.69   20.50
   8  -4   3  100.49   25.70
   8   4  -3   74.79   21.70
  -8  -4   2   40.40   13.00
  -8   4  -2   21.90   10.20
  -8  -4   2   45.50   11.40
  -8   4  -2   34.60   15.60
  -8   4  -2   29.40   14.20
  -8   4  -2    5.60   10.10
  -8  -4   2   13.40   12.70
  -8   4  -2   30.20   15.40
  -8  -4   2   24.90   11.60
  -8   4  -2   29.60   15.80
  -8  -4   2   23.10   11.40
   8  -4   2   40.00   17.70
   8  -4   2   49.60   16.60
   8   4  -2   28.80   10.50
   8   4  -2   30.70    9.00
   8  -4   2   24.30   13.80
   8   4  -2   48.30   13.50
   8  -4   2   47.50   13.70
   8  -4   2   50.09   14.20
  -8   4  -1  526.95   30.10
  -8   4  -1  565.74   42.20
  -8  -4   1  557.94   28.90
  -8  -4   1  574.64   31.10
  -8  -4   1  563.34   32.50
  -8  -4   1  557.94   30.60
  -8   4  -1  563.34   39.10
  -8  -4   1  552.94   31.20
  -8   4  -1  493.65   38.40
  -8   4  -1  564.74   41.00
  -8  -4   1  565.54   28.20
  -8   4  -1  554.34   42.50
   8  -4   1  616.94   43.90
   8  -4   1  569.34   31.50
   8   4  -1  580.84   29.10
   8  -4   1  610.84   38.70
   8  -4   1  597.64   39.90
  -8   4   0  638.84   38.90
  -8  -4   0  615.94   31.90
  -8  -4   0  667.33   32.40
  -8  -4   0  691.03   49.99
  -8  -4   0  644.94   32.00
  -8  -4   0  631.54   33.60
  -8   4   0  624.84   41.40
  -8   4   0  679.23   43.30
  -8   4   0  597.54   44.00
   8  -4   0  699.73   41.30
   8  -4   0  618.74   39.00
   8  -4   0  676.43   46.00
   8  -4   0  665.43   41.90
   8  -4   0  657.23   29.00
   8   4   0  625.94   32.60
   8   4   0  696.63   31.00
  -8  -4  -1  642.64   42.60
  -8   4   1  578.34   32.20
  -8   4   1  560.54   42.90
  -8   4   1  554.74   43.40
  -8  -4  -1  571.04   34.20
  -8  -4  -1  570.74   42.70
  -8   4   1  657.23   41.50
  -8  -4  -1  571.04   36.70
  -8  -4  -1  631.94   33.90
  -8  -4  -1  595.14   35.30
  -8   4   1  586.74   40.50
   8  -4  -1  535.25   32.60
   8   4   1  555.24   33.70
   8  -4  -1  565.64   38.70
   8  -4  -1  563.74   29.70
   8  -4  -1  531.75   36.70
   8  -4  -1  559.44   42.90
   8   4   1  569.54   32.30
  -8   4   2   18.70   13.40
  -8  -4  -2   34.90   17.40
  -8  -4  -2   13.90   12.20
  -8   4   2   19.30   14.60
  -8   4   2   28.10   19.10
  -8  -4  -2   29.20   11.50
  -8  -4  -2   37.40   13.30
  -8  -4  -2   32.70   13.20
   8   4   2   24.10   13.90
   8  -4  -2   29.40    7.80
   8   4   2   28.60    8.40
   8  -4  -2   38.90   11.70
   8   4   2   24.00    8.70
   8  -4  -2   10.40   13.40
   8  -4  -2   23.70   12.60
   8  -4  -2   20.10   12.70
  -8  -4  -3   87.69   22.40
  -8   4   3   98.79   27.80
  -8  -4  -3   87.89   22.30
  -8  -4  -3   61.39   20.80
  -8  -4  -3   97.19   21.40
  -8   4   3   49.90   20.00
  -8  -4  -3   68.39   22.00
  -8  -4  -3   79.09   25.10
  -8  -4  -3   68.29   19.50
  -8   4   3  102.59   23.20
   8  -4  -3   40.50   20.00
   8   4   3   83.99   18.30
   8  -4  -3   48.30    9.00
   8  -4  -3   37.10   14.60
   8  -4  -3   41.40   17.90
   8  -4  -3   44.80   17.50
  -8   4   4   77.19   24.60
  -8   4   4   89.09   25.40
  -8  -4  -4   83.49   22.30
  -8  -4  -4   88.19   26.90
  -8  -4  -4  100.89   31.50
  -8  -4  -4   66.69   22.80
  -8  -4  -4  135.69   31.70
  -8   4   4   78.89   25.80
   8  -4  -4  108.49   32.90
   8  -4  -4   93.29   26.70
   8  -4  -4  120.79   14.00
   8   4   4   93.89   24.30
   8  -4  -4   96.69   13.10
   8   4   4  167.28   33.10
  -8  -4  -5   99.59   35.60
  -8  -4  -5  100.69   31.60
  -8   4   5   -6.60   28.30
  -8   4   5  163.28   36.00
  -8   4   5   82.79   26.20
  -8  -4  -5   88.49   27.70
   8   4   5   74.29   25.60
   8  -4  -5   94.19   32.50
   8  -4  -5   17.40   35.30
   8   4   5   77.39   28.60
   8  -4  -5   62.59   14.70
  -9   4  -5    2.60   21.60
  -9   4  -5   16.80   25.60
  -9   4  -5  -10.20   20.90
  -9   4  -5   13.20   23.00
  -9  -4   5  -26.80   17.70
  -9  -4   5   -1.40   21.00
   9   4  -5   12.50   30.20
   9  -4   5  -11.20   23.00
   9  -4   5   -4.70   21.70
   9   4  -5  -20.20   19.80
  -9   4  -4    6.00   18.50
  -9   4  -4   -5.00   15.40
  -9  -4   4   -6.90   14.60
  -9  -4   4   24.80   18.20
   9  -4   4    8.90   16.60
   9   4  -4    0.00   14.30
   9  -4   4  -10.10   16.80
   9  -4   4    7.20   18.40
   9  -4   4    3.50   18.60
  -9   4  -3  372.26   39.10
  -9  -4   3  431.36   35.30
  -9  -4   3  405.26   38.40
  -9   4  -3  453.45   44.30
  -9   4  -3  405.86   37.50
  -9   4  -3  439.36   45.10
  -9  -4   3  448.16   38.90
  -9   4  -3  369.46   42.70
  -9  -4   3  450.05   37.80
   9  -4   3  395.66   43.60
   9   4  -3  314.47   38.60
   9  -4   3  383.96   39.10
   9   4  -3  350.26   37.30
   9   4  -3  352.86   32.10
   9  -4   3  381.46   38.00
  -9  -4   2  207.38   32.40
  -9   4  -2  254.37   30.20
  -9   4  -2  241.08   23.10
  -9  -4   2  259.87   24.40
  -9  -4   2  252.77   24.10
  -9   4  -2  265.47   37.60
  -9   4  -2  241.38   35.60
  -9  -4   2  235.58   22.40
  -9   4  -2  249.97   35.50
  -9   4  -2  273.67   31.40
  -9  -4   2  241.98   24.90
   9  -4   2  255.67   34.90
   9  -4   2  250.17   33.50
   9  -4   2  266.67   24.70
   9   4  -2  224.58   22.00
   9  -4   2  251.87   37.80
   9   4  -2  212.48   20.10
  -9  -4   1  294.57   19.00
  -9  -4   1  286.47   18.90
  -9  -4   1  308.67   23.40
  -9  -4   1  275.17   21.50
  -9   4  -1  310.57   33.40
  -9   4  -1  296.37   41.20
  -9   4  -1  318.77   20.30
  -9   4  -1  282.97   29.30
  -9  -4   1  311.67   21.50
  -9   4  -1  285.27   27.50
  -9  -4   1  321.77   21.10
  -9   4  -1  288.77   30.10
   9  -4   1  332.07   33.00
   9  -4   1  305.87   31.30
   9  -4   1  327.47   26.60
   9   4  -1  262.67   20.30
   9  -4   1  332.77   21.60
   9  -4   1  267.97   28.40
  -9  -4   0   70.19   11.20
  -9   4   0   67.29   17.60
  -9   4   0   43.20   13.40
  -9  -4   0   41.60   12.70
  -9   4   0   47.40   13.40
  -9  -4   0   82.79   19.80
  -9   4   0   25.10   12.90
  -9  -4   0   49.90   11.00
  -9  -4   0   59.69    9.90
  -9  -4   0   51.09    8.40
   9  -4   0   58.59   13.60
   9  -4   0   52.29   14.70
   9  -4   0   37.30   15.80
   9   4   0   48.70    9.20
   9   4   0   56.49   10.30
   9  -4   0   35.00   12.90
  -9   4   1  346.67   30.60
  -9  -4  -1  311.57   22.90
  -9   4   1  303.87   29.00
  -9  -4  -1  297.57   24.80
  -9   4   1  304.17   31.80
  -9  -4  -1  303.27   23.30
  -9  -4  -1  315.97   31.00
  -9  -4  -1  290.57   24.60
   9   4   1  329.97   25.00
   9  -4  -1  332.07   33.40
   9  -4  -1  312.87   27.70
   9  -4  -1  312.17   18.50
   9   4   1  325.47   23.20
   9  -4  -1  336.87   29.60
   9  -4  -1  298.77   23.70
  -9  -4  -2  235.28   26.70
  -9   4   2  254.37   34.10
  -9  -4  -2  197.28   33.70
  -9  -4  -2  251.07   29.90
  -9   4   2  221.98   30.80
  -9  -4  -2  251.37   24.60
  -9  -4  -2  247.18   27.10
  -9  -4  -2  238.98   24.60
  -9   4   2  325.87   42.70
   9  -4  -2  243.08   16.60
   9  -4  -2  249.88   22.10
   9  -4  -2  267.47   27.40
   9   4   2  223.38   16.50
   9  -4  -2  232.38   26.80
   9   4   2  251.27   18.40
   9  -4  -2  240.58   36.60
  -9  -4  -3  404.56   37.00
  -9   4   3  384.06   40.00
  -9  -4  -3  413.16   36.90
  -9   4   3  356.06   39.10
  -9  -4  -3  454.55   44.10
  -9  -4  -3  451.25   41.50
  -9  -4  -3  438.36   39.80
  -9  -4  -3  402.06   44.00
  -9   4   3  452.95   46.40
  -9  -4  -3  353.26   38.60
   9  -4  -3  388.26   36.90
   9  -4  -3  441.46   41.00
   9   4   3  421.76   32.80
   9  -4  -3  404.26   36.20
   9  -4  -3  475.05   46.70
  -9  -4  -4   16.00   20.70
  -9  -4  -4   -1.40   14.30
  -9  -4  -4   24.90   21.20
  -9   4   4   -9.70   19.20
  -9   4   4   56.69   21.60
  -9  -4  -4   40.20   22.20
  -9  -4  -4  -10.20   13.30
  -9  -4  -4   11.70   18.80
   9  -4  -4   47.80   25.20
   9   4   4    8.20   19.00
   9   4   4   -5.60   14.60
   9  -4  -4   23.20   19.30
  -9  -4  -5   41.40   24.60
  -9  -4  -5    5.80   20.30
  -9  -4  -5   -3.90   22.70
  -9   4   5    9.60   20.90
   9  -4  -5  127.89   33.80
   9  -4  -5   14.70   28.20
   9   4   5   40.10   22.30
 -10   4  -5   67.69   31.00
 -10   4  -5   32.10   25.90
 -10  -4   5   44.00   24.30
 -10  -4   5   43.20   25.40
 -10   4  -5   19.00   30.30
 -10   4  -5   33.40   27.10
  10  -4   5   21.70   27.20
  10   4  -5   53.19   35.70
  10  -4   5   -3.70   22.20
 -10   4  -4  148.89   37.50
 -10   4  -4   77.99   27.60
 -10  -4   4   49.90   23.10
  10  -4   4   94.19   26.50
  10   4  -4   79.79   26.20
  10  -4   4  130.99   33.70
  10  -4   4  127.19   34.30
  10   4  -4  120.79   25.50
  10  -4   4  146.19   32.10
 -10   4  -3  117.99   29.10
 -10   4  -3   67.19   25.60
 -10  -4   3   81.49   20.70
 -10  -4   3   79.59   19.40
 -10  -4   3   81.59   22.10
 -10  -4   3   88.09   20.90
 -10   4  -3   87.09   20.70
 -10   4  -3  102.09   26.50
 -10   4  -3   80.59   22.90
  10  -4   3   53.39   19.00
  10   4  -3   53.19   17.60
  10  -4   3   75.79   23.70
  10   4  -3   69.79   15.50
  10  -4   3   67.99   24.30
  10   4  -3   85.99   20.90
 -10  -4   2  120.59   18.50
 -10   4  -2  105.39   25.80
 -10   4  -2   96.59   23.40
 -10  -4   2   92.69   23.90
 -10  -4   2  139.69   22.30
 -10  -4   2   86.39   18.20
 -10  -4   2  121.99   18.70
 -10   4  -2  104.29   23.70
 -10   4  -2   96.59   17.40
  10  -4   2  142.29   30.70
  10  -4   2  132.79   23.80
  10   4  -2  126.59   17.60
  10  -4   2  110.29   24.10
  10  -4   2  107.99   19.30
  10  -4   2  117.69   26.30
  10   4  -2   91.89   15.30
 -10  -4   1  383.36   24.90
 -10  -4   1  373.96   22.30
 -10  -4   1  373.76   22.30
 -10  -4   1  366.46   22.30
 -10   4  -1  357.86   32.20
 -10   4  -1  375.76   38.00
 -10   4  -1  367.36   35.10
 -10   4  -1  339.57   35.70
 -10  -4   1  329.97   25.10
 -10  -4   1  376.26   26.70
  10  -4   1  347.77   31.70
  10  -4   1  322.17   34.90
  10   4  -1  297.67   22.00
  10  -4   1  312.87   21.40
  10  -4   1  329.27   34.10
 -10  -4   0  510.95   25.60
 -10   4   0  517.65   40.50
 -10  -4   0  594.24   45.70
 -10   4   0  523.55   43.90
 -10   4   0  549.95   40.00
 -10  -4   0  520.35   32.30
 -10  -4   0  541.55   36.30
 -10   4   0  498.05   36.30
 -10  -4   0  520.15   30.30
 -10  -4   0  546.45   32.20
 -10  -4   0  541.35   26.10
  10  -4   0  551.24   44.20
  10   4   0  530.75   33.20
  10  -4   0  576.14   40.30
  10  -4   0  553.04   36.70
  10   4   0  529.55   31.00
  10  -4   0  465.55   36.90
 -10  -4  -1  297.97   24.20
 -10  -4  -1  301.17   27.00
 -10  -4  -1  275.17   30.80
 -10   4   1  288.37   33.70
 -10  -4  -1  288.67   30.30
 -10   4   1  352.66   32.30
 -10   4   1  301.17   23.30
 -10  -4  -1  285.47   26.30
 -10  -4  -1  294.07   22.60
  10  -4  -1  401.26   27.00
  10  -4  -1  357.36   31.90
  10   4   1  396.06   28.20
  10  -4  -1  352.26   36.80
  10  -4  -1  368.16   17.10
  10  -4  -1  374.56   30.00
  10   4   1  355.26   24.80
 -10  -4  -2   98.29   17.70
 -10  -4  -2  104.19   21.50
 -10  -4  -2  122.19   20.20
 -10  -4  -2  100.99   20.60
 -10   4   2  113.69   26.10
 -10  -4  -2  122.79   28.00
 -10   4   2  105.79   22.80
 -10   4   2  125.99   24.20
  10  -4  -2  113.79   11.10
  10  -4  -2   92.09   20.00
  10  -4  -2  101.59   21.20
  10  -4  -2   99.89   15.80
  10   4   2  105.79    9.30
  10  -4  -2  142.49   28.80
 -10  -4  -3   78.09   19.20
 -10  -4  -3   82.39   20.10
 -10  -4  -3   71.29   22.40
 -10  -4  -3   93.09   22.90
 -10   4   3   65.49   24.50
 -10  -4  -3   38.40   19.30
 -10   4   3   68.99   22.00
  10  -4  -3   79.59   20.70
  10   4   3   92.59   17.30
  10  -4  -3   83.59   22.10
  10  -4  -3   85.39   23.60
  10  -4  -3  164.98   34.80
  10   4   3   89.39   16.40
 -10  -4  -4  128.99   28.80
 -10   4   4   59.19   25.10
 -10  -4  -4  123.89   32.40
 -10  -4  -4   66.29   24.10
 -10  -4  -4   66.29   28.50
 -10  -4  -4  114.29   34.20
 -10  -4  -4  136.69   30.20
 -10   4   4   54.69   25.70
  10  -4  -4  112.29   29.10
  10  -4  -4  155.08   38.10
  10   4   4   78.39   22.50
  10   4   4   60.69   20.60
 -10  -4  -5    7.00   29.20
 -10  -4  -5   58.59   26.40
  10   4   5   45.60   25.80
  10  -4  -5   68.99   36.70
  10  -4  -5   86.99   50.49
 -11   4  -4   33.00   25.30
 -11  -4   4    8.70   20.00
 -11   4  -4   40.30   23.70
 -11  -4   4   39.00   19.80
  11  -4   4  113.19   31.50
  11  -4   4   62.19   27.70
  11  -4   4   63.19   24.80
  11   4  -4    5.50   23.10
  11   4  -4   19.10   18.60
  11  -4   4   15.70   23.30
 -11  -4   3  174.08   29.60
 -11  -4   3  280.87   29.50
 -11  -4   3  244.28   33.80
 -11   4  -3  268.67   29.10
 -11  -4   3  246.28   28.10
 -11   4  -3  239.58   41.50
 -11   4  -3  228.58   36.10
  11  -4   3  189.48   37.80
  11   4  -3  171.48   25.90
  11   4  -3  155.58   23.60
  11  -4   3  162.48   28.40
  11   4  -3  212.58   32.50
  11  -4   3  171.28   32.70
 -11  -4   2  289.17   25.80
 -11  -4   2  280.17   27.80
 -11   4  -2  336.07   24.80
 -11   4  -2  233.38   38.60
 -11   4  -2  300.17   42.90
 -11   4  -2  300.47   34.20
 -11  -4   2  346.77   30.20
 -11  -4   2  293.57   24.50
  11  -4   2  285.57   33.00
  11   4  -2  204.88   25.80
  11  -4   2  244.98   38.70
  11  -4   2  247.28   25.30
  11   4  -2  273.57   23.10
  11  -4   2  274.97   29.60
 -11  -4   1  299.47   23.60
 -11  -4   1  296.57   18.60
 -11  -4   1  363.96   27.40
 -11  -4   1  290.17   20.90
 -11  -4   1  290.17   20.70
 -11   4  -1  310.27   37.00
 -11   4  -1  296.77   31.30
 -11  -4   1  271.37   24.70
 -11   4  -1  249.97   35.60
 -11   4  -1  307.77   34.40
 -11   4  -1  272.57   31.00
  11  -4   1  351.66   19.20
  11  -4   1  381.66   38.10
  11  -4   1  354.96   30.10
  11  -4   1  325.37   35.40
  11   4  -1  313.07   21.50
  11  -4   1  357.06   33.00
 -11  -4   0  143.59   17.20
 -11  -4   0  184.08   19.10
 -11  -4   0  149.88   16.20
 -11   4   0  197.78   29.70
 -11   4   0  109.69   24.40
 -11  -4   0  182.08   20.90
 -11  -4   0  153.78    9.10
 -11  -4   0  170.18   30.10
 -11   4   0  168.18   25.50
 -11   4   0  181.58   24.00
  11  -4   0  143.99   21.40
  11  -4   0  140.99   23.40
  11  -4   0  173.08   29.50
  11  -4   0  141.59   23.80
  11   4   0  158.78   25.80
  11   4   0  148.39   14.40
 -11  -4  -1  324.07   37.30
 -11   4   1  346.47   25.40
 -11   4   1  403.26   37.70
 -11  -4  -1  310.97   28.20
 -11  -4  -1  347.57   22.30
 -11  -4  -1  351.76   29.40
 -11  -4  -1  330.67   26.00
 -11   4   1  316.17   31.30
 -11   4   1  364.06   34.50
 -11  -4  -1  363.16   35.50
  11  -4  -1  299.67   34.30
  11  -4  -1  270.17   27.90
  11  -4  -1  273.47   29.10
  11  -4  -1  274.97   25.30
  11   4   1  272.67   23.40
  11   4   1  262.37   25.40
 -11  -4  -2  226.28   27.60
 -11  -4  -2  262.67   25.70
 -11   4   2  224.58   31.70
 -11   4   2  283.27   38.20
 -11   4   2  255.57   40.40
 -11  -4  -2  311.67   44.90
  11   4   2  346.87   31.50
  11  -4  -2  197.98   29.30
  11  -4  -2  310.17   35.50
  11  -4  -2  294.17   33.00
 -11   4   3  164.38   36.70
 -11  -4  -3  155.18   33.80
 -11  -4  -3  227.08   36.90
 -11   4   3  232.18   36.10
 -11  -4  -3  186.18   29.50
 -11  -4  -3  151.38   32.90
 -11  -4  -3  192.78   33.60
 -11  -4  -3  199.38   31.10
 -11  -4  -3  149.69   27.90
  11  -4  -3  229.68   39.90
  11   4   3  222.28   22.60
  11  -4  -3  197.88   28.20
  11  -4  -3  187.48   31.20
  11   4   3  232.08   21.50
  11  -4  -3  173.38   29.30
 -11   4   4   44.60   24.60
 -11   4   4   50.79   24.10
 -11  -4  -4    5.90   24.70
 -11  -4  -4   17.90   22.60
 -11  -4  -4    7.50   18.70
 -11  -4  -4   38.50   26.90
 -11  -4  -4   24.50   18.80
 -11  -4  -4   28.60   18.20
  11   4   4   53.49   18.20
  11   4   4   57.19   21.70
  11  -4  -4   15.90   28.30
  11  -4  -4   35.00   21.10
 -12   4  -4  108.49   30.00
 -12  -4   4   41.60   23.80
 -12  -4   4   33.70   21.40
 -12   4  -4   98.89   32.30
  12  -4   4   63.19   27.90
  12  -4   4   60.89   29.60
  12   4  -4    5.10   20.10
  12  -4   4   28.70   23.60
  12   4  -4   60.49   30.10
 -12  -4   3   46.80   18.20
 -12  -4   3   39.30   18.00
 -12   4  -3   36.40   18.30
 -12   4  -3   39.10   22.40
 -12  -4   3   17.90   14.20
 -12   4  -3   51.49   18.40
 -12  -4   3   34.30   16.70
 -12   4  -3   75.29   26.40
  12   4  -3   23.40   16.00
  12  -4   3   45.50   19.10
  12  -4   3   38.30   19.90
  12  -4   3   13.90   21.20
  12   4  -3   44.90   18.50
 -12   4  -2   55.59   21.50
 -12   4  -2   62.49   23.70
 -12  -4   2   30.30   12.10
 -12  -4   2   44.30   16.40
 -12   4  -2    8.60   16.90
 -12   4  -2    9.50   10.50
 -12  -4   2   32.80   11.00
 -12  -4   2   48.20   14.70
 -12   4  -2   54.39   22.30
  12  -4   2   35.00   20.30
  12  -4   2   46.00   18.30
  12  -4   2   51.09   13.40
  12   4  -2   34.50   10.90
  12   4  -2   15.80   14.10
  12  -4   2   86.09   22.40
 -12   4  -1  122.59   27.30
 -12   4  -1  146.29   25.30
 -12   4  -1  172.98   33.20
 -12   4  -1  140.09   26.60
 -12   4  -1  113.99   28.00
 -12  -4   1  147.39   15.10
 -12  -4   1  146.49   20.80
 -12  -4   1  158.98   21.50
 -12  -4   1  139.09   18.70
 -12  -4   1  136.89   14.90
  12  -4   1  170.28   30.60
  12  -4   1  159.88   23.40
  12   4  -1  165.78   16.00
  12  -4   1  151.68   30.20
  12  -4   1  148.79   26.70
 -12   4   0  722.43   53.09
 -12   4   0  702.73   49.30
 -12  -4   0  687.33   55.39
 -12   4   0  722.83   47.40
 -12  -4   0  757.72   43.50
 -12  -4   0  732.43   44.10
 -12  -4   0  684.33   40.10
 -12   4   0  648.94   53.29
 -12  -4   0  827.82   48.40
  12  -4   0  679.53   54.79
  12  -4   0  751.32   51.19
  12  -4   0  707.23   45.20
  12   4   0  718.33   42.90
  12  -4   0  734.03   50.19
 -12   4   1  179.08   31.60
 -12   4   1  163.68   18.70
 -12   4   1  146.79   28.00
 -12  -4  -1  179.38   28.60
 -12  -4  -1  135.39   30.40
 -12  -4  -1  168.98   24.80
 -12   4   1  159.28   27.10
 -12  -4  -1  155.18   24.70
 -12  -4  -1  152.48   20.80
 -12  -4  -1  161.18   14.50
  12  -4  -1  202.88   26.40
  12  -4  -1  116.49   26.80
  12  -4  -1  182.08   28.00
  12   4   1  143.29   22.00
 -12  -4  -2   61.19   18.80
 -12  -4  -2   30.80   13.80
 -12   4   2   88.39   25.80
 -12   4   2   45.50   18.30
 -12  -4  -2   55.39   19.50
 -12  -4  -2   45.20   14.80
 -12   4   2   30.00   18.10
  12  -4  -2   40.60   17.80
  12  -4  -2   42.70    9.40
  12  -4  -2   48.60   23.40
  12   4   2   34.30   15.30
  12  -4  -2   31.20   17.10
 -12  -4  -3   35.70   17.50
 -12   4   3   43.80   20.10
 -12  -4  -3   76.79   23.20
 -12  -4  -3   40.60   20.20
 -12  -4  -3   22.40   19.50
 -12   4   3   53.89   25.50
 -12  -4  -3   42.30   20.10
 -12  -4  -3   27.10   21.90
 -12  -4  -3   40.10   16.80
 -12   4   3   51.29   19.80
  12   4   3   24.70    9.70
  12  -4  -3   13.60   20.00
  12  -4  -3   56.89   17.50
  12   4   3   14.40   12.20
  12  -4  -3   19.80   17.70
  12  -4  -3   49.70   20.00
 -12  -4  -4   66.39   26.40
 -12   4   4   60.99   28.60
 -12  -4  -4   57.69   21.90
 -12  -4  -4   82.69   26.70
 -12  -4  -4   65.49   28.70
  12  -4  -4   42.50   30.40
  12  -4  -4   90.49   27.90
 -13  -4   4    8.70   20.90
 -13   4  -4  -13.60   21.40
 -13  -4   4   -2.10   17.00
 -13   4  -4   22.80   23.60
  13  -4   4  -11.90   18.90
  13   4  -4   22.40   29.40
  13  -4   4   30.50   23.50
  13  -4   4    6.30   37.80
  13  -4   4   21.30   25.10
 -13  -4   3   67.79   17.90
 -13  -4   3   98.09   24.40
 -13  -4   3   83.99   23.10
 -13   4  -3   47.40   25.30
 -13   4  -3   78.09   26.80
 -13  -4   3   70.29   18.40
 -13   4  -3   41.90   18.80
 -13   4  -3  104.09   26.90
  13   4  -3   79.59   18.60
  13   4  -3   38.20   18.40
  13  -4   3   72.69   24.00
  13   4  -3   87.29   20.10
  13  -4   3   59.19   24.30
 -13  -4   2  175.08   26.90
 -13   4  -2  187.58   31.10
 -13   4  -2  241.68   42.40
 -13   4  -2  226.78   40.90
 -13   4  -2  199.78   19.50
 -13  -4   2  185.68   17.60
 -13  -4   2  260.47   34.70
 -13  -4   2  199.08   23.50
  13  -4   2  181.38   19.60
  13   4  -2  170.18   33.80
  13  -4   2  244.38   40.60
  13  -4   2  249.08   36.40
  13  -4   2  253.77   28.10
  13   4  -2  237.88   22.20
 -13   4  -1   98.29   24.50
 -13  -4   1   94.99   21.00
 -13   4  -1  104.09   26.50
 -13  -4   1   72.29   11.30
 -13  -4   1  113.29   13.40
 -13  -4   1  112.09   16.70
 -13  -4   1   76.39   17.10
 -13   4  -1   93.99   24.30
 -13   4  -1  105.79   31.40
  13   4  -1  110.19   16.40
  13  -4   1  130.49   31.60
  13  -4   1   87.29   20.50
  13  -4   1   64.39   17.90
  13   4  -1   95.29   13.70
 -13   4   0  260.17   40.30
 -13   4   0  251.77   28.40
 -13   4   0  251.67   33.50
 -13  -4   0  238.68   39.70
 -13  -4   0  228.68   26.80
 -13   4   0  285.57   38.60
 -13  -4   0  248.98   24.60
 -13  -4   0  269.37   23.10
  13   4   0  234.58   20.30
  13  -4   0  210.88   33.40
  13  -4   0  246.88   36.70
  13  -4   0  251.67   26.90
 -13  -4  -1   94.19   17.40
 -13  -4  -1  104.69   22.10
 -13  -4  -1   97.09    8.90
 -13  -4  -1   90.29   18.40
 -13   4   1   62.89   19.60
 -13   4   1   67.69   22.50
 -13   4   1   78.99   15.70
 -13  -4  -1   55.99   23.20
 -13   4   1   73.39   19.30
  13  -4  -1   85.49   24.80
  13   4   1   69.59   13.60
  13  -4  -1   68.99   17.60
  13   4   1   92.79   17.70
 -13  -4  -2  244.08   42.20
 -13  -4  -2  260.57   27.60
 -13   4   2  238.78   37.80
 -13  -4  -2  190.38   29.90
 -13   4   2  237.38   41.80
 -13  -4  -2  201.28   34.10
 -13   4   2  185.48   31.10
 -13  -4  -2  220.58   23.00
  13  -4  -2  183.98   41.30
  13  -4  -2  165.08   29.60
  13   4   2  227.48   27.60
  13  -4  -2  179.08   26.30
 -13  -4  -3  105.59   23.20
 -13  -4  -3   79.49   29.50
 -13  -4  -3   89.39   22.80
 -13  -4  -3   84.09   26.30
 -13   4   3  116.79   31.10
 -13   4   3   59.59   22.00
 -13  -4  -3  130.59   33.80
 -13  -4  -3  102.29   24.80
 -13   4   3   55.19   25.60
 -13  -4  -3  101.39   22.70
  13  -4  -3   56.79   17.70
  13  -4  -3   59.19   23.50
 -13  -4  -4    8.50   19.30
 -13   4   4   19.50   24.20
 -13  -4  -4    4.70   23.60
  13  -4  -4   12.30   27.20
  13   4   4   17.90   18.40
  13  -4  -4  -25.30   22.70
 -14   4  -3   23.50   26.30
 -14  -4   3   27.40   14.80
 -14   4  -3   31.60   22.00
 -14   4  -3   -2.60   21.80
 -14  -4   3    3.90   16.50
 -14  -4   3    4.50   12.80
 -14  -4   3   10.20   16.00
  14   4  -3  -14.50   16.30
  14  -4   3   15.20   19.70
  14  -4   3   53.49   22.40
  14  -4   3   18.20   22.60
  14   4  -3  -19.40   19.10
  14  -4   3   11.20   15.20
 -14  -4   2    3.40   11.80
 -14  -4   2   -6.60    9.40
 -14  -4   2    6.40   12.80
 -14   4  -2    3.00   14.00
 -14   4  -2   -2.40   17.80
 -14   4  -2   44.30   21.50
 -14   4  -2   -2.60   15.50
  14   4  -2   -3.00   10.20
  14  -4   2    7.10   16.00
  14  -4   2   -8.30   16.30
 -14  -4   1  132.69   15.70
 -14  -4   1  204.98   23.20
 -14  -4   1  178.58   20.00
 -14   4  -1  155.78   34.90
 -14   4  -1  138.89   33.10
 -14   4  -1  105.99   27.00
 -14  -4   1  178.08   27.70
 -14  -4   1  218.68   28.50
 -14   4  -1  119.79   28.30
  14   4  -1  156.48   16.70
  14  -4   1   99.89   28.60
  14   4  -1  130.59   19.70
  14  -4   1  148.49   22.80
 -14   4   0  363.06   41.90
 -14  -4   0  370.76   31.90
 -14  -4   0  387.56   42.40
 -14   4   0  385.96   36.30
 -14  -4   0  373.66   28.70
 -14  -4   0  332.67   33.40
 -14   4   0  410.36   42.60
 -14  -4   0  372.16   33.40
 -14   4   0  425.66   38.90
  14   4   0  324.37   29.90
  14  -4   0  312.97   30.60
  14  -4   0  319.77   38.10
  14  -4   0  378.06   41.50
  14   4   0  342.97   25.50
 -14  -4  -1  156.88   26.80
 -14   4   1  140.69   29.80
 -14   4   1  124.69   25.50
 -14  -4  -1  135.59   21.40
 -14  -4  -1  107.79   28.80
 -14   4   1  150.88   20.60
 -14   4   1  100.29   26.40
 -14  -4  -1  124.69   21.50
  14   4   1  177.08   20.70
  14  -4  -1  145.49   26.10
  14  -4  -1  144.39   31.60
  14  -4  -1  144.79   22.20
  14   4   1  197.98   27.60
 -14  -4  -2   10.90   11.70
 -14  -4  -2   12.30    9.80
 -14   4   2    2.80   15.30
 -14  -4  -2   10.40   13.60
 -14  -4  -2  -21.90   13.90
 -14   4   2   13.50   19.10
 -14  -4  -2   -7.40   12.10
  14   4   2   12.20   13.50
  14  -4  -2   -2.80   16.50
  14  -4  -2   11.90   19.60
 -14  -4  -3   27.40   19.10
 -14   4   3   13.00   19.70
 -14   4   3   -9.80   19.10
 -14  -4  -3   18.20   19.80
 -14  -4  -3   34.10   18.00
 -14  -4  -3   22.60   18.70
 -14  -4  -3   12.60   17.40
 -14  -4  -3  -23.90   12.80
 -14  -4  -3   33.60   38.60
 -14   4   3   58.49   31.00
  14  -4  -3  -11.80   21.10
  14  -4  -3   15.40   24.10
  14  -4  -3   10.90   14.20
 -15  -4   3   55.49   19.00
 -15   4  -3   52.79   31.00
 -15  -4   3   51.69   21.90
 -15   4  -3   87.09   28.90
  15  -4   3   57.29   27.70
  15  -4   3   33.30   23.10
  15  -4   3   81.39   27.30
 -15   4  -2  107.59   33.70
 -15   4  -2   91.69   28.80
 -15   4  -2   85.99   23.80
 -15   4  -2  140.49   31.20
 -15  -4   2  134.39   21.30
 -15  -4   2   69.89   17.80
 -15  -4   2   90.59   21.70
  15   4  -2   57.79   19.20
  15  -4   2   83.19   25.50
  15  -4   2  104.59   23.30
  15  -4   2   65.59   26.30
 -15  -4   1  243.48   25.20
 -15  -4   1  290.07   20.90
 -15   4  -1  251.67   36.50
 -15   4  -1  243.38   42.10
 -15   4  -1  236.48   38.30
 -15  -4   1  295.67   30.80
 -15   4  -1  246.68   43.50
  15  -4   1  251.87   29.70
  15  -4   1  193.18   36.20
 -15   4   0   53.49   26.30
 -15  -4   0   51.89   15.20
 -15   4   0   67.89   19.50
 -15  -4   0   84.49   20.80
 -15  -4   0   83.79   18.10
 -15  -4   0  115.49   31.70
 -15   4   0   30.80   19.40
  15   4   0   74.69   13.20
  15  -4   0  113.49   32.30
  15   4   0   52.09   14.60
  15  -4   0   41.40   16.40
  15  -4   0  119.09   24.70
 -15   4   1  207.18   34.90
 -15  -4  -1  242.58   28.40
 -15  -4  -1  194.98   26.40
 -15  -4  -1  203.38   38.40
 -15  -4  -1  188.98   31.20
 -15   4   1  198.08   22.80
 -15   4   1  135.79   30.30
  15  -4  -1  274.67   46.60
  15  -4  -1  252.77   26.50
  15   4   1  275.07   32.00
  15  -4  -1  174.78   35.70
  15   4   1  237.08   24.60
 -15  -4  -2  109.59   22.90
 -15  -4  -2   71.89   21.20
 -15  -4  -2  114.39   32.60
 -15  -4  -2  106.89   26.20
 -15   4   2  136.19   31.10
 -15   4   2  103.99   26.10
 -15   4   2   79.59   33.30
  15  -4  -2  141.29   29.30
  15  -4  -2  144.79   33.20
  15  -4  -2  138.09   23.90
 -15  -4  -3   59.99   24.80
 -15  -4  -3   54.09   27.90
 -15   4   3   67.79   28.80
 -16   4  -2   43.10   26.50
 -16   4  -2  -16.50   16.30
 -16  -4   2    5.80   18.40
  16  -4   2   -9.40   20.10
  16  -4   2   25.00   21.10
  16  -4   2    6.90   17.70
 -16   4  -1  138.79   26.20
 -16  -4   1   92.29   17.40
 -16   4  -1  105.39   27.60
 -16  -4   1  121.89   14.40
 -16  -4   1  105.39   23.30
 -16   4  -1   59.59   29.40
 -16  -4   1  112.09   27.50
  16   4  -1   69.69   22.50
  16  -4   1  113.89   31.40
  16  -4   1  144.89   22.90
  16  -4   1  156.18   34.40
  16   4  -1  121.69   20.60
 -16   4   0   14.60   17.50
 -16  -4   0    0.60   20.90
 -16  -4   0    1.60   12.10
 -16  -4   0   -1.60   12.30
 -16  -4   0   -1.80   16.70
 -16   4   0  -20.80   15.10
 -16   4   0  -32.10   18.70
  16  -4   0  -28.30   14.10
  16   4   0    4.90   12.50
  16  -4   0   28.10   19.80
 -16   4   1  105.89   18.20
 -16  -4  -1   90.49   21.20
 -16  -4  -1  105.09   24.30
 -16   4   1  104.49   26.50
 -16  -4  -1  142.69   21.60
 -16   4   1  102.79   24.80
 -16  -4  -1  159.08   37.10
 -16   4   1  114.99   33.30
  16  -4  -1   98.09   25.50
  16   4   1  124.19   20.50
  16  -4  -1  137.99   31.80
 -16   4   2  -17.20   19.70
 -16  -4  -2    7.50   17.30
 -16  -4  -2    6.10   15.40
 -16  -4  -2   -6.00   19.50
  16  -4  -2   47.00   27.20
 -17  -4   2   93.79   40.60
 -17   4  -2   60.39   30.00
 -17  -4   2   70.49   20.70
 -17   4  -2   80.09   29.50
  17  -4   2   74.09   31.60
  17  -4   2   77.79   25.60
 -17   4  -1   47.80   26.10
 -17  -4   1   53.39   18.50
 -17  -4   1   14.50   23.20
 -17   4  -1   21.40   20.90
 -17  -4   1   68.59   21.40
  17  -4   1   30.60   29.60
 -17  -4   0    0.30   16.00
 -17   4   0   38.90   26.80
 -17   4   0    9.60   18.50
 -17  -4   0   -4.40   21.90
 -17  -4   0   -7.10   11.10
  17  -4   0   38.30   23.20
 -17  -4  -1   30.70   15.80
 -17  -4  -1   54.69   22.30
 -17   4   1   35.20   22.30
 -17  -4  -1   51.89   31.70
  17  -4  -1   37.30   26.40
 -17  -4  -2   72.59   31.00
 -17   4   2   83.09   25.50
 -17  -4  -2   38.20   22.40
  17  -4  -2  104.19   33.70
 -18  -4   0   -1.20   19.90
 -18   4   0   12.40   21.30
 -18   4   0    5.10   23.30
 -18  -4   0   14.10   17.80
  18  -4   0   29.50   27.10
   0  -5   6  166.88   40.20
   0   5  -6  187.38   44.30
   0  -5   6  115.89   37.60
   0   5  -5   -9.10   16.10
   0   5  -5   17.50   19.90
   0   5  -5    9.10   20.60
   0  -5   5   -0.90   17.00
   0  -5   5   -7.30   18.50
   0   5  -4    5.20   13.60
   0   5  -4   -1.20   12.90
   0  -5   4   -7.50   14.40
   0  -5   4  -10.80   11.10
   0  -5   4    7.10   12.90
   0   5  -4    4.90   13.40
   0   5  -4   15.60   16.30
   0   5  -3    3.30   11.80
   0  -5   3    7.80    8.10
   0   5  -3    2.50    9.20
   0   5  -3   11.40   11.00
   0  -5   3   11.70   13.80
   0   5  -3   16.40   10.80
   0   5  -3   -1.70    9.20
   0   5  -3   -6.80    7.70
   0   5  -3   15.60    9.40
   0  -5   3    8.20   11.70
   0  -5   3   16.10   11.30
   0   5  -2 1847.02   82.99
   0   5  -2 1764.92   82.69
   0   5  -2 1823.92   85.79
   0  -5   2 1867.41   84.49
   0   5  -2 1778.72   79.19
   0   5  -2 1786.82   85.59
   0  -5   2 1776.92   85.39
   0  -5   2 1855.41   83.99
   0  -5   2 1877.61   78.79
   0  -5   2 1770.12   84.49
   0  -5   2 1797.02   86.69
   0   5  -1 1691.03   74.29
   0   5  -1 1650.23   67.49
   0   5  -1 1683.13   71.79
   0  -5   1 1678.13   75.69
   0  -5   1 1628.64   72.69
   0  -5   1 1734.23   74.79
   0  -5   1 1700.63   65.79
   0  -5   1 1728.33   72.69
   0   5  -1 1747.63   79.69
   0   5  -1 1711.03   72.59
   0   5  -1 1659.43   73.49
   0  -5   1 1705.33   74.59
   0  -5   0    1.70    6.00
   0   5   0    0.40    3.60
   0   5   0    5.90    4.20
   0  -5   0    6.30    6.30
   0   5   0   -2.00    4.10
   0  -5   0    3.80    4.20
   0  -5   0    0.50    4.00
   0   5   0   -1.10    5.00
   0  -5   0    0.10    3.70
   0   5   0    2.70    5.70
   0   5   1 1724.53   73.89
   0  -5  -1 1737.53   77.89
   0  -5  -1 1695.33   74.39
   0  -5  -1 1717.83   74.39
   0  -5  -1 1774.22   76.89
   0   5   1 1671.33   77.59
   0  -5  -1 1725.03   75.29
   0   5   1 1711.03   74.29
   0   5   1 1691.83   75.59
   0  -5  -2 1898.91   86.99
   0  -5  -2 1918.91   87.99
   0  -5  -2 1906.51   92.09
   0   5   2 1874.41   86.09
   0   5   2 1909.61   91.69
   0  -5  -2 1885.91   89.99
   0   5   2 1811.62   86.09
   0   5   2 1817.22   88.49
   0  -5  -2 1814.52   88.19
   0   5   2 1778.42   87.89
   0  -5  -3  -16.70    9.80
   0   5   3   -3.50    9.70
   0  -5  -3   12.10   11.70
   0   5   3   20.40   13.90
   0   5   3    7.00   10.30
   0  -5  -3   -2.70   15.00
   0   5   3   -5.90    7.00
   0  -5  -3    5.90   10.00
   0   5   3   -7.10    8.70
   0   5   3   -4.60   11.10
   0  -5  -3   -0.20   10.10
   0  -5  -4    3.50   14.60
   0  -5  -4   15.30   18.60
   0  -5  -4   -1.80   12.00
   0  -5  -4  -31.20   13.30
   0   5   4    5.60   14.90
   0  -5  -4    8.40   13.90
   0   5   4   13.20   13.50
   0   5   5  -28.60   16.30
   0   5   5  -19.80   17.30
   0  -5  -5  -17.90   18.60
   0  -5  -5    4.10   21.70
   0  -5  -5   36.10   23.00
   0   5   6  171.88   43.00
   0  -5  -6   80.89   31.90
   0   5   6  189.28   46.10
   0  -5  -6  105.49   39.10
  -1   5  -6   -7.30   25.80
  -1  -5   6   52.69   29.60
  -1   5  -6    0.70   25.80
  -1   5  -6  -12.90   25.60
  -1  -5   6   59.69   42.90
   1  -5   6  -14.70   22.10
   1  -5   6   16.50   23.80
   1   5  -6  -19.20   29.10
   1   5  -6  -26.10   24.60
   1   5  -6  -15.50   26.80
  -1   5  -5  279.77   45.20
  -1   5  -5  320.97   56.79
  -1  -5   5  222.48   44.00
  -1  -5   5  226.48   42.90
  -1   5  -5  176.78   40.40
   1   5  -5  199.38   45.10
   1  -5   5  228.18   42.90
   1  -5   5  127.79   30.90
   1   5  -5  198.78   37.30
  -1  -5   4  324.17   45.10
  -1   5  -4  304.97   46.30
  -1  -5   4  300.97   31.20
  -1   5  -4  331.57   35.10
  -1  -5   4  381.76   42.30
  -1   5  -4  331.47   38.20
   1   5  -4  349.07   49.30
   1  -5   4  337.27   45.70
   1  -5   4  315.17   32.40
   1   5  -4  290.27   35.30
   1   5  -4  301.07   41.20
   1   5  -4  365.26   42.90
   1  -5   4  326.37   39.40
  -1  -5   3  384.86   31.50
  -1   5  -3  355.36   33.00
  -1   5  -3  354.46   30.10
  -1   5  -3  361.96   33.20
  -1  -5   3  413.56   30.80
  -1  -5   3  338.27   33.00
  -1  -5   3  326.77   31.20
  -1   5  -3  383.96   32.20
  -1   5  -3  353.86   31.70
   1  -5   3  378.76   35.40
   1   5  -3  365.46   36.60
   1  -5   3  369.56   33.80
   1  -5   3  363.26   29.30
   1  -5   3  320.57   35.20
   1   5  -3  368.46   32.40
   1  -5   3  395.96   34.00
   1   5  -3  368.06   30.70
   1   5  -3  404.46   32.50
   1   5  -3  332.17   31.50
   1  -5   3  359.06   35.30
   1   5  -3  335.97   31.60
  -1   5  -2  158.78   16.10
  -1   5  -2  174.48   18.50
  -1  -5   2  179.78   21.10
  -1  -5   2  182.08   16.20
  -1   5  -2  172.38   20.00
  -1   5  -2  181.08   20.30
  -1  -5   2  206.28   20.40
  -1  -5   2  163.98   18.00
  -1   5  -2  188.48   24.30
  -1  -5   2  184.18   18.50
  -1   5  -2  151.88   21.30
  -1  -5   2  180.98   18.70
   1  -5   2  170.28   19.40
   1   5  -2  180.28   20.60
   1   5  -2  173.48   18.30
   1  -5   2  175.18   19.30
   1  -5   2  185.48   21.10
   1  -5   2  170.68   19.50
   1   5  -2  175.88   17.40
   1   5  -2  161.08   18.70
   1  -5   2  156.78   15.60
   1   5  -2  169.98   16.80
   1  -5   2  173.28   23.30
  -1  -5   1  647.04   33.70
  -1  -5   1  641.44   32.40
  -1   5  -1  626.54   33.90
  -1  -5   1  651.43   36.00
  -1   5  -1  638.94   38.90
  -1   5  -1  623.94   35.00
  -1  -5   1  618.64   34.00
  -1   5  -1  664.13   36.30
  -1   5  -1  608.14   29.00
  -1  -5   1  670.73   28.00
  -1  -5   1  628.84   32.70
   1  -5   1  638.04   36.40
   1  -5   1  634.54   35.90
   1  -5   1  641.14   29.10
   1   5  -1  691.43   34.10
   1   5  -1  746.03   41.00
   1  -5   1  652.13   34.80
   1  -5   1  649.04   35.20
   1  -5   1  658.93   37.00
   1   5  -1  619.64   33.30
  -1  -5   0  950.10   39.80
  -1  -5   0  927.61   41.20
  -1   5   0  942.51   44.30
  -1   5   0  922.41   45.10
  -1  -5   0  938.81   39.00
  -1  -5   0  880.01   43.30
  -1  -5   0  903.71   39.00
  -1   5   0  907.51   40.60
  -1   5   0  924.21   42.80
  -1   5   0  931.41   43.00
   1   5   0  921.21   43.50
   1   5   0  919.51   41.00
   1  -5   0  917.41   43.10
   1  -5   0  944.01   43.00
   1   5   0  905.31   39.10
   1  -5   0  952.00   45.60
   1   5   0  935.81   37.00
   1   5   0  956.30   38.90
   1  -5   0  891.91   43.90
  -1   5   1  694.63   36.00
  -1   5   1  688.93   37.40
  -1  -5  -1  666.23   36.60
  -1  -5  -1  657.43   36.80
  -1  -5  -1  654.33   33.90
  -1   5   1  738.33   36.60
  -1  -5  -1  658.13   33.90
   1   5   1  659.43   36.90
   1   5   1  609.94   32.50
   1  -5  -1  576.04   36.20
   1  -5  -1  650.53   38.40
   1   5   1  671.23   36.20
   1  -5  -1  668.73   38.40
   1  -5  -1  638.14   34.90
   1  -5  -1  620.24   35.00
  -1  -5  -2  151.48   22.80
  -1  -5  -2  179.88   24.80
  -1  -5  -2  181.58   19.70
  -1   5   2  211.18   21.00
  -1   5   2  184.98   22.20
  -1   5   2  187.38   19.80
  -1  -5  -2  168.98   25.70
  -1  -5  -2  209.48   20.30
  -1   5   2  178.38   20.10
  -1   5   2  159.98   19.20
   1   5   2  172.18   18.90
   1   5   2  183.48   25.40
   1   5   2  188.98   19.50
   1  -5  -2  176.88   24.80
   1  -5  -2  181.08   26.10
   1  -5  -2  216.58   28.90
   1  -5  -2  181.28   20.00
   1  -5  -2  168.88   19.60
   1   5   2  179.98   21.40
   1   5   2  159.48   17.90
  -1  -5  -3  388.96   36.40
  -1   5   3  377.16   37.40
  -1  -5  -3  324.47   31.90
  -1  -5  -3  377.36   33.70
  -1   5   3  370.56   34.30
  -1  -5  -3  343.27   32.80
  -1   5   3  334.37   33.50
  -1   5   3  351.76   32.90
  -1   5   3  418.26   36.90
  -1  -5  -3  330.77   36.10
   1  -5  -3  396.66   34.50
   1   5   3  328.07   32.40
   1   5   3  352.16   34.70
   1  -5  -3  317.17   31.60
   1   5   3  386.66   42.30
   1   5   3  300.17   30.50
   1  -5  -3  378.46   37.30
   1  -5  -3  351.26   38.00
   1   5   3  378.76   34.20
   1  -5  -3  357.66   36.60
   1   5   3  370.16   33.10
  -1  -5  -4  341.57   37.30
  -1  -5  -4  342.57   47.70
  -1  -5  -4  311.57   37.00
  -1  -5  -4  353.76   39.10
  -1   5   4  340.57   37.50
  -1   5   4  337.27   37.50
  -1   5   4  302.17   42.00
  -1  -5  -4  307.27   46.80
   1   5   4  329.87   37.20
   1   5   4  364.96   38.90
   1  -5  -4  333.37   42.80
   1  -5  -4  329.97   47.80
   1  -5  -4  295.27   44.20
  -1   5   5  191.58   38.00
  -1  -5  -5  250.47   47.20
  -1  -5  -5  267.37   45.20
  -1   5   5  197.18   40.50
  -1  -5  -5  212.38   41.60
   1   5   5  158.48   36.50
   1  -5  -5  225.48   38.60
   1  -5  -5  182.98   41.60
   1   5   5  236.88   41.20
   1  -5  -5  226.68   43.50
  -1   5   6   58.29   33.10
  -1  -5  -6    7.80   27.20
  -1  -5  -6    2.30   21.90
   1  -5  -6    7.30   21.50
   1  -5  -6  -19.70   26.90
   1   5   6   16.40   22.30
   1   5   6   -7.20   21.40
  -2   5  -6   58.19   33.30
  -2  -5   6   47.60   28.60
  -2   5  -6   88.59   37.00
  -2  -5   6   84.39   40.90
  -2   5  -6  103.59   31.20
   2   5  -6    0.70   27.50
   2   5  -6   57.89   33.60
   2   5  -6   35.40   35.20
   2  -5   6  114.39   39.20
   2  -5   6   60.39   34.20
  -2  -5   5  184.48   39.00
  -2  -5   5  192.38   39.60
  -2   5  -5  185.38   37.10
  -2   5  -5  154.78   35.20
   2   5  -5  188.68   42.50
   2  -5   5  257.97   44.40
   2   5  -5  180.98   38.40
   2  -5   5  158.58   34.70
   2   5  -5  161.78   33.70
  -2  -5   4   52.89   20.00
  -2  -5   4   87.09   23.30
  -2   5  -4   31.90   20.40
  -2  -5   4   50.29   22.60
  -2   5  -4   88.59   28.20
  -2   5  -4   45.30   17.90
   2  -5   4   83.09   19.60
   2   5  -4   49.99   18.60
   2   5  -4   74.29   18.80
   2   5  -4  101.79   28.10
   2  -5   4  104.69   26.70
  -2   5  -3  467.35   41.00
  -2   5  -3  500.45   41.60
  -2   5  -3  470.05   38.20
  -2  -5   3  485.45   40.40
  -2   5  -3  445.76   38.40
  -2  -5   3  431.36   37.20
  -2  -5   3  466.25   34.80
  -2  -5   3  484.45   35.80
  -2   5  -3  555.14   40.30
  -2   5  -3  479.65   36.80
   2   5  -3  468.25   36.50
   2  -5   3  597.24   38.20
   2  -5   3  545.75   43.30
   2   5  -3  554.24   41.00
   2   5  -3  537.15   41.40
   2  -5   3  562.04   43.10
   2  -5   3  570.84   42.10
   2  -5   3  565.04   41.50
   2   5  -3  569.34   39.30
   2   5  -3  575.64   36.50
   2   5  -3  579.44   40.70
   2  -5   3  491.45   41.30
   2   5  -3  500.05   42.80
  -2   5  -2 1184.28   62.69
  -2  -5   2 1187.38   61.49
  -2  -5   2 1162.68   55.59
  -2   5  -2 1146.69   61.29
  -2   5  -2 1085.99   58.99
  -2  -5   2 1155.58   54.29
  -2   5  -2 1149.58   60.19
  -2  -5   2 1230.48   58.79
  -2   5  -2 1145.39   58.89
  -2   5  -2 1160.88   55.39
   2   5  -2 1059.49   55.99
   2  -5   2 1123.59   59.49
   2   5  -2 1104.99   57.89
   2  -5   2 1181.28   61.79
   2   5  -2 1102.29   55.49
   2   5  -2 1099.69   54.89
   2  -5   2 1113.99   61.19
   2   5  -2 1064.39   57.89
   2  -5   2 1143.99   60.39
   2  -5   2 1082.89   61.59
   2   5  -2 1033.00   59.89
   2   5  -2 1138.09   59.89
  -2   5  -1  399.56   25.30
  -2   5  -1  372.96   26.80
  -2  -5   1  417.26   25.90
  -2  -5   1  380.16   20.10
  -2  -5   1  382.36   21.30
  -2  -5   1  374.56   21.20
  -2  -5   1  354.96   22.40
  -2   5  -1  386.76   26.50
  -2   5  -1  419.36   26.60
  -2  -5   1  394.26   22.20
  -2   5  -1  394.06   28.20
  -2   5  -1  411.16   22.00
   2  -5   1  368.36   26.60
   2  -5   1  350.06   24.90
   2   5  -1  352.46   27.60
   2   5  -1  357.56   21.70
   2  -5   1  371.46   25.70
   2   5  -1  349.17   20.10
   2   5  -1  346.37   21.90
   2  -5   1  373.56   25.30
   2  -5   1  327.77   26.20
  -2  -5   0  475.45   22.00
  -2   5   0  455.45   27.50
  -2   5   0  479.35   29.10
  -2  -5   0  460.15   18.90
  -2   5   0  491.65   27.40
  -2  -5   0  465.25   23.60
  -2  -5   0  480.35   21.10
  -2   5   0  463.25   26.00
  -2  -5   0  466.45   26.50
  -2   5   0  443.96   26.60
   2  -5   0  459.95   27.10
   2   5   0  477.25   20.70
   2  -5   0  448.76   29.30
   2   5   0  464.55   23.30
   2  -5   0  491.35   27.50
   2   5   0  446.46   21.60
   2  -5   0  462.45   27.60
  -2   5   1  408.26   26.40
  -2   5   1  353.76   23.20
  -2  -5  -1  346.87   22.30
  -2  -5  -1  370.96   25.70
  -2   5   1  362.76   25.30
  -2   5   1  347.57   31.50
  -2  -5  -1  361.76   22.60
   2   5   1  389.56   22.80
   2   5   1  397.06   21.50
   2  -5  -1  392.66   28.80
   2  -5  -1  400.16   27.40
   2  -5  -1  383.96   24.20
   2   5   1  399.36   25.90
   2  -5  -1  377.26   25.60
   2  -5  -1  413.66   26.40
   2   5   1  387.16   21.90
  -2   5   2 1041.20   63.29
  -2  -5  -2 1140.89   59.59
  -2   5   2 1097.89   59.59
  -2   5   2 1073.69   59.59
  -2   5   2 1133.79   62.29
  -2  -5  -2 1134.79   63.19
  -2  -5  -2 1109.59   58.39
  -2  -5  -2 1134.49   62.19
  -2  -5  -2 1097.59   60.89
   2  -5  -2 1182.58   61.79
   2  -5  -2 1191.98   66.29
   2   5   2 1197.88   58.19
   2   5   2 1213.78   59.29
   2  -5  -2 1140.19   60.59
   2  -5  -2 1122.99   63.59
   2   5   2 1149.29   63.09
   2   5   2 1130.39   61.39
   2   5   2 1178.38   58.79
   2  -5  -2 1096.69   59.59
  -2  -5  -3  496.35   39.50
  -2   5   3  524.45   41.70
  -2  -5  -3  514.05   40.30
  -2   5   3  530.75   40.70
  -2  -5  -3  533.55   41.80
  -2  -5  -3  522.55   41.20
  -2  -5  -3  579.94   43.00
  -2   5   3  562.24   43.50
  -2   5   3  608.74   47.80
   2  -5  -3  457.35   44.60
   2  -5  -3  500.45   40.80
   2   5   3  490.75   41.10
   2   5   3  495.65   40.10
   2   5   3  508.75   39.30
   2   5   3  484.25   46.60
   2  -5  -3  540.05   41.20
  -2  -5  -4   46.60   20.20
  -2   5   4   41.90   20.30
  -2  -5  -4   47.70   19.70
  -2   5   4   81.29   24.30
  -2  -5  -4   81.89   21.70
  -2  -5  -4  108.59   28.40
  -2   5   4   58.09   22.10
  -2  -5  -4   54.29   23.70
   2   5   4   74.89   23.50
   2   5   4   72.49   24.30
   2  -5  -4   50.39   20.10
   2  -5  -4   71.69   23.70
   2  -5  -4   72.59   27.00
   2  -5  -4   42.00   20.60
  -2  -5  -5  128.39   34.30
  -2  -5  -5  172.38   35.60
  -2  -5  -5  162.28   41.70
  -2   5   5  156.68   34.40
  -2  -5  -5  183.58   38.70
  -2   5   5  234.08   41.50
   2   5   5   96.89   29.00
   2  -5  -5  185.88   41.70
   2  -5  -5   92.19   34.40
   2  -5  -5  151.68   34.50
   2   5   5  188.08   37.10
  -2   5   6   72.29   35.90
  -2  -5  -6   84.99   33.10
  -2   5   6  100.39   35.40
   2   5   6   79.39   30.60
   2   5   6   14.60   28.10
   2  -5  -6   67.19   35.60
   2  -5  -6   72.29   32.20
  -3   5  -6  -20.80   26.60
  -3  -5   6   -8.40   22.60
  -3  -5   6  -22.20   25.10
  -3   5  -6  -39.20   24.00
  -3   5  -6   17.70   30.70
   3   5  -6  -15.80   26.40
   3   5  -6  -13.50   28.60
   3  -5   6   31.50   28.50
   3  -5   6  -11.40   17.90
   3   5  -6   44.90   34.40
  -3  -5   5   86.69   31.20
  -3   5  -5  102.69   30.50
  -3   5  -5   70.59   34.00
  -3   5  -5  143.39   33.10
  -3  -5   5   75.09   26.80
   3   5  -5   70.29   25.80
   3  -5   5   61.09   27.40
   3   5  -5   75.79   28.50
   3   5  -5  108.59   31.10
   3  -5   5   94.19   28.30
   3   5  -5   57.19   23.00
  -3  -5   4  932.71   67.09
  -3   5  -4  880.91   62.09
  -3  -5   4  838.92   65.89
  -3   5  -4  941.11   63.99
  -3  -5   4  941.51   61.09
  -3   5  -4  997.10   76.59
  -3   5  -4 1025.30   69.39
   3  -5   4  893.51   67.99
   3  -5   4  947.51   61.89
   3   5  -4  997.30   64.19
   3   5  -4 1000.90   72.39
   3   5  -4  997.70   75.19
   3   5  -4 1019.10   57.49
  -3   5  -3  125.89   21.80
  -3   5  -3  132.59   25.20
  -3   5  -3   90.99   25.80
  -3  -5   3  146.79   22.40
  -3  -5   3  131.19   25.60
  -3   5  -3  144.59   24.90
  -3  -5   3  115.89   21.90
  -3   5  -3  153.28   25.30
  -3   5  -3  107.99   20.90
  -3  -5   3  116.59   18.70
  -3  -5   3  132.69   23.10
   3  -5   3  132.99   21.70
   3   5  -3  147.89   24.90
   3  -5   3  136.09   27.80
   3  -5   3  166.18   29.00
   3   5  -3  134.89   24.10
   3   5  -3  167.78   24.40
   3  -5   3  157.58   28.10
   3   5  -3  134.59   27.10
   3   5  -3  139.89   21.30
   3   5  -3  132.49   18.70
   3  -5   3  111.89   22.20
   3   5  -3  127.99   22.80
  -3   5  -2   81.79   18.40
  -3   5  -2   98.59   19.20
  -3   5  -2  103.39   19.10
  -3   5  -2  125.19   17.90
  -3  -5   2  112.69   19.50
  -3   5  -2  115.39   18.40
  -3   5  -2   93.69   17.40
  -3  -5   2   82.99   13.60
   3   5  -2   90.89   15.10
   3  -5   2  127.29   21.90
   3  -5   2   94.09   17.60
   3   5  -2  122.19   19.10
   3   5  -2  105.29   14.00
   3  -5   2  112.19   19.50
   3  -5   2   91.09   17.50
   3   5  -2  102.19   16.50
   3   5  -2  114.69   16.20
   3   5  -2  102.69   18.50
   3  -5   2  125.89   21.70
   3  -5   2  118.39   17.10
  -3  -5   1  448.46   24.10
  -3   5  -1  419.66   27.40
  -3  -5   1  431.76   23.90
  -3   5  -1  420.46   29.30
  -3   5  -1  418.16   25.10
  -3   5  -1  401.66   28.20
  -3   5  -1  417.36   28.20
  -3  -5   1  392.36   26.50
  -3   5  -1  384.56   29.00
   3  -5   1  411.66   27.60
   3   5  -1  378.36   22.60
   3  -5   1  373.46   26.10
   3  -5   1  431.26   30.00
   3   5  -1  432.06   22.70
   3   5  -1  385.86   21.10
   3   5  -1  380.26   20.60
   3  -5   1  392.26   27.20
   3  -5   1  366.16   29.10
  -3  -5   0 1296.47   58.69
  -3   5   0 1312.37   59.89
  -3  -5   0 1298.97   50.39
  -3   5   0 1341.97   61.19
  -3   5   0 1310.27   60.99
  -3  -5   0 1329.37   50.39
  -3   5   0 1301.07   63.69
  -3  -5   0 1313.57   57.09
   3  -5   0 1339.07   60.79
   3  -5   0 1325.37   60.99
   3  -5   0 1350.46   64.49
   3   5   0 1294.87   50.29
   3  -5   0 1303.47   57.59
  -3   5   1  410.46   29.30
  -3   5   1  388.86   30.20
  -3   5   1  391.06   27.60
  -3   5   1  406.56   24.90
  -3  -5  -1  379.56   23.70
  -3  -5  -1  396.26   23.60
  -3  -5  -1  407.46   23.80
  -3  -5  -1  358.76   25.20
  -3   5   1  415.06   28.30
  -3  -5  -1  413.86   30.80
  -3  -5  -1  397.46   27.30
   3   5   1  411.56   20.90
   3  -5  -1  422.96   25.50
   3  -5  -1  404.86   26.50
   3   5   1  426.76   27.40
   3  -5  -1  402.26   27.50
   3   5   1  473.65   27.60
   3  -5  -1  453.05   31.00
   3  -5  -1  453.45   31.00
   3  -5  -1  441.36   28.30
   3   5   1  431.66   20.90
  -3  -5  -2   91.79   17.80
  -3  -5  -2  121.99   18.80
  -3  -5  -2   82.49   18.60
  -3  -5  -2  104.89   18.60
  -3  -5  -2  134.79   19.70
  -3   5   2   87.59   19.30
  -3  -5  -2   82.19   15.60
  -3  -5  -2  114.39   20.10
  -3   5   2   91.99   19.10
  -3   5   2  112.59   19.50
  -3   5   2   82.79   16.90
   3   5   2   96.89   19.30
   3   5   2   90.59   15.60
   3  -5  -2   79.29   18.60
   3  -5  -2   81.89   17.10
   3  -5  -2  104.29   19.40
   3   5   2  108.49   17.80
   3  -5  -2   97.99   20.70
   3  -5  -2  101.59   18.50
   3  -5  -2   96.09   15.30
  -3   5   3  119.89   22.70
  -3  -5  -3  139.99   23.70
  -3   5   3  112.19   23.80
  -3   5   3  176.98   30.20
  -3   5   3  107.59   22.70
  -3  -5  -3  150.48   24.90
  -3  -5  -3  157.18   29.40
  -3   5   3  135.79   25.70
  -3  -5  -3  133.79   23.60
  -3  -5  -3  162.38   27.30
  -3  -5  -3  151.08   28.40
   3   5   3  162.28   26.90
   3  -5  -3  146.99   25.70
   3  -5  -3  112.99   27.00
   3   5   3  121.29   23.50
   3   5   3  135.69   22.70
   3  -5  -3  167.68   26.60
   3  -5  -3  163.78   30.60
  -3  -5  -4  987.00   65.29
  -3  -5  -4 1050.29   75.99
  -3  -5  -4 1004.50   67.39
  -3  -5  -4  997.70   71.89
  -3  -5  -4  924.81   66.39
  -3   5   4 1040.00   70.59
  -3   5   4 1008.10   68.59
  -3   5   4  841.82   73.09
   3  -5  -4  973.70   74.19
   3  -5  -4 1055.59   77.29
   3  -5  -4  993.00   67.89
   3   5   4  892.01   63.69
   3  -5  -4  881.21   59.69
   3   5   4  999.80   70.79
  -3  -5  -5   94.49   26.40
  -3  -5  -5   63.79   30.50
  -3  -5  -5   61.89   29.20
  -3   5   5  160.18   36.70
  -3  -5  -5  114.89   33.60
  -3   5   5   65.79   28.30
   3  -5  -5  132.49   32.90
   3  -5  -5  127.39   35.40
   3   5   5   82.89   29.10
   3  -5  -5   94.59   35.90
   3   5   5  140.59   32.80
  -3  -5  -6   -5.70   22.60
  -3  -5  -6   -6.20   27.90
  -3   5   6   26.70   29.10
  -3   5   6  -35.00   20.10
  -3  -5  -6   31.60   28.30
   3  -5  -6   28.60   34.80
   3  -5  -6   16.00   27.70
   3   5   6   14.00   24.80
   3  -5  -6   45.20   34.30
  -4   5  -6  203.68   46.30
  -4  -5   6  136.79   38.40
  -4   5  -6  216.08   53.19
  -4  -5   6  106.79   35.90
  -4   5  -6  148.59   34.50
   4  -5   6  152.58   42.50
   4   5  -6  126.29   44.70
   4   5  -6  240.28   46.80
   4  -5   6  147.39   42.80
   4   5  -6  176.78   44.20
  -4   5  -5   42.30   27.30
  -4   5  -5   -0.10   20.30
  -4  -5   5  -10.50   17.00
  -4  -5   5  -17.50   17.30
  -4   5  -5   -3.70   23.60
   4   5  -5  -10.20   20.90
   4  -5   5  -11.20   16.80
   4   5  -5  -37.00   16.50
   4  -5   5    2.30   20.10
   4   5  -5   26.60   18.40
   4   5  -5    4.00   16.50
  -4   5  -4  128.49   27.60
  -4  -5   4   76.89   24.40
  -4  -5   4   68.19   24.40
  -4   5  -4   95.49   23.40
  -4  -5   4   97.79   23.60
  -4   5  -4   96.09   31.80
   4   5  -4   77.19   22.80
   4  -5   4   79.29   25.10
   4   5  -4  118.69   35.70
   4  -5   4   83.59   23.10
   4   5  -4   59.39   20.30
   4  -5   4   83.89   27.70
   4   5  -4   93.09   18.00
  -4  -5   3  546.85   34.30
  -4  -5   3  537.85   43.30
  -4   5  -3  508.35   40.60
  -4   5  -3  557.84   44.30
  -4  -5   3  536.35   41.70
  -4  -5   3  541.35   39.10
  -4   5  -3  523.95   42.90
  -4   5  -3  578.54   40.90
  -4   5  -3  536.05   44.00
  -4   5  -3  516.75   40.10
   4  -5   3  524.35   45.40
   4   5  -3  473.95   39.70
   4  -5   3  475.15   37.00
   4   5  -3  579.24   41.50
   4   5  -3  574.24   43.90
   4  -5   3  476.25   41.00
   4  -5   3  525.65   42.80
   4   5  -3  522.55   32.30
   4   5  -3  509.45   40.00
   4   5  -3  571.74   44.70
   4   5  -3  476.85   36.20
   4   5  -2   53.29   12.40
   4   5  -2   48.40    9.20
   4   5  -2   43.80   13.40
   4   5  -2   55.19   12.00
   4  -5   2   43.70   15.00
   4  -5   2   72.19   16.50
   4  -5   2   28.80   11.20
   4  -5   2   46.80   13.50
   4  -5   2   44.00   11.80
   4   5  -2   65.39   11.90
   4   5  -2   40.10   12.80
  -4   5  -1  979.10   46.40
  -4   5  -1  955.90   49.20
  -4  -5   1  943.31   46.00
  -4   5  -1  930.01   51.39
  -4   5  -1  913.31   47.60
  -4   5  -1  934.91   49.20
  -4  -5   1  951.40   41.30
  -4   5  -1  885.21   48.40
   4  -5   1  848.42   50.29
   4   5  -1  823.02   40.10
   4   5  -1  815.52   37.60
   4  -5   1  847.82   44.90
   4  -5   1  843.52   47.10
   4  -5   1  873.01   47.50
   4   5  -1  822.82   39.00
   4   5  -1  811.32   37.80
   4  -5   1  847.22   49.20
  -4   5   0   17.50    8.20
  -4  -5   0   26.30    8.30
  -4   5   0    5.40    7.40
  -4   5   0   21.20    8.30
  -4   5   0   24.80   11.40
   4  -5   0    5.20    7.00
   4  -5   0   31.80    9.60
   4  -5   0    9.30    9.20
   4  -5   0   23.40    7.00
   4  -5   0   30.10    9.30
  -4  -5  -1  811.52   41.70
  -4  -5  -1  843.52   41.40
  -4   5   1  857.41   47.40
  -4   5   1  852.11   42.80
  -4   5   1  789.52   48.40
  -4  -5  -1  841.42   41.10
  -4  -5  -1  807.92   45.10
  -4   5   1  786.82   46.20
  -4  -5  -1  835.82   41.60
  -4  -5  -1  818.42   43.40
  -4  -5  -1  850.81   47.40
  -4  -5  -1  850.51   41.40
  -4   5   1  831.62   50.39
   4  -5  -1  945.31   45.10
   4   5   1  947.41   34.90
   4  -5  -1  994.90   48.90
   4  -5  -1  949.31   52.39
   4  -5  -1  975.50   44.10
   4  -5  -1  957.60   48.10
   4   5   1  966.50   48.30
  -4   5   2   81.79   19.60
  -4  -5  -2   41.00   12.60
  -4  -5  -2   68.19   17.00
  -4  -5  -2   54.09   13.70
  -4  -5  -2   52.59   12.80
  -4  -5  -2   51.79   15.80
  -4  -5  -2   59.29   13.90
  -4  -5  -2   20.00   11.40
  -4   5   2   64.39   15.00
  -4  -5  -2   80.39   15.60
  -4   5   2   46.10   16.40
  -4  -5  -3  533.45   44.90
  -4   5   3  553.74   43.50
  -4   5   3  489.95   40.70
  -4  -5  -3  489.35   40.50
  -4  -5  -3  457.95   42.90
  -4   5   3  443.96   41.90
  -4   5   3  562.24   47.70
  -4  -5  -3  503.65   41.70
  -4  -5  -3  513.95   41.50
  -4   5   3  517.35   41.80
  -4  -5  -3  541.75   40.00
   4  -5  -3  598.64   44.10
   4   5   3  582.24   50.99
   4  -5  -3  514.35   46.50
   4   5   3  593.84   44.70
   4   5   3  501.95   38.30
   4  -5  -3  596.14   49.30
   4  -5  -3  534.15   35.00
   4  -5  -3  513.35   42.10
   4   5   3  497.05   39.50
  -4  -5  -4   58.69   25.10
  -4   5   4   80.49   23.70
  -4   5   4  131.69   29.10
  -4  -5  -4   97.69   25.50
  -4   5   4   89.19   24.00
  -4  -5  -4   64.69   25.80
  -4  -5  -4  112.59   24.70
  -4  -5  -4   91.79   25.70
   4  -5  -4  107.09   30.50
   4  -5  -4  124.69   23.80
   4  -5  -4   86.69   29.10
   4   5   4   85.89   25.50
   4   5   4   88.89   22.60
   4  -5  -4   95.39   24.90
  -4   5   5    3.60   19.20
  -4  -5  -5   -3.40   18.20
  -4  -5  -5   10.10   17.60
  -4  -5  -5    6.40   17.40
  -4   5   5    7.20   18.20
  -4  -5  -5   -8.90   17.80
   4   5   5   -6.80   18.10
   4   5   5    4.60   13.80
   4  -5  -5    3.00   21.60
   4  -5  -5  -23.40   19.90
   4  -5  -5   37.60   26.90
   4  -5  -5    1.00   21.20
  -4   5   6  153.58   40.60
  -4   5   6  200.08   43.80
  -4  -5  -6  162.78   40.60
  -4  -5  -6  145.89   44.30
  -4  -5  -6  188.68   44.30
   4  -5  -6  156.68   33.40
   4   5   6  216.08   47.40
   4  -5  -6  214.78   52.89
   4   5   6  211.88   44.90
   4  -5  -6  205.48   46.70
  -5   5  -5  238.58   43.10
  -5  -5   5  139.29   36.40
  -5  -5   5  165.58   36.50
  -5   5  -5  133.29   40.00
  -5   5  -5  190.08   38.80
   5   5  -5  199.38   37.60
   5   5  -5  169.78   25.90
   5  -5   5  156.08   35.80
   5  -5   5  162.38   39.70
   5   5  -5  156.18   40.70
   5   5  -5  169.08   38.60
  -5   5  -4  446.66   42.30
  -5   5  -4  383.46   40.80
  -5  -5   4  411.26   43.70
  -5  -5   4  399.36   42.40
  -5   5  -4  419.36   44.40
  -5  -5   4  399.16   37.80
   5   5  -4  362.86   39.50
   5   5  -4  377.96   38.20
   5   5  -4  394.16   29.80
   5   5  -4  399.36   43.50
   5  -5   4  386.36   43.40
   5  -5   4  395.46   43.30
   5  -5   4  431.46   46.40
  -5  -5   3  456.25   39.70
  -5   5  -3  408.76   39.80
  -5   5  -3  384.46   35.70
  -5   5  -3  374.26   38.10
  -5   5  -3  400.46   35.60
  -5  -5   3  372.26   33.60
  -5   5  -3  395.46   36.80
  -5   5  -3  374.86   39.00
  -5  -5   3  423.76   36.30
   5  -5   3  468.15   36.10
   5   5  -3  447.36   33.80
   5   5  -3  442.16   35.00
   5   5  -3  512.15   37.80
   5  -5   3  416.46   41.40
   5  -5   3  480.55   40.80
   5  -5   3  471.15   48.20
   5   5  -3  467.55   37.90
   5   5  -3  475.05   40.20
   5  -5   3  428.36   38.20
   5   5  -3  448.56   27.10
  -5   5  -2  146.59   24.10
  -5  -5   2  160.48   22.90
  -5  -5   2  132.99   20.90
  -5  -5   2  143.19   13.20
  -5   5  -2  191.98   28.10
  -5   5  -2  110.79   19.20
  -5   5  -2  171.68   23.70
  -5   5  -2  145.19   23.90
  -5   5  -2  143.19   21.70
   5   5  -2  156.28   21.60
   5  -5   2  162.98   26.10
   5   5  -2  153.48   16.30
   5   5  -2  137.59   21.10
   5  -5   2  153.78   25.70
   5  -5   2  177.18   24.40
   5   5  -2  141.09   16.30
   5   5  -2  137.49   15.20
   5   5  -2  157.48   12.80
   5  -5   2  171.08   24.70
   5  -5   2  174.48   25.70
  -5  -5   1  380.26   21.60
  -5  -5   1  358.66   24.90
  -5   5  -1  390.46   28.60
  -5   5  -1  354.56   30.50
  -5   5  -1  389.66   28.20
  -5   5  -1  351.86   27.00
  -5   5  -1  366.76   28.60
  -5   5  -1  423.06   30.60
   5  -5   1  352.66   29.90
   5   5  -1  369.06   18.60
   5  -5   1  364.36   31.00
   5  -5   1  326.67   27.20
   5   5  -1  346.27   20.50
   5  -5   1  379.36   25.80
   5   5  -1  372.26   18.70
   5  -5   1  339.97   27.20
  -5   5   0 1350.76   62.99
  -5  -5   0 1379.76   63.29
  -5   5   0 1316.77   68.49
  -5  -5   0 1363.36   50.79
  -5   5   0 1318.37   64.99
  -5   5   0 1329.37   65.29
   5  -5   0 1264.57   63.09
   5  -5   0 1335.97   63.69
   5  -5   0 1391.26   69.49
   5  -5   0 1324.47   58.19
   5  -5   0 1306.67   64.49
  -5   5   1  342.27   27.30
  -5   5   1  369.46   28.40
  -5  -5  -1  385.86   23.10
  -5   5   1  356.86   30.90
  -5  -5  -1  355.26   22.20
  -5   5   1  397.36   24.40
  -5   5   1  406.86   32.20
  -5  -5  -1  373.06   26.20
  -5  -5  -1  368.26   23.50
  -5  -5  -1  360.16   28.70
  -5  -5  -1  353.96   24.50
  -5  -5  -1  365.56   22.80
  -5  -5  -1  363.36   22.60
   5  -5  -1  341.17   30.40
   5  -5  -1  355.96   27.70
   5   5   1  389.76   28.60
   5  -5  -1  396.66   24.90
   5  -5  -1  385.06   24.50
   5  -5  -1  373.86   28.20
  -5  -5  -2  155.88   23.40
  -5  -5  -2  160.68   24.00
  -5  -5  -2  147.49   17.60
  -5   5   2  137.79   25.30
  -5  -5  -2  170.08   26.60
  -5  -5  -2  160.68   18.90
  -5   5   2  170.38   28.30
  -5   5   2  190.98   27.00
  -5   5   2  155.38   25.80
  -5  -5  -2  161.38   23.20
  -5  -5  -2  191.98   25.00
   5  -5  -2  165.08   16.20
   5  -5  -2  143.79   25.70
   5   5   2  178.48   18.40
   5  -5  -2  165.18   25.60
   5  -5  -2  156.38   27.00
   5  -5  -2  141.99   22.50
   5   5   2  152.18   16.50
   5   5   2  144.19   24.10
   5  -5  -2  142.09   20.90
  -5  -5  -3  501.65   43.70
  -5  -5  -3  501.45   38.20
  -5   5   3  505.45   40.50
  -5  -5  -3  486.35   39.40
  -5   5   3  488.15   42.60
  -5   5   3  486.85   40.80
  -5  -5  -3  483.55   40.10
  -5  -5  -3  427.66   41.20
  -5   5   3  470.75   39.00
  -5  -5  -3  447.56   42.60
  -5  -5  -3  458.55   38.40
  -5   5   3  439.46   42.90
   5  -5  -3  422.96   39.50
   5   5   3  434.06   39.90
   5   5   3  451.55   41.10
   5  -5  -3  459.75   45.00
   5   5   3  395.96   33.70
   5   5   3  446.86   35.90
   5  -5  -3  461.85   43.10
   5  -5  -3  400.56   29.70
   5  -5  -3  385.16   37.10
  -5  -5  -4  357.36   42.00
  -5  -5  -4  397.86   41.50
  -5  -5  -4  390.16   39.70
  -5   5   4  419.76   44.80
  -5  -5  -4  441.16   47.20
  -5   5   4  450.15   44.40
  -5  -5  -4  436.16   48.10
  -5   5   4  426.36   43.80
   5  -5  -4  456.35   37.20
   5  -5  -4  495.15   37.50
   5  -5  -4  353.66   52.89
   5   5   4  449.86   46.10
   5   5   4  397.66   40.00
   5  -5  -4  400.86   44.10
   5  -5  -4  465.95   51.49
  -5  -5  -5  163.78   40.20
  -5   5   5  224.38   41.90
  -5  -5  -5  145.29   41.50
  -5   5   5  158.78   35.10
  -5  -5  -5  201.78   39.50
   5  -5  -5  119.09   35.00
   5   5   5  170.28   36.20
   5  -5  -5  175.68   30.00
   5   5   5  219.88   40.00
   5  -5  -5  118.09   32.10
   5  -5  -5  210.98   47.20
   5  -5  -5  135.49   25.10
  -6  -5   5   33.80   23.50
  -6  -5   5   12.80   20.50
  -6   5  -5   50.99   29.00
  -6   5  -5   15.90   24.70
  -6   5  -5   16.50   25.30
   6   5  -5   13.90   16.20
   6  -5   5   50.19   26.00
   6  -5   5   50.99   26.80
   6   5  -5   80.49   33.00
   6   5  -5   40.30   21.10
  -6  -5   4   30.50   19.50
  -6   5  -4   52.19   21.20
  -6  -5   4   48.10   20.10
  -6   5  -4   40.10   21.50
   6   5  -4   20.50   17.10
   6  -5   4   72.09   28.80
   6   5  -4    4.90   19.10
   6  -5   4   43.10   20.00
   6  -5   4   60.79   23.90
   6   5  -4   19.80   11.20
  -6  -5   3   40.80   16.80
  -6   5  -3   56.09   18.20
  -6   5  -3   46.10   16.10
  -6  -5   3   31.80   13.90
  -6   5  -3   23.40   17.70
  -6   5  -3   44.90   18.30
  -6   5  -3   33.40   16.80
  -6  -5   3   53.69   16.50
   6   5  -3   53.09    9.30
   6  -5   3   34.10   18.30
   6   5  -3   32.30   13.30
   6  -5   3   40.80   18.10
   6  -5   3   63.39   15.10
   6   5  -3   15.90   16.70
   6  -5   3   31.20   16.30
   6   5  -3   23.10   12.10
   6  -5   3   36.70   18.70
  -6  -5   2 1329.57   66.59
  -6   5  -2 1385.26   70.19
  -6  -5   2 1340.77   68.19
  -6   5  -2 1351.66   66.09
  -6  -5   2 1352.46   53.59
  -6   5  -2 1433.16   73.79
  -6   5  -2 1369.06   73.49
  -6  -5   2 1414.46   64.49
  -6   5  -2 1437.66   75.19
  -6   5  -2 1355.16   69.59
   6  -5   2 1190.88   68.39
   6   5  -2 1090.89   58.19
   6  -5   2 1212.38   66.19
   6  -5   2 1162.98   67.49
   6   5  -2 1173.68   59.19
   6   5  -2 1159.68   63.39
   6   5  -2 1173.58   63.59
   6  -5   2 1269.87   73.19
   6   5  -2 1121.79   60.39
   6  -5   2 1154.78   71.49
  -6  -5   1   25.80    6.80
  -6   5  -1   44.00   12.70
  -6   5  -1   33.10   11.80
  -6  -5   1   38.40    6.70
  -6  -5   1   46.20   10.40
  -6   5  -1   18.90    9.90
  -6  -5   1   34.20    7.70
  -6   5  -1   64.59   15.30
  -6   5  -1   45.00   13.90
  -6   5  -1   52.09   12.50
   6  -5   1   45.20   12.20
   6  -5   1   53.09   16.00
   6   5  -1   46.60    6.40
   6  -5   1   67.69   16.60
   6   5  -1   39.60    6.00
   6  -5   1   46.00   12.80
   6   5  -1   36.40    7.30
   6  -5   1   49.00   11.40
  -6   5   0    2.30    6.30
  -6  -5   0    2.20    7.40
  -6   5   0    4.00    8.00
  -6   5   0    4.40    7.10
  -6  -5   0   13.90    3.30
  -6   5   0    9.80    7.90
  -6  -5   0    9.90    3.10
  -6  -5   0   16.10    7.10
   6  -5   0    0.90    5.00
   6  -5   0    8.60    8.10
   6  -5   0   12.90    8.80
   6  -5   0    4.10    6.80
   6  -5   0   11.30    9.90
  -6   5   1   53.19   16.60
  -6  -5  -1   56.19   10.30
  -6  -5  -1   58.49   12.30
  -6   5   1   57.69   11.20
  -6  -5  -1   47.30    9.70
  -6  -5  -1   57.99   11.70
  -6  -5  -1   54.69   14.50
  -6   5   1   54.49   13.70
  -6  -5  -1   47.30   10.00
  -6   5   1   50.59   15.50
  -6   5   1   59.69   14.30
  -6  -5  -1   55.29    9.60
   6  -5  -1   48.60   10.00
   6  -5  -1   51.09   15.20
   6  -5  -1   29.40   11.50
   6  -5  -1   31.20   11.60
   6   5   1   50.19   13.80
  -6  -5  -2 1171.88   70.59
  -6   5   2 1128.59   71.89
  -6   5   2 1227.58   68.99
  -6  -5  -2 1131.09   65.39
  -6  -5  -2 1128.79   64.89
  -6  -5  -2 1158.28   63.39
  -6  -5  -2 1179.38   67.89
  -6  -5  -2 1211.98   65.99
  -6   5   2 1204.98   74.09
  -6  -5  -2 1233.38   63.59
   6  -5  -2 1329.87   58.89
   6  -5  -2 1383.76   65.99
   6   5   2 1346.47   71.69
   6  -5  -2 1367.66   70.09
   6   5   2 1354.46   59.89
   6   5   2 1448.76   60.59
   6  -5  -2 1336.87   69.99
   6  -5  -2 1476.35   77.79
  -6   5   3   58.89   21.80
  -6  -5  -3   68.59   20.10
  -6   5   3   38.20   17.20
  -6  -5  -3   36.60   16.00
  -6  -5  -3   69.49   22.20
  -6   5   3   62.19   18.60
  -6  -5  -3   46.60   15.80
  -6  -5  -3   40.80   15.20
  -6  -5  -3   71.59   19.40
  -6  -5  -3   30.10   16.50
   6  -5  -3   25.80   17.80
   6   5   3   69.19   16.40
   6  -5  -3   60.29   17.60
   6  -5  -3   21.40   15.30
   6  -5  -3   35.10   16.10
   6   5   3   52.29   17.60
   6  -5  -3   65.39   13.30
  -6  -5  -4   26.00   17.60
  -6  -5  -4   57.69   23.10
  -6   5   4   73.79   28.20
  -6   5   4   12.00   16.90
  -6   5   4   30.30   16.80
  -6  -5  -4   67.69   22.10
   6   5   4   54.59   19.70
   6  -5  -4   43.10   24.80
   6  -5  -4   20.90   26.90
   6   5   4   55.69   22.80
   6  -5  -4   49.90   14.80
   6  -5  -4   60.29   16.30
   6  -5  -4   49.10   20.10
  -6   5   5   67.89   25.80
  -6  -5  -5   93.29   27.50
  -6  -5  -5   40.80   27.50
  -6  -5  -5    0.80   21.00
  -6   5   5    4.20   18.00
  -6  -5  -5   20.60   19.40
   6   5   5   52.99   25.40
   6  -5  -5   83.19   32.40
   6  -5  -5  -19.00   31.40
   6   5   5   54.99   25.20
   6  -5  -5   40.10   22.50
   6  -5  -5   26.20   15.70
   6  -5  -5   12.60   27.90
  -7   5  -5  194.18   39.10
  -7   5  -5  115.19   34.50
  -7  -5   5   79.29   28.80
  -7   5  -5   82.19   32.70
  -7  -5   5  130.19   33.40
   7  -5   5  102.99   33.90
   7  -5   5  122.49   35.40
   7   5  -5  147.79   31.00
   7   5  -5  201.28   44.00
  -7   5  -4   74.99   24.90
  -7   5  -4  120.49   32.10
  -7  -5   4   81.99   24.70
  -7   5  -4  114.29   28.10
  -7  -5   4  154.18   30.80
   7   5  -4   90.09   22.30
   7   5  -4   85.29   27.10
   7  -5   4  126.19   32.10
   7  -5   4   92.99   26.90
   7   5  -4   94.49   11.20
  -7   5  -3 1346.57   81.69
  -7  -5   3 1271.47   74.59
  -7   5  -3 1320.87   76.39
  -7   5  -3 1250.97   75.39
  -7  -5   3 1241.38   71.89
  -7   5  -3 1356.76   81.59
  -7   5  -3 1266.87   72.69
  -7  -5   3 1322.77   81.49
   7   5  -3 1257.87   67.79
   7  -5   3 1178.38   75.69
   7  -5   3 1185.08   79.69
   7   5  -3 1311.07   75.09
   7  -5   3 1320.97   75.49
   7   5  -3 1221.38   70.79
   7  -5   3 1251.57   81.69
  -7   5  -2   99.89   22.60
  -7  -5   2  109.39   16.60
  -7   5  -2  110.19   18.10
  -7   5  -2  106.19   22.50
  -7  -5   2  109.69   17.60
  -7  -5   2  111.59   19.30
  -7  -5   2  123.29   19.40
  -7  -5   2  147.69   24.80
  -7   5  -2  100.79   20.70
  -7   5  -2  147.89   23.60
   7  -5   2  112.59   21.90
   7  -5   2  119.59   20.30
   7   5  -2   99.09   17.00
   7   5  -2  113.19   13.50
   7   5  -2  106.99   15.20
   7  -5   2  134.09   23.70
  -7  -5   1  545.35   29.20
  -7  -5   1  529.05   27.20
  -7  -5   1  541.95   27.90
  -7   5  -1  504.35   38.50
  -7   5  -1  417.66   35.30
  -7  -5   1  538.35   31.60
  -7   5  -1  567.64   41.10
  -7   5  -1  487.45   36.00
  -7   5  -1  550.84   39.10
  -7  -5   1  500.15   26.40
  -7   5  -1  525.85   30.80
   7   5  -1  519.45   25.70
   7  -5   1  535.25   39.10
   7  -5   1  487.75   34.90
   7  -5   1  520.05   31.20
   7  -5   1  576.74   41.90
   7   5  -1  554.04   27.80
   7  -5   1  507.05   36.90
  -7  -5   0  455.05   21.40
  -7   5   0  466.65   33.20
  -7  -5   0  432.76   21.60
  -7  -5   0  441.06   26.20
  -7   5   0  448.56   35.90
  -7   5   0  438.36   33.20
  -7   5   0  414.96   29.90
  -7  -5   0  424.76   32.30
   7  -5   0  489.35   37.30
   7  -5   0  438.96   30.70
   7   5   0  458.15   21.00
   7  -5   0  441.56   24.40
   7  -5   0  460.05   32.70
   7  -5   0  388.16   30.00
  -7  -5  -1  450.75   28.70
  -7   5   1  498.75   39.70
  -7   5   1  488.05   40.70
  -7  -5  -1  529.95   32.50
  -7  -5  -1  512.45   32.00
  -7  -5  -1  511.45   29.00
  -7  -5  -1  536.25   31.10
  -7   5   1  525.55   36.60
   7  -5  -1  467.15   38.80
   7  -5  -1  528.55   29.70
   7  -5  -1  533.35   36.00
   7  -5  -1  494.95   35.80
   7  -5  -1  534.95   31.50
  -7  -5  -2  109.09   19.30
  -7  -5  -2  120.49   21.20
  -7  -5  -2  117.19   21.40
  -7  -5  -2  102.59   19.30
  -7   5   2  129.19   23.40
  -7   5   2  113.19   24.50
  -7  -5  -2  112.99   17.60
  -7  -5  -2  130.49   21.10
  -7   5   2  105.79   21.20
  -7   5   2  113.09   24.00
   7  -5  -2  119.39   25.70
   7  -5  -2  125.89   19.70
   7   5   2  113.19   12.80
   7  -5  -2  110.99   14.60
   7  -5  -2  103.49   20.40
   7  -5  -2  115.49   22.00
   7   5   2  138.79   24.60
   7   5   2  125.29   13.80
  -7  -5  -3 1232.78   74.09
  -7  -5  -3 1209.88   73.19
  -7  -5  -3 1223.18   79.39
  -7  -5  -3 1280.47   78.89
  -7  -5  -3 1233.28   72.29
  -7   5   3 1148.79   73.69
  -7  -5  -3 1312.37   71.79
  -7  -5  -3 1253.57   74.29
  -7   5   3 1263.27   76.09
  -7   5   3 1068.29   88.29
   7  -5  -3 1449.06   85.79
   7  -5  -3 1185.38   77.39
   7  -5  -3 1241.08   75.09
   7  -5  -3 1312.17   59.59
   7  -5  -3 1332.97   76.09
  -7   5   4  105.89   25.70
  -7  -5  -4   79.19   27.30
  -7  -5  -4   98.09   23.80
  -7   5   4   64.69   25.00
  -7  -5  -4  133.49   33.00
  -7  -5  -4   71.69   24.10
  -7  -5  -4  102.99   29.30
   7   5   4   85.69   23.10
   7  -5  -4  109.49   28.60
   7  -5  -4   97.49   16.80
   7  -5  -4   89.29   16.70
   7  -5  -4  106.79   32.80
   7  -5  -4   87.79   30.40
  -7  -5  -5  129.49   32.10
  -7  -5  -5   84.49   27.20
  -7   5   5  117.89   33.40
  -7   5   5   86.39   33.60
  -7  -5  -5  132.49   37.60
  -7  -5  -5  157.58   38.60
   7   5   5  130.19   29.60
   7  -5  -5  135.99   23.30
   7  -5  -5  209.98   44.70
   7  -5  -5   98.09   32.60
   7  -5  -5  173.48   43.00
  -8  -5   5   14.20   20.10
  -8  -5   5    9.00   19.70
  -8   5  -5  -13.90   23.60
  -8   5  -5    0.00   22.70
  -8   5  -5   38.00   23.70
  -8   5  -5   19.00   22.40
   8  -5   5    5.50   20.20
   8   5  -5   56.29   24.10
   8  -5   5    3.10   21.40
   8   5  -5   28.20   30.00
  -8   5  -4   18.10   20.00
  -8  -5   4   37.20   20.80
  -8   5  -4   11.50   17.70
  -8   5  -4   -7.10   14.40
  -8  -5   4   10.30   18.40
   8  -5   4   40.10   21.70
   8  -5   4   31.80   21.80
   8   5  -4   11.80   18.40
   8  -5   4   12.30   15.90
  -8   5  -3  379.76   42.90
  -8   5  -3  465.55   40.20
  -8  -5   3  471.05   43.30
  -8   5  -3  452.55   41.60
  -8   5  -3  487.95   43.90
  -8   5  -3  485.05   46.90
  -8  -5   3  477.35   46.00
  -8  -5   3  531.75   41.90
   8  -5   3  489.85   42.00
   8   5  -3  431.16   34.90
   8   5  -3  419.96   36.90
   8   5  -3  426.96   39.10
   8  -5   3  446.96   42.90
   8  -5   3  448.56   47.00
   8  -5   3  400.26   44.10
  -8   5  -2   33.90   12.70
  -8  -5   2   48.20   12.80
  -8  -5   2   35.90   10.60
  -8  -5   2   33.00   13.30
  -8  -5   2   10.70   12.70
  -8   5  -2   38.30   17.20
  -8   5  -2   43.80   16.70
  -8   5  -2   42.40   12.90
  -8   5  -2   30.40   16.90
  -8   5  -2   27.70   14.50
  -8  -5   2   36.10   11.90
   8  -5   2   33.10   16.90
   8  -5   2   39.60   14.00
   8   5  -2   51.69   12.90
   8   5  -2   35.80   11.90
   8  -5   2   36.60   15.40
   8   5  -2   46.20   10.20
   8  -5   2   16.70   13.40
   8  -5   2   72.69   19.60
   8   5  -2   42.40    9.80
  -8   5  -1  288.57   29.20
  -8   5  -1  298.37   21.10
  -8  -5   1  311.07   22.40
  -8  -5   1  287.37   19.50
  -8  -5   1  314.67   19.60
  -8  -5   1  307.47   27.70
  -8   5  -1  297.27   28.30
  -8   5  -1  297.67   27.40
  -8   5  -1  258.57   28.30
  -8  -5   1  283.07   18.40
  -8   5  -1  300.77   29.90
   8  -5   1  307.87   26.40
   8  -5   1  242.08   29.00
   8  -5   1  286.67   27.70
   8   5  -1  256.67   16.30
   8  -5   1  291.67   21.80
   8  -5   1  327.27   30.80
   8   5  -1  257.17   18.90
  -8  -5   0    8.20   11.70
  -8  -5   0    5.00    6.30
  -8   5   0   12.60    9.20
  -8   5   0    0.80    9.60
  -8   5   0    2.20   10.30
  -8  -5   0    7.20    4.10
  -8  -5   0    8.10    4.60
  -8   5   0    9.10    9.30
  -8  -5   0    7.70    4.90
   8  -5   0   17.80   11.10
   8   5   0    3.60    3.10
   8  -5   0   11.20    8.20
   8  -5   0    9.80    5.30
   8   5   0   -0.20    3.70
   8  -5   0    1.20    9.90
   8  -5   0   -6.90    7.60
  -8  -5  -1  306.07   22.10
  -8   5   1  295.77   21.90
  -8   5   1  275.27   27.50
  -8  -5  -1  241.48   21.00
  -8  -5  -1  296.17   28.40
  -8  -5  -1  270.27   22.10
  -8   5   1  275.27   41.40
  -8  -5  -1  298.57   21.00
  -8   5   1  256.87   26.40
  -8   5   1  276.47   30.10
   8  -5  -1  281.57   25.90
   8  -5  -1  273.37   30.00
   8  -5  -1  283.67   23.10
   8  -5  -1  289.77   28.20
   8  -5  -1  305.67   20.60
  -8  -5  -2   51.39   19.20
  -8  -5  -2   46.10   15.30
  -8   5   2   40.50   17.80
  -8  -5  -2   23.60   12.10
  -8   5   2   40.20   15.10
  -8  -5  -2   36.90   12.00
  -8  -5  -2   82.49   17.40
  -8   5   2   33.50   17.60
  -8   5   2   50.19   17.60
  -8  -5  -2   44.70   12.70
  -8  -5  -2   42.40   18.40
   8  -5  -2   38.50   12.50
   8  -5  -2   19.40    8.60
   8  -5  -2   22.50   13.70
   8  -5  -2   17.60   14.50
   8   5   2   38.20    7.90
   8   5   2   58.39   17.60
   8   5   2   35.70    8.40
   8  -5  -2   33.10   14.70
  -8  -5  -3  386.76   36.20
  -8  -5  -3  420.86   43.50
  -8  -5  -3  380.36   37.00
  -8   5   3  461.45   42.90
  -8   5   3  453.65   41.50
  -8  -5  -3  412.66   43.30
  -8  -5  -3  378.66   36.60
  -8  -5  -3  323.07   37.60
  -8  -5  -3  433.56   41.00
   8  -5  -3  424.16   36.70
   8  -5  -3  476.75   26.90
   8   5   3  473.65   34.70
   8  -5  -3  500.65   48.40
   8  -5  -3  442.26   40.80
   8  -5  -3  479.05   41.50
  -8  -5  -4   17.20   16.50
  -8   5   4   24.80   18.30
  -8  -5  -4   22.50   21.00
  -8   5   4   40.00   19.90
  -8  -5  -4   22.20   19.00
  -8  -5  -4   -2.10   11.90
   8  -5  -4   43.10   25.60
   8  -5  -4   10.90    9.60
   8  -5  -4   15.50   16.80
   8   5   4   15.10   15.70
   8   5   4   28.00   15.30
  -8  -5  -5   16.60   21.40
  -8  -5  -5   10.60   24.50
  -8   5   5   19.70   20.20
  -8  -5  -5   38.10   22.10
   8  -5  -5   25.10   14.30
   8   5   5    3.90   20.00
   8  -5  -5   62.09   28.90
   8  -5  -5   29.10   28.00
  -9   5  -5   41.50   28.50
  -9   5  -5   96.89   34.80
  -9   5  -5   39.80   28.20
  -9  -5   5   59.39   27.40
  -9   5  -5   39.60   28.00
  -9  -5   5   80.69   28.90
   9  -5   5   58.39   29.40
   9  -5   5  101.39   34.50
  -9   5  -4  307.87   47.40
  -9  -5   4  193.78   34.80
  -9  -5   4  268.77   41.80
  -9   5  -4  254.17   47.10
  -9   5  -4  214.68   39.10
   9  -5   4  314.27   45.90
   9   5  -4  223.98   40.00
   9   5  -4  190.18   29.80
   9  -5   4  224.18   39.90
   9  -5   4  242.48   41.90
  -9   5  -3  117.19   30.80
  -9   5  -3  182.98   31.40
  -9  -5   3  156.78   31.60
  -9   5  -3  155.28   25.80
  -9   5  -3  146.19   31.50
  -9  -5   3  132.79   28.40
  -9   5  -3  139.99   30.10
   9  -5   3  160.68   35.20
   9  -5   3  173.08   33.70
   9  -5   3  177.98   29.40
   9   5  -3  155.58   25.90
   9   5  -3  134.49   25.90
   9   5  -3   99.09   18.60
   9  -5   3  246.48   36.50
  -9   5  -2   15.20   12.60
  -9   5  -2    4.70    7.80
  -9  -5   2    0.30    8.70
  -9  -5   2   -1.80   12.80
  -9  -5   2   10.20    8.40
  -9   5  -2    9.80   12.90
  -9   5  -2   -4.10   10.00
  -9  -5   2  -12.30    6.90
  -9   5  -2   -6.20   11.10
  -9  -5   2    3.00   10.40
   9   5  -2   17.90    7.10
   9  -5   2   15.30   12.50
   9  -5   2   -1.60    9.30
   9  -5   2    9.00   10.90
   9  -5   2   13.50   11.70
   9   5  -2    6.70    8.10
   9   5  -2   -2.60    8.60
   9  -5   2   17.40   14.30
  -9   5  -1  220.98   33.00
  -9   5  -1  228.58   24.80
  -9  -5   1  223.18   16.80
  -9  -5   1  214.68   17.50
  -9  -5   1  209.68   17.50
  -9  -5   1  188.78   16.60
  -9   5  -1  173.58   27.10
  -9  -5   1  203.68   18.20
   9  -5   1  276.47   29.50
   9   5  -1  248.48   15.20
   9  -5   1  284.87   26.50
   9  -5   1  249.88   19.50
   9  -5   1  268.97   27.50
   9  -5   1  309.07   32.00
  -9   5   0  516.25   37.70
  -9   5   0  472.95   35.10
  -9  -5   0  468.45   27.80
  -9  -5   0  498.65   29.80
  -9  -5   0  516.85   39.80
  -9   5   0  494.15   41.60
  -9  -5   0  487.15   27.40
  -9   5   0  500.05   38.70
  -9  -5   0  509.65   26.50
   9  -5   0  551.84   43.30
   9   5   0  511.25   26.80
   9  -5   0  534.35   25.10
   9  -5   0  541.55   38.60
   9  -5   0  501.95   36.80
   9  -5   0  509.95   36.20
   9   5   0  503.65   24.10
  -9   5   1  289.37   38.80
  -9   5   1  280.47   33.10
  -9   5   1  248.98   26.10
  -9  -5  -1  265.07   38.80
  -9  -5  -1  227.68   19.30
  -9   5   1  257.67   20.80
  -9  -5  -1  287.27   21.80
  -9   5   1  245.28   27.20
  -9  -5  -1  206.98   20.10
  -9  -5  -1  217.28   26.20
  -9  -5  -1  240.88   21.00
   9  -5  -1  210.88   16.50
   9  -5  -1  182.68   25.40
   9  -5  -1  181.68   26.90
   9  -5  -1  212.18   21.00
   9  -5  -1  231.88   33.20
  -9  -5  -2  -17.10    8.90
  -9  -5  -2   22.60   10.60
  -9   5   2   -1.50    9.70
  -9  -5  -2    2.80    9.40
  -9  -5  -2   22.70   12.30
  -9   5   2   -5.80   12.90
  -9  -5  -2    7.30   12.30
  -9  -5  -2   14.60   14.30
  -9   5   2   -4.50   10.20
  -9  -5  -2   -1.40    9.10
   9  -5  -2   -0.20    8.80
   9  -5  -2    7.00    6.80
   9  -5  -2   20.80   13.60
   9  -5  -2   10.80   11.80
   9  -5  -2    0.40   12.80
  -9  -5  -3  156.58   28.90
  -9  -5  -3  190.08   30.90
  -9   5   3  185.08   35.10
  -9   5   3  156.88   29.80
  -9   5   3  152.18   29.90
  -9  -5  -3  201.98   34.90
  -9  -5  -3  165.38   27.60
  -9  -5  -3  183.28   27.90
  -9  -5  -3  145.69   29.60
  -9  -5  -3  162.68   34.20
   9   5   3  111.59   19.30
   9  -5  -3  222.68   30.10
   9  -5  -3  153.08   33.80
   9  -5  -3  155.18   13.80
   9  -5  -3  171.78   29.70
   9   5   3  177.68   22.80
  -9  -5  -4  308.17   50.09
  -9  -5  -4  222.78   42.90
  -9  -5  -4  256.27   38.90
  -9  -5  -4  210.78   38.20
  -9   5   4  208.98   38.30
  -9  -5  -4  244.88   36.30
  -9   5   4  201.68   37.20
   9  -5  -4  246.38   16.80
   9  -5  -4  176.98   41.60
   9   5   4  273.67   35.10
   9   5   4  211.68   31.90
   9  -5  -4  223.08   16.00
   9  -5  -4  275.97   40.90
  -9  -5  -5   62.29   34.60
  -9  -5  -5   54.49   26.60
  -9  -5  -5   77.29   24.60
  -9   5   5   98.29   34.80
   9   5   5   32.50   25.00
   9  -5  -5   17.70   25.50
   9  -5  -5   26.20   28.50
 -10  -5   5   85.19   30.80
 -10   5  -5   56.79   32.20
 -10  -5   5   99.19   34.60
 -10   5  -5   82.69   30.40
 -10   5  -5   79.59   32.40
  10  -5   5   83.69   32.40
  10  -5   5  102.09   35.70
  10   5  -5   62.89   34.20
 -10  -5   4   14.00   20.10
 -10   5  -4  -30.90   16.70
 -10   5  -4  -28.40   17.60
 -10  -5   4   14.10   25.50
 -10   5  -4  -19.50   15.00
  10   5  -4  -26.10   12.20
  10  -5   4   13.60   20.10
  10   5  -4   10.00   18.40
  10  -5   4   -9.90   17.70
  10  -5   4  -13.40   15.70
  10  -5   4  -25.70   14.50
 -10   5  -3  212.38   33.90
 -10  -5   3  241.98   29.20
 -10  -5   3  175.48   29.30
 -10   5  -3  278.87   42.40
 -10  -5   3  231.78   25.50
 -10   5  -3  255.97   29.10
  10  -5   3  247.58   37.80
  10   5  -3  240.78   25.00
  10   5  -3  249.18   29.90
  10  -5   3  210.38   39.20
  10   5  -3  259.57   28.10
  10  -5   3  251.57   29.70
 -10  -5   2  172.08   30.10
 -10   5  -2  241.68   36.30
 -10  -5   2  163.98   19.00
 -10  -5   2  163.18   22.70
 -10   5  -2  171.08   19.50
 -10  -5   2  170.68   23.80
 -10   5  -2  210.58   34.80
 -10   5  -2  231.68   35.70
 -10  -5   2  159.28   23.40
 -10   5  -2  177.28   27.80
  10  -5   2  131.59   25.00
  10   5  -2  135.99   19.10
  10  -5   2  157.08   32.10
  10  -5   2  167.58   23.70
  10   5  -2  157.58   19.30
  10  -5   2  153.68   25.90
  10  -5   2  197.18   34.40
 -10  -5   1  260.57   19.60
 -10   5  -1  196.18   32.30
 -10   5  -1  278.07   29.70
 -10  -5   1  277.37   21.20
 -10  -5   1  251.07   19.20
 -10   5  -1  257.17   28.40
 -10   5  -1  262.37   37.60
 -10  -5   1  271.47   19.50
 -10   5  -1  259.17   37.10
 -10  -5   1  250.27   20.20
  10   5  -1  282.27   20.50
  10  -5   1  304.97   33.40
  10  -5   1  257.77   26.90
  10  -5   1  268.47   32.00
  10  -5   1  302.87   20.80
  10  -5   1  256.97   28.60
  10   5  -1  274.67   17.10
 -10   5   0   65.39   20.50
 -10  -5   0   87.69   11.50
 -10  -5   0   72.69   10.80
 -10   5   0   74.19   17.40
 -10   5   0   83.39   23.30
 -10  -5   0   85.19   11.40
 -10  -5   0   61.59   11.60
 -10  -5   0   79.29   19.50
 -10  -5   0   49.40   15.70
 -10   5   0   83.89   18.10
  10  -5   0  105.29   20.50
  10  -5   0   76.29   21.30
  10   5   0   68.79    9.00
  10   5   0  113.29   11.60
  10  -5   0   76.99    5.80
  10  -5   0   82.79   17.00
  10  -5   0   89.89   20.20
 -10   5   1  251.97   27.60
 -10  -5  -1  303.67   31.70
 -10   5   1  286.47   32.80
 -10  -5  -1  258.17   23.30
 -10   5   1  262.77   35.00
 -10  -5  -1  258.77   21.30
 -10  -5  -1  308.37   34.00
 -10  -5  -1  291.17   24.40
 -10   5   1  227.78   21.80
 -10  -5  -1  293.37   22.10
  10  -5  -1  240.48   16.10
  10  -5  -1  231.88   35.20
  10  -5  -1  248.88   28.10
  10  -5  -1  241.58   16.00
  10  -5  -1  210.88   29.40
  10  -5  -1  234.28   22.80
 -10   5   2  110.79   23.30
 -10  -5  -2  158.38   24.20
 -10   5   2  158.28   28.00
 -10  -5  -2  140.99   25.30
 -10   5   2  186.08   33.70
 -10  -5  -2  178.88   20.90
 -10  -5  -2  142.19   24.80
 -10  -5  -2  159.28   25.40
 -10  -5  -2  157.28   30.30
  10  -5  -2  186.28   19.40
  10  -5  -2  199.58   30.10
  10  -5  -2  153.08   15.10
 -10   5   3  282.47   45.90
 -10  -5  -3  278.57   32.10
 -10  -5  -3  233.88   32.90
 -10  -5  -3  254.07   37.20
 -10  -5  -3  257.17   37.10
 -10   5   3  215.98   34.50
 -10  -5  -3  233.68   34.40
 -10  -5  -3  255.87   38.80
 -10  -5  -3  272.27   49.80
 -10   5   3  276.27   41.10
  10  -5  -3  225.88   30.60
  10   5   3  224.98   21.70
  10   5   3  302.57   24.50
  10  -5  -3  228.38   34.70
 -10  -5  -4  -22.30   15.90
 -10   5   4    3.90   19.40
 -10  -5  -4   25.10   17.30
 -10  -5  -4  -29.00   11.50
 -10  -5  -4    3.30   12.40
 -10  -5  -4  -18.00   15.60
 -10  -5  -4   33.80   22.40
 -10   5   4   17.10   18.60
  10   5   4   41.60   19.10
  10  -5  -4   -4.70   20.00
  10  -5  -4   17.10   18.80
  10   5   4   -5.20   14.30
 -10  -5  -5   48.20   27.80
 -10   5   5   46.20   30.10
 -10  -5  -5   67.99   33.00
  10  -5  -5   64.69   32.10
  10  -5  -5   33.10   36.50
 -11  -5   4  141.29   30.60
 -11   5  -4  151.28   38.20
 -11  -5   4  180.88   32.90
 -11   5  -4  196.58   41.10
 -11   5  -4  192.58   37.50
  11  -5   4  218.68   42.70
  11  -5   4  129.49   31.80
  11   5  -4  124.99   29.50
  11  -5   4  161.68   35.60
  11   5  -4   86.49   23.20
 -11  -5   3   81.29   21.40
 -11  -5   3   57.39   16.30
 -11   5  -3   85.69   23.40
 -11   5  -3   74.89   20.10
 -11   5  -3   72.69   27.20
 -11  -5   3   60.99   18.60
  11  -5   3   92.29   28.70
  11  -5   3   85.89   21.40
  11  -5   3   60.09   23.70
  11   5  -3   68.29   21.30
 -11   5  -2   15.10   13.30
 -11  -5   2    6.90    8.90
 -11   5  -2    7.20   14.40
 -11   5  -2   23.00   15.20
 -11   5  -2  -11.70    9.30
 -11  -5   2   18.40   10.70
 -11  -5   2   10.80   10.60
  11  -5   2    2.10   13.80
  11  -5   2   26.50   11.50
  11  -5   2   18.60   16.90
  11  -5   2    1.90   11.80
  11   5  -2   19.00    8.50
  11  -5   2   49.10   21.60
 -11  -5   1   68.29   11.30
 -11   5  -1   57.99   21.00
 -11  -5   1   87.59   13.30
 -11   5  -1   90.59   21.80
 -11  -5   1   89.99   15.20
 -11   5  -1   68.99   19.80
 -11   5  -1   58.99   21.60
 -11  -5   1   70.59   12.10
 -11   5  -1   40.10   19.30
  11   5  -1   96.29   13.50
  11  -5   1  110.69   21.90
  11  -5   1  118.79   26.50
  11   5  -1   97.89   10.20
  11  -5   1  100.99   11.70
  11  -5   1   77.29   21.60
 -11   5   0  291.17   29.90
 -11  -5   0  285.07   22.60
 -11   5   0  288.67   28.70
 -11   5   0  290.77   32.20
 -11   5   0  282.97   39.20
 -11  -5   0  283.67   27.90
 -11  -5   0  255.57   17.50
 -11  -5   0  282.97   17.60
 -11  -5   0  278.57   33.30
 -11  -5   0  297.97   20.90
  11  -5   0  271.37   29.10
  11   5   0  249.28   17.10
[truncated: 702,858 more chars]
