# Supplementary material for: Metal Complexes Containing Homoleptic Diorganoselenium(II) Ligands: Synthesis, Characterization and Investigation of Optical Properties
Source: Molecules. 2024 Feb 8;29(4):792. doi: 10.3390/molecules29040792 (PMC10892405; doi:10.3390/molecules29040792)
Supplement: Supplementary file 1 [file molecules-29-00792-s001.zip › Cpd_9_CCDC_ 2308733.cif]

data_global

_publ_requested_journal          Molecules

_publ_contact_author_name        'Alexandra Pop'
_publ_contact_author_address     
;Supramolecular Organic and Organometallic Chemistry Centre, Department of Chemistry, Faculty of Chemistry and Chemical Engineering, Babes-Bolyai University, Str. Arany Janos 11, RO-400028 Cluj-Napoca, Romania
;
_publ_contact_author_email       alexandra.m.pop@Ubbcluj.ro
_publ_contact_author_phone       ?
_publ_contact_author_fax         ?
loop_
_publ_author_name
_publ_author_address
'Darius, Dumitras'
;Supramolecular Organic and Organometallic Chemistry Centre, Department of Chemistry, Faculty of Chemistry and Chemical Engineering, Babes-Bolyai University, Str. Arany Janos 11, RO-400028 Cluj-Napoca, Romania
;
'Gal, Emese'
;Research Center on Fundamental and Applied Heterochemistry, Faculty of Chemistry and Chemical Engineering, Babes-Bolyai University, 11 Arany Janos street, RO-400028, Cluj-Napoca, Romania
;
'Silvestru, Cristian'
;Supramolecular Organic and Organometallic Chemistry Centre, Department of Chemistry, Faculty of Chemistry and Chemical Engineering, Babes-Bolyai University, Str. Arany Janos 11, RO-400028 Cluj-Napoca, Romania.
;
'Pop, Alexandra'
;Supramolecular Organic and Organometallic Chemistry Centre, Department of Chemistry, Faculty of Chemistry and Chemical Engineering, Babes-Bolyai University, Str. Arany Janos 11, RO-400028 Cluj-Napoca, Romania.
;
_audit_creation_method           'APEX4 v2021.10-0'

_publ_section_title              
;
;
_publ_section_abstract           
;
;
_publ_section_references         
;
;
_publ_section_comment            
;
;
data_ale288
_chemical_name_systematic               ?
_chemical_name_common                   DMI75
_chemical_formula_moiety                ?
_chemical_formula_sum                   'C76 H48 Ag4 Cl24 F12 N4 O20 S4 Se2'
_chemical_formula_iupac                 ?
_chemical_formula_weight                3133.62

_chemical_melting_point                 ?

_space_group_crystal_system             triclinic
_space_group_IT_number                  2
_space_group_name_H-M_alt               'P -1'
_space_group_name_Hall                  '-P 1'
loop_
    _space_group_symop_operation_xyz
    'x, y, z'
    '-x, -y, -z'

_cell_length_a                          11.2955(13)
_cell_length_b                          13.2811(15)
_cell_length_c                          17.903(2)
_cell_angle_alpha                       84.806(3)
_cell_angle_beta                        81.693(3)
_cell_angle_gamma                       88.358(4)
_cell_volume                            2646.3(5)
_cell_formula_units_Z                   1
_cell_measurement_reflns_used           9321
_cell_measurement_theta_min             2.2918
_cell_measurement_theta_max             27.1851
_cell_measurement_temperature           100.(2)

_exptl_crystal_description              block
_exptl_crystal_colour                   'clear intense yellow'
_exptl_crystal_size_max                 0.081
_exptl_crystal_size_mid                 0.064
_exptl_crystal_size_min                 0.023
_exptl_crystal_density_diffrn           1.966
_exptl_crystal_density_meas             ?
_exptl_crystal_density_method           'not measured'
_exptl_crystal_F_000                    1528

_exptl_absorpt_coefficient_mu           2.188
_exptl_absorpt_correction_type          Multi-Scan
_exptl_absorpt_process_details          
;
Krause, L., Herbst-Irmer, R., Sheldrick G.M. & Stalke D.,
J. Appl. Cryst. 48 (2015) 3-10
;
_exptl_absorpt_correction_T_min         0.78
_exptl_absorpt_correction_T_max         0.95

_exptl_special_details                  
;
; 

_diffrn_ambient_temperature             100.(2)

_diffrn_source                          
    'Incoatec Mo--I\mS 3.0 microfocus source'
_diffrn_source_type                     ?
_diffrn_source_power                    0.07
_diffrn_source_current                  1.4
_diffrn_source_voltage                  50

_diffrn_radiation_probe                 ?
_diffrn_radiation_type                  'Mo K\a'
_diffrn_radiation_wavelength            0.71073
_diffrn_radiation_monochromator         'multilayer optics'

_diffrn_measurement_device              ?
_diffrn_measurement_device_type         'Bruker D8 Venture'
_diffrn_measurement_method              '\f and \w scans'

_diffrn_detector_area_resol_mean        7.3910

_diffrn_reflns_number                   106466
_diffrn_reflns_av_R_equivalents         0.1210
_diffrn_reflns_av_unetI/netI            0.0567
_diffrn_reflns_theta_min                2.00
_diffrn_reflns_theta_max                25.00
_diffrn_reflns_theta_full               25.00
_diffrn_measured_fraction_theta_max     1.000
_diffrn_measured_fraction_theta_full    1.000
_diffrn_reflns_limit_h_min              -13
_diffrn_reflns_limit_h_max              13
_diffrn_reflns_limit_k_min              -15
_diffrn_reflns_limit_k_max              15
_diffrn_reflns_limit_l_min              -21
_diffrn_reflns_limit_l_max              21

_refine_special_details                 
;
;

_reflns_number_total                    9332
_reflns_number_gt                       6615
_reflns_threshold_expression            'I > 2\s(I)'
_reflns_Friedel_coverage                0.000
_reflns_Friedel_fraction_max            .
_reflns_Friedel_fraction_full           .

_refine_ls_structure_factor_coef        Fsqd
_refine_ls_matrix_type                  full
_refine_ls_R_factor_all                 0.1046
_refine_ls_R_factor_gt                  0.0669
_refine_ls_wR_factor_gt                 0.1609
_refine_ls_wR_factor_ref                0.1764
_refine_ls_goodness_of_fit_ref          1.036
_refine_ls_restrained_S_all             1.036
_refine_ls_number_reflns                9332
_refine_ls_number_parameters            658
_refine_ls_number_restraints            0
_refine_ls_number_constraints           ?
_refine_ls_hydrogen_treatment           constr
_refine_ls_weighting_scheme             calc
_refine_ls_weighting_details            
    'w=1/[\s^2^(Fo^2^)+(0.0669P)^2^+33.5358P] where P=(Fo^2^+2Fc^2^)/3'

_atom_sites_solution_hydrogens          geom
_atom_sites_solution_primary            ?
_atom_sites_solution_secondary          ?

_refine_ls_shift/su_max                 0.001
_refine_ls_shift/su_mean                0.000
_refine_diff_density_max                2.605
_refine_diff_density_min                -1.647
_refine_ls_extinction_method            none
_refine_ls_extinction_coef              ?

loop_
    _atom_type_symbol
    _atom_type_description
    _atom_type_scat_dispersion_real
    _atom_type_scat_dispersion_imag
    _atom_type_scat_source
    C C 0.0033 0.0016 'International Tables Vol C Tables 4.2.6.8 and 6.1.1.4'
    H H 0.0000 0.0000 'International Tables Vol C Tables 4.2.6.8 and 6.1.1.4'
    Ag Ag -0.8971 1.1015
     'International Tables Vol C Tables 4.2.6.8 and 6.1.1.4'
    F F 0.0171 0.0103 'International Tables Vol C Tables 4.2.6.8 and 6.1.1.4'
    N N 0.0061 0.0033 'International Tables Vol C Tables 4.2.6.8 and 6.1.1.4'
    O O 0.0106 0.0060 'International Tables Vol C Tables 4.2.6.8 and 6.1.1.4'
    S S 0.1246 0.1234 'International Tables Vol C Tables 4.2.6.8 and 6.1.1.4'
    Se Se -0.0929 2.2259
     'International Tables Vol C Tables 4.2.6.8 and 6.1.1.4'
    Cl Cl 0.1484 0.1585
     'International Tables Vol C Tables 4.2.6.8 and 6.1.1.4'

_computing_data_collection              'Bruker APEX4 2021.10-0'
_computing_cell_refinement              'SAINT V8.40B (Bruker AXS LLC, 2019)'
_computing_data_reduction               'SAINT V8.40B (Bruker AXS LLC, 2019)'
_computing_structure_solution           'XT, VERSION 2018/2'
_computing_structure_refinement         'SHELXL-2019/1 (Sheldrick, 2019)'
_computing_molecular_graphics           'shelXle (C.B. Huebschle, rev 1328)'
_computing_publication_material         'Bruker APEX4 2021.10-0'

loop_
    _atom_site_type_symbol
    _atom_site_label
    _atom_site_fract_x
    _atom_site_fract_y
    _atom_site_fract_z
    _atom_site_U_iso_or_equiv
    _atom_site_adp_type
    _atom_site_calc_flag
    _atom_site_refinement_flags_adp
    _atom_site_refinement_flags_occupancy
    _atom_site_refinement_flags_posn
    _atom_site_occupancy
    _atom_site_disorder_assembly
    _atom_site_disorder_group
    Ag Ag1 0.85550(6) 0.31207(5) 0.49387(4) 0.03168(19) Uani d . . . 1 . .
    Ag Ag2 1.01637(6) 0.51537(5) 0.33986(4) 0.03047(19) Uani d . . . 1 . .
    Se Se1 0.82119(7) 0.40672(7) 0.76269(4) 0.0247(2) Uani d . . . 1 . .
    Cl Cl1 0.6292(4) 0.0856(3) 0.45232(19) 0.0832(12) Uani d . . . 1 . .
    Cl Cl2 0.5803(3) -0.0605(2) 0.3527(2) 0.0656(9) Uani d . . . 1 . .
    Cl Cl3 0.5163(3) 0.1480(3) 0.3224(3) 0.0810(12) Uani d . . . 1 . .
    Cl Cl4 0.9114(3) 0.0918(3) 0.1183(2) 0.0783(11) Uani d . . . 1 . .
    Cl Cl5 0.6615(4) 0.0454(3) 0.1358(3) 0.1021(15) Uani d . . . 1 . .
    Cl Cl6 0.7415(3) 0.2356(2) 0.06358(18) 0.0621(8) Uani d . . . 1 . .
    Cl Cl7 1.1335(4) 0.3043(3) 0.7582(3) 0.0887(13) Uani d . . . 1 . .
    Cl Cl8 1.1424(3) 0.1994(3) 0.9035(2) 0.0780(11) Uani d . . . 1 . .
    Cl Cl9 1.3628(2) 0.2404(2) 0.80190(17) 0.0554(7) Uani d . . . 1 . .
    Cl Cl10 0.6983(3) -0.0658(2) 0.92339(18) 0.0627(8) Uani d . . . 1 . .
    Cl Cl11 0.8599(3) 0.1002(2) 0.88644(16) 0.0566(8) Uani d . . . 1 . .
    Cl Cl12 0.6449(3) 0.1009(2) 0.81767(15) 0.0511(7) Uani d . . . 1 . .
    S S1 0.78780(19) 0.34043(18) 0.31982(12) 0.0303(5) Uani d . . . 1 . .
    S S2 0.85629(19) 0.57975(17) 0.51217(12) 0.0267(5) Uani d . . . 1 . .
    F F1 0.6801(7) 0.5131(6) 0.3009(7) 0.101(3) Uani d . . . 1 . .
    F F2 0.7007(6) 0.4314(8) 0.2063(4) 0.094(3) Uani d . . . 1 . .
    F F3 0.5683(5) 0.3878(5) 0.3002(3) 0.0463(15) Uani d . . . 1 . .
    F F4 0.6686(5) 0.6429(5) 0.5983(3) 0.0432(14) Uani d . . . 1 . .
    F F5 0.7236(5) 0.7427(4) 0.4986(3) 0.0472(15) Uani d . . . 1 . .
    F F6 0.6344(5) 0.6053(5) 0.4901(4) 0.0541(17) Uani d . . . 1 . .
    O O2 1.1040(6) 0.0821(5) 0.6962(4) 0.0360(15) Uani d . . . 1 . .
    O O3 0.3430(5) 0.2878(4) 1.0047(3) 0.0292(14) Uani d . . . 1 . .
    O O4 0.5163(6) 0.2065(5) 0.9647(3) 0.0335(15) Uani d . . . 1 . .
    O O5 0.7427(7) 0.3321(8) 0.3993(4) 0.070(3) Uani d . . . 1 . .
    O O6 0.7875(6) 0.2513(5) 0.2826(5) 0.052(2) Uani d . . . 1 . .
    O O7 0.8973(6) 0.3948(5) 0.3008(4) 0.0401(17) Uani d . . . 1 . .
    O O8 0.8284(6) 0.4758(5) 0.5354(4) 0.0345(15) Uani d . . . 1 . .
    O O9 0.9262(5) 0.6247(5) 0.5615(3) 0.0313(14) Uani d . . . 1 . .
    O O10 0.8982(6) 0.6022(5) 0.4325(3) 0.0334(15) Uani d . . . 1 . .
    N N1 0.9568(6) 0.1808(5) 0.5464(4) 0.0269(16) Uani d . . . 1 . .
    N N2 0.3819(6) 0.4476(6) 0.9517(4) 0.0269(16) Uani d . . . 1 . .
    C C1 0.7235(8) 0.3533(7) 0.6950(5) 0.028(2) Uani d . . . 1 . .
    C C2 0.7661(8) 0.2656(6) 0.6612(5) 0.0261(19) Uani d . . . 1 . .
    O O1 1.1169(6) 0.0845(5) 0.5698(3) 0.0326(15) Uani d . . . 1 . .
    C C11 1.0823(8) 0.1104(7) 0.4394(5) 0.029(2) Uani d . . . 1 . .
    C C12 1.1901(8) 0.0654(7) 0.4150(6) 0.036(2) Uani d . . . 1 . .
    H H12 1.244467 0.048349 0.450125 0.043000 Uiso calc U . R 1 . .
    C C13 1.2213(9) 0.0443(7) 0.3410(5) 0.035(2) Uani d . . . 1 . .
    H H13 1.294401 0.009719 0.325764 0.041000 Uiso calc U . R 1 . .
    C C14 1.1457(9) 0.0738(7) 0.2891(5) 0.036(2) Uani d . . . 1 . .
    H H14 1.168222 0.061929 0.237388 0.044000 Uiso calc U . R 1 . .
    C C15 1.0358(9) 0.1211(7) 0.3120(5) 0.034(2) Uani d . . . 1 . .
    H H15 0.983340 0.141632 0.276269 0.040000 Uiso calc U . R 1 . .
    C C16 1.0047(9) 0.1376(7) 0.3882(6) 0.038(2) Uani d . . . 1 . .
    H H16 0.929378 0.167735 0.404947 0.045000 Uiso calc U . R 1 . .
    C C17 0.7224(7) 0.5227(7) 0.7919(5) 0.0262(19) Uani d . . . 1 . .
    C C18 0.6192(8) 0.5099(7) 0.8462(5) 0.028(2) Uani d . . . 1 . .
    C C19 0.5514(8) 0.5971(7) 0.8629(5) 0.0275(19) Uani d . . . 1 . .
    H H19 0.479917 0.591156 0.898014 0.033000 Uiso calc U . R 1 . .
    C C20 0.5861(8) 0.6917(7) 0.8293(5) 0.031(2) Uani d . . . 1 . .
    H H20 0.539444 0.749810 0.842386 0.037000 Uiso calc U . R 1 . .
    C C21 0.6885(8) 0.7017(7) 0.7769(5) 0.034(2) Uani d . . . 1 . .
    H H21 0.712392 0.766424 0.753457 0.041000 Uiso calc U . R 1 . .
    C C22 0.7563(8) 0.6158(7) 0.7589(5) 0.033(2) Uani d . . . 1 . .
    H H22 0.827060 0.622181 0.723105 0.039000 Uiso calc U . R 1 . .
    C C23 0.5839(7) 0.4114(7) 0.8831(4) 0.0251(19) Uani d . . . 1 . .
    H H23 0.639540 0.357477 0.873314 0.030000 Uiso calc U . R 1 . .
    C C24 0.4821(8) 0.3868(7) 0.9294(5) 0.028(2) Uani d . . . 1 . .
    C C25 0.4588(8) 0.2834(8) 0.9640(5) 0.030(2) Uani d . . . 1 . .
    C C26 0.3062(8) 0.3880(7) 0.9945(5) 0.029(2) Uani d . . . 1 . .
    C C27 0.1924(8) 0.4169(7) 1.0362(5) 0.028(2) Uani d . . . 1 . .
    C C28 0.1189(8) 0.3457(8) 1.0807(5) 0.033(2) Uani d . . . 1 . .
    H H28 0.139720 0.275871 1.081886 0.039000 Uiso calc U . R 1 . .
    C C29 0.0145(8) 0.3782(8) 1.1233(5) 0.032(2) Uani d . . . 1 . .
    H H29 -0.036376 0.330495 1.154124 0.039000 Uiso calc U . R 1 . .
    C C30 -0.0150(8) 0.4793(8) 1.1208(5) 0.034(2) Uani d . . . 1 . .
    H H30 -0.085831 0.501171 1.150751 0.041000 Uiso calc U . R 1 . .
    C C31 0.0565(8) 0.5492(8) 1.0757(5) 0.034(2) Uani d . . . 1 . .
    H H31 0.034087 0.618778 1.074026 0.041000 Uiso calc U . R 1 . .
    C C32 0.1619(8) 0.5187(7) 1.0323(5) 0.029(2) Uani d . . . 1 . .
    H H32 0.211577 0.566748 1.000843 0.035000 Uiso calc U . R 1 . .
    C C33 0.7120(8) 0.6469(7) 0.5253(5) 0.033(2) Uani d . . . 1 . .
    C C34 0.6786(9) 0.4228(8) 0.2811(7) 0.049(3) Uani d . . . 1 . .
    C C35 0.6185(9) 0.0650(8) 0.3595(6) 0.040(2) Uani d . . . 1 . .
    H H35 0.698743 0.077295 0.328695 0.049000 Uiso calc U . R 1 . .
    C C36 0.7644(11) 0.1399(9) 0.1339(7) 0.055(3) Uani d . . . 1 . .
    H H36 0.751640 0.169113 0.184026 0.066000 Uiso calc U . R 1 . .
    C C37 1.2101(10) 0.2113(9) 0.8077(7) 0.052(3) Uani d . . . 1 . .
    H H37 1.203587 0.145551 0.785545 0.063000 Uiso calc U . R 1 . .
    C C38 0.7114(9) 0.0638(8) 0.9001(6) 0.043(3) Uani d . . . 1 . .
    H H38 0.667786 0.099355 0.943085 0.052000 Uiso calc U . R 1 . .
    C C3 0.6988(8) 0.2282(7) 0.6093(5) 0.028(2) Uani d . . . 1 . .
    H H3 0.725372 0.169262 0.585085 0.033000 Uiso calc U . R 1 . .
    C C4 0.5952(8) 0.2768(7) 0.5938(5) 0.033(2) Uani d . . . 1 . .
    H H4 0.549973 0.250797 0.559332 0.040000 Uiso calc U . R 1 . .
    C C5 0.5563(9) 0.3627(8) 0.6277(5) 0.037(2) Uani d . . . 1 . .
    H H5 0.484765 0.396033 0.616252 0.044000 Uiso calc U . R 1 . .
    C C6 0.6211(7) 0.4011(7) 0.6788(5) 0.029(2) Uani d . . . 1 . .
    H H6 0.593888 0.460503 0.702296 0.035000 Uiso calc U . R 1 . .
    C C7 0.8778(8) 0.2140(6) 0.6776(5) 0.0272(19) Uani d . . . 1 . .
    H H7 0.893659 0.208789 0.728454 0.033000 Uiso calc U . R 1 . .
    C C8 0.9583(8) 0.1739(7) 0.6259(5) 0.0270(19) Uani d . . . 1 . .
    C C9 1.0630(8) 0.1123(7) 0.6394(5) 0.033(2) Uani d . . . 1 . .
    C C10 1.0468(8) 0.1293(7) 0.5181(5) 0.029(2) Uani d . . . 1 . .

loop_
    _atom_site_aniso_label
    _atom_site_aniso_U_11
    _atom_site_aniso_U_22
    _atom_site_aniso_U_33
    _atom_site_aniso_U_12
    _atom_site_aniso_U_13
    _atom_site_aniso_U_23
    Ag1 0.0350(4) 0.0342(4) 0.0249(4) 0.0008(3) -0.0002(3) -0.0044(3)
    Ag2 0.0242(4) 0.0425(4) 0.0228(3) -0.0063(3) 0.0055(3) -0.0048(3)
    Se1 0.0208(4) 0.0351(5) 0.0167(4) -0.0038(4) 0.0044(3) -0.0054(3)
    Cl1 0.136(4) 0.072(2) 0.0435(17) 0.023(2) -0.016(2) -0.0148(16)
    Cl2 0.064(2) 0.0505(18) 0.081(2) -0.0123(15) 0.0009(17) -0.0114(16)
    Cl3 0.059(2) 0.064(2) 0.124(3) -0.0137(17) -0.042(2) 0.022(2)
    Cl4 0.082(2) 0.074(2) 0.088(3) 0.0213(19) -0.036(2) -0.026(2)
    Cl5 0.099(3) 0.060(2) 0.134(4) -0.019(2) 0.025(3) 0.000(2)
    Cl6 0.070(2) 0.0559(18) 0.0611(19) 0.0004(15) -0.0169(16) 0.0027(15)
    Cl7 0.088(3) 0.0470(19) 0.147(4) 0.0021(17) -0.076(3) -0.005(2)
    Cl8 0.056(2) 0.091(3) 0.091(3) -0.0090(18) -0.0010(18) -0.045(2)
    Cl9 0.0405(15) 0.072(2) 0.0577(17) 0.0019(14) -0.0137(13) -0.0178(15)
    Cl10 0.080(2) 0.0459(17) 0.0554(18) -0.0059(15) 0.0079(16) 0.0061(14)
    Cl11 0.0430(16) 0.077(2) 0.0482(16) -0.0063(14) 0.0008(13) -0.0040(15)
    Cl12 0.0486(16) 0.0684(19) 0.0331(13) 0.0169(14) 0.0027(12) -0.0064(12)
    S1 0.0226(11) 0.0439(14) 0.0242(11) -0.0034(10) 0.0002(9) -0.0066(10)
    S2 0.0217(11) 0.0344(12) 0.0228(11) -0.0006(9) 0.0019(9) -0.0043(9)
    F1 0.049(5) 0.047(5) 0.200(11) 0.006(4) 0.006(5) -0.017(5)
    F2 0.039(4) 0.172(9) 0.058(5) 0.003(5) -0.002(3) 0.055(5)
    F3 0.020(3) 0.064(4) 0.052(4) -0.002(3) 0.001(3) -0.001(3)
    F4 0.031(3) 0.061(4) 0.033(3) 0.008(3) 0.008(2) -0.007(3)
    F5 0.041(3) 0.042(4) 0.055(4) 0.007(3) 0.002(3) 0.000(3)
    F6 0.033(3) 0.078(5) 0.058(4) 0.004(3) -0.019(3) -0.023(3)
    O2 0.038(4) 0.040(4) 0.030(4) 0.001(3) -0.006(3) -0.005(3)
    O3 0.030(3) 0.032(4) 0.022(3) -0.005(3) 0.009(3) -0.003(3)
    O4 0.032(4) 0.032(4) 0.033(4) 0.006(3) 0.008(3) -0.002(3)
    O5 0.034(4) 0.156(9) 0.018(4) -0.016(5) -0.003(3) 0.009(4)
    O6 0.033(4) 0.043(4) 0.083(6) 0.002(3) -0.011(4) -0.025(4)
    O7 0.026(3) 0.049(4) 0.046(4) -0.005(3) 0.002(3) -0.017(3)
    O8 0.032(4) 0.031(4) 0.039(4) -0.001(3) 0.003(3) -0.011(3)
    O9 0.027(3) 0.042(4) 0.026(3) -0.003(3) -0.003(3) -0.004(3)
    O10 0.033(4) 0.045(4) 0.019(3) 0.007(3) 0.008(3) -0.007(3)
    N1 0.025(4) 0.033(4) 0.021(4) -0.005(3) 0.007(3) -0.008(3)
    N2 0.025(4) 0.036(4) 0.017(4) 0.003(3) 0.006(3) -0.005(3)
    C1 0.023(5) 0.039(5) 0.018(4) -0.014(4) 0.008(3) -0.006(4)
    C2 0.029(5) 0.028(5) 0.021(4) -0.006(4) -0.004(4) 0.004(4)
    O1 0.039(4) 0.033(4) 0.025(3) 0.002(3) -0.001(3) -0.006(3)
    C11 0.031(5) 0.027(5) 0.028(5) 0.003(4) 0.000(4) -0.009(4)
    C12 0.031(5) 0.033(5) 0.042(6) -0.001(4) 0.005(4) -0.013(4)
    C13 0.037(5) 0.032(5) 0.032(5) 0.003(4) 0.008(4) -0.008(4)
    C14 0.047(6) 0.029(5) 0.031(5) -0.011(4) 0.009(5) -0.010(4)
    C15 0.038(5) 0.031(5) 0.030(5) -0.005(4) 0.005(4) -0.003(4)
    C16 0.029(5) 0.039(6) 0.042(6) -0.009(4) 0.014(4) -0.015(5)
    C17 0.023(4) 0.036(5) 0.019(4) -0.001(4) 0.002(3) -0.004(4)
    C18 0.026(5) 0.044(6) 0.015(4) -0.013(4) 0.003(3) -0.005(4)
    C19 0.023(4) 0.033(5) 0.025(5) 0.002(4) -0.003(4) -0.001(4)
    C20 0.031(5) 0.035(5) 0.028(5) -0.001(4) -0.001(4) -0.011(4)
    C21 0.035(5) 0.035(5) 0.032(5) -0.003(4) -0.002(4) 0.000(4)
    C22 0.030(5) 0.037(5) 0.029(5) -0.004(4) 0.001(4) -0.001(4)
    C23 0.018(4) 0.036(5) 0.020(4) -0.002(4) 0.006(3) -0.007(4)
    C24 0.026(5) 0.034(5) 0.023(4) -0.004(4) 0.000(4) -0.002(4)
    C25 0.022(5) 0.047(6) 0.022(4) -0.003(4) 0.002(4) -0.013(4)
    C26 0.026(5) 0.038(5) 0.022(4) -0.010(4) 0.005(4) -0.008(4)
    C27 0.028(5) 0.036(5) 0.021(4) -0.002(4) 0.000(4) -0.015(4)
    C28 0.024(5) 0.044(6) 0.029(5) -0.002(4) 0.003(4) -0.008(4)
    C29 0.024(5) 0.047(6) 0.023(5) -0.006(4) 0.010(4) -0.006(4)
    C30 0.026(5) 0.056(7) 0.017(4) -0.001(4) 0.008(4) -0.010(4)
    C31 0.031(5) 0.045(6) 0.029(5) 0.002(4) -0.005(4) -0.012(4)
    C32 0.029(5) 0.038(5) 0.019(4) -0.003(4) 0.003(4) -0.005(4)
    C33 0.022(5) 0.042(6) 0.035(5) 0.001(4) -0.005(4) -0.007(4)
    C34 0.024(5) 0.045(7) 0.074(8) -0.006(5) 0.007(5) -0.003(6)
    C35 0.033(5) 0.050(6) 0.036(5) -0.007(5) 0.002(4) 0.001(5)
    C36 0.070(8) 0.053(7) 0.042(6) 0.007(6) -0.008(6) -0.011(5)
    C37 0.043(6) 0.048(7) 0.073(8) 0.003(5) -0.027(6) -0.011(6)
    C38 0.043(6) 0.049(6) 0.033(5) 0.007(5) 0.012(5) -0.005(5)
    C3 0.032(5) 0.025(5) 0.026(5) -0.009(4) 0.001(4) -0.005(4)
    C4 0.032(5) 0.038(5) 0.033(5) -0.005(4) -0.007(4) -0.012(4)
    C5 0.028(5) 0.045(6) 0.037(5) -0.005(4) -0.001(4) -0.008(5)
    C6 0.019(4) 0.037(5) 0.030(5) -0.003(4) 0.003(4) -0.004(4)
    C7 0.034(5) 0.027(5) 0.020(4) -0.006(4) 0.000(4) 0.000(4)
    C8 0.030(5) 0.030(5) 0.021(4) -0.001(4) -0.004(4) -0.002(4)
    C9 0.033(5) 0.035(5) 0.031(5) -0.006(4) -0.001(4) -0.005(4)
    C10 0.028(5) 0.028(5) 0.031(5) -0.005(4) 0.002(4) -0.004(4)

_geom_special_details                   
;

All esds (except the esd in the dihedral angle between two l.s. planes)
are estimated using the full covariance matrix.  The cell esds are taken
into account individually in the estimation of esds in distances, angles
and torsion angles; correlations between esds in cell parameters are only
used when they are defined by crystal symmetry.  An approximate (isotropic)
treatment of cell esds is used for estimating esds involving l.s. planes.
;

loop_
    _geom_bond_atom_site_label_1
    _geom_bond_atom_site_label_2
    _geom_bond_site_symmetry_2
    _geom_bond_distance
    _geom_bond_publ_flag
    Ag1 O5 . 2.254(7) ?
    Ag1 N1 . 2.266(8) ?
    Ag1 O8 . 2.359(6) ?
    Ag1 C3 . 2.699(8) ?
    Ag2 O7 . 2.336(6) ?
    Ag2 O10 . 2.341(6) ?
    Ag2 Se1 2_766 2.5691(10) ?
    Ag2 O9 2_766 2.582(6) ?
    Se1 C17 . 1.941(9) ?
    Se1 C1 . 1.943(8) ?
    Cl1 C35 . 1.730(10) ?
    Cl2 C35 . 1.752(11) ?
    Cl3 C35 . 1.734(11) ?
    Cl4 C36 . 1.755(13) ?
    Cl5 C36 . 1.729(13) ?
    Cl6 C36 . 1.747(12) ?
    Cl7 C37 . 1.738(12) ?
    Cl8 C37 . 1.769(13) ?
    Cl9 C37 . 1.765(11) ?
    Cl10 C38 . 1.740(11) ?
    Cl11 C38 . 1.735(11) ?
    Cl12 C38 . 1.776(11) ?
    S1 O6 . 1.410(7) ?
    S1 O7 . 1.433(7) ?
    S1 O5 . 1.436(7) ?
    S1 C34 . 1.798(12) ?
    S2 O8 . 1.436(7) ?
    S2 O10 . 1.443(6) ?
    S2 O9 . 1.444(6) ?
    S2 C33 . 1.831(9) ?
    F1 C34 . 1.282(13) ?
    F2 C34 . 1.321(14) ?
    F3 C34 . 1.329(11) ?
    F4 C33 . 1.326(11) ?
    F5 C33 . 1.321(11) ?
    F6 C33 . 1.311(10) ?
    O2 C9 . 1.208(11) ?
    O3 C26 . 1.386(11) ?
    O3 C25 . 1.405(10) ?
    O4 C25 . 1.195(11) ?
    N1 C10 . 1.277(11) ?
    N1 C8 . 1.420(11) ?
    N2 C26 . 1.298(11) ?
    N2 C24 . 1.403(11) ?
    C1 C6 . 1.359(13) ?
    C1 C2 . 1.402(12) ?
    C2 C3 . 1.414(12) ?
    C2 C7 . 1.472(13) ?
    O1 C9 . 1.381(11) ?
    O1 C10 . 1.387(11) ?
    C11 C12 . 1.372(12) ?
    C11 C16 . 1.375(14) ?
    C11 C10 . 1.451(12) ?
    C12 C13 . 1.373(13) ?
    C13 C14 . 1.374(14) ?
    C14 C15 . 1.400(13) ?
    C15 C16 . 1.395(13) ?
    C17 C22 . 1.362(13) ?
    C17 C18 . 1.410(11) ?
    C18 C19 . 1.400(13) ?
    C18 C23 . 1.450(12) ?
    C19 C20 . 1.384(13) ?
    C20 C21 . 1.382(13) ?
    C21 C22 . 1.392(13) ?
    C23 C24 . 1.346(11) ?
    C24 C25 . 1.470(13) ?
    C26 C27 . 1.450(12) ?
    C27 C32 . 1.385(13) ?
    C27 C28 . 1.391(13) ?
    C28 C29 . 1.388(12) ?
    C29 C30 . 1.372(14) ?
    C30 C31 . 1.374(13) ?
    C31 C32 . 1.395(12) ?
    C3 C4 . 1.371(13) ?
    C4 C5 . 1.371(13) ?
    C5 C6 . 1.390(13) ?
    C7 C8 . 1.336(12) ?
    C8 C9 . 1.455(13) ?

loop_
    _geom_angle_atom_site_label_1
    _geom_angle_atom_site_label_2
    _geom_angle_atom_site_label_3
    _geom_angle_site_symmetry_1
    _geom_angle_site_symmetry_3
    _geom_angle
    _geom_angle_publ_flag
    O5 Ag1 N1 . . 134.9(3) ?
    O5 Ag1 O8 . . 98.1(3) ?
    N1 Ag1 O8 . . 126.9(2) ?
    O5 Ag1 C3 . . 101.8(3) ?
    N1 Ag1 C3 . . 74.9(3) ?
    O8 Ag1 C3 . . 93.5(2) ?
    O7 Ag2 O10 . . 108.1(2) ?
    O7 Ag2 Se1 . 2_766 115.59(16) ?
    O10 Ag2 Se1 . 2_766 125.86(16) ?
    O7 Ag2 O9 . 2_766 86.5(2) ?
    O10 Ag2 O9 . 2_766 92.5(2) ?
    Se1 Ag2 O9 2_766 2_766 119.69(13) ?
    C17 Se1 C1 . . 99.3(4) ?
    C17 Se1 Ag2 . 2_766 103.2(3) ?
    C1 Se1 Ag2 . 2_766 97.2(2) ?
    O6 S1 O7 . . 113.3(4) ?
    O6 S1 O5 . . 116.2(6) ?
    O7 S1 O5 . . 113.9(4) ?
    O6 S1 C34 . . 105.1(5) ?
    O7 S1 C34 . . 104.1(5) ?
    O5 S1 C34 . . 102.2(5) ?
    O8 S2 O10 . . 115.5(4) ?
    O8 S2 O9 . . 113.4(4) ?
    O10 S2 O9 . . 114.0(4) ?
    O8 S2 C33 . . 104.7(4) ?
    O10 S2 C33 . . 103.1(4) ?
    O9 S2 C33 . . 104.3(4) ?
    C26 O3 C25 . . 105.3(7) ?
    S1 O5 Ag1 . . 125.4(4) ?
    S1 O7 Ag2 . . 144.4(4) ?
    S2 O8 Ag1 . . 141.9(4) ?
    S2 O9 Ag2 . 2_766 108.2(3) ?
    S2 O10 Ag2 . . 134.4(4) ?
    C10 N1 C8 . . 106.7(8) ?
    C10 N1 Ag1 . . 130.6(6) ?
    C8 N1 Ag1 . . 118.2(5) ?
    C26 N2 C24 . . 105.7(8) ?
    C6 C1 C2 . . 121.5(8) ?
    C6 C1 Se1 . . 121.5(7) ?
    C2 C1 Se1 . . 116.9(7) ?
    C1 C2 C3 . . 117.7(8) ?
    C1 C2 C7 . . 122.0(8) ?
    C3 C2 C7 . . 120.3(8) ?
    C9 O1 C10 . . 105.0(7) ?
    C12 C11 C16 . . 119.4(9) ?
    C12 C11 C10 . . 121.9(9) ?
    C16 C11 C10 . . 118.7(8) ?
    C11 C12 C13 . . 121.6(10) ?
    C12 C13 C14 . . 119.3(9) ?
    C13 C14 C15 . . 120.4(9) ?
    C16 C15 C14 . . 118.7(10) ?
    C11 C16 C15 . . 120.5(9) ?
    C22 C17 C18 . . 121.5(8) ?
    C22 C17 Se1 . . 118.1(6) ?
    C18 C17 Se1 . . 120.4(7) ?
    C19 C18 C17 . . 116.8(8) ?
    C19 C18 C23 . . 121.3(8) ?
    C17 C18 C23 . . 121.9(8) ?
    C20 C19 C18 . . 121.6(8) ?
    C21 C20 C19 . . 120.1(9) ?
    C20 C21 C22 . . 119.1(9) ?
    C17 C22 C21 . . 120.8(9) ?
    C24 C23 C18 . . 128.0(8) ?
    C23 C24 N2 . . 129.5(8) ?
    C23 C24 C25 . . 122.3(8) ?
    N2 C24 C25 . . 108.2(7) ?
    O4 C25 O3 . . 120.9(8) ?
    O4 C25 C24 . . 134.1(8) ?
    O3 C25 C24 . . 105.0(8) ?
    N2 C26 O3 . . 115.7(7) ?
    N2 C26 C27 . . 126.7(9) ?
    O3 C26 C27 . . 117.5(7) ?
    C32 C27 C28 . . 121.2(8) ?
    C32 C27 C26 . . 117.3(8) ?
    C28 C27 C26 . . 121.4(8) ?
    C29 C28 C27 . . 119.1(9) ?
    C30 C29 C28 . . 119.9(9) ?
    C29 C30 C31 . . 120.9(8) ?
    C30 C31 C32 . . 120.4(9) ?
    C27 C32 C31 . . 118.4(9) ?
    F6 C33 F5 . . 108.5(8) ?
    F6 C33 F4 . . 108.1(7) ?
    F5 C33 F4 . . 108.8(8) ?
    F6 C33 S2 . . 110.7(6) ?
    F5 C33 S2 . . 110.8(6) ?
    F4 C33 S2 . . 109.9(6) ?
    F1 C34 F2 . . 105.7(11) ?
    F1 C34 F3 . . 108.5(9) ?
    F2 C34 F3 . . 107.1(10) ?
    F1 C34 S1 . . 112.9(9) ?
    F2 C34 S1 . . 110.3(8) ?
    F3 C34 S1 . . 111.9(8) ?
    Cl1 C35 Cl3 . . 111.2(6) ?
    Cl1 C35 Cl2 . . 110.8(6) ?
    Cl3 C35 Cl2 . . 110.6(6) ?
    Cl5 C36 Cl6 . . 109.6(7) ?
    Cl5 C36 Cl4 . . 111.1(7) ?
    Cl6 C36 Cl4 . . 110.5(7) ?
    Cl7 C37 Cl9 . . 111.4(7) ?
    Cl7 C37 Cl8 . . 108.8(7) ?
    Cl9 C37 Cl8 . . 110.1(6) ?
    Cl11 C38 Cl10 . . 111.4(6) ?
    Cl11 C38 Cl12 . . 110.0(5) ?
    Cl10 C38 Cl12 . . 110.5(6) ?
    C4 C3 C2 . . 120.2(8) ?
    C4 C3 Ag1 . . 100.2(6) ?
    C2 C3 Ag1 . . 89.4(5) ?
    C3 C4 C5 . . 120.6(9) ?
    C4 C5 C6 . . 120.3(9) ?
    C1 C6 C5 . . 119.7(9) ?
    C8 C7 C2 . . 124.7(8) ?
    C7 C8 N1 . . 126.6(8) ?
    C7 C8 C9 . . 127.3(8) ?
    N1 C8 C9 . . 106.0(7) ?
    O2 C9 O1 . . 119.8(9) ?
    O2 C9 C8 . . 133.1(9) ?
    O1 C9 C8 . . 107.0(8) ?
    N1 C10 O1 . . 115.3(8) ?
    N1 C10 C11 . . 128.0(9) ?
    O1 C10 C11 . . 116.7(8) ?

loop_
    _geom_torsion_atom_site_label_1
    _geom_torsion_atom_site_label_2
    _geom_torsion_atom_site_label_3
    _geom_torsion_atom_site_label_4
    _geom_torsion_site_symmetry_1
    _geom_torsion_site_symmetry_2
    _geom_torsion_site_symmetry_3
    _geom_torsion_site_symmetry_4
    _geom_torsion
    _geom_torsion_publ_flag
    O6 S1 O5 Ag1 . . . . 98.3(7) ?
    O7 S1 O5 Ag1 . . . . -36.2(9) ?
    C34 S1 O5 Ag1 . . . . -147.9(7) ?
    O6 S1 O7 Ag2 . . . . -159.7(7) ?
    O5 S1 O7 Ag2 . . . . -23.8(10) ?
    C34 S1 O7 Ag2 . . . . 86.7(9) ?
    O10 S2 O8 Ag1 . . . . 14.7(8) ?
    O9 S2 O8 Ag1 . . . . -119.6(6) ?
    C33 S2 O8 Ag1 . . . . 127.3(6) ?
    O8 S2 O9 Ag2 . . . 2_766 5.9(4) ?
    O10 S2 O9 Ag2 . . . 2_766 -129.1(3) ?
    C33 S2 O9 Ag2 . . . 2_766 119.2(4) ?
    O8 S2 O10 Ag2 . . . . -35.1(7) ?
    O9 S2 O10 Ag2 . . . . 98.8(6) ?
    C33 S2 O10 Ag2 . . . . -148.7(5) ?
    C6 C1 C2 C3 . . . . 0.0(12) ?
    Se1 C1 C2 C3 . . . . -177.3(6) ?
    C6 C1 C2 C7 . . . . 179.2(8) ?
    Se1 C1 C2 C7 . . . . 1.8(11) ?
    C16 C11 C12 C13 . . . . -1.7(14) ?
    C10 C11 C12 C13 . . . . 177.5(9) ?
    C11 C12 C13 C14 . . . . 3.5(14) ?
    C12 C13 C14 C15 . . . . -2.6(14) ?
    C13 C14 C15 C16 . . . . -0.1(13) ?
    C12 C11 C16 C15 . . . . -1.1(14) ?
    C10 C11 C16 C15 . . . . 179.7(8) ?
    C14 C15 C16 C11 . . . . 1.9(14) ?
    C22 C17 C18 C19 . . . . 1.9(13) ?
    Se1 C17 C18 C19 . . . . -178.6(6) ?
    C22 C17 C18 C23 . . . . -178.5(8) ?
    Se1 C17 C18 C23 . . . . 1.0(11) ?
    C17 C18 C19 C20 . . . . -2.0(13) ?
    C23 C18 C19 C20 . . . . 178.4(8) ?
    C18 C19 C20 C21 . . . . 1.3(13) ?
    C19 C20 C21 C22 . . . . -0.5(14) ?
    C18 C17 C22 C21 . . . . -1.1(14) ?
    Se1 C17 C22 C21 . . . . 179.4(7) ?
    C20 C21 C22 C17 . . . . 0.4(14) ?
    C19 C18 C23 C24 . . . . 7.3(14) ?
    C17 C18 C23 C24 . . . . -172.3(9) ?
    C18 C23 C24 N2 . . . . 3.1(15) ?
    C18 C23 C24 C25 . . . . -178.9(8) ?
    C26 N2 C24 C23 . . . . 177.8(9) ?
    C26 N2 C24 C25 . . . . -0.4(9) ?
    C26 O3 C25 O4 . . . . 177.1(8) ?
    C26 O3 C25 C24 . . . . -1.3(8) ?
    C23 C24 C25 O4 . . . . 4.7(16) ?
    N2 C24 C25 O4 . . . . -177.0(10) ?
    C23 C24 C25 O3 . . . . -177.2(8) ?
    N2 C24 C25 O3 . . . . 1.1(9) ?
    C24 N2 C26 O3 . . . . -0.5(10) ?
    C24 N2 C26 C27 . . . . 174.8(8) ?
    C25 O3 C26 N2 . . . . 1.2(10) ?
    C25 O3 C26 C27 . . . . -174.5(7) ?
    N2 C26 C27 C32 . . . . -2.0(14) ?
    O3 C26 C27 C32 . . . . 173.2(7) ?
    N2 C26 C27 C28 . . . . -179.7(9) ?
    O3 C26 C27 C28 . . . . -4.4(12) ?
    C32 C27 C28 C29 . . . . -1.6(13) ?
    C26 C27 C28 C29 . . . . 175.9(8) ?
    C27 C28 C29 C30 . . . . 0.3(14) ?
    C28 C29 C30 C31 . . . . 1.0(14) ?
    C29 C30 C31 C32 . . . . -1.1(14) ?
    C28 C27 C32 C31 . . . . 1.6(13) ?
    C26 C27 C32 C31 . . . . -176.1(8) ?
    C30 C31 C32 C27 . . . . -0.3(13) ?
    O8 S2 C33 F6 . . . . -53.3(8) ?
    O10 S2 C33 F6 . . . . 67.9(7) ?
    O9 S2 C33 F6 . . . . -172.6(7) ?
    O8 S2 C33 F5 . . . . -173.7(6) ?
    O10 S2 C33 F5 . . . . -52.5(7) ?
    O9 S2 C33 F5 . . . . 66.9(7) ?
    O8 S2 C33 F4 . . . . 66.1(7) ?
    O10 S2 C33 F4 . . . . -172.7(6) ?
    O9 S2 C33 F4 . . . . -53.3(7) ?
    O6 S1 C34 F1 . . . . -170.4(8) ?
    O7 S1 C34 F1 . . . . -51.0(9) ?
    O5 S1 C34 F1 . . . . 67.8(9) ?
    O6 S1 C34 F2 . . . . -52.4(9) ?
    O7 S1 C34 F2 . . . . 67.0(9) ?
    O5 S1 C34 F2 . . . . -174.2(8) ?
    O6 S1 C34 F3 . . . . 66.8(9) ?
    O7 S1 C34 F3 . . . . -173.8(8) ?
    O5 S1 C34 F3 . . . . -55.0(9) ?
    C1 C2 C3 C4 . . . . -0.5(12) ?
    C7 C2 C3 C4 . . . . -179.6(8) ?
    C1 C2 C3 Ag1 . . . . 101.0(7) ?
    C7 C2 C3 Ag1 . . . . -78.1(7) ?
    C2 C3 C4 C5 . . . . 0.7(14) ?
    Ag1 C3 C4 C5 . . . . -94.6(9) ?
    C3 C4 C5 C6 . . . . -0.5(15) ?
    C2 C1 C6 C5 . . . . 0.1(13) ?
    Se1 C1 C6 C5 . . . . 177.4(7) ?
    C4 C5 C6 C1 . . . . 0.1(14) ?
    C1 C2 C7 C8 . . . . -139.8(9) ?
    C3 C2 C7 C8 . . . . 39.3(13) ?
    C2 C7 C8 N1 . . . . 5.7(14) ?
    C2 C7 C8 C9 . . . . -172.5(8) ?
    C10 N1 C8 C7 . . . . -177.6(9) ?
    Ag1 N1 C8 C7 . . . . 23.9(12) ?
    C10 N1 C8 C9 . . . . 0.8(9) ?
    Ag1 N1 C8 C9 . . . . -157.7(5) ?
    C10 O1 C9 O2 . . . . 178.6(8) ?
    C10 O1 C9 C8 . . . . 0.6(9) ?
    C7 C8 C9 O2 . . . . 0.0(17) ?
    N1 C8 C9 O2 . . . . -178.5(10) ?
    C7 C8 C9 O1 . . . . 177.6(9) ?
    N1 C8 C9 O1 . . . . -0.9(9) ?
    C8 N1 C10 O1 . . . . -0.5(10) ?
    Ag1 N1 C10 O1 . . . . 154.4(6) ?
    C8 N1 C10 C11 . . . . 178.0(9) ?
    Ag1 N1 C10 C11 . . . . -27.1(14) ?
    C9 O1 C10 N1 . . . . -0.1(10) ?
    C9 O1 C10 C11 . . . . -178.8(8) ?
    C12 C11 C10 N1 . . . . 170.8(9) ?
    C16 C11 C10 N1 . . . . -10.0(14) ?
    C12 C11 C10 O1 . . . . -10.7(13) ?
    C16 C11 C10 O1 . . . . 168.5(8) ?

_shelx_res_file                         
;

TITL mo_ale288_0m_a.res in P-1
    mo_ale288_0m_a.res
    created by SHELXL-2019/1 at 12:07:41 on 03-Aug-2022
REM Old TITL mo_ale288_0m in P-1
REM SHELXT solution in P-1: R1 0.174, Rweak 0.016, Alpha 0.118
REM <I/s>   0.000 for    0 systematic absences,  Orientation as input
REM Formula found by SHELXT:  C39 Ag2 F6 N2 O9 S14 Se
CELL  0.71073  11.2955  13.2811  17.9029   84.806   81.693   88.358
ZERR    1.000   0.0013   0.0015   0.0020    0.003    0.003    0.004
LATT  1
SFAC C H AG F N O S SE Cl
UNIT 76 48 4 12 4 20 4 2 24
TEMP -173.150
L.S. 10
BOND
LIST 4
acta
omit 0 50
conf
size 0.081 0.064 0.023
FMAP 2
PLAN 20
WGHT    0.066900   33.535801
FVAR       0.27323
AG1   3    0.855499    0.312073    0.493867    11.00000    0.03497    0.03421 =
         0.02491   -0.00440   -0.00018    0.00080
AG2   3    1.016366    0.515368    0.339862    11.00000    0.02422    0.04248 =
         0.02278   -0.00477    0.00550   -0.00626
SE1   8    0.821186    0.406715    0.762689    11.00000    0.02085    0.03508 =
         0.01671   -0.00537    0.00445   -0.00377
CL1   9    0.629194    0.085619    0.452320    11.00000    0.13552    0.07197 =
         0.04349   -0.01479   -0.01581    0.02347
CL2   9    0.580314   -0.060481    0.352742    11.00000    0.06402    0.05047 =
         0.08074   -0.01141    0.00086   -0.01232
CL3   9    0.516257    0.148035    0.322440    11.00000    0.05860    0.06382 =
         0.12403    0.02222   -0.04154   -0.01366
CL4   9    0.911420    0.091780    0.118273    11.00000    0.08157    0.07425 =
         0.08846   -0.02576   -0.03647    0.02128
CL5   9    0.661510    0.045436    0.135775    11.00000    0.09890    0.06010 =
         0.13448    0.00016    0.02464   -0.01859
CL6   9    0.741472    0.235609    0.063581    11.00000    0.07017    0.05586 =
         0.06107    0.00272   -0.01686    0.00036
CL7   9    1.133543    0.304331    0.758221    11.00000    0.08834    0.04700 =
         0.14749   -0.00514   -0.07637    0.00206
CL8   9    1.142431    0.199433    0.903464    11.00000    0.05626    0.09077 =
         0.09139   -0.04506   -0.00101   -0.00896
CL9   9    1.362812    0.240427    0.801896    11.00000    0.04050    0.07204 =
         0.05765   -0.01776   -0.01371    0.00188
CL10  9    0.698349   -0.065833    0.923393    11.00000    0.07986    0.04594 =
         0.05536    0.00613    0.00788   -0.00590
CL11  9    0.859850    0.100183    0.886443    11.00000    0.04301    0.07652 =
         0.04820   -0.00399    0.00083   -0.00628
CL12  9    0.644926    0.100863    0.817665    11.00000    0.04862    0.06837 =
         0.03313   -0.00637    0.00266    0.01693
S1    7    0.787801    0.340428    0.319819    11.00000    0.02263    0.04393 =
         0.02422   -0.00661    0.00015   -0.00337
S2    7    0.856294    0.579753    0.512170    11.00000    0.02173    0.03438 =
         0.02275   -0.00425    0.00187   -0.00059
F1    4    0.680051    0.513051    0.300922    11.00000    0.04950    0.04686 =
         0.19966   -0.01665    0.00623    0.00552
F2    4    0.700675    0.431379    0.206288    11.00000    0.03851    0.17163 =
         0.05769    0.05454   -0.00176    0.00302
F3    4    0.568343    0.387753    0.300221    11.00000    0.02038    0.06431 =
         0.05176   -0.00057    0.00067   -0.00229
F4    4    0.668637    0.642893    0.598348    11.00000    0.03132    0.06150 =
         0.03319   -0.00714    0.00797    0.00818
F5    4    0.723620    0.742653    0.498562    11.00000    0.04146    0.04192 =
         0.05464   -0.00010    0.00154    0.00672
F6    4    0.634425    0.605299    0.490064    11.00000    0.03317    0.07772 =
         0.05787   -0.02312   -0.01896    0.00422
O2    6    1.103999    0.082094    0.696159    11.00000    0.03811    0.03998 =
         0.03022   -0.00471   -0.00577    0.00131
O3    6    0.342994    0.287806    1.004682    11.00000    0.03008    0.03241 =
         0.02184   -0.00315    0.00869   -0.00454
O4    6    0.516255    0.206469    0.964663    11.00000    0.03188    0.03174 =
         0.03272   -0.00185    0.00761    0.00570
O5    6    0.742714    0.332058    0.399301    11.00000    0.03388    0.15559 =
         0.01827    0.00873   -0.00259   -0.01624
O6    6    0.787548    0.251333    0.282614    11.00000    0.03280    0.04332 =
         0.08289   -0.02490   -0.01065    0.00244
O7    6    0.897348    0.394810    0.300811    11.00000    0.02601    0.04905 =
         0.04577   -0.01665    0.00158   -0.00526
O8    6    0.828352    0.475767    0.535429    11.00000    0.03232    0.03093 =
         0.03937   -0.01103    0.00314   -0.00131
O9    6    0.926248    0.624701    0.561521    11.00000    0.02654    0.04153 =
         0.02578   -0.00363   -0.00306   -0.00283
O10   6    0.898190    0.602180    0.432530    11.00000    0.03303    0.04485 =
         0.01915   -0.00665    0.00752    0.00650
N1    5    0.956838    0.180799    0.546406    11.00000    0.02527    0.03268 =
         0.02111   -0.00833    0.00676   -0.00459
N2    5    0.381904    0.447634    0.951736    11.00000    0.02488    0.03619 =
         0.01737   -0.00498    0.00600    0.00337
C1    1    0.723509    0.353309    0.695029    11.00000    0.02327    0.03923 =
         0.01848   -0.00572    0.00849   -0.01390
C2    1    0.766147    0.265644    0.661229    11.00000    0.02908    0.02784 =
         0.02072    0.00356   -0.00397   -0.00597
O1    6    1.116883    0.084475    0.569827    11.00000    0.03923    0.03321 =
         0.02463   -0.00610   -0.00062    0.00154
C11   1    1.082330    0.110422    0.439381    11.00000    0.03121    0.02692 =
         0.02838   -0.00942   -0.00005    0.00304
C12   1    1.190112    0.065372    0.414954    11.00000    0.03130    0.03262 =
         0.04239   -0.01308    0.00487   -0.00060
AFIX  43
H12   2    1.244467    0.048349    0.450125    11.00000   -1.20000
AFIX   0
C13   1    1.221316    0.044303    0.340963    11.00000    0.03673    0.03165 =
         0.03211   -0.00818    0.00791    0.00343
AFIX  43
H13   2    1.294401    0.009719    0.325764    11.00000   -1.20000
AFIX   0
C14   1    1.145733    0.073761    0.289102    11.00000    0.04666    0.02915 =
         0.03125   -0.00993    0.00885   -0.01116
AFIX  43
H14   2    1.168222    0.061929    0.237388    11.00000   -1.20000
AFIX   0
C15   1    1.035766    0.121112    0.311988    11.00000    0.03791    0.03055 =
         0.02962   -0.00329    0.00501   -0.00502
AFIX  43
H15   2    0.983340    0.141632    0.276269    11.00000   -1.20000
AFIX   0
C16   1    1.004696    0.137566    0.388229    11.00000    0.02865    0.03936 =
         0.04192   -0.01492    0.01449   -0.00915
AFIX  43
H16   2    0.929378    0.167735    0.404947    11.00000   -1.20000
AFIX   0
C17   1    0.722369    0.522667    0.791891    11.00000    0.02266    0.03590 =
         0.01890   -0.00409    0.00213   -0.00072
C18   1    0.619193    0.509896    0.846242    11.00000    0.02552    0.04357 =
         0.01550   -0.00507    0.00300   -0.01279
C19   1    0.551434    0.597076    0.862867    11.00000    0.02317    0.03342 =
         0.02528   -0.00083   -0.00333    0.00193
AFIX  43
H19   2    0.479917    0.591156    0.898014    11.00000   -1.20000
AFIX   0
C20   1    0.586130    0.691679    0.829329    11.00000    0.03113    0.03491 =
         0.02767   -0.01150   -0.00136   -0.00129
AFIX  43
H20   2    0.539444    0.749810    0.842386    11.00000   -1.20000
AFIX   0
C21   1    0.688538    0.701718    0.776898    11.00000    0.03500    0.03452 =
         0.03188    0.00007   -0.00247   -0.00255
AFIX  43
H21   2    0.712392    0.766424    0.753457    11.00000   -1.20000
AFIX   0
C22   1    0.756287    0.615795    0.758876    11.00000    0.03044    0.03718 =
         0.02868   -0.00073    0.00090   -0.00378
AFIX  43
H22   2    0.827060    0.622181    0.723105    11.00000   -1.20000
AFIX   0
C23   1    0.583938    0.411370    0.883078    11.00000    0.01840    0.03560 =
         0.01960   -0.00716    0.00577   -0.00178
AFIX  43
H23   2    0.639540    0.357477    0.873314    11.00000   -1.20000
AFIX   0
C24   1    0.482147    0.386839    0.929402    11.00000    0.02608    0.03400 =
         0.02337   -0.00243   -0.00045   -0.00354
C25   1    0.458843    0.283430    0.964042    11.00000    0.02229    0.04659 =
         0.02203   -0.01337    0.00213   -0.00327
C26   1    0.306223    0.387963    0.994478    11.00000    0.02572    0.03758 =
         0.02203   -0.00831    0.00511   -0.01023
C27   1    0.192442    0.416874    1.036217    11.00000    0.02826    0.03553 =
         0.02147   -0.01487    0.00010   -0.00157
C28   1    0.118857    0.345745    1.080688    11.00000    0.02361    0.04385 =
         0.02901   -0.00817    0.00331   -0.00224
AFIX  43
H28   2    0.139720    0.275871    1.081886    11.00000   -1.20000
AFIX   0
C29   1    0.014525    0.378204    1.123299    11.00000    0.02405    0.04666 =
         0.02341   -0.00580    0.01001   -0.00622
AFIX  43
H29   2   -0.036376    0.330495    1.154124    11.00000   -1.20000
AFIX   0
C30   1   -0.014996    0.479277    1.120843    11.00000    0.02618    0.05613 =
         0.01741   -0.01024    0.00789   -0.00109
AFIX  43
H30   2   -0.085831    0.501171    1.150751    11.00000   -1.20000
AFIX   0
C31   1    0.056532    0.549214    1.075707    11.00000    0.03108    0.04496 =
         0.02931   -0.01236   -0.00548    0.00189
AFIX  43
H31   2    0.034087    0.618778    1.074026    11.00000   -1.20000
AFIX   0
C32   1    0.161931    0.518747    1.032314    11.00000    0.02949    0.03810 =
         0.01915   -0.00520    0.00297   -0.00256
AFIX  43
H32   2    0.211577    0.566748    1.000843    11.00000   -1.20000
AFIX   0
C33   1    0.711969    0.646898    0.525268    11.00000    0.02160    0.04207 =
         0.03483   -0.00732   -0.00455    0.00104
C34   1    0.678609    0.422807    0.281061    11.00000    0.02398    0.04512 =
         0.07386   -0.00350    0.00739   -0.00594
C35   1    0.618510    0.064971    0.359499    11.00000    0.03322    0.04955 =
         0.03618    0.00137    0.00155   -0.00738
AFIX  13
H35   2    0.698743    0.077295    0.328695    11.00000   -1.20000
AFIX   0
C36   1    0.764395    0.139868    0.133884    11.00000    0.06993    0.05344 =
         0.04177   -0.01109   -0.00826    0.00705
AFIX  13
H36   2    0.751640    0.169113    0.184026    11.00000   -1.20000
AFIX   0
C37   1    1.210055    0.211309    0.807691    11.00000    0.04267    0.04773 =
         0.07309   -0.01062   -0.02686    0.00291
AFIX  13
H37   2    1.203587    0.145551    0.785545    11.00000   -1.20000
AFIX   0
C38   1    0.711427    0.063809    0.900134    11.00000    0.04290    0.04920 =
         0.03302   -0.00507    0.01174    0.00744
AFIX  13
H38   2    0.667786    0.099355    0.943085    11.00000   -1.20000
AFIX   0
C3    1    0.698786    0.228245    0.609321    11.00000    0.03221    0.02499 =
         0.02591   -0.00467    0.00111   -0.00925
AFIX  43
H3    2    0.725372    0.169262    0.585085    11.00000   -1.20000
AFIX   0
C4    1    0.595203    0.276838    0.593847    11.00000    0.03157    0.03770 =
         0.03268   -0.01164   -0.00709   -0.00490
AFIX  43
H4    2    0.549973    0.250797    0.559332    11.00000   -1.20000
AFIX   0
C5    1    0.556305    0.362682    0.627740    11.00000    0.02837    0.04539 =
         0.03742   -0.00786   -0.00120   -0.00464
AFIX  43
H5    2    0.484765    0.396033    0.616252    11.00000   -1.20000
AFIX   0
C6    1    0.621081    0.401094    0.678813    11.00000    0.01946    0.03692 =
         0.03008   -0.00438    0.00273   -0.00262
AFIX  43
H6    2    0.593888    0.460503    0.702296    11.00000   -1.20000
AFIX   0
C7    1    0.877753    0.213991    0.677558    11.00000    0.03408    0.02655 =
         0.01987   -0.00039    0.00020   -0.00596
AFIX  43
H7    2    0.893659    0.208789    0.728454    11.00000   -1.20000
AFIX   0
C8    1    0.958308    0.173886    0.625883    11.00000    0.03021    0.03028 =
         0.02090   -0.00212   -0.00444   -0.00139
C9    1    1.062979    0.112262    0.639374    11.00000    0.03278    0.03533 =
         0.03065   -0.00473   -0.00113   -0.00590
C10   1    1.046785    0.129276    0.518113    11.00000    0.02783    0.02801 =
         0.03101   -0.00371    0.00175   -0.00454
HKLF 4


REM  mo_ale288_0m_a.res in P-1
REM wR2 = 0.1764, GooF = S = 1.036, Restrained GooF = 1.036 for all data
REM R1 = 0.0669 for 6615 Fo > 4sig(Fo) and 0.1046 for all 9332 data
REM 658 parameters refined using 0 restraints

END

WGHT      0.0669     33.5363

REM Highest difference peak  2.605,  deepest hole -1.647,  1-sigma level  0.172
Q1    1   1.1964  0.2962  0.7017  11.00000  0.05    2.60
Q2    1   1.0197  0.4342  0.3427  11.00000  0.05    1.79
Q3    1   1.0164  0.6044  0.3298  11.00000  0.05    1.57
Q4    1   0.8675  0.2320  0.5053  11.00000  0.05    1.37
Q5    1   0.8637  0.4047  0.4924  11.00000  0.05    1.31
Q6    1   0.8202  0.4862  0.7578  11.00000  0.05    1.30
Q7    1   1.1224  0.2408  0.8569  11.00000  0.05    1.29
Q8    1   0.8276  0.3171  0.7730  11.00000  0.05    0.96
Q9    1   0.9171  0.4452  0.3836  11.00000  0.05    0.82
Q10   1   1.1589  0.1422  0.7167  11.00000  0.05    0.80
Q11   1   0.7721  0.2919  0.4765  11.00000  0.05    0.77
Q12   1   1.2778  0.3113  0.8839  11.00000  0.05    0.76
Q13   1   0.6753  0.6607  0.4384  11.00000  0.05    0.74
Q14   1   0.7558  0.2402  0.4021  11.00000  0.05    0.71
Q15   1   0.0615  0.4196  1.0633  11.00000  0.05    0.71
Q16   1   0.4885  0.1516  0.3817  11.00000  0.05    0.68
Q17   1   1.1008  0.5156  0.3593  11.00000  0.05    0.68
Q18   1   0.8560  0.4175  0.5422  11.00000  0.05    0.67
Q19   1   0.5941  0.0181  0.4444  11.00000  0.05    0.66
Q20   1   0.5747  0.4822  0.2773  11.00000  0.05    0.64
;
_shelx_res_checksum                     2256

_shelx_hkl_file                         
;
  -2   0   0  475.25   30.70
  -2   0   0  560.74   32.30
  -2   0   0  573.94   32.30
  -2   0   0  512.85   31.40
  -2   0   0  549.74   30.80
  -2   0   0  521.15   34.00
  -2   0   0  524.45   34.00
  -2   0   0  582.14   30.50
   2   0   0  480.45   30.80
   2   0   0  576.64   32.40
   2   0   0  542.25   31.30
   2   0   0  533.15   30.50
   2   0   0  462.65   32.90
   2   0   0  559.54   30.50
   2   0   0  569.74   32.30
  -3   0   0   28.50   12.40
  -3   0   0   27.60   13.10
  -3   0   0   20.60    9.40
  -3   0   0   26.10   10.20
  -3   0   0   26.60    9.00
  -3   0   0   25.70    9.20
  -3   0   0   32.10   11.80
  -3   0   0   27.30    9.60
  -3   0   0   32.40    7.60
   3   0   0   27.60    9.40
   3   0   0   15.70    9.30
   3   0   0   22.90   10.60
   3   0   0   20.70    8.70
   3   0   0   21.40   12.40
   3   0   0   16.20    8.30
   3   0   0   31.70    8.70
   3   0   0   28.20   11.00
   3   0   0   20.70    7.80
   3   0   0   43.50   13.30
  -4   0   0 1050.99   63.19
  -4   0   0 1053.69   64.79
  -4   0   0 1089.19   62.19
  -4   0   0 1023.20   65.79
  -4   0   0 1085.99   62.29
  -4   0   0 1002.90   62.19
  -4   0   0 1074.29   60.79
  -4   0   0 1238.08   71.49
  -4   0   0 1097.09   62.89
   4   0   0 1039.20   66.39
   4   0   0 1015.20   66.29
   4   0   0 1036.10   60.19
   4   0   0 1049.59   59.89
   4   0   0 1063.29   62.19
   4   0   0 1046.60   63.79
   4   0   0 1120.39   63.49
   4   0   0 1064.79   63.29
   4   0   0 1047.70   61.49
  -5   0   0   35.70   15.80
  -5   0   0   45.10   16.00
  -5   0   0   40.60   13.30
  -5   0   0   49.90   13.20
  -5   0   0   28.20   16.40
  -5   0   0   35.60   14.70
  -5   0   0   42.90   13.30
  -5   0   0   51.29   15.10
   5   0   0   53.49   12.00
   5   0   0   23.20   15.60
   5   0   0   47.00   21.20
   5   0   0   24.90   12.30
   5   0   0   46.30   15.50
   5   0   0   39.30   13.80
   5   0   0   33.80   15.40
   5   0   0   42.20   12.50
   5   0   0   38.50   16.30
   5   0   0   45.70   13.50
  -6   0   0 1405.66   83.39
  -6   0   0 1317.07   84.49
  -6   0   0 1455.75   84.49
  -6   0   0 1417.96   90.69
  -6   0   0 1508.95   89.09
  -6   0   0 1388.66   90.69
  -6   0   0 1460.85   86.59
  -6   0   0 1524.25   85.19
   6   0   0 1408.96   91.49
   6   0   0 1425.26   86.99
   6   0   0 1455.55   84.29
   6   0   0 1469.75   82.09
   6   0   0 1472.45   82.89
   6   0   0 1466.45   86.79
   6   0   0 1407.96   87.49
   6   0   0 1450.85   92.19
   6   0   0 1422.16   86.49
   6   0   0 1421.36   85.59
  -7   0   0  644.64   55.79
  -7   0   0  572.04   51.19
  -7   0   0  635.54   56.99
  -7   0   0  503.95   47.00
  -7   0   0  659.13   47.50
  -7   0   0  609.34   46.80
  -7   0   0  580.34   47.70
  -7   0   0  683.83   48.20
   7   0   0  570.24   46.00
   7   0   0  746.03   58.99
   7   0   0  629.84   50.29
   7   0   0  645.44   44.90
   7   0   0  621.44   51.19
   7   0   0  628.04   49.90
   7   0   0  640.54   51.89
   7   0   0  605.24   56.29
  -8   0   0  199.78   29.90
  -8   0   0  285.37   33.20
  -8   0   0  236.88   33.90
  -8   0   0  270.77   40.20
  -8   0   0  218.08   37.20
  -8   0   0  209.78   35.10
  -8   0   0  286.77   36.40
  -8   0   0  189.58   35.80
   8   0   0  323.67   46.60
   8   0   0  325.27   54.19
   8   0   0  200.78   45.10
   8   0   0  223.28   30.00
   8   0   0  235.58   29.30
   8   0   0  246.08   30.80
   8   0   0  176.48   30.60
   8   0   0  233.68   33.40
   8   0   0  269.67   44.50
   8   0   0  208.38   31.50
  -9   0   0   25.80   29.40
  -9   0   0   -1.40   19.20
  -9   0   0   20.10   20.30
  -9   0   0    3.10   20.30
  -9   0   0   -2.20   16.70
  -9   0   0   27.90   27.90
  -9   0   0   14.40   24.80
   9   0   0   11.30   21.30
   9   0   0    1.80   17.90
   9   0   0   19.00   27.40
   9   0   0    4.60   18.30
   9   0   0   21.60   21.80
   9   0   0  -12.70   20.40
   9   0   0  -10.60   19.10
 -10   0   0   -0.60   22.10
 -10   0   0    7.60   34.10
 -10   0   0   -9.10   31.60
 -10   0   0   39.60   22.80
 -10   0   0   10.40   21.50
 -10   0   0   20.90   21.80
  10   0   0   28.70   22.90
  10   0   0   85.99   33.50
  10   0   0   -1.40   29.40
  10   0   0   34.40   27.00
  10   0   0  -11.10   21.20
  10   0   0   23.70   25.90
  10   0   0   36.70   22.90
  10   0   0   50.69   26.80
 -11   0   0  -24.00   37.50
 -11   0   0   16.00   31.30
 -11   0   0    0.90   25.40
  11   0   0    1.80   22.70
  11   0   0    0.90   25.30
  11   0   0   32.60   44.00
  11   0   0    6.40   23.70
  11   0   0    1.80   24.60
  11   0   0  -21.70   31.20
  11   0   0  -31.50   29.00
 -12   0   0    3.30   36.80
 -12   0   0  -24.90   24.60
 -12   0   0  -30.80   24.20
 -12   0   0   23.40   41.40
  12   0   0  -23.90   37.40
  12   0   0   -8.50   30.30
  12   0   0   -6.20   32.10
  12   0   0   -8.40   28.70
  12   0   0  -18.90   26.10
  12   0   0  -47.70   27.80
 -13   0   0   35.60   40.40
 -13   0   0  -59.99   35.50
 -13   0   0  -25.40   27.70
 -13   0   0   -2.30   42.70
  13   0   0   27.90   36.20
  13   0   0   -3.10   32.00
  13   0   0    5.80   31.10
  13   0   0   -9.00   37.30
  13   0   0  -41.70   39.10
 -14   0   0   66.89   40.80
 -14   0   0   21.40   45.40
 -14   0   0   -7.50   52.29
 -14   0   0   16.80   36.50
  14   0   0   60.79   42.60
  14   0   0   61.39   34.60
  14   0   0   28.70   44.90
  14   0   0  -15.20   33.70
  14  -1   0  -25.40   31.80
  14  -1   0   -6.10   36.30
  14  -1   0   59.79   51.79
  14  -1   0    7.50   33.70
 -14   1   0  106.39   55.39
 -14   1   0   13.70   40.10
 -14   1   0   25.30   36.80
 -14   1   0  -13.20   46.50
  13  -1   0   -8.40   42.30
  13  -1   0   22.60   30.40
  13  -1   0   22.20   44.20
  13  -1   0  -11.60   29.00
  13  -1   0   21.50   34.00
 -13   1   0   -9.20   45.10
 -13   1   0   68.09   32.50
 -13   1   0   48.40   47.20
 -13   1   0   16.00   33.20
  12  -1   0   -4.30   47.60
  12  -1   0    9.10   44.40
  12  -1   0   32.10   32.20
  12  -1   0  -33.40   33.60
  12  -1   0   57.79   38.70
  12  -1   0   59.99   43.60
 -12   1   0  -32.50   24.20
 -12   1   0  -23.70   37.30
 -12   1   0   -7.10   32.40
 -12   1   0   45.30   60.09
  11  -1   0  128.99   32.20
  11  -1   0   30.00   26.20
  11  -1   0   55.39   32.50
  11  -1   0   53.59   48.60
  11  -1   0   42.30   26.40
  11  -1   0   -7.00   30.40
 -11   1   0   73.59   28.50
 -11   1   0   29.50   33.40
 -11   1   0   15.00   41.30
 -11   1   0  -13.40   38.50
  10  -1   0   64.69   29.60
  10  -1   0   38.50   30.20
  10  -1   0   50.09   32.70
  10  -1   0   18.60   21.30
  10  -1   0   35.50   23.30
  10  -1   0   18.80   35.20
  10  -1   0   23.60   26.00
  10  -1   0   23.90   25.10
 -10   1   0   34.70   21.90
 -10   1   0   23.30   21.80
 -10   1   0   28.50   25.50
 -10   1   0   25.80   30.80
   9  -1   0    9.40   21.60
   9  -1   0   47.50   20.00
   9  -1   0    5.30   18.40
   9  -1   0   21.40   23.70
   9  -1   0   59.09   31.70
   9  -1   0   54.39   26.00
   9  -1   0   55.99   34.80
   9  -1   0    2.20   21.20
  -9   1   0    3.70   22.40
  -9   1   0   -1.10   20.20
  -9   1   0   38.40   20.30
  -9   1   0   41.60   21.90
  -9   1   0    0.90   17.20
  -9   1   0   10.00   26.70
   8  -1   0   45.20   21.00
   8  -1   0   49.70   25.80
   8  -1   0   45.50   19.50
   8  -1   0   67.19   27.40
   8  -1   0   47.90   28.50
   8  -1   0   55.29   19.70
   8  -1   0   48.40   19.00
   8  -1   0   69.49   26.60
   8  -1   0   55.69   24.20
  -8   1   0   70.39   20.10
  -8   1   0   75.79   25.10
  -8   1   0   47.10   30.10
  -8   1   0   49.70   20.50
  -8   1   0   19.20   18.30
  -8   1   0   24.90   18.60
  -8   1   0   65.89   28.00
   7  -1   0  680.23   50.79
   7  -1   0  771.42   61.39
   7  -1   0  679.73   49.60
   7  -1   0  778.72   54.89
   7  -1   0  594.34   60.39
   7  -1   0  752.82   63.29
   7  -1   0  678.13   60.19
   7  -1   0  724.13   54.39
   7  -1   0  726.53   57.19
  -7   1   0  618.04   56.89
  -7   1   0  732.23   51.69
  -7   1   0  796.72   62.49
  -7   1   0  682.63   53.39
  -7   1   0  640.24   48.10
  -7   1   0  713.43   56.29
  -7   1   0  672.83   51.09
  -7   1   0  728.83   61.59
  -7   1   0  754.62   56.09
   6  -1   0  736.03   54.49
   6  -1   0  790.82   56.39
   6  -1   0  750.32   48.80
   6  -1   0  679.03   59.19
   6  -1   0  794.42   60.89
   6  -1   0  781.32   53.39
   6  -1   0  682.43   55.19
   6  -1   0  730.13   50.69
   6  -1   0  751.82   52.69
  -6   1   0  744.53   53.89
  -6   1   0  698.13   55.49
  -6   1   0  789.12   51.19
  -6   1   0  815.72   54.59
  -6   1   0  681.23   47.50
  -6   1   0  781.72   51.29
  -6   1   0  701.53   58.29
  -6   1   0  688.83   52.09
  -6   1   0  761.02   59.69
   5  -1   0 1085.89   67.19
   5  -1   0 1013.90   60.79
   5  -1   0  916.21   68.19
   5  -1   0 1105.79   65.09
   5  -1   0 1062.39   64.29
   5  -1   0 1009.00   70.99
   5  -1   0 1024.90   67.29
   5  -1   0  992.70   65.39
   5  -1   0 1084.39   65.79
  -5   1   0 1084.69   66.19
  -5   1   0 1042.70   67.99
  -5   1   0 1077.89   70.69
  -5   1   0  973.70   62.39
  -5   1   0 1099.09   64.09
  -5   1   0 1139.99   71.49
  -5   1   0 1048.60   65.69
  -5   1   0 1111.69   66.39
  -5   1   0 1054.19   60.79
   4  -1   0  110.19   18.80
   4  -1   0  112.89   17.80
   4  -1   0  120.59   22.40
   4  -1   0   97.49   15.00
   4  -1   0  111.39   18.00
   4  -1   0  110.29   17.00
   4  -1   0  107.09   13.90
   4  -1   0   97.69   20.40
   4  -1   0  114.59   19.90
  -4   1   0  138.99   16.20
  -4   1   0  106.19   17.10
  -4   1   0  114.59   18.10
  -4   1   0  119.39   15.90
  -4   1   0  109.39   16.30
  -4   1   0  106.29   20.00
  -4   1   0  111.99   22.60
  -4   1   0  114.89   22.70
   3  -1   0  312.77   26.40
   3  -1   0  328.97   24.90
   3  -1   0  284.77   21.10
   3  -1   0  288.07   27.70
   3  -1   0  296.57   29.70
   3  -1   0  329.57   27.80
   3  -1   0  266.27   23.30
   3  -1   0  275.67   29.90
   3  -1   0  306.07   24.40
  -3   1   0  294.87   24.70
  -3   1   0  336.67   30.50
  -3   1   0  280.57   22.50
  -3   1   0  325.87   28.00
  -3   1   0  336.77   30.30
  -3   1   0  294.87   24.10
  -3   1   0  293.57   25.50
  -3   1   0  246.88   20.50
  -3   1   0  312.97   26.30
   2  -1   0  351.56   25.10
   2  -1   0  322.07   23.60
   2  -1   0  314.37   26.70
   2  -1   0  357.16   23.30
   2  -1   0  353.46   25.20
   2  -1   0  368.96   26.40
   2  -1   0  341.17   23.50
   2  -1   0  312.37   26.10
  -2   1   0  323.97   26.40
  -2   1   0  329.57   23.60
  -2   1   0  295.77   24.10
  -2   1   0  371.26   26.50
  -2   1   0  383.76   23.40
  -2   1   0  316.07   26.50
  -2   1   0  392.36   25.10
  -2   1   0  329.07   23.90
   1  -1   0 2880.51  148.19
   1  -1   0 2855.71  147.89
   1  -1   0 2646.24  148.09
   1  -1   0 3194.28  149.39
   1  -1   0 3009.60  148.69
   1  -1   0 2869.51  149.88
   1  -1   0 2829.42  148.69
  -1   1   0 2975.70  148.59
  -1   1   0 2693.83  149.59
  -1   1   0 2956.90  148.59
  -1   1   0 3010.20  147.99
  -1   1   0 2887.81  149.88
  -1   1   0 3149.28  149.39
  -1  -1   0   86.29    7.00
  -1  -1   0   81.59    7.20
  -1  -1   0   60.29    9.40
  -1  -1   0   65.89    8.00
  -1  -1   0   84.79    7.20
  -1  -1   0   66.59   10.10
  -1  -1   0   67.09    8.40
  -1  -1   0   73.59    6.60
   1   1   0   84.89    7.10
   1   1   0   91.49   10.00
   1   1   0   67.79    6.70
   1   1   0   80.89   10.10
   1   1   0   73.29    7.10
   1   1   0   61.49    9.40
   1   1   0   74.69    8.30
   1   1   0   56.59    7.80
   1   1   0   57.69    6.60
   1   1   0   71.19    8.50
  -2  -1   0  266.77   20.80
  -2  -1   0  268.67   18.50
  -2  -1   0  296.77   20.00
  -2  -1   0  241.88   18.80
  -2  -1   0  274.37   21.80
  -2  -1   0  289.47   25.90
  -2  -1   0  303.37   23.20
  -2  -1   0  257.27   18.50
   2   1   0  265.97   21.10
   2   1   0  303.67   25.00
   2   1   0  267.37   20.80
   2   1   0  321.07   20.10
   2   1   0  275.67   20.30
   2   1   0  292.87   19.30
   2   1   0  248.18   18.50
   2   1   0  291.27   21.50
   2   1   0  286.87   19.00
  -3  -1   0   74.19   12.00
  -3  -1   0   77.99   18.60
  -3  -1   0   68.79   14.10
  -3  -1   0   95.29   14.40
  -3  -1   0   67.09   10.80
  -3  -1   0   82.29   13.90
  -3  -1   0   70.79   13.20
  -3  -1   0   83.29   12.30
  -3  -1   0   94.69   15.10
  -3  -1   0   69.29   11.00
   3   1   0   74.29   12.30
   3   1   0   71.79   11.70
   3   1   0   79.39   12.90
   3   1   0   88.49   15.10
   3   1   0   88.99   13.40
   3   1   0   89.89   12.50
   3   1   0   81.09   11.90
   3   1   0   64.99   12.20
   3   1   0   90.59   15.60
  -4  -1   0 1497.75   86.39
  -4  -1   0 1324.47   84.99
  -4  -1   0 1520.15   85.09
  -4  -1   0 1571.84   84.89
  -4  -1   0 1510.75   81.89
  -4  -1   0 1466.35   83.89
  -4  -1   0 1543.95   82.49
  -4  -1   0 1394.26   86.09
  -4  -1   0 1494.35   83.59
  -4  -1   0 1553.84   90.89
   4   1   0 1453.05   81.69
   4   1   0 1604.74   85.09
   4   1   0 1513.45   84.29
   4   1   0 1551.84   83.59
   4   1   0 1480.55   85.89
   4   1   0 1420.76   83.09
   4   1   0 1416.26   82.39
   4   1   0 1588.74   82.69
  -5  -1   0  524.05   36.80
  -5  -1   0  476.95   37.90
  -5  -1   0  506.35   39.50
  -5  -1   0  543.45   42.60
  -5  -1   0  478.25   42.20
  -5  -1   0  494.15   35.40
  -5  -1   0  597.74   50.09
  -5  -1   0  514.55   38.20
  -5  -1   0  525.35   40.90
  -5  -1   0  484.15   38.40
   5   1   0  551.74   37.80
   5   1   0  493.55   36.60
   5   1   0  575.54   40.10
   5   1   0  456.65   37.50
   5   1   0  545.95   39.20
   5   1   0  498.45   42.60
   5   1   0  516.45   38.50
   5   1   0  441.46   40.20
   5   1   0  497.75   36.80
   5   1   0  472.15   37.50
  -6  -1   0  524.35   42.60
  -6  -1   0  537.05   43.20
  -6  -1   0  530.75   47.60
  -6  -1   0  539.05   47.60
  -6  -1   0  567.64   42.60
  -6  -1   0  541.55   55.19
  -6  -1   0  543.45   42.80
  -6  -1   0  547.55   45.10
  -6  -1   0  535.45   40.70
   6   1   0  578.44   44.40
   6   1   0  509.35   40.20
   6   1   0  584.84   49.30
   6   1   0  492.25   43.50
   6   1   0  544.65   41.40
   6   1   0  564.84   41.10
   6   1   0  567.24   42.70
   6   1   0  490.95   42.60
   6   1   0  507.85   43.60
   6   1   0  608.94   49.30
  -7  -1   0  272.07   37.10
  -7  -1   0  365.26   35.80
  -7  -1   0  368.26   37.50
  -7  -1   0  351.06   36.30
  -7  -1   0  415.36   53.09
  -7  -1   0  335.47   42.40
  -7  -1   0  424.76   43.60
  -7  -1   0  413.76   38.20
  -7  -1   0  320.87   35.50
   7   1   0  396.86   43.30
   7   1   0  375.86   38.00
   7   1   0  365.16   44.70
   7   1   0  370.86   36.70
   7   1   0  349.17   36.70
   7   1   0  427.86   35.50
   7   1   0  386.86   44.50
   7   1   0  363.86   35.00
   7   1   0  378.66   35.60
   7   1   0  449.16   39.10
  -8  -1   0   72.09   20.80
  -8  -1   0   72.59   21.70
  -8  -1   0   77.79   22.00
  -8  -1   0   96.59   25.10
  -8  -1   0   75.29   22.30
  -8  -1   0   72.39   26.80
  -8  -1   0   49.10   26.50
  -8  -1   0   88.89   33.00
  -8  -1   0   18.50   21.70
   8   1   0   59.09   22.00
   8   1   0   53.79   17.50
   8   1   0   77.99   28.90
   8   1   0   41.90   19.40
   8   1   0  108.09   25.60
   8   1   0   39.80   17.90
   8   1   0  109.99   29.60
   8   1   0   44.00   23.40
   8   1   0   97.39   21.70
   8   1   0   73.79   24.30
  -9  -1   0   -1.60   18.70
  -9  -1   0   12.70   19.50
  -9  -1   0   24.00   19.10
  -9  -1   0   17.00   32.10
  -9  -1   0   34.10   21.80
  -9  -1   0   29.40   21.30
   9   1   0    8.90   22.20
   9   1   0   96.19   33.00
   9   1   0   33.00   23.00
   9   1   0   16.60   16.40
   9   1   0   50.19   29.40
   9   1   0   31.00   19.20
   9   1   0   25.90   42.90
   9   1   0    5.60   22.40
   9   1   0   25.70   18.60
   9   1   0   20.60   19.30
 -10  -1   0  -10.20   27.80
 -10  -1   0   85.79   34.80
 -10  -1   0   54.19   25.00
 -10  -1   0   43.10   25.60
 -10  -1   0    4.20   23.00
 -10  -1   0    6.50   33.20
  10   1   0   -4.60   35.60
  10   1   0   23.00   21.00
  10   1   0   39.10   29.50
  10   1   0  105.89   29.20
  10   1   0   33.60   27.40
  10   1   0   37.10   22.50
  10   1   0   25.40   24.20
  10   1   0   32.80   31.20
  10   1   0   36.60   22.60
 -11  -1   0  101.99   45.80
 -11  -1   0   85.09   37.50
 -11  -1   0   48.30   27.30
  11   1   0   53.29   34.20
  11   1   0   81.99   36.00
  11   1   0   77.99   30.10
  11   1   0   62.99   29.60
  11   1   0   93.49   35.20
  11   1   0  167.98   42.20
  11   1   0  101.99   34.00
 -12  -1   0   72.19   41.60
 -12  -1   0   -0.20   26.00
 -12  -1   0   91.49   40.10
 -12  -1   0   76.69   33.80
  12   1   0   57.69   32.80
  12   1   0    6.60   30.80
  12   1   0   61.09   31.40
  12   1   0   64.29   36.00
  12   1   0   17.70   31.40
  12   1   0   52.89   40.70
 -13  -1   0  -18.00   36.90
 -13  -1   0  -20.90   26.20
 -13  -1   0  -26.30   31.00
  13   1   0   27.90   30.50
  13   1   0  -21.50   37.20
  13   1   0   42.60   43.00
  13   1   0   -1.10   29.10
  13   1   0   22.70   36.10
 -14  -1   0    2.10   33.70
 -14  -1   0  -24.60   51.59
 -14  -1   0  -68.79   55.79
  14   1   0   56.59   46.00
  14   1   0   33.00   32.70
  14   1   0   14.40   31.60
  14   1   0   32.00   34.40
  14  -2   0   -5.60   28.40
  14  -2   0  106.09   57.19
  14  -2   0  -39.20   32.40
  14  -2   0   46.50   40.90
 -14   2   0   13.20   47.80
 -14   2   0 -120.19   45.80
 -14   2   0  -26.30   34.10
 -14   2   0  -12.40   35.00
  13  -2   0  -12.40   29.20
  13  -2   0    3.20   41.50
  13  -2   0  -17.30   25.30
  13  -2   0   33.20   36.90
  13  -2   0   59.99   48.40
 -13   2   0   19.90   32.30
 -13   2   0   -4.60   47.20
 -13   2   0   -7.30   34.70
 -13   2   0   36.10   51.89
  12  -2   0   61.99   32.00
  12  -2   0  116.59   43.00
  12  -2   0  134.39   51.49
  12  -2   0   69.09   34.80
 -12   2   0   60.39   30.50
 -12   2   0  131.09   39.70
 -12   2   0  135.69   49.50
  11  -2   0   18.20   27.40
  11  -2   0   78.89   37.00
  11  -2   0   64.09   29.50
  11  -2   0   78.59   29.50
  11  -2   0   36.50   39.10
 -11   2   0   29.90   29.20
 -11   2   0  117.99   42.70
 -11   2   0   54.69   27.40
 -11   2   0   37.60   25.60
  10  -2   0  273.47   38.30
  10  -2   0  174.28   40.10
  10  -2   0  169.28   42.60
  10  -2   0  213.58   56.09
  10  -2   0  305.37   47.90
  10  -2   0  213.08   45.70
  10  -2   0  209.18   42.20
  10  -2   0  266.87   42.80
 -10   2   0  337.07   38.60
 -10   2   0  263.97   36.10
 -10   2   0  244.48   40.50
 -10   2   0  209.98   44.60
   9  -2   0  130.69   26.40
   9  -2   0   27.00   33.60
   9  -2   0   84.19   28.80
   9  -2   0   76.59   30.60
   9  -2   0   67.89   28.10
   9  -2   0   58.69   32.20
   9  -2   0  120.19   32.00
  -9   2   0   41.70   23.70
  -9   2   0   84.79   24.60
  -9   2   0   92.39   28.00
  -9   2   0   80.39   27.90
  -9   2   0  151.38   32.30
  -9   2   0   52.19   31.20
  -9   2   0  113.79   24.10
   8  -2   0   75.89   29.30
   8  -2   0   71.19   24.90
   8  -2   0   81.19   26.60
   8  -2   0  107.59   27.40
   8  -2   0   74.09   21.60
   8  -2   0   63.79   27.00
   8  -2   0  111.99   36.60
   8  -2   0   77.19   22.40
   8  -2   0  108.39   22.90
  -8   2   0  107.19   27.80
  -8   2   0   87.79   31.20
  -8   2   0   96.49   21.00
  -8   2   0  113.69   34.90
  -8   2   0   79.69   38.80
  -8   2   0   63.79   27.20
  -8   2   0   84.69   23.10
  -8   2   0   96.89   24.10
   7  -2   0  296.77   33.90
   7  -2   0  259.77   41.90
   7  -2   0  249.88   31.60
   7  -2   0  165.28   31.40
   7  -2   0  232.48   39.70
   7  -2   0  317.37   35.50
   7  -2   0  258.27   28.50
   7  -2   0  196.38   33.60
   7  -2   0  252.97   35.10
  -7   2   0  231.08   27.00
  -7   2   0  245.38   35.20
  -7   2   0  220.68   39.80
  -7   2   0  177.58   26.80
  -7   2   0  286.57   42.70
  -7   2   0  209.18   31.80
  -7   2   0  232.88   31.80
  -7   2   0  190.78   27.90
  -7   2   0  209.88   35.90
   6  -2   0  219.58   32.10
   6  -2   0  281.67   35.70
   6  -2   0  292.47   28.40
   6  -2   0  340.17   34.20
   6  -2   0  311.97   38.50
   6  -2   0  279.37   37.10
   6  -2   0  257.97   31.70
   6  -2   0  321.17   34.70
   6  -2   0  381.06   45.80
  -6   2   0  312.07   34.40
  -6   2   0  335.47   32.00
  -6   2   0  234.48   31.00
  -6   2   0  272.47   34.80
  -6   2   0  305.37   27.10
  -6   2   0  337.17   35.20
  -6   2   0  289.47   38.00
  -6   2   0  329.37   42.20
  -6   2   0  322.27   41.60
   5  -2   0  665.03   55.39
   5  -2   0  750.42   48.20
   5  -2   0  667.33   45.90
   5  -2   0  625.54   50.49
   5  -2   0  700.03   50.79
   5  -2   0  666.23   49.70
   5  -2   0  619.04   41.50
   5  -2   0  596.64   51.39
   5  -2   0  690.03   48.20
  -5   2   0  703.63   49.30
  -5   2   0  652.53   41.40
  -5   2   0  621.44   47.20
  -5   2   0  609.44   53.59
  -5   2   0  701.83   51.89
  -5   2   0  621.24   47.60
  -5   2   0  668.03   46.30
  -5   2   0  622.54   53.49
  -5   2   0  689.83   46.00
   4  -2   0  860.81   52.99
   4  -2   0  789.72   46.40
   4  -2   0  823.62   54.59
   4  -2   0  789.32   50.19
   4  -2   0  765.52   52.69
   4  -2   0  747.43   55.79
   4  -2   0  800.12   51.49
   4  -2   0  760.12   61.59
   4  -2   0  830.02   51.39
  -4   2   0  716.43   51.59
  -4   2   0  800.42   46.10
  -4   2   0  874.81   53.49
  -4   2   0  803.22   50.49
  -4   2   0  795.52   57.39
  -4   2   0  804.62   54.99
  -4   2   0  731.73   48.80
  -4   2   0  800.12   55.89
  -4   2   0  807.62   52.09
   3  -2   0  947.71   56.29
   3  -2   0  906.61   55.59
   3  -2   0  949.90   61.39
   3  -2   0 1041.30   59.59
   3  -2   0 1052.79   58.89
   3  -2   0  851.51   56.59
   3  -2   0  876.11   59.89
   3  -2   0  901.71   55.09
  -3   2   0  964.30   56.69
  -3   2   0  996.50   61.59
  -3   2   0  967.80   59.59
  -3   2   0  894.71   59.89
  -3   2   0 1071.99   58.49
  -3   2   0  863.51   55.59
  -3   2   0  919.61   56.79
  -3   2   0  972.40   55.39
   2  -2   0 4633.84  233.18
   2  -2   0 4531.05  230.38
   2  -2   0 4650.43  229.28
   2  -2   0 4722.73  231.08
   2  -2   0 4760.72  231.58
   2  -2   0 4207.08  232.28
   2  -2   0 4675.03  230.28
   2  -2   0 4377.86  229.58
  -2   2   0 4394.16  228.78
  -2   2   0 4108.09  229.58
  -2   2   0 4643.44  231.88
  -2   2   0 4570.54  233.08
  -2   2   0 4317.97  230.38
  -2   2   0 4534.55  230.28
  -2   2   0 4252.77  232.08
  -2   2   0 4572.24  230.08
   1  -2   0  414.06   23.60
   1  -2   0  436.56   31.40
   1  -2   0  427.86   31.00
   1  -2   0  462.75   28.30
   1  -2   0  463.95   29.60
   1  -2   0  416.26   26.30
   1  -2   0  432.26   26.70
   1  -2   0  432.26   28.20
  -1   2   0  446.16   27.40
  -1   2   0  426.56   26.40
  -1   2   0  474.55   28.70
  -1   2   0  390.46   26.50
  -1   2   0  425.16   30.40
  -1   2   0  454.55   29.80
  -1   2   0  416.26   30.80
   0  -2   0  345.17   19.80
   0  -2   0  322.77   21.30
   0  -2   0  323.07   22.70
   0  -2   0  352.86   20.90
   0  -2   0  320.77   23.40
   0  -2   0  330.17   19.10
   0  -2   0  357.76   19.90
   0   2   0  346.17   20.40
   0   2   0  302.57   23.60
   0   2   0  359.86   27.30
   0   2   0  326.37   23.60
   0   2   0  348.07   20.00
   0   2   0  333.57   20.20
   0   2   0  340.87   19.80
   0   2   0  363.96   21.30
  -1  -2   0   60.69    7.20
  -1  -2   0   92.69   15.30
  -1  -2   0   72.89    8.20
  -1  -2   0   73.19    9.20
  -1  -2   0   53.39    6.50
  -1  -2   0   63.49    9.70
   1   2   0   52.49   12.10
   1   2   0   64.39    8.10
   1   2   0   54.99    8.70
   1   2   0   78.89    8.40
   1   2   0   61.39    7.80
   1   2   0   94.79   13.60
   1   2   0   67.19    9.40
  -2  -2   0  162.38   19.40
  -2  -2   0  134.69   15.70
  -2  -2   0  141.79   20.20
  -2  -2   0  124.49   15.60
  -2  -2   0  151.78   11.30
  -2  -2   0  127.29   13.80
  -2  -2   0  133.39   13.60
  -2  -2   0  123.59   12.60
   2   2   0  119.19   13.00
   2   2   0  155.48   19.30
   2   2   0  119.19   13.30
   2   2   0  113.99   15.70
   2   2   0  119.89   14.80
   2   2   0  144.59   17.70
   2   2   0  143.09   11.10
   2   2   0  124.89   13.40
   2   2   0  128.59   14.00
   2   2   0  137.09   16.60
  -3  -2   0 2515.65  125.49
  -3  -2   0 2480.15  130.19
  -3  -2   0 2113.79  128.89
  -3  -2   0 2457.85  127.69
  -3  -2   0 2431.76  127.99
  -3  -2   0 2566.74  131.09
  -3  -2   0 2380.76  132.79
  -3  -2   0 2496.65  130.49
  -3  -2   0 2615.94  127.99
  -3  -2   0 2318.57  126.99
   3   2   0 2502.45  133.89
   3   2   0 2497.55  127.89
   3   2   0 2152.78  129.09
   3   2   0 2429.86  129.89
   3   2   0 2441.06  127.59
   3   2   0 2303.17  127.29
   3   2   0 2449.95  129.79
   3   2   0 2595.84  125.69
   3   2   0 2665.93  134.29
  -4  -2   0 1119.19   67.99
  -4  -2   0 1264.57   71.49
  -4  -2   0 1209.08   67.79
  -4  -2   0 1235.28   72.09
  -4  -2   0 1126.09   70.69
  -4  -2   0 1223.88   67.89
  -4  -2   0 1087.79   70.59
  -4  -2   0 1223.08   76.89
  -4  -2   0 1331.67   69.99
  -4  -2   0 1217.38   66.59
   4   2   0 1191.08   68.39
   4   2   0 1136.29   69.69
   4   2   0 1141.59   71.09
   4   2   0 1185.78   68.89
   4   2   0 1110.99   71.29
   4   2   0 1278.07   70.89
   4   2   0 1268.57   69.59
   4   2   0 1220.08   68.39
   4   2   0 1245.48   66.99
  -5  -2   0  317.67   39.70
  -5  -2   0  246.78   31.10
  -5  -2   0  249.28   25.80
  -5  -2   0  299.47   26.90
  -5  -2   0  327.37   32.80
  -5  -2   0  303.87   26.70
  -5  -2   0  248.38   30.60
  -5  -2   0  346.77   32.90
  -5  -2   0  302.37   38.60
   5   2   0  314.97   32.70
   5   2   0  229.98   29.40
   5   2   0  292.57   27.90
   5   2   0  340.37   28.40
   5   2   0  243.38   32.20
   5   2   0  329.87   29.10
   5   2   0  273.27   28.40
   5   2   0  363.16   31.20
   5   2   0  304.07   33.00
   5   2   0  317.57   29.40
  -6  -2   0  131.39   24.30
  -6  -2   0  181.48   34.00
  -6  -2   0  142.39   27.40
  -6  -2   0  113.19   20.50
  -6  -2   0  112.59   22.00
  -6  -2   0  172.78   21.10
  -6  -2   0  119.09   19.70
  -6  -2   0  127.39   25.50
  -6  -2   0  156.48   23.70
  -6  -2   0  148.59   24.70
   6   2   0  127.99   21.40
   6   2   0  140.99   21.40
   6   2   0  123.99   21.10
   6   2   0  134.59   22.10
   6   2   0   89.99   19.80
   6   2   0  173.88   29.10
   6   2   0  112.99   23.20
   6   2   0  113.29   20.90
   6   2   0   88.79   20.40
   6   2   0  112.69   27.50
  -7  -2   0   11.10   13.60
  -7  -2   0   17.60   13.70
  -7  -2   0  -39.90   19.60
  -7  -2   0    4.90   14.20
  -7  -2   0    9.90   16.70
  -7  -2   0   10.40   16.20
  -7  -2   0   10.90   19.00
  -7  -2   0   -5.10   13.60
  -7  -2   0    3.00   17.80
   7   2   0   28.80   16.50
   7   2   0   12.70   15.90
   7   2   0   15.30   15.40
   7   2   0   -2.20   14.00
   7   2   0   11.90   14.30
   7   2   0    4.20   15.40
   7   2   0  -14.70   17.80
   7   2   0    9.40   14.50
   7   2   0   15.10   20.00
  -8  -2   0  621.44   54.19
  -8  -2   0  637.14   51.89
  -8  -2   0  630.14   55.09
  -8  -2   0  614.24   57.49
  -8  -2   0  644.24   50.49
  -8  -2   0  861.11   97.29
  -8  -2   0  569.84   49.40
  -8  -2   0  762.72   61.69
   8   2   0  605.14   59.49
   8   2   0  768.42   52.89
   8   2   0  642.04   50.79
   8   2   0  596.84   52.99
   8   2   0  621.74   59.09
   8   2   0  647.44   56.79
   8   2   0  660.03   55.59
   8   2   0  617.24   51.59
  -9  -2   0  319.27   53.19
  -9  -2   0  253.97   32.70
  -9  -2   0  209.78   40.20
  -9  -2   0  293.37   42.60
  -9  -2   0  317.77   38.90
   9   2   0  287.87   38.10
   9   2   0  292.07   44.30
   9   2   0  217.98   32.70
   9   2   0  210.88   42.40
   9   2   0  243.08   37.00
   9   2   0  291.87   37.40
   9   2   0  274.87   34.20
   9   2   0  176.08   38.70
   9   2   0  294.57   38.00
   9   2   0  187.58   36.00
 -10  -2   0  223.28   42.10
 -10  -2   0  148.99   44.20
 -10  -2   0   77.59   30.50
 -10  -2   0   90.59   32.90
 -10  -2   0  159.98   31.90
  10   2   0  106.39   40.60
  10   2   0  130.09   37.20
  10   2   0  102.99   28.10
  10   2   0  199.48   35.10
  10   2   0  143.59   51.69
  10   2   0  119.49   30.20
  10   2   0  105.09   29.60
  10   2   0  126.39   33.90
  10   2   0  157.38   29.50
 -11  -2   0  118.19   32.60
 -11  -2   0  128.09   33.60
 -11  -2   0  145.89   49.90
  11   2   0  154.68   33.20
  11   2   0  135.49   35.90
  11   2   0  189.08   41.10
  11   2   0  108.99   46.10
  11   2   0  158.38   37.60
  11   2   0  105.29   66.69
  11   2   0  208.08   36.50
 -12  -2   0  -32.30   39.20
 -12  -2   0   -9.60   25.40
 -12  -2   0   -8.60   26.50
 -12  -2   0  -85.89   30.60
  12   2   0   -8.70   24.90
  12   2   0    4.60   26.80
  12   2   0  -11.50   25.80
  12   2   0   53.89   35.00
  12   2   0  -45.80   29.00
  12   2   0  -48.90   32.60
 -13  -2   0   38.00   42.20
 -13  -2   0   11.40   32.50
 -13  -2   0   59.59   50.39
 -13  -2   0   75.09   35.90
  13   2   0    3.00   29.00
  13   2   0  -12.80   29.90
  13   2   0  -20.00   31.20
  13   2   0   -9.40   39.60
  13   2   0   56.99   39.70
 -14  -2   0    9.10   55.29
 -14  -2   0   36.10   41.50
 -14  -2   0  -20.50   42.20
 -14  -2   0   67.79   40.80
  14   2   0   65.79   39.40
  14   2   0   60.29   46.50
  14   2   0    9.80   33.60
  14   2   0   18.20   37.80
  14  -3   0   48.30   58.99
 -14   3   0   53.99   52.69
 -14   3   0   45.40   51.59
 -14   3   0   53.49   37.10
 -14   3   0   42.70   40.60
  13  -3   0   25.90   32.40
  13  -3   0   40.80   34.60
  13  -3   0  -75.39   41.00
  13  -3   0  -29.70   33.10
 -13   3   0   12.10   30.00
 -13   3   0    5.60   45.60
 -13   3   0  -41.90   29.70
  12  -3   0  267.37   61.69
  12  -3   0  211.78   53.39
  12  -3   0  163.18   45.60
  12  -3   0  202.08   41.50
  12  -3   0  220.98   52.69
 -12   3   0  251.47   59.09
 -12   3   0  243.38   40.40
  11  -3   0   93.89   35.10
  11  -3   0  -29.40   24.80
  11  -3   0   54.49   30.90
  11  -3   0   23.00   27.50
  11  -3   0   49.40   41.70
  11  -3   0   -2.50   54.29
  11  -3   0   -4.70   22.50
 -11   3   0   -2.20   23.10
 -11   3   0   63.59   37.20
 -11   3   0   17.90   28.10
 -11   3   0   40.70   22.70
  10  -3   0  -14.80   23.40
  10  -3   0  -12.40   26.60
  10  -3   0   -3.60   26.80
  10  -3   0    3.80   21.00
  10  -3   0   28.40   26.70
  10  -3   0  -51.99   19.50
  10  -3   0  -35.20   31.60
 -10   3   0  -10.60   23.40
 -10   3   0    0.30   31.50
 -10   3   0   -4.10   19.10
 -10   3   0   -5.70   24.30
 -10   3   0  -29.50   22.50
   9  -3   0   -6.00   22.90
   9  -3   0  -30.50   29.00
   9  -3   0  -27.70   27.40
   9  -3   0   14.10   19.80
   9  -3   0   20.10   20.10
   9  -3   0   51.09   26.80
   9  -3   0   24.90   27.10
  -9   3   0   -6.20   16.30
  -9   3   0   26.30   20.60
  -9   3   0  -35.00   18.50
  -9   3   0    2.50   21.50
  -9   3   0   -6.00   28.00
  -9   3   0   16.00   22.50
   8  -3   0   20.30   26.10
   8  -3   0   43.10   24.80
   8  -3   0   46.20   24.40
   8  -3   0   27.40   18.20
   8  -3   0   80.19   21.80
   8  -3   0   42.80   27.20
   8  -3   0   23.10   31.50
   8  -3   0   20.30   19.40
  -8   3   0   39.20   30.80
  -8   3   0  -31.80   22.90
  -8   3   0   51.09   21.50
  -8   3   0   34.20   21.40
  -8   3   0   47.40   24.10
  -8   3   0   41.40   32.60
  -8   3   0    7.40   16.90
  -8   3   0   40.50   23.90
  -8   3   0   14.70   19.90
   7  -3   0   50.19   24.10
   7  -3   0   87.09   19.40
   7  -3   0   86.79   25.50
   7  -3   0   63.19   19.80
   7  -3   0   44.10   25.50
   7  -3   0   72.59   26.30
   7  -3   0   51.79   28.20
   7  -3   0   57.19   29.30
  -7   3   0   96.29   33.20
  -7   3   0   40.10   19.40
  -7   3   0   48.90   27.00
  -7   3   0   60.29   20.90
  -7   3   0   56.39   19.90
  -7   3   0   48.30   17.10
  -7   3   0   86.89   24.60
  -7   3   0   56.99   27.20
  -7   3   0   99.99   26.50
   6  -3   0  577.94   64.09
   6  -3   0  595.94   57.99
   6  -3   0  620.64   48.10
   6  -3   0  605.04   50.79
   6  -3   0  592.44   46.50
   6  -3   0  554.34   45.00
   6  -3   0  610.94   57.59
   6  -3   0  633.44   40.70
  -6   3   0  506.45   51.59
  -6   3   0  541.55   39.10
  -6   3   0  662.13   47.00
  -6   3   0  579.94   49.90
  -6   3   0  607.34   44.40
  -6   3   0  537.95   47.30
  -6   3   0  525.75   56.89
  -6   3   0  569.14   56.59
   5  -3   0   55.39   24.10
   5  -3   0   70.29   17.50
   5  -3   0   35.20   15.90
   5  -3   0   59.89   13.70
   5  -3   0   63.09   20.50
   5  -3   0   73.39   24.70
   5  -3   0   71.79   19.70
   5  -3   0   60.39   22.10
   5  -3   0   62.69   20.10
  -5   3   0  100.69   22.60
  -5   3   0   73.09   22.10
  -5   3   0   61.69   17.90
  -5   3   0   64.59   24.90
  -5   3   0   52.39   12.50
  -5   3   0   46.80   21.70
  -5   3   0   64.39   18.10
  -5   3   0   89.39   19.70
  -5   3   0   51.29   17.00
   4  -3   0 1078.29   62.09
   4  -3   0 1027.30   62.09
   4  -3   0  976.30   64.99
   4  -3   0 1048.40   69.49
   4  -3   0 1042.90   65.89
   4  -3   0  931.31   68.29
   4  -3   0  991.10   63.89
  -4   3   0 1039.00   60.89
  -4   3   0  970.10   62.09
  -4   3   0  908.51   61.19
  -4   3   0 1021.00   66.29
  -4   3   0  902.41   65.79
  -4   3   0  942.61   62.39
  -4   3   0  901.01   61.69
  -4   3   0 1046.30   69.19
   3  -3   0 1676.73   88.69
   3  -3   0 1454.05   89.69
   3  -3   0 1566.74   94.59
   3  -3   0 1562.74   89.29
   3  -3   0 1616.94   91.29
   3  -3   0 1612.24   91.59
  -3   3   0 1615.44   90.89
  -3   3   0 1582.64   94.29
  -3   3   0 1525.15   89.19
  -3   3   0 1654.23   93.39
  -3   3   0 1633.94   98.79
  -3   3   0 1561.14   87.69
  -3   3   0 1590.54   89.89
  -3   3   0 1637.04   93.89
   2  -3   0  593.14   46.20
   2  -3   0  638.74   39.30
   2  -3   0  638.44   39.40
   2  -3   0  621.74   42.60
   2  -3   0  610.74   41.60
   2  -3   0  612.14   41.10
   2  -3   0  618.94   45.80
  -2   3   0  647.14   45.80
  -2   3   0  658.03   42.60
  -2   3   0  643.64   42.50
  -2   3   0  638.24   43.80
  -2   3   0  633.84   40.10
  -2   3   0  599.84   40.10
  -2   3   0  544.25   43.10
  -2   3   0  576.64   38.40
   1  -3   0 1477.55   77.99
   1  -3   0 1351.56   82.19
   1  -3   0 1437.46   79.19
   1  -3   0 1501.45   82.89
   1  -3   0 1625.24   81.09
   1  -3   0 1428.66   77.69
   1  -3   0 1363.86   78.79
   1  -3   0 1344.47   74.69
  -1   3   0 1488.05   78.99
  -1   3   0 1444.36   77.79
  -1   3   0 1529.95   78.69
  -1   3   0 1416.46   81.39
  -1   3   0 1564.94   83.09
  -1   3   0 1506.65   81.69
  -1   3   0 1442.56   79.49
  -1   3   0 1403.96   74.89
   0  -3   0   50.29    8.30
   0  -3   0   76.59   13.40
   0  -3   0   61.19    9.10
   0  -3   0   62.79    9.80
   0  -3   0   51.99   15.40
   0  -3   0   53.49   10.20
   0  -3   0   59.79   13.40
   0  -3   0   40.00    7.00
   0   3   0   62.19    9.80
   0   3   0   60.69    7.90
   0   3   0   47.20   13.20
   0   3   0   46.10    9.00
   0   3   0   62.49   14.00
   0   3   0   50.59   13.70
   0   3   0   49.80    9.20
   0   3   0   62.49    9.00
   0   3   0   35.80   15.90
   0   3   0   60.89   11.00
  -1  -3   0  369.06   23.80
  -1  -3   0  372.76   23.70
  -1  -3   0  409.26   22.40
  -1  -3   0  391.76   36.10
  -1  -3   0  341.37   25.70
  -1  -3   0  355.36   28.00
   1   3   0  381.86   27.20
   1   3   0  371.06   26.00
   1   3   0  353.46   24.50
   1   3   0  372.26   24.00
   1   3   0  325.67   33.80
   1   3   0  329.37   30.90
   1   3   0  410.86   21.50
   1   3   0  399.86   23.60
   1   3   0  340.97   23.40
  -2  -3   0 4703.73  241.88
  -2  -3   0 4571.34  249.08
  -2  -3   0 4829.12  244.38
  -2  -3   0 4573.84  241.38
  -2  -3   0 4598.74  243.48
  -2  -3   0 4641.54  242.98
  -2  -3   0 4874.01  240.48
   2   3   0 5111.09  247.38
   2   3   0 5016.00  241.38
   2   3   0 4846.52  246.38
   2   3   0 4670.83  241.78
   2   3   0 4890.81  245.98
   2   3   0 4570.74  243.18
   2   3   0 4952.90  242.38
   2   3   0 4600.84  243.18
  -3  -3   0  619.64   35.70
  -3  -3   0  545.25   38.90
  -3  -3   0  533.05   37.00
  -3  -3   0  502.35   42.30
  -3  -3   0  590.44   31.70
  -3  -3   0  613.04   48.40
  -3  -3   0  472.35   37.00
   3   3   0  584.24   40.70
   3   3   0  538.25   36.30
   3   3   0  597.44   36.20
   3   3   0  626.14   44.60
   3   3   0  552.24   36.20
   3   3   0  619.64   42.30
   3   3   0  625.54   39.80
   3   3   0  545.65   32.80
   3   3   0  545.15   35.90
   3   3   0  606.44   39.00
  -4  -3   0 1462.15   75.29
  -4  -3   0 1212.18   76.49
  -4  -3   0 1429.16   80.59
  -4  -3   0 1415.06   87.39
  -4  -3   0 1271.67   81.29
  -4  -3   0 1207.18   76.99
  -4  -3   0 1201.48   76.89
  -4  -3   0 1382.26   71.39
  -4  -3   0 1331.57   74.19
  -4  -3   0 1340.07   75.09
   4   3   0 1327.37   71.29
   4   3   0 1138.49   74.39
   4   3   0 1342.77   78.69
   4   3   0 1312.77   75.19
   4   3   0 1411.66   84.89
   4   3   0 1326.97   78.99
   4   3   0 1292.27   78.19
   4   3   0 1383.26   75.29
   4   3   0 1369.06   78.49
   4   3   0 1422.66   75.59
  -5  -3   0 1036.90   59.29
  -5  -3   0 1181.08   65.19
  -5  -3   0  967.30   65.39
  -5  -3   0  938.71   65.09
  -5  -3   0 1133.79   78.49
  -5  -3   0  992.90   61.99
  -5  -3   0 1096.69   62.19
  -5  -3   0 1028.70   61.89
  -5  -3   0 1131.19   69.09
  -5  -3   0 1036.40   72.09
   5   3   0 1077.89   67.69
   5   3   0 1027.80   59.49
   5   3   0  988.70   65.39
   5   3   0 1057.49   73.19
   5   3   0 1152.18   68.59
   5   3   0  928.91   64.99
   5   3   0  910.21   62.19
   5   3   0 1000.20   62.59
   5   3   0  971.60   62.29
   5   3   0 1032.90   63.09
  -6  -3   0    3.40   17.10
  -6  -3   0  -17.60   14.50
  -6  -3   0  -18.00    9.80
  -6  -3   0   -8.70   10.50
  -6  -3   0   -6.80   10.90
  -6  -3   0    7.10   14.50
  -6  -3   0  -20.50   18.80
  -6  -3   0  -18.50   15.50
   6   3   0    7.50   17.90
   6   3   0  -18.20   11.50
   6   3   0    1.20   13.10
   6   3   0    5.70   14.90
   6   3   0   -6.10   13.00
   6   3   0   -2.90   12.90
   6   3   0  -12.00   14.50
  -7  -3   0  387.96   35.30
  -7  -3   0  334.27   42.30
  -7  -3   0  319.77   45.70
  -7  -3   0  308.17   31.50
  -7  -3   0  358.66   33.20
  -7  -3   0  280.37   32.20
  -7  -3   0  324.97   39.80
  -7  -3   0  337.77   37.10
  -7  -3   0  340.07   39.50
   7   3   0  344.47   35.20
   7   3   0  370.76   36.80
   7   3   0  343.77   41.10
   7   3   0  330.77   37.00
   7   3   0  293.27   35.10
   7   3   0  259.87   33.90
   7   3   0  327.47   34.50
   7   3   0  300.97   40.00
   7   3   0  351.66   33.70
  -8  -3   0  150.98   31.40
  -8  -3   0  157.98   30.70
  -8  -3   0  127.89   22.80
  -8  -3   0  125.49   26.60
  -8  -3   0  111.59   23.50
  -8  -3   0  127.79   29.90
  -8  -3   0  107.29   35.90
  -8  -3   0  103.39   22.60
   8   3   0  131.79   26.00
   8   3   0   90.69   24.20
   8   3   0   84.19   21.40
   8   3   0  107.19   25.10
   8   3   0  100.79   36.00
   8   3   0  151.08   30.20
   8   3   0   65.89   21.80
   8   3   0  127.99   29.80
   8   3   0   81.29   22.10
   8   3   0  137.19   31.90
  -9  -3   0   -2.00   22.80
  -9  -3   0  -12.70   15.90
  -9  -3   0  -36.50   20.80
  -9  -3   0   14.50   30.20
  -9  -3   0   30.20   24.40
  -9  -3   0   -2.30   16.70
   9   3   0   11.50   20.20
   9   3   0   14.70   25.20
   9   3   0    0.90   19.30
   9   3   0  -45.60   17.70
   9   3   0   -4.20   18.30
   9   3   0    2.20   23.50
   9   3   0   34.60   22.30
   9   3   0    7.10   20.30
   9   3   0   -4.10   18.30
   9   3   0   -5.80   20.10
 -10  -3   0  277.27   40.20
 -10  -3   0  162.88   38.40
  10   3   0  236.88   38.80
  10   3   0  217.58   41.30
  10   3   0  146.39   35.00
  10   3   0  313.77   50.99
  10   3   0  195.28   35.80
  10   3   0  280.27   42.50
  10   3   0  251.47   46.60
 -11  -3   0   22.10   30.70
 -11  -3   0   15.60   30.30
 -11  -3   0   71.99   28.50
 -11  -3   0   69.49   39.10
 -11  -3   0   17.40   28.80
 -11  -3   0   10.50   39.30
  11   3   0   34.20   44.60
  11   3   0   55.69   39.70
  11   3   0  -23.70   23.00
  11   3   0  -14.70   24.80
 -12  -3   0  108.79   41.70
 -12  -3   0   48.90   33.70
 -12  -3   0    8.70   43.50
 -12  -3   0   87.99   33.30
  12   3   0   28.90   34.40
  12   3   0  147.29   44.10
  12   3   0   52.09   33.80
  12   3   0   30.90   32.70
  12   3   0   62.99   48.00
  12   3   0   30.50   36.10
 -13  -3   0    7.10   33.80
 -13  -3   0  -22.90   41.90
 -13  -3   0  -12.50   31.70
 -13  -3   0   62.19   52.49
  13   3   0   81.19   38.40
  13   3   0   51.99   33.70
  13   3   0    5.40   34.30
  13   3   0   17.20   42.70
  13   3   0  -52.89   27.20
 -14  -3   0  -24.60   45.10
 -14  -3   0   30.30   37.70
 -14  -3   0    8.60   37.90
 -14  -3   0   54.49   51.29
  14   3   0   73.69   35.60
  14   3   0    1.40   62.99
  14   3   0   32.00   33.50
  14  -4   0   15.40   28.20
  14  -4   0  -82.29   36.10
 -14   4   0   46.40   44.10
 -14   4   0  -11.40   36.90
 -14   4   0   -6.00   45.40
  13  -4   0  232.18   51.99
  13  -4   0  150.08   58.09
  13  -4   0  214.58   50.69
  13  -4   0  257.57   45.40
 -13   4   0  233.88   59.39
 -13   4   0  252.37   53.89
 -13   4   0  236.88   44.80
  12  -4   0   84.39   32.30
  12  -4   0  142.09   54.59
  12  -4   0  109.89   50.99
  12  -4   0   80.29   45.60
  12  -4   0  148.59   38.90
 -12   4   0   84.79   40.10
 -12   4   0   67.09   48.00
 -12   4   0   62.39   32.90
 -12   4   0  121.39   37.80
  11  -4   0   80.89   39.50
  11  -4   0   46.80   31.40
  11  -4   0   55.99   46.10
  11  -4   0   42.70   32.80
  11  -4   0   70.99   28.00
 -11   4   0   46.90   27.40
 -11   4   0   59.49   43.90
 -11   4   0   52.79   33.10
 -11   4   0  125.19   37.40
 -11   4   0   13.90   24.00
  10  -4   0  -13.90   24.10
  10  -4   0    6.90   19.80
  10  -4   0  -16.20   24.70
  10  -4   0  -12.20   36.00
  10  -4   0    4.60   28.20
  10  -4   0   -2.60   34.50
  10  -4   0  -10.50   24.20
 -10   4   0  -35.80   20.80
 -10   4   0  -12.30   19.90
 -10   4   0   28.70   26.50
 -10   4   0   36.30   35.80
 -10   4   0   15.40   17.70
   9  -4   0  186.88   29.90
   9  -4   0  155.08   38.80
   9  -4   0  114.59   40.20
   9  -4   0  142.79   35.70
   9  -4   0  155.78   39.30
   9  -4   0  172.78   38.20
  -9   4   0  183.48   31.40
  -9   4   0   93.99   39.50
  -9   4   0  171.48   37.20
  -9   4   0  100.49   23.30
  -9   4   0  174.48   34.50
  -9   4   0  149.59   31.00
   8  -4   0  210.78   32.80
   8  -4   0  171.08   38.30
   8  -4   0  124.39   30.30
   8  -4   0  190.28   39.30
   8  -4   0  141.99   29.50
   8  -4   0  152.38   43.50
   8  -4   0  166.08   34.30
   8  -4   0  199.88   34.40
   8  -4   0  152.58   40.10
  -8   4   0  192.78   24.80
  -8   4   0  215.28   33.00
  -8   4   0  160.68   42.40
  -8   4   0  235.68   44.80
  -8   4   0  192.88   33.00
  -8   4   0  116.09   33.90
  -8   4   0  151.48   31.10
  -8   4   0  212.68   42.60
  -8   4   0  168.98   33.40
   7  -4   0  614.64   80.09
   7  -4   0  859.21   64.09
   7  -4   0  846.22   71.69
   7  -4   0  916.41   76.29
   7  -4   0  766.92   82.89
   7  -4   0  750.42   65.29
   7  -4   0  841.62   63.49
   7  -4   0  829.62   54.69
   7  -4   0  754.62   60.89
  -7   4   0  795.12   68.19
  -7   4   0  779.92   63.89
  -7   4   0  911.81   66.69
  -7   4   0  860.41   70.89
  -7   4   0  759.42   59.99
  -7   4   0  824.62   52.89
  -7   4   0  931.61   73.39
  -7   4   0  882.41   62.79
   6  -4   0  127.49   33.60
   6  -4   0  103.19   26.30
   6  -4   0  136.99   25.00
   6  -4   0  102.49   17.70
   6  -4   0   84.89   22.70
   6  -4   0  173.68   38.00
   6  -4   0  114.89   25.40
   6  -4   0   88.49   22.60
   6  -4   0   83.89   26.10
  -6   4   0  172.58   35.00
  -6   4   0   48.80   20.40
  -6   4   0   94.79   21.40
  -6   4   0   67.59   25.30
  -6   4   0   96.49   22.80
  -6   4   0  104.39   17.20
  -6   4   0   66.99   24.80
  -6   4   0   84.59   22.80
   5  -4   0 1736.63  103.39
   5  -4   0 1829.12  109.99
   5  -4   0 1783.42  100.89
   5  -4   0 1647.04  103.39
   5  -4   0 1630.54   99.59
   5  -4   0 1694.33  100.19
   5  -4   0 1594.24  101.69
   5  -4   0 1760.42  109.49
  -5   4   0 1699.73  101.39
  -5   4   0 1726.63  100.59
  -5   4   0 1772.42  108.79
  -5   4   0 1690.83  107.39
  -5   4   0 1584.94  100.49
  -5   4   0 1564.74  104.29
  -5   4   0 1888.91  104.09
  -5   4   0 1811.52  101.49
   4  -4   0 1057.19   67.39
   4  -4   0  980.70   62.89
   4  -4   0  942.31   65.29
   4  -4   0  961.10   71.29
   4  -4   0 1008.20   62.49
   4  -4   0  963.60   69.69
   4  -4   0  907.61   64.29
  -4   4   0  948.21   67.69
  -4   4   0  984.60   64.79
  -4   4   0 1066.19   71.99
  -4   4   0 1074.49   65.19
  -4   4   0  981.90   63.99
  -4   4   0 1037.90   65.29
  -4   4   0  976.80   61.69
  -4   4   0 1013.90   71.39
   3  -4   0  594.84   43.70
   3  -4   0  630.34   52.39
   3  -4   0  653.13   48.00
   3  -4   0  605.04   45.10
   3  -4   0  601.34   45.60
   3  -4   0  649.14   43.80
   3  -4   0  603.94   51.69
  -3   4   0  577.74   49.10
  -3   4   0  598.64   42.00
  -3   4   0  719.43   47.90
  -3   4   0  675.53   46.00
  -3   4   0  703.63   48.30
  -3   4   0  675.03   49.30
  -3   4   0  649.04   45.00
  -3   4   0  616.34   51.89
   2  -4   0  108.69   12.00
   2  -4   0  120.69   17.50
   2  -4   0  145.79   26.50
   2  -4   0  121.39   20.50
   2  -4   0  120.99   16.50
   2  -4   0  110.99   17.70
   2  -4   0  123.59   23.10
  -2   4   0  126.19   18.20
  -2   4   0  110.59   17.30
  -2   4   0  135.59   23.20
  -2   4   0  113.19   22.20
  -2   4   0  125.19   17.70
  -2   4   0  115.39   19.70
  -2   4   0   96.59   22.70
  -2   4   0  126.89   20.20
   1  -4   0   27.20    6.80
   1  -4   0   31.50   16.40
   1  -4   0   32.00    8.70
   1  -4   0   41.70   13.90
   1  -4   0   12.30   10.40
   1  -4   0   28.20    9.00
   1  -4   0   14.20   11.20
   1  -4   0   19.80   14.90
   1  -4   0   29.10   10.00
  -1   4   0   11.80    6.40
  -1   4   0   20.70   10.00
  -1   4   0   15.90   11.30
  -1   4   0   30.20   16.10
  -1   4   0   32.70   14.90
  -1   4   0   21.10   14.60
  -1   4   0   18.60   10.80
  -1   4   0   34.20   10.60
   0  -4   0  682.83   41.60
   0  -4   0  662.23   36.80
   0  -4   0  612.14   42.00
   0  -4   0  568.94   37.40
   0  -4   0  630.04   39.30
   0  -4   0  636.74   43.80
   0  -4   0  601.44   35.60
   0  -4   0  633.94   36.70
   0   4   0  608.74   44.00
   0   4   0  604.74   36.70
   0   4   0  578.04   49.20
   0   4   0  682.33   38.60
   0   4   0  643.64   39.90
   0   4   0  638.14   36.00
   0   4   0  653.23   44.00
   0   4   0  678.13   38.30
   0   4   0  620.14   38.00
   0   4   0  613.44   44.00
  -1  -4   0   15.90    7.70
  -1  -4   0    6.80    9.60
  -1  -4   0    6.40    6.80
  -1  -4   0    4.20   11.00
  -1  -4   0    8.00    5.90
  -1  -4   0    9.50   13.80
  -1  -4   0   -8.50   14.90
   1   4   0    3.30   11.30
   1   4   0    5.80   13.20
   1   4   0   10.10    8.60
   1   4   0    1.90   13.90
   1   4   0   15.20    7.30
   1   4   0   17.80    7.80
   1   4   0   13.80    7.20
   1   4   0   13.70    6.10
   1   4   0   20.10   11.10
   1   4   0    9.80    9.80
  -2  -4   0  -18.00   15.80
  -2  -4   0    7.10    6.10
  -2  -4   0    8.80    6.80
  -2  -4   0   -4.90   12.00
  -2  -4   0   -0.10    8.70
  -2  -4   0   -6.70    6.80
   2   4   0    9.30   14.70
   2   4   0    5.60    7.80
   2   4   0    7.10    8.00
   2   4   0   11.20   10.60
   2   4   0    3.40    7.90
   2   4   0    3.60   14.10
   2   4   0   -0.40   10.80
   2   4   0   11.30    9.90
   2   4   0    7.30    7.20
  -3  -4   0  932.31   54.39
  -3  -4   0  882.01   58.39
  -3  -4   0  910.31   57.09
  -3  -4   0  989.80   68.49
  -3  -4   0  853.11   52.79
  -3  -4   0  971.90   52.29
   3   4   0  963.10   53.79
   3   4   0  941.51   56.59
   3   4   0  944.01   54.19
   3   4   0  894.61   59.09
   3   4   0  921.01   62.19
   3   4   0  997.80   64.69
   3   4   0  969.70   55.29
   3   4   0  868.51   53.59
   3   4   0  909.51   56.69
  -4  -4   0  227.88   16.70
  -4  -4   0  198.28   22.70
  -4  -4   0  218.38   26.70
  -4  -4   0  311.17   33.40
  -4  -4   0  212.08   21.90
  -4  -4   0  192.18   20.20
  -4  -4   0  247.98   26.80
  -4  -4   0  251.37   38.30
   4   4   0  193.38   22.10
   4   4   0  206.68   25.50
   4   4   0  265.47   31.20
   4   4   0  209.88   26.80
   4   4   0  206.78   25.70
   4   4   0  226.08   24.90
   4   4   0  236.58   23.20
   4   4   0  206.98   21.60
  -5  -4   0  135.29   20.50
  -5  -4   0  142.39   24.20
  -5  -4   0  136.79   19.80
  -5  -4   0  117.19   30.20
  -5  -4   0  142.49   15.70
  -5  -4   0  148.99   23.70
  -5  -4   0  139.69   19.10
  -5  -4   0  149.39   27.90
   5   4   0  125.29   19.40
   5   4   0  165.98   25.40
   5   4   0  163.98   22.10
   5   4   0  130.09   23.60
   5   4   0  140.09   24.00
   5   4   0  160.78   21.80
   5   4   0  173.18   31.40
   5   4   0  128.99   20.90
   5   4   0  131.99   24.20
  -6  -4   0    4.30   12.50
  -6  -4   0   15.90   12.70
  -6  -4   0   21.20   23.00
  -6  -4   0   -1.50   18.50
  -6  -4   0   13.30   16.60
  -6  -4   0    6.50   12.70
  -6  -4   0   22.00   16.80
  -6  -4   0   36.20   15.90
  -6  -4   0   13.30   22.40
  -6  -4   0   28.70   11.70
   6   4   0   -4.40   13.00
   6   4   0   17.60   14.30
   6   4   0  -15.80   12.70
   6   4   0   36.90   21.60
   6   4   0    9.30   15.30
   6   4   0   36.50   22.00
   6   4   0    3.80   16.10
   6   4   0   10.60   11.50
   6   4   0  -18.90   11.50
   6   4   0   10.70   16.10
  -7  -4   0   15.80   13.30
  -7  -4   0   36.50   25.20
  -7  -4   0    0.10   14.80
  -7  -4   0   10.80   12.90
  -7  -4   0   15.00   13.80
  -7  -4   0   28.00   19.30
  -7  -4   0  -26.60   18.10
  -7  -4   0   65.69   29.60
  -7  -4   0    2.00   20.10
   7   4   0   11.10   26.60
   7   4   0   19.60   15.60
   7   4   0   17.80   15.50
   7   4   0   -2.70   13.90
   7   4   0    4.20   19.40
   7   4   0   -1.60   18.50
   7   4   0    9.90   17.60
  -8  -4   0  258.77   43.20
  -8  -4   0  102.79   39.80
  -8  -4   0  206.68   27.10
  -8  -4   0  130.39   27.70
  -8  -4   0  201.38   27.80
  -8  -4   0  186.18   33.90
  -8  -4   0  156.18   30.50
  -8  -4   0   73.79   33.60
  -8  -4   0   92.89   20.20
  -8  -4   0  143.99   26.30
   8   4   0  118.89   24.50
   8   4   0  116.39   25.80
   8   4   0  172.98   28.20
   8   4   0  121.59   25.60
   8   4   0  150.28   33.80
   8   4   0  161.18   27.30
   8   4   0  178.18   33.10
   8   4   0  121.49   28.30
   8   4   0  130.79   40.80
  -9  -4   0  635.94   58.79
  -9  -4   0  563.14   79.69
  -9  -4   0  555.14   57.49
  -9  -4   0  445.96   45.90
  -9  -4   0  606.94   77.69
  -9  -4   0  595.94   51.19
  -9  -4   0  477.35   55.79
   9   4   0  552.34   51.29
   9   4   0  493.15   51.19
   9   4   0  483.85   50.59
   9   4   0  502.35   51.69
   9   4   0  598.34   59.99
   9   4   0  521.95   49.80
   9   4   0  525.35   56.69
   9   4   0  518.75   57.09
 -10  -4   0   24.00   22.50
 -10  -4   0    7.50   39.90
 -10  -4   0   38.90   35.70
 -10  -4   0  -40.20   25.00
 -10  -4   0   37.60   22.10
 -10  -4   0   37.60   33.90
 -10  -4   0   -0.50   27.20
  10   4   0   24.60   30.30
  10   4   0   40.40   27.30
  10   4   0   26.80   25.50
  10   4   0   36.80   25.70
  10   4   0   16.20   25.20
  10   4   0    1.10   24.70
 -11  -4   0   45.40   37.40
 -11  -4   0   61.39   32.70
 -11  -4   0  110.19   31.80
 -11  -4   0   75.09   31.40
 -11  -4   0   63.39   34.70
 -11  -4   0   -5.00   41.00
 -11  -4   0  170.38   47.10
  11   4   0  -11.20   32.70
  11   4   0   55.99   29.50
  11   4   0    8.50   27.20
  11   4   0   23.60   28.60
  11   4   0   44.60   28.60
  11   4   0   60.09   38.80
  11   4   0   27.10   29.10
 -12  -4   0   69.69   44.30
 -12  -4   0   80.19   47.10
 -12  -4   0   68.89   33.90
 -12  -4   0  189.08   37.60
 -12  -4   0   89.29   48.70
  12   4   0  139.69   46.40
  12   4   0  165.08   46.20
  12   4   0  104.29   40.60
  12   4   0   90.79   36.30
  12   4   0  171.58   38.60
 -13  -4   0  131.59   39.10
 -13  -4   0  124.49   57.89
 -13  -4   0   28.20   43.30
 -13  -4   0  171.38   59.09
  13   4   0   35.70   33.70
  13   4   0   85.69   40.60
  13   4   0   83.99   44.60
  13   4   0   56.99   36.60
  13   4   0  235.98   48.80
 -14  -4   0   47.00   57.49
 -14  -4   0  -14.60   44.60
 -14  -4   0  111.69   41.20
 -14  -4   0  -15.60   42.10
  14   4   0   46.50   37.60
  14   4   0   37.50   37.70
  14  -5   0   27.80   41.30
  14  -5   0   68.79   47.00
  14  -5   0   73.09   35.60
 -14   5   0   49.40   49.99
 -14   5   0  173.58   48.10
  13  -5   0  187.48   39.90
  13  -5   0  187.28   56.89
  13  -5   0  295.57   56.39
  13  -5   0  153.28   55.09
 -13   5   0   74.59   40.50
 -13   5   0  152.48   48.50
 -13   5   0  115.49   40.80
  12  -5   0   36.60   30.40
  12  -5   0   18.40   44.40
  12  -5   0   -7.70   31.80
  12  -5   0  -13.10   36.40
  12  -5   0  -73.09   42.40
 -12   5   0   10.00   36.40
 -12   5   0  -26.10   30.70
 -12   5   0  -31.30   27.00
 -12   5   0  -53.09   29.40
  11  -5   0   52.79   31.70
  11  -5   0  -17.10   24.00
  11  -5   0   -1.70   31.30
  11  -5   0   27.10   36.20
  11  -5   0   22.10   41.70
 -11   5   0   -1.40   26.30
 -11   5   0    2.50   26.20
 -11   5   0   49.40   23.50
 -11   5   0   54.99   32.20
  10  -5   0    1.80   29.40
  10  -5   0   56.29   35.70
  10  -5   0  -25.50   20.50
  10  -5   0  -18.60   29.30
  10  -5   0   26.90   29.00
  10  -5   0   47.40   30.70
  10  -5   0   -9.80   29.60
 -10   5   0   20.90   31.10
 -10   5   0   23.30   30.00
 -10   5   0  -11.20   17.30
 -10   5   0   -2.70   22.80
 -10   5   0   22.50   24.00
   9  -5   0    9.20   31.10
   9  -5   0  -17.10   26.30
   9  -5   0   19.50   27.30
   9  -5   0   21.90   20.90
   9  -5   0   22.70   34.90
   9  -5   0   35.40   24.50
   9  -5   0   60.39   29.10
  -9   5   0   25.50   29.20
  -9   5   0   45.00   24.00
  -9   5   0   14.50   16.80
  -9   5   0   30.60   26.90
  -9   5   0  -17.00   28.70
  -9   5   0   29.40   25.90
   8  -5   0  432.96   50.09
   8  -5   0  311.47   54.19
   8  -5   0  283.47   46.00
   8  -5   0  335.27   55.49
   8  -5   0  385.26   53.89
   8  -5   0  324.77   46.60
   8  -5   0  369.06   46.20
  -8   5   0  317.47   43.30
  -8   5   0  431.46   50.49
  -8   5   0  313.07   52.49
  -8   5   0  438.86   57.09
  -8   5   0  306.17   39.70
  -8   5   0  368.66   44.10
  -8   5   0  285.17   32.70
   7  -5   0  477.05   46.80
   7  -5   0  431.56   37.40
   7  -5   0  528.85   47.90
   7  -5   0  406.06   53.69
   7  -5   0  461.25   51.39
   7  -5   0  340.67   47.20
   7  -5   0  383.66   43.50
   7  -5   0  447.16   50.69
   7  -5   0  514.35   60.69
  -7   5   0  420.16   52.59
  -7   5   0  467.25   44.70
  -7   5   0  403.26   35.20
  -7   5   0  401.46   45.50
  -7   5   0  457.15   62.49
  -7   5   0  453.95   48.70
  -7   5   0  561.14   48.00
  -7   5   0  631.24   83.69
   6  -5   0  395.16   45.80
   6  -5   0  291.27   40.90
   6  -5   0  379.26   41.40
   6  -5   0  433.56   53.09
   6  -5   0  393.66   39.30
   6  -5   0  337.47   43.10
  -6   5   0  388.36   41.30
  -6   5   0  317.07   46.20
  -6   5   0  370.56   50.89
  -6   5   0  246.58   37.10
  -6   5   0  361.36   40.90
  -6   5   0  278.37   43.50
  -6   5   0  403.06   42.10
  -6   5   0  318.67   37.70
   5  -5   0    8.00   19.90
   5  -5   0   34.00   16.60
   5  -5   0   53.39   22.10
   5  -5   0   27.10   17.80
   5  -5   0   32.90   25.50
   5  -5   0   50.89   23.80
   5  -5   0    0.90   18.30
  -5   5   0   25.40   21.10
  -5   5   0   48.50   19.50
  -5   5   0   15.80   17.70
  -5   5   0   33.50   16.60
  -5   5   0   35.40   21.10
  -5   5   0   45.60   21.10
   4  -5   0   17.70   14.30
   4  -5   0   46.70   18.90
   4  -5   0   23.60   15.60
   4  -5   0   28.10   17.50
   4  -5   0   29.90   21.70
   4  -5   0   11.20   19.20
   4  -5   0   51.99   20.00
  -4   5   0   36.70   16.30
  -4   5   0   56.29   21.50
  -4   5   0    7.90   15.80
  -4   5   0   42.60   18.80
  -4   5   0   43.20   22.40
  -4   5   0   33.80   16.60
  -4   5   0   39.10   17.00
  -4   5   0   33.40   20.60
   3  -5   0  395.66   33.60
   3  -5   0  408.06   44.30
   3  -5   0  380.86   32.90
   3  -5   0  452.05   44.50
   3  -5   0  380.06   25.90
   3  -5   0  454.35   37.80
   3  -5   0  385.86   38.80
   3  -5   0  368.86   38.30
  -3   5   0  430.36   44.00
  -3   5   0  404.96   33.80
  -3   5   0  393.36   40.70
  -3   5   0  373.36   35.20
  -3   5   0  457.95   36.50
  -3   5   0  374.96   38.40
  -3   5   0  381.86   38.90
  -3   5   0  445.06   45.60
   2  -5   0  114.09   13.50
   2  -5   0  115.89   25.20
   2  -5   0  137.09   19.90
   2  -5   0  137.69   21.20
   2  -5   0  142.19   28.20
   2  -5   0  159.08   22.80
   2  -5   0  142.19   22.80
   2  -5   0  109.59   25.50
  -2   5   0  138.09   22.60
  -2   5   0  162.38   26.50
  -2   5   0  118.19   25.30
  -2   5   0  162.98   20.40
  -2   5   0  114.69   19.20
  -2   5   0  114.99   23.70
  -2   5   0  129.49   19.60
   1  -5   0  434.56   39.40
   1  -5   0  405.46   26.00
   1  -5   0  462.45   30.30
   1  -5   0  357.86   28.00
   1  -5   0  454.75   35.90
   1  -5   0  390.46   32.40
   1  -5   0  420.26   33.90
   1  -5   0  396.36   38.10
   1  -5   0  401.86   31.00
  -1   5   0  468.15   40.20
  -1   5   0  361.46   38.40
  -1   5   0  405.06   38.50
  -1   5   0  424.56   26.70
  -1   5   0  433.36   34.00
  -1   5   0  392.56   32.00
  -1   5   0  420.86   31.60
  -1   5   0  481.45   33.40
   0  -5   0 1076.99   59.39
   0  -5   0 1040.90   59.69
   0  -5   0 1122.09   60.19
   0  -5   0 1050.09   67.39
   0  -5   0 1149.19   63.69
   0  -5   0 1205.68   71.39
   0  -5   0 1157.88   64.69
   0  -5   0 1053.89   61.49
   0   5   0 1091.89   59.79
   0   5   0 1064.59   67.59
   0   5   0 1118.59   62.29
   0   5   0 1142.29   64.19
   0   5   0 1025.50   67.89
   0   5   0 1142.39   61.89
   0   5   0 1072.09   74.69
   0   5   0 1145.89   62.39
   0   5   0  985.40   59.79
   0   5   0 1077.09   67.69
  -1  -5   0 1199.28   67.59
  -1  -5   0 1084.49   60.99
  -1  -5   0  964.20   68.69
  -1  -5   0  984.60   74.19
  -1  -5   0 1082.39   57.99
  -1  -5   0 1066.79   59.49
  -1  -5   0 1089.39   62.29
  -1  -5   0 1074.59   64.19
   1   5   0 1097.59   73.59
   1   5   0 1105.59   62.39
   1   5   0 1101.99   64.39
   1   5   0 1036.60   61.49
   1   5   0 1102.59   60.19
   1   5   0 1071.69   58.19
   1   5   0  972.40   67.39
   1   5   0 1061.79   65.99
   1   5   0 1096.49   60.59
   1   5   0 1115.09   60.59
  -2  -5   0  140.89   22.90
  -2  -5   0  178.58   22.00
  -2  -5   0  132.79   18.00
  -2  -5   0  103.09   26.10
  -2  -5   0  143.99   17.40
  -2  -5   0  133.39   15.70
  -2  -5   0  117.69   18.20
   2   5   0  116.39   25.20
   2   5   0  156.88   18.50
   2   5   0  136.49   18.80
   2   5   0  173.68   22.00
   2   5   0  153.78   35.80
   2   5   0  147.99   16.60
   2   5   0  167.68   18.10
   2   5   0  149.88   25.10
   2   5   0  127.49   17.20
  -3  -5   0  501.65   33.00
  -3  -5   0  527.65   52.09
  -3  -5   0  484.15   36.00
  -3  -5   0  486.05   38.00
  -3  -5   0  505.85   30.60
  -3  -5   0  407.06   31.90
  -3  -5   0  506.75   33.90
  -3  -5   0  415.26   36.90
   3   5   0  456.35   37.50
   3   5   0  503.15   36.70
   3   5   0  463.45   39.30
   3   5   0  559.74   44.60
   3   5   0  509.55   34.30
   3   5   0  514.85   35.20
   3   5   0  484.75   45.80
   3   5   0  483.65   33.10
   3   5   0  437.16   43.30
   3   5   0  505.65   33.90
  -4  -5   0  773.82   48.40
  -4  -5   0  734.33   50.29
  -4  -5   0  709.53   46.00
  -4  -5   0  748.53   45.20
  -4  -5   0  805.62   52.29
  -4  -5   0  849.22   67.09
  -4  -5   0  749.73   49.50
  -4  -5   0  683.23   51.79
   4   5   0  765.42   57.09
   4   5   0  753.32   50.89
   4   5   0  726.13   47.40
   4   5   0  732.93   47.50
   4   5   0  757.62   49.40
   4   5   0  708.63   56.99
   4   5   0  780.02   47.80
   4   5   0  760.12   54.39
   4   5   0  692.03   50.89
  -5  -5   0    2.30    9.40
  -5  -5   0    2.70   11.30
  -5  -5   0  -16.30   18.70
  -5  -5   0    8.00   14.70
  -5  -5   0   -8.20   10.60
  -5  -5   0  -20.10   15.90
  -5  -5   0   11.90   14.90
   5   5   0   -7.30   10.50
   5   5   0   13.10   15.40
   5   5   0    1.40   11.20
   5   5   0   28.30   15.60
   5   5   0   23.80   18.20
   5   5   0   -0.70   15.20
   5   5   0   10.60   13.70
   5   5   0  -11.30   15.00
  -6  -5   0   -3.50   23.00
  -6  -5   0   -8.30   15.60
  -6  -5   0   -2.30   19.80
  -6  -5   0   -0.30    7.90
  -6  -5   0    5.10   10.90
  -6  -5   0  -21.70   15.20
  -6  -5   0   -0.60   12.90
   6   5   0  -19.10   11.30
   6   5   0   39.80   20.50
   6   5   0  -15.20   11.00
   6   5   0  -10.90   11.90
   6   5   0    8.60   14.40
   6   5   0    7.20   15.90
   6   5   0   -2.90   17.50
   6   5   0   23.10   16.20
   6   5   0    7.60   15.90
  -7  -5   0   60.49   31.10
  -7  -5   0   74.09   18.50
  -7  -5   0  104.79   26.50
  -7  -5   0   90.99   19.10
  -7  -5   0   70.79   23.50
  -7  -5   0   65.29   19.10
  -7  -5   0   99.89   15.20
  -7  -5   0   80.39   19.10
  -7  -5   0   97.49   29.40
   7   5   0   60.69   22.10
   7   5   0   78.49   20.40
   7   5   0   89.09   23.40
   7   5   0   87.39   25.10
   7   5   0   61.59   20.00
   7   5   0   95.79   23.10
   7   5   0  105.29   27.70
  -8  -5   0  275.37   44.80
  -8  -5   0  221.08   35.70
  -8  -5   0  233.68   32.90
  -8  -5   0  187.98   49.20
  -8  -5   0  252.17   43.30
  -8  -5   0  190.78   28.70
   8   5   0  274.87   40.70
   8   5   0  208.08   31.40
   8   5   0  163.58   33.00
   8   5   0  276.87   35.90
   8   5   0  262.87   39.90
   8   5   0  248.48   35.50
   8   5   0  246.48   34.30
  -9  -5   0  194.88   37.50
  -9  -5   0   69.09   40.20
  -9  -5   0  104.79   31.60
  -9  -5   0   88.99   21.90
  -9  -5   0  161.28   45.40
   9   5   0   40.20   22.40
   9   5   0  137.89   28.50
   9   5   0   89.19   40.30
   9   5   0   94.99   27.80
   9   5   0  118.59   36.90
   9   5   0   45.00   25.40
   9   5   0   94.59   31.80
   9   5   0   96.99   37.30
 -10  -5   0   23.80   39.80
 -10  -5   0   43.90   30.30
 -10  -5   0   31.80   24.30
 -10  -5   0  -12.50   18.20
 -10  -5   0   22.80   29.60
 -10  -5   0   49.30   38.20
  10   5   0   39.40   31.80
  10   5   0   -5.80   23.30
  10   5   0   -8.40   22.60
  10   5   0   65.89   26.90
  10   5   0   -9.50   27.40
  10   5   0   12.90   24.20
  10   5   0   -0.20   21.30
 -11  -5   0   65.89   45.60
 -11  -5   0   54.99   24.10
 -11  -5   0   49.10   34.20
 -11  -5   0   26.50   26.30
  11   5   0   51.29   31.00
  11   5   0   80.29   32.60
  11   5   0  121.59   38.40
  11   5   0   69.69   36.00
  11   5   0   59.69   28.10
  11   5   0   23.00   28.80
 -12  -5   0   53.99   43.60
 -12  -5   0  105.39   50.49
 -12  -5   0   24.00   43.80
 -12  -5   0    7.50   29.10
  12   5   0   13.80   28.80
  12   5   0   32.80   35.20
  12   5   0   51.69   53.89
  12   5   0   32.90   27.90
  12   5   0   38.30   30.70
  12   5   0   41.00   33.70
 -13  -5   0  -44.40   34.90
 -13  -5   0  -21.20   46.90
 -13  -5   0   47.40   33.80
 -13  -5   0   27.60   34.80
 -13  -5   0  -20.90   44.40
  13   5   0   -1.80   27.50
  13   5   0   64.99   38.80
  13   5   0   -7.80   25.40
  13   5   0   59.79   42.60
 -14  -5   0  -57.79   55.09
 -14  -5   0   17.20   49.10
 -14  -5   0  -16.70   43.50
  14   5   0   60.39   46.10
  14   5   0  116.19   39.70
  14   5   0   13.30   33.00
  13  -6   0  -18.40   38.20
  13  -6   0  104.99   53.69
  13  -6   0   10.70   34.70
  13  -6   0  -35.50   36.50
 -13   6   0  -43.20   30.80
 -13   6   0 -107.69   38.60
 -13   6   0  -12.40   32.50
  12  -6   0   -8.20   27.50
  12  -6   0   47.50   46.50
  12  -6   0    9.80   36.60
  12  -6   0   -1.00   44.20
  12  -6   0   11.50   36.50
 -12   6   0  -12.00   33.20
 -12   6   0   -7.80   30.10
 -12   6   0   -5.60   25.30
 -12   6   0    2.80   28.80
 -12   6   0  -51.79   35.60
  11  -6   0   52.29   36.80
  11  -6   0   49.90   30.20
  11  -6   0   75.29   46.10
 -11   6   0  146.69   40.20
 -11   6   0   53.09   38.90
 -11   6   0   63.89   23.00
 -11   6   0   74.79   34.50
 -11   6   0   46.20   30.60
  10  -6   0   32.80   24.10
  10  -6   0   49.30   41.50
  10  -6   0   14.60   30.00
  10  -6   0   62.69   40.00
 -10   6   0   36.60   38.80
 -10   6   0   33.40   27.30
 -10   6   0   63.49   36.50
 -10   6   0   32.50   19.50
 -10   6   0   35.30   34.10
   9  -6   0  211.68   52.79
   9  -6   0  272.17   48.80
   9  -6   0  321.67   39.20
   9  -6   0  234.08   47.00
   9  -6   0  295.97   47.40
   9  -6   0  355.36   51.09
  -9   6   0  183.78   38.60
  -9   6   0  248.98   41.20
  -9   6   0  200.88   49.50
  -9   6   0  343.27   51.79
  -9   6   0  211.18   39.00
  -9   6   0  246.58   31.50
   8  -6   0  199.98   49.70
   8  -6   0  187.68   28.80
   8  -6   0  165.38   37.30
   8  -6   0  202.88   62.19
   8  -6   0  231.48   40.40
   8  -6   0  112.99   35.10
  -8   6   0  249.48   48.70
  -8   6   0  187.68   35.70
  -8   6   0  182.58   24.80
  -8   6   0  217.98   65.89
  -8   6   0  141.99   46.20
  -8   6   0  178.68   32.40
  -8   6   0  171.88   45.70
   7  -6   0  152.48   32.60
   7  -6   0  216.88   33.20
   7  -6   0  252.07   48.90
   7  -6   0  185.78   36.80
   7  -6   0   92.09   38.90
   7  -6   0  158.88   22.70
   7  -6   0  162.68   36.90
   7  -6   0  155.28   30.90
  -7   6   0  170.28   30.80
  -7   6   0  137.59   30.30
  -7   6   0  171.18   37.00
  -7   6   0  164.78   70.49
  -7   6   0  113.09   35.40
  -7   6   0  144.09   33.20
  -7   6   0  170.88   31.70
  -7   6   0  179.38   36.40
   6  -6   0  125.39   27.00
   6  -6   0   93.89   26.10
   6  -6   0  104.59   27.80
   6  -6   0  116.49   37.80
   6  -6   0  119.19   35.80
  -6   6   0  100.89   24.80
  -6   6   0  193.68   33.10
  -6   6   0  115.49   25.40
  -6   6   0  116.79   26.30
  -6   6   0  124.69   31.80
  -6   6   0  136.09   36.50
   5  -6   0   -6.10   16.40
   5  -6   0   -8.50   16.60
   5  -6   0   22.30   15.10
   5  -6   0   18.70   20.10
   5  -6   0    1.70   22.40
   5  -6   0   20.50   18.60
   5  -6   0   -7.80   24.20
  -5   6   0  -18.10   14.70
  -5   6   0   12.10   24.20
  -5   6   0   -0.30   15.30
  -5   6   0   -3.20   27.10
  -5   6   0   14.00   18.50
  -5   6   0   16.90   21.60
  -5   6   0   17.90   22.00
   4  -6   0  607.44   44.50
   4  -6   0  560.54   42.90
   4  -6   0  596.74   48.80
   4  -6   0  534.15   48.40
   4  -6   0  526.25   55.29
   4  -6   0  560.94   50.39
   4  -6   0  494.45   54.99
   4  -6   0  516.15   34.40
  -4   6   0  497.85   52.79
  -4   6   0  489.55   50.09
  -4   6   0  588.64   46.20
  -4   6   0  568.04   49.30
  -4   6   0  556.74   46.50
  -4   6   0  478.35   41.40
  -4   6   0  545.75   48.20
   3  -6   0  182.18   29.30
   3  -6   0  178.88   26.30
   3  -6   0  208.08   33.40
   3  -6   0  202.38   28.00
   3  -6   0  155.58   17.10
   3  -6   0  166.78   24.10
   3  -6   0  166.48   32.60
   3  -6   0  143.09   21.60
  -3   6   0  194.88   33.70
  -3   6   0  202.18   33.60
  -3   6   0  199.78   29.00
  -3   6   0  196.28   27.00
  -3   6   0  140.09   23.20
  -3   6   0  195.58   27.10
  -3   6   0  218.58   38.20
  -3   6   0  196.38   30.20
   2  -6   0 1527.65   81.09
   2  -6   0 1401.06   88.49
   2  -6   0 1513.05   95.49
   2  -6   0 1589.44   90.89
   2  -6   0 1603.84   91.59
   2  -6   0 1521.05   96.59
   2  -6   0 1519.25   86.69
   2  -6   0 1560.94   90.09
  -2   6   0 1591.74   89.39
  -2   6   0 1498.75   94.39
  -2   6   0 1564.44   88.19
  -2   6   0 1447.06   93.09
  -2   6   0 1552.84   96.29
  -2   6   0 1463.15   88.89
  -2   6   0 1589.74   91.79
   1  -6   0 1067.09   69.59
   1  -6   0 1139.69   66.39
   1  -6   0  966.50   58.89
   1  -6   0 1073.39   63.19
   1  -6   0 1074.39   70.79
   1  -6   0 1065.49   65.09
   1  -6   0 1073.29   61.39
   1  -6   0 1066.39   57.99
   1  -6   0 1119.19   64.79
  -1   6   0 1064.19   65.49
  -1   6   0  885.41   73.89
  -1   6   0 1047.70   70.49
  -1   6   0 1050.99   70.59
  -1   6   0 1076.59   64.19
  -1   6   0 1038.80   58.29
   0  -6   0  788.32   45.00
   0  -6   0  823.42   50.69
   0  -6   0  753.02   53.19
   0  -6   0  848.62   50.09
   0  -6   0  773.92   48.00
   0  -6   0  752.32   45.30
   0  -6   0  834.62   54.99
   0   6   0  789.72   48.30
   0   6   0  726.83   47.30
   0   6   0  678.43   45.40
   0   6   0  844.42   57.19
   0   6   0  761.32   48.90
   0   6   0  678.33   69.59
   0   6   0  759.42   63.29
   0   6   0  825.62   45.90
   0   6   0  768.62   50.59
   0   6   0  764.82   54.79
  -1  -6   0   74.09   28.00
  -1  -6   0  145.09   21.10
  -1  -6   0  123.59   13.60
  -1  -6   0  154.18   19.10
  -1  -6   0  117.29   16.80
  -1  -6   0  129.79   18.20
   1   6   0   89.39   23.60
   1   6   0  123.09   14.80
   1   6   0  111.89   28.40
   1   6   0  164.78   23.60
   1   6   0  147.09   19.70
   1   6   0  150.48   17.30
   1   6   0  106.39   16.00
   1   6   0  105.39   18.10
   1   6   0  130.09   17.60
   1   6   0  144.49   24.00
  -2  -6   0  102.39   17.00
  -2  -6   0   39.40   24.30
  -2  -6   0  106.89   15.30
  -2  -6   0  104.79   15.60
  -2  -6   0   64.39   12.40
  -2  -6   0   68.99   14.70
  -2  -6   0   64.79   10.10
  -2  -6   0  104.19   21.20
   2   6   0   74.79   16.40
   2   6   0   62.89   22.70
   2   6   0   73.49   14.50
   2   6   0   65.39   15.10
   2   6   0   66.19   14.40
   2   6   0   92.09   18.40
   2   6   0   67.19   23.10
   2   6   0   82.59   14.00
   2   6   0   75.39   20.00
  -3  -6   0   14.90   12.50
  -3  -6   0    3.80    7.40
  -3  -6   0    0.20    9.90
  -3  -6   0   27.40   23.40
  -3  -6   0   11.30   15.60
  -3  -6   0    0.30   12.20
  -3  -6   0   -6.20    9.30
  -3  -6   0   11.40    8.90
   3   6   0    6.90   10.80
   3   6   0   15.10   15.40
   3   6   0   10.70   11.50
   3   6   0    7.90   11.70
   3   6   0    1.00   14.30
   3   6   0    0.50   18.20
   3   6   0   22.00   10.70
   3   6   0   12.90   12.40
   3   6   0    3.10   15.80
  -4  -6   0 1160.98   67.99
  -4  -6   0 1206.58   73.59
  -4  -6   0 1303.57   90.19
  -4  -6   0 1151.58   64.49
  -4  -6   0 1061.59   66.99
  -4  -6   0 1162.88   69.39
  -4  -6   0 1105.39   70.09
  -4  -6   0 1126.49   71.29
   4   6   0 1229.08   69.29
   4   6   0 1011.00   78.49
   4   6   0 1175.88   80.09
   4   6   0 1180.28   68.79
   4   6   0 1163.98   83.39
   4   6   0 1152.08   76.89
   4   6   0 1152.98   70.39
   4   6   0 1165.48   71.89
   4   6   0 1240.28   73.89
  -5  -6   0  170.18   40.80
  -5  -6   0  143.29   25.70
  -5  -6   0  167.48   21.30
  -5  -6   0  166.08   21.60
  -5  -6   0  190.98   22.60
  -5  -6   0  177.78   26.30
  -5  -6   0  166.98   23.40
   5   6   0  158.98   30.40
   5   6   0  168.88   25.20
   5   6   0  197.28   25.20
   5   6   0  137.49   21.60
   5   6   0  129.39   20.90
   5   6   0  163.58   25.60
   5   6   0  163.18   31.90
   5   6   0  173.58   29.00
  -6  -6   0  216.78   31.10
  -6  -6   0  206.68   42.90
  -6  -6   0  205.08   30.10
  -6  -6   0  196.58   24.50
  -6  -6   0  200.68   30.00
  -6  -6   0  164.08   30.50
  -6  -6   0  231.78   27.20
   6   6   0  191.88   31.40
   6   6   0  224.48   31.30
   6   6   0  176.18   26.20
   6   6   0  231.98   31.40
   6   6   0  176.48   37.00
   6   6   0  264.17   29.40
   6   6   0  191.68   32.90
   6   6   0  245.78   32.30
  -7  -6   0   82.99   20.30
  -7  -6   0   67.99   35.60
  -7  -6   0   87.69   25.10
  -7  -6   0   99.79   20.90
  -7  -6   0   87.59   26.80
  -7  -6   0   33.00   21.90
   7   6   0   75.09   21.20
   7   6   0  101.79   28.30
   7   6   0   62.79   19.60
   7   6   0   93.49   25.60
   7   6   0   64.29   31.90
   7   6   0   91.59   21.10
   7   6   0   95.09   22.30
   7   6   0   94.99   25.30
  -8  -6   0   32.20   27.30
  -8  -6   0   27.90   37.00
  -8  -6   0   -6.60   22.30
  -8  -6   0   31.60   20.10
  -8  -6   0    3.40   11.20
   8   6   0   27.10   26.10
   8   6   0   26.30   24.20
   8   6   0   36.00   26.40
   8   6   0   23.90   21.50
   8   6   0   -2.30   18.10
   8   6   0   20.90   19.20
  -9  -6   0   51.49   22.70
  -9  -6   0   17.90   25.10
  -9  -6   0   -8.40   36.40
  -9  -6   0   24.50   26.70
  -9  -6   0   83.99   33.40
   9   6   0   47.20   22.90
   9   6   0   27.30   23.70
   9   6   0   17.10   22.60
   9   6   0   38.40   26.90
   9   6   0   -4.80   25.30
   9   6   0   14.90   25.50
   9   6   0   17.70   31.20
 -10  -6   0   54.09   30.40
 -10  -6   0   49.10   18.80
 -10  -6   0   54.09   48.80
 -10  -6   0   31.10   40.30
 -10  -6   0   -3.30   22.60
 -10  -6   0   28.00   28.80
  10   6   0   23.70   38.40
  10   6   0   58.79   38.10
  10   6   0  100.89   29.80
  10   6   0   29.40   33.50
  10   6   0   27.60   31.80
  10   6   0  -13.50   23.00
  10   6   0   73.39   28.80
 -11  -6   0   74.19   48.60
 -11  -6   0   83.79   44.20
 -11  -6   0   65.59   21.10
  11   6   0   59.49   28.60
  11   6   0   90.69   38.40
  11   6   0   38.30   33.80
  11   6   0   22.60   29.70
  11   6   0   67.19   31.40
  11   6   0   52.89   31.30
 -12  -6   0   68.59   50.89
 -12  -6   0   82.69   30.20
 -12  -6   0   -6.70   24.70
 -12  -6   0    4.80   46.60
 -12  -6   0  -26.50   31.50
  12   6   0   16.20   31.20
  12   6   0   -2.10   28.70
  12   6   0  -64.69   29.90
  12   6   0   -2.70   25.50
  12   6   0  -23.80   33.40
  12   6   0    1.20   83.49
 -13  -6   0  -42.80   40.30
 -13  -6   0  -30.60   42.30
 -13  -6   0   34.30   31.80
  13   6   0   14.30   32.70
  13   6   0  -18.00   25.00
  13   6   0    8.10   37.50
  13   6   0    9.60   29.10
 -14  -6   0  -67.09   47.20
 -14  -6   0   39.70   47.00
  14   6   0   -7.20   35.40
  14   6   0  -11.40   28.80
  14   6   0   18.50   40.30
  14   6   0    6.00   31.60
  13  -7   0   52.29   52.69
  13  -7   0   -4.40   43.70
 -13   7   0  -62.59   34.00
 -13   7   0  -47.30   38.40
 -13   7   0  -11.70   36.30
 -13   7   0  -24.60   39.20
  12  -7   0   23.50   49.20
  12  -7   0   47.80   31.20
  12  -7   0    0.60   39.40
  12  -7   0  -59.89   37.00
  12  -7   0   17.00   41.20
 -12   7   0   40.00   33.70
 -12   7   0   77.49   52.99
 -12   7   0   96.59   47.10
  11  -7   0   36.00   33.30
  11  -7   0  -18.50   39.10
  11  -7   0   93.89   47.90
  11  -7   0   48.10   29.80
  11  -7   0  -15.30   32.70
 -11   7   0    9.30   29.00
 -11   7   0    3.90   38.90
 -11   7   0    1.40   32.40
 -11   7   0   14.00   20.80
 -11   7   0    5.70   35.60
  10  -7   0  203.18   37.40
  10  -7   0  138.89   45.70
  10  -7   0  220.88   55.79
  10  -7   0  112.89   37.50
  10  -7   0   79.89   42.80
 -10   7   0  207.08   47.00
 -10   7   0   89.59   34.60
 -10   7   0  161.88   26.80
 -10   7   0  195.58   39.20
 -10   7   0  184.68   53.69
   9  -7   0  623.14   82.99
   9  -7   0  575.74   72.79
   9  -7   0  531.85   64.49
   9  -7   0  659.13   52.49
   9  -7   0  567.64   72.39
  -9   7   0  534.55   58.79
  -9   7   0  464.95   45.00
  -9   7   0  677.13   80.29
  -9   7   0  567.14   63.39
  -9   7   0  656.53   66.39
  -9   7   0  620.54   67.39
   8  -7   0  153.48   47.00
   8  -7   0   90.49   33.60
   8  -7   0  133.39   24.30
   8  -7   0  138.79   40.80
   8  -7   0  116.29   41.70
  -8   7   0   85.29   28.70
  -8   7   0  108.19   43.70
  -8   7   0   50.89   28.10
  -8   7   0  135.09   33.80
  -8   7   0  102.99   35.40
   7  -7   0   25.60   24.50
   7  -7   0   69.99   30.20
   7  -7   0   40.30   24.50
   7  -7   0   49.00   26.10
   7  -7   0   43.20   17.10
   7  -7   0   41.20   28.10
  -7   7   0   33.30   25.30
  -7   7   0  116.09   27.00
  -7   7   0   57.79   33.00
  -7   7   0   57.89   29.10
  -7   7   0   72.09   24.80
  -7   7   0   51.29   33.20
   6  -7   0  -10.10   19.20
   6  -7   0    5.30   26.20
   6  -7   0    9.00   29.20
   6  -7   0   18.80   17.00
   6  -7   0   -6.20   21.30
   6  -7   0    4.30   28.50
   6  -7   0   12.30   24.40
  -6   7   0   12.20   22.90
  -6   7   0    2.30   18.80
  -6   7   0   27.70   28.30
  -6   7   0   19.80   24.60
  -6   7   0   38.10   22.20
  -6   7   0   19.70   19.30
  -6   7   0   56.59   26.80
  -6   7   0    9.70   20.70
   5  -7   0  -25.90   24.50
   5  -7   0   21.80   15.00
   5  -7   0   18.50   19.40
   5  -7   0    7.20   20.90
   5  -7   0    6.80   26.10
   5  -7   0   31.60   21.30
   5  -7   0   44.60   20.70
  -5   7   0  -17.10   21.60
  -5   7   0   27.80   28.10
  -5   7   0   23.50   21.10
  -5   7   0   40.90   29.10
  -5   7   0    8.50   17.50
  -5   7   0   32.20   21.40
   4  -7   0  583.94   56.99
   4  -7   0  445.06   47.10
   4  -7   0  481.75   55.79
   4  -7   0  467.45   48.00
   4  -7   0  440.46   46.00
   4  -7   0  471.65   43.90
   4  -7   0  473.15   31.70
   4  -7   0  500.15   41.60
  -4   7   0  417.46   48.90
  -4   7   0  486.25   51.89
  -4   7   0  462.75   44.30
  -4   7   0  422.96   51.09
  -4   7   0  499.75   45.60
  -4   7   0  444.46   47.70
  -4   7   0  414.66   54.29
  -4   7   0  497.45   40.90
   3  -7   0 1174.28   78.69
   3  -7   0 1233.48   76.09
   3  -7   0 1314.97   80.29
   3  -7   0 1139.09   85.19
   3  -7   0 1235.78   78.99
   3  -7   0 1318.67   87.49
   3  -7   0 1193.58   65.89
   3  -7   0 1140.99   73.39
  -3   7   0 1224.08   77.09
  -3   7   0 1171.68   82.99
  -3   7   0 1134.09   74.39
  -3   7   0 1143.49   81.79
  -3   7   0 1238.78   86.59
  -3   7   0 1133.79   75.49
   2  -7   0  263.97   40.00
   2  -7   0  257.67   21.90
   2  -7   0  228.38   31.80
   2  -7   0  210.68   35.80
   2  -7   0  270.67   28.00
   2  -7   0  276.07   35.30
   2  -7   0  236.98   31.40
   2  -7   0  295.57   34.20
   2  -7   0  300.07   36.90
  -2   7   0  351.86   42.00
  -2   7   0  294.37   31.40
  -2   7   0  245.68   31.60
  -2   7   0  250.47   36.00
  -2   7   0  247.88   30.30
  -2   7   0  263.07   34.10
  -2   7   0  251.37   37.60
   1  -7   0    5.10   13.90
   1  -7   0    5.30   18.90
   1  -7   0   14.50   13.40
   1  -7   0   15.40   14.40
   1  -7   0   10.00   13.20
   1  -7   0   -3.90    7.50
  -1   7   0    3.40   12.90
  -1   7   0  -11.40   16.30
  -1   7   0   12.30   13.10
  -1   7   0    0.50   18.00
  -1   7   0   10.50   19.90
  -1   7   0  -13.20   16.40
  -1   7   0    1.30   12.50
  -1   7   0    3.80   14.50
  -1   7   0    4.80    8.50
   0  -7   0  621.14   45.30
   0  -7   0  658.73   40.70
   0  -7   0  678.03   45.50
   0  -7   0  681.03   53.79
   0  -7   0  688.63   51.29
   0  -7   0  691.83   40.60
   0   7   0  665.53   45.00
   0   7   0  668.23   61.69
   0   7   0  610.64   43.30
   0   7   0  605.24   50.89
   0   7   0  598.04   52.59
   0   7   0  690.23   47.60
   0   7   0  620.24   52.19
   0   7   0  587.54   43.80
   0   7   0  727.83   41.50
  -1  -7   0   33.70   13.30
  -1  -7   0   36.70   13.70
  -1  -7   0   31.00   16.10
  -1  -7   0    0.10   17.10
  -1  -7   0    3.10    9.30
  -1  -7   0    7.80    8.10
  -1  -7   0   29.10   24.80
  -1  -7   0   -4.10    9.70
   1   7   0   -0.40   19.80
   1   7   0   15.50   13.30
   1   7   0    7.60   12.90
   1   7   0   56.09   20.60
   1   7   0   31.90   11.20
   1   7   0    9.50   11.00
   1   7   0   36.70   20.40
   1   7   0   19.50   11.70
   1   7   0   14.10   10.60
   1   7   0   30.00   15.70
  -2  -7   0  146.69   15.70
  -2  -7   0  154.98   19.60
  -2  -7   0  165.88   20.10
  -2  -7   0  160.98   22.80
  -2  -7   0  132.39   36.20
  -2  -7   0  181.58   21.60
  -2  -7   0  164.58   21.10
  -2  -7   0  201.78   30.50
   2   7   0  189.98   24.90
   2   7   0  173.48   16.40
   2   7   0  205.68   28.70
   2   7   0  211.78   22.70
   2   7   0  160.28   20.60
   2   7   0  152.88   23.70
   2   7   0  113.59   27.40
   2   7   0   93.69   27.10
   2   7   0  218.38   26.00
   2   7   0  151.88   19.90
  -3  -7   0  234.28   25.90
  -3  -7   0  275.37   29.00
  -3  -7   0  291.77   47.30
  -3  -7   0  240.28   25.40
  -3  -7   0  271.67   27.20
  -3  -7   0  276.67   20.10
  -3  -7   0  351.16   37.20
  -3  -7   0  266.57   25.50
   3   7   0  271.87   29.70
   3   7   0  283.97   27.00
   3   7   0  291.67   35.40
   3   7   0  267.07   41.00
   3   7   0  264.47   34.50
   3   7   0  285.57   34.30
   3   7   0  262.97   33.20
   3   7   0  242.58   28.90
   3   7   0  247.98   36.50
   3   7   0  219.98   25.20
  -4  -7   0   61.29   16.10
  -4  -7   0  111.99   17.70
  -4  -7   0  157.88   36.10
  -4  -7   0  116.49   24.10
  -4  -7   0  158.28   21.20
  -4  -7   0   86.29   12.60
  -4  -7   0  118.79   20.20
  -4  -7   0  103.29   16.40
   4   7   0   98.59   20.10
   4   7   0   87.69   17.80
   4   7   0  125.99   19.70
   4   7   0  118.19   27.90
   4   7   0  168.78   29.10
   4   7   0  125.59   19.00
   4   7   0   87.19   27.10
  -5  -7   0   23.30   16.40
  -5  -7   0   15.50   12.60
  -5  -7   0    7.40   10.50
  -5  -7   0   89.99   38.90
  -5  -7   0   19.40   15.10
  -5  -7   0   53.29   14.10
  -5  -7   0   33.70   18.90
  -5  -7   0   28.50   14.40
   5   7   0   26.00   14.80
   5   7   0   43.00   22.90
   5   7   0   64.59   18.10
   5   7   0   51.39   17.70
   5   7   0   26.10   13.60
   5   7   0   46.00   20.50
   5   7   0   24.50   22.10
   5   7   0   50.79   15.90
  -6  -7   0   38.30   13.70
  -6  -7   0   12.90   20.20
  -6  -7   0   43.60   14.60
  -6  -7   0  -10.40   17.20
  -6  -7   0   43.20   13.70
  -6  -7   0   31.40   17.00
  -6  -7   0   19.00   17.80
  -6  -7   0   25.40   32.20
   6   7   0   26.70   15.90
   6   7   0   16.70   23.00
   6   7   0   43.20   19.10
   6   7   0    2.60   17.70
   6   7   0   39.80   17.10
   6   7   0   45.30   26.60
   6   7   0   39.50   16.60
   6   7   0   14.10   21.50
  -7  -7   0    7.50   12.90
  -7  -7   0   31.30   21.80
  -7  -7   0    0.50   21.00
  -7  -7   0   26.20   19.20
  -7  -7   0    8.30   20.60
  -7  -7   0   18.80   37.50
   7   7   0   -6.60   19.30
   7   7   0   12.00   16.70
   7   7   0    3.60   16.30
   7   7   0    9.40   18.50
   7   7   0   -4.30   20.10
   7   7   0   27.10   29.40
   7   7   0   13.30   17.30
  -8  -7   0   27.80   24.80
  -8  -7   0  -36.90   31.50
  -8  -7   0   29.50   25.50
   8   7   0   -0.40   19.00
   8   7   0  -22.20   25.60
   8   7   0    0.30   18.50
   8   7   0   21.50   24.40
   8   7   0  -13.60   29.00
   8   7   0    8.20   18.30
   8   7   0   62.89   34.00
   8   7   0  -10.20   23.70
  -9  -7   0   47.80   27.80
  -9  -7   0   30.30   28.80
  -9  -7   0   40.60   25.70
  -9  -7   0   19.90   43.10
   9   7   0   36.80   23.50
   9   7   0   25.00   25.30
   9   7   0   21.40   26.50
   9   7   0   50.09   23.60
   9   7   0   37.80   29.50
   9   7   0   -6.50   25.20
   9   7   0   68.99   30.00
 -10  -7   0   11.30   30.00
 -10  -7   0  -34.10   26.00
 -10  -7   0  -36.50   29.20
 -10  -7   0    1.90   15.90
 -10  -7   0  -24.80   38.80
  10   7   0  -35.50   21.60
  10   7   0   20.60   27.00
  10   7   0  -23.90   22.30
  10   7   0   41.20   23.30
  10   7   0  -30.00   31.10
 -11  -7   0   15.80   35.60
 -11  -7   0  -13.10   33.50
 -11  -7   0    5.20   33.10
 -11  -7   0  -17.30   40.70
 -11  -7   0  -12.20   45.00
  11   7   0   15.50   27.50
  11   7   0   14.80   31.30
  11   7   0  -23.50   28.70
  11   7   0  -26.50   22.50
  11   7   0   10.40   36.00
 -12  -7   0  -24.40   28.10
 -12  -7   0   11.70   39.00
 -12  -7   0  -87.29   37.90
 -12  -7   0   21.50   19.90
  12   7   0  -30.50   31.50
  12   7   0  -63.69   28.10
  12   7   0    0.80   30.80
  12   7   0   -3.10   23.60
  12   7   0  -61.69   44.20
  12   7   0  -21.10   28.20
 -13  -7   0  -36.50   44.20
  13   7   0    5.40   30.70
  13   7   0  -33.80   33.20
  13   7   0  -25.70   39.90
  13   7   0  -33.20   30.20
  13  -8   0  -21.30   45.10
  13  -8   0  -45.60   41.90
  13  -8   0    5.50   50.79
 -13   8   0   72.59   41.80
 -13   8   0  -17.50   33.50
 -13   8   0   95.89   40.60
  12  -8   0   -3.30   39.80
  12  -8   0   -1.00   34.80
  12  -8   0   33.00   29.10
 -12   8   0   65.79   46.90
 -12   8   0    0.50   32.50
 -12   8   0   17.80   30.80
 -12   8   0   18.40   34.20
  11  -8   0  245.98   48.00
  11  -8   0  188.98   55.99
  11  -8   0  242.68   65.29
  11  -8   0  100.89   53.49
  11  -8   0  226.08   46.60
 -11   8   0  144.99   41.10
 -11   8   0  167.88   29.00
 -11   8   0  246.88   62.99
  10  -8   0  162.98   40.30
  10  -8   0   86.29   47.30
  10  -8   0   80.69   43.80
 -10   8   0   93.89   23.50
 -10   8   0   74.09   49.80
 -10   8   0   88.89   40.70
 -10   8   0   77.49   34.90
 -10   8   0  111.59   37.70
   9  -8   0  232.88   34.60
   9  -8   0  255.37   50.59
   9  -8   0  160.68   47.20
   9  -8   0  243.58   43.30
   9  -8   0  207.38   56.69
  -9   8   0  205.58   42.40
  -9   8   0  255.87   45.60
  -9   8   0  237.08   29.20
  -9   8   0  315.17   44.70
  -9   8   0  331.27   53.19
   8  -8   0  -38.80   36.40
   8  -8   0  -27.50   47.10
   8  -8   0  -20.20   27.10
   8  -8   0   -9.00   27.40
   8  -8   0   13.70   17.00
  -8   8   0   -2.50   34.80
  -8   8   0   13.60   27.40
  -8   8   0   15.50   26.40
  -8   8   0  -33.10   20.00
  -8   8   0   -7.30   21.50
   7  -8   0  186.18   22.50
   7  -8   0  220.38   39.10
   7  -8   0   93.59   35.50
   7  -8   0   93.99   34.70
   7  -8   0  164.38   49.80
  -7   8   0  151.78   41.80
  -7   8   0  209.68   47.70
  -7   8   0  198.18   33.60
  -7   8   0  216.68   42.30
  -7   8   0  177.68   36.80
  -7   8   0  161.08   34.60
   6  -8   0   46.20   25.00
   6  -8   0   14.70   23.80
   6  -8   0   36.60   12.20
   6  -8   0   -0.10   18.90
   6  -8   0   14.70   23.10
   6  -8   0   54.49   27.30
   6  -8   0    2.60   32.40
  -6   8   0   23.70   29.10
  -6   8   0   38.20   33.60
  -6   8   0   25.30   20.60
  -6   8   0   37.50   22.30
  -6   8   0   -4.10   24.00
  -6   8   0   62.09   27.90
   5  -8   0  141.09   31.50
   5  -8   0  109.39   27.40
   5  -8   0  151.78   27.70
   5  -8   0  138.99   36.50
   5  -8   0  125.59   39.00
   5  -8   0  129.39   30.80
   5  -8   0  167.48   31.50
   5  -8   0  147.89   20.30
  -5   8   0  115.49   35.80
  -5   8   0  181.88   41.70
  -5   8   0  137.89   51.19
  -5   8   0  116.09   43.50
  -5   8   0  152.58   31.90
  -5   8   0  169.68   30.60
  -5   8   0  178.98   39.10
   4  -8   0 1055.29   85.99
   4  -8   0 1232.78   96.79
   4  -8   0 1208.38   82.79
   4  -8   0 1280.17   92.49
   4  -8   0 1203.28   75.49
   4  -8   0 1093.19   87.69
   4  -8   0 1189.48   77.69
   4  -8   0 1153.18   64.99
  -4   8   0 1178.48   85.39
  -4   8   0 1121.69   75.59
  -4   8   0 1178.18   82.29
  -4   8   0  956.40  107.59
  -4   8   0 1202.98   78.59
  -4   8   0 1037.10   83.99
  -4   8   0 1214.28   80.59
   3  -8   0  905.01   66.39
   3  -8   0  886.91   74.69
   3  -8   0  918.01   62.79
   3  -8   0  982.30   66.49
   3  -8   0  897.31   51.89
   3  -8   0  901.81   60.49
   3  -8   0  919.01   82.69
   3  -8   0  828.32   55.09
  -3   8   0 1022.70   67.99
  -3   8   0  873.51   64.69
  -3   8   0  724.23   69.09
  -3   8   0  845.22   60.69
  -3   8   0  854.71   70.69
  -3   8   0  904.71   63.59
  -3   8   0 1023.20   75.19
  -3   8   0  891.31   70.19
   2  -8   0  152.28   26.10
   2  -8   0  200.18   26.10
   2  -8   0  195.58   35.90
   2  -8   0  243.08   44.80
   2  -8   0  186.88   23.50
   2  -8   0  169.28   19.00
   2  -8   0  208.98   38.70
   2  -8   0  177.88   26.70
   2  -8   0  214.08   29.60
  -2   8   0  217.88   29.30
  -2   8   0  220.38   32.40
  -2   8   0  198.88   36.50
  -2   8   0  184.38   26.60
  -2   8   0  221.08   36.10
   1  -8   0   40.20   14.10
   1  -8   0   39.70   16.30
   1  -8   0   46.50   17.60
   1  -8   0   31.10   20.30
   1  -8   0   29.60   16.50
   1  -8   0   21.10   10.50
   1  -8   0   13.60   22.10
   1  -8   0   12.40   15.10
  -1   8   0    9.60   19.50
  -1   8   0    6.30   13.00
  -1   8   0   26.60   14.60
  -1   8   0   12.70   15.20
  -1   8   0   28.80   11.00
  -1   8   0   19.80   15.50
  -1   8   0    0.20   22.20
  -1   8   0   33.00   25.70
  -1   8   0   51.29   21.70
   0  -8   0   10.90    9.50
   0  -8   0   27.60   14.70
   0  -8   0   29.50   19.70
   0  -8   0   24.30   22.20
   0  -8   0   12.40   13.00
   0  -8   0   19.20   10.10
   0   8   0   22.40   11.20
   0   8   0    7.30   12.80
   0   8   0   33.50   25.60
   0   8   0    9.10   22.50
   0   8   0   43.00   22.70
   0   8   0    9.30   14.70
   0   8   0    8.20   13.50
   0   8   0   40.70   21.20
   0   8   0   40.60   15.90
  -1  -8   0  -21.60   14.00
  -1  -8   0   13.40   12.90
  -1  -8   0    0.80    7.70
  -1  -8   0  -11.00    8.90
  -1  -8   0   26.10   13.70
  -1  -8   0  -19.10   18.50
  -1  -8   0   -7.50   10.60
   1   8   0  -19.80   17.30
   1   8   0   -3.50   11.80
   1   8   0   13.40   16.80
   1   8   0   -1.10   13.50
   1   8   0    3.10   18.10
   1   8   0   -8.90   21.80
   1   8   0   32.00   13.40
   1   8   0    9.40   10.90
  -2  -8   0  201.08   44.70
  -2  -8   0  195.08   22.30
  -2  -8   0  145.39   15.30
  -2  -8   0  162.18   21.00
  -2  -8   0  152.08   24.00
  -2  -8   0  148.09   20.80
   2   8   0  133.69   25.20
   2   8   0  153.58   16.60
   2   8   0  134.99   23.00
   2   8   0  181.18   33.50
   2   8   0  161.18   32.90
   2   8   0  182.28   26.40
   2   8   0  164.08   22.30
   2   8   0  154.18   21.50
   2   8   0  219.08   25.40
  -3  -8   0  561.64   69.79
  -3  -8   0  597.34   53.19
  -3  -8   0  586.94   42.80
  -3  -8   0  640.74   43.90
  -3  -8   0  587.24   42.00
  -3  -8   0  583.74   47.10
   3   8   0  632.04   57.19
   3   8   0  581.44   46.60
   3   8   0  595.74   50.49
   3   8   0  580.94   58.99
   3   8   0  542.35   60.79
   3   8   0  624.54   48.20
   3   8   0  569.64   44.10
   3   8   0  601.04   52.59
   3   8   0  697.43   46.90
  -4  -8   0  612.54   49.70
  -4  -8   0  705.13   54.19
  -4  -8   0  659.93   44.90
  -4  -8   0  591.94   44.80
  -4  -8   0  739.13   77.39
  -4  -8   0  677.33   47.80
   4   8   0  674.93   50.09
   4   8   0  589.74   60.59
   4   8   0  672.53   54.09
   4   8   0  476.45   63.49
   4   8   0  668.23   54.59
   4   8   0  679.03   47.90
   4   8   0  669.63   60.49
   4   8   0  659.73   61.59
   4   8   0  737.33   50.49
   4   8   0  583.44   56.39
  -5  -8   0    2.80   11.70
  -5  -8   0   29.80   32.00
  -5  -8   0   20.20   12.40
  -5  -8   0  -13.90   12.50
  -5  -8   0   20.40   18.50
   5   8   0   18.50   17.00
   5   8   0   21.50   15.10
   5   8   0  -14.30   12.00
   5   8   0   -8.50   13.40
   5   8   0   -5.20   17.20
   5   8   0   37.30   40.20
   5   8   0  -15.00   22.70
   5   8   0   10.30   20.90
   5   8   0  -19.80   30.60
  -6  -8   0   46.60   23.20
  -6  -8   0   10.70   13.90
  -6  -8   0   13.70   17.70
  -6  -8   0   -0.20   19.00
   6   8   0   26.50   19.20
   6   8   0   39.80   21.30
   6   8   0    3.10   15.60
   6   8   0  -15.20   24.20
   6   8   0   49.40   26.40
   6   8   0  -19.20   17.60
   6   8   0    5.30   15.30
   6   8   0   14.50   21.20
   6   8   0  -52.29   23.90
  -7  -8   0  179.48   47.90
  -7  -8   0  127.29   22.20
  -7  -8   0  100.49   29.10
   7   8   0  149.49   28.80
   7   8   0  111.49   25.00
   7   8   0   79.69   23.10
   7   8   0   92.69   26.20
   7   8   0  103.39   28.90
   7   8   0  119.49   33.40
   7   8   0  107.39   25.40
  -8  -8   0  -20.30   38.20
  -8  -8   0   43.60   19.80
  -8  -8   0   41.90   26.40
   8   8   0   17.00   19.40
   8   8   0   39.50   24.50
   8   8   0  -40.60   26.30
   8   8   0   37.60   26.60
   8   8   0   86.79   31.70
   8   8   0   31.90   20.70
   8   8   0   21.70   21.70
  -9  -8   0   99.89   22.50
  -9  -8   0  -48.60   36.10
  -9  -8   0   88.59   33.40
   9   8   0   43.00   27.70
   9   8   0   32.90   31.60
   9   8   0   25.40   29.50
   9   8   0   58.09   28.30
   9   8   0   13.00   23.00
 -10  -8   0  -18.30   62.29
 -10  -8   0   42.50   22.40
 -10  -8   0   18.70   30.50
  10   8   0   -6.00   29.00
  10   8   0    3.10   22.00
  10   8   0   49.00   31.40
  10   8   0   69.19   28.20
  10   8   0   31.40   27.10
  10   8   0   17.70   26.00
 -11  -8   0   63.59   39.90
 -11  -8   0   74.49   58.39
 -11  -8   0   31.80   35.80
  11   8   0  107.99   35.80
  11   8   0   66.09   34.60
  11   8   0   72.79   35.70
  11   8   0   25.10   28.70
  11   8   0  100.29   32.20
  11   8   0   29.10   38.10
 -12  -8   0   87.79   57.09
 -12  -8   0 -104.99   35.90
  12   8   0  -21.80   30.70
  12   8   0    6.70   24.30
  12   8   0   -2.90   31.60
  12   8   0  -13.60   34.50
 -13  -8   0  -76.19   46.80
  13   8   0   37.60   35.20
  13   8   0  -13.70   53.99
  13   8   0  -38.70   23.90
  13   8   0   46.00   35.60
  12  -9   0   19.70   49.20
  12  -9   0   94.89   56.59
  12  -9   0   17.60   37.60
  12  -9   0   62.69   59.39
 -12   9   0   25.00   45.50
 -12   9   0   81.29   38.20
 -12   9   0   23.40   39.00
 -12   9   0   52.49   59.09
  11  -9   0  101.19   31.30
  11  -9   0   45.60   39.30
  11  -9   0  123.69   42.20
  11  -9   0   78.29   61.69
 -11   9   0  156.18   41.40
 -11   9   0   71.69   37.70
 -11   9   0  136.09   49.00
 -11   9   0  101.49   55.69
  10  -9   0  233.88   42.50
  10  -9   0  278.27   72.39
  10  -9   0  173.28   70.39
  10  -9   0  274.57   51.99
  10  -9   0  155.28   47.50
 -10   9   0  204.68   29.00
 -10   9   0  175.38   42.40
 -10   9   0  187.88   71.59
 -10   9   0  264.77   65.59
   9  -9   0  -13.00   31.80
   9  -9   0  -70.19   43.80
   9  -9   0   81.19   41.20
   9  -9   0  -30.60   28.10
   9  -9   0  -34.80   17.50
   9  -9   0    4.00   18.60
  -9   9   0   17.20   31.90
  -9   9   0  -66.59   37.00
  -9   9   0    4.10   27.20
  -9   9   0  -54.99   25.80
  -9   9   0   12.80   30.70
   8  -9   0   70.89   19.30
   8  -9   0   72.89   54.39
   8  -9   0   62.09   34.50
   8  -9   0   65.09   20.00
  -8   9   0   48.80   33.80
  -8   9   0   56.29   27.70
  -8   9   0   13.50   28.40
   7  -9   0   34.50   34.70
   7  -9   0   11.10   25.30
   7  -9   0  -49.10   32.70
   7  -9   0   19.00   26.20
   7  -9   0    8.30   14.00
  -7   9   0   19.70   33.80
  -7   9   0    1.10   24.30
  -7   9   0   36.30   37.40
  -7   9   0  -24.10   27.40
  -7   9   0   21.20   27.30
  -7   9   0   10.10   23.50
   6  -9   0   24.70   24.80
   6  -9   0   32.60   27.10
   6  -9   0    1.30   22.80
   6  -9   0    3.90   20.50
   6  -9   0   21.10   12.10
   6  -9   0    7.70   34.20
  -6   9   0   -0.40   25.60
  -6   9   0   49.20   29.90
  -6   9   0   14.80   23.30
  -6   9   0   50.29   25.70
  -6   9   0   29.20   32.10
   5  -9   0  627.14  106.89
   5  -9   0  534.65   56.29
   5  -9   0  479.45   51.29
   5  -9   0  472.65   36.20
   5  -9   0  449.26   53.99
  -5   9   0  489.05   56.49
  -5   9   0  495.55   64.19
  -5   9   0  495.65   65.89
  -5   9   0  498.15   55.09
  -5   9   0  491.65   53.99
  -5   9   0  550.34   60.89
  -5   9   0  463.85   52.09
   4  -9   0   18.50   27.80
   4  -9   0   27.60   31.00
   4  -9   0   27.80   23.70
   4  -9   0   44.30   23.30
   4  -9   0   70.39   27.30
   4  -9   0   66.49   20.80
  -4   9   0   34.10   28.10
  -4   9   0  103.59   36.20
  -4   9   0    3.40   21.30
  -4   9   0   57.19   31.10
  -4   9   0  102.59   29.90
  -4   9   0   28.80   26.40
  -4   9   0   59.99   23.60
  -4   9   0   29.70   24.40
   3  -9   0   42.40   30.60
   3  -9   0   31.10   25.70
   3  -9   0   33.40   19.00
   3  -9   0    9.10   21.00
   3  -9   0   12.40   14.10
   3  -9   0   40.70   22.90
   3  -9   0   12.30   18.50
   3  -9   0   39.90   16.10
  -3   9   0   34.50   28.10
  -3   9   0   17.00   17.90
  -3   9   0   30.20   27.50
  -3   9   0   33.10   19.60
  -3   9   0   52.09   24.70
  -3   9   0   38.20   20.00
  -3   9   0   26.10   21.80
  -3   9   0    1.50   24.10
   2  -9   0   46.10   20.90
   2  -9   0   85.29   23.30
   2  -9   0   61.09   16.60
   2  -9   0   68.19   18.10
   2  -9   0   75.69   29.10
   2  -9   0   56.19   30.30
   2  -9   0   70.09   22.10
  -2   9   0   58.39   38.70
  -2   9   0   55.59   19.70
  -2   9   0   42.60   24.60
  -2   9   0   78.99   21.90
  -2   9   0   18.40   24.10
   1  -9   0  145.19   25.50
   1  -9   0  159.98   19.80
   1  -9   0  150.98   18.00
   1  -9   0  162.68   24.30
   1  -9   0  120.49   32.90
   1  -9   0  191.18   35.80
   1  -9   0  141.79   24.20
  -1   9   0  130.39   35.00
  -1   9   0  159.78   33.60
  -1   9   0  163.38   24.20
  -1   9   0  141.59   31.20
  -1   9   0  178.18   21.30
  -1   9   0  130.99   23.20
  -1   9   0  127.89   23.80
  -1   9   0  123.99   25.80
  -1   9   0  110.39   30.90
   0  -9   0  296.97   26.00
   0  -9   0  306.27   39.20
   0  -9   0  288.37   31.30
   0  -9   0  296.67   26.80
   0  -9   0  280.37   42.30
   0  -9   0  249.48   37.60
   0   9   0  297.67   32.10
   0   9   0  345.27   32.90
   0   9   0  302.77   43.40
   0   9   0  274.17   27.00
   0   9   0  306.17   39.90
   0   9   0  307.87   50.79
   0   9   0  295.17   33.60
   0   9   0  219.98   38.40
   0   9   0  268.77   35.40
  -1  -9   0   23.40   11.50
  -1  -9   0   26.20   14.10
  -1  -9   0   18.50   15.10
  -1  -9   0   -6.40    7.80
  -1  -9   0   15.90   13.00
  -1  -9   0   48.30   19.60
  -1  -9   0   16.50   22.00
   1   9   0   10.50   13.70
   1   9   0   20.30   24.40
   1   9   0  -20.50   11.30
   1   9   0    3.10   16.10
   1   9   0    5.40   13.00
   1   9   0   -3.40   13.90
   1   9   0    2.50   11.70
   1   9   0  -28.20   19.50
   1   9   0   -6.00   16.40
   1   9   0  -28.40   20.30
  -2  -9   0   99.69   18.70
  -2  -9   0  107.89   23.60
  -2  -9   0  157.48   43.50
  -2  -9   0  110.49   19.30
   2   9   0   88.49   14.80
   2   9   0  113.79   23.30
   2   9   0  104.79   28.80
   2   9   0   76.49   33.20
   2   9   0   99.99   19.70
   2   9   0  103.89   21.50
   2   9   0   78.89   27.40
   2   9   0   82.39   18.90
   2   9   0  122.29   24.50
  -3  -9   0  165.48   23.60
  -3  -9   0  207.18   25.80
  -3  -9   0  161.48   23.90
  -3  -9   0  143.99   32.60
  -3  -9   0  160.88   46.20
  -3  -9   0  198.78   28.90
   3   9   0  154.78   29.40
   3   9   0  198.98   38.40
   3   9   0  250.97   31.00
   3   9   0  195.28   31.70
   3   9   0  189.18   26.40
   3   9   0  142.09   28.10
   3   9   0  176.68   40.50
   3   9   0  205.08   33.80
   3   9   0  237.28   29.50
  -4  -9   0   93.19   30.40
  -4  -9   0   66.99   17.00
  -4  -9   0   42.20   22.70
  -4  -9   0   93.99   41.60
  -4  -9   0   74.19   17.20
   4   9   0   85.89   20.40
   4   9   0   96.09   21.60
   4   9   0   79.19   21.10
   4   9   0   17.30   28.70
   4   9   0   75.79   27.60
   4   9   0   51.79   24.70
   4   9   0   88.79   21.00
   4   9   0   61.89   25.60
  -5  -9   0   28.90   22.10
  -5  -9   0   81.49   61.19
  -5  -9   0    4.10   17.90
  -5  -9   0    3.60   15.80
  -5  -9   0   17.20   14.60
   5   9   0   27.10   17.40
   5   9   0   31.70   21.90
   5   9   0   13.00   23.00
   5   9   0   -4.50   15.80
   5   9   0   30.40   24.60
   5   9   0   37.30   25.40
   5   9   0   13.90   15.90
  -6  -9   0   54.99   18.60
  -6  -9   0   46.10   25.90
  -6  -9   0   51.19   25.70
  -6  -9   0   73.29   43.10
   6   9   0    4.40   28.60
   6   9   0   42.00   21.00
   6   9   0   38.70   30.30
   6   9   0   42.90   24.10
   6   9   0   46.60   20.20
   6   9   0   54.39   22.10
   6   9   0   96.69   32.90
   6   9   0   46.60   19.60
  -7  -9   0  -46.40   34.90
  -7  -9   0  -34.90   23.50
  -7  -9   0   18.40   17.40
   7   9   0   24.70   25.40
   7   9   0   11.40   23.10
   7   9   0   13.00   17.90
   7   9   0    4.70   20.30
   7   9   0  -23.70   28.10
   7   9   0   20.90   22.50
  -8  -9   0  -45.10   24.80
  -8  -9   0   12.10   18.20
  -8  -9   0   23.50   42.70
   8   9   0   22.30   29.50
   8   9   0   -6.20   25.20
   8   9   0   10.20   25.00
   8   9   0    0.70   21.00
   8   9   0    9.90   21.90
   8   9   0   34.70   21.20
  -9  -9   0   33.30   30.00
  -9  -9   0    0.10   46.50
  -9  -9   0    7.50   19.60
   9   9   0   30.00   29.40
   9   9   0  -20.50   21.50
   9   9   0    4.10   20.70
   9   9   0   31.10   25.90
   9   9   0    1.20   22.80
 -10  -9   0  -56.99   29.00
 -10  -9   0   54.99   49.30
 -10  -9   0   -9.60   23.20
  10   9   0   95.89   35.20
  10   9   0    8.10   22.90
  10   9   0   37.90   26.40
  10   9   0   65.89   33.70
  10   9   0  -24.40   25.50
  10   9   0   -7.50   27.40
 -11  -9   0   44.10   38.80
 -11  -9   0   24.20   52.19
 -11  -9   0    8.80   26.60
  11   9   0  -22.40   28.60
  11   9   0  -31.50   21.00
  11   9   0   55.29   34.70
  11   9   0   79.59   38.30
  11   9   0  -11.10   27.60
  11   9   0   18.10   27.30
 -12  -9   0  -35.50   48.20
 -12  -9   0   -6.90   66.79
  12   9   0   -3.20   30.70
  12   9   0   -1.60   23.40
  12   9   0   50.89   36.70
  12   9   0  -27.10   27.80
  12 -10   0   51.59   60.99
  12 -10   0   62.19   38.50
 -12  10   0   -3.50   53.09
 -12  10   0   24.50   37.00
 -12  10   0   50.09   39.60
 -12  10   0   41.70   41.40
  11 -10   0  -17.90   53.69
  11 -10   0   54.29   41.30
  11 -10   0   21.40   42.60
  11 -10   0   59.89   29.70
 -11  10   0  -24.20   48.10
 -11  10   0   -2.20   32.30
 -11  10   0  -18.80   34.50
 -11  10   0   91.89   44.50
  10 -10   0  -14.80   23.20
  10 -10   0   17.50   52.69
  10 -10   0  -12.70   33.60
  10 -10   0  -33.30   36.20
 -10  10   0   -6.70   26.70
 -10  10   0  -26.00   17.80
 -10  10   0  -15.10   35.20
 -10  10   0   25.80   32.20
 -10  10   0  -55.99   38.60
   9 -10   0    2.10   18.80
   9 -10   0   17.00   44.00
   9 -10   0   -4.00   30.50
   9 -10   0  -42.60   32.80
   9 -10   0   22.90   44.60
  -9  10   0   42.80   35.70
  -9  10   0   33.20   43.30
  -9  10   0    0.60   27.40
  -9  10   0   71.69   30.20
  -9  10   0   33.10   34.90
   8 -10   0   50.89   43.30
   8 -10   0  -14.70   15.80
   8 -10   0   30.50   19.80
   8 -10   0    6.30   32.30
   8 -10   0   -0.70   33.20
   8 -10   0   57.99   37.10
  -8  10   0   79.89   43.60
  -8  10   0  -43.80   25.70
  -8  10   0   34.80   31.10
  -8  10   0  -32.40   24.20
  -8  10   0   14.30   32.00
   7 -10   0   75.79   35.80
   7 -10   0  127.89   19.30
   7 -10   0   76.89   39.40
   7 -10   0  129.39   51.09
   7 -10   0   54.09   31.20
  -7  10   0   55.39   31.00
  -7  10   0  150.88   72.59
  -7  10   0  137.69   34.60
  -7  10   0  129.99   38.00
  -7  10   0  144.09   40.30
   6 -10   0  849.41  130.99
   6 -10   0  859.31   76.39
   6 -10   0  835.62   49.99
   6 -10   0  825.12   85.69
   6 -10   0  831.72   69.29
  -6  10   0  761.82   76.49
  -6  10   0  776.32   83.49
  -6  10   0  664.03   70.09
  -6  10   0  717.73   72.59
  -6  10   0  701.83   63.79
  -6  10   0  820.92   83.29
   5 -10   0  100.89   36.30
   5 -10   0   54.39   22.80
   5 -10   0   85.79   41.00
   5 -10   0   94.09   16.30
   5 -10   0   74.39   30.70
   5 -10   0   91.69   29.80
  -5  10   0  112.39   32.10
  -5  10   0   53.99   30.50
  -5  10   0  127.19   35.30
  -5  10   0   42.00   38.80
  -5  10   0   22.60   36.10
  -5  10   0   53.69   35.60
   4 -10   0  304.57   50.29
   4 -10   0  293.87   30.20
   4 -10   0  219.18   27.20
   4 -10   0  233.18   34.60
   4 -10   0  272.77   41.30
   4 -10   0  214.08   38.20
   4 -10   0  190.38   28.70
  -4  10   0  210.38   43.00
  -4  10   0  248.68   35.70
  -4  10   0  242.68   46.10
  -4  10   0  304.37   47.80
  -4  10   0  216.98   39.70
  -4  10   0  234.08   34.20
  -4  10   0  157.78   32.00
   3 -10   0   34.00   22.50
   3 -10   0   19.10   15.90
   3 -10   0   16.50   13.90
   3 -10   0    4.20   10.70
   3 -10   0   22.40   23.70
   3 -10   0   68.39   34.10
  -3  10   0   -0.60   19.10
  -3  10   0   68.89   31.40
  -3  10   0   64.89   26.40
  -3  10   0   49.60   28.10
  -3  10   0   11.20   21.40
   2 -10   0   46.40   22.60
   2 -10   0   36.10   26.20
   2 -10   0   42.80   26.20
   2 -10   0   56.29   13.00
   2 -10   0   37.80   28.00
   2 -10   0   20.80   14.90
   2 -10   0   98.99   34.30
  -2  10   0   63.49   30.50
  -2  10   0   15.70   21.80
  -2  10   0   59.29   21.40
  -2  10   0   42.60   19.10
  -2  10   0  123.89   33.20
   1 -10   0   39.50   19.00
   1 -10   0   57.79   31.60
   1 -10   0   49.10   14.50
   1 -10   0   38.80   26.80
   1 -10   0   46.90   19.30
   1 -10   0   19.40   11.70
   1 -10   0   71.19   27.10
  -1  10   0   56.09   28.60
  -1  10   0   50.29   20.70
  -1  10   0   62.39   28.00
  -1  10   0   27.90   19.00
  -1  10   0   62.39   14.60
  -1  10   0   67.69   23.60
  -1  10   0   54.39   19.40
   0 -10   0  684.83   50.59
   0 -10   0  724.23   44.90
   0 -10   0  681.43   49.50
   0 -10   0  646.64   56.59
   0 -10   0  617.44   63.39
   0  10   0  632.54   49.40
   0  10   0  640.84   45.70
   0  10   0  667.33   49.90
   0  10   0  718.63   59.19
   0  10   0  501.15   60.89
   0  10   0  581.84   54.49
   0  10   0  604.94   71.39
  -1 -10   0 1144.29   74.69
  -1 -10   0 1208.98   81.29
  -1 -10   0 1231.08   66.69
  -1 -10   0 1179.08   86.29
  -1 -10   0 1156.08   74.79
  -1 -10   0 1348.17   73.19
  -1 -10   0 1107.29   70.89
   1  10   0 1352.06   74.59
   1  10   0 1242.48   75.99
   1  10   0 1219.28   82.79
   1  10   0 1190.48   79.49
   1  10   0 1246.78   79.99
   1  10   0 1145.59   72.99
   1  10   0 1113.49   90.09
  -2 -10   0   41.10   16.10
  -2 -10   0   24.10   20.70
  -2 -10   0   20.90   17.30
  -2 -10   0   36.20   26.60
  -2 -10   0   59.69   18.30
   2  10   0   58.59   28.70
   2  10   0   51.69   14.20
   2  10   0   82.29   22.80
   2  10   0   69.99   19.60
   2  10   0   73.39   20.20
   2  10   0   56.49   21.00
   2  10   0   95.19   23.70
  -3 -10   0  586.34   43.40
  -3 -10   0  502.15  103.79
  -3 -10   0  516.05   46.80
   3  10   0  397.26   55.19
   3  10   0  515.45   46.60
   3  10   0  586.54   45.00
   3  10   0  460.85   45.10
   3  10   0  551.84   48.10
   3  10   0  521.25   56.09
   3  10   0  469.25   49.60
  -4 -10   0  505.45   42.70
  -4 -10   0  500.05   54.99
  -4 -10   0  562.84   45.30
  -4 -10   0  580.84   49.60
  -4 -10   0  676.93   82.49
   4  10   0  561.34   64.99
   4  10   0  598.24   56.29
   4  10   0  482.55   45.30
   4  10   0  479.25   62.09
   4  10   0  544.55   47.50
   4  10   0  601.84   50.19
   4  10   0  625.64   51.79
   4  10   0  426.16   51.59
  -5 -10   0   19.80   24.50
  -5 -10   0   50.79   40.50
  -5 -10   0   55.99   27.20
   5  10   0   15.70   24.90
   5  10   0   56.19   22.10
   5  10   0   11.20   16.90
   5  10   0   92.89   31.60
   5  10   0   41.90   21.20
   5  10   0   67.19   22.20
   5  10   0   14.70   18.00
   5  10   0   -2.30   24.20
  -6 -10   0   37.40   41.80
  -6 -10   0  -16.30   23.70
  -6 -10   0  -33.20   14.80
   6  10   0   10.50   22.70
   6  10   0  -18.50   16.30
   6  10   0    2.90   19.60
   6  10   0   44.00   21.10
   6  10   0   -9.80   22.70
   6  10   0  -15.80   32.40
   6  10   0   18.10   21.10
  -7 -10   0   96.99   47.90
  -7 -10   0   99.69   24.00
  -7 -10   0   54.39   31.30
   7  10   0   55.79   39.70
   7  10   0  143.79   32.80
   7  10   0  169.18   34.50
   7  10   0  128.29   28.20
   7  10   0  164.48   32.20
   7  10   0  124.19   27.20
   7  10   0   56.49   25.10
  -8 -10   0    8.80   28.90
  -8 -10   0    8.60   42.30
  -8 -10   0    0.40   17.50
   8  10   0   73.69   29.10
   8  10   0  -14.60   21.50
   8  10   0    5.70   26.70
   8  10   0    7.90   28.60
   8  10   0   24.70   20.80
   8  10   0   22.50   25.00
  -9 -10   0   38.80   24.10
  -9 -10   0   41.50   35.50
  -9 -10   0   16.10   84.69
   9  10   0   57.09   40.70
   9  10   0   31.40   30.70
   9  10   0   40.50   29.20
   9  10   0   -3.60   25.70
   9  10   0   26.30   22.80
 -10 -10   0   29.30   25.70
 -10 -10   0   64.89   55.49
 -10 -10   0   70.49   39.80
  10  10   0   28.90   24.80
  10  10   0   51.89   35.10
  10  10   0   22.60   33.60
  10  10   0   63.49   34.90
 -11 -10   0  -78.29   26.90
 -11 -10   0   12.30   41.10
 -11 -10   0   95.99   59.19
  11  10   0   -0.10   23.90
  11  10   0   38.90   37.60
  11  10   0  -41.50   29.80
  11  10   0  -55.09   24.60
  11  10   0   40.10   33.60
 -12 -10   0    0.10   55.09
 -12 -10   0   49.00   49.10
  12  10   0  -26.80   29.10
  12  10   0   43.50   32.40
  12  10   0  -36.70   23.30
  11 -11   0   25.70   60.49
  11 -11   0  -58.79   41.10
  11 -11   0  -45.80   34.10
 -11  11   0   54.39   41.00
 -11  11   0  -35.80   34.10
 -11  11   0  -42.90   41.30
  10 -11   0   17.90   55.09
  10 -11   0   16.00   33.80
  10 -11   0  -38.80   34.70
 -10  11   0  -35.10   33.50
 -10  11   0   13.50   35.70
 -10  11   0   40.50   35.20
 -10  11   0   -0.50   20.00
 -10  11   0  -54.39   40.10
   9 -11   0    2.60   80.29
   9 -11   0  -11.00   21.00
   9 -11   0   28.50   33.80
   9 -11   0  -15.00   36.00
  -9  11   0   22.60   32.20
  -9  11   0   -6.00   28.20
  -9  11   0    7.30   33.80
  -9  11   0   57.59   37.50
   8 -11   0   83.09   27.20
   8 -11   0   67.69   45.10
   8 -11   0   87.49   57.29
   8 -11   0   99.59   21.80
  -8  11   0   64.69   32.10
  -8  11   0  217.38   49.40
  -8  11   0   10.00   48.30
  -8  11   0  142.69   42.80
  -8  11   0   68.39   33.30
   7 -11   0  278.67   52.29
   7 -11   0  298.97   48.00
   7 -11   0  192.58   23.80
   7 -11   0   99.79   39.40
   7 -11   0  170.18   58.99
  -7  11   0  209.78   45.90
  -7  11   0  236.38   67.29
  -7  11   0  168.28   51.79
  -7  11   0  168.18   38.30
   6 -11   0   90.79   39.80
   6 -11   0  107.89   34.80
   6 -11   0   -0.20   43.50
   6 -11   0  101.99   37.50
   6 -11   0  100.99   17.80
  -6  11   0  163.68   34.40
  -6  11   0   61.59   35.90
  -6  11   0  168.88   40.10
  -6  11   0   68.39   30.90
  -6  11   0  105.99   64.89
  -6  11   0   39.00   46.80
   5 -11   0  -11.40   22.10
   5 -11   0   17.90   23.80
   5 -11   0    5.40   12.00
   5 -11   0  -26.80   26.90
   5 -11   0   -2.90   39.20
   5 -11   0  -10.30   17.50
   5 -11   0  -29.30   17.50
  -5  11   0   -5.10   25.90
  -5  11   0  -31.80   28.20
  -5  11   0   19.90   34.10
  -5  11   0  -10.70   23.20
  -5  11   0    0.90   28.70
  -5  11   0   31.70   36.90
   4 -11   0    0.00   11.60
   4 -11   0   39.90   27.00
   4 -11   0   10.30   15.30
   4 -11   0   28.70   23.00
   4 -11   0  -34.30   34.60
   4 -11   0  -21.50   21.50
  -4  11   0   29.70   31.50
  -4  11   0  -45.30   32.50
  -4  11   0   10.50   27.70
  -4  11   0   26.30   23.50
   3 -11   0   33.00   12.70
   3 -11   0   16.30   22.70
   3 -11   0    8.00   34.10
   3 -11   0   27.60   25.20
   3 -11   0   28.80   19.60
  -3  11   0   34.90   22.80
  -3  11   0   20.60   27.50
  -3  11   0   37.60   30.20
  -3  11   0   49.20   33.20
  -3  11   0   -5.70   28.50
  -3  11   0   49.00   22.80
  -3  11   0    0.30   21.20
   2 -11   0   -5.20   20.20
   2 -11   0  -14.00   11.00
   2 -11   0   -8.40   31.80
   2 -11   0   23.20   21.50
   2 -11   0   -5.30   15.00
  -2  11   0   14.80   20.70
  -2  11   0   -3.60   20.70
  -2  11   0  -15.20   22.20
  -2  11   0   20.40   18.70
  -2  11   0  -12.90   28.30
  -2  11   0    6.70   27.60
  -2  11   0   10.20   30.30
   1 -11   0  113.99   18.30
   1 -11   0   53.49   36.30
   1 -11   0   88.79   24.40
   1 -11   0  105.19   19.00
  -1  11   0   84.19   28.70
  -1  11   0  131.39   20.10
  -1  11   0  144.89   35.30
  -1  11   0  134.69   26.70
  -1  11   0   87.89   35.30
  -1  11   0   89.09   28.20
  -1  11   0   69.99   23.30
   0 -11   0  534.35   50.09
   0 -11   0  637.94   47.10
   0 -11   0  680.33   44.70
   0  11   0  539.45   49.40
   0  11   0  497.35   56.59
   0  11   0  578.44   49.30
   0  11   0  526.75   44.00
   0  11   0  580.14   64.29
   0  11   0  507.25   51.29
   0  11   0  646.34   55.59
  -1 -11   0   39.40   24.20
  -1 -11   0   -1.80   28.40
  -1 -11   0   38.60   18.80
  -1 -11   0   36.50   16.50
   1  11   0  -21.60   25.40
   1  11   0   79.39   33.10
   1  11   0   22.50   22.60
   1  11   0   49.30   20.20
   1  11   0    2.50   17.00
   1  11   0   13.20   17.70
   1  11   0   18.60   21.00
   1  11   0   12.60   19.70
  -2 -11   0   74.79   21.90
  -2 -11   0   66.79   33.30
  -2 -11   0  123.39   28.30
  -2 -11   0  123.09   23.30
   2  11   0   80.29   24.20
   2  11   0   89.89   18.20
   2  11   0   96.49   35.70
   2  11   0  111.39   25.10
   2  11   0  116.09   28.20
   2  11   0  112.39   26.50
   2  11   0   88.29   23.90
   2  11   0   92.69   22.40
   2  11   0   72.59   35.80
  -3 -11   0  393.76   66.09
  -3 -11   0  421.16   39.80
  -3 -11   0  373.26   38.60
  -3 -11   0  279.17   47.30
   3  11   0  474.75   43.70
   3  11   0  367.36   41.20
   3  11   0  350.66   50.29
   3  11   0  388.46   46.80
   3  11   0  381.66   42.90
   3  11   0  483.55   44.40
   3  11   0  341.77   52.59
  -4 -11   0  -58.59   34.30
  -4 -11   0   -1.80   18.30
   4  11   0   55.39   26.60
   4  11   0   -8.30   15.10
   4  11   0  -19.10   18.20
   4  11   0  -31.30   15.70
   4  11   0   11.10   20.80
   4  11   0  -23.90   22.60
   4  11   0  -48.00   15.70
  -5 -11   0  280.07   47.00
  -5 -11   0  235.38   32.80
  -5 -11   0  295.27   66.89
   5  11   0  202.68   48.30
   5  11   0  267.37   43.80
   5  11   0  267.87   39.20
   5  11   0  308.87   47.10
   5  11   0  332.87   41.50
   5  11   0  269.87   35.50
   5  11   0  256.97   36.80
   5  11   0  257.87   44.70
  -6 -11   0  282.77   36.70
  -6 -11   0  372.36   69.79
  -6 -11   0  375.46   52.29
   6  11   0  378.66   42.30
   6  11   0  420.36   58.89
   6  11   0  297.77   44.30
   6  11   0  434.26   49.20
   6  11   0  308.97   42.90
   6  11   0  416.96   47.20
   6  11   0  247.78   46.90
  -7 -11   0   22.00   19.00
  -7 -11   0  100.59   32.80
  -7 -11   0   57.69   48.30
   7  11   0   15.10   20.70
   7  11   0   40.40   25.40
   7  11   0   26.80   22.30
   7  11   0   64.09   31.00
   7  11   0   12.00   25.00
  -8 -11   0   49.60   35.40
  -8 -11   0   69.79   25.80
   8  11   0  172.48   52.99
   8  11   0  116.29   34.50
   8  11   0   70.29   25.50
   8  11   0  102.49   28.10
   8  11   0   86.09   31.50
   8  11   0  146.79   35.30
  -9 -11   0   70.99   25.40
  -9 -11   0   41.30   49.90
  -9 -11   0  -13.60   35.30
   9  11   0    9.00   32.70
   9  11   0   56.79   25.30
   9  11   0  113.39   35.10
   9  11   0   51.09   29.60
   9  11   0   17.30   26.70
 -10 -11   0    2.50   38.20
 -10 -11   0   18.00   25.50
 -10 -11   0   35.80   50.69
  10  11   0   -3.50   24.00
  10  11   0   47.50   44.30
  10  11   0   -9.30   29.10
  10  11   0  -14.90   26.00
  10  11   0   38.40   29.10
  10  11   0    4.40   31.70
 -11 -11   0  -13.20   53.09
 -11 -11   0  112.79   48.50
  11  11   0   -5.80   27.40
  11  11   0    3.30   29.60
  11  11   0   -8.30   29.10
  10 -12   0  -63.69   37.40
  10 -12   0   54.39   59.29
  10 -12   0  101.99   45.00
 -10  12   0    6.40   38.50
   9 -12   0  -16.10   22.80
   9 -12   0   -4.20   55.29
   9 -12   0   26.90   39.90
   9 -12   0   74.59   39.40
  -9  12   0   23.20   46.00
  -9  12   0    1.50   37.80
  -9  12   0   39.80   36.90
  -9  12   0   -8.10   32.20
  -9  12   0  129.79   45.90
   8 -12   0   87.09   40.40
   8 -12   0  100.99   22.70
   8 -12   0   59.39   44.60
   8 -12   0  126.79   60.69
   8 -12   0  116.19   28.40
  -8  12   0  105.09   44.90
  -8  12   0   90.39   53.19
  -8  12   0  130.59   38.90
  -8  12   0   82.09   37.20
  -8  12   0  123.19   44.70
   7 -12   0   58.79   34.90
   7 -12   0   65.59   18.40
   7 -12   0   53.29   53.39
   7 -12   0  111.29   36.60
  -7  12   0   52.99   45.50
  -7  12   0    2.80   35.90
  -7  12   0   41.20   31.10
  -7  12   0  -16.70   27.30
  -7  12   0   58.99   36.30
   6 -12   0   10.20   29.70
   6 -12   0   35.90   30.80
   6 -12   0   22.20   13.80
   6 -12   0    2.30   20.60
  -6  12   0  -23.50   28.20
  -6  12   0  -31.00   38.80
  -6  12   0   46.00   30.40
  -6  12   0    3.20   37.70
  -6  12   0  -33.60   23.90
  -6  12   0   11.30   32.50
   5 -12   0    2.10   17.70
   5 -12   0  -20.80   11.30
   5 -12   0    8.10   26.50
   5 -12   0    1.90   43.90
   5 -12   0  -47.80   23.90
   5 -12   0   57.19   24.40
  -5  12   0   -4.50   35.30
  -5  12   0  -53.19   21.40
   4 -12   0  -32.40   37.60
   4 -12   0   47.10   28.40
   4 -12   0   56.69   14.80
  -4  12   0   26.90   25.40
  -4  12   0   47.90   29.40
  -4  12   0   20.20   30.20
  -4  12   0  124.69   44.80
   3 -12   0  -12.30   12.20
   3 -12   0   26.30   23.10
   3 -12   0    6.60   24.30
   3 -12   0    4.70   16.90
   3 -12   0    5.50   37.10
  -3  12   0   23.90   30.80
  -3  12   0   54.79   37.90
  -3  12   0  -47.80   25.40
  -3  12   0  -27.00   30.10
  -3  12   0   14.60   23.10
  -3  12   0   -2.10   23.40
  -3  12   0   -7.90   26.70
   2 -12   0   47.90   39.70
   2 -12   0   96.09   28.20
   2 -12   0   77.59   24.50
   2 -12   0   74.69   18.70
   2 -12   0   61.79   19.50
  -2  12   0   77.99   23.60
  -2  12   0   56.19   28.00
  -2  12   0   74.99   33.50
  -2  12   0   31.10   25.50
  -2  12   0  104.39   32.40
  -2  12   0  113.09   37.30
  -2  12   0   56.39   38.40
   1 -12   0   34.50   38.60
   1 -12   0  131.99   25.20
   1 -12   0   97.39   18.80
   1 -12   0  125.39   21.60
  -1  12   0  136.49   31.60
  -1  12   0   71.69   33.00
  -1  12   0   92.49   25.80
  -1  12   0  109.19   21.60
  -1  12   0  117.59   29.50
  -1  12   0  122.39   42.90
  -1  12   0   98.39   29.50
  -1  12   0   67.79   34.80
   0 -12   0   73.49   20.00
   0 -12   0  134.99   40.70
   0 -12   0   75.99   20.10
   0 -12   0  122.29   25.40
   0 -12   0  103.29   22.20
   0  12   0   98.59   29.50
   0  12   0  195.58   30.90
   0  12   0  146.89   28.20
   0  12   0  149.69   25.10
   0  12   0  124.79   40.00
   0  12   0  110.49   30.20
  -1 -12   0   11.70   31.20
  -1 -12   0   -9.10   17.40
  -1 -12   0  -21.00   14.80
   1  12   0  -36.80   18.10
   1  12   0  -46.80   26.10
   1  12   0  100.89   32.70
   1  12   0  -22.80   17.00
   1  12   0  -25.40   24.20
   1  12   0  -37.10   16.80
   1  12   0  -11.90   14.90
  -2 -12   0  407.86   54.19
  -2 -12   0  330.67   40.70
   2  12   0  282.17   55.89
   2  12   0  515.35   49.30
   2  12   0  447.86   47.70
   2  12   0  314.17   38.00
   2  12   0  363.86   53.59
   2  12   0  367.06   41.80
   2  12   0  414.76   65.29
   2  12   0  444.26   40.70
  -3 -12   0   36.10   21.00
  -3 -12   0   27.40   31.50
  -3 -12   0    1.90   19.30
   3  12   0   65.59   21.80
   3  12   0   73.99   31.90
   3  12   0   38.70   21.90
   3  12   0   56.79   23.90
   3  12   0    2.10   18.30
   3  12   0   25.40   24.30
   3  12   0  -20.00   32.90
  -4 -12   0   -7.90   40.40
   4  12   0   -4.20   29.50
   4  12   0  105.49   36.30
   4  12   0    2.00   23.30
   4  12   0  -13.80   19.20
   4  12   0   39.40   24.60
   4  12   0   21.50   19.30
   4  12   0   26.70   21.60
  -5 -12   0   56.19   51.59
   5  12   0  136.79   33.60
   5  12   0  143.59   29.10
   5  12   0  155.38   31.80
   5  12   0  163.38   33.20
   5  12   0   69.19   36.30
   5  12   0   77.49   45.70
   5  12   0  174.18   40.90
   5  12   0   53.89   46.80
  -6 -12   0  105.59   55.59
  -6 -12   0   61.59   33.90
  -6 -12   0   27.60   20.00
   6  12   0   69.79   29.90
   6  12   0  -14.30   28.60
   6  12   0   21.30   21.80
   6  12   0   43.30   27.30
   6  12   0   22.60   25.40
   6  12   0   26.30   22.70
  -7 -12   0   31.70   33.20
  -7 -12   0  -22.20   21.70
   7  12   0   19.90   26.60
   7  12   0   50.79   27.70
   7  12   0   20.20   27.00
   7  12   0   36.50   24.30
   7  12   0    6.30   22.10
  -8 -12   0   71.59   58.29
  -8 -12   0  -17.00   36.00
   8  12   0  104.89   28.10
   8  12   0   66.09   34.50
   8  12   0   40.00   25.80
   8  12   0   41.10   28.90
   8  12   0   70.39   30.50
  -9 -12   0   52.59   40.50
  -9 -12   0   39.50   53.79
   9  12   0   62.69   34.60
   9  12   0   87.79   51.59
   9  12   0  145.69   40.90
   9  12   0   61.99   26.70
   9  12   0   55.89   27.80
 -10 -12   0   20.30   54.89
 -10 -12   0   14.20   44.20
  10  12   0   -8.20   30.10
  10  12   0  -27.60   22.00
  10  12   0   38.60   35.30
  10  12   0   27.30   29.40
 -11 -12   0    1.60   54.19
  11  12   0  -44.10   31.70
  11  12   0    9.60   35.30
  11  12   0    9.60   31.70
  11  12   0  -21.10   24.30
   9 -13   0  -60.89   61.19
   9 -13   0  -63.59   42.80
  -9  13   0    9.60   39.20
  -9  13   0   88.59   39.70
  -9  13   0   10.30   36.90
   8 -13   0    8.50   48.70
   8 -13   0   17.70   69.69
   8 -13   0    6.00   26.80
   8 -13   0   14.70   35.90
  -8  13   0   -1.70   36.10
  -8  13   0  -69.69   31.20
  -8  13   0   53.69   32.10
  -8  13   0   17.20   49.10
   7 -13   0   58.19   59.39
   7 -13   0   -9.00   23.10
   7 -13   0    4.90   33.30
   7 -13   0  -81.79   31.60
  -7  13   0  -31.60   43.00
  -7  13   0    2.10   28.90
  -7  13   0   15.00   35.90
  -7  13   0    2.60   41.90
   6 -13   0   -8.40   29.70
   6 -13   0   68.19   53.09
   6 -13   0   50.59   21.60
   6 -13   0   39.20   33.80
   6 -13   0   70.49   19.30
  -6  13   0    5.10   30.20
  -6  13   0   13.80   35.90
  -6  13   0   93.79   46.00
  -6  13   0   60.29   36.00
   5 -13   0   26.80   30.40
   5 -13   0   -8.60   15.00
   5 -13   0   -6.40   28.50
  -5  13   0   26.20   33.20
  -5  13   0   12.10   28.80
  -5  13   0   -2.60   38.30
  -5  13   0   15.10   34.80
   4 -13   0   46.80   32.00
   4 -13   0  -26.30   24.80
   4 -13   0  -24.80   14.60
   4 -13   0   -6.00   38.20
  -4  13   0   30.40   23.80
  -4  13   0  -94.39   35.50
  -4  13   0  -22.10   36.40
  -4  13   0    3.60   25.30
  -4  13   0   14.00   33.30
  -4  13   0   32.20   35.50
   3 -13   0  120.59   36.30
   3 -13   0   91.69   19.20
   3 -13   0   69.79   46.50
   3 -13   0   54.69   27.40
   3 -13   0   83.89   23.20
  -3  13   0   74.09   27.30
  -3  13   0   44.00   31.10
  -3  13   0  114.99   41.20
  -3  13   0   62.89   34.50
  -3  13   0   92.79   53.39
  -3  13   0    6.10   36.70
   2 -13   0   72.99   24.80
   2 -13   0   84.79   20.30
   2 -13   0   61.39   42.90
   2 -13   0  105.29   20.60
   2 -13   0   78.19   30.70
  -2  13   0   42.90   34.70
  -2  13   0   15.90   26.20
  -2  13   0    9.00   31.10
  -2  13   0   81.89   42.80
  -2  13   0   68.19   42.00
  -2  13   0   38.20   24.80
  -2  13   0   46.70   29.80
   1 -13   0  191.58   29.60
   1 -13   0  209.88   54.19
   1 -13   0  279.07   32.70
  -1  13   0  185.38   40.80
  -1  13   0  167.48   33.10
  -1  13   0  242.28   28.90
  -1  13   0  178.78   35.60
  -1  13   0  263.47   52.89
   0 -13   0   21.00   22.20
   0 -13   0   41.30   42.20
   0 -13   0    7.90   17.50
   0  13   0   61.89   36.90
   0  13   0   43.70   32.90
   0  13   0   31.90   17.90
   0  13   0   21.10   23.40
   0  13   0   78.39   48.10
   0  13   0   58.89   25.60
   0  13   0   54.69   23.10
  -1 -13   0  179.68   31.10
  -1 -13   0   98.09   42.10
   1  13   0  111.19   25.60
   1  13   0   93.09   41.30
   1  13   0   74.79   27.80
   1  13   0   80.99   26.30
   1  13   0   63.89   38.40
   1  13   0  169.08   27.50
  -2 -13   0   69.59   23.50
  -2 -13   0   99.39   25.20
  -2 -13   0   67.39   37.70
   2  13   0   99.69   24.90
   2  13   0   61.39   27.00
   2  13   0   95.99   36.80
   2  13   0   47.10   22.30
   2  13   0   55.19   30.00
   2  13   0   50.49   25.70
  -3 -13   0   56.49   34.50
  -3 -13   0  -13.00   19.40
   3  13   0   29.10   21.00
   3  13   0  -18.00   20.20
   3  13   0  -34.00   22.40
   3  13   0  -12.70   18.50
   3  13   0  -19.70   24.60
   3  13   0   -3.10   31.90
   3  13   0  -16.80   19.50
  -4 -13   0   70.49   23.70
  -4 -13   0  113.39   39.00
   4  13   0  123.39   30.60
   4  13   0   86.99   28.30
   4  13   0  121.99   39.60
   4  13   0  113.09   26.70
   4  13   0   80.19   29.80
   4  13   0  140.29   31.30
   4  13   0  107.09   40.00
  -5 -13   0   92.89   56.09
   5  13   0   52.29   23.90
   5  13   0   77.59   28.30
   5  13   0  106.29   31.40
   5  13   0  101.49   30.30
   5  13   0   51.69   29.80
   5  13   0   76.59   36.70
  -6 -13   0    1.30   56.59
   6  13   0   85.09   30.10
   6  13   0   67.99   25.20
   6  13   0   97.29   32.60
   6  13   0   12.80   23.30
   6  13   0   83.19   45.00
  -7 -13   0  185.38   33.60
  -7 -13   0  329.17   77.39
  -7 -13   0  183.18   50.59
   7  13   0  218.88   41.60
   7  13   0  178.58   45.10
   7  13   0  216.18   42.40
   7  13   0  152.38   37.90
   7  13   0  223.78   38.00
   7  13   0  195.68   34.50
  -8 -13   0  181.88   32.40
  -8 -13   0  109.69   67.29
  -8 -13   0  123.59   44.90
   8  13   0  175.28   33.60
   8  13   0  116.29   36.50
   8  13   0  121.19   31.80
   8  13   0   99.79   35.40
   8  13   0  138.69   43.90
   8  13   0  176.88   52.59
  -9 -13   0  -26.60   52.39
  -9 -13   0   77.59   45.40
   9  13   0  -59.09   26.90
   9  13   0   18.40   33.10
   9  13   0   -5.20   22.30
   9  13   0   -3.00   24.70
   9  13   0   -9.30   25.00
 -10 -13   0  -52.39   54.79
  10  13   0  -26.60   33.50
  10  13   0  -30.50   24.70
  10  13   0   76.89   38.30
   8 -14   0   23.10   29.30
   8 -14   0    5.00   43.40
   8 -14   0 -131.09   57.69
   8 -14   0  -90.79   50.59
  -8  14   0    8.10   32.70
  -8  14   0  -24.60   34.90
  -8  14   0  -13.70   38.60
   7 -14   0   73.19   44.70
   7 -14   0    0.60   64.39
  -7  14   0    7.80   36.50
  -7  14   0    6.40   30.50
  -7  14   0   53.69   41.20
  -7  14   0   40.10   51.79
   6 -14   0   56.89   42.40
   6 -14   0  103.19   43.40
   6 -14   0   25.60   56.19
  -6  14   0   77.19   50.69
  -6  14   0   66.09   38.50
  -6  14   0   46.50   39.60
  -6  14   0   -2.90   31.30
   5 -14   0   17.20   30.50
   5 -14   0  -21.00   48.40
   5 -14   0   57.49   36.40
  -5  14   0   -6.40   32.50
  -5  14   0   43.60   37.60
  -5  14   0   44.60   44.20
  -5  14   0   47.20   44.60
  -5  14   0  -39.50   29.40
  -5  14   0  -56.29   37.20
   4 -14   0   36.10   17.20
   4 -14   0  -43.20   26.20
   4 -14   0  -29.20   29.80
   4 -14   0   12.90   45.20
  -4  14   0  -39.30   34.50
  -4  14   0 -101.29   69.39
  -4  14   0  -14.60   31.00
  -4  14   0   41.60   41.00
  -4  14   0    6.10   25.20
  -4  14   0  -16.80   25.90
   3 -14   0  -72.09   41.90
   3 -14   0   -6.80   20.70
   3 -14   0   46.20   55.39
  -3  14   0  -35.80   35.10
  -3  14   0   -2.90   31.30
  -3  14   0  -21.10   36.90
  -3  14   0  -21.80   21.80
  -3  14   0  -40.70   39.80
   2 -14   0  -17.60   20.00
   2 -14   0   44.20   17.90
   2 -14   0  -12.50   44.10
   2 -14   0   -8.00   17.50
  -2  14   0    1.70   33.90
  -2  14   0  -24.00   20.80
  -2  14   0   44.50   40.20
  -2  14   0   18.00   31.60
  -2  14   0   14.00   26.10
  -2  14   0  -19.60   25.40
   1 -14   0   -7.90   17.40
   1 -14   0   47.10   25.80
   1 -14   0    5.90   43.60
  -1  14   0   18.00   23.10
  -1  14   0   71.69   24.90
  -1  14   0   20.60   26.30
  -1  14   0  111.99   36.40
  -1  14   0   15.10   28.70
  -1  14   0   29.10   41.70
  -1  14   0  -23.80   29.90
   0 -14   0   85.79   25.80
   0 -14   0   10.80   22.80
   0 -14   0   45.50   42.50
   0  14   0   27.80   26.10
   0  14   0   15.30   17.20
   0  14   0   33.10   30.80
   0  14   0    2.80   21.10
   0  14   0    5.80   25.00
   0  14   0   13.30   27.40
  -1 -14   0   29.10   22.20
  -1 -14   0   16.60   22.70
  -1 -14   0   65.79   39.90
   1  14   0   41.20   27.90
   1  14   0   -3.70   46.30
   1  14   0    7.10   23.00
   1  14   0  -26.60   36.80
   1  14   0   21.50   19.20
   1  14   0   18.70   25.30
  -2 -14   0   34.50   24.60
  -2 -14   0  -51.79   35.40
  -2 -14   0  -15.50   21.50
   2  14   0   23.00   23.60
   2  14   0    9.00   23.60
   2  14   0  -14.60   18.80
   2  14   0   52.49   30.50
   2  14   0   16.40   20.80
  -3 -14   0   29.40   22.80
  -3 -14   0   12.50   38.30
   3  14   0   19.90   24.80
   3  14   0    2.40   24.20
   3  14   0   -5.30   22.10
   3  14   0    6.10   22.00
   3  14   0   38.30   24.10
   3  14   0   49.20   28.20
  -4 -14   0   66.09   39.10
   4  14   0   56.19   29.90
   4  14   0   75.19   30.30
   4  14   0   32.30   23.30
   4  14   0   40.80   26.40
   4  14   0   62.49   40.60
   4  14   0   33.10   24.70
   4  14   0   37.00   24.60
  -5 -14   0  -44.30   37.40
  -5 -14   0   14.80   23.70
  -5 -14   0   84.69   54.89
   5  14   0    3.40   34.30
   5  14   0   -6.00   24.00
   5  14   0   23.50   22.90
   5  14   0   27.90   23.60
  -6 -14   0  135.69   65.59
   6  14   0  126.79   35.60
   6  14   0   70.09   40.10
   6  14   0   99.29   30.90
   6  14   0  100.59   30.70
   6  14   0   78.39   30.10
   6  14   0   58.09   35.70
  -7 -14   0  -81.89   52.19
   7  14   0   19.70   27.60
   7  14   0   28.80   35.50
   7  14   0   16.60   28.10
   7  14   0  -10.30   22.50
  -8 -14   0  -14.00   46.30
  -8 -14   0  -49.20   51.09
   8  14   0   11.50   26.50
   8  14   0  -48.60   32.10
   8  14   0  -40.70   27.60
   8  14   0  -23.40   21.10
  -9 -14   0  -65.19   56.79
   9  14   0  -17.80   38.20
   9  14   0  -28.50   28.10
   9  14   0   38.90   26.00
   9  14   0   47.30   33.00
   7 -15   0   35.60   43.60
   7 -15   0  -45.20   37.30
   7 -15   0   79.59   70.79
  -7  15   0   71.79   63.19
  -7  15   0   29.20   40.30
  -7  15   0    1.00   45.80
   6 -15   0  -55.59   61.59
   6 -15   0  152.78   45.50
  -6  15   0   -7.70   34.80
  -6  15   0  -15.70   54.69
  -6  15   0   65.39   41.60
  -6  15   0   29.50   34.20
   5 -15   0    1.90   34.00
   5 -15   0  -27.80   59.09
   5 -15   0  -39.60   27.00
  -5  15   0  -35.30   35.70
  -5  15   0   65.59   50.29
  -5  15   0  -27.30   28.60
  -5  15   0   27.30   34.80
   4 -15   0  -18.60   85.59
   4 -15   0   79.29   24.60
   4 -15   0   30.60   34.90
  -4  15   0    6.40   37.80
  -4  15   0   22.90   43.00
  -4  15   0   35.30   33.60
  -4  15   0  -65.59   42.20
  -4  15   0   34.80   35.40
   3 -15   0  -14.00   20.10
   3 -15   0    8.60   31.90
   3 -15   0   76.79   50.19
  -3  15   0   -0.60   43.60
  -3  15   0   56.49   45.90
  -3  15   0  -74.29   27.00
  -3  15   0   -7.70   30.60
  -3  15   0  -96.39   33.60
  -3  15   0   -9.90   26.00
   2 -15   0   -6.20   50.69
   2 -15   0  -26.30   16.80
  -2  15   0  -48.00   34.00
  -2  15   0  -16.00   33.50
  -2  15   0   20.10   26.70
  -2  15   0  -30.40   39.20
  -2  15   0    7.50   32.40
   1 -15   0   36.20   26.80
   1 -15   0   41.50   28.70
   1 -15   0  -36.00   45.30
  -1  15   0   52.19   42.80
  -1  15   0   -3.90   39.90
  -1  15   0   26.50   30.70
  -1  15   0   16.00   40.80
  -1  15   0   -6.00   37.90
  -1  15   0   22.00   26.20
   0 -15   0   36.40   25.40
   0 -15   0    1.60   45.70
   0 -15   0   23.30   27.70
   0  15   0   -7.50   23.50
   0  15   0   78.09   43.50
   0  15   0   -8.80   31.90
   0  15   0   11.90   26.90
   0  15   0   -5.10   28.50
  -1 -15   0  -29.50   22.20
  -1 -15   0   -2.70   23.50
  -1 -15   0   80.19   45.90
   1  15   0   35.00   27.90
   1  15   0   37.70   36.80
   1  15   0   -2.30   18.70
   1  15   0   -4.30   26.40
   1  15   0   16.50   42.00
   1  15   0   -9.20   25.20
   1  15   0   -6.90   34.10
  -2 -15   0  -53.09   40.80
  -2 -15   0   14.70   24.10
   2  15   0   54.69   27.60
   2  15   0   67.89   43.00
   2  15   0   34.00   28.20
   2  15   0   14.10   23.40
   2  15   0    7.10   23.10
  -3 -15   0   -9.00   42.10
   3  15   0  -70.79   28.10
   3  15   0    9.10   26.10
   3  15   0  -15.70   38.90
   3  15   0   22.60   25.30
   3  15   0   44.80   28.00
   3  15   0   37.10   25.00
  -4 -15   0   21.40   44.20
  -4 -15   0  -33.00   23.30
   4  15   0   46.60   26.20
   4  15   0   29.20   31.60
   4  15   0  -15.60   24.10
   4  15   0   23.60   33.70
   4  15   0   82.89   41.30
   4  15   0    5.70   25.00
   4  15   0    0.50   24.90
  -5 -15   0  175.88   36.00
  -5 -15   0   68.49   52.89
   5  15   0  122.99   42.20
   5  15   0  137.19   34.30
   5  15   0  127.49   35.90
   5  15   0  194.08   41.60
   5  15   0  108.09   32.70
   5  15   0  128.59   48.20
  -6 -15   0   73.99   50.29
  -6 -15   0  128.89   61.39
   6  15   0   28.30   37.90
   6  15   0    5.00   43.60
   6  15   0   58.79   28.10
   6  15   0   48.00   26.90
   6  15   0   38.60   33.10
  -7 -15   0   -8.90   54.79
   7  15   0  -62.99   35.10
   7  15   0   42.40   30.50
   7  15   0   12.90   29.10
   7  15   0   -0.70   27.30
   7  15   0  -32.00   25.00
  -8 -15   0 -111.29   54.49
   8  15   0   49.20   40.40
   8  15   0    4.30   22.40
   6 -16   0   29.60   42.90
  -6  16   0   42.40   60.79
  -6  16   0  -60.49   36.20
   5 -16   0   40.30   38.90
   5 -16   0  -18.90   72.49
  -5  16   0   -6.80   27.10
   4 -16   0   58.69   67.29
  -4  16   0  -10.90   31.90
  -4  16   0   47.20   44.90
  -4  16   0  -75.79   24.90
  -4  16   0  -62.09   39.60
   3 -16   0   24.00   56.39
  -3  16   0   -9.30   32.70
  -3  16   0   71.49   36.10
  -3  16   0   -9.20   40.10
  -3  16   0   41.60   44.10
   2 -16   0  -18.80   30.50
  -2  16   0   -7.20   28.40
  -2  16   0   20.10   26.40
  -2  16   0  -80.49   37.90
  -2  16   0   58.29   30.60
  -2  16   0   -5.20   38.60
   1 -16   0   36.00   32.90
   1 -16   0  153.48   61.49
  -1  16   0 -120.29   60.89
  -1  16   0  -23.50   29.80
  -1  16   0   50.89   28.80
  -1  16   0   71.79   47.40
  -1  16   0   -4.10   29.70
  -1  16   0  -34.00   46.30
   0 -16   0   29.50   33.40
   0 -16   0   37.10   58.69
   0 -16   0    5.30   28.40
   0  16   0   23.40   29.90
   0  16   0  -14.10   32.10
   0  16   0   47.90   44.50
   0  16   0    0.00   20.10
   0  16   0    7.40   42.80
   0  16   0  -11.00   27.40
  -1 -16   0   56.69   51.89
  -1 -16   0   34.10   29.40
   1  16   0    2.70   27.50
   1  16   0   43.60   43.80
   1  16   0   46.80   33.40
   1  16   0   15.80   31.50
   1  16   0   75.79   43.10
  -2 -16   0  -40.80   52.79
   2  16   0   61.39   47.20
   2  16   0   -5.60   28.70
   2  16   0  -24.40   22.80
   2  16   0  -36.00   21.10
   2  16   0   33.70   26.10
  -3 -16   0    1.10   50.59
   3  16   0   83.59   41.30
   3  16   0  -27.50   28.50
   3  16   0   17.30   26.00
   3  16   0   44.50   26.80
   3  16   0    0.20   26.90
  -4 -16   0    6.60   53.59
   4  16   0   16.50   30.10
   4  16   0    9.00   28.10
   4  16   0   48.20   45.20
   4  16   0   16.80   28.10
   4  16   0   19.10   25.10
   5  16   0    6.50   28.30
   5  16   0   11.10   26.10
   5  16   0   -7.10   40.30
   5  16   0  -33.60   26.90
   5  16   0   24.80   27.60
   6  16   0  -53.29   40.40
   6  16   0    3.60   24.60
   6  16   0   -1.30   29.70
   6  16   0    0.80   27.80
  -3  17   0  -13.40   30.40
  -3  17   0  -37.10   41.00
  -3  17   0  -34.70   32.20
   2 -17   0 -117.49   62.19
  -2  17   0  -32.00   49.10
  -2  17   0  110.69   38.60
  -2  17   0   54.09   50.49
  -2  17   0   23.70   40.10
   1 -17   0   72.09   75.39
  -1  17   0   47.20   47.40
  -1  17   0  -25.90   29.40
  -1  17   0   19.70   57.69
   0 -17   0  228.08   79.99
   0  17   0   74.99   24.90
   0  17   0   70.29   33.60
   0  17   0   45.40   50.99
  -1 -17   0  137.59   67.09
   1  17   0   84.99   46.20
   2  17   0   73.29   32.80
   2  17   0  -53.69   22.00
   2  17   0    7.20   46.60
   3  17   0   -8.10   30.10
   3  17   0   -9.00   27.70
   3  17   0   -5.00   26.70
   3  17   0   52.29   48.00
   4  17   0  -17.10   37.90
   4  17   0    7.60   27.40
   4  17   0    4.20   25.40
   3  17  -1   63.99   34.40
   3  17  -1   13.20   28.40
   3  17  -1   46.10   42.30
   3  17  -1   24.00   29.50
   2  17  -1  -13.70   29.40
   2  17  -1   33.10   53.89
   2  17  -1   74.19   40.80
  -2 -17   1   37.40   81.49
   1  17  -1   38.50   43.40
   1  17  -1   71.09   34.10
  -1 -17   1  134.89   64.99
   0  17  -1  -19.00   21.50
   0  17  -1   39.50   48.30
   0  17  -1   19.10   31.10
   0 -17   1   19.70   69.99
  -1  17  -1    4.20   37.20
  -1  17  -1   20.60   45.80
  -1  17  -1   43.10   33.30
   1 -17   1  -48.00   86.09
  -2  17  -1  -11.50   27.90
  -2  17  -1  -25.90   34.40
  -2  17  -1  -33.70   59.09
  -2  17  -1   -6.80   47.20
   2 -17   1 -190.68   76.69
  -3  17  -1   37.70   38.40
  -3  17  -1   55.49   39.40
  -3  17  -1   -5.80   45.10
   3 -17   1  -82.89   69.69
   6  16  -1   20.60   32.40
   6  16  -1   41.90   29.90
   6  16  -1  -73.99   38.50
   6  16  -1  -25.40   24.50
   5  16  -1  123.69   36.20
   5  16  -1   90.39   47.70
   5  16  -1   36.00   32.80
   4  16  -1   90.79   34.60
   4  16  -1  164.58   39.00
   4  16  -1   62.39   48.60
   4  16  -1  154.98   40.60
   4  16  -1  102.29   36.90
  -4 -16   1  196.38   69.99
   3  16  -1   18.20   31.30
   3  16  -1    8.40   28.50
   3  16  -1  -64.99   42.40
   3  16  -1   18.00   27.40
  -3 -16   1   -4.60   56.59
   2  16  -1   44.70   28.40
   2  16  -1  -39.40   38.80
   2  16  -1  -13.40   22.90
   2  16  -1   33.90   28.60
   2  16  -1   10.50   26.50
  -2 -16   1  -10.20   46.20
  -2 -16   1  -20.40   29.90
   1  16  -1    8.50   42.90
   1  16  -1   57.19   24.30
   1  16  -1   70.09   33.30
   1  16  -1   75.19   32.50
   1  16  -1   -8.90   29.90
  -1 -16   1   46.30   52.19
  -1 -16   1   12.70   30.50
   0  16  -1  -34.80   18.80
   0  16  -1    8.40   27.10
   0  16  -1   -4.80   31.60
   0  16  -1   24.10   30.30
   0  16  -1  -67.29   38.60
   0 -16   1   30.40   31.10
  -1  16  -1   18.60   29.10
  -1  16  -1   78.59   35.70
  -1  16  -1  -25.50   43.70
  -1  16  -1    6.20   29.70
   1 -16   1   54.89   31.50
   1 -16   1   61.89   37.10
  -2  16  -1  -16.10   31.20
  -2  16  -1   15.90   43.90
  -2  16  -1   -3.40   28.90
  -2  16  -1   88.89   45.10
  -2  16  -1   66.69   51.09
   2 -16   1   -1.10   60.19
  -3  16  -1  -10.00   47.90
  -3  16  -1    4.50   32.80
  -3  16  -1   43.90   35.30
  -3  16  -1   42.90   44.20
   3 -16   1  126.29   86.39
  -4  16  -1   23.10   31.90
  -4  16  -1   -2.20   42.40
  -4  16  -1   57.09   38.00
  -4  16  -1   25.10   43.50
   4 -16   1 -138.39   62.59
   4 -16   1    7.10   36.30
  -5  16  -1   79.59   35.30
   5 -16   1    3.90   75.69
   5 -16   1  -13.60   37.40
   7  15  -1   23.20   39.20
   7  15  -1   35.00   31.30
   7  15  -1   15.20   31.00
  -7 -15   1  -48.00   53.39
   6  15  -1   55.79   31.70
   6  15  -1   58.09   28.80
   6  15  -1   -3.20   37.80
   6  15  -1  -25.40   29.60
   6  15  -1   58.39   28.80
  -6 -15   1  113.69   62.69
  -6 -15   1  -10.70   49.40
   5  15  -1  354.06   50.19
   5  15  -1  318.57   45.40
   5  15  -1  340.47   49.99
   5  15  -1  416.96   63.79
   5  15  -1  274.37   49.70
  -5 -15   1  169.38   53.49
  -5 -15   1  212.28   61.09
   4  15  -1   84.89   41.30
   4  15  -1   28.60   28.70
   4  15  -1   66.59   30.60
   4  15  -1   26.40   57.79
   4  15  -1  107.69   44.10
  -4 -15   1   31.20   43.80
  -4 -15   1  116.09   52.19
   3  15  -1  -41.00   27.30
   3  15  -1   26.80   26.60
   3  15  -1   44.10   27.30
   3  15  -1   33.50   38.60
   3  15  -1    1.60   25.60
   3  15  -1   15.20   36.50
  -3 -15   1   29.40   25.30
  -3 -15   1  -20.80   45.30
   2  15  -1   54.59   42.30
   2  15  -1   46.60   36.40
   2  15  -1   34.70   31.10
   2  15  -1   95.99   32.20
   2  15  -1   96.49   29.30
  -2 -15   1   52.29   30.40
  -2 -15   1  169.58   51.89
   1  15  -1   -0.30   25.10
   1  15  -1  -17.20   21.40
   1  15  -1    8.90   39.10
   1  15  -1  -24.90   18.80
   1  15  -1   34.40   34.10
   1  15  -1   12.90   27.20
  -1 -15   1   73.39   43.40
  -1 -15   1   -1.90   24.20
   0  15  -1   21.40   26.10
   0  15  -1   -5.50   35.90
   0  15  -1   57.29   32.80
   0  15  -1   25.60   20.50
   0  15  -1  -21.00   38.40
   0 -15   1   14.10   26.70
   0 -15   1   49.20   29.50
   0 -15   1   -0.70   49.10
  -1  15  -1   60.09   37.30
  -1  15  -1   98.89   35.80
  -1  15  -1   91.19   43.80
  -1  15  -1   79.29   36.40
  -1  15  -1   61.39   52.19
  -1  15  -1   93.89   30.70
   1 -15   1   70.89   24.30
   1 -15   1  181.08   30.70
   1 -15   1   89.99   53.99
   1 -15   1  110.09   25.50
  -2  15  -1   46.00   33.20
  -2  15  -1   52.09   31.70
  -2  15  -1  159.88   53.29
  -2  15  -1   57.19   44.60
  -2  15  -1  119.29   50.79
  -2  15  -1  156.98   46.00
   2 -15   1   91.49   26.60
   2 -15   1  100.49   37.50
   2 -15   1   58.99   23.20
   2 -15   1   62.69   57.19
  -3  15  -1  -10.70   59.49
  -3  15  -1  -34.90   32.80
  -3  15  -1   -8.70   44.40
  -3  15  -1  -37.90   25.00
  -3  15  -1   49.20   32.60
   3 -15   1  -17.80   20.70
   3 -15   1   47.60   34.60
   3 -15   1   84.59   57.89
  -4  15  -1  -83.09   32.30
  -4  15  -1  -15.80   48.20
  -4  15  -1  -30.30   30.00
  -4  15  -1   62.69   32.60
  -4  15  -1  -22.60   27.40
  -4  15  -1  -16.70   42.40
   4 -15   1   -4.90   30.30
   4 -15   1   -4.40   27.90
   4 -15   1    6.60   34.60
   4 -15   1   17.80   23.90
   4 -15   1   28.10   49.30
  -5  15  -1   25.50   35.20
  -5  15  -1  -29.00   46.60
  -5  15  -1  -24.90   28.30
  -5  15  -1   20.50   36.40
   5 -15   1    3.50   40.50
   5 -15   1  -21.80   37.70
   5 -15   1   18.20   57.59
  -6  15  -1   28.00   33.00
  -6  15  -1   84.49   39.60
  -6  15  -1  109.69   53.69
  -6  15  -1   55.39   43.80
   6 -15   1   15.60   43.90
   6 -15   1   58.59   71.19
   6 -15   1  -37.90   42.60
  -7  15  -1  -34.20   53.89
  -7  15  -1  -75.09   43.70
   7 -15   1   -7.10   37.90
   7 -15   1   63.79   46.50
   9  14  -1   14.80   25.50
   9  14  -1   33.40   38.00
  -9 -14   1  -21.90   52.99
   8  14  -1   20.80   28.20
   8  14  -1  -19.60   37.80
   8  14  -1   19.30   31.60
   8  14  -1   11.00   30.40
  -8 -14   1  -14.20   49.00
  -8 -14   1  -82.59   55.39
   7  14  -1   19.30   29.50
   7  14  -1    0.10   26.80
   7  14  -1   20.70   33.90
   7  14  -1  -41.00   20.20
   7  14  -1  -41.10   26.30
  -7 -14   1   -8.20   53.39
   6  14  -1   42.20   39.20
   6  14  -1  -46.50   46.40
   6  14  -1   35.40   25.80
   6  14  -1   33.20   29.00
   6  14  -1  -16.00   47.20
   6  14  -1   23.00   26.70
  -6 -14   1   54.79   55.89
   5  14  -1  138.89   35.40
   5  14  -1  143.49   33.70
   5  14  -1  122.49   34.90
   5  14  -1  122.09   33.50
   5  14  -1   68.59   41.70
  -5 -14   1   62.49   30.60
   4  14  -1  106.49   32.20
   4  14  -1  179.88   61.89
   4  14  -1   37.00   28.90
   4  14  -1  128.69   43.00
   4  14  -1   35.30   27.30
   4  14  -1  100.59   31.30
  -4 -14   1   33.50   43.90
  -4 -14   1  114.79   29.80
   3  14  -1   20.80   24.40
   3  14  -1   28.60   23.70
   3  14  -1    0.70   35.00
   3  14  -1   -4.50   22.20
   3  14  -1   53.29   24.00
   3  14  -1   38.00   40.70
  -3 -14   1   68.19   41.70
  -3 -14   1   -5.00   23.20
   2  14  -1    9.80   25.10
   2  14  -1  -10.50   28.10
   2  14  -1   37.40   38.00
   2  14  -1   -8.10   24.00
   2  14  -1  -10.80   20.90
   2  14  -1    1.70   20.90
  -2 -14   1   -7.30   40.20
  -2 -14   1   23.90   22.80
   1  14  -1   54.99   27.10
   1  14  -1   -2.20   19.30
   1  14  -1   -8.40   20.80
   1  14  -1   -0.60   34.60
   1  14  -1   30.90   24.90
   1  14  -1   38.10   31.10
   1  14  -1   51.09   22.00
  -1 -14   1  -43.30   19.70
  -1 -14   1   49.00   24.00
  -1 -14   1  -15.40   37.90
   0  14  -1   60.39   30.00
   0  14  -1   14.00   39.20
   0  14  -1   84.89   31.90
   0  14  -1   68.29   27.00
   0  14  -1   91.69   33.60
   0  14  -1  133.29   37.60
   0  14  -1  103.19   34.90
   0 -14   1   94.79   29.20
   0 -14   1   89.69   48.50
   0 -14   1   54.19   23.60
  -1  14  -1   66.29   30.60
  -1  14  -1  202.18   53.59
  -1  14  -1  102.39   37.10
  -1  14  -1  113.09   33.30
  -1  14  -1  106.49   29.60
  -1  14  -1   99.29   40.60
  -1  14  -1  111.09   25.20
   1 -14   1   71.09   49.30
   1 -14   1   65.49   25.50
   1 -14   1  154.88   22.60
   1 -14   1   86.29   25.50
  -2  14  -1   -0.20   29.90
  -2  14  -1   31.00   34.10
  -2  14  -1   43.10   36.10
  -2  14  -1   57.49   33.90
  -2  14  -1   31.00   42.00
  -2  14  -1   -7.50   24.40
   2 -14   1   54.59   82.99
   2 -14   1   31.70   19.30
   2 -14   1   17.70   19.80
  -3  14  -1  -14.00   32.70
  -3  14  -1   69.19   40.70
  -3  14  -1  -12.30   31.10
  -3  14  -1   43.40   32.10
  -3  14  -1  -22.80   41.40
  -3  14  -1   -1.80   24.00
   3 -14   1  -91.59   42.40
   3 -14   1  -36.10   16.90
   3 -14   1   19.40   28.90
  -4  14  -1   -5.10   40.70
  -4  14  -1  -21.50   30.80
  -4  14  -1  -28.60   24.70
  -4  14  -1    1.00   26.60
  -4  14  -1   69.49   48.40
  -4  14  -1  -26.60   35.00
   4 -14   1   21.50   32.10
   4 -14   1   57.99   20.00
   4 -14   1   12.40   36.80
   4 -14   1  -43.00   23.30
  -5  14  -1   24.20   36.60
  -5  14  -1   65.89   37.00
  -5  14  -1   28.30   30.00
  -5  14  -1   22.70   43.70
  -5  14  -1  -14.20   31.60
   5 -14   1  -60.69   31.90
   5 -14   1  -16.20   18.80
   5 -14   1   27.10   49.40
   5 -14   1   24.80   38.50
  -6  14  -1  -12.50   28.70
  -6  14  -1   70.99   34.40
  -6  14  -1   25.70   45.10
  -6  14  -1  -34.10   31.90
  -6  14  -1  -23.30   33.70
   6 -14   1   45.90   40.10
   6 -14   1   27.90   35.40
   6 -14   1   64.99   21.00
   6 -14   1   59.29   64.09
  -7  14  -1  -59.89   42.20
  -7  14  -1   22.50   39.20
  -7  14  -1   50.29   32.70
  -7  14  -1   -6.20   39.60
   7 -14   1    0.50   40.40
   7 -14   1    4.90   37.30
   7 -14   1   44.50   63.99
  -8  14  -1  -24.80   37.10
  -8  14  -1   10.60   38.20
   8 -14   1   86.59   69.59
   8 -14   1   46.90   47.90
   8 -14   1   28.80   43.00
  10  13  -1  -20.20   24.80
 -10 -13   1  -38.30   52.39
   9  13  -1   -1.00   36.50
   9  13  -1   52.99   28.40
   9  13  -1   10.10   29.30
   9  13  -1   -9.90   30.30
  -9 -13   1  -68.39   54.49
  -9 -13   1   26.00   48.20
   8  13  -1  -30.80   26.20
   8  13  -1    0.60   33.10
   8  13  -1   -1.20   32.00
   8  13  -1    5.80   27.10
   8  13  -1   84.49   28.10
  -8 -13   1  100.59   47.30
  -8 -13   1   37.00   45.80
  -8 -13   1   98.19   65.49
   7  13  -1   15.40   27.40
   7  13  -1   60.69   26.80
   7  13  -1   11.70   36.20
   7  13  -1    2.10   26.90
   7  13  -1   48.10   30.90
  -7 -13   1  -18.10   24.10
  -7 -13   1   27.10   53.29
  -7 -13   1   -7.30   41.20
   6  13  -1  382.66   52.09
   6  13  -1  461.15   52.39
   6  13  -1  382.16   58.49
   6  13  -1  393.36   53.19
   6  13  -1  502.15   52.19
   6  13  -1  418.96   66.29
  -6 -13   1  414.76   90.39
  -6 -13   1  381.46   45.40
  -6 -13   1  381.86   60.39
   5  13  -1   31.00   26.50
   5  13  -1   93.69   28.60
   5  13  -1   79.09   39.30
   5  13  -1   56.79   28.30
   5  13  -1   65.99   26.40
   5  13  -1  -18.20   34.20
  -5 -13   1   92.09   57.79
   4  13  -1   85.39   34.40
   4  13  -1   79.29   30.00
   4  13  -1   75.19   30.30
   4  13  -1  111.19   30.40
   4  13  -1  116.99   30.30
   4  13  -1  102.59   40.60
  -4 -13   1  115.89   28.90
   3  13  -1   45.00   23.10
   3  13  -1  -95.39   45.80
   3  13  -1   -4.40   20.40
   3  13  -1   13.70   22.10
   3  13  -1   34.10   34.50
   3  13  -1    4.70   25.20
   3  13  -1   40.40   22.60
  -3 -13   1  -39.30   18.30
  -3 -13   1   23.90   36.00
   2  13  -1   46.30   22.50
   2  13  -1   28.80   25.40
   2  13  -1   41.60   22.90
   2  13  -1   21.60   17.30
   2  13  -1   70.29   48.50
   2  13  -1   72.19   35.70
   2  13  -1    7.50   18.80
   2  13  -1   45.80   25.20
  -2 -13   1   53.59   24.50
  -2 -13   1   36.80   23.60
  -2 -13   1   37.30   35.80
   1  13  -1  109.89   42.50
   1  13  -1   94.19   26.90
   1  13  -1  140.99   34.00
   1  13  -1  134.49   36.90
   1  13  -1   59.99   23.30
   1  13  -1   69.39   28.10
  -1 -13   1  111.39   26.20
  -1 -13   1  114.29   44.90
  -1 -13   1  158.88   28.50
   0  13  -1  121.09   32.50
   0  13  -1  198.68   27.90
   0  13  -1  151.78   30.30
   0  13  -1  121.49   33.90
   0  13  -1  232.98   50.49
   0  13  -1  148.49   37.10
   0 -13   1  116.89   45.90
   0 -13   1  153.08   27.10
   0 -13   1  171.98   27.60
   0 -13   1  183.38   26.50
  -1  13  -1   21.90   31.60
  -1  13  -1   26.50   18.60
  -1  13  -1   31.00   25.80
  -1  13  -1   35.50   24.40
  -1  13  -1   39.20   38.50
  -1  13  -1   19.50   26.30
   1 -13   1   55.59   21.40
   1 -13   1   48.10   29.20
   1 -13   1   32.80   17.80
   1 -13   1  -30.50   39.00
   1 -13   1   46.40   25.90
  -2  13  -1   -2.10   23.50
  -2  13  -1   10.70   29.70
  -2  13  -1  -24.20   26.80
  -2  13  -1   -5.40   21.40
  -2  13  -1   23.50   34.40
   2 -13   1   56.79   50.89
   2 -13   1  -12.40   37.60
   2 -13   1   39.50   20.40
   2 -13   1   35.10   18.40
  -3  13  -1   81.49   43.20
  -3  13  -1   82.29   39.00
  -3  13  -1  142.99   33.70
  -3  13  -1   63.89   38.00
  -3  13  -1  157.68   41.60
  -3  13  -1   78.69   29.10
   3 -13   1  253.97   61.49
   3 -13   1  116.79   32.50
   3 -13   1   78.89   20.20
  -4  13  -1   -1.50   25.00
  -4  13  -1   71.59   36.40
  -4  13  -1   37.40   35.70
  -4  13  -1   36.30   42.50
   4 -13   1   10.60   30.10
   4 -13   1   42.40   24.30
   4 -13   1   14.20   16.20
   4 -13   1  102.69   47.70
   4 -13   1   20.50   29.50
  -5  13  -1  -11.60   30.80
  -5  13  -1   31.00   35.90
  -5  13  -1   34.90   41.60
  -5  13  -1   -6.00   28.80
  -5  13  -1  -42.50   42.80
  -5  13  -1  -17.00   25.90
   5 -13   1   18.80   28.90
   5 -13   1   34.40   41.20
   5 -13   1    9.50   30.70
   5 -13   1    7.80   16.60
  -6  13  -1  118.89   41.40
  -6  13  -1  144.19   54.59
  -6  13  -1   85.09   35.40
  -6  13  -1  117.79   40.00
   6 -13   1  126.99   39.70
   6 -13   1  172.08   24.30
   6 -13   1  221.38   65.59
   6 -13   1  143.89   43.10
  -7  13  -1   15.20   35.70
  -7  13  -1  -19.80   28.60
  -7  13  -1    2.60   44.70
  -7  13  -1   -6.60   38.90
   7 -13   1  -48.70   53.39
   7 -13   1  -46.90   33.20
   7 -13   1  -35.30   18.10
   7 -13   1    8.30   23.30
  -8  13  -1    0.30   37.00
  -8  13  -1   -6.60   45.70
  -8  13  -1  -10.10   30.00
  -8  13  -1  -57.79   33.70
   8 -13   1 -110.49   36.10
   8 -13   1  -14.50   26.20
   8 -13   1   31.10   26.40
   8 -13   1   -4.70   34.70
  -9  13  -1   51.59   38.70
  -9  13  -1   22.50   42.30
  -9  13  -1  -19.10   33.80
   9 -13   1   25.30   61.59
   9 -13   1  -15.20   66.29
  10  12  -1   63.39   35.10
  10  12  -1   31.40   37.30
  10  12  -1    5.10   26.10
  10  12  -1    1.20   30.20
 -10 -12   1   33.70   45.40
 -10 -12   1 -105.49   47.90
   9  12  -1  101.39   55.79
   9  12  -1   39.70   29.70
   9  12  -1  -11.50   30.20
   9  12  -1   48.90   26.70
   9  12  -1  -28.50   29.10
   9  12  -1   12.30   27.70
  -9 -12   1   15.20   53.29
  -9 -12   1   23.10   41.80
  -9 -12   1   56.19   28.60
   8  12  -1   48.10   26.30
   8  12  -1   10.10   23.50
   8  12  -1   42.10   29.50
   8  12  -1   -9.20   29.60
   8  12  -1   29.10   33.00
   8  12  -1  -40.30   30.60
  -8 -12   1    3.70   23.20
  -8 -12   1   35.10   37.30
  -8 -12   1   -9.30   53.19
   7  12  -1  122.89   35.30
   7  12  -1  110.39   31.50
   7  12  -1   96.39   37.50
   7  12  -1   69.79   29.60
   7  12  -1  188.38   40.20
  -7 -12   1  135.19   43.20
  -7 -12   1  146.59   30.50
   6  12  -1    7.30   22.50
   6  12  -1    5.10   24.30
   6  12  -1  -28.80   21.40
   6  12  -1   21.20   24.60
   6  12  -1   45.00   31.10
   6  12  -1  -15.90   33.20
  -6 -12   1   14.70   34.80
  -6 -12   1   46.20   21.60
  -6 -12   1   49.10   50.19
   5  12  -1   12.90   28.40
   5  12  -1   -2.10   29.20
   5  12  -1   -5.50   20.90
   5  12  -1  -35.60   20.80
   5  12  -1  -29.70   20.50
   5  12  -1   43.70   40.70
  -5 -12   1  -43.00   42.90
  -5 -12   1  -39.50   18.50
  -5 -12   1   -0.80   31.70
   4  12  -1   15.30   31.40
   4  12  -1   10.40   20.70
   4  12  -1  -20.60   22.70
   4  12  -1    0.70   21.30
   4  12  -1   17.10   22.90
   4  12  -1   48.30   29.50
   4  12  -1   37.80   32.80
  -4 -12   1   -6.00   41.50
   3  12  -1   38.20   33.60
   3  12  -1    8.20   23.70
   3  12  -1   57.19   22.60
   3  12  -1   -3.80   20.20
   3  12  -1   35.40   22.90
   3  12  -1   34.70   21.00
   3  12  -1   22.60   23.00
  -3 -12   1   41.70   21.40
  -3 -12   1   38.00   32.40
  -3 -12   1   18.90   20.70
   2  12  -1  159.08   21.30
   2  12  -1  190.88   30.30
   2  12  -1  106.99   39.50
   2  12  -1  153.88   49.60
   2  12  -1  146.29   28.90
   2  12  -1  159.78   26.60
   2  12  -1  156.68   32.40
   2  12  -1  188.38   35.20
   2  12  -1  171.88   40.50
  -2 -12   1  133.69   27.80
  -2 -12   1  208.28   29.10
  -2 -12   1  203.58   43.10
   1  12  -1  389.26   45.80
   1  12  -1  387.26   56.49
   1  12  -1  329.67   42.40
   1  12  -1  243.08   40.70
   1  12  -1  398.36   42.90
   1  12  -1  392.26   55.69
   1  12  -1  246.18   54.39
   1  12  -1  331.47   37.10
  -1 -12   1  414.66   57.79
  -1 -12   1  362.06   36.10
  -1 -12   1  313.17   40.80
  -1 -12   1  352.76   37.80
  -1 -12   1  373.66   42.90
   0  12  -1   -0.10   27.30
   0  12  -1  -11.60   22.20
   0  12  -1    6.80   16.90
   0  12  -1  -30.50   29.70
   0  12  -1   -2.50   19.30
   0  12  -1    6.60   31.00
   0  12  -1    6.90   20.80
   0  12  -1  -15.20   19.90
   0 -12   1   -5.90   14.50
   0 -12   1   -1.40   19.30
   0 -12   1  -66.29   30.20
   0 -12   1    1.10   13.70
  -1  12  -1   -5.80   21.40
  -1  12  -1   -6.70   21.80
  -1  12  -1  -35.80   24.20
  -1  12  -1  -25.30   18.10
  -1  12  -1   -2.00   23.90
  -1  12  -1  -24.70   16.20
  -1  12  -1    8.60   34.90
   1 -12   1   11.50   15.60
   1 -12   1   -7.90   15.10
   1 -12   1  -53.29   31.90
   1 -12   1    0.90   19.90
   1 -12   1  -23.30   20.60
  -2  12  -1   90.99   25.20
  -2  12  -1   51.09   39.00
  -2  12  -1  100.69   30.30
  -2  12  -1   23.80   26.10
  -2  12  -1   82.49   37.30
  -2  12  -1   83.59   31.90
   2 -12   1   43.70   41.10
   2 -12   1  106.29   20.00
   2 -12   1   89.59   22.30
   2 -12   1  132.09   32.90
  -3  12  -1   22.00   27.80
  -3  12  -1    6.90   23.60
  -3  12  -1   37.40   33.70
  -3  12  -1  -18.20   30.90
  -3  12  -1   59.29   27.50
  -3  12  -1    7.70   34.90
  -3  12  -1   -7.00   27.50
   3 -12   1   83.89   28.70
   3 -12   1   34.50   27.10
   3 -12   1   22.80   47.90
   3 -12   1    6.20   20.50
  -4  12  -1    9.30   23.90
  -4  12  -1  -15.50   31.50
  -4  12  -1  -48.80   25.40
  -4  12  -1   -8.30   22.60
  -4  12  -1   46.10   34.50
  -4  12  -1   -4.10   43.60
   4 -12   1   34.30   29.80
   4 -12   1  104.79   43.00
   4 -12   1   51.29   28.90
   4 -12   1   12.30   29.90
   4 -12   1   21.10   14.70
   4 -12   1   26.40   21.70
  -5  12  -1  310.17   58.19
  -5  12  -1  318.97   58.09
   5 -12   1  478.65   94.69
   5 -12   1  325.27   31.90
   5 -12   1  313.87   46.00
   5 -12   1  326.57   53.89
   5 -12   1  277.47   52.69
  -6  12  -1  106.39   43.90
  -6  12  -1   78.89   32.50
  -6  12  -1   11.00   32.10
  -6  12  -1   67.99   38.30
   6 -12   1    4.10   34.30
   6 -12   1   56.39   48.20
   6 -12   1  108.89   19.70
  -7  12  -1  150.18   42.50
  -7  12  -1   40.70   32.90
  -7  12  -1   45.00   45.70
  -7  12  -1   19.80   33.40
  -7  12  -1    2.00   34.40
   7 -12   1   25.60   53.99
   7 -12   1   15.90   44.20
   7 -12   1   83.19   38.00
   7 -12   1   58.59   20.00
   7 -12   1   56.19   34.80
  -8  12  -1  214.08   51.19
  -8  12  -1  198.58   45.70
  -8  12  -1  238.88   68.19
  -8  12  -1  234.18   65.59
  -8  12  -1  223.48   52.29
   8 -12   1  262.47   69.39
   8 -12   1  286.47   53.59
   8 -12   1  181.48   28.30
   8 -12   1  233.98   64.89
  -9  12  -1   26.10   31.50
  -9  12  -1  -11.30   33.30
  -9  12  -1  -23.50   45.80
  -9  12  -1   66.59   43.00
  -9  12  -1  -12.30   35.70
   9 -12   1   73.69   57.09
   9 -12   1  -36.40   31.80
   9 -12   1   15.90   24.50
 -10  12  -1   13.20   37.80
 -10  12  -1   49.99   41.60
  10 -12   1   22.90   47.90
  10 -12   1  -22.80   46.00
  10 -12   1  122.49   64.09
  11  11  -1   94.19   36.10
  11  11  -1   43.40   48.20
  11  11  -1   35.10   35.40
 -11 -11   1  -73.39   47.50
 -11 -11   1  -24.00   48.70
  10  11  -1   90.49   35.70
  10  11  -1   52.99   28.30
  10  11  -1   47.00   34.70
  10  11  -1  114.29   39.60
  10  11  -1   22.10   34.00
 -10 -11   1    4.80   41.40
 -10 -11   1  -48.90   49.20
 -10 -11   1  -34.10   26.20
   9  11  -1   11.00   27.00
   9  11  -1   42.20   24.50
   9  11  -1  -15.20   25.70
   9  11  -1   -9.50   31.40
   9  11  -1  -34.80   31.50
  -9 -11   1   29.50   25.20
  -9 -11   1   25.00   37.80
  -9 -11   1    9.00   49.99
   8  11  -1  105.79   32.90
   8  11  -1   79.49   32.60
   8  11  -1   73.19   27.40
   8  11  -1   64.19   34.80
   8  11  -1  123.59   34.60
   8  11  -1  161.88   49.90
  -8 -11   1   23.80   25.40
  -8 -11   1  110.99   39.80
   7  11  -1  -23.80   19.50
   7  11  -1   10.30   24.80
   7  11  -1  -29.00   34.60
   7  11  -1   37.20   30.50
  -7 -11   1   56.29   33.30
  -7 -11   1   43.50   47.30
   6  11  -1   32.90   25.00
   6  11  -1  -52.49   25.70
   6  11  -1    7.30   27.40
   6  11  -1   11.40   28.10
   6  11  -1   -3.20   22.40
  -6 -11   1    5.10   46.00
  -6 -11   1    7.00   18.50
  -6 -11   1  -12.20   29.80
   5  11  -1  -44.30   25.40
   5  11  -1  -19.60   19.40
   5  11  -1  -73.79   30.00
   5  11  -1  -36.80   18.60
   5  11  -1    0.30   20.30
   5  11  -1    1.90   27.70
   5  11  -1   -4.70   21.70
   5  11  -1  -16.00   19.70
  -5 -11   1    8.40   17.00
  -5 -11   1   -7.00   38.50
  -5 -11   1    1.30   29.40
   4  11  -1    4.80   17.30
   4  11  -1   36.60   22.90
   4  11  -1   34.50   24.20
   4  11  -1  123.69   35.70
   4  11  -1   10.00   25.60
  -4 -11   1   63.59   31.00
  -4 -11   1   -3.80   17.10
  -4 -11   1   68.19   44.90
   3  11  -1   51.99   21.10
   3  11  -1   41.20   23.00
   3  11  -1  123.59   26.50
   3  11  -1   56.99   31.00
   3  11  -1   56.89   23.40
   3  11  -1   71.59   21.20
   3  11  -1  130.49   28.40
   3  11  -1    7.00   36.60
  -3 -11   1   75.49   43.20
  -3 -11   1   74.49   22.70
   2  11  -1   70.89   22.30
   2  11  -1    4.10   17.30
   2  11  -1   11.20   22.10
   2  11  -1   87.99   33.30
   2  11  -1  101.49   24.90
   2  11  -1   37.70   22.90
   2  11  -1   60.89   20.40
   2  11  -1   48.90   13.80
  -2 -11   1   78.39   14.30
  -2 -11   1   87.79   23.00
  -2 -11   1   16.40   17.30
  -2 -11   1   29.20   30.80
  -2 -11   1   35.10   22.90
   1  11  -1   12.60   14.90
   1  11  -1  -19.10   15.00
   1  11  -1   24.70   36.80
   1  11  -1   39.00   28.40
   1  11  -1   -5.70   36.80
   1  11  -1  -10.00   16.30
   1  11  -1   21.60   20.00
   1  11  -1   23.40   20.80
  -1 -11   1   40.70   28.60
  -1 -11   1   35.00   31.60
  -1 -11   1    5.70   18.20
  -1 -11   1    6.00   14.30
   0  11  -1   29.40   20.50
   0  11  -1    7.80   21.50
   0  11  -1   34.70   17.40
   0  11  -1   20.00   19.90
   0  11  -1    3.30   27.00
   0  11  -1   28.50   24.50
   0  11  -1   54.59   33.10
   0  11  -1   -7.60   29.70
   0 -11   1   61.89   36.70
   0 -11   1   18.20   20.70
   0 -11   1   63.49   15.90
   0 -11   1   33.90   16.30
  -1  11  -1   70.59   27.90
  -1  11  -1   90.99   36.50
  -1  11  -1   32.10   21.40
  -1  11  -1   67.39   18.30
  -1  11  -1  128.19   26.80
  -1  11  -1   15.10   32.10
  -1  11  -1  114.39   34.50
   1 -11   1   66.59   25.30
   1 -11   1   78.29   18.30
   1 -11   1   65.39   36.70
   1 -11   1   93.39   26.70
   1 -11   1   56.49   17.40
  -2  11  -1  258.27   49.70
  -2  11  -1  286.67   47.70
  -2  11  -1  289.57   51.29
  -2  11  -1  279.17   43.20
  -2  11  -1  308.47   39.30
  -2  11  -1  256.27   38.10
  -2  11  -1  230.88   37.70
   2 -11   1  284.77   39.60
   2 -11   1  294.77   53.69
   2 -11   1  235.68   36.90
   2 -11   1  292.77   28.10
   2 -11   1  306.77   33.90
  -3  11  -1   33.20   24.00
  -3  11  -1   36.60   29.50
  -3  11  -1   22.20   27.50
  -3  11  -1   39.50   36.10
  -3  11  -1   16.60   28.10
  -3  11  -1   32.80   22.60
  -3  11  -1   50.89   25.80
   3 -11   1   14.90   18.80
   3 -11   1   26.60   27.50
   3 -11   1   47.30   14.60
   3 -11   1   62.99   38.30
   3 -11   1   76.39   27.50
   3 -11   1   -3.80   25.30
  -4  11  -1  499.15   56.49
  -4  11  -1  470.75   69.99
  -4  11  -1  483.75   61.69
  -4  11  -1  484.85   62.29
   4 -11   1  664.73   66.09
   4 -11   1  631.34   82.49
   4 -11   1  472.95   50.69
   4 -11   1  477.55   54.59
   4 -11   1  670.33   79.99
   4 -11   1  533.85   38.90
  -5  11  -1  100.89   42.40
  -5  11  -1   40.20   32.10
  -5  11  -1   41.00   30.20
  -5  11  -1   25.50   32.20
   5 -11   1   39.70   31.30
   5 -11   1    5.60   20.00
   5 -11   1   53.29   16.00
   5 -11   1   21.70   16.80
   5 -11   1   27.50   29.60
   5 -11   1   36.80   33.20
   5 -11   1   72.99   38.90
  -6  11  -1   23.00   26.60
  -6  11  -1   42.20   34.30
  -6  11  -1   15.00   31.40
  -6  11  -1    8.50   27.20
  -6  11  -1   62.79   60.29
  -6  11  -1    8.80   36.30
   6 -11   1    1.40   29.60
   6 -11   1   31.60   30.00
   6 -11   1   -3.90   39.40
   6 -11   1   21.70   15.60
   6 -11   1   23.50   41.60
  -7  11  -1  169.78   53.19
  -7  11  -1  247.08   50.79
  -7  11  -1  209.98   42.60
  -7  11  -1  100.49   35.40
   7 -11   1  160.38   62.19
   7 -11   1  176.08   49.20
   7 -11   1  133.39   23.30
   7 -11   1  173.68   42.70
   7 -11   1  193.98   45.00
  -8  11  -1  130.39   41.20
  -8  11  -1  205.78   46.90
  -8  11  -1  222.38   47.60
  -8  11  -1  189.88   45.70
  -8  11  -1  170.18   59.19
   8 -11   1  168.48   54.59
   8 -11   1  151.38   42.30
   8 -11   1  188.48   27.20
   8 -11   1   65.79   57.39
   8 -11   1  177.38   56.49
  -9  11  -1   76.39   33.70
  -9  11  -1   24.10   46.90
  -9  11  -1   38.10   34.60
  -9  11  -1   20.40   35.10
  -9  11  -1   27.40   32.10
   9 -11   1   -0.90   22.30
   9 -11   1   -4.20   41.90
   9 -11   1   24.70   36.80
   9 -11   1  -41.70   59.49
   9 -11   1  -17.10   23.90
   9 -11   1   -9.70   73.39
 -10  11  -1   45.50   38.60
 -10  11  -1   -7.40   30.60
 -10  11  -1   50.49   41.50
 -10  11  -1  145.29   52.79
  10 -11   1  -11.80   57.49
  10 -11   1   13.30   44.10
  10 -11   1   19.40   45.70
  10 -11   1   35.70   31.20
  10 -11   1  -12.90   41.50
 -11  11  -1   16.80   45.70
 -11  11  -1  -11.00   22.60
 -11  11  -1  -27.60   34.60
 -11  11  -1   65.99   44.50
  11 -11   1   56.09   29.80
  11 -11   1 -122.49   55.09
  11 -11   1   37.50   43.00
  11 -11   1   15.70   40.60
  12  10  -1   12.10   32.60
  12  10  -1   33.60   34.90
  12  10  -1   13.00   28.80
  12  10  -1  117.59   63.39
 -12 -10   1   85.19   61.99
 -12 -10   1 -107.99   49.00
  11  10  -1  -13.90   31.80
  11  10  -1   48.50   46.80
  11  10  -1   17.90   33.20
  11  10  -1   -1.50   31.30
  11  10  -1  -60.29   22.50
 -11 -10   1   19.60   53.39
 -11 -10   1  -34.00   33.50
 -11 -10   1   42.10   44.10
  10  10  -1  114.89   36.90
  10  10  -1   -0.90   27.00
  10  10  -1   31.60   29.50
  10  10  -1   58.59   35.40
  10  10  -1   35.60   30.70
 -10 -10   1   -8.10   39.00
 -10 -10   1   43.30   27.80
 -10 -10   1  -67.99   45.70
   9  10  -1   48.50   26.60
   9  10  -1   67.89   31.40
   9  10  -1  129.79   37.00
   9  10  -1  107.19   33.00
   9  10  -1  153.78   31.40
   9  10  -1   66.69   34.10
  -9 -10   1   83.99   29.50
  -9 -10   1   11.00   34.40
   8  10  -1   45.40   28.40
   8  10  -1    9.80   20.40
   8  10  -1   -1.30   19.10
   8  10  -1  -59.49   44.40
   8  10  -1   16.30   25.80
   8  10  -1  -17.70   22.80
  -8 -10   1   33.10   31.10
  -8 -10   1   26.10   42.00
  -8 -10   1   28.80   20.80
   7  10  -1  188.68   36.10
   7  10  -1  134.39   30.30
   7  10  -1  118.59   36.00
  -7 -10   1  141.69   52.49
  -7 -10   1  129.79   37.20
  -7 -10   1  162.88   28.20
   6  10  -1  269.17   37.20
   6  10  -1  179.38   37.80
   6  10  -1  257.87   36.30
   6  10  -1  221.78   32.80
   6  10  -1  207.48   36.40
   6  10  -1  250.87   53.59
   6  10  -1  240.58   36.20
  -6 -10   1  202.68   40.80
  -6 -10   1  206.58   30.80
  -6 -10   1  266.87   61.09
   5  10  -1  154.78   28.10
   5  10  -1   90.19   25.30
   5  10  -1  147.69   29.10
   5  10  -1  102.19   27.00
   5  10  -1   36.50   27.30
   5  10  -1  111.79   41.70
   5  10  -1  121.59   32.00
   5  10  -1  131.19   27.00
  -5 -10   1   76.69   31.50
  -5 -10   1   83.09   41.90
  -5 -10   1  117.19   22.80
   4  10  -1  226.38   30.50
   4  10  -1  200.28   31.10
   4  10  -1  218.78   42.80
   4  10  -1  212.98   32.40
   4  10  -1  202.38   32.30
   4  10  -1  202.98   35.00
   4  10  -1  200.78   38.90
   4  10  -1  242.28   34.00
  -4 -10   1  242.18   54.49
  -4 -10   1  173.68   38.00
  -4 -10   1  311.37   40.00
  -4 -10   1  286.17   35.60
  -4 -10   1  164.38   26.40
   3  10  -1    6.70   17.30
   3  10  -1    1.20   14.80
   3  10  -1  -15.70   18.60
   3  10  -1  -50.39   25.00
   3  10  -1   16.10   17.30
   3  10  -1   18.10   20.60
   3  10  -1   31.90   19.10
   3  10  -1   29.60   26.30
  -3 -10   1   26.60   15.60
  -3 -10   1   22.40   10.90
  -3 -10   1    6.30   19.70
  -3 -10   1   49.10   27.50
  -3 -10   1  -49.50   30.80
   2  10  -1    7.50   10.70
   2  10  -1   -5.30   15.80
   2  10  -1   24.90   20.10
   2  10  -1   15.10   18.80
   2  10  -1  -20.50   24.00
   2  10  -1   11.80   18.10
   2  10  -1   13.90   15.90
   2  10  -1  -46.40   21.00
   2  10  -1   15.20   16.70
  -2 -10   1   -1.50   10.20
  -2 -10   1   22.70   18.50
  -2 -10   1   18.40   20.10
  -2 -10   1   32.80   17.50
  -2 -10   1    7.90   14.90
   1  10  -1   27.60   19.50
   1  10  -1   26.80   16.00
   1  10  -1   35.00   20.20
   1  10  -1   42.70   30.10
   1  10  -1   58.19   24.20
   1  10  -1   29.70   25.30
   1  10  -1   24.10   16.70
  -1 -10   1  -13.10   24.90
  -1 -10   1   19.10   18.90
  -1 -10   1   41.10   22.20
  -1 -10   1   40.20   16.00
  -1 -10   1   22.30   15.70
   0  10  -1   51.69   30.30
   0  10  -1    4.30   16.40
   0  10  -1   18.40   20.10
   0  10  -1   54.49   30.20
   0  10  -1   35.20   15.20
   0  10  -1   43.40   19.40
   0  10  -1   69.89   19.60
   0 -10   1   16.10   19.60
   0 -10   1  -15.70   29.80
   0 -10   1   22.60   13.30
   0 -10   1   28.30   24.60
   0 -10   1   27.60   22.10
   0 -10   1   26.10   17.30
  -1  10  -1  218.48   34.40
  -1  10  -1  243.48   31.90
  -1  10  -1  293.07   38.10
  -1  10  -1  256.77   43.60
  -1  10  -1  171.88   41.40
  -1  10  -1  278.57   28.50
  -1  10  -1  314.47   35.80
   1 -10   1  283.37   27.10
   1 -10   1  186.48   37.20
   1 -10   1  367.56   38.80
   1 -10   1  273.77   47.80
   1 -10   1  237.88   35.00
   1 -10   1  285.27   30.00
   1 -10   1  261.17   34.80
   1 -10   1  275.67   37.10
  -2  10  -1  398.36   44.70
  -2  10  -1  451.25   57.89
  -2  10  -1  471.55   50.79
  -2  10  -1  375.26   51.89
  -2  10  -1  294.27   50.69
  -2  10  -1  354.56   53.09
  -2  10  -1  402.56   41.30
   2 -10   1  490.95   61.69
   2 -10   1  428.86   55.89
   2 -10   1  464.95   33.20
   2 -10   1  437.26   46.50
   2 -10   1  390.06   43.50
   2 -10   1  423.06   47.90
   2 -10   1  389.96   37.40
   2 -10   1  323.17   48.60
  -3  10  -1   49.10   22.40
  -3  10  -1   54.29   29.30
  -3  10  -1   20.70   29.50
  -3  10  -1   65.49   29.80
  -3  10  -1   42.40   22.80
  -3  10  -1   -3.70   25.70
   3 -10   1   65.19   14.20
   3 -10   1   80.39   26.20
   3 -10   1   24.40   21.40
   3 -10   1   36.60   17.40
   3 -10   1   -1.30   30.10
   3 -10   1   26.40   25.00
  -4  10  -1  431.36   54.89
  -4  10  -1  418.96   52.09
  -4  10  -1  419.86   61.79
  -4  10  -1  430.86   49.20
  -4  10  -1  504.85   51.39
   4 -10   1  310.97   50.49
   4 -10   1  454.15   33.70
   4 -10   1  401.66   56.79
   4 -10   1  462.55   47.90
   4 -10   1  414.66   50.69
   4 -10   1  496.95   80.49
  -5  10  -1   18.10   25.20
  -5  10  -1   60.49   31.80
  -5  10  -1  -51.49   22.50
  -5  10  -1   67.39   31.50
  -5  10  -1    9.20   35.20
  -5  10  -1   12.90   25.30
   5 -10   1  -14.90   20.00
   5 -10   1   -3.70   35.90
   5 -10   1   -7.50   21.00
   5 -10   1    6.10   28.20
   5 -10   1    4.70   23.70
   5 -10   1    7.90   28.10
  -6  10  -1  381.66   62.49
  -6  10  -1  280.57   52.09
  -6  10  -1  278.87   43.40
  -6  10  -1  318.37   49.80
  -6  10  -1  369.36   46.80
  -6  10  -1  380.76   53.19
   6 -10   1  368.56   55.99
   6 -10   1  322.57   52.89
   6 -10   1  396.16   73.69
   6 -10   1  304.57   31.00
   6 -10   1  280.37   44.20
  -7  10  -1  165.78   41.50
  -7  10  -1  135.39   40.10
  -7  10  -1  142.99   53.09
  -7  10  -1  175.08   35.00
   7 -10   1  171.38   23.90
   7 -10   1  180.88   40.60
   7 -10   1  134.59   55.69
   7 -10   1   91.59   48.30
   7 -10   1  171.08   44.80
  -8  10  -1   50.09   34.00
  -8  10  -1  -15.80   26.20
  -8  10  -1   -1.70   26.40
  -8  10  -1   89.09   48.00
  -8  10  -1   27.30   33.70
   8 -10   1  -15.70   43.70
   8 -10   1   74.19   34.90
   8 -10   1   -0.10   16.50
   8 -10   1   32.90   37.00
   8 -10   1   26.30   34.50
  -9  10  -1   56.59   41.30
  -9  10  -1   41.40   28.70
  -9  10  -1   28.70   44.20
  -9  10  -1  -49.50   24.90
   9 -10   1   42.70   41.40
   9 -10   1   -8.60   20.20
   9 -10   1   -6.90   20.90
   9 -10   1    7.40   37.30
   9 -10   1    1.00   45.40
   9 -10   1  -77.09   55.59
 -10  10  -1   31.70   23.40
 -10  10  -1   39.10   35.50
 -10  10  -1  -30.90   43.20
 -10  10  -1   60.99   37.40
 -10  10  -1   43.30   37.70
  10 -10   1    3.90   26.10
  10 -10   1   46.80   42.00
  10 -10   1  138.89   58.99
  10 -10   1   -5.40   44.00
  10 -10   1   46.90   41.40
  10 -10   1   36.00   32.30
 -11  10  -1  -18.20   22.10
 -11  10  -1   -5.80   31.50
 -11  10  -1   21.40   39.80
 -11  10  -1  -91.09   40.20
 -11  10  -1  -18.00   34.40
  11 -10   1   53.49   30.80
  11 -10   1  -17.20   37.40
  11 -10   1   93.59   59.89
  11 -10   1   29.50   53.09
  11 -10   1   -7.00   36.20
 -12  10  -1  -33.10   38.70
 -12  10  -1  -69.39   62.19
 -12  10  -1    9.60   39.40
 -12  10  -1  -12.90   34.70
  12 -10   1   20.40   69.79
  12 -10   1   31.80   33.40
  12 -10   1   30.80   62.09
  12   9  -1   26.50   33.90
  12   9  -1   67.69   35.00
  12   9  -1  -31.00   35.00
 -12  -9   1   36.00   43.30
 -12  -9   1  -41.70   50.39
  11   9  -1  105.39   31.40
  11   9  -1   38.10   30.10
  11   9  -1   22.90   32.30
  11   9  -1   70.19   43.90
  11   9  -1   18.90   34.60
  11   9  -1   49.60   35.80
 -11  -9   1    3.90   61.09
 -11  -9   1   55.29   55.69
 -11  -9   1    7.40   38.60
  10   9  -1  -14.20   25.20
  10   9  -1   48.80   33.80
  10   9  -1   15.50   25.40
  10   9  -1  -44.70   27.10
  10   9  -1   13.10   27.50
 -10  -9   1    6.20   45.60
 -10  -9   1   -7.00   31.00
 -10  -9   1   53.29   28.30
   9   9  -1   -3.50   22.80
   9   9  -1   15.50   26.40
   9   9  -1  -11.80   29.80
   9   9  -1   49.70   26.40
   9   9  -1   49.10   30.90
   9   9  -1   23.00   22.80
  -9  -9   1   39.90   21.40
  -9  -9   1  -59.49   38.50
  -9  -9   1   -1.10   31.60
   8   9  -1   33.30   22.50
   8   9  -1  -25.50   24.40
   8   9  -1   -0.30   25.60
   8   9  -1   -1.90   22.00
   8   9  -1    0.40   25.30
  -8  -9   1   -2.50   28.70
  -8  -9   1   -3.50   41.10
  -8  -9   1   38.00   19.70
   7   9  -1  135.69   28.60
   7   9  -1  147.79   39.80
   7   9  -1  166.18   30.40
   7   9  -1  130.29   33.90
   7   9  -1   60.89   27.00
   7   9  -1  140.49   31.60
  -7  -9   1   97.49   27.10
  -7  -9   1  117.29   48.70
  -7  -9   1  183.78   28.30
  -7  -9   1  164.08   35.70
   6   9  -1  455.25   46.30
   6   9  -1  407.76   42.50
   6   9  -1  428.06   43.50
   6   9  -1  487.85   47.80
   6   9  -1  451.95   49.00
   6   9  -1  429.06   51.79
   6   9  -1  347.97   53.89
   6   9  -1  422.46   61.69
  -6  -9   1  418.16   39.60
  -6  -9   1  419.06   68.19
  -6  -9   1  419.76   37.50
  -6  -9   1  399.26   51.69
   5   9  -1  -53.19   23.60
   5   9  -1   -0.30   22.70
   5   9  -1    6.40   15.80
   5   9  -1   26.90   17.70
   5   9  -1  -16.60   16.90
   5   9  -1   22.20   26.20
   5   9  -1  -14.00   13.90
   5   9  -1   11.50   17.60
   5   9  -1   13.60   25.80
  -5  -9   1   -3.60   14.90
  -5  -9   1   -4.70   14.30
  -5  -9   1   13.60   16.90
  -5  -9   1   -4.90   11.30
  -5  -9   1  -12.80   18.80
  -5  -9   1  -38.60   19.40
   4   9  -1   21.40   19.60
   4   9  -1   35.10   19.30
   4   9  -1   -2.40   19.20
   4   9  -1    2.60   14.30
   4   9  -1   10.20   15.60
   4   9  -1   13.40   25.80
   4   9  -1    2.80   23.00
   4   9  -1  -18.40   23.10
  -4  -9   1  -10.50   18.90
  -4  -9   1   28.60   14.70
  -4  -9   1   -5.00   15.00
  -4  -9   1  -21.90   29.60
  -4  -9   1  -11.40   14.20
  -4  -9   1  -49.10   19.20
  -4  -9   1   -0.50   12.70
  -4  -9   1    1.40    9.90
   3   9  -1  123.49   33.30
   3   9  -1   75.69   23.70
   3   9  -1  118.69   22.80
   3   9  -1  128.59   23.70
   3   9  -1  145.79   24.70
   3   9  -1  125.79   33.80
   3   9  -1  124.59   32.40
   3   9  -1  134.29   25.60
   3   9  -1  109.69   27.30
  -3  -9   1  148.59   18.20
  -3  -9   1   86.49   40.00
  -3  -9   1  126.39   21.00
  -3  -9   1  101.19   37.00
  -3  -9   1   92.79   20.00
  -3  -9   1  159.78   22.00
  -3  -9   1   95.39   30.50
  -3  -9   1  103.39   21.00
   2   9  -1   63.49   20.40
   2   9  -1   70.59   19.90
   2   9  -1   45.60   27.60
   2   9  -1   93.49   30.80
   2   9  -1  116.09   31.10
   2   9  -1   71.69   23.20
   2   9  -1   50.29   20.00
   2   9  -1   73.79   13.00
   2   9  -1   77.79   22.20
   2   9  -1   97.79   27.30
  -2  -9   1   62.59   17.60
  -2  -9   1   67.19   24.70
  -2  -9   1   94.39   41.10
  -2  -9   1   64.09   13.60
  -2  -9   1   79.09   17.80
  -2  -9   1   58.09   19.40
   1   9  -1   36.00   17.20
   1   9  -1  -16.50   22.20
   1   9  -1   30.30   24.40
   1   9  -1   51.29   17.90
   1   9  -1   37.30   15.60
   1   9  -1    2.30   24.50
   1   9  -1   76.09   28.80
   1   9  -1   16.80   20.20
   1   9  -1   24.60   13.90
  -1  -9   1   24.30   19.90
  -1  -9   1   11.10   13.10
  -1  -9   1   46.80   20.20
  -1  -9   1    8.80   24.50
  -1  -9   1   17.00   14.90
   0   9  -1  193.98   23.80
   0   9  -1  124.39   32.10
   0   9  -1  170.98   26.70
   0   9  -1  219.48   41.40
   0   9  -1  181.28   24.30
   0   9  -1  163.28   33.10
   0   9  -1  221.38   34.80
   0   9  -1  188.98   27.40
   0   9  -1  162.98   36.30
   0  -9   1  162.18   35.10
   0  -9   1  215.08   23.70
   0  -9   1  188.18   27.30
   0  -9   1  166.88   27.30
   0  -9   1  206.88   36.50
   0  -9   1  258.97   24.30
   0  -9   1  191.98   28.80
  -1   9  -1   16.20   15.30
  -1   9  -1   -2.90   23.70
  -1   9  -1   -0.10   11.10
  -1   9  -1   -3.70   22.30
  -1   9  -1   -5.10   14.40
  -1   9  -1   -6.20   22.60
  -1   9  -1   -2.20   23.50
  -1   9  -1    2.40   18.10
   1  -9   1   -3.90   11.90
   1  -9   1   -0.80   10.70
   1  -9   1   34.60   27.70
   1  -9   1   -8.30   16.60
   1  -9   1   -6.10   14.20
   1  -9   1   -7.70   14.80
   1  -9   1    5.50   19.60
  -2   9  -1   14.20   23.20
  -2   9  -1   22.10   17.00
  -2   9  -1   21.50   18.20
  -2   9  -1    9.80   22.30
  -2   9  -1    3.40   16.30
  -2   9  -1    5.10   26.30
   2  -9   1   19.40   20.20
   2  -9   1   33.80   26.60
   2  -9   1    0.10   28.70
   2  -9   1   52.19   13.00
   2  -9   1   16.10   18.30
   2  -9   1   70.19   23.90
   2  -9   1    2.40   17.10
   2  -9   1   23.70   14.80
  -3   9  -1  365.96   50.69
  -3   9  -1  352.86   45.90
  -3   9  -1  439.76   42.80
  -3   9  -1  384.76   43.90
  -3   9  -1  499.15   57.39
  -3   9  -1  368.86   68.59
   3  -9   1  384.06   42.40
   3  -9   1  369.96   43.50
   3  -9   1  394.46   31.90
   3  -9   1  394.86   30.30
   3  -9   1  475.85   40.40
   3  -9   1  396.96   44.50
   3  -9   1  489.25   58.99
   3  -9   1  357.76   50.29
  -4   9  -1   40.70   21.30
  -4   9  -1   12.80   23.40
  -4   9  -1    8.40   28.10
  -4   9  -1   36.40   27.20
  -4   9  -1   36.80   21.20
  -4   9  -1   41.30   30.20
  -4   9  -1   22.20   22.60
  -4   9  -1   57.09   23.30
   4  -9   1   54.49   13.30
   4  -9   1   22.30   32.80
   4  -9   1   35.00   23.50
   4  -9   1   64.29   29.70
   4  -9   1   35.00   19.70
   4  -9   1   69.89   33.30
   4  -9   1   35.10   22.60
  -5   9  -1  342.77   52.79
  -5   9  -1  253.77   43.10
  -5   9  -1  249.58   37.40
  -5   9  -1  282.07   38.90
  -5   9  -1  276.77   45.50
  -5   9  -1  330.97   43.70
  -5   9  -1  307.47   53.09
   5  -9   1  244.78   38.10
   5  -9   1  255.47   45.20
   5  -9   1  310.67   55.09
   5  -9   1  298.07   27.30
   5  -9   1  335.97   45.20
   5  -9   1  264.17   49.80
   5  -9   1  287.67   38.20
  -6   9  -1  104.99   33.30
  -6   9  -1   38.10   36.20
  -6   9  -1   55.99   27.40
  -6   9  -1   97.99   30.40
  -6   9  -1  142.99   48.90
  -6   9  -1  142.59   34.90
   6  -9   1  104.19   48.40
   6  -9   1   54.39   31.60
   6  -9   1   26.10   23.70
   6  -9   1   58.49   28.60
   6  -9   1   83.89   33.90
  -7   9  -1   67.09   42.70
  -7   9  -1   10.90   27.80
  -7   9  -1    6.80   24.30
  -7   9  -1  -19.30   21.50
  -7   9  -1   22.50   36.40
  -7   9  -1   15.30   31.10
   7  -9   1    1.30   29.10
   7  -9   1   16.90   15.00
   7  -9   1  -45.70   35.00
   7  -9   1   18.80   28.20
   7  -9   1   11.90   30.30
  -8   9  -1  -16.20   22.60
  -8   9  -1   13.00   31.80
  -8   9  -1   18.50   30.20
  -8   9  -1  -25.10   54.69
   8  -9   1   15.10   30.70
   8  -9   1  -45.30   25.40
   8  -9   1  -16.20   38.10
   8  -9   1   -8.80   15.90
  -9   9  -1   76.49   31.00
  -9   9  -1   53.09   32.60
  -9   9  -1    4.70   42.40
  -9   9  -1   -5.40   29.20
  -9   9  -1   37.80   33.30
   9  -9   1   49.50   46.80
   9  -9   1   41.60   35.30
   9  -9   1   10.70   21.10
   9  -9   1   -7.90   20.50
   9  -9   1  121.79   46.20
   9  -9   1   16.10   35.80
 -10   9  -1    0.90   29.90
 -10   9  -1  -18.20   30.20
 -10   9  -1   -9.30   43.50
 -10   9  -1   -5.00   18.90
  10  -9   1  -55.99   23.70
  10  -9   1   56.79   36.40
  10  -9   1   29.90   49.70
  10  -9   1  -42.60   44.30
  10  -9   1   -1.30   20.90
  10  -9   1   -6.10   39.10
 -11   9  -1  110.69   43.90
 -11   9  -1   26.50   35.10
 -11   9  -1   86.89   44.70
 -11   9  -1   -3.40   32.40
 -11   9  -1   96.39   27.30
  11  -9   1   10.90   37.30
  11  -9   1   72.29   44.20
  11  -9   1   73.09   36.30
  11  -9   1  -30.60   52.39
  11  -9   1  104.39   59.19
 -12   9  -1   -0.20   48.10
 -12   9  -1  137.69   49.90
 -12   9  -1  -19.80   36.70
 -12   9  -1   40.30   54.79
 -12   9  -1    7.90   25.10
  12  -9   1   -3.00   38.40
  12  -9   1   92.09   82.79
  12  -9   1  -33.70   51.09
  12  -9   1   11.90   37.90
  13   8  -1   24.40   36.60
  13   8  -1   54.09   44.20
  13   8  -1   64.19   32.40
 -13  -8   1  -67.29   44.60
 -13  -8   1   45.30   49.00
  12   8  -1   17.00   30.50
  12   8  -1   22.00   26.40
  12   8  -1  -14.10   30.10
  12   8  -1   12.70   30.40
 -12  -8   1   88.99   46.00
 -12  -8   1   14.50   30.20
 -12  -8   1  157.18   57.59
  11   8  -1   -7.40   27.90
  11   8  -1   26.70   32.20
  11   8  -1   43.80   27.80
  11   8  -1   18.20   30.40
  11   8  -1  -31.60   38.80
  11   8  -1  -11.30   28.60
 -11  -8   1   76.79   33.10
 -11  -8   1  -14.00   42.40
 -11  -8   1  110.59   55.69
  10   8  -1    8.70   29.60
  10   8  -1   -4.30   24.70
  10   8  -1   29.40   23.80
  10   8  -1   32.00   32.40
  10   8  -1   21.90   25.40
  10   8  -1   26.50   27.80
 -10  -8   1   -6.60   31.80
 -10  -8   1  -23.00   32.20
 -10  -8   1   16.90   32.10
   9   8  -1  151.18   35.30
   9   8  -1  162.78   38.20
   9   8  -1  138.79   31.70
   9   8  -1  150.98   32.20
   9   8  -1  108.39   33.50
   9   8  -1  168.88   41.00
  -9  -8   1  142.79   55.19
  -9  -8   1  193.18   36.80
  -9  -8   1  122.59   32.80
  -9  -8   1  170.08   39.00
   8   8  -1  836.02   66.09
   8   8  -1  740.23   67.49
   8   8  -1  868.51   68.29
   8   8  -1  783.62   69.89
   8   8  -1  768.42   68.19
   8   8  -1  908.91   65.79
  -8  -8   1  890.51   72.19
  -8  -8   1  794.52   97.99
  -8  -8   1  669.53   66.79
  -8  -8   1  826.62   70.19
   7   8  -1  225.38   32.50
   7   8  -1  205.28   37.50
   7   8  -1  173.98   53.39
   7   8  -1  155.28   37.20
   7   8  -1  228.48   35.50
   7   8  -1  156.98   41.50
   7   8  -1  179.68   30.00
  -7  -8   1  120.29   48.00
  -7  -8   1  172.08   33.80
  -7  -8   1  144.99   33.30
   6   8  -1  172.38   35.50
   6   8  -1  190.38   33.60
   6   8  -1  215.68   32.00
   6   8  -1  140.39   26.60
   6   8  -1  240.28   33.10
   6   8  -1  161.88   29.00
   6   8  -1  178.68   39.50
   6   8  -1  178.78   28.20
  -6  -8   1  154.18   28.60
  -6  -8   1  157.58   32.20
  -6  -8   1  194.28   27.30
  -6  -8   1  129.89   29.60
  -6  -8   1  195.68   47.90
   5   8  -1   94.59   22.60
   5   8  -1  115.19   23.90
   5   8  -1  115.29   31.80
   5   8  -1  128.79   25.10
   5   8  -1   92.59   35.30
   5   8  -1  116.79   33.20
   5   8  -1  159.48   24.30
  -5  -8   1  126.79   24.30
  -5  -8   1   62.99   36.70
  -5  -8   1  157.38   30.10
  -5  -8   1  108.79   25.30
  -5  -8   1  115.09   24.20
  -5  -8   1  115.39   21.00
  -5  -8   1   85.99   18.30
  -5  -8   1   74.09   16.00
   4   8  -1  198.58   33.00
   4   8  -1  215.08   40.70
   4   8  -1  160.48   25.70
   4   8  -1  172.48   35.80
   4   8  -1  134.99   34.70
   4   8  -1  135.39   27.60
   4   8  -1  157.58   24.30
   4   8  -1  150.28   26.10
   4   8  -1  144.99   34.80
   4   8  -1  172.78   24.60
   4   8  -1  160.98   44.90
  -4  -8   1  210.68   52.89
  -4  -8   1  148.19   23.80
  -4  -8   1  220.48   33.40
  -4  -8   1  166.48   24.00
  -4  -8   1  130.39   21.10
  -4  -8   1  118.09   17.10
  -4  -8   1  124.69   24.20
  -4  -8   1  149.88   26.40
   3   8  -1   -5.30   17.30
   3   8  -1  -38.10   18.50
   3   8  -1    9.00   14.30
   3   8  -1    2.80   22.00
   3   8  -1  -10.90   22.00
   3   8  -1  -13.40   14.70
   3   8  -1  -24.00   14.60
   3   8  -1    6.30   14.60
  -3  -8   1   18.00   17.40
  -3  -8   1   20.10   16.60
  -3  -8   1  -19.20   27.50
  -3  -8   1  -16.10   12.40
  -3  -8   1   14.30   13.60
  -3  -8   1  -17.60    8.90
  -3  -8   1   -2.80   17.10
  -3  -8   1  -33.90   19.30
   2   8  -1  119.79   14.30
   2   8  -1  107.99   19.90
   2   8  -1  132.59   29.70
   2   8  -1  129.09   22.20
   2   8  -1  158.08   23.80
   2   8  -1  130.99   37.50
   2   8  -1  123.89   21.40
   2   8  -1  109.09   23.90
   2   8  -1   92.79   30.20
   2   8  -1  126.59   22.70
  -2  -8   1  167.58   19.10
  -2  -8   1  134.79   24.10
  -2  -8   1  120.79   39.10
  -2  -8   1  121.59   20.30
  -2  -8   1  140.89   24.40
  -2  -8   1  119.49   29.60
  -2  -8   1  134.49   20.30
   1   8  -1   82.29   17.90
   1   8  -1   90.49   21.80
   1   8  -1   55.69   14.30
   1   8  -1   63.39   25.60
   1   8  -1   79.69   40.50
   1   8  -1   80.29   16.80
   1   8  -1   81.09   21.60
   1   8  -1   89.09   17.40
   1   8  -1   96.99   20.50
   1   8  -1   27.50   24.10
  -1  -8   1   98.39   16.50
  -1  -8   1   62.09   22.60
  -1  -8   1   73.99   21.20
  -1  -8   1   88.29   18.40
  -1  -8   1   74.99   15.50
   0   8  -1   65.49   18.90
   0   8  -1   53.49   26.30
   0   8  -1   52.69   24.00
   0   8  -1   76.09   19.40
   0   8  -1   44.70   22.00
   0   8  -1   72.59   14.90
   0   8  -1   39.70   18.20
   0   8  -1   50.79   25.90
   0  -8   1   75.19   19.80
   0  -8   1  107.99   28.50
   0  -8   1   68.09   16.10
   0  -8   1  117.69   16.70
   0  -8   1   92.99   17.90
   0  -8   1   92.09   18.10
   0  -8   1   72.49   21.20
   0  -8   1   76.79   22.00
  -1   8  -1    7.30   22.70
  -1   8  -1   22.60   21.40
  -1   8  -1  -10.70   12.60
  -1   8  -1   -5.10   20.30
  -1   8  -1    0.30   13.90
  -1   8  -1    6.90   12.90
  -1   8  -1   15.10   11.00
  -1   8  -1   18.10   20.60
  -1   8  -1    4.50   15.40
   1  -8   1   12.70   20.20
   1  -8   1   -1.10   17.60
   1  -8   1    5.50   14.00
   1  -8   1   12.60    9.80
   1  -8   1   -8.70   11.30
   1  -8   1   24.60   15.70
   1  -8   1    8.40   18.50
   1  -8   1   36.40   25.80
  -2   8  -1   23.10   24.90
  -2   8  -1   21.30   15.70
  -2   8  -1   -2.50   16.20
  -2   8  -1   11.80   21.20
  -2   8  -1   23.60   19.80
   2  -8   1   16.50   19.30
   2  -8   1   12.40   17.00
   2  -8   1   -1.20   16.10
   2  -8   1   14.90   24.10
   2  -8   1   14.90    8.40
   2  -8   1   27.60   17.10
   2  -8   1   21.30   11.30
   2  -8   1   40.90   22.90
   2  -8   1   34.00   14.20
  -3   8  -1  115.89   30.20
  -3   8  -1  100.79   25.70
  -3   8  -1  138.69   32.80
  -3   8  -1   67.89   25.30
  -3   8  -1  104.49   24.20
  -3   8  -1  143.19   31.50
  -3   8  -1   98.79   23.80
  -3   8  -1   81.69   22.30
   3  -8   1   74.49   22.00
   3  -8   1   61.49   22.00
   3  -8   1  104.89   20.50
   3  -8   1   76.79   14.80
   3  -8   1  100.19   25.90
   3  -8   1  138.29   37.90
  -4   8  -1   65.99   26.00
  -4   8  -1   78.19   24.50
  -4   8  -1   28.20   44.50
  -4   8  -1   47.80   43.30
  -4   8  -1  136.09   26.00
  -4   8  -1  136.39   33.20
  -4   8  -1   48.00   22.00
  -4   8  -1   66.99   25.00
   4  -8   1   92.69   32.40
   4  -8   1   44.50   19.10
   4  -8   1  116.69   29.80
   4  -8   1  113.19   25.70
   4  -8   1  130.39   37.80
   4  -8   1   25.00   24.80
   4  -8   1   76.39   14.50
  -5   8  -1  -65.29   40.10
  -5   8  -1    9.60   28.80
  -5   8  -1  -24.20   25.00
  -5   8  -1  -41.00   31.60
  -5   8  -1    3.50   27.30
  -5   8  -1   11.80   19.60
  -5   8  -1  -22.40   18.00
  -5   8  -1   -9.80   18.70
   5  -8   1    7.70   21.60
   5  -8   1  -17.70   22.10
   5  -8   1   43.90   31.00
   5  -8   1  -69.49   45.70
   5  -8   1   -6.10   10.30
   5  -8   1    2.50   23.30
   5  -8   1   30.20   19.60
  -6   8  -1  116.49   38.30
  -6   8  -1   28.10   22.10
  -6   8  -1  -15.70   20.70
  -6   8  -1   67.49   24.00
  -6   8  -1   21.60   28.10
  -6   8  -1  -14.10   20.50
   6  -8   1  -27.00   22.20
   6  -8   1   38.40   12.80
   6  -8   1   -1.20   18.10
   6  -8   1    2.30   23.00
   6  -8   1   91.59   28.40
   6  -8   1   17.70   29.40
   6  -8   1   45.40   26.30
  -7   8  -1  117.59   33.80
  -7   8  -1  133.39   31.70
  -7   8  -1   73.19   37.30
  -7   8  -1  134.79   36.50
  -7   8  -1   71.39   27.20
  -7   8  -1  151.28   44.60
   7  -8   1   45.50   31.50
   7  -8   1  172.88   43.30
   7  -8   1   96.19   19.40
   7  -8   1  149.29   38.20
   7  -8   1  173.98   34.70
  -8   8  -1    6.40   28.40
  -8   8  -1   76.79   26.40
  -8   8  -1   17.70   38.10
  -8   8  -1   -9.90   26.40
  -8   8  -1   27.30   26.60
   8  -8   1   37.10   31.90
   8  -8   1   48.70   32.50
   8  -8   1   65.29   44.20
   8  -8   1   27.00   31.70
  -9   8  -1   -6.20   18.60
  -9   8  -1   -0.20   28.00
  -9   8  -1   -9.50   29.80
  -9   8  -1  -31.10   23.80
  -9   8  -1   11.60   26.60
   9  -8   1   22.50   38.10
   9  -8   1   36.50   22.80
   9  -8   1   60.99   34.10
   9  -8   1   26.00   33.90
 -10   8  -1  233.98   45.40
 -10   8  -1  319.87   64.99
 -10   8  -1  362.16   40.20
 -10   8  -1  304.07   52.79
 -10   8  -1  448.86   55.19
  10  -8   1  338.87   64.29
  10  -8   1  253.37   98.39
  10  -8   1  276.37   51.59
  10  -8   1  180.08   57.79
 -11   8  -1  203.68   44.50
 -11   8  -1  187.78   29.90
 -11   8  -1  204.48   63.09
 -11   8  -1  106.29   38.70
 -11   8  -1  133.29   47.70
  11  -8   1  253.37   72.59
  11  -8   1  196.68   58.49
  11  -8   1  140.49   34.30
  11  -8   1  122.49   47.10
  11  -8   1   85.99   46.90
 -12   8  -1   23.30   35.20
 -12   8  -1   36.60   50.09
 -12   8  -1   47.00   45.70
 -12   8  -1   56.69   26.70
 -12   8  -1   33.70   38.10
  12  -8   1   68.89   50.99
  12  -8   1  -34.30   58.29
  12  -8   1  -69.89   49.70
  12  -8   1   45.60   30.40
  12  -8   1   -8.30   36.10
 -13   8  -1  -40.90   35.60
 -13   8  -1  -20.30   39.80
 -13   8  -1   48.70   53.49
  13  -8   1    8.10   44.00
  13  -8   1  -55.19   57.79
  13  -8   1   42.70   42.10
  13  -8   1    4.00   42.50
  13   7  -1   -0.60   30.00
  13   7  -1   36.50   38.90
 -13  -7   1   32.70   44.30
 -13  -7   1   -0.60   46.20
  12   7  -1   38.00   33.40
  12   7  -1  -11.30   46.80
  12   7  -1   39.70   32.90
  12   7  -1  -31.20   21.70
  12   7  -1   -7.80   29.70
  12   7  -1   -4.50   33.60
 -12  -7   1    7.10   46.70
 -12  -7   1  -32.10   28.00
 -12  -7   1   50.99   21.50
 -12  -7   1  -21.70   42.70
  11   7  -1   43.10   32.00
  11   7  -1    9.70   28.70
  11   7  -1   24.50   28.30
  11   7  -1  -16.20   22.10
  11   7  -1   70.79   28.30
  11   7  -1    3.40   40.40
 -11  -7   1   21.20   44.80
 -11  -7   1   10.60   44.10
 -11  -7   1   31.60   35.50
  10   7  -1   12.00   24.20
  10   7  -1  -34.80   21.10
  10   7  -1   20.00   26.00
  10   7  -1   -4.30   23.70
  10   7  -1   42.50   35.00
  10   7  -1   -9.70   26.80
 -10  -7   1  -29.30   23.00
 -10  -7   1  -18.70   38.70
 -10  -7   1   -0.20   27.40
 -10  -7   1   15.00   28.70
   9   7  -1  571.74   54.59
   9   7  -1  488.15   52.69
   9   7  -1  353.16   51.69
   9   7  -1  507.55   57.59
   9   7  -1  563.64   56.39
   9   7  -1  452.05   59.19
  -9  -7   1  443.46   47.60
  -9  -7   1  490.85   79.99
  -9  -7   1  496.85   57.09
  -9  -7   1  541.95   57.09
  -9  -7   1  522.95   63.39
   8   7  -1  851.01   68.49
   8   7  -1  903.61   70.79
   8   7  -1  826.72   88.49
   8   7  -1 1025.40   76.39
   8   7  -1  699.53   71.99
   8   7  -1  998.60   74.49
   8   7  -1  808.92   65.19
   8   7  -1  816.42   65.59
  -8  -7   1  918.71   76.59
  -8  -7   1  798.72   68.49
  -8  -7   1  956.70   75.19
  -8  -7   1  819.12   94.49
   7   7  -1  296.67   38.30
   7   7  -1  303.27   37.90
   7   7  -1  348.37   49.20
   7   7  -1  447.36   63.89
   7   7  -1  265.07   40.40
   7   7  -1  331.77   38.00
   7   7  -1  307.37   40.30
   7   7  -1  289.57   43.70
  -7  -7   1  268.97   40.60
  -7  -7   1  292.07   60.99
   6   7  -1  283.87   33.70
   6   7  -1  204.08   32.20
   6   7  -1  275.47   53.79
   6   7  -1  257.07   36.10
   6   7  -1  272.17   32.90
   6   7  -1  250.87   32.80
   6   7  -1  208.68   43.10
   6   7  -1  184.58   29.50
  -6  -7   1  254.97   50.49
  -6  -7   1  256.87   30.90
  -6  -7   1  216.28   33.40
  -6  -7   1  217.28   33.90
  -6  -7   1  192.98   33.40
  -6  -7   1  228.48   28.20
   5   7  -1  339.67   34.00
   5   7  -1  293.47   41.00
   5   7  -1  331.47   41.40
   5   7  -1  315.57   43.20
   5   7  -1  356.86   37.70
   5   7  -1  354.76   34.40
   5   7  -1  328.37   35.70
  -5  -7   1  322.17   41.20
  -5  -7   1  321.27   31.40
  -5  -7   1  389.16   37.00
  -5  -7   1  386.66   39.20
  -5  -7   1  330.97   39.10
  -5  -7   1  314.87   84.09
   4   7  -1  387.96   48.70
   4   7  -1  423.96   37.60
   4   7  -1  429.86   36.00
   4   7  -1  380.56   48.10
   4   7  -1  329.87   39.80
   4   7  -1  402.06   35.80
   4   7  -1  476.95   38.80
   4   7  -1  471.85   41.10
   4   7  -1  379.96   42.00
  -4  -7   1  409.76   34.20
  -4  -7   1  456.85   40.20
  -4  -7   1  448.86   36.20
  -4  -7   1  428.36   43.60
  -4  -7   1  446.26   31.20
  -4  -7   1  375.76   41.50
  -4  -7   1  361.46   52.59
   3   7  -1    6.50   22.30
   3   7  -1   10.40   20.60
   3   7  -1    9.40   12.50
   3   7  -1    3.60   14.40
   3   7  -1   37.40   14.90
   3   7  -1   24.40   17.90
   3   7  -1   -6.50   20.50
   3   7  -1    2.60   17.40
   3   7  -1   19.80   13.60
   3   7  -1   11.90   15.40
  -3  -7   1   16.20   10.00
  -3  -7   1  -17.00   25.00
  -3  -7   1    8.20   17.60
  -3  -7   1    7.60   15.00
  -3  -7   1   14.20   11.90
  -3  -7   1   24.00   20.80
  -3  -7   1   22.70   12.40
   2   7  -1 1876.31  119.09
   2   7  -1 2099.49  115.79
   2   7  -1 1797.42  100.39
   2   7  -1 1866.81  107.39
   2   7  -1 2057.89  108.59
   2   7  -1 1957.90  107.69
   2   7  -1 1917.21  122.59
   2   7  -1 2050.69  112.49
   2   7  -1 1844.22  107.69
   2   7  -1 1972.40  115.99
  -2  -7   1 1994.30  112.19
  -2  -7   1 1888.61  106.39
  -2  -7   1 1992.90  111.29
  -2  -7   1 2062.39  116.89
  -2  -7   1 2028.10  104.39
  -2  -7   1 1915.01  126.49
  -2  -7   1 1895.41  107.69
   1   7  -1 1527.05   86.69
   1   7  -1 1606.14   92.49
   1   7  -1 1535.85   84.29
   1   7  -1 1311.17   93.59
   1   7  -1 1284.77   80.69
   1   7  -1 1418.06   97.29
   1   7  -1 1405.76   79.59
   1   7  -1 1495.95   83.69
   1   7  -1 1491.45   89.09
   1   7  -1 1534.05   82.29
  -1  -7   1 1352.86   83.39
  -1  -7   1 1461.35   81.19
  -1  -7   1 1477.25   87.19
  -1  -7   1 1471.45   80.09
  -1  -7   1 1482.65   88.89
   0   7  -1   -0.10   20.70
   0   7  -1   -2.00   18.70
   0   7  -1   -0.50   12.10
   0   7  -1   -7.10   11.50
   0   7  -1   -4.90    8.10
   0   7  -1   -6.70   16.20
   0   7  -1    4.30   14.20
   0   7  -1   -1.30   17.50
   0   7  -1   14.00   11.50
   0   7  -1    2.60    9.30
   0  -7   1  -12.70   14.10
   0  -7   1   16.20   20.40
   0  -7   1   -4.20   11.00
   0  -7   1   -7.70   10.60
   0  -7   1   11.40    9.00
   0  -7   1    9.80   16.20
   0  -7   1  -16.70   13.90
   0  -7   1   -3.40   12.80
  -1   7  -1    0.30   18.80
  -1   7  -1   -4.50   12.50
  -1   7  -1   17.00   15.00
  -1   7  -1  -15.80   19.90
  -1   7  -1  -15.00   16.50
  -1   7  -1   24.90   19.00
  -1   7  -1   -3.50    8.60
  -1   7  -1   -5.70   12.00
  -1   7  -1    9.80   12.50
   1  -7   1  -45.10   16.70
   1  -7   1   -3.50   27.70
   1  -7   1   11.40   10.80
   1  -7   1   14.00   17.10
   1  -7   1  -15.90   16.40
   1  -7   1   -4.90   11.90
   1  -7   1    9.10   12.20
  -2   7  -1  228.08   39.30
  -2   7  -1  181.08   25.80
  -2   7  -1  180.48   28.40
  -2   7  -1  130.69   30.50
  -2   7  -1  161.68   24.10
   2  -7   1  180.98   17.90
   2  -7   1  203.18   29.80
   2  -7   1  194.68   36.50
   2  -7   1  178.58   34.10
   2  -7   1  178.58   22.90
   2  -7   1  149.99   24.80
   2  -7   1  185.48   26.40
   2  -7   1  215.88   27.00
   2  -7   1  189.98   19.40
  -3   7  -1  290.67   34.60
  -3   7  -1  312.07   44.50
  -3   7  -1  276.87   40.20
  -3   7  -1  393.46   47.30
  -3   7  -1  250.17   38.50
  -3   7  -1  365.66   37.90
  -3   7  -1  223.78   31.50
  -3   7  -1  250.47   40.30
   3  -7   1  310.87   36.90
   3  -7   1  328.37   26.50
   3  -7   1  356.76   42.70
   3  -7   1  316.27   35.90
   3  -7   1  388.86   34.60
   3  -7   1  305.97   46.80
   3  -7   1  324.07   41.70
   3  -7   1  344.57   41.30
  -4   7  -1   58.29   26.70
  -4   7  -1   57.19   21.20
  -4   7  -1   39.00   23.20
  -4   7  -1   50.89   21.90
  -4   7  -1   53.99   28.60
  -4   7  -1   14.70   24.30
  -4   7  -1   49.40   23.90
  -4   7  -1   51.69   19.90
   4  -7   1   65.39   21.80
   4  -7   1   61.99   31.50
   4  -7   1   46.40   14.50
   4  -7   1   33.80   27.70
   4  -7   1   41.50   18.00
   4  -7   1   51.39   23.90
   4  -7   1   41.80   51.49
   4  -7   1   44.70   24.40
  -5   7  -1   65.29   23.80
  -5   7  -1  156.68   29.70
  -5   7  -1   91.79   30.90
  -5   7  -1  143.29   36.10
  -5   7  -1   92.49   25.10
  -5   7  -1  107.39   28.70
   5  -7   1  112.59   16.40
   5  -7   1  151.48   37.20
   5  -7   1  147.79   29.10
   5  -7   1  144.99   37.90
   5  -7   1  118.19   29.20
   5  -7   1  114.09   29.70
   5  -7   1  102.99   23.00
   5  -7   1  129.19   29.20
  -6   7  -1   81.49   25.00
  -6   7  -1   68.19   36.00
  -6   7  -1   94.69   31.10
  -6   7  -1   81.89   25.90
  -6   7  -1  105.29   35.90
  -6   7  -1   58.09   25.10
  -6   7  -1   29.70   20.00
  -6   7  -1   76.59   24.40
   6  -7   1   30.10   23.50
   6  -7   1   89.89   29.80
   6  -7   1   64.99   21.30
   6  -7   1   85.59   16.30
   6  -7   1  137.99   38.60
   6  -7   1   81.49   30.40
   6  -7   1   64.09   27.50
  -7   7  -1  295.27   39.10
  -7   7  -1  277.47   51.49
  -7   7  -1  342.17   51.69
  -7   7  -1  198.18   37.10
   7  -7   1  245.78   56.59
   7  -7   1  238.58   45.50
   7  -7   1  242.78   39.30
   7  -7   1  220.08   40.50
   7  -7   1  319.17   44.40
  -8   7  -1   21.70   23.60
  -8   7  -1    7.90   22.40
  -8   7  -1   -3.00   22.00
  -8   7  -1   40.90   37.40
  -8   7  -1   27.00   28.00
   8  -7   1   -5.20   22.10
   8  -7   1   54.39   39.80
   8  -7   1   43.90   31.50
   8  -7   1    4.60   26.10
   8  -7   1  -14.20   27.60
   8  -7   1   -9.00   26.80
  -9   7  -1  303.57   61.19
  -9   7  -1  354.26   39.00
  -9   7  -1  338.07   50.79
  -9   7  -1  388.56   55.49
  -9   7  -1  465.05   50.09
  -9   7  -1  445.76   53.69
   9  -7   1  270.57   57.49
   9  -7   1  354.56   64.69
   9  -7   1  236.78   56.39
   9  -7   1  374.56   59.59
   9  -7   1  391.06   42.40
 -10   7  -1   58.89   32.80
 -10   7  -1   57.29   23.70
 -10   7  -1  151.08   66.99
 -10   7  -1  110.79   33.30
 -10   7  -1  131.19   40.80
  10  -7   1   58.79   33.50
  10  -7   1   75.99   41.20
  10  -7   1   29.90   41.50
  10  -7   1   29.00   25.50
  10  -7   1  100.19   54.59
 -11   7  -1   71.99   40.50
 -11   7  -1   69.19   51.29
 -11   7  -1   90.19   28.00
 -11   7  -1  110.59   38.80
 -11   7  -1   86.79   35.30
  11  -7   1  104.99   45.90
  11  -7   1  107.59   56.39
  11  -7   1  136.19   40.60
  11  -7   1  110.29   32.70
  11  -7   1  114.29   45.50
 -12   7  -1    8.30   45.10
 -12   7  -1  -58.89   31.80
 -12   7  -1   18.20   23.30
 -12   7  -1   -4.10   33.50
 -12   7  -1  -12.80   29.30
  12  -7   1  -11.30   43.50
  12  -7   1   73.89   54.59
  12  -7   1   25.20   29.60
  12  -7   1   56.19   41.90
  12  -7   1  105.69   50.99
 -13   7  -1  194.18   47.70
 -13   7  -1   51.79   30.50
 -13   7  -1  113.59   41.60
 -13   7  -1    7.60   48.20
 -13   7  -1   58.59   35.50
  13  -7   1   20.10   51.59
  13  -7   1   45.50   32.90
  13  -7   1   48.70   41.50
  13  -7   1   92.49   56.79
  13   6  -1   29.70   34.30
  13   6  -1   58.79   34.60
  13   6  -1   35.10   31.70
  13   6  -1   15.50   35.70
 -13  -6   1  -43.60   47.70
 -13  -6   1    4.70   48.30
 -13  -6   1   83.49   44.70
 -13  -6   1   99.79   35.70
  12   6  -1   36.80   28.50
  12   6  -1   14.60   45.10
  12   6  -1    9.70   35.40
  12   6  -1   59.49   34.30
  12   6  -1    6.50   30.50
  12   6  -1   72.99   37.10
 -12  -6   1  -10.00   23.20
 -12  -6   1    5.40   45.90
 -12  -6   1   65.29   32.20
 -12  -6   1   48.70   47.80
  11   6  -1   74.69   39.30
  11   6  -1  -29.20   31.10
  11   6  -1  -12.40   24.80
  11   6  -1   -5.20   27.00
  11   6  -1   -3.30   29.20
 -11  -6   1   -3.40   19.70
 -11  -6   1  -48.00   29.60
 -11  -6   1  -16.00   22.20
  10   6  -1   21.80   26.10
  10   6  -1   59.99   32.50
  10   6  -1  -22.50   22.40
  10   6  -1   46.20   26.00
  10   6  -1   59.29   38.70
 -10  -6   1   92.59   34.40
 -10  -6   1   -0.60   35.50
 -10  -6   1   88.89   26.20
 -10  -6   1   30.40   18.40
 -10  -6   1  131.19   36.00
 -10  -6   1   62.79   44.40
   9   6  -1  497.95   61.49
   9   6  -1  439.96   49.10
   9   6  -1  446.26   51.19
   9   6  -1  431.96   51.89
   9   6  -1  421.06   55.39
   9   6  -1  480.95   54.59
   9   6  -1  363.16   48.10
  -9  -6   1  406.66   53.89
  -9  -6   1  460.25   58.39
  -9  -6   1  562.04   80.59
  -9  -6   1  420.66   71.99
   8   6  -1   81.89   25.10
   8   6  -1   92.59   30.70
   8   6  -1   83.19   25.30
   8   6  -1   89.69   25.10
   8   6  -1   97.09   30.20
   8   6  -1   88.89   25.20
   8   6  -1   24.30   25.40
  -8  -6   1  105.09   24.40
  -8  -6   1   68.39   26.60
  -8  -6   1  112.09   30.10
  -8  -6   1   74.79   33.60
  -8  -6   1   69.89   14.50
  -8  -6   1  127.59   45.70
   7   6  -1  215.38   32.00
   7   6  -1  187.68   32.80
   7   6  -1  163.68   27.10
   7   6  -1  179.18   28.40
   7   6  -1  196.88   33.90
   7   6  -1  149.99   47.60
   7   6  -1  219.18   31.50
  -7  -6   1  226.98   49.40
  -7  -6   1  205.98   28.80
  -7  -6   1  216.68   30.90
  -7  -6   1  192.68   28.70
  -7  -6   1  189.48   33.50
  -7  -6   1  213.08   29.90
  -7  -6   1  117.69   30.70
  -7  -6   1  195.78   38.90
   6   6  -1   85.79   20.90
   6   6  -1   44.70   22.70
   6   6  -1   59.19   24.10
   6   6  -1   35.50   23.50
   6   6  -1   69.89   18.70
   6   6  -1   73.59   27.70
   6   6  -1   82.89   29.70
   6   6  -1   40.00   20.60
  -6  -6   1   58.19   16.60
  -6  -6   1   65.69   18.50
  -6  -6   1   15.50   19.90
  -6  -6   1   50.49   17.50
  -6  -6   1   77.59   17.50
  -6  -6   1   70.19   27.30
  -6  -6   1  103.79   36.70
   5   6  -1   37.90   22.50
   5   6  -1   46.00   18.00
   5   6  -1   64.59   25.40
   5   6  -1   61.39   21.90
   5   6  -1   75.69   20.30
   5   6  -1   47.30   16.20
   5   6  -1   68.89   17.30
   5   6  -1   54.79   20.20
   5   6  -1   38.90   16.90
  -5  -6   1   22.10   16.70
  -5  -6   1   47.80   16.10
  -5  -6   1   33.40   29.20
  -5  -6   1   27.30   19.60
  -5  -6   1   41.80   22.30
  -5  -6   1   37.30   13.70
   4   6  -1   56.99   16.90
   4   6  -1   74.99   24.60
   4   6  -1   59.39   22.40
   4   6  -1  102.89   18.60
   4   6  -1   20.90   21.60
   4   6  -1   94.09   17.00
   4   6  -1   98.09   20.80
   4   6  -1   70.09   15.40
  -4  -6   1   57.49   25.50
  -4  -6   1   53.49   16.90
  -4  -6   1   82.19   16.70
  -4  -6   1   55.99   21.20
  -4  -6   1   89.69   15.10
  -4  -6   1   63.89   19.50
  -4  -6   1   83.19   13.90
   3   6  -1  829.22   52.99
   3   6  -1  812.72   51.59
   3   6  -1  811.32   56.59
   3   6  -1  711.23   62.49
   3   6  -1  787.62   63.09
   3   6  -1  915.71   53.39
   3   6  -1  741.33   62.89
   3   6  -1  757.12   50.89
  -3  -6   1  806.42   54.79
  -3  -6   1  800.52   51.19
  -3  -6   1  752.92   56.89
  -3  -6   1  797.02   48.10
  -3  -6   1  854.21   51.09
  -3  -6   1  860.81   70.69
  -3  -6   1  810.72   58.09
   2   6  -1  203.08   23.80
   2   6  -1  204.48   26.00
   2   6  -1  203.18   22.70
   2   6  -1  206.98   24.10
   2   6  -1  224.28   30.10
   2   6  -1  171.88   31.40
   2   6  -1  182.98   24.30
   2   6  -1  204.58   25.50
   2   6  -1  183.38   31.40
  -2  -6   1  198.98   21.40
  -2  -6   1  232.88   28.40
  -2  -6   1  202.68   30.20
  -2  -6   1  243.38   23.10
  -2  -6   1  215.78   26.90
  -2  -6   1  212.88   19.50
  -2  -6   1  194.78   36.10
   1   6  -1   14.20   11.20
   1   6  -1   10.90   11.20
   1   6  -1   14.70   10.90
   1   6  -1    1.20   11.30
   1   6  -1    6.80    8.60
   1   6  -1   -5.30    8.80
   1   6  -1    3.70   13.80
   1   6  -1   -3.40   15.50
   1   6  -1    0.30   16.00
   1   6  -1  -12.20   17.30
  -1  -6   1    2.30   21.50
  -1  -6   1   12.00    9.10
  -1  -6   1    5.30    9.50
  -1  -6   1   -9.40    7.60
  -1  -6   1   18.30    9.30
  -1  -6   1   36.70   17.30
  -1  -6   1   11.50   18.00
  -1  -6   1    7.80   13.70
   0   6  -1  275.47   27.20
   0   6  -1  296.87   25.90
   0   6  -1  260.37   25.90
   0   6  -1  237.18   31.90
   0   6  -1  275.97   29.30
   0   6  -1  339.77   41.40
   0   6  -1  278.67   23.80
   0   6  -1  329.17   37.80
   0   6  -1  228.18   20.70
   0   6  -1  280.27   36.10
   0  -6   1  297.07   27.60
   0  -6   1  299.27   32.50
   0  -6   1  295.87   32.80
   0  -6   1  291.67   23.90
   0  -6   1  302.57   35.10
   0  -6   1  267.47   24.90
   0  -6   1  268.17   22.50
   0  -6   1  273.07   27.80
  -1   6  -1   -4.30   11.60
  -1   6  -1   12.90   20.90
  -1   6  -1   23.90   19.80
  -1   6  -1    3.70   19.20
  -1   6  -1   12.80   14.30
  -1   6  -1    7.90   12.70
  -1   6  -1   23.70    9.80
  -1   6  -1   -4.10   16.60
   1  -6   1   30.50   14.60
   1  -6   1  -10.90   19.00
   1  -6   1   22.30   17.70
   1  -6   1    2.70    8.30
   1  -6   1   13.90   13.20
   1  -6   1   -7.50   25.30
   1  -6   1   -9.00   16.10
  -2   6  -1  190.48   25.80
  -2   6  -1  230.18   27.70
  -2   6  -1  222.88   33.60
  -2   6  -1  214.78   32.40
  -2   6  -1  190.28   32.60
  -2   6  -1  207.48   29.00
  -2   6  -1  254.47   28.20
   2  -6   1  226.48   37.30
   2  -6   1  195.68   28.30
   2  -6   1  259.77   20.30
   2  -6   1  166.08   18.70
   2  -6   1  217.58   30.80
   2  -6   1  217.08   25.20
   2  -6   1  243.68   35.00
   2  -6   1  219.28   27.20
   2  -6   1  218.08   27.30
  -3   6  -1  108.29   21.30
  -3   6  -1  147.79   24.40
  -3   6  -1  111.79   26.40
  -3   6  -1  100.19   29.20
  -3   6  -1  109.59   27.50
  -3   6  -1  109.79   24.30
  -3   6  -1  163.18   28.20
  -3   6  -1   72.89   20.90
   3  -6   1  128.29   15.50
   3  -6   1   91.79   25.40
   3  -6   1   87.69   21.00
   3  -6   1   46.00   20.90
   3  -6   1  100.69   23.10
   3  -6   1   72.69   28.10
   3  -6   1  100.39   19.40
   3  -6   1   44.40   25.10
  -4   6  -1  582.74   47.80
  -4   6  -1  620.94   56.49
  -4   6  -1  641.84   54.09
  -4   6  -1  558.44   48.70
  -4   6  -1  671.53   52.09
  -4   6  -1  655.73   58.19
  -4   6  -1  515.45   55.09
   4  -6   1  659.13   50.19
   4  -6   1  562.14   46.10
   4  -6   1  624.04   44.90
   4  -6   1  551.34   51.29
   4  -6   1  616.24   59.59
   4  -6   1  584.24   60.79
   4  -6   1  562.14   54.19
   4  -6   1  625.94   51.89
  -5   6  -1   15.30   20.00
  -5   6  -1    0.90   14.70
  -5   6  -1    5.10   21.50
  -5   6  -1   12.10   17.00
  -5   6  -1   10.20   20.10
  -5   6  -1    5.30   21.00
  -5   6  -1   19.20   16.60
  -5   6  -1    5.70   17.20
   5  -6   1   22.60   15.40
   5  -6   1   17.20   23.10
   5  -6   1   13.50   17.40
   5  -6   1   49.30   27.00
   5  -6   1  -10.10   18.40
   5  -6   1   14.40   18.60
   5  -6   1    9.70   22.70
  -6   6  -1   47.40   27.90
  -6   6  -1   50.09   27.40
  -6   6  -1   37.30   20.20
  -6   6  -1   62.79   34.90
  -6   6  -1   71.79   25.90
  -6   6  -1   66.09   21.50
  -6   6  -1  117.19   27.70
   6  -6   1  138.19   37.70
   6  -6   1   84.09   34.70
   6  -6   1   56.19   25.90
   6  -6   1   44.50   23.50
   6  -6   1   83.19   25.20
  -7   6  -1   -5.90   19.70
  -7   6  -1  -20.40   21.90
  -7   6  -1    5.20   27.40
  -7   6  -1   13.70   25.00
  -7   6  -1  -15.60   18.70
  -7   6  -1   13.60   28.30
  -7   6  -1  -14.80   18.50
  -7   6  -1   -9.70   18.00
   7  -6   1   22.10   25.40
   7  -6   1   39.50   55.49
   7  -6   1   -1.70   23.90
   7  -6   1    2.20   27.20
   7  -6   1  -19.80   23.00
   7  -6   1   35.70   20.50
   7  -6   1    8.10   22.90
  -8   6  -1  -26.80   14.70
  -8   6  -1   -4.80   24.30
  -8   6  -1    0.30   40.20
  -8   6  -1  -14.70   19.20
  -8   6  -1    7.70   29.50
  -8   6  -1  -12.90   20.00
  -8   6  -1  -29.70   21.50
   8  -6   1   13.60   18.30
   8  -6   1   12.30   22.80
   8  -6   1    9.60   26.70
   8  -6   1  -32.00   22.50
   8  -6   1  -46.80   21.70
   8  -6   1   19.40   33.90
  -9   6  -1  -44.70   32.10
  -9   6  -1  -20.20   23.20
  -9   6  -1   19.40   18.20
  -9   6  -1   14.20   32.50
  -9   6  -1   16.40   26.00
  -9   6  -1  -26.60   23.40
   9  -6   1   -4.90   28.40
   9  -6   1   -2.70   19.30
   9  -6   1   87.39   30.00
   9  -6   1  -19.70   36.10
   9  -6   1  -17.60   36.70
   9  -6   1   20.80   32.90
 -10   6  -1   13.50   20.30
 -10   6  -1   -8.90   42.50
 -10   6  -1   51.69   28.10
 -10   6  -1   16.20   34.70
 -10   6  -1   29.50   30.00
  10  -6   1  108.39   35.10
  10  -6   1   11.50   50.39
  10  -6   1    7.00   39.60
  10  -6   1   -8.60   39.60
  10  -6   1   23.80   23.90
 -11   6  -1   27.40   29.10
 -11   6  -1   -8.60   19.30
 -11   6  -1   -9.80   32.90
 -11   6  -1   10.60   26.50
 -11   6  -1   18.70   41.30
  11  -6   1   17.10   31.00
  11  -6   1  -36.00   21.20
  11  -6   1   30.70   45.30
  11  -6   1   -6.60   36.20
 -12   6  -1  -14.80   46.50
 -12   6  -1    4.30   31.50
 -12   6  -1   -4.00   29.20
 -12   6  -1   -4.20   36.60
 -12   6  -1   57.49   25.10
  12  -6   1   39.50   41.60
  12  -6   1  -47.60   29.70
  12  -6   1   57.29   49.20
  12  -6   1   11.90   28.10
  12  -6   1   80.29   41.80
 -13   6  -1  -26.70   31.90
 -13   6  -1   15.00   32.30
 -13   6  -1  -56.29   43.90
 -13   6  -1  -14.30   36.70
 -13   6  -1   29.30   39.90
  13  -6   1   -1.20   46.30
  13  -6   1   42.80   44.50
  13  -6   1  -11.90   27.60
  13  -6   1  -87.59   48.30
  13  -6   1   29.20   40.40
  14  -6   1   24.80   44.20
  14   5  -1    4.20   32.10
  14   5  -1   39.60   47.90
  14   5  -1   33.90   46.70
 -14  -5   1    7.90   47.90
 -14  -5   1   28.20   58.89
 -14  -5   1   58.29   51.69
  13   5  -1   16.80   27.80
  13   5  -1    8.50   28.80
  13   5  -1   53.09   38.60
  13   5  -1  -23.10   37.20
 -13  -5   1  -35.50   32.70
 -13  -5   1  -52.29   40.40
 -13  -5   1   -6.50   48.20
 -13  -5   1  -26.00   31.40
 -13  -5   1   13.40   40.30
  12   5  -1   24.80   35.90
  12   5  -1   19.40   27.80
  12   5  -1   16.50   31.20
  12   5  -1   71.09   32.10
  12   5  -1  -96.99   46.60
  12   5  -1    2.30   44.10
 -12  -5   1    8.30   44.40
 -12  -5   1    5.50   46.10
 -12  -5   1    0.90   28.10
 -12  -5   1   -1.20   32.20
  11   5  -1   81.39   34.00
  11   5  -1  134.29   35.60
  11   5  -1  112.19   33.40
  11   5  -1  103.39   39.20
  11   5  -1   87.79   53.59
 -11  -5   1  125.09   53.49
 -11  -5   1   70.29   27.80
 -11  -5   1  123.29   32.50
 -11  -5   1  154.78   41.90
 -11  -5   1  131.69   41.90
 -11  -5   1   77.89   48.80
  10   5  -1  176.88   35.50
  10   5  -1  150.18   38.40
  10   5  -1  198.78   36.50
  10   5  -1  150.08   37.20
  10   5  -1  132.29   33.00
  10   5  -1  190.58   41.40
  10   5  -1  170.08   34.90
 -10  -5   1  169.48   32.00
 -10  -5   1  163.08   52.79
 -10  -5   1  133.99   27.30
 -10  -5   1  207.48   52.29
 -10  -5   1   69.79   47.70
   9   5  -1  150.08   32.80
   9   5  -1  132.49   36.90
   9   5  -1  161.48   33.30
   9   5  -1  154.98   32.10
   9   5  -1  191.88   37.30
   9   5  -1  127.19   31.40
   9   5  -1   86.99   28.80
  -9  -5   1  110.99   25.10
  -9  -5   1  158.88   35.80
  -9  -5   1  202.38   46.20
  -9  -5   1  207.98   49.00
  -9  -5   1  159.88   30.30
  -9  -5   1  124.39   34.40
   8   5  -1    5.80   21.20
   8   5  -1  -11.10   17.80
   8   5  -1  -21.80   16.20
   8   5  -1    2.60   21.70
   8   5  -1   -8.50   20.70
   8   5  -1   -0.30   20.70
   8   5  -1   19.30   18.80
  -8  -5   1   -5.80   15.30
  -8  -5   1  -13.30   17.60
  -8  -5   1   -6.10   20.60
  -8  -5   1  -33.70   26.90
  -8  -5   1   26.70   32.70
   7   5  -1  151.08   36.00
   7   5  -1  135.19   25.20
   7   5  -1  120.09   28.90
   7   5  -1   91.39   24.10
   7   5  -1   85.39   25.90
   7   5  -1  141.69   25.10
   7   5  -1  140.19   30.10
   7   5  -1  121.39   25.10
  -7  -5   1  123.09   22.50
  -7  -5   1   96.69   20.10
  -7  -5   1  119.49   16.90
  -7  -5   1  115.79   38.40
  -7  -5   1  108.69   27.70
  -7  -5   1  173.98   37.40
  -7  -5   1  128.29   24.60
  -7  -5   1  106.49   27.50
   6   5  -1  -17.00   12.40
   6   5  -1   -3.30   21.70
   6   5  -1   -0.20   17.30
   6   5  -1   -8.40   13.50
   6   5  -1    6.80   17.20
   6   5  -1   18.90   19.30
   6   5  -1    2.00   13.10
   6   5  -1  -19.80   15.60
   6   5  -1   28.40   16.20
  -6  -5   1    7.70   17.10
  -6  -5   1    6.00   17.10
  -6  -5   1   25.50   14.40
  -6  -5   1   -6.40   13.00
  -6  -5   1  -16.70   20.80
  -6  -5   1   37.30   27.80
  -6  -5   1    1.80   12.50
  -6  -5   1    8.90    8.70
  -6  -5   1   -3.40   12.60
   5   5  -1   28.30   13.60
   5   5  -1   17.80   15.20
   5   5  -1   29.60   14.70
   5   5  -1   19.20   16.10
   5   5  -1   -4.30   17.20
   5   5  -1    0.00   15.50
   5   5  -1   59.89   23.80
   5   5  -1   20.00   15.20
  -5  -5   1    1.20   15.20
  -5  -5   1   39.40   24.90
  -5  -5   1   15.00   13.00
  -5  -5   1   10.40   11.70
  -5  -5   1   15.90   12.00
  -5  -5   1   33.30   15.60
  -5  -5   1    9.30   19.70
   4   5  -1  558.04   40.30
   4   5  -1  519.45   49.60
   4   5  -1  527.85   41.90
   4   5  -1  515.75   46.60
   4   5  -1  516.55   42.70
   4   5  -1  475.95   42.80
   4   5  -1  581.34   39.70
   4   5  -1  545.85   39.20
   4   5  -1  543.05   40.00
  -4  -5   1  600.74   57.59
  -4  -5   1  487.25   47.40
  -4  -5   1  584.44   43.50
  -4  -5   1  497.75   37.60
  -4  -5   1  542.75   36.60
  -4  -5   1  604.74   45.50
  -4  -5   1  570.34   38.80
   3   5  -1  223.48   29.40
   3   5  -1  225.18   32.30
   3   5  -1  259.97   39.50
   3   5  -1  278.97   25.70
   3   5  -1  238.58   24.80
   3   5  -1  212.88   25.60
   3   5  -1  228.58   32.00
   3   5  -1  236.68   23.20
   3   5  -1  258.27   24.40
  -3  -5   1  224.08   36.30
  -3  -5   1  205.58   27.20
  -3  -5   1  207.68   22.40
  -3  -5   1  204.38   29.70
  -3  -5   1  278.07   27.60
  -3  -5   1  240.78   23.10
  -3  -5   1  251.97   21.70
   2   5  -1  308.07   39.00
   2   5  -1  321.97   37.80
   2   5  -1  371.16   29.60
   2   5  -1  369.96   28.10
   2   5  -1  349.27   30.60
   2   5  -1  360.16   34.20
   2   5  -1  350.56   28.00
   2   5  -1  321.17   27.00
  -2  -5   1  344.57   25.30
  -2  -5   1  359.26   43.60
  -2  -5   1  300.57   35.60
  -2  -5   1  336.17   27.00
  -2  -5   1  393.26   34.10
  -2  -5   1  393.36   32.00
  -2  -5   1  397.76   28.20
   1   5  -1  585.44   39.60
   1   5  -1  458.45   47.10
   1   5  -1  580.54   36.60
   1   5  -1  600.54   37.60
   1   5  -1  561.14   33.50
   1   5  -1  566.14   44.60
   1   5  -1  552.84   41.40
   1   5  -1  555.44   36.90
   1   5  -1  544.45   48.20
   1   5  -1  571.04   36.20
  -1  -5   1  543.15   36.90
  -1  -5   1  481.95   49.80
  -1  -5   1  546.45   33.20
  -1  -5   1  612.84   41.90
  -1  -5   1  559.64   43.70
  -1  -5   1  564.54   34.90
  -1  -5   1  543.55   43.70
  -1  -5   1  541.75   35.20
   0   5  -1    5.60    7.40
   0   5  -1    4.90    9.50
   0   5  -1    9.00    8.20
   0   5  -1   27.50   10.00
   0   5  -1    8.00   10.30
   0   5  -1    4.00   15.20
   0   5  -1   -0.20   14.10
   0   5  -1    2.00   11.30
   0   5  -1   -6.10   15.60
   0   5  -1   -1.30   14.50
   0  -5   1   23.40    9.20
   0  -5   1    8.40   16.20
   0  -5   1    8.10    9.90
   0  -5   1    0.40   10.50
   0  -5   1   24.70   15.60
   0  -5   1    6.30    9.30
   0  -5   1   13.70    7.70
   0  -5   1  -13.20   12.40
  -1   5  -1  109.69   20.50
  -1   5  -1  121.39   17.10
  -1   5  -1  114.59   17.40
  -1   5  -1  111.59   13.80
  -1   5  -1  109.29   22.80
   1  -5   1   98.19   16.70
   1  -5   1   93.19   30.30
   1  -5   1  122.09   23.40
   1  -5   1  116.49   18.70
   1  -5   1   89.69    9.70
   1  -5   1   97.09   22.10
   1  -5   1  100.19   15.70
   1  -5   1  114.39   14.00
   1  -5   1   91.49   23.10
  -2   5  -1 2238.18  130.29
  -2   5  -1 2326.17  125.99
  -2   5  -1 2167.58  122.19
  -2   5  -1 2260.37  127.79
  -2   5  -1 2079.39  128.99
  -2   5  -1 2282.67  123.79
  -2   5  -1 2307.67  123.79
   2  -5   1 2200.68  130.29
   2  -5   1 2326.47  122.59
   2  -5   1 2215.08  130.09
   2  -5   1 2283.37  124.09
   2  -5   1 2204.68  122.19
   2  -5   1 2328.57  125.49
   2  -5   1 2394.26  128.29
   2  -5   1 2262.77  117.69
  -3   5  -1   68.79   24.50
  -3   5  -1   80.29   17.80
  -3   5  -1   40.90   17.20
  -3   5  -1   50.09   15.80
  -3   5  -1   26.30   15.00
  -3   5  -1   46.10   19.00
  -3   5  -1   72.09   22.60
  -3   5  -1   91.49   25.90
   3  -5   1   63.79   21.00
   3  -5   1   42.60   17.80
   3  -5   1   47.10   22.70
   3  -5   1   49.30   14.60
   3  -5   1   47.20   10.40
   3  -5   1   43.10   24.40
   3  -5   1   66.79   18.20
   3  -5   1   63.39   17.00
  -4   5  -1  737.63   53.69
  -4   5  -1  711.13   52.19
  -4   5  -1  601.94   57.39
  -4   5  -1  645.04   51.29
  -4   5  -1  734.93   55.59
  -4   5  -1  652.53   57.79
  -4   5  -1  652.23   49.40
  -4   5  -1  751.02   59.69
   4  -5   1  737.43   61.29
   4  -5   1  719.43   54.39
   4  -5   1  766.12   57.59
   4  -5   1  788.12   56.59
   4  -5   1  670.53   61.39
   4  -5   1  709.33   50.99
   4  -5   1  702.63   51.39
  -5   5  -1   -7.20   13.80
  -5   5  -1   25.90   19.40
  -5   5  -1   11.00   17.00
  -5   5  -1  -17.60   19.50
  -5   5  -1   11.10   18.00
  -5   5  -1   -6.90   13.60
  -5   5  -1   18.40   17.20
   5  -5   1    1.70   17.00
   5  -5   1    5.90   13.10
   5  -5   1   19.70   22.80
   5  -5   1   21.30   24.70
   5  -5   1   -3.10   14.90
   5  -5   1   18.40   21.60
  -6   5  -1  497.85   56.19
  -6   5  -1  433.46   43.80
  -6   5  -1  396.36   49.80
  -6   5  -1  470.55   54.29
  -6   5  -1  507.35   44.10
  -6   5  -1  438.46   41.60
  -6   5  -1  399.96   44.20
  -6   5  -1  425.16   44.60
   6  -5   1  447.86   55.49
   6  -5   1  365.36   41.30
   6  -5   1  393.36   49.60
   6  -5   1  480.95   63.49
   6  -5   1  493.75   45.90
   6  -5   1  449.16   44.80
   6  -5   1  504.65   50.49
  -7   5  -1  225.68   66.79
  -7   5  -1  159.28   34.10
  -7   5  -1  203.58   41.70
  -7   5  -1  160.48   31.50
  -7   5  -1  148.39   29.90
  -7   5  -1  259.17   34.10
   7  -5   1  155.88   34.80
   7  -5   1  255.67   40.60
   7  -5   1  254.17   47.90
   7  -5   1  300.97   40.40
   7  -5   1  244.18   39.00
   7  -5   1  247.58   47.20
  -8   5  -1   20.30   31.90
  -8   5  -1  -19.30   13.90
  -8   5  -1    3.10   19.20
  -8   5  -1   -4.00   27.90
  -8   5  -1    0.80   22.80
  -8   5  -1    3.70   19.80
  -8   5  -1  -14.90   19.40
   8  -5   1   -4.70   21.00
   8  -5   1   -3.50   14.90
   8  -5   1   24.40   29.70
   8  -5   1   -2.70   22.90
   8  -5   1    3.50   22.60
   8  -5   1  -26.60   22.90
   8  -5   1  -27.30   29.00
  -9   5  -1  -17.90   20.40
  -9   5  -1   37.40   29.10
  -9   5  -1   22.00   23.10
  -9   5  -1   47.50   33.80
  -9   5  -1    5.50   24.10
  -9   5  -1   41.80   19.80
   9  -5   1  -38.40   22.40
   9  -5   1   -3.50   19.50
   9  -5   1   20.90   48.40
   9  -5   1  -44.10   24.70
   9  -5   1  -39.60   28.40
 -10   5  -1   29.70   20.90
 -10   5  -1   46.80   25.40
 -10   5  -1   -4.00   26.10
 -10   5  -1   68.39   51.89
 -10   5  -1   36.20   36.90
  10  -5   1  -43.90   37.50
  10  -5   1   19.00   38.20
  10  -5   1   93.49   31.00
  10  -5   1  -31.00   26.60
  10  -5   1   58.19   30.90
  10  -5   1   17.90   21.50
 -11   5  -1   38.80   23.50
 -11   5  -1   12.50   23.60
 -11   5  -1   27.90   26.60
 -11   5  -1  -30.60   27.90
 -11   5  -1   51.49   42.80
  11  -5   1    6.40   29.60
  11  -5   1    4.00   32.30
  11  -5   1    9.20   24.40
  11  -5   1   -2.70   40.90
  11  -5   1   15.50   35.70
 -12   5  -1   19.20   25.70
 -12   5  -1   -3.30   28.10
 -12   5  -1   17.80   34.60
 -12   5  -1   -9.20   30.40
 -12   5  -1    2.50   44.60
  12  -5   1   29.60   43.90
  12  -5   1   88.59   52.89
  12  -5   1   26.60   37.50
  12  -5   1   53.89   27.80
  12  -5   1    3.10   37.90
 -13   5  -1    0.50   30.90
 -13   5  -1  -19.50   31.50
 -13   5  -1  -36.00   33.00
 -13   5  -1  -50.89   45.10
 -13   5  -1   24.70   41.50
  13  -5   1  -13.00   35.20
  13  -5   1   21.70   50.79
  13  -5   1   12.50   37.10
  13  -5   1   20.50   45.90
  13  -5   1   -7.60   36.90
 -14   5  -1   38.90   46.40
 -14   5  -1   46.40   50.09
  14  -5   1   48.50   49.99
  14  -5   1   39.80   40.70
  14  -5   1   81.49   42.50
  14   4  -1   29.20   31.90
  14   4  -1    0.50   64.79
 -14  -4   1  -27.40   44.40
 -14  -4   1  151.28   45.50
 -14  -4   1  -44.80   40.70
  13   4  -1   26.00   31.10
  13   4  -1   27.10   32.20
  13   4  -1   56.29   44.00
  13   4  -1   -4.30   34.70
  13   4  -1   52.09   42.00
 -13  -4   1   91.39   51.99
 -13  -4   1   75.69   36.50
 -13  -4   1  -24.60   53.19
 -13  -4   1   80.89   45.10
 -13  -4   1   49.80   39.80
  12   4  -1   82.49   42.00
  12   4  -1   72.19   30.70
  12   4  -1   50.59   49.50
  12   4  -1   23.70   33.00
  12   4  -1   56.19   33.90
  12   4  -1   77.99   37.40
 -12  -4   1    1.80   31.20
 -12  -4   1   64.69   48.10
 -12  -4   1   16.00   38.90
 -12  -4   1   22.50   29.30
 -12  -4   1  -26.70   40.50
 -12  -4   1  -11.40   32.00
  11   4  -1  300.47   50.79
  11   4  -1  514.25   93.79
  11   4  -1  398.06   50.39
  11   4  -1  332.87   53.89
  11   4  -1  368.86   72.39
  11   4  -1  363.66   55.79
 -11  -4   1  398.46   49.70
 -11  -4   1  301.77   66.89
 -11  -4   1  165.98   58.09
 -11  -4   1  262.07   56.49
 -11  -4   1  304.07   44.80
 -11  -4   1  377.66   55.69
 -11  -4   1  304.77   52.29
  10   4  -1   32.00   31.40
  10   4  -1   58.59   28.20
  10   4  -1   53.59   27.90
  10   4  -1   39.10   25.00
  10   4  -1    2.30   35.20
  10   4  -1   47.10   27.60
  10   4  -1   24.20   25.30
 -10  -4   1   27.90   31.00
 -10  -4   1   57.19   22.70
 -10  -4   1   62.49   36.90
 -10  -4   1   76.69   32.20
 -10  -4   1   34.60   40.80
 -10  -4   1   22.00   24.00
 -10  -4   1  -23.20   42.80
   9   4  -1  191.18   32.70
   9   4  -1  173.28   33.90
   9   4  -1  165.28   37.90
   9   4  -1  152.68   39.70
   9   4  -1  115.19   29.20
   9   4  -1  147.59   30.90
  -9  -4   1  146.39   34.80
  -9  -4   1  180.68   31.80
  -9  -4   1  111.89   42.20
  -9  -4   1  117.79   23.90
  -9  -4   1  202.88   37.40
  -9  -4   1  147.69   36.80
  -9  -4   1  175.78   50.59
   8   4  -1   95.09   25.80
   8   4  -1   90.09   25.30
   8   4  -1  114.89   27.00
   8   4  -1   94.79   25.20
   8   4  -1  171.58   30.70
   8   4  -1  137.19   30.00
   8   4  -1  113.59   32.50
  -8  -4   1  107.79   33.00
  -8  -4   1  106.89   19.60
  -8  -4   1  123.09   24.20
  -8  -4   1  156.68   31.80
  -8  -4   1   98.39   26.60
  -8  -4   1   99.79   43.20
  -8  -4   1   87.39   24.40
  -8  -4   1   64.59   28.90
  -8  -4   1   73.79   22.90
   7   4  -1  392.36   36.60
   7   4  -1  317.47   40.60
   7   4  -1  315.67   36.50
   7   4  -1  239.58   42.40
   7   4  -1  369.96   39.70
  -7  -4   1  327.47   37.50
  -7  -4   1  334.67   33.50
  -7  -4   1  347.07   41.50
  -7  -4   1  317.77   34.10
  -7  -4   1  394.66   56.39
  -7  -4   1  311.67   36.20
  -7  -4   1  306.17   40.70
  -7  -4   1  349.17   44.30
  -7  -4   1  373.36   35.60
  -7  -4   1  332.27   49.10
   6   4  -1  269.17   30.70
   6   4  -1  292.37   30.60
   6   4  -1  305.67   40.80
   6   4  -1  250.07   29.70
   6   4  -1  216.68   31.40
   6   4  -1  265.37   42.10
   6   4  -1  288.97   38.30
   6   4  -1  239.68   33.00
   6   4  -1  242.28   30.20
  -6  -4   1  263.17   27.50
  -6  -4   1  218.48   32.50
  -6  -4   1  232.58   24.20
  -6  -4   1  253.37   34.60
  -6  -4   1  321.37   43.40
  -6  -4   1  260.47   42.70
  -6  -4   1  246.78   36.10
  -6  -4   1  237.08   27.20
  -6  -4   1  275.17   30.60
   5   4  -1 1814.82   98.69
   5   4  -1 1732.63  109.89
   5   4  -1 1768.42   98.69
   5   4  -1 1615.74  101.99
   5   4  -1 1638.24  102.69
   5   4  -1 1866.71  103.79
   5   4  -1 1799.62  102.89
   5   4  -1 1544.75   97.99
   5   4  -1 1815.32   99.79
  -5  -4   1 1823.02  103.59
  -5  -4   1 1853.11   98.79
  -5  -4   1 1693.33  102.39
  -5  -4   1 1778.32   97.69
  -5  -4   1 1640.94  106.89
  -5  -4   1 1736.73   92.09
  -5  -4   1 1683.53   97.49
  -5  -4   1 1742.63  112.19
  -5  -4   1 1640.84  105.19
  -5  -4   1 1801.12   98.79
   4   4  -1   47.10   18.10
   4   4  -1   35.40   13.50
   4   4  -1   66.79   18.30
   4   4  -1   63.19   17.70
   4   4  -1   37.60   13.10
   4   4  -1   22.10   14.30
   4   4  -1   70.59   22.80
   4   4  -1   29.90   12.00
   4   4  -1   35.40   12.60
  -4  -4   1   42.90   15.70
  -4  -4   1   14.80   20.20
  -4  -4   1   36.00    8.00
  -4  -4   1   41.30   15.80
  -4  -4   1   50.99   12.40
  -4  -4   1   46.60   12.60
  -4  -4   1   23.40   11.40
  -4  -4   1   23.10   11.80
  -4  -4   1   10.70   20.40
   3   4  -1  167.88   22.40
   3   4  -1  193.98   21.70
   3   4  -1  168.58   19.90
   3   4  -1  180.98   20.60
   3   4  -1  193.68   26.40
   3   4  -1  140.49   26.90
   3   4  -1  195.58   24.70
   3   4  -1  190.98   20.00
   3   4  -1  167.48   22.80
   3   4  -1  168.78   27.40
  -3  -4   1  156.88   28.60
  -3  -4   1  167.98   22.30
  -3  -4   1  170.58   27.10
  -3  -4   1  162.38   22.30
  -3  -4   1  168.48   18.60
  -3  -4   1  162.08   18.30
  -3  -4   1  165.58   19.00
  -3  -4   1  152.38   20.10
   2   4  -1  105.39   17.80
   2   4  -1  126.29   16.00
   2   4  -1  121.09   18.60
   2   4  -1  107.99   14.90
   2   4  -1  103.29   24.00
   2   4  -1   93.29   21.60
   2   4  -1  102.09   14.80
   2   4  -1  141.39   16.90
  -2  -4   1  128.09   17.30
  -2  -4   1   70.69   20.30
  -2  -4   1  110.79   19.20
  -2  -4   1   64.59   21.60
  -2  -4   1  109.79   13.30
  -2  -4   1   93.89   13.70
   1   4  -1  500.45   42.70
   1   4  -1  537.25   32.90
   1   4  -1  519.35   34.20
   1   4  -1  492.85   37.20
   1   4  -1  478.75   32.50
   1   4  -1  474.25   31.50
   1   4  -1  547.65   29.50
   1   4  -1  464.55   41.10
   1   4  -1  533.45   37.10
  -1  -4   1  512.15   40.90
  -1  -4   1  447.96   35.30
  -1  -4   1  528.55   31.80
  -1  -4   1  481.15   38.30
  -1  -4   1  429.66   35.40
  -1  -4   1  487.15   31.00
  -1  -4   1  564.04   33.70
  -1  -4   1  496.15   43.60
   0   4  -1 1484.45   81.99
   0   4  -1 1506.75   96.59
   0   4  -1 1470.85   80.09
   0   4  -1 1478.55   83.79
   0   4  -1 1587.34   84.29
   0   4  -1 1569.44   89.19
   0   4  -1 1679.23   82.99
   0   4  -1 1564.84   91.19
   0   4  -1 1577.64   85.49
   0   4  -1 1540.65   88.49
   0  -4   1 1723.83   90.09
   0  -4   1 1589.14   85.19
   0  -4   1 1458.45   81.79
   0  -4   1 1449.65   87.39
   0  -4   1 1575.74   83.09
   0  -4   1 1604.34   82.99
  -1   4  -1 1295.37   72.29
  -1   4  -1 1276.77   78.29
  -1   4  -1 1277.07   68.89
  -1   4  -1 1312.77   78.69
  -1   4  -1 1336.27   74.49
  -1   4  -1 1364.46   73.09
   1  -4   1 1364.76   71.89
   1  -4   1 1325.97   85.89
   1  -4   1 1148.09   65.99
   1  -4   1 1237.28   68.59
   1  -4   1 1274.37   73.79
   1  -4   1 1244.28   77.69
   1  -4   1 1379.06   79.29
   1  -4   1 1423.76   78.29
   1  -4   1 1210.88   72.29
  -2   4  -1  124.89   21.20
  -2   4  -1  119.89   18.50
  -2   4  -1  150.08   19.00
  -2   4  -1  156.48   19.80
  -2   4  -1  114.49   21.60
  -2   4  -1  148.29   25.20
   2  -4   1  154.78   23.40
   2  -4   1  119.89   24.70
   2  -4   1  175.98   20.40
   2  -4   1  114.69   13.80
   2  -4   1  129.49   26.90
   2  -4   1  142.99   19.10
   2  -4   1  146.29   23.30
   2  -4   1   85.59   17.70
  -3   4  -1   51.39   15.10
  -3   4  -1   34.60   15.90
  -3   4  -1   33.60   15.70
  -3   4  -1   39.00   20.90
  -3   4  -1   55.09   14.70
  -3   4  -1   49.50   15.20
  -3   4  -1   42.50   24.40
  -3   4  -1   35.10   18.10
   3  -4   1   80.49   15.90
   3  -4   1    6.00   12.90
   3  -4   1   46.20   18.70
   3  -4   1   34.90   16.40
   3  -4   1   45.00   20.10
   3  -4   1   43.30   16.20
   3  -4   1   51.19   20.00
  -4   4  -1  879.01   57.29
  -4   4  -1  900.51   60.59
  -4   4  -1  861.31   65.79
  -4   4  -1  833.62   55.19
  -4   4  -1  715.23   60.99
  -4   4  -1  796.42   56.89
  -4   4  -1  737.33   61.89
  -4   4  -1  923.51   57.99
   4  -4   1  811.02   62.49
   4  -4   1  752.82   58.19
   4  -4   1  831.62   59.19
   4  -4   1  877.71   56.59
   4  -4   1  899.51   56.59
   4  -4   1  837.92   65.19
   4  -4   1  943.21   64.09
  -5   4  -1  834.12   58.59
  -5   4  -1  723.03   59.89
  -5   4  -1  777.22   54.89
  -5   4  -1  718.83   60.89
  -5   4  -1  687.93   53.89
  -5   4  -1  668.63   59.19
  -5   4  -1  781.12   55.39
  -5   4  -1  735.93   51.79
   5  -4   1  632.14   60.49
   5  -4   1  711.43   56.99
   5  -4   1  734.13   59.09
   5  -4   1  848.12   55.09
   5  -4   1  720.53   53.29
   5  -4   1  719.23   61.09
   5  -4   1  799.22   57.29
  -6   4  -1   -0.80   24.00
  -6   4  -1   11.80   16.30
  -6   4  -1   -5.10   18.00
  -6   4  -1    0.80   14.70
  -6   4  -1   -0.40   15.20
  -6   4  -1  -21.60   13.90
  -6   4  -1  -18.00   18.90
   6  -4   1  -12.30   15.40
   6  -4   1   19.20   20.30
   6  -4   1   -7.30   14.80
   6  -4   1    5.80   25.10
   6  -4   1   -2.90   14.10
   6  -4   1    4.40   18.50
  -7   4  -1  251.97   43.10
  -7   4  -1  195.08   30.00
  -7   4  -1  212.88   34.80
  -7   4  -1  294.37   45.30
  -7   4  -1  200.38   38.00
  -7   4  -1  170.08   30.30
  -7   4  -1  205.38   29.50
  -7   4  -1  185.18   24.60
  -7   4  -1  192.28   36.20
   7  -4   1  158.48   37.00
   7  -4   1  134.99   41.50
   7  -4   1  201.18   35.20
   7  -4   1  170.38   29.90
   7  -4   1  236.68   33.10
   7  -4   1  169.08   28.20
   7  -4   1  197.48   25.60
   7  -4   1  203.58   41.70
  -8   4  -1    5.60   36.60
  -8   4  -1    1.50   18.90
  -8   4  -1  -11.70   18.10
  -8   4  -1   67.19   30.80
  -8   4  -1    5.40   19.60
  -8   4  -1  -26.90   20.00
  -8   4  -1   43.30   33.30
  -8   4  -1   -1.20   15.00
   8  -4   1   -2.00   15.70
   8  -4   1  -31.30   19.90
   8  -4   1  -31.90   20.00
   8  -4   1    2.10   25.90
   8  -4   1    7.00   24.80
   8  -4   1   -2.40   17.60
   8  -4   1  -12.10   31.50
   8  -4   1   31.10   18.90
   8  -4   1  -20.20   19.30
  -9   4  -1   -9.10   19.40
  -9   4  -1    9.00   30.50
  -9   4  -1   41.20   30.60
  -9   4  -1   -9.90   16.60
  -9   4  -1   35.80   22.30
  -9   4  -1    5.40   22.80
   9  -4   1   43.40   25.80
   9  -4   1    3.90   33.90
   9  -4   1   -5.60   29.00
   9  -4   1  -13.20   18.60
   9  -4   1  -48.10   35.00
   9  -4   1   -1.60   26.60
   9  -4   1  -12.60   17.80
 -10   4  -1  144.39   38.60
 -10   4  -1   59.29   29.40
 -10   4  -1   88.89   23.80
 -10   4  -1   48.30   27.50
 -10   4  -1  144.09   44.30
  10  -4   1   67.59   26.80
  10  -4   1  147.69   60.69
  10  -4   1  165.58   48.90
  10  -4   1   86.99   38.70
  10  -4   1   59.39   26.80
  10  -4   1   75.79   36.20
  10  -4   1   85.09   30.60
 -11   4  -1  100.99   44.80
 -11   4  -1   57.79   60.79
 -11   4  -1   95.09   27.00
 -11   4  -1  112.29   31.60
  11  -4   1   97.89   33.60
  11  -4   1  117.49   39.60
  11  -4   1  149.99   52.79
  11  -4   1   98.09   39.00
  11  -4   1  113.79   31.70
  11  -4   1  124.49   37.50
 -12   4  -1   19.20   29.90
 -12   4  -1   23.00   34.70
 -12   4  -1   57.59   30.60
 -12   4  -1   43.70   28.60
  12  -4   1   48.80   47.60
  12  -4   1   65.09   34.70
  12  -4   1   15.10   40.90
  12  -4   1   57.49   39.80
  12  -4   1  114.59   40.40
 -13   4  -1   -6.10   30.10
 -13   4  -1   96.09   51.79
 -13   4  -1  -13.70   37.30
  13  -4   1   33.20   35.80
  13  -4   1   44.30   39.40
  13  -4   1    6.20   51.39
  13  -4   1   37.20   32.30
  13  -4   1   84.09   57.79
 -14   4  -1   51.09   43.70
 -14   4  -1   12.50   38.90
 -14   4  -1  -11.40   47.20
  14  -4   1   57.39   38.10
  14  -4   1   -7.20   32.30
  14   3  -1   72.99   36.90
  14   3  -1   50.19   37.70
  14   3  -1   48.70   34.20
 -14  -3   1  111.29   63.39
 -14  -3   1   21.60   46.90
 -14  -3   1   46.50   40.90
 -14  -3   1  167.38   57.89
  13   3  -1  137.59   47.60
  13   3  -1   79.09   32.50
  13   3  -1   70.79   41.50
  13   3  -1   11.10   34.70
  13   3  -1   20.20   31.70
 -13  -3   1   -2.60   32.20
 -13  -3   1   66.79   37.60
 -13  -3   1  -29.60   41.20
 -13  -3   1   -7.80   49.20
  12   3  -1  159.58   48.50
  12   3  -1  237.58   49.30
  12   3  -1  191.78   41.10
  12   3  -1  256.87   49.50
  12   3  -1  189.28   41.20
 -12  -3   1  217.48   44.30
 -12  -3   1  279.27   54.29
 -12  -3   1  206.28   41.10
 -12  -3   1  284.27   62.19
  11   3  -1  229.78   43.30
  11   3  -1  241.08   52.29
  11   3  -1  239.88   42.40
  11   3  -1  217.18   54.69
  11   3  -1  314.37   51.99
 -11  -3   1  275.07   42.40
 -11  -3   1  154.28   35.90
 -11  -3   1  183.48   54.69
 -11  -3   1  215.48   43.10
  10   3  -1    2.00   24.00
  10   3  -1  -27.60   21.80
  10   3  -1  -49.20   22.60
  10   3  -1   54.49   33.20
  10   3  -1   -2.10   28.90
  10   3  -1   32.40   24.00
 -10  -3   1  -15.40   21.00
 -10  -3   1   27.30   28.30
 -10  -3   1   53.99   32.90
 -10  -3   1  -13.20   33.30
 -10  -3   1   42.10   43.40
 -10  -3   1    6.90   21.30
   9   3  -1  117.39   29.30
   9   3  -1   89.99   26.10
   9   3  -1   89.89   24.80
   9   3  -1  105.09   27.40
   9   3  -1   93.09   28.10
   9   3  -1   57.39   24.80
   9   3  -1  117.49   33.40
   9   3  -1  182.68   37.80
  -9  -3   1  150.38   25.70
  -9  -3   1  105.29   32.30
  -9  -3   1   99.59   26.00
  -9  -3   1   77.99   27.40
  -9  -3   1   80.99   38.30
  -9  -3   1  120.49   33.20
   8   3  -1  103.39   29.10
   8   3  -1    8.50   18.20
   8   3  -1   28.50   19.20
   8   3  -1   30.10   18.50
   8   3  -1   38.70   19.90
   8   3  -1   18.70   19.20
   8   3  -1   13.80   22.70
  -8  -3   1   51.69   23.40
  -8  -3   1    8.90   37.20
  -8  -3   1    8.40   17.20
  -8  -3   1   54.39   24.90
  -8  -3   1   12.80   17.80
  -8  -3   1   53.09   17.80
  -8  -3   1   41.10   31.20
  -8  -3   1   47.70   25.60
  -8  -3   1    0.90   13.80
   7   3  -1  162.48   27.60
   7   3  -1  206.28   28.60
   7   3  -1  142.79   30.90
   7   3  -1  213.68   34.60
   7   3  -1  185.18   27.50
   7   3  -1  185.68   29.70
   7   3  -1  183.38   27.60
   7   3  -1  209.28   29.30
   7   3  -1  161.38   26.20
  -7  -3   1  154.08   30.50
  -7  -3   1  193.58   28.10
  -7  -3   1  146.79   25.30
  -7  -3   1  184.98   23.40
  -7  -3   1  160.18   36.60
  -7  -3   1  203.28   33.10
  -7  -3   1  192.78   29.50
   6   3  -1  232.28   29.70
   6   3  -1  271.07   33.30
   6   3  -1  205.68   27.30
   6   3  -1  244.88   30.80
   6   3  -1  315.97   43.00
   6   3  -1  274.67   46.90
   6   3  -1  287.07   35.20
  -6  -3   1  260.57   28.10
  -6  -3   1  297.77   36.60
  -6  -3   1  272.07   41.60
  -6  -3   1  213.68   28.30
  -6  -3   1  299.57   36.40
  -6  -3   1  213.18   26.10
  -6  -3   1  226.98   29.90
  -6  -3   1  261.17   34.50
  -6  -3   1  232.18   27.00
   5   3  -1 1394.16   90.99
   5   3  -1 1457.75   89.89
   5   3  -1 1472.65   88.09
   5   3  -1 1542.15   91.39
   5   3  -1 1609.74  100.29
   5   3  -1 1562.14   88.39
   5   3  -1 1546.35   87.99
   5   3  -1 1611.54   93.29
   5   3  -1 1458.95   88.29
  -5  -3   1 1491.35   91.19
  -5  -3   1 1657.43   94.79
  -5  -3   1 1360.46   90.69
  -5  -3   1 1664.53  102.19
  -5  -3   1 1607.64   88.09
  -5  -3   1 1588.34   92.69
  -5  -3   1 1613.74   98.99
  -5  -3   1 1541.15   87.19
  -5  -3   1 1504.95   87.19
  -5  -3   1 1545.15   83.89
   4   3  -1  620.64   39.20
   4   3  -1  564.24   38.60
   4   3  -1  576.04   43.00
   4   3  -1  525.35   38.40
   4   3  -1  549.25   42.90
   4   3  -1  530.25   41.50
   4   3  -1  513.65   40.20
   4   3  -1  599.24   49.99
   4   3  -1  558.14   38.40
  -4  -3   1  583.24   49.40
  -4  -3   1  522.85   38.10
  -4  -3   1  455.35   40.30
  -4  -3   1  541.45   36.90
  -4  -3   1  563.04   34.10
  -4  -3   1  603.94   46.90
  -4  -3   1  494.55   41.00
  -4  -3   1  679.53   51.79
  -4  -3   1  542.75   38.10
  -4  -3   1  535.35   37.10
   3   3  -1 4690.23  228.58
   3   3  -1 4696.23  228.88
   3   3  -1 4516.45  229.08
   3   3  -1 4202.78  230.88
   3   3  -1 4533.35  236.08
   3   3  -1 4152.18  230.68
   3   3  -1 4699.33  233.38
   3   3  -1 4293.87  228.68
   3   3  -1 4266.87  230.88
  -3  -3   1 4528.95  227.78
  -3  -3   1 4408.46  233.68
  -3  -3   1 4505.95  233.78
  -3  -3   1 4043.40  227.98
  -3  -3   1 4488.35  228.08
  -3  -3   1 4562.74  228.58
  -3  -3   1 4754.32  223.78
  -3  -3   1 4677.73  236.78
  -3  -3   1 4148.69  230.88
  -3  -3   1 4300.17  234.48
   2   3  -1 2870.11  144.99
   2   3  -1 2677.23  139.59
   2   3  -1 2521.85  138.89
   2   3  -1 2937.01  139.39
   2   3  -1 2561.14  141.29
   2   3  -1 2538.45  141.19
   2   3  -1 2772.22  146.29
   2   3  -1 2738.43  139.29
  -2  -3   1 2672.03  144.89
  -2  -3   1 2537.65  138.59
  -2  -3   1 2745.63  146.49
  -2  -3   1 2620.54  141.59
  -2  -3   1 2869.01  138.59
  -2  -3   1 2614.44  141.09
  -2  -3   1 2689.13  139.39
  -2  -3   1 2489.25  138.89
   1   3  -1  604.74   39.00
   1   3  -1  646.94   33.10
   1   3  -1  565.04   35.80
   1   3  -1  665.33   36.80
   1   3  -1  548.35   39.50
   1   3  -1  618.24   36.40
   1   3  -1  618.04   37.60
   1   3  -1  586.34   45.20
   1   3  -1  545.95   43.00
  -1  -3   1  648.74   33.30
  -1  -3   1  626.24   45.10
  -1  -3   1  598.44   40.80
  -1  -3   1  576.54   44.60
  -1  -3   1  669.33   36.00
  -1  -3   1  605.24   35.70
  -1  -3   1  599.34   36.80
  -1  -3   1  584.44   39.00
  -1  -3   1  648.94   37.40
   0   3  -1  117.19   13.70
   0   3  -1  113.99   20.60
   0   3  -1  133.49   18.90
   0   3  -1  110.19   18.30
   0   3  -1  120.39   14.10
   0   3  -1   94.49   10.70
   0   3  -1  105.89   11.50
   0   3  -1  128.89   16.10
   0   3  -1   99.99   18.50
   0   3  -1  119.99   14.80
   0  -3   1  100.69   11.20
   0  -3   1  106.49   12.50
   0  -3   1  125.09   14.70
   0  -3   1  102.99   19.10
   0  -3   1  127.49   17.90
   0  -3   1  123.69   13.60
   0  -3   1  137.09   20.40
   0  -3   1  114.79   14.80
  -1   3  -1 1138.59   63.99
  -1   3  -1 1148.19   62.39
  -1   3  -1 1119.99   67.79
  -1   3  -1 1059.19   61.89
  -1   3  -1 1123.19   62.69
  -1   3  -1 1058.19   59.19
  -1   3  -1 1161.48   65.99
  -1   3  -1 1110.29   67.79
   1  -3   1 1148.39   63.69
   1  -3   1 1084.19   59.29
   1  -3   1 1133.99   67.29
   1  -3   1 1101.19   73.49
   1  -3   1 1115.39   61.79
   1  -3   1 1197.38   63.19
   1  -3   1  990.70   65.49
   1  -3   1 1193.78   67.89
  -2   3  -1   11.40   14.50
  -2   3  -1   11.40   11.70
  -2   3  -1   32.40   10.90
  -2   3  -1   25.00   11.70
  -2   3  -1   21.90   10.90
  -2   3  -1   22.70   16.60
  -2   3  -1   37.60   16.70
   2  -3   1    4.70   14.30
   2  -3   1    8.50   15.10
   2  -3   1   -9.00   14.40
   2  -3   1   18.20   11.70
   2  -3   1   15.30    9.40
   2  -3   1    5.00   11.10
   2  -3   1   12.70   10.70
  -3   3  -1  557.64   40.40
  -3   3  -1  567.34   44.20
  -3   3  -1  567.04   38.30
  -3   3  -1  646.24   48.90
  -3   3  -1  550.04   46.50
  -3   3  -1  549.65   45.10
  -3   3  -1  557.74   40.10
  -3   3  -1  570.74   43.00
   3  -3   1  592.04   39.90
   3  -3   1  490.35   45.20
   3  -3   1  621.54   45.80
   3  -3   1  592.54   42.90
   3  -3   1  609.94   43.00
   3  -3   1  561.94   41.90
  -4   3  -1  693.93   48.10
  -4   3  -1  619.44   48.20
  -4   3  -1  682.83   53.39
  -4   3  -1  689.33   46.70
  -4   3  -1  639.34   54.59
  -4   3  -1  774.02   51.59
  -4   3  -1  664.63   45.60
  -4   3  -1  640.54   53.19
   4  -3   1  618.64   55.09
   4  -3   1  697.23   47.00
   4  -3   1  692.23   52.49
   4  -3   1  704.03   47.30
   4  -3   1  715.33   50.59
   4  -3   1  678.43   53.89
   4  -3   1  764.72   50.79
  -5   3  -1  117.39   24.40
  -5   3  -1  153.78   22.40
  -5   3  -1  210.78   34.00
  -5   3  -1  169.28   30.30
  -5   3  -1  145.69   22.50
  -5   3  -1  133.89   23.60
  -5   3  -1  129.19   25.90
  -5   3  -1  144.09   26.30
   5  -3   1  158.58   30.60
   5  -3   1  134.49   31.80
   5  -3   1   97.09   24.40
   5  -3   1  125.19   26.60
   5  -3   1  151.08   22.70
   5  -3   1  150.08   25.00
   5  -3   1  115.89   24.80
  -6   3  -1  191.38   22.60
  -6   3  -1  126.39   28.40
  -6   3  -1  180.88   34.60
  -6   3  -1  180.88   26.00
  -6   3  -1  169.68   24.30
  -6   3  -1  160.48   26.90
  -6   3  -1  257.37   39.30
  -6   3  -1  182.08   29.80
   6  -3   1  198.88   30.30
   6  -3   1  190.18   37.20
   6  -3   1  174.08   36.50
   6  -3   1  162.48   26.30
   6  -3   1  166.58   22.40
   6  -3   1  151.38   24.10
   6  -3   1  194.78   28.50
   6  -3   1   86.29   47.50
  -7   3  -1   30.30   16.70
  -7   3  -1   20.20   19.10
  -7   3  -1   21.40   21.40
  -7   3  -1   18.80   24.20
  -7   3  -1   16.00   18.80
  -7   3  -1   40.30   18.80
  -7   3  -1    6.70   24.60
  -7   3  -1   17.60   19.30
   7  -3   1    9.40   21.70
   7  -3   1   30.50   20.80
   7  -3   1   24.10   22.30
   7  -3   1   18.90   22.30
   7  -3   1   32.20   24.80
   7  -3   1   14.40   24.00
   7  -3   1   18.30   16.80
   7  -3   1   17.10   15.40
   7  -3   1   40.30   29.60
  -8   3  -1   13.20   23.30
  -8   3  -1   -4.90   18.20
  -8   3  -1   18.10   21.40
  -8   3  -1   63.19   28.70
  -8   3  -1   49.00   29.50
  -8   3  -1   36.10   18.40
  -8   3  -1   26.70   18.20
  -8   3  -1   46.60   23.00
  -8   3  -1   14.20   27.00
   8  -3   1   65.29   30.40
   8  -3   1  -10.70   18.00
   8  -3   1   90.29   21.80
   8  -3   1   38.00   27.00
   8  -3   1  -15.90   20.90
   8  -3   1   28.40   19.50
   8  -3   1   28.50   22.20
   8  -3   1    0.50   29.10
   8  -3   1   42.70   22.50
  -9   3  -1  195.58   37.00
  -9   3  -1  283.67   39.70
  -9   3  -1  322.77   36.00
  -9   3  -1  254.57   40.70
  -9   3  -1  280.07   47.80
  -9   3  -1  199.48   33.80
   9  -3   1  258.97   44.20
   9  -3   1  269.17   41.90
   9  -3   1  283.87   36.10
   9  -3   1  200.18   40.20
   9  -3   1  240.68   47.80
   9  -3   1  309.07   60.69
   9  -3   1  257.47   46.40
 -10   3  -1  116.39   26.70
 -10   3  -1   86.09   32.60
 -10   3  -1  130.99   41.40
 -10   3  -1  113.19   28.50
  10  -3   1   66.19   31.50
  10  -3   1   86.79   28.00
  10  -3   1  117.29   35.00
  10  -3   1  116.39   28.90
  10  -3   1  121.09   34.90
  10  -3   1   60.59   37.40
  10  -3   1  162.08   45.60
 -11   3  -1  200.68   35.70
 -11   3  -1  253.77   52.79
 -11   3  -1   65.49   36.30
 -11   3  -1  154.48   37.30
 -11   3  -1  145.19   34.90
  11  -3   1  169.18   42.20
  11  -3   1   86.09   42.20
  11  -3   1  166.18   34.40
  11  -3   1  121.09   49.80
  11  -3   1  159.48   74.39
  11  -3   1  112.99   41.50
  11  -3   1  191.58   37.70
 -12   3  -1   82.99   45.70
 -12   3  -1   70.79   44.00
 -12   3  -1  104.99   31.80
 -12   3  -1   76.79   32.00
  12  -3   1   15.90   40.80
  12  -3   1   58.29   44.70
  12  -3   1   24.10   27.50
  12  -3   1   44.70   38.10
  12  -3   1   19.50   38.80
  12  -3   1   69.39   38.40
 -13   3  -1   10.70   30.10
 -13   3  -1  -19.10   33.10
 -13   3  -1  -16.50   38.60
  13  -3   1   43.50   43.80
  13  -3   1   68.09   37.70
  13  -3   1  -38.50   38.20
  13  -3   1   13.10   30.60
 -14   3  -1   26.70   39.10
 -14   3  -1  -24.20   32.90
 -14   3  -1  -36.40   46.20
 -14   3  -1  -25.90   51.09
  14  -3   1   -1.80   32.40
  14  -3   1    4.00   38.00
  14  -3   1  -57.99   47.40
  14  -3   1  -18.60   30.50
  14   2  -1  -21.10   29.80
  14   2  -1  -13.20   33.30
  14   2  -1  -40.40   65.49
  14   2  -1   19.90   35.40
 -14  -2   1   -1.20   35.70
 -14  -2   1  -53.29   53.39
 -14  -2   1    1.00   57.59
  13   2  -1  -80.59   38.70
  13   2  -1  -50.39   36.40
  13   2  -1   32.20   33.60
  13   2  -1  -37.50   27.60
  13   2  -1   79.49   38.10
 -13  -2   1  -12.00   38.20
 -13  -2   1   28.20   33.60
 -13  -2   1  -15.00   72.89
 -13  -2   1    3.60   32.20
  12   2  -1   31.10   33.10
  12   2  -1   51.59   35.90
  12   2  -1   47.00   40.40
  12   2  -1   16.10   35.70
  12   2  -1  106.39   36.70
 -12  -2   1  109.99   32.80
 -12  -2   1   37.80   31.60
 -12  -2   1   54.99   39.20
 -12  -2   1  184.38   52.39
  11   2  -1  165.08   37.20
  11   2  -1   95.29   32.90
  11   2  -1  101.39   30.50
  11   2  -1  133.29   37.30
  11   2  -1  129.69   43.30
  11   2  -1  -14.40   40.10
  11   2  -1   98.79   33.30
 -11  -2   1   38.40   44.20
 -11  -2   1   67.99   34.00
 -11  -2   1   85.39   32.20
 -11  -2   1   76.89   31.60
 -11  -2   1  101.39   32.80
  10   2  -1   18.60   25.60
  10   2  -1   23.60   23.30
  10   2  -1   -4.80   21.00
  10   2  -1   68.19   29.10
  10   2  -1   26.00   44.70
  10   2  -1   37.10   25.90
  10   2  -1   35.40   25.20
  10   2  -1   18.20   28.20
 -10  -2   1  -26.40   28.50
 -10  -2   1   62.19   26.30
 -10  -2   1   33.40   33.60
 -10  -2   1   27.20   30.90
 -10  -2   1   -0.10   37.70
   9   2  -1   14.00   20.30
   9   2  -1  -15.00   18.80
   9   2  -1  -15.80   37.90
   9   2  -1  -13.50   25.20
   9   2  -1  -15.20   16.20
   9   2  -1   37.20   30.20
   9   2  -1  -20.20   20.30
   9   2  -1   -6.50   18.60
  -9  -2   1  -21.20   15.90
  -9  -2   1   18.30   22.40
  -9  -2   1  -18.00   17.10
   8   2  -1   -0.90   16.10
   8   2  -1   -9.20   22.10
   8   2  -1   -0.70   14.80
   8   2  -1   -4.20   17.50
   8   2  -1  -40.40   16.10
   8   2  -1  -24.30   27.90
   8   2  -1    4.80   20.30
   8   2  -1  -10.50   15.30
  -8  -2   1  -10.50   13.40
  -8  -2   1   20.80   22.10
  -8  -2   1   -2.10   20.10
  -8  -2   1   29.30   24.00
  -8  -2   1  -42.40   22.80
  -8  -2   1   12.30   16.60
  -8  -2   1  -16.60   15.50
  -8  -2   1  -27.60   17.80
   7   2  -1   80.49   21.70
   7   2  -1   96.29   27.70
   7   2  -1   63.59   19.50
   7   2  -1   88.39   19.80
   7   2  -1   63.89   19.20
   7   2  -1   79.39   19.40
   7   2  -1   80.19   26.60
   7   2  -1   61.19   20.20
   7   2  -1   38.70   19.10
   7   2  -1   91.89   21.20
  -7  -2   1   72.39   16.40
  -7  -2   1   58.69   22.20
  -7  -2   1   56.69   21.60
  -7  -2   1   39.60   17.80
  -7  -2   1   96.79   31.00
  -7  -2   1   39.00   17.20
  -7  -2   1   58.09   18.00
  -7  -2   1   64.39   21.00
  -7  -2   1   66.99   24.90
   6   2  -1  547.35   41.60
   6   2  -1  541.05   39.60
   6   2  -1  459.25   38.80
   6   2  -1  573.14   43.60
   6   2  -1  506.55   39.20
   6   2  -1  450.75   44.30
   6   2  -1  496.15   42.00
   6   2  -1  471.15   39.10
   6   2  -1  471.35   49.90
   6   2  -1  482.65   41.60
  -6  -2   1  510.65   41.80
  -6  -2   1  505.75   44.90
  -6  -2   1  570.24   54.99
  -6  -2   1  545.65   45.30
  -6  -2   1  486.25   39.10
  -6  -2   1  437.76   38.40
  -6  -2   1  477.45   37.70
  -6  -2   1  502.95   46.30
  -6  -2   1  551.94   39.70
   5   2  -1   36.70   14.20
   5   2  -1   -7.40   14.40
   5   2  -1   40.60   17.80
   5   2  -1   19.80   13.60
   5   2  -1   21.50   12.30
   5   2  -1   32.00   12.90
   5   2  -1   42.30   14.10
   5   2  -1    5.40   12.20
   5   2  -1    3.90   11.80
  -5  -2   1   16.60   15.40
  -5  -2   1   54.99   23.20
  -5  -2   1   47.70   12.80
  -5  -2   1   19.00   11.50
  -5  -2   1   24.20   16.60
  -5  -2   1   27.40   13.30
  -5  -2   1   21.10   16.10
  -5  -2   1   34.10   12.50
  -5  -2   1   17.50   11.70
   4   2  -1  832.32   50.19
   4   2  -1  853.41   54.09
   4   2  -1  791.82   52.19
   4   2  -1  809.32   51.19
   4   2  -1  801.22   54.59
   4   2  -1  966.70   63.89
   4   2  -1  825.62   51.19
   4   2  -1  815.72   51.39
  -4  -2   1  827.42   50.29
  -4  -2   1  824.32   55.29
  -4  -2   1  802.52   54.29
  -4  -2   1  831.72   49.60
  -4  -2   1  721.93   53.59
  -4  -2   1  791.72   60.99
  -4  -2   1  821.42   51.29
  -4  -2   1  886.51   48.70
   3   2  -1  270.77   22.20
   3   2  -1  219.48   21.00
   3   2  -1  245.98   21.80
   3   2  -1  284.97   27.10
   3   2  -1  278.77   25.80
   3   2  -1  222.98   24.20
   3   2  -1  270.37   32.10
   3   2  -1  226.58   25.30
   3   2  -1  242.48   21.10
  -3  -2   1  242.98   21.20
  -3  -2   1  229.98   24.40
  -3  -2   1  285.47   19.50
  -3  -2   1  249.58   27.70
  -3  -2   1  223.48   24.50
  -3  -2   1  244.88   20.70
  -3  -2   1  306.97   33.60
  -3  -2   1  259.47   21.80
  -3  -2   1  242.68   20.90
   2   2  -1 1024.20   61.19
   2   2  -1 1143.89   61.29
   2   2  -1 1151.98   68.19
   2   2  -1 1122.69   61.09
   2   2  -1 1048.50   63.29
   2   2  -1 1153.68   65.29
   2   2  -1 1146.79   61.69
   2   2  -1 1091.09   63.59
  -2  -2   1 1172.28   68.59
  -2  -2   1 1145.99   67.09
  -2  -2   1 1191.08   61.19
  -2  -2   1 1077.59   61.29
  -2  -2   1 1075.99   63.29
  -2  -2   1 1113.99   61.19
  -2  -2   1 1080.69   63.69
  -2  -2   1 1163.28   65.89
  -2  -2   1 1166.28   60.99
  -2  -2   1 1095.39   57.89
   1   2  -1 2571.84  131.29
   1   2  -1 2332.07  127.59
   1   2  -1 2357.06  127.69
   1   2  -1 2735.43  130.39
   1   2  -1 2555.94  126.09
   1   2  -1 2398.06  125.99
   1   2  -1 2388.86  126.39
   1   2  -1 2420.56  125.79
   1   2  -1 2415.06  129.29
  -1  -2   1 2448.46  125.69
  -1  -2   1 2443.66  126.09
  -1  -2   1 2502.05  130.79
  -1  -2   1 2260.17  127.29
  -1  -2   1 2274.97  125.49
  -1  -2   1 2703.63  123.39
  -1  -2   1 2539.95  130.59
  -1  -2   1 2427.76  126.29
   0   2  -1   19.20    7.50
   0   2  -1   27.60   10.20
   0   2  -1   43.80   12.70
   0   2  -1   21.70    6.20
   0   2  -1   25.90    6.30
   0   2  -1   14.20    9.40
   0   2  -1   23.40   10.00
   0   2  -1   17.70    5.20
   0   2  -1   15.20    5.90
   0  -2   1   21.70   11.70
   0  -2   1   29.30    9.30
   0  -2   1   21.00    6.20
   0  -2   1   15.40    6.30
   0  -2   1   21.00    5.30
   0  -2   1   13.30    6.20
  -1   2  -1 1484.65   86.89
  -1   2  -1 1730.83   84.59
  -1   2  -1 1543.75   84.69
  -1   2  -1 1727.13   88.39
  -1   2  -1 1598.14   83.69
  -1   2  -1 1440.76   85.59
  -1   2  -1 1684.43   84.39
   1  -2   1 1640.44   87.89
   1  -2   1 1472.05   86.39
   1  -2   1 1520.65   81.79
   1  -2   1 1752.62   88.39
   1  -2   1 1660.03   84.09
   1  -2   1 1544.45   84.29
   1  -2   1 1488.85   84.59
  -2   2  -1 3354.66  177.88
  -2   2  -1 3411.96  177.48
  -2   2  -1 3622.04  182.18
  -2   2  -1 3545.25  181.38
  -2   2  -1 3253.57  177.88
  -2   2  -1 3630.14  179.58
  -2   2  -1 3358.36  176.88
  -2   2  -1 3407.56  180.98
   2  -2   1 3099.09  180.58
   2  -2   1 3564.84  179.18
   2  -2   1 3678.43  177.78
   2  -2   1 3124.29  180.58
   2  -2   1 3392.86  177.68
   2  -2   1 3611.94  178.88
   2  -2   1 3635.54  181.48
  -3   2  -1  289.17   26.90
  -3   2  -1  245.98   26.80
  -3   2  -1  283.87   26.00
  -3   2  -1  328.87   33.10
  -3   2  -1  286.97   25.00
  -3   2  -1  292.57   32.60
  -3   2  -1  310.07   31.10
  -3   2  -1  275.27   23.20
   3  -2   1  262.97   25.10
   3  -2   1  267.67   25.00
   3  -2   1  286.17   31.10
   3  -2   1  279.77   24.30
   3  -2   1  242.28   27.50
   3  -2   1  290.07   32.80
   3  -2   1  292.47   31.30
   3  -2   1  301.67   28.20
  -4   2  -1  967.80   63.39
  -4   2  -1  978.00   55.59
  -4   2  -1  974.30   57.79
  -4   2  -1  853.31   61.09
  -4   2  -1  871.31   57.49
  -4   2  -1  926.11   62.29
  -4   2  -1  864.91   57.79
  -4   2  -1  880.01   55.19
   4  -2   1  885.61   62.39
   4  -2   1  961.60   57.19
   4  -2   1  855.11   54.49
   4  -2   1  953.00   61.49
   4  -2   1  954.10   59.69
   4  -2   1  904.41   59.69
   4  -2   1  948.71   57.49
  -5   2  -1    0.30   15.90
  -5   2  -1   21.80   14.80
  -5   2  -1   21.60   13.60
  -5   2  -1   -7.60   13.40
  -5   2  -1   20.30   10.70
  -5   2  -1   26.60   17.80
  -5   2  -1   13.20   12.20
  -5   2  -1    7.30   15.30
  -5   2  -1    9.50   11.80
   5  -2   1   22.70   14.60
   5  -2   1    0.10   14.70
   5  -2   1   21.70   17.90
   5  -2   1    5.50   11.60
   5  -2   1  -17.70   15.30
   5  -2   1   14.70   10.90
   5  -2   1   16.00   16.60
   5  -2   1    4.60   13.70
  -6   2  -1   21.20   12.60
  -6   2  -1   -4.90   14.80
  -6   2  -1   31.70   14.20
  -6   2  -1   35.60   15.70
  -6   2  -1    7.00   20.20
  -6   2  -1  -10.30   18.00
  -6   2  -1   35.50   13.40
  -6   2  -1  -19.10   15.10
  -6   2  -1   17.50   16.50
   6  -2   1    6.50   18.00
   6  -2   1   19.00   20.20
   6  -2   1    7.50   18.40
   6  -2   1   25.60   14.20
   6  -2   1   21.90   13.20
   6  -2   1   46.90   14.20
   6  -2   1    8.10   15.50
   6  -2   1   37.70   36.60
   6  -2   1   34.20   23.80
  -7   2  -1    4.10   15.70
  -7   2  -1   24.10   14.30
  -7   2  -1    4.40   17.60
  -7   2  -1   29.40   26.00
  -7   2  -1   -8.00   11.70
  -7   2  -1   30.60   24.30
  -7   2  -1   33.40   16.10
  -7   2  -1   16.30   21.10
  -7   2  -1   13.90   17.40
   7  -2   1   -7.10   25.50
   7  -2   1   15.60   17.80
   7  -2   1   16.50   24.20
   7  -2   1    2.10   13.20
   7  -2   1   10.60   15.30
   7  -2   1    7.10   13.60
   7  -2   1   -4.80   17.20
   7  -2   1   17.10   20.60
   7  -2   1   16.60   21.10
  -8   2  -1  315.47   48.40
  -8   2  -1  307.47   39.30
  -8   2  -1  376.46   35.30
  -8   2  -1  357.96   38.50
  -8   2  -1  254.37   45.50
  -8   2  -1  309.27   36.60
  -8   2  -1  272.37   43.90
  -8   2  -1  245.38   51.09
  -8   2  -1  280.57   42.60
   8  -2   1  301.57   35.20
   8  -2   1  296.77   38.50
   8  -2   1  237.48   39.40
   8  -2   1  304.47   33.60
   8  -2   1  276.77   44.00
   8  -2   1  304.37   43.00
   8  -2   1  294.87   48.00
   8  -2   1  325.37   38.90
   8  -2   1  301.97   49.60
  -9   2  -1 1526.05  106.49
  -9   2  -1 1542.75   94.09
  -9   2  -1 1419.16   92.79
  -9   2  -1 1642.64  101.39
  -9   2  -1 1289.07   97.29
  -9   2  -1 1435.96   92.29
  -9   2  -1 1601.64  100.79
   9  -2   1 1407.16   92.29
   9  -2   1 1340.97  101.79
   9  -2   1 1488.05  107.29
   9  -2   1 1630.54  101.39
   9  -2   1 1533.75  148.19
   9  -2   1 1370.46  102.79
   9  -2   1 1558.54  102.39
   9  -2   1 1553.04  101.09
 -10   2  -1   25.60   25.20
 -10   2  -1    6.80   24.80
 -10   2  -1    7.50   19.60
 -10   2  -1   17.60   30.00
 -10   2  -1   -5.80   19.60
  10  -2   1    3.80   26.10
  10  -2   1  -30.50   27.80
  10  -2   1   86.59   29.80
  10  -2   1    7.20   30.80
  10  -2   1   13.40   21.80
  10  -2   1   31.50   26.90
  10  -2   1   19.50   34.20
  10  -2   1   -5.20   19.30
 -11   2  -1   45.10   33.50
 -11   2  -1  -17.00   29.20
 -11   2  -1  -11.40   24.40
 -11   2  -1   90.89   26.00
  11  -2   1   18.80   30.70
  11  -2   1   24.20   24.60
  11  -2   1    5.90   27.40
  11  -2   1   22.40   30.60
  11  -2   1   28.10   30.00
 -12   2  -1   76.79   40.40
 -12   2  -1   50.09   26.30
 -12   2  -1   21.80   37.50
 -12   2  -1   76.59   31.70
  12  -2   1   40.80   45.60
  12  -2   1  123.19   61.89
  12  -2   1   48.30   31.90
  12  -2   1    7.00   33.80
 -13   2  -1    1.60   34.50
 -13   2  -1   21.80   47.40
 -13   2  -1   28.30   30.00
  13  -2   1   23.40   40.40
  13  -2   1  -55.09   42.50
  13  -2   1  -14.10   26.60
  13  -2   1   17.90   33.60
  13  -2   1    4.60   34.20
 -14   2  -1   37.40   41.80
 -14   2  -1  115.49   56.99
 -14   2  -1   30.60   36.50
 -14   2  -1   93.29   55.49
  14  -2   1   14.60   35.10
  14  -2   1   33.80   40.10
  14  -2   1  150.88   42.60
  14  -2   1   27.00   52.59
  14   1  -1   43.40   48.70
  14   1  -1   61.19   36.40
  14   1  -1   61.69   34.80
  14   1  -1  -39.40   32.50
 -14  -1   1   -7.30   34.90
 -14  -1   1  -64.59   49.10
 -14  -1   1  -16.50   45.00
 -14  -1   1    1.90   35.30
  13   1  -1  -46.10   38.90
  13   1  -1   16.70   33.70
  13   1  -1   -7.60   31.40
  13   1  -1  -17.00   28.40
  13   1  -1  -12.60   37.60
 -13  -1   1    6.40   57.79
 -13  -1   1   24.30   49.60
 -13  -1   1  -23.10   29.00
 -13  -1   1   20.10   40.40
  12   1  -1   61.59   38.50
  12   1  -1   56.09   41.30
  12   1  -1   13.00   29.40
  12   1  -1   -5.10   26.00
  12   1  -1   31.20   30.00
 -12  -1   1  103.99   47.80
 -12  -1   1   43.90   36.30
 -12  -1   1   38.30   28.40
 -12  -1   1   59.89   32.40
  11   1  -1  106.39   45.10
  11   1  -1   97.19   37.30
  11   1  -1   34.60   26.30
  11   1  -1  119.89   32.50
  11   1  -1  100.69   32.50
  11   1  -1  152.98   71.79
  11   1  -1   87.79   36.90
 -11  -1   1   73.79   45.00
 -11  -1   1  106.49   33.20
 -11  -1   1   54.49   35.20
 -11  -1   1  127.09   32.50
  10   1  -1   -5.60   23.70
  10   1  -1   -4.70   22.10
  10   1  -1  -19.50   35.50
  10   1  -1   27.20   22.50
  10   1  -1   -3.00   28.50
  10   1  -1   47.80   26.50
  10   1  -1   12.70   29.80
  10   1  -1   19.20   21.20
 -10  -1   1   -6.40   30.40
 -10  -1   1   29.10   22.70
 -10  -1   1   -0.90   35.20
 -10  -1   1   -2.70   21.90
 -10  -1   1   11.50   22.40
   9   1  -1  -34.50   16.50
   9   1  -1    1.00   18.00
   9   1  -1   -4.40   19.10
   9   1  -1    0.00   20.10
   9   1  -1   21.60   26.70
   9   1  -1  -15.30   20.40
   9   1  -1  -12.50   21.30
   9   1  -1  -22.50   27.40
   9   1  -1  -21.30   13.90
  -9  -1   1   17.50   19.70
  -9  -1   1    3.90   27.50
  -9  -1   1  -23.70   21.00
  -9  -1   1    5.60   20.00
  -9  -1   1   22.70   18.60
  -9  -1   1    6.80   18.00
  -9  -1   1   21.80   24.80
   8   1  -1  142.29   50.39
   8   1  -1  187.28   26.20
   8   1  -1  139.59   28.00
   8   1  -1  189.68   28.30
   8   1  -1  190.28   30.20
   8   1  -1  137.19   28.30
   8   1  -1  250.07   39.30
   8   1  -1  192.78   28.80
   8   1  -1  177.88   35.70
  -8  -1   1  202.38   35.70
  -8  -1   1  202.18   31.50
  -8  -1   1  168.68   41.70
  -8  -1   1  180.78   29.50
  -8  -1   1  160.68   33.50
  -8  -1   1  205.98   33.40
  -8  -1   1  199.48   28.10
  -8  -1   1  174.68   29.10
   7   1  -1   39.70   16.20
   7   1  -1   40.20   20.90
   7   1  -1   26.00   18.00
   7   1  -1   12.50   19.60
   7   1  -1   56.29   18.10
   7   1  -1    8.30   16.00
   7   1  -1   28.30   17.00
   7   1  -1   38.10   17.90
   7   1  -1   23.50   15.20
   7   1  -1   53.79   20.30
  -7  -1   1   41.50   18.70
  -7  -1   1   35.70   16.80
  -7  -1   1   36.80   15.10
  -7  -1   1   29.20   15.90
  -7  -1   1   63.59   20.70
  -7  -1   1   43.20   31.50
  -7  -1   1   27.20   17.30
  -7  -1   1   49.90   20.40
  -7  -1   1   27.10   20.60
   6   1  -1    5.90   17.40
   6   1  -1   -2.60   13.50
   6   1  -1   -4.40   13.20
   6   1  -1   23.10   13.80
   6   1  -1   13.80   18.60
   6   1  -1   -3.10   13.40
   6   1  -1   -5.70   10.80
   6   1  -1    2.30   12.90
   6   1  -1   -9.40   11.50
   6   1  -1    7.70   13.00
  -6  -1   1    5.30   21.20
  -6  -1   1   -3.30   14.80
  -6  -1   1  -21.10   11.60
  -6  -1   1   28.20   15.10
  -6  -1   1   -2.90   13.60
  -6  -1   1   17.80   11.60
  -6  -1   1   20.90   14.60
  -6  -1   1    6.00   18.20
  -6  -1   1   26.30   18.10
   5   1  -1   61.49   21.40
   5   1  -1   61.39   17.50
   5   1  -1   82.99   16.90
   5   1  -1   75.99   14.80
   5   1  -1   51.49   15.60
   5   1  -1   57.29   20.40
   5   1  -1   93.59   15.50
   5   1  -1   88.09   17.10
   5   1  -1   81.19   17.00
   5   1  -1   69.89   16.80
  -5  -1   1   94.49   18.00
  -5  -1   1  111.09   20.10
  -5  -1   1   91.49   25.90
  -5  -1   1   95.19   19.60
  -5  -1   1   83.79   19.80
  -5  -1   1   79.69   16.30
  -5  -1   1   71.49   14.90
  -5  -1   1   72.59   18.50
  -5  -1   1   60.89   16.80
   4   1  -1 2551.54  136.99
   4   1  -1 2652.33  138.79
   4   1  -1 2683.93  137.29
   4   1  -1 2627.44  139.29
   4   1  -1 2617.84  139.99
   4   1  -1 2507.75  141.89
   4   1  -1 2641.44  140.79
   4   1  -1 2556.04  142.19
  -4  -1   1 2730.83  141.69
  -4  -1   1 2806.62  148.09
  -4  -1   1 2451.35  141.39
  -4  -1   1 2549.44  140.29
  -4  -1   1 2590.34  137.09
  -4  -1   1 2803.02  143.39
  -4  -1   1 2539.55  136.69
  -4  -1   1 2447.56  141.39
   3   1  -1  438.56   29.70
   3   1  -1  414.66   31.10
   3   1  -1  425.76   32.90
   3   1  -1  410.96   28.80
   3   1  -1  411.56   29.50
   3   1  -1  423.36   28.00
   3   1  -1  423.36   29.30
   3   1  -1  476.15   28.90
  -3  -1   1  432.46   27.50
  -3  -1   1  371.76   32.00
  -3  -1   1  394.06   32.10
  -3  -1   1  387.06   28.90
  -3  -1   1  423.46   32.60
  -3  -1   1  405.56   28.50
  -3  -1   1  410.86   38.20
  -3  -1   1  460.35   28.50
  -3  -1   1  418.16   29.60
   2   1  -1  826.72   49.00
   2   1  -1  909.11   54.89
   2   1  -1  890.01   48.40
   2   1  -1  807.52   50.69
   2   1  -1  912.81   49.20
   2   1  -1  868.91   49.30
   2   1  -1  849.41   51.29
   2   1  -1  918.01   51.19
   2   1  -1  910.51   49.50
  -2  -1   1  870.41   49.00
  -2  -1   1  894.81   51.69
  -2  -1   1  813.72   50.99
  -2  -1   1  942.11   47.70
  -2  -1   1  885.61   48.00
  -2  -1   1  865.11   55.19
   1   1  -1  332.07   21.60
   1   1  -1  344.07   19.10
   1   1  -1  291.97   20.90
   1   1  -1  307.37   19.10
   1   1  -1  343.67   24.30
   1   1  -1  309.87   19.30
  -1  -1   1  315.37   18.60
  -1  -1   1  351.76   19.40
  -1  -1   1  293.47   21.30
  -1  -1   1  306.97   20.70
  -1  -1   1  298.87   19.20
  -1  -1   1  317.47   22.00
  -1  -1   1  299.17   24.90
  -1  -1   1  263.47   18.80
   0  -1   1  239.28   16.60
  -1   1  -1 1841.32   91.49
  -1   1  -1 1733.13   88.79
  -1   1  -1 1636.14   88.99
  -1   1  -1 1788.12   91.89
  -1   1  -1 1710.73   89.29
  -1   1  -1 1687.93   90.79
  -1   1  -1 1521.05   91.09
   1  -1   1 1729.53   89.79
   1  -1   1 1716.03   91.19
   1  -1   1 1847.42   92.09
   1  -1   1 1714.63   91.39
   1  -1   1 1825.82   89.79
   1  -1   1 1656.53   88.99
  -2   1  -1  117.69   14.10
  -2   1  -1  124.19   15.50
  -2   1  -1  161.88   18.00
  -2   1  -1  172.68   20.40
  -2   1  -1  129.09   15.00
  -2   1  -1  150.68   17.40
  -2   1  -1  201.58   20.90
  -2   1  -1  170.18   20.00
   2  -1   1  142.09   15.20
   2  -1   1  179.28   22.80
   2  -1   1  129.89   13.90
   2  -1   1  145.19   17.60
   2  -1   1  138.99   14.70
   2  -1   1  143.59   19.00
   2  -1   1  164.58   20.70
   2  -1   1  169.98   18.90
  -3   1  -1 1319.77   79.09
  -3   1  -1 1421.86   82.89
  -3   1  -1 1428.46   78.99
  -3   1  -1 1416.36   77.49
  -3   1  -1 1350.76   76.49
  -3   1  -1 1452.55   79.49
  -3   1  -1 1458.85   82.19
  -3   1  -1 1508.15   77.19
  -3   1  -1 1239.08   80.79
   3  -1   1 1484.05   79.09
   3  -1   1 1401.86   77.99
   3  -1   1 1638.44   82.89
   3  -1   1 1336.47   79.39
   3  -1   1 1271.07   81.29
   3  -1   1 1486.15   77.09
   3  -1   1 1599.94   81.19
   3  -1   1 1491.85   83.39
  -4   1  -1  148.59   20.50
  -4   1  -1   90.49   19.80
  -4   1  -1  108.59   16.00
  -4   1  -1  152.28   24.10
  -4   1  -1   85.69   14.10
  -4   1  -1  107.89   17.00
   4  -1   1   93.99   17.50
   4  -1   1   99.19   15.00
   4  -1   1   69.89   14.90
   4  -1   1   93.09   17.70
   4  -1   1   97.69   20.10
   4  -1   1   74.59   18.40
   4  -1   1  144.09   23.20
  -5   1  -1  645.34   45.10
  -5   1  -1  710.73   48.30
  -5   1  -1  790.92   54.59
  -5   1  -1  679.73   44.10
  -5   1  -1  640.24   51.99
  -5   1  -1  693.93   51.49
  -5   1  -1  692.13   48.30
  -5   1  -1  626.64   46.70
  -5   1  -1  683.73   44.60
   5  -1   1  737.03   54.69
   5  -1   1  725.03   49.99
   5  -1   1  619.74   47.20
   5  -1   1  762.62   47.80
   5  -1   1  695.83   58.59
   5  -1   1  660.53   50.89
   5  -1   1  614.14   43.00
   5  -1   1  662.53   44.20
   5  -1   1  676.33   47.20
  -6   1  -1  185.88   33.00
  -6   1  -1  181.38   25.40
  -6   1  -1  234.78   28.70
  -6   1  -1  222.08   34.90
  -6   1  -1  198.28   31.70
  -6   1  -1  163.08   24.00
  -6   1  -1  187.68   24.40
  -6   1  -1  207.78   24.90
  -6   1  -1  194.18   28.40
   6  -1   1  224.48   25.90
   6  -1   1  161.28   29.60
   6  -1   1  208.58   31.50
   6  -1   1  219.38   29.00
   6  -1   1  199.28   26.20
   6  -1   1  212.98   33.00
   6  -1   1  225.08   31.30
   6  -1   1  216.48   27.90
  -7   1  -1  549.65   48.60
  -7   1  -1  591.84   56.39
  -7   1  -1  506.75   53.89
  -7   1  -1  625.34   45.70
  -7   1  -1  565.64   46.10
  -7   1  -1  581.54   52.79
  -7   1  -1  577.34   44.30
  -7   1  -1  610.74   50.69
   7  -1   1  614.34   48.90
   7  -1   1  535.95   56.59
   7  -1   1  575.74   44.10
   7  -1   1  555.04   44.10
   7  -1   1  608.44   57.69
   7  -1   1  636.84   50.19
   7  -1   1  616.54   52.79
   7  -1   1  672.33   53.39
   7  -1   1  653.23   57.89
  -8   1  -1  539.15   50.29
  -8   1  -1  432.46   51.09
  -8   1  -1  472.35   49.00
  -8   1  -1  542.45   56.89
  -8   1  -1  566.34   49.40
  -8   1  -1  447.36   43.60
  -8   1  -1  542.15   57.79
  -8   1  -1  588.24   46.20
  -8   1  -1  464.45   43.80
   8  -1   1  610.64   50.19
   8  -1   1  621.24   65.79
   8  -1   1  504.65   50.39
   8  -1   1  520.65   44.50
   8  -1   1  446.36   53.09
   8  -1   1  550.44   54.39
   8  -1   1  500.75   44.90
   8  -1   1  606.64   51.09
  -9   1  -1  642.54   55.89
  -9   1  -1  622.04   54.09
  -9   1  -1  669.13   68.99
  -9   1  -1  637.54   60.09
  -9   1  -1  548.95   63.19
  -9   1  -1  628.04   54.59
  -9   1  -1  827.72   63.49
   9  -1   1  640.84   53.49
   9  -1   1  824.92   66.59
   9  -1   1  668.53   70.69
   9  -1   1  745.63   70.99
   9  -1   1  763.42   65.39
   9  -1   1  733.93   64.39
   9  -1   1  806.82   62.19
   9  -1   1  631.74   54.19
 -10   1  -1    0.40   21.50
 -10   1  -1  -42.50   17.30
 -10   1  -1   30.00   25.30
  10  -1   1   -0.90   22.30
  10  -1   1    7.00   34.80
  10  -1   1   10.70   19.60
  10  -1   1  -14.10   18.10
  10  -1   1   15.80   28.10
  10  -1   1   72.09   29.80
  10  -1   1   -0.60   31.40
  10  -1   1   15.40   27.20
 -11   1  -1   19.20   22.30
 -11   1  -1   55.39   26.90
 -11   1  -1    0.40   29.50
  11  -1   1   28.00   25.60
  11  -1   1    0.80   23.60
  11  -1   1  -12.30   59.89
  11  -1   1   90.99   35.70
  11  -1   1   25.20   27.70
  11  -1   1   36.90   31.50
  11  -1   1   -0.50   29.00
 -12   1  -1   39.30   30.40
 -12   1  -1   80.39   46.40
 -12   1  -1   89.29   29.30
 -12   1  -1   61.69   40.30
 -12   1  -1   50.69   30.80
  12  -1   1    8.90   36.90
  12  -1   1  143.49   44.50
  12  -1   1   34.60   35.60
  12  -1   1   51.79   37.30
  12  -1   1   26.90   27.00
  12  -1   1   69.89   44.20
 -13   1  -1  184.58   56.69
 -13   1  -1  199.18   59.09
 -13   1  -1  134.79   41.00
 -13   1  -1  194.08   38.30
  13  -1   1  225.38   48.70
  13  -1   1  214.78   58.29
  13  -1   1  196.08   58.99
  13  -1   1  194.58   47.00
 -14   1  -1  142.69   51.69
 -14   1  -1  167.78   60.29
 -14   1  -1   98.49   51.89
 -14   1  -1   98.79   38.90
  14  -1   1   99.69   35.20
  14  -1   1  183.78   56.69
  14  -1   1  104.19   45.10
  14  -1   1   92.89   42.10
  14   0  -1  -21.20   32.20
  14   0  -1   24.60   46.10
  14   0  -1  -39.40   26.20
  14   0  -1  -32.70   34.30
 -14   0   1   10.20   50.19
 -14   0   1   60.59   48.60
 -14   0   1   22.40   35.90
  13   0  -1   23.30   31.70
  13   0  -1   99.99   39.50
  13   0  -1   90.79   51.29
  13   0  -1   47.50   43.50
  13   0  -1   49.99   33.80
 -13   0   1   59.19   37.80
 -13   0   1  171.88   58.49
 -13   0   1   49.99   43.70
 -13   0   1   11.90   32.40
  12   0  -1  142.89   44.50
  12   0  -1  164.38   39.90
  12   0  -1  152.58   45.20
  12   0  -1   41.80   38.40
  12   0  -1   48.20   40.80
 -12   0   1   64.29   39.70
 -12   0   1  205.48   67.59
 -12   0   1  120.79   33.70
 -12   0   1  214.78   75.79
  11   0  -1   34.10   26.90
  11   0  -1   63.19   27.50
  11   0  -1   82.89   35.00
  11   0  -1   40.30   26.70
 -11   0   1   89.89   31.30
 -11   0   1   75.49   37.50
 -11   0   1   85.49   28.40
 -11   0   1   70.39   44.80
  10   0  -1   -8.90   32.70
  10   0  -1  -29.20   17.80
  10   0  -1    5.00   25.70
  10   0  -1  -27.40   20.90
  10   0  -1  -12.60   23.50
  10   0  -1  -36.10   23.30
  10   0  -1  -19.90   20.40
  10   0  -1   -0.90   32.10
 -10   0   1    3.60   29.50
 -10   0   1    4.20   34.10
 -10   0   1   17.30   22.00
 -10   0   1   -8.90   21.00
 -10   0   1  -10.40   21.60
   9   0  -1   14.10   28.30
   9   0  -1   -5.60   23.30
   9   0  -1   21.30   26.70
   9   0  -1   28.40   19.90
   9   0  -1   21.80   16.90
   9   0  -1   49.30   21.90
   9   0  -1   75.59   25.40
   9   0  -1   73.89   28.60
   9   0  -1  -17.30   19.70
  -9   0   1    6.60   20.70
  -9   0   1    7.70   24.50
  -9   0   1   54.39   30.90
  -9   0   1   30.30   22.10
  -9   0   1    9.80   30.60
  -9   0   1   68.79   21.60
   8   0  -1  368.66   47.80
   8   0  -1  303.27   34.80
   8   0  -1  301.57   38.30
   8   0  -1  274.87   40.50
   8   0  -1  325.27   30.70
   8   0  -1  260.47   36.50
   8   0  -1  333.87   37.20
   8   0  -1  213.38   33.50
   8   0  -1  321.27   45.80
   8   0  -1  347.97   41.00
  -8   0   1  355.26   71.99
  -8   0   1  252.37   37.10
  -8   0   1  257.97   43.10
  -8   0   1  234.98   48.40
  -8   0   1  244.28   36.30
  -8   0   1  249.78   37.90
  -8   0   1  272.77   35.00
  -8   0   1  233.98   33.20
   7   0  -1   29.70   16.00
   7   0  -1   54.29   14.70
   7   0  -1   36.50   20.20
   7   0  -1   73.09   26.90
   7   0  -1   64.89   18.80
   7   0  -1   62.39   21.30
   7   0  -1   60.99   42.10
   7   0  -1   81.99   23.70
   7   0  -1  103.29   28.10
  -7   0   1   96.49   23.10
  -7   0   1   51.39   18.50
  -7   0   1   84.59   26.30
  -7   0   1   53.09   17.80
  -7   0   1   83.69   20.20
  -7   0   1   62.59   18.00
  -7   0   1   63.89   23.10
  -7   0   1   71.19   20.70
   6   0  -1  108.29   19.40
   6   0  -1   91.99   24.10
   6   0  -1   72.79   15.50
   6   0  -1   91.09   26.50
   6   0  -1   85.39   17.30
   6   0  -1   87.49   21.30
   6   0  -1  125.89   22.80
   6   0  -1  130.69   23.10
   6   0  -1   95.69   20.60
   6   0  -1  103.79   20.80
  -6   0   1  120.69   23.00
  -6   0   1  108.99   20.90
  -6   0   1   87.29   24.90
  -6   0   1  120.89   21.00
  -6   0   1   90.89   20.00
  -6   0   1  124.29   18.80
  -6   0   1  116.09   17.70
  -6   0   1  105.09   20.00
  -6   0   1   92.39   22.80
   5   0  -1  232.18   24.90
   5   0  -1  227.98   26.10
   5   0  -1  225.58   26.60
   5   0  -1  187.48   28.80
   5   0  -1  165.28   27.10
   5   0  -1  204.48   26.20
   5   0  -1  230.98   28.00
   5   0  -1  296.57   29.20
   5   0  -1  261.37   23.90
  -5   0   1  239.88   22.10
  -5   0   1  254.37   32.90
  -5   0   1  216.88   25.10
  -5   0   1  169.88   26.00
  -5   0   1  158.78   26.20
  -5   0   1  262.67   24.50
  -5   0   1  244.68   27.40
  -5   0   1  233.88   24.20
  -5   0   1  206.88   26.60
   4   0  -1  243.88   25.60
   4   0  -1  201.98   23.40
   4   0  -1  175.48   22.60
   4   0  -1  206.08   23.00
   4   0  -1  200.78   26.20
   4   0  -1  178.98   25.30
  -4   0   1  167.48   24.00
  -4   0   1  210.78   23.50
  -4   0   1  259.77   20.50
  -4   0   1  204.98   24.20
  -4   0   1  162.08   24.90
  -4   0   1  218.38   27.50
  -4   0   1  205.78   21.90
  -4   0   1  227.98   24.20
   3   0  -1    8.80    8.30
   3   0  -1   -1.30    8.90
   3   0  -1   -0.60    6.60
   3   0  -1    6.50    6.60
   3   0  -1    3.40   10.10
   3   0  -1    8.40    8.20
   3   0  -1    2.80    9.40
   3   0  -1    0.70   11.80
   3   0  -1    3.00    8.30
   3   0  -1    9.10    8.70
  -3   0   1    1.00    8.90
  -3   0   1  -11.50    8.00
  -3   0   1    5.00    9.90
  -3   0   1   -4.30   10.60
  -3   0   1    6.80    6.40
  -3   0   1   -0.20    7.90
  -3   0   1   15.40   12.00
  -3   0   1   -0.20    7.40
  -3   0   1    8.10    7.60
   2   0  -1   52.99    9.70
   2   0  -1   75.09   10.70
   2   0  -1   61.69   12.00
   2   0  -1   63.29   10.00
   2   0  -1   57.89   10.50
   2   0  -1   66.19    8.50
   2   0  -1   58.49   11.10
   2   0  -1   59.09   10.20
   2   0  -1   59.39   10.10
   2   0  -1   61.79    8.30
  -2   0   1   72.99   10.50
  -2   0   1   65.19   12.20
  -2   0   1   62.59    9.50
  -2   0   1   71.19   11.90
  -2   0   1   52.09    8.00
  -2   0   1   55.99   10.00
  -2   0   1   55.99    9.60
  -2   0   1   71.39   11.40
   1   0  -1 2485.55  122.49
   1   0  -1 2267.77  122.79
   1   0  -1 2279.97  123.29
   1   0  -1 2475.65  122.19
  -1   0   1 2503.65  122.39
  -1   0   1 2287.27  123.99
  -1   0   1 2316.17  123.49
  -1   0   1 2448.75  122.39
  -1   0   1 2482.75  122.39
  -1   0   1 2448.96  121.29
  -1   0  -1  942.61   53.59
  -2   0  -1  565.04   37.70
  -2   0  -1  662.03   34.40
  -2   0  -1  572.74   33.20
  -2   0  -1  555.24   31.30
  -2   0  -1  545.95   32.90
  -2   0  -1  588.44   32.50
  -2   0  -1  544.95   35.60
   2   0   1  575.04   32.80
   2   0   1  520.75   35.30
   2   0   1  558.04   31.20
   2   0   1  552.84   35.70
   2   0   1  565.04   33.10
   2   0   1  579.54   33.90
   2   0   1  547.65   32.60
  -3   0  -1  257.77   19.60
  -3   0  -1  294.77   22.90
  -3   0  -1  283.37   21.40
  -3   0  -1  250.87   26.00
  -3   0  -1  190.38   22.70
  -3   0  -1  225.98   19.20
  -3   0  -1  229.68   21.30
  -3   0  -1  243.68   25.00
  -3   0  -1  282.07   26.30
   3   0   1  265.97   25.40
   3   0   1  276.67   25.30
   3   0   1  270.07   26.20
   3   0   1  254.57   20.00
   3   0   1  241.28   20.20
   3   0   1  218.18   25.80
   3   0   1  248.98   22.30
   3   0   1  232.48   18.90
   3   0   1  253.27   21.00
   3   0   1  291.27   21.10
  -4   0  -1  172.58   24.10
  -4   0  -1  190.28   20.30
  -4   0  -1  143.89   19.10
  -4   0  -1  167.68   20.90
  -4   0  -1  155.38   24.80
  -4   0  -1  164.68   23.30
  -4   0  -1  173.38   23.00
  -4   0  -1  179.38   20.20
  -4   0  -1  169.38   18.90
   4   0   1  174.18   21.20
   4   0   1  133.99   23.40
   4   0   1  158.98   22.70
   4   0   1  196.98   20.30
   4   0   1  188.98   22.20
   4   0   1  195.08   23.40
   4   0   1  193.58   18.90
   4   0   1  155.78   19.80
   4   0   1  161.88   21.30
   4   0   1  170.18   18.30
  -5   0  -1  187.48   21.50
  -5   0  -1  222.68   25.50
  -5   0  -1  167.88   26.00
  -5   0  -1  207.28   23.40
  -5   0  -1  210.38   25.60
  -5   0  -1  162.98   21.30
  -5   0  -1  224.58   24.60
  -5   0  -1  207.78   27.30
  -5   0  -1  177.48   27.30
   5   0   1  240.98   27.20
   5   0   1  184.28   23.70
   5   0   1  149.09   21.90
   5   0   1  178.48   20.60
   5   0   1  261.67   30.90
   5   0   1  182.88   21.40
   5   0   1  172.48   24.40
   5   0   1  174.18   21.00
   5   0   1  140.79   23.80
   5   0   1  172.08   26.40
  -6   0  -1  380.36   35.80
  -6   0  -1  403.76   36.10
  -6   0  -1  320.97   37.70
  -6   0  -1  363.66   31.90
  -6   0  -1  394.96   32.70
  -6   0  -1  406.96   34.50
  -6   0  -1  382.66   39.60
  -6   0  -1  423.26   36.30
  -6   0  -1  288.97   36.70
   6   0   1  404.26   37.60
   6   0   1  381.56   33.20
   6   0   1  455.35   36.40
   6   0   1  365.46   39.10
   6   0   1  433.46   33.40
   6   0   1  364.66   42.00
   6   0   1  355.26   38.70
   6   0   1  425.76   37.10
   6   0   1  399.86   32.20
   6   0   1  431.46   43.50
  -7   0  -1 1561.64   96.89
  -7   0  -1 1420.86   89.19
  -7   0  -1 1384.86   88.09
  -7   0  -1 1353.96   95.09
  -7   0  -1 1419.46   87.39
  -7   0  -1 1332.97   92.89
  -7   0  -1 1448.46   86.69
  -7   0  -1 1525.25   91.29
   7   0   1 1521.25   91.69
   7   0   1 1534.25   98.29
   7   0   1 1537.75  101.79
   7   0   1 1566.04   93.09
   7   0   1 1449.26   86.19
   7   0   1 1669.53   99.09
   7   0   1 1517.75   92.09
   7   0   1 1519.15   86.59
  -8   0  -1 1226.48   75.19
  -8   0  -1 1149.19   83.69
  -8   0  -1 1136.59   72.69
  -8   0  -1 1014.60   75.19
  -8   0  -1 1232.58   77.79
  -8   0  -1 1030.40   82.49
  -8   0  -1  972.50   79.19
   8   0   1 1094.99   91.59
   8   0   1 1241.78   88.99
   8   0   1 1217.48   73.19
   8   0   1 1109.09   79.59
   8   0   1 1099.79   73.19
   8   0   1 1051.39   78.99
   8   0   1 1237.28   86.39
   8   0   1 1187.58   77.49
   8   0   1 1218.88   79.59
  -9   0  -1   57.09   23.90
  -9   0  -1  102.79   24.60
  -9   0  -1   58.19   44.10
  -9   0  -1  108.39   23.90
  -9   0  -1  137.79   28.20
  -9   0  -1   63.49   31.40
   9   0   1   77.29   24.50
   9   0   1   74.39   31.40
   9   0   1   89.79   22.00
   9   0   1   51.09   25.30
   9   0   1   76.29   23.70
   9   0   1  119.39   32.70
   9   0   1   90.59   24.30
   9   0   1  104.19   28.00
 -10   0  -1   47.50   25.60
 -10   0  -1   55.19   38.30
 -10   0  -1   73.79   25.90
 -10   0  -1   36.00   31.90
 -10   0  -1   20.20   31.60
 -10   0  -1   63.39   26.20
  10   0   1   97.99   55.79
  10   0   1   66.29   35.10
  10   0   1   18.20   24.90
  10   0   1   64.39   22.50
  10   0   1   63.89   26.80
  10   0   1   42.70   26.40
  10   0   1   24.40   21.60
  10   0   1   81.19   30.20
 -11   0  -1   55.69   35.80
 -11   0  -1   17.20   40.60
 -11   0  -1   23.80   28.30
 -11   0  -1   -6.90   20.90
 -11   0  -1  -12.70   25.10
  11   0   1  142.99   41.10
  11   0   1   67.59   25.80
  11   0   1   25.70   29.20
  11   0   1   44.60   30.40
  11   0   1   40.40   26.40
  11   0   1   14.50   32.90
  11   0   1    9.40   24.80
 -12   0  -1  189.08   45.40
 -12   0  -1   51.99   32.20
 -12   0  -1  115.29   49.20
 -12   0  -1   89.69   41.70
  12   0   1   53.79   34.90
  12   0   1  194.88   46.30
  12   0   1  174.38   49.00
  12   0   1   87.59   33.80
  12   0   1   62.59   33.50
  12   0   1   28.40   27.60
  12   0   1   87.29   45.50
 -13   0  -1  136.79   40.60
 -13   0  -1  144.89   52.19
 -13   0  -1  212.08   38.90
 -13   0  -1  182.18   66.79
  13   0   1  272.97   48.30
  13   0   1  102.59   44.70
  13   0   1  159.48   49.30
  13   0   1  180.28   51.49
  13   0   1  104.99   48.70
  13   0   1  128.09   46.40
 -14   0  -1  114.39   38.70
 -14   0  -1  185.88   50.39
 -14   0  -1  173.08   62.09
  14   0   1   63.59   39.60
  14   0   1   72.89   39.30
  14   0   1  108.99   46.40
  14   0   1  122.79   48.10
 -15   0  -1   -0.40   64.99
  14  -1  -1  -46.80   45.00
  14  -1  -1  -20.10   32.20
  14  -1  -1   38.90   35.30
  14  -1  -1   32.60   37.00
 -14   1   1  123.29   50.49
 -14   1   1    7.40   38.70
 -14   1   1   -6.50   40.70
 -14   1   1   24.20   51.39
  13  -1  -1  109.79   50.99
  13  -1  -1  102.39   37.80
  13  -1  -1  179.88   43.70
  13  -1  -1   93.19   36.60
  13  -1  -1  138.59   51.19
 -13   1   1  117.59   39.90
 -13   1   1  150.48   67.89
 -13   1   1  230.28   79.19
 -13   1   1  204.68   60.59
  12  -1  -1  131.49   49.20
  12  -1  -1  215.78   66.99
  12  -1  -1  105.49   66.89
  12  -1  -1  138.39   43.10
 -12   1   1  256.57   43.20
 -12   1   1  229.08   65.39
 -12   1   1  201.28   42.00
 -12   1   1  232.08   50.49
  11  -1  -1  -17.80   22.70
  11  -1  -1   17.20   32.80
  11  -1  -1   25.80   24.70
  11  -1  -1   28.50   23.10
 -11   1   1  -19.50   51.59
 -11   1   1   50.99   41.60
 -11   1   1   34.90   25.00
 -11   1   1  -50.89   32.40
  10  -1  -1   28.70   35.30
  10  -1  -1   46.50   29.30
  10  -1  -1    3.20   24.60
  10  -1  -1   -9.20   18.80
  10  -1  -1   -8.00   32.50
  10  -1  -1  -42.80   19.70
  10  -1  -1   12.90   26.30
  10  -1  -1   10.90   22.40
 -10   1   1   -1.30   30.80
 -10   1   1  -11.00   25.40
 -10   1   1   15.20   25.20
   9  -1  -1  -23.10   19.40
   9  -1  -1  180.68   60.39
   9  -1  -1    0.70   21.60
   9  -1  -1   60.89   32.80
   9  -1  -1    2.30   19.20
   9  -1  -1   15.40   21.00
   9  -1  -1   38.90   23.80
   9  -1  -1   -2.10   16.00
  -9   1   1   29.90   22.30
  -9   1   1   85.99   31.20
  -9   1   1   31.80   19.00
  -9   1   1   65.29   23.70
  -9   1   1   35.90   22.60
  -9   1   1   10.30   25.00
   8  -1  -1   66.59   23.30
   8  -1  -1   57.49   26.20
   8  -1  -1   63.99   24.10
   8  -1  -1   67.89   22.20
   8  -1  -1   50.49   23.80
   8  -1  -1   76.29   21.90
   8  -1  -1   36.50   27.40
   8  -1  -1   33.80   17.80
   8  -1  -1   22.30   22.50
  -8   1   1   45.00   24.10
  -8   1   1   89.59   21.10
  -8   1   1    8.80   19.20
  -8   1   1   80.19   22.00
  -8   1   1   79.29   22.90
  -8   1   1   87.59   31.10
  -8   1   1   48.60   26.00
  -8   1   1   19.80   19.20
   7  -1  -1  243.18   28.40
   7  -1  -1  190.98   30.80
   7  -1  -1  230.38   37.40
   7  -1  -1  228.08   39.40
   7  -1  -1  259.47   32.20
   7  -1  -1  159.38   39.90
   7  -1  -1  195.18   32.60
   7  -1  -1  270.87   36.00
   7  -1  -1  279.07   34.90
  -7   1   1  271.37   36.00
  -7   1   1  227.08   30.80
  -7   1   1  242.48   32.80
  -7   1   1  292.97   32.30
  -7   1   1  244.68   27.60
  -7   1   1  241.08   37.60
  -7   1   1  281.07   39.80
  -7   1   1  223.18   29.50
  -7   1   1  184.38   33.70
   6  -1  -1   27.30   16.00
   6  -1  -1   49.80   16.50
   6  -1  -1   31.70   21.10
   6  -1  -1   33.70   17.00
   6  -1  -1   35.90   15.00
   6  -1  -1    5.50   15.10
   6  -1  -1   27.60   22.30
   6  -1  -1   29.40   13.50
  -6   1   1   54.69   16.60
  -6   1   1   28.90   18.00
  -6   1   1    1.40   13.50
  -6   1   1   43.00   13.50
  -6   1   1   -3.70   16.80
  -6   1   1    8.40   14.90
  -6   1   1    7.70   20.00
  -6   1   1    7.20   14.40
  -6   1   1   13.50   13.90
   5  -1  -1  891.71   58.39
   5  -1  -1  932.31   64.09
   5  -1  -1  880.91   56.79
   5  -1  -1  858.41   53.39
   5  -1  -1  891.91   59.39
   5  -1  -1  863.81   59.39
   5  -1  -1  863.51   58.49
   5  -1  -1  870.51   57.79
   5  -1  -1  878.31   63.79
  -5   1   1  922.11   63.19
  -5   1   1 1029.00   59.69
  -5   1   1  783.92   55.19
  -5   1   1  953.40   59.49
  -5   1   1  900.41   63.19
  -5   1   1  842.22   56.89
  -5   1   1  922.61   60.49
  -5   1   1  929.71   52.49
  -5   1   1  851.51   56.99
   4  -1  -1 2028.10  108.89
   4  -1  -1 2046.40  107.99
   4  -1  -1 1835.22  111.19
   4  -1  -1 2084.59  109.59
   4  -1  -1 1990.20  102.89
   4  -1  -1 1951.60  108.99
   4  -1  -1 1834.32  107.69
   4  -1  -1 1941.71  104.39
   4  -1  -1 2106.79  118.19
   4  -1  -1 1958.70  108.69
  -4   1   1 2010.20  112.69
  -4   1   1 1783.22  110.59
  -4   1   1 1912.51  107.99
  -4   1   1 2072.69  107.69
  -4   1   1 2052.69  109.39
  -4   1   1 2032.60  110.19
  -4   1   1 1887.61  108.19
   3  -1  -1  188.58   15.80
   3  -1  -1  162.78   22.10
   3  -1  -1  173.78   20.70
   3  -1  -1  158.78   19.00
   3  -1  -1  177.68   22.10
   3  -1  -1  165.38   18.90
   3  -1  -1  209.88   25.60
   3  -1  -1  169.28   20.80
   3  -1  -1  167.58   18.80
  -3   1   1  174.38   19.60
  -3   1   1  153.08   14.50
  -3   1   1  151.78   18.40
  -3   1   1  171.68   20.00
  -3   1   1  175.98   20.50
  -3   1   1  177.48   22.50
  -3   1   1  165.58   13.90
  -3   1   1  182.48   20.80
  -3   1   1  177.68   21.30
  -3   1   1  180.78   24.20
   2  -1  -1  214.98   23.20
   2  -1  -1  236.68   20.00
   2  -1  -1  239.18   16.60
   2  -1  -1  229.98   20.30
   2  -1  -1  278.67   22.30
   2  -1  -1  267.97   24.50
   2  -1  -1  229.28   20.00
   2  -1  -1  279.57   21.10
   2  -1  -1  233.88   19.50
  -2   1   1  246.48   16.10
  -2   1   1  246.18   20.20
  -2   1   1  279.67   21.40
  -2   1   1  283.87   19.90
  -2   1   1  240.28   21.40
  -2   1   1  251.47   20.50
  -2   1   1  267.07   21.80
  -2   1   1  258.37   15.00
  -2   1   1  261.17   24.10
  -2   1   1  248.08   23.80
   1  -1  -1 1260.37   64.69
   1  -1  -1 1173.48   65.69
   1  -1  -1 1231.08   64.29
   1  -1  -1 1174.78   62.39
   1  -1  -1 1300.77   64.69
   1  -1  -1 1285.97   64.89
   1  -1  -1 1150.68   65.39
  -1   1   1 1299.27   64.99
  -1   1   1 1326.67   64.99
  -1   1   1 1190.68   62.39
  -1   1   1 1254.27   65.99
  -1   1   1 1104.29   65.29
  -1   1   1 1220.38   65.59
  -1   1   1 1218.38   64.99
  -1   1   1 1267.77   64.29
  -1   1   1 1270.27   64.79
  -1  -1  -1  529.35   30.70
  -1  -1  -1  617.74   33.10
  -1  -1  -1  528.85   30.00
  -1  -1  -1  670.23   35.70
   1   1   1  551.04   30.70
   1   1   1  542.45   30.20
   1   1   1  541.95   30.10
   1   1   1  630.44   31.60
   1   1   1  607.74   31.40
   1   1   1  673.83   33.30
  -2  -1  -1  299.17   19.30
  -2  -1  -1  368.46   25.30
  -2  -1  -1  281.17   21.50
  -2  -1  -1  387.56   26.20
  -2  -1  -1  374.16   21.50
  -2  -1  -1  282.77   21.80
   2   1   1  342.57   20.80
   2   1   1  275.17   21.20
   2   1   1  306.47   20.10
   2   1   1  280.57   21.20
   2   1   1  269.57   19.00
   2   1   1  305.17   20.10
   2   1   1  301.17   21.60
  -3  -1  -1   42.90   10.00
  -3  -1  -1   35.20   10.00
  -3  -1  -1   38.00   10.60
  -3  -1  -1   22.50   12.60
  -3  -1  -1   42.80    8.70
  -3  -1  -1   15.50   10.40
  -3  -1  -1   25.40   10.90
  -3  -1  -1   31.30    9.20
  -3  -1  -1   34.60   12.00
   3   1   1   33.70    8.50
   3   1   1   35.20   12.00
   3   1   1   28.60    9.50
   3   1   1   31.40    8.70
   3   1   1   33.80   10.80
   3   1   1   32.20    8.70
   3   1   1   39.60    9.50
   3   1   1   30.70    8.70
   3   1   1   35.80   11.10
   3   1   1   34.00   11.70
  -4  -1  -1  583.04   42.10
  -4  -1  -1  750.22   44.90
  -4  -1  -1  708.43   45.60
  -4  -1  -1  670.93   49.50
  -4  -1  -1  701.13   42.50
  -4  -1  -1  598.44   45.10
  -4  -1  -1  719.53   43.20
  -4  -1  -1  730.23   42.90
  -4  -1  -1  757.22   50.99
   4   1   1  647.84   43.10
   4   1   1  713.63   42.70
   4   1   1  657.43   43.40
   4   1   1  726.83   42.30
   4   1   1  660.03   42.20
   4   1   1  630.44   42.70
   4   1   1  729.93   44.90
   4   1   1  757.62   45.60
   4   1   1  638.04   45.70
   4   1   1  654.83   46.20
  -5  -1  -1  462.55   39.10
  -5  -1  -1  430.56   38.60
  -5  -1  -1  441.76   36.30
  -5  -1  -1  437.46   33.30
  -5  -1  -1  469.75   34.70
  -5  -1  -1  409.86   38.40
  -5  -1  -1  553.74   45.30
  -5  -1  -1  369.76   34.00
   5   1   1  364.46   37.80
   5   1   1  469.95   37.30
   5   1   1  499.95   38.70
   5   1   1  528.05   37.10
   5   1   1  459.65   34.20
   5   1   1  467.65   33.10
   5   1   1  492.75   34.20
   5   1   1  471.45   36.20
   5   1   1  452.15   39.90
   5   1   1  494.45   35.50
  -6  -1  -1 2547.95  134.39
  -6  -1  -1 2125.59  120.39
  -6  -1  -1 2129.39  121.29
  -6  -1  -1 2211.38  126.69
  -6  -1  -1 2356.66  125.59
  -6  -1  -1 2119.69  122.59
  -6  -1  -1 2004.00  121.49
  -6  -1  -1 2279.27  121.29
  -6  -1  -1 2062.99  126.09
   6   1   1 2098.29  120.69
   6   1   1 2238.58  122.89
   6   1   1 2343.87  121.39
   6   1   1 2133.79  133.99
   6   1   1 2200.28  122.09
   6   1   1 2210.98  123.19
   6   1   1 2156.98  120.79
   6   1   1 2337.27  125.59
   6   1   1 2089.29  126.79
   6   1   1 2213.78  123.49
  -7  -1  -1  522.85   51.59
  -7  -1  -1  520.35   45.60
  -7  -1  -1  613.34   52.19
  -7  -1  -1  673.63   61.59
  -7  -1  -1  557.54   46.10
  -7  -1  -1  491.85   48.20
  -7  -1  -1  659.53   46.50
  -7  -1  -1  564.64   43.40
  -7  -1  -1  574.04   45.30
   7   1   1  496.35   62.19
   7   1   1  583.14   44.70
   7   1   1  586.44   46.40
   7   1   1  524.35   52.39
   7   1   1  629.14   53.79
   7   1   1  586.94   46.70
   7   1   1  621.14   49.00
   7   1   1  583.14   43.90
   7   1   1  497.35   45.10
   7   1   1  622.94   44.00
  -8  -1  -1  410.66   47.80
  -8  -1  -1  418.66   39.80
  -8  -1  -1  229.88   55.89
  -8  -1  -1  378.16   39.80
  -8  -1  -1  302.77   39.10
  -8  -1  -1  362.56   39.30
  -8  -1  -1  296.57   40.80
  -8  -1  -1  249.97   40.20
   8   1   1  425.76   40.70
   8   1   1  279.37   44.20
   8   1   1  436.26   38.00
   8   1   1  388.76   43.00
   8   1   1  412.96   43.40
   8   1   1  276.37   47.80
   8   1   1  302.67   39.70
   8   1   1  387.76   38.90
   8   1   1  359.06   37.40
  -9  -1  -1   81.99   26.40
  -9  -1  -1   74.59   31.20
  -9  -1  -1  118.69   26.10
  -9  -1  -1   56.09   21.90
  -9  -1  -1  151.98   39.50
  -9  -1  -1   50.79   23.80
  -9  -1  -1   52.39   23.40
  -9  -1  -1   81.89   30.70
   9   1   1   87.79   23.70
   9   1   1   96.99   25.80
   9   1   1   83.99   24.50
   9   1   1   65.19   26.20
   9   1   1  103.59   33.10
   9   1   1   71.29   29.30
   9   1   1   53.89   23.20
   9   1   1  111.19   29.60
   9   1   1   59.99   27.80
   9   1   1   78.69   26.40
 -10  -1  -1  353.16   54.79
 -10  -1  -1  334.27   44.30
 -10  -1  -1  460.25   50.09
 -10  -1  -1  451.05   59.69
 -10  -1  -1  435.26   64.19
 -10  -1  -1  613.74   61.69
  10   1   1  464.75   49.70
  10   1   1  373.86   53.79
  10   1   1  455.65   54.49
  10   1   1  416.66   45.70
  10   1   1  583.54   52.09
  10   1   1  521.35   64.79
  10   1   1  488.05   61.69
  10   1   1  444.06   54.29
 -11  -1  -1   -5.70   24.30
 -11  -1  -1   -7.90   26.00
 -11  -1  -1   45.70   25.50
 -11  -1  -1  -14.90   36.40
  11   1   1   28.80   26.80
  11   1   1   35.60   25.30
  11   1   1    2.50   26.10
  11   1   1  107.29   62.39
  11   1   1   56.39   32.70
  11   1   1   36.50   31.30
  11   1   1  -49.80   32.60
  11   1   1   54.89   31.50
 -12  -1  -1  226.28   41.70
 -12  -1  -1  159.58   48.60
 -12  -1  -1  253.97   56.19
  12   1   1  251.67   50.09
  12   1   1  171.38   36.50
  12   1   1  259.17   51.19
  12   1   1  311.97   53.69
  12   1   1  297.47   44.50
  12   1   1  289.57   49.99
  12   1   1  231.08   44.60
 -13  -1  -1  268.07   61.19
 -13  -1  -1  225.08   41.00
 -13  -1  -1  293.87   59.19
 -13  -1  -1  225.08   47.00
  13   1   1  332.67   61.39
  13   1   1  196.18   51.99
  13   1   1  215.48   48.00
  13   1   1  273.47   48.60
  13   1   1  158.88   48.50
 -14  -1  -1   49.20   57.39
 -14  -1  -1   39.90   35.80
 -14  -1  -1   70.29   40.70
 -14  -1  -1    5.60   45.80
  14   1   1   47.20   48.60
  14   1   1   72.09   39.80
  14   1   1   54.49   35.60
  14   1   1   13.70   34.30
 -15  -1  -1  163.68   66.39
  14  -2  -1  152.98   45.90
  14  -2  -1  102.49   37.70
  14  -2  -1   81.39   53.79
  14  -2  -1  127.99   67.19
 -14   2   1  132.79   49.20
 -14   2   1  101.79   59.69
 -14   2   1   61.49   53.89
  13  -2  -1   18.90   31.40
  13  -2  -1   48.50   34.10
  13  -2  -1   35.90   30.20
  13  -2  -1   -9.80   43.00
 -13   2   1  -26.80   32.80
 -13   2   1   -5.60   45.30
 -13   2   1   -1.60   48.30
 -13   2   1    1.70   30.60
  12  -2  -1  -17.50   39.60
  12  -2  -1  -18.00   22.00
  12  -2  -1  -33.90   36.20
  12  -2  -1  -30.00   26.20
  12  -2  -1   11.60   36.00
 -12   2   1  -24.00   39.40
 -12   2   1  -17.00   55.69
 -12   2   1  -25.90   25.90
  11  -2  -1   74.59   27.40
  11  -2  -1   36.40   30.20
  11  -2  -1   57.69   48.80
  11  -2  -1    4.70   34.70
  11  -2  -1   67.29   32.40
 -11   2   1   62.79   27.60
 -11   2   1   53.09   32.50
 -11   2   1   67.79   39.60
  10  -2  -1   91.99   35.20
  10  -2  -1  107.29   33.80
  10  -2  -1  216.88   39.00
  10  -2  -1  159.68   43.30
  10  -2  -1  163.78   31.60
  10  -2  -1  145.59   30.60
  10  -2  -1  200.88   41.50
 -10   2   1  145.39   38.30
   9  -2  -1   97.39   37.90
   9  -2  -1  136.09   34.50
   9  -2  -1  260.87   64.99
   9  -2  -1  197.28   31.20
   9  -2  -1  122.19   35.20
   9  -2  -1  146.09   41.70
   9  -2  -1  104.19   33.20
  -9   2   1  135.99   42.50
  -9   2   1  145.29   29.40
  -9   2   1  119.49   29.10
  -9   2   1  119.49   32.40
  -9   2   1  156.78   26.90
  -9   2   1  138.69   30.40
   8  -2  -1   20.40   17.90
   8  -2  -1    7.00   22.60
   8  -2  -1   11.60   20.30
   8  -2  -1   25.20   27.20
   8  -2  -1    5.70   17.20
   8  -2  -1   33.30   17.10
   8  -2  -1   22.90   20.30
   8  -2  -1    0.50   23.70
   8  -2  -1    2.40   26.40
  -8   2   1    5.90   21.90
  -8   2   1    5.00   15.90
  -8   2   1  -20.70   19.60
  -8   2   1   18.30   18.50
  -8   2   1   18.30   20.10
  -8   2   1  -16.20   26.60
  -8   2   1    5.70   20.70
  -8   2   1  -11.50   17.40
   7  -2  -1  211.48   30.80
   7  -2  -1  303.07   43.70
   7  -2  -1  184.08   31.60
   7  -2  -1  249.48   33.00
   7  -2  -1  236.28   33.60
   7  -2  -1  251.77   28.30
   7  -2  -1  273.47   33.20
   7  -2  -1  331.37   44.90
   7  -2  -1  194.08   33.30
  -7   2   1  212.28   26.40
  -7   2   1  269.57   32.70
  -7   2   1  194.38   31.20
  -7   2   1  240.48   35.10
  -7   2   1  247.38   31.80
  -7   2   1  218.08   33.80
  -7   2   1  215.48   30.70
  -7   2   1  284.07   41.00
   6  -2  -1   58.49   18.40
   6  -2  -1   49.99   19.90
   6  -2  -1    4.80   19.20
   6  -2  -1   67.79   18.70
   6  -2  -1   88.59   16.10
   6  -2  -1   70.59   24.80
   6  -2  -1   30.90   16.50
   6  -2  -1   52.09   23.60
   6  -2  -1   44.30   20.60
  -6   2   1   55.79   21.40
  -6   2   1   29.00   20.80
  -6   2   1   65.79   19.60
  -6   2   1   36.10   23.00
  -6   2   1   35.00   16.10
  -6   2   1   56.59   17.60
  -6   2   1   53.19   18.30
  -6   2   1   53.59   12.80
  -6   2   1   57.89   20.40
   5  -2  -1  542.05   48.10
   5  -2  -1  431.36   32.70
   5  -2  -1  462.15   38.50
   5  -2  -1  492.85   41.60
   5  -2  -1  465.95   40.80
   5  -2  -1  500.45   39.50
   5  -2  -1  402.06   47.60
   5  -2  -1  425.46   38.20
   5  -2  -1  464.55   45.60
  -5   2   1  480.85   38.80
  -5   2   1  522.05   40.70
  -5   2   1  552.04   43.90
  -5   2   1  449.66   39.20
  -5   2   1  482.45   45.60
  -5   2   1  402.56   30.50
  -5   2   1  492.75   36.10
  -5   2   1  435.96   39.50
  -5   2   1  511.75   46.50
   4  -2  -1  368.36   37.80
   4  -2  -1  290.17   34.60
   4  -2  -1  303.37   27.90
   4  -2  -1  287.17   22.50
   4  -2  -1  320.17   31.50
   4  -2  -1  264.67   27.80
   4  -2  -1  283.27   29.90
   4  -2  -1  258.67   30.00
  -4   2   1  283.37   28.60
  -4   2   1  295.97   35.60
  -4   2   1  281.47   20.90
  -4   2   1  350.06   35.60
  -4   2   1  293.37   27.80
  -4   2   1  276.87   30.90
  -4   2   1  329.77   29.90
  -4   2   1  333.27   27.40
  -4   2   1  216.38   27.60
   3  -2  -1  114.49   16.10
   3  -2  -1  138.59   19.60
   3  -2  -1  139.29   17.90
   3  -2  -1  117.09   17.30
   3  -2  -1  131.19   22.30
   3  -2  -1  143.09   22.00
   3  -2  -1  114.09   17.90
   3  -2  -1  113.89   17.50
   3  -2  -1  115.99   12.70
  -3   2   1  103.99   19.70
  -3   2   1  132.69   17.70
  -3   2   1  121.89   18.50
  -3   2   1  109.89   17.50
  -3   2   1  142.79   17.00
  -3   2   1  151.38   22.90
  -3   2   1  122.39   17.00
  -3   2   1  123.29   19.00
   2  -2  -1  434.26   25.70
   2  -2  -1  494.55   30.30
   2  -2  -1  483.25   32.00
   2  -2  -1  463.15   34.50
   2  -2  -1  462.65   32.40
   2  -2  -1  448.96   30.50
   2  -2  -1  485.95   31.90
   2  -2  -1  456.45   33.90
   2  -2  -1  412.36   31.30
  -2   2   1  446.96   34.80
  -2   2   1  440.86   32.80
  -2   2   1  462.55   31.70
  -2   2   1  442.86   34.70
  -2   2   1  431.66   28.90
  -2   2   1  492.55   32.10
  -2   2   1  415.96   30.40
  -2   2   1  475.75   32.40
   1  -2  -1   20.00    8.30
   1  -2  -1   21.60    6.70
   1  -2  -1   16.70    8.00
   1  -2  -1   18.70    6.60
   1  -2  -1   10.70    8.60
   1  -2  -1   10.30    6.80
   1  -2  -1   11.10    7.30
  -1   2   1    5.40    9.00
  -1   2   1   15.40    8.80
  -1   2   1    3.30    5.50
  -1   2   1   19.10    7.60
  -1   2   1   26.90    7.30
  -1   2   1   13.30    7.70
  -1   2   1    8.70    8.80
  -1   2   1   14.50    7.50
   0  -2  -1   23.50    7.00
   0   2   1   27.10    7.20
   0   2   1   20.00    6.40
  -1  -2  -1    4.50    2.80
  -1  -2  -1   -4.40    6.90
  -1  -2  -1    2.40    2.90
  -1  -2  -1    4.60    4.00
  -1  -2  -1    1.40    4.20
   1   2   1  -10.30    8.60
   1   2   1    0.50    3.70
   1   2   1    0.80    6.10
   1   2   1   10.40    4.50
   1   2   1    5.40    3.10
   1   2   1    2.50    7.50
   1   2   1    3.70    2.80
   1   2   1    1.00    4.40
  -2  -2  -1  590.44   37.80
  -2  -2  -1  738.33   48.50
  -2  -2  -1  734.63   40.10
  -2  -2  -1  707.23   39.70
  -2  -2  -1  742.53   43.60
  -2  -2  -1  701.03   41.00
  -2  -2  -1  719.23   38.10
   2   2   1  627.64   38.30
   2   2   1  698.23   40.20
   2   2   1  754.82   42.70
   2   2   1  725.13   40.60
   2   2   1  727.63   47.60
   2   2   1  674.43   39.80
   2   2   1  739.53   43.20
  -3  -2  -1  772.92   47.00
  -3  -2  -1  794.02   43.70
  -3  -2  -1  645.34   41.30
  -3  -2  -1  744.63   47.50
  -3  -2  -1  799.42   42.10
  -3  -2  -1  670.53   44.00
  -3  -2  -1  710.13   42.60
  -3  -2  -1  748.83   51.29
   3   2   1  701.73   42.60
   3   2   1  666.03   44.40
   3   2   1  809.32   42.70
   3   2   1  733.73   44.70
   3   2   1  808.92   48.90
   3   2   1  655.43   41.80
   3   2   1  679.83   44.40
   3   2   1  766.32   43.50
   3   2   1  760.32   46.30
   3   2   1  762.92   43.60
  -4  -2  -1  289.27   27.60
  -4  -2  -1  276.77   27.20
  -4  -2  -1  294.17   26.20
  -4  -2  -1  281.27   27.60
  -4  -2  -1  278.37   22.70
  -4  -2  -1  300.87   23.60
  -4  -2  -1  274.47   28.20
  -4  -2  -1  289.27   23.70
  -4  -2  -1  332.17   33.50
   4   2   1  260.27   26.50
   4   2   1  266.17   23.80
   4   2   1  246.38   26.40
   4   2   1  265.07   25.10
   4   2   1  273.37   23.30
   4   2   1  280.07   27.30
   4   2   1  293.67   25.60
   4   2   1  297.77   24.80
   4   2   1  306.47   25.30
  -5  -2  -1  359.36   29.80
  -5  -2  -1  444.96   41.00
  -5  -2  -1  399.26   35.80
  -5  -2  -1  359.26   29.10
  -5  -2  -1  340.97   29.80
  -5  -2  -1  398.46   33.30
  -5  -2  -1  309.17   32.80
  -5  -2  -1  320.17   33.50
  -5  -2  -1  407.36   33.40
  -5  -2  -1  346.17   29.60
   5   2   1  387.86   32.80
   5   2   1  341.87   34.20
   5   2   1  349.57   32.20
   5   2   1  370.66   33.30
   5   2   1  434.56   37.00
   5   2   1  336.77   30.70
   5   2   1  350.06   29.40
   5   2   1  372.96   30.50
   5   2   1  336.97   30.70
   5   2   1  355.56   30.80
  -6  -2  -1 1794.12  100.69
  -6  -2  -1 1773.42   99.89
  -6  -2  -1 1851.31  109.19
  -6  -2  -1 1613.24  101.39
  -6  -2  -1 1777.92  103.29
  -6  -2  -1 1689.73   96.49
  -6  -2  -1 1673.33  100.79
  -6  -2  -1 1739.63   97.19
   6   2   1 1751.22  100.19
   6   2   1 1674.73   98.99
   6   2   1 1795.42   98.29
   6   2   1 1630.54  102.59
   6   2   1 1694.33   97.99
   6   2   1 1720.83   99.19
   6   2   1 1675.43   98.69
   6   2   1 1592.84  102.39
   6   2   1 1739.83   97.89
  -7  -2  -1   15.90   17.00
  -7  -2  -1   39.20   21.10
  -7  -2  -1    8.90   18.30
  -7  -2  -1   21.40   14.80
  -7  -2  -1   13.20   18.30
  -7  -2  -1   38.30   17.00
  -7  -2  -1    8.90   22.40
  -7  -2  -1    3.50   17.30
  -7  -2  -1   37.20   14.80
   7   2   1   27.00   16.10
   7   2   1   23.20   15.10
   7   2   1  -12.00   14.10
   7   2   1   -9.80   15.90
   7   2   1    4.20   18.60
   7   2   1   21.00   15.70
   7   2   1   13.50   20.60
   7   2   1   37.70   18.20
   7   2   1   -4.00   15.30
   7   2   1  -12.40   14.00
  -8  -2  -1   76.29   26.00
  -8  -2  -1   84.89   21.20
  -8  -2  -1   95.89   22.40
  -8  -2  -1  101.59   24.60
  -8  -2  -1   75.89   27.60
  -8  -2  -1  130.49   29.40
  -8  -2  -1   71.79   25.10
  -8  -2  -1  110.69   24.40
  -8  -2  -1  102.69   34.20
   8   2   1   95.59   27.00
   8   2   1  130.79   27.20
   8   2   1   93.09   25.30
   8   2   1   82.79   22.70
   8   2   1   46.50   27.70
   8   2   1  110.89   21.60
   8   2   1   98.39   33.80
   8   2   1   81.89   22.80
   8   2   1   92.79   28.30
   8   2   1   98.99   25.40
  -9  -2  -1    9.90   23.30
  -9  -2  -1   29.10   30.10
  -9  -2  -1    7.30   18.70
  -9  -2  -1   34.40   26.00
  -9  -2  -1  -28.70   22.70
  -9  -2  -1   20.90   20.20
  -9  -2  -1   55.09   22.40
   9   2   1   -8.40   26.40
   9   2   1   28.40   21.10
   9   2   1    0.40   24.10
   9   2   1   58.89   24.20
   9   2   1  -16.90   20.10
   9   2   1   38.20   19.70
   9   2   1   48.00   22.30
   9   2   1   -1.30   18.30
   9   2   1   24.90   22.10
   9   2   1    3.50   17.40
 -10  -2  -1   18.60   25.20
 -10  -2  -1   56.49   36.70
 -10  -2  -1   46.80   23.20
  10   2   1   57.29   25.20
  10   2   1   51.89   22.20
  10   2   1   -1.70   19.50
  10   2   1   47.10   25.50
  10   2   1   36.10   24.30
  10   2   1   -2.30   22.40
  10   2   1    0.70   23.70
  10   2   1   47.10   33.30
  10   2   1   55.59   31.60
 -11  -2  -1  299.67   49.00
 -11  -2  -1  410.96   50.79
 -11  -2  -1  352.76   61.89
 -11  -2  -1  413.96   57.59
 -11  -2  -1  463.15   52.09
 -11  -2  -1  503.55   69.19
  11   2   1  376.76   62.99
  11   2   1  511.25   53.99
  11   2   1  426.86   50.49
  11   2   1  493.35   62.29
  11   2   1  429.26   56.39
 -12  -2  -1  317.47   47.80
 -12  -2  -1  324.37   58.29
 -12  -2  -1  283.17   50.29
 -12  -2  -1  287.37   60.49
  12   2   1  186.38   38.90
  12   2   1  130.89   57.19
  12   2   1  265.67   45.90
  12   2   1  290.27   49.40
  12   2   1  379.66   60.29
  12   2   1  194.68   45.70
  12   2   1  318.77   47.10
  12   2   1  278.67   53.89
 -13  -2  -1   55.49   50.99
 -13  -2  -1    8.60   39.40
 -13  -2  -1   72.89   33.20
 -13  -2  -1    9.30   33.20
  13   2   1   76.89   42.00
  13   2   1    4.00   39.00
  13   2   1    6.60   35.70
  13   2   1   20.70   36.00
  13   2   1    3.90   30.00
 -14  -2  -1   46.20   37.30
 -14  -2  -1  100.59   46.80
 -14  -2  -1    8.90   32.60
  14   2   1   34.70   33.70
  14   2   1   49.30   48.00
  14   2   1   -1.70   37.30
  14   2   1   56.19   32.70
  14  -3  -1   74.89   42.10
  14  -3  -1  129.69   43.30
  14  -3  -1   33.70   80.09
 -14   3   1   57.19   38.30
 -14   3   1   52.59   51.79
 -14   3   1   28.90   54.29
 -14   3   1   91.99   44.80
  13  -3  -1   36.80   33.50
  13  -3  -1  -30.70   43.90
  13  -3  -1   22.00   35.30
  13  -3  -1    5.30   26.10
 -13   3   1    1.40   30.90
 -13   3   1   50.09   46.00
  12  -3  -1   61.09   34.00
  12  -3  -1   -9.60   43.80
  12  -3  -1   70.39   35.00
  12  -3  -1   34.50   26.80
 -12   3   1  -16.20   32.70
 -12   3   1   57.99   31.00
  11  -3  -1   40.90   52.89
  11  -3  -1  178.68   43.00
  11  -3  -1  154.98   32.80
  11  -3  -1  115.49   38.30
  11  -3  -1  136.39   41.20
  11  -3  -1  124.79   37.40
 -11   3   1  195.58   35.80
 -11   3   1  186.48   60.39
 -11   3   1  136.09   45.60
  10  -3  -1  -13.40   21.40
  10  -3  -1   36.10   32.40
  10  -3  -1   24.40   32.90
  10  -3  -1   45.90   30.30
  10  -3  -1   12.30   26.60
  10  -3  -1   -4.40   35.40
  10  -3  -1    1.20   20.00
 -10   3   1   20.80   22.50
 -10   3   1   10.20   25.20
 -10   3   1   -0.70   33.40
 -10   3   1   28.40   25.90
   9  -3  -1  129.09   35.00
   9  -3  -1  184.18   38.90
   9  -3  -1  161.58   38.80
   9  -3  -1  132.19   36.10
   9  -3  -1  142.29   42.00
   9  -3  -1  181.78   29.90
   9  -3  -1  142.69   42.90
  -9   3   1  154.88   43.80
  -9   3   1  233.08   34.80
  -9   3   1  199.98   27.60
  -9   3   1  239.78   38.70
  -9   3   1  252.27   68.39
  -9   3   1  222.98   36.20
   8  -3  -1  344.47   44.70
   8  -3  -1  353.16   54.39
   8  -3  -1  217.48   33.80
   8  -3  -1  311.07   41.00
   8  -3  -1  272.47   47.70
   8  -3  -1  242.98   40.30
   8  -3  -1  233.98   36.80
   8  -3  -1  244.58   38.50
   8  -3  -1  339.87   39.30
  -8   3   1  306.57   49.30
  -8   3   1  272.87   42.60
  -8   3   1  282.07   30.00
  -8   3   1  288.47   36.80
  -8   3   1  311.17   38.60
  -8   3   1  194.38   34.60
  -8   3   1  315.17   43.50
  -8   3   1  240.28   50.29
  -8   3   1  286.77   40.20
   7  -3  -1   -3.50   17.70
   7  -3  -1   -0.30   22.90
   7  -3  -1  -14.50   17.20
   7  -3  -1  -15.70   23.60
   7  -3  -1   -0.20   13.00
   7  -3  -1   10.40   20.40
   7  -3  -1   27.10   17.80
   7  -3  -1   -6.00   17.30
  -7   3   1    2.30   20.60
  -7   3   1    9.90   11.60
  -7   3   1   28.30   18.30
  -7   3   1  -48.90   40.30
  -7   3   1   45.10   27.20
  -7   3   1   26.70   19.20
  -7   3   1  -18.50   22.30
  -7   3   1  -12.20   15.20
  -7   3   1    2.10   16.10
   6  -3  -1   41.50   16.80
   6  -3  -1   61.79   15.10
   6  -3  -1   62.49   28.10
   6  -3  -1   55.29   20.80
   6  -3  -1   83.89   22.40
   6  -3  -1   97.49   21.20
   6  -3  -1   79.69   28.60
   6  -3  -1   24.20   19.00
   6  -3  -1  -25.80   37.70
  -6   3   1   48.40   26.10
  -6   3   1   73.49   22.80
  -6   3   1   54.19   13.00
  -6   3   1   32.30   20.90
  -6   3   1   57.49   18.20
  -6   3   1   65.89   19.30
  -6   3   1   74.09   27.70
  -6   3   1   43.50   17.60
  -6   3   1   32.30   17.50
   5  -3  -1 1408.56   81.59
   5  -3  -1 1460.85   90.49
   5  -3  -1 1293.97   74.39
   5  -3  -1 1350.16   84.89
   5  -3  -1 1347.27   81.79
   5  -3  -1 1338.77   89.09
   5  -3  -1 1372.66   81.99
   5  -3  -1 1312.57   82.99
   5  -3  -1 1358.56   83.99
  -5   3   1 1394.26   82.89
  -5   3   1 1251.57   76.39
  -5   3   1 1355.46   88.69
  -5   3   1 1373.16   82.39
  -5   3   1 1324.87   88.19
  -5   3   1 1348.47   85.59
  -5   3   1 1298.57   84.59
  -5   3   1 1409.46   82.79
  -5   3   1 1331.37   82.59
   4  -3  -1  455.55   30.20
   4  -3  -1  467.55   37.80
   4  -3  -1  437.06   41.60
   4  -3  -1  470.05   36.10
   4  -3  -1  462.15   36.80
   4  -3  -1  470.95   39.70
   4  -3  -1  527.15   40.20
   4  -3  -1  527.25   41.00
   4  -3  -1  455.55   42.60
  -4   3   1  444.96   34.50
  -4   3   1  468.85   42.00
  -4   3   1  454.75   42.20
  -4   3   1  429.76   37.80
  -4   3   1  400.76   39.80
  -4   3   1  521.05   39.60
  -4   3   1  514.15   39.60
  -4   3   1  456.65   37.90
   3  -3  -1  577.24   42.50
   3  -3  -1  621.34   42.60
   3  -3  -1  578.84   46.60
   3  -3  -1  595.64   46.40
   3  -3  -1  555.14   51.79
   3  -3  -1  602.34   39.30
   3  -3  -1  582.04   41.60
   3  -3  -1  580.84   45.80
  -3   3   1  587.44   42.10
  -3   3   1  579.44   41.00
  -3   3   1  639.84   41.30
  -3   3   1  605.74   46.10
  -3   3   1  587.84   47.10
  -3   3   1  557.34   38.70
  -3   3   1  526.15   45.80
  -3   3   1  588.14   41.20
   2  -3  -1  357.26   28.80
   2  -3  -1  377.56   29.20
   2  -3  -1  343.47   27.30
   2  -3  -1  320.77   25.60
   2  -3  -1  340.57   33.00
   2  -3  -1  298.87   32.00
   2  -3  -1  353.66   28.10
  -2   3   1  348.97   30.50
  -2   3   1  315.07   24.40
  -2   3   1  370.26   28.70
  -2   3   1  335.17   27.20
  -2   3   1  330.67   31.70
  -2   3   1  354.26   28.40
  -2   3   1  329.47   28.00
  -2   3   1  296.97   31.80
   1  -3  -1  401.66   25.70
   1  -3  -1  333.27   26.60
   1  -3  -1  336.17   29.60
   1  -3  -1  351.26   26.30
   1  -3  -1  361.76   30.90
   1  -3  -1  371.66   24.20
   1  -3  -1  348.17   19.60
   1  -3  -1  326.87   26.50
  -1   3   1  360.86   29.60
  -1   3   1  358.66   27.10
  -1   3   1  395.46   25.40
  -1   3   1  305.97   28.90
  -1   3   1  369.86   27.00
  -1   3   1  330.77   24.20
  -1   3   1  385.66   27.00
  -1   3   1  383.46   30.80
   0  -3  -1  746.63   41.40
   0  -3  -1  801.52   46.50
   0  -3  -1  784.02   43.10
   0  -3  -1  759.32   46.30
   0  -3  -1  739.03   45.40
   0  -3  -1  865.81   44.30
   0  -3  -1  804.62   43.90
   0  -3  -1  764.22   41.40
   0   3   1  806.72   44.20
   0   3   1  799.82   45.10
   0   3   1  745.83   44.20
   0   3   1  763.92   43.00
   0   3   1  793.92   43.10
   0   3   1  849.81   44.60
   0   3   1  820.22   46.90
   0   3   1  770.82   45.60
   0   3   1  751.62   52.59
  -1  -3  -1 1483.25   78.59
  -1  -3  -1 1444.26   87.09
  -1  -3  -1 1461.75   77.99
  -1  -3  -1 1424.36   77.29
  -1  -3  -1 1546.75   77.39
   1   3   1 1396.96   81.49
   1   3   1 1493.95   78.69
   1   3   1 1482.75   78.19
   1   3   1 1591.64   81.19
   1   3   1 1553.94   87.69
   1   3   1 1489.85   76.49
   1   3   1 1612.54   78.79
   1   3   1 1499.55   77.39
   1   3   1 1461.05   77.79
   1   3   1 1523.35   79.39
  -2  -3  -1 5664.93  286.77
  -2  -3  -1 5347.27  282.27
  -2  -3  -1 5696.13  282.67
  -2  -3  -1 5068.59  280.87
  -2  -3  -1 5241.68  280.87
  -2  -3  -1 5412.26  290.47
   2   3   1 6296.87  294.77
   2   3   1 5738.13  282.67
   2   3   1 5140.09  281.17
   2   3   1 5602.04  286.87
   2   3   1 5942.51  281.17
   2   3   1 6059.89  279.97
   2   3   1 5723.73  282.77
   2   3   1 5414.36  282.37
   2   3   1 5300.67  281.27
   2   3   1 5810.82  284.27
  -3  -3  -1 4221.58  217.58
  -3  -3  -1 4171.88  220.78
  -3  -3  -1 4557.34  218.88
  -3  -3  -1 4191.28  213.18
  -3  -3  -1 4209.68  217.08
  -3  -3  -1 4352.76  226.58
  -3  -3  -1 4109.79  215.48
  -3  -3  -1 3658.63  216.68
   3   3   1 4006.00  215.48
   3   3   1 4049.89  214.78
   3   3   1 4254.37  220.38
   3   3   1 4443.06  221.08
   3   3   1 4302.97  216.98
   3   3   1 4420.66  217.88
   3   3   1 4488.05  220.58
   3   3   1 4315.77  215.58
  -4  -3  -1  919.61   47.50
  -4  -3  -1  815.02   61.39
  -4  -3  -1  836.12   54.69
  -4  -3  -1  744.53   51.19
  -4  -3  -1  845.02   49.50
  -4  -3  -1  703.93   47.40
  -4  -3  -1  845.72   52.19
  -4  -3  -1  856.51   54.69
  -4  -3  -1  824.42   49.90
   4   3   1  771.62   51.79
   4   3   1  915.91   57.89
   4   3   1  780.52   49.10
   4   3   1  784.02   53.09
   4   3   1  884.31   53.09
   4   3   1  850.31   49.99
   4   3   1  815.92   50.49
   4   3   1  866.91   47.90
   4   3   1  844.12   53.19
   4   3   1  771.22   49.30
  -5  -3  -1   42.40   14.70
  -5  -3  -1   90.99   20.20
  -5  -3  -1   51.59   15.30
  -5  -3  -1   29.90   23.10
  -5  -3  -1   78.79   21.90
  -5  -3  -1   51.19   12.30
  -5  -3  -1   33.70   15.20
  -5  -3  -1   51.79   18.00
  -5  -3  -1   66.59   13.60
  -5  -3  -1   59.69   14.20
   5   3   1   29.90   15.50
   5   3   1   57.79   13.90
   5   3   1   60.39   15.80
   5   3   1   51.59   14.10
   5   3   1   39.60   15.80
   5   3   1   44.30   12.80
   5   3   1   60.59   18.40
   5   3   1   40.20   14.50
   5   3   1   49.20   14.90
  -6  -3  -1  400.26   38.80
  -6  -3  -1  331.17   36.80
  -6  -3  -1  323.17   32.40
  -6  -3  -1  354.86   31.00
  -6  -3  -1  325.57   38.20
  -6  -3  -1  336.17   42.40
  -6  -3  -1  348.67   32.40
  -6  -3  -1  353.16   32.40
  -6  -3  -1  418.26   40.30
   6   3   1  422.66   35.70
   6   3   1  415.06   33.90
   6   3   1  430.56   43.60
   6   3   1  391.46   34.90
   6   3   1  397.06   37.90
   6   3   1  407.96   43.70
   6   3   1  389.96   39.00
   6   3   1  376.46   35.20
   6   3   1  405.66   40.00
   6   3   1  400.96   35.20
  -7  -3  -1   17.90   13.30
  -7  -3  -1   10.90   18.10
  -7  -3  -1   13.00   18.90
  -7  -3  -1    2.80   16.70
  -7  -3  -1   -0.50   12.90
  -7  -3  -1   -6.90   21.70
  -7  -3  -1   16.00   14.00
  -7  -3  -1   22.30   19.20
  -7  -3  -1   23.80   19.80
   7   3   1    9.90   14.90
   7   3   1  -14.30   17.30
   7   3   1   24.20   14.70
   7   3   1    1.90   14.80
   7   3   1   -7.20   14.10
   7   3   1   17.30   16.80
   7   3   1    1.70   13.30
   7   3   1  -14.60   13.60
   7   3   1   18.30   21.30
   7   3   1   -1.20   14.10
  -8  -3  -1   26.80   26.90
  -8  -3  -1   40.40   21.20
  -8  -3  -1   27.00   16.60
  -8  -3  -1   26.00   22.70
  -8  -3  -1   13.90   20.20
  -8  -3  -1   41.20   16.20
  -8  -3  -1    1.00   14.50
  -8  -3  -1   17.50   20.70
  -8  -3  -1   -3.90   17.30
   8   3   1   20.10   17.30
   8   3   1   37.60   24.00
   8   3   1   30.20   23.20
   8   3   1   17.30   16.40
   8   3   1   10.60   16.40
   8   3   1  -17.90   16.20
   8   3   1   -0.80   17.80
   8   3   1   -1.40   16.60
   8   3   1   -6.10   15.60
   8   3   1   -5.20   16.10
  -9  -3  -1  114.89   29.30
  -9  -3  -1  133.89   27.10
  -9  -3  -1   87.89   23.20
  -9  -3  -1  155.28   62.39
  -9  -3  -1  139.89   32.80
  -9  -3  -1  107.49   30.50
   9   3   1  112.89   34.90
   9   3   1  169.08   36.60
   9   3   1  117.49   27.30
   9   3   1  125.79   28.20
   9   3   1   99.99   25.90
   9   3   1  129.89   27.00
   9   3   1  118.19   29.40
   9   3   1   83.59   25.50
   9   3   1   72.19   24.90
   9   3   1   61.69   23.70
 -10  -3  -1  765.82   62.69
 -10  -3  -1  825.32   72.29
 -10  -3  -1  620.74   77.79
 -10  -3  -1  655.13   64.39
 -10  -3  -1  679.53   61.69
 -10  -3  -1  764.12   73.69
  10   3   1  718.73   60.89
  10   3   1  803.02   64.99
  10   3   1  741.13   64.99
  10   3   1  773.32   67.69
  10   3   1  737.33   73.49
  10   3   1  739.63   65.59
  10   3   1  813.92   67.09
  10   3   1  881.51   77.99
 -11  -3  -1  188.18   37.30
 -11  -3  -1  103.59   40.70
 -11  -3  -1  143.39   32.20
 -11  -3  -1   81.59   42.40
 -11  -3  -1   75.79   36.10
 -11  -3  -1  146.09   34.30
  11   3   1   78.79   34.70
  11   3   1   86.09   34.40
  11   3   1  144.89   42.30
 -12  -3  -1   94.99   33.70
 -12  -3  -1  154.18   37.80
 -12  -3  -1   52.19   47.40
  12   3   1  131.69   44.70
  12   3   1   10.80   45.00
  12   3   1   42.00   38.20
  12   3   1   30.30   29.00
  12   3   1  116.79   34.80
  12   3   1   -7.60   39.10
  12   3   1   81.79   34.70
 -13  -3  -1   49.90   50.79
 -13  -3  -1  120.29   39.50
 -13  -3  -1  223.68   49.80
 -13  -3  -1  194.88   42.50
 -13  -3  -1  179.78   56.99
  13   3   1  140.49   38.60
  13   3   1  193.88   47.20
  13   3   1  245.48   53.69
  13   3   1  112.79   45.50
  13   3   1  130.09   41.10
 -14  -3  -1  108.89   52.29
 -14  -3  -1  -65.39   41.50
 -14  -3  -1  -49.10   36.80
 -14  -3  -1   57.39   57.19
  14   3   1   54.59   47.80
  14   3   1   68.89   34.20
  14   3   1   40.30   43.30
  14   3   1   19.60   35.40
  14  -4  -1   57.59   40.20
  14  -4  -1   29.30   45.00
  14  -4  -1   14.50   38.40
 -14   4   1   47.90   54.79
 -14   4   1   19.20   36.30
 -14   4   1   20.50   42.60
  13  -4  -1    4.60   31.80
  13  -4  -1  117.29   58.49
  13  -4  -1   23.20   33.60
  13  -4  -1  -17.70   31.70
 -13   4   1    4.00   33.70
 -13   4   1  -13.10   48.20
 -13   4   1  -18.80   34.50
  12  -4  -1  203.58   45.30
  12  -4  -1  161.48   34.20
  12  -4  -1  191.88   51.49
  12  -4  -1  135.59   44.00
 -12   4   1  120.59   39.70
 -12   4   1   83.79   35.40
 -12   4   1  165.68   47.70
  11  -4  -1  -36.00   31.40
  11  -4  -1   -0.30   27.40
  11  -4  -1  -54.59   24.50
  11  -4  -1   24.90   22.60
  11  -4  -1  -12.60   43.40
 -11   4   1  -19.90   26.80
 -11   4   1    7.70   36.30
 -11   4   1    4.50   24.30
 -11   4   1   13.80   27.40
  10  -4  -1   -5.10   30.00
  10  -4  -1  -16.00   23.80
  10  -4  -1   33.00   30.40
  10  -4  -1   -9.20   23.30
  10  -4  -1   -0.50   25.60
  10  -4  -1   22.40   20.80
  10  -4  -1  -11.40   36.20
 -10   4   1  -10.00   24.40
 -10   4   1   40.70   19.60
 -10   4   1    0.70   34.70
 -10   4   1   -1.00   22.00
   9  -4  -1   63.59   26.30
   9  -4  -1   62.29   29.50
   9  -4  -1  112.79   32.30
   9  -4  -1   80.99   41.00
   9  -4  -1   36.60   44.20
   9  -4  -1  101.89   32.50
   9  -4  -1   47.50   22.90
  -9   4   1   91.39   29.50
  -9   4   1  115.69   29.50
  -9   4   1   99.29   34.40
  -9   4   1  111.39   21.70
  -9   4   1  110.79   38.70
   8  -4  -1  258.77   36.20
   8  -4  -1  268.47   48.50
   8  -4  -1  247.38   36.50
   8  -4  -1  189.38   40.40
   8  -4  -1  321.17   58.09
   8  -4  -1  222.18   39.90
   8  -4  -1  268.87   47.30
   8  -4  -1  246.88   40.60
   8  -4  -1  244.68   39.80
  -8   4   1  146.79   38.90
  -8   4   1  153.88   33.50
  -8   4   1  211.78   33.80
  -8   4   1  207.78   24.70
  -8   4   1  236.88   39.10
  -8   4   1  231.48   40.20
  -8   4   1  286.77   49.00
  -8   4   1  272.37   36.40
   7  -4  -1  114.69   24.60
   7  -4  -1  129.79   29.50
   7  -4  -1  112.79   35.60
   7  -4  -1  111.49   20.10
   7  -4  -1   95.09   26.90
   7  -4  -1   76.99   23.00
  -7   4   1  170.38   31.70
  -7   4   1  119.99   24.10
  -7   4   1  149.69   33.00
  -7   4   1   98.99   24.90
  -7   4   1  115.19   17.70
  -7   4   1   74.79   28.50
  -7   4   1  149.49   37.20
  -7   4   1  104.59   34.30
   6  -4  -1 1114.79   63.59
   6  -4  -1 1107.09   75.79
   6  -4  -1 1147.89   83.29
   6  -4  -1 1071.49   72.09
   6  -4  -1 1037.90   78.29
   6  -4  -1 1108.89   71.99
   6  -4  -1 1170.38   73.09
   6  -4  -1 1045.90   74.09
   6  -4  -1 1119.99   75.59
  -6   4   1 1035.50   61.09
  -6   4   1 1009.30   71.99
  -6   4   1 1141.09   81.79
  -6   4   1 1157.98   73.79
  -6   4   1 1069.59   80.49
  -6   4   1  959.40   67.69
  -6   4   1 1025.20   72.89
  -6   4   1 1067.19   72.79
  -6   4   1 1030.00   76.49
   5  -4  -1  319.97   37.20
   5  -4  -1  324.07   44.80
   5  -4  -1  383.56   41.10
   5  -4  -1  439.06   38.80
   5  -4  -1  387.86   37.30
   5  -4  -1  406.96   41.20
   5  -4  -1  409.76   44.60
   5  -4  -1  359.66   35.50
   5  -4  -1  368.46   28.20
  -5   4   1  430.26   40.40
  -5   4   1  402.56   40.60
  -5   4   1  454.35   39.90
  -5   4   1  459.95   55.99
  -5   4   1  383.76   41.40
  -5   4   1  358.76   43.60
  -5   4   1  405.16   45.30
  -5   4   1  362.46   38.10
   4  -4  -1  242.98   28.40
   4  -4  -1  246.08   27.60
   4  -4  -1  239.28   35.90
   4  -4  -1  258.97   31.90
   4  -4  -1  243.68   30.30
   4  -4  -1  246.48   29.80
   4  -4  -1  229.58   28.80
   4  -4  -1  251.87   34.70
  -4   4   1  313.77   38.60
  -4   4   1  253.57   29.80
  -4   4   1  263.87   29.90
  -4   4   1  265.37   33.50
  -4   4   1  252.47   31.70
  -4   4   1  188.08   30.90
  -4   4   1  220.68   26.70
  -4   4   1  239.98   30.50
   3  -4  -1   21.70   12.00
   3  -4  -1   28.90   12.90
   3  -4  -1   34.90   15.40
   3  -4  -1   13.00   12.90
   3  -4  -1   27.20   19.30
   3  -4  -1    9.70   17.50
   3  -4  -1   25.60   14.50
   3  -4  -1   29.60   15.70
  -3   4   1   25.70   15.50
  -3   4   1    0.10   14.00
  -3   4   1   31.80   18.80
  -3   4   1   36.30   15.70
  -3   4   1   33.60   12.60
  -3   4   1   13.50   12.90
  -3   4   1   27.10   13.30
  -3   4   1   37.10   20.30
   2  -4  -1  483.35   38.90
   2  -4  -1  513.15   44.10
   2  -4  -1  578.64   45.00
   2  -4  -1  515.15   29.20
   2  -4  -1  508.15   37.70
   2  -4  -1  563.14   41.80
   2  -4  -1  552.34   35.90
   2  -4  -1  506.95   39.10
  -2   4   1  569.94   37.40
  -2   4   1  569.04   40.90
  -2   4   1  493.05   40.30
  -2   4   1  502.05   42.30
  -2   4   1  510.85   35.60
  -2   4   1  485.55   42.30
  -2   4   1  528.05   38.90
  -2   4   1  534.45   40.70
   1  -4  -1  746.73   41.10
   1  -4  -1  862.31   47.90
   1  -4  -1  706.33   47.40
   1  -4  -1  807.82   46.70
   1  -4  -1  743.63   50.99
   1  -4  -1  767.12   51.69
   1  -4  -1  768.12   44.80
  -1   4   1  813.22   48.50
  -1   4   1  721.13   49.60
  -1   4   1  788.12   47.60
  -1   4   1  796.52   46.50
  -1   4   1  835.12   51.99
  -1   4   1  796.32   45.60
  -1   4   1  764.32   48.80
   0  -4  -1   58.29   11.00
   0  -4  -1   59.39   14.80
   0  -4  -1   54.49   15.00
   0  -4  -1   79.49   15.30
   0  -4  -1   78.69   10.90
   0  -4  -1   74.29    8.50
   0  -4  -1   66.19    9.90
   0  -4  -1   61.99    8.20
   0   4   1   69.49   15.20
   0   4   1   50.49   11.10
   0   4   1   51.19   13.30
   0   4   1   65.19   12.10
   0   4   1   70.59   10.60
   0   4   1   61.69   19.40
   0   4   1   65.29   12.20
   0   4   1   80.79    8.90
  -1  -4  -1  392.26   29.60
  -1  -4  -1  358.36   24.20
  -1  -4  -1  365.86   24.40
  -1  -4  -1  420.46   41.20
  -1  -4  -1  399.56   27.30
   1   4   1  398.96   27.70
   1   4   1  385.36   28.80
   1   4   1  376.96   23.80
   1   4   1  413.56   39.70
   1   4   1  376.66   24.40
   1   4   1  404.46   25.80
   1   4   1  394.26   24.50
   1   4   1  362.46   29.90
   1   4   1  408.76   29.60
   1   4   1  379.06   24.90
  -2  -4  -1   13.40    7.90
  -2  -4  -1   14.70   10.40
  -2  -4  -1    9.80   15.50
  -2  -4  -1   -2.60    5.60
  -2  -4  -1    9.60    8.00
  -2  -4  -1    3.50    6.00
   2   4   1    1.80    6.40
   2   4   1    5.60    4.50
   2   4   1   14.40   15.30
   2   4   1    0.40   11.70
   2   4   1    9.10    9.10
   2   4   1  -10.10    7.20
   2   4   1   -4.70    5.80
   2   4   1   -0.10   10.60
   2   4   1    0.70    6.00
   2   4   1    7.70    8.40
  -3  -4  -1   47.90   20.60
  -3  -4  -1   61.69   13.20
  -3  -4  -1   70.39   13.00
  -3  -4  -1   42.90    8.90
  -3  -4  -1   57.39    9.20
   3   4   1   49.50    8.20
   3   4   1   51.59   12.50
   3   4   1   33.50   14.30
   3   4   1   43.40    9.70
   3   4   1   62.69   12.70
   3   4   1   59.99   17.00
   3   4   1   39.00    9.80
   3   4   1   54.99   17.80
   3   4   1   75.19   13.90
   3   4   1   53.69   10.20
   3   4   1   46.30   17.00
  -4  -4  -1  105.79   12.90
  -4  -4  -1   90.39   13.60
  -4  -4  -1   94.19   17.50
  -4  -4  -1  106.19   25.90
  -4  -4  -1   98.59   13.80
  -4  -4  -1  112.99   14.50
  -4  -4  -1   90.79   18.20
  -4  -4  -1   88.79   15.60
  -4  -4  -1  124.59   19.00
   4   4   1  101.59   14.90
   4   4   1  122.29   16.30
   4   4   1  100.89   20.40
   4   4   1  112.79   18.40
   4   4   1  103.19   15.30
   4   4   1   90.99   20.80
   4   4   1  109.79   12.70
   4   4   1  124.39   38.50
   4   4   1  122.99   18.80
   4   4   1  126.59   17.90
  -5  -4  -1 1101.19   69.89
  -5  -4  -1  987.50   64.79
  -5  -4  -1 1136.39   67.39
  -5  -4  -1 1070.09   71.19
  -5  -4  -1 1078.89   69.49
  -5  -4  -1 1169.28   62.89
  -5  -4  -1 1293.07   85.19
  -5  -4  -1 1171.58   66.19
  -5  -4  -1 1010.00   71.09
   5   4   1 1176.88   70.59
   5   4   1 1127.79   63.39
   5   4   1 1200.98   73.39
   5   4   1 1041.50   66.69
   5   4   1 1148.59   71.19
   5   4   1 1176.38   67.49
   5   4   1 1141.49   67.09
   5   4   1 1249.28   77.49
   5   4   1 1124.09   68.19
   5   4   1 1259.17   71.79
  -6  -4  -1   36.70   21.20
  -6  -4  -1    5.80   24.90
  -6  -4  -1   34.00   11.80
  -6  -4  -1   15.30   14.70
  -6  -4  -1   18.20   13.00
  -6  -4  -1   30.70   18.20
  -6  -4  -1   30.50   17.80
  -6  -4  -1   28.90   13.20
   6   4   1   -7.50   11.80
   6   4   1   16.40   16.40
   6   4   1   14.30   13.70
   6   4   1   37.60   15.00
   6   4   1   30.90   15.80
   6   4   1    9.70   16.40
   6   4   1    6.10   16.40
   6   4   1   27.60   14.80
  -7  -4  -1   -1.00   20.90
  -7  -4  -1    4.70   21.90
  -7  -4  -1    6.30   14.50
  -7  -4  -1   17.60   15.30
  -7  -4  -1   28.10   20.40
  -7  -4  -1   15.20   14.10
  -7  -4  -1    4.70   17.10
   7   4   1   -7.50   15.30
   7   4   1   14.70   14.70
   7   4   1  -22.40   18.10
   7   4   1  -12.90   12.30
   7   4   1    7.20   14.10
   7   4   1  -21.00   12.70
   7   4   1   20.20   18.90
   7   4   1    6.70   15.50
  -8  -4  -1  -25.60   12.20
  -8  -4  -1   20.00   18.40
  -8  -4  -1  -18.30   13.10
  -8  -4  -1   11.40   20.10
  -8  -4  -1  -13.90   13.80
  -8  -4  -1  -23.70   26.20
  -8  -4  -1   45.70   25.30
  -8  -4  -1  -42.20   19.60
   8   4   1  -16.60   14.70
   8   4   1  -11.60   18.70
   8   4   1  -13.10   16.20
   8   4   1  -22.80   16.40
   8   4   1   -8.80   15.00
   8   4   1    4.80   16.90
   8   4   1  -26.20   18.90
   8   4   1   -5.60   20.10
   8   4   1  -23.50   16.10
   8   4   1    0.70   15.50
  -9  -4  -1  133.49   31.30
  -9  -4  -1  117.49   24.50
  -9  -4  -1  197.38   49.50
  -9  -4  -1  154.28   32.80
  -9  -4  -1  216.28   42.60
   9   4   1  141.19   35.20
   9   4   1  148.39   29.70
   9   4   1  156.98   28.20
   9   4   1  110.39   34.30
   9   4   1  108.89   28.20
   9   4   1  147.39   29.30
   9   4   1  108.59   30.10
   9   4   1  198.68   29.90
   9   4   1  190.98   33.20
 -10  -4  -1  505.25   50.99
 -10  -4  -1  380.66   68.89
 -10  -4  -1  538.15   50.39
 -10  -4  -1  503.65   56.49
  10   4   1  353.46   48.80
  10   4   1  412.36   54.49
  10   4   1  533.75   53.79
  10   4   1  541.65   52.79
  10   4   1  449.86   52.79
  10   4   1  534.75   64.89
 -11  -4  -1    4.70   22.90
 -11  -4  -1   78.29   37.60
 -11  -4  -1   47.90   45.30
 -11  -4  -1   43.00   42.50
 -11  -4  -1   37.90   26.40
 -11  -4  -1   28.50   44.70
  11   4   1   93.09   38.10
  11   4   1   47.20   27.60
  11   4   1   44.80   30.40
  11   4   1  -22.10   26.70
  11   4   1   59.79   39.20
  11   4   1   29.90   28.60
  11   4   1   69.19   29.20
 -12  -4  -1   76.99   41.40
 -12  -4  -1   -2.00   27.00
 -12  -4  -1   67.79   30.70
 -12  -4  -1  -20.60   39.70
 -12  -4  -1  -55.49   35.30
 -12  -4  -1  -47.60   28.70
  12   4   1   61.49   33.70
  12   4   1  -46.20   67.89
  12   4   1    1.00   35.30
  12   4   1   34.20   30.00
  12   4   1   17.30   32.60
  12   4   1   43.00   29.20
  12   4   1   51.29   31.90
 -13  -4  -1  -21.60   35.10
 -13  -4  -1   27.10   48.90
 -13  -4  -1   13.80   32.20
 -13  -4  -1   -7.90   43.20
  13   4   1   -7.10   53.49
  13   4   1  -66.79   34.80
  13   4   1  -43.30   26.40
  13   4   1   -5.80   32.00
  13   4   1  -43.60   58.49
  13   4   1   23.80   33.10
 -14  -4  -1  -21.70   37.00
 -14  -4  -1   26.40   46.10
 -14  -4  -1  -38.50   45.60
 -14  -4  -1  -89.89   51.49
  14   4   1  -23.40   31.70
  14   4   1   22.10   32.50
  14   4   1   16.50   33.20
  14   4   1   62.19   53.49
  14  -5  -1  -12.10   35.50
  14  -5  -1   20.70   41.30
  14  -5  -1   84.69   87.59
  14  -5  -1  -60.69   37.20
 -14   5   1   74.09   45.10
 -14   5   1   35.10   52.39
 -14   5   1  -57.59   36.20
  13  -5  -1   20.70   51.59
  13  -5  -1   10.70   37.80
  13  -5  -1  -43.50   32.70
 -13   5   1   10.60   46.70
 -13   5   1   46.60   40.40
 -13   5   1   21.00   36.80
  12  -5  -1   20.60   29.40
  12  -5  -1    9.90   47.50
  12  -5  -1   68.49   36.20
  12  -5  -1   -7.30   30.50
 -12   5   1   35.50   32.30
 -12   5   1  -45.80   43.20
 -12   5   1   55.49   33.00
 -12   5   1   21.90   34.60
  11  -5  -1   13.80   23.00
  11  -5  -1    3.30   31.30
  11  -5  -1  -10.80   36.50
  11  -5  -1  -20.00   30.20
 -11   5   1  -21.00   26.60
 -11   5   1    2.90   25.50
 -11   5   1    2.10   49.50
 -11   5   1   38.80   32.00
  10  -5  -1   38.40   34.00
  10  -5  -1   57.49   23.70
  10  -5  -1   61.29   37.10
  10  -5  -1   30.30   30.30
  10  -5  -1   22.50   35.60
 -10   5   1   84.39   31.80
 -10   5   1   82.49   22.40
 -10   5   1   19.20   34.60
 -10   5   1   49.99   32.10
 -10   5   1   90.59   30.30
 -10   5   1   98.29   44.70
   9  -5  -1  140.39   31.90
   9  -5  -1  141.69   39.40
   9  -5  -1  144.09   39.60
   9  -5  -1  153.88   36.20
   9  -5  -1  181.98   46.10
   9  -5  -1  100.39   26.10
   9  -5  -1  179.18   36.40
  -9   5   1  121.49   33.70
  -9   5   1  218.68   36.30
  -9   5   1  150.18   40.60
  -9   5   1  155.18   22.70
  -9   5   1  140.59   33.10
   8  -5  -1    1.70   16.20
   8  -5  -1   77.59   52.59
   8  -5  -1   -1.20   20.40
   8  -5  -1   -6.40   21.00
   8  -5  -1  -16.60   22.40
   8  -5  -1   30.50   29.60
   8  -5  -1   13.10   44.70
  -8   5   1   30.10   14.10
  -8   5   1   14.50   19.70
  -8   5   1   19.60   24.20
  -8   5   1    5.60   25.90
  -8   5   1   31.30   22.30
  -8   5   1   -6.70   25.60
  -8   5   1   72.69   35.50
   7  -5  -1  235.08   37.60
   7  -5  -1  300.67   38.50
   7  -5  -1  351.66   30.90
   7  -5  -1  255.27   35.80
   7  -5  -1  311.77   46.50
   7  -5  -1  243.68   44.90
   7  -5  -1  253.17   34.80
   7  -5  -1  185.38   37.30
   7  -5  -1  253.87   39.20
  -7   5   1  241.18   39.70
  -7   5   1  265.37   37.20
  -7   5   1  252.67   38.20
  -7   5   1  246.88   34.20
  -7   5   1  320.87   53.29
  -7   5   1  215.48   45.90
  -7   5   1  228.58   35.10
  -7   5   1  284.77   26.00
  -7   5   1  307.17   42.10
   6  -5  -1  764.62   56.69
   6  -5  -1  726.73   54.69
   6  -5  -1  721.33   63.59
   6  -5  -1  713.63   58.09
   6  -5  -1  728.93   76.49
   6  -5  -1  651.33   57.39
   6  -5  -1  605.34   58.39
   6  -5  -1  672.43   55.29
   6  -5  -1  724.43   44.80
  -6   5   1  710.73   56.79
  -6   5   1  769.32   66.79
  -6   5   1  570.14   70.39
  -6   5   1  722.63   58.59
  -6   5   1  663.83   77.79
  -6   5   1  622.44   60.29
  -6   5   1  664.33   51.29
   5  -5  -1  255.27   36.90
   5  -5  -1  255.67   22.60
   5  -5  -1  220.08   32.70
   5  -5  -1  266.97   35.30
   5  -5  -1  246.48   38.40
   5  -5  -1  243.78   30.20
   5  -5  -1  206.58   29.90
   5  -5  -1  311.57   36.80
   5  -5  -1  326.97   32.20
  -5   5   1  149.29   41.60
  -5   5   1  195.38   29.70
  -5   5   1  233.28   37.50
  -5   5   1  229.78   33.10
  -5   5   1  198.08   39.20
  -5   5   1  258.37   36.20
  -5   5   1  297.47   35.00
  -5   5   1  261.17   33.90
   4  -5  -1   -1.00   16.90
   4  -5  -1   13.50   14.90
   4  -5  -1   18.00   17.60
   4  -5  -1   41.60   15.10
   4  -5  -1   44.00   22.90
   4  -5  -1   19.30   19.50
   4  -5  -1    2.50   15.30
  -4   5   1    8.50   20.10
  -4   5   1   16.50   15.40
  -4   5   1   54.49   18.40
  -4   5   1   16.90   17.90
  -4   5   1   31.10   23.30
  -4   5   1   25.80   18.30
  -4   5   1   12.70   14.20
  -4   5   1   31.10   17.70
   3  -5  -1  224.48   24.60
   3  -5  -1  181.58   31.30
   3  -5  -1  221.18   29.90
   3  -5  -1  188.08   30.80
   3  -5  -1  209.08   26.40
   3  -5  -1  171.08   15.80
   3  -5  -1  190.18   24.10
   3  -5  -1  208.68   28.10
  -3   5   1  245.38   30.50
  -3   5   1  170.48   29.10
  -3   5   1  214.68   30.60
  -3   5   1  210.28   27.00
  -3   5   1  206.28   25.30
  -3   5   1  215.28   26.30
  -3   5   1  202.08   28.70
  -3   5   1  234.78   27.50
   2  -5  -1  298.77   26.20
   2  -5  -1  275.17   27.70
   2  -5  -1  287.37   29.50
   2  -5  -1  284.07   35.20
   2  -5  -1  314.57   19.50
   2  -5  -1  318.57   32.30
   2  -5  -1  272.87   34.60
   2  -5  -1  299.57   29.80
  -2   5   1  350.86   27.60
  -2   5   1  333.97   30.70
  -2   5   1  312.47   33.30
  -2   5   1  329.47   35.60
  -2   5   1  266.57   30.30
  -2   5   1  289.77   28.90
  -2   5   1  337.07   35.30
  -2   5   1  317.37   32.00
   1  -5  -1  176.28   26.30
   1  -5  -1  186.58   26.00
   1  -5  -1  169.78   22.80
   1  -5  -1  203.58   19.00
   1  -5  -1  190.18   21.90
   1  -5  -1  223.58   22.60
   1  -5  -1  164.28   14.00
   1  -5  -1  217.18   24.20
  -1   5   1  142.49   20.30
  -1   5   1  167.98   25.80
  -1   5   1  212.58   24.80
  -1   5   1  164.98   14.40
  -1   5   1  205.88   21.90
  -1   5   1  188.98   20.60
  -1   5   1  172.98   20.60
  -1   5   1  179.28   24.20
   0  -5  -1 1994.30  102.99
   0  -5  -1 1956.90  105.19
   0  -5  -1 2173.88  104.59
   0  -5  -1 2015.90  102.89
   0  -5  -1 2012.00  106.29
   0  -5  -1 1879.01  106.19
   0   5   1 1917.11  105.79
   0   5   1 1819.12  105.59
   0   5   1 2000.60  103.19
   0   5   1 2143.79  110.99
   0   5   1 1828.12  116.99
   0   5   1 2092.19  105.69
   0   5   1 2004.50  110.29
   0   5   1 1970.80  108.99
   0   5   1 2041.60  107.09
  -1  -5  -1  363.96   25.40
  -1  -5  -1  398.36   24.90
  -1  -5  -1  411.66   29.30
  -1  -5  -1  447.16   45.10
  -1  -5  -1  338.57   28.80
   1   5   1  340.77   30.80
   1   5   1  389.46   41.30
   1   5   1  329.27   24.60
   1   5   1  364.36   26.90
   1   5   1  358.16   25.20
   1   5   1  396.16   25.20
   1   5   1  343.47   30.20
   1   5   1  400.06   32.10
   1   5   1  345.07   25.50
   1   5   1  364.96   29.60
  -2  -5  -1  340.97   25.30
  -2  -5  -1  309.97   29.30
  -2  -5  -1  318.37   23.30
  -2  -5  -1  373.56   44.40
  -2  -5  -1  344.07   24.10
   2   5   1  349.17   25.90
   2   5   1  363.96   24.00
   2   5   1  375.96   32.50
   2   5   1  301.87   32.20
   2   5   1  361.96   29.50
   2   5   1  342.57   26.20
   2   5   1  347.77   26.70
   2   5   1  337.77   21.40
   2   5   1  329.17   35.80
   2   5   1  382.46   32.90
  -3  -5  -1  233.38   20.10
  -3  -5  -1  231.18   21.80
  -3  -5  -1  268.67   37.10
  -3  -5  -1  207.68   22.60
  -3  -5  -1  210.78   24.80
  -3  -5  -1  214.18   19.00
   3   5   1  222.68   22.50
   3   5   1  264.17   20.80
   3   5   1  244.38   29.20
   3   5   1  244.78   30.80
   3   5   1  249.18   21.60
   3   5   1  229.58   24.00
   3   5   1  231.68   30.50
   3   5   1  216.88   32.80
   3   5   1  279.17   24.20
  -4  -5  -1  247.78   23.00
  -4  -5  -1  238.48   25.90
  -4  -5  -1  219.68   21.60
  -4  -5  -1  254.07   37.40
  -4  -5  -1  286.67   25.60
   4   5   1  244.98   23.50
   4   5   1  249.28   32.50
   4   5   1  302.47   29.10
   4   5   1  264.07   30.70
   4   5   1  248.18   23.60
   4   5   1  267.97   24.10
   4   5   1  281.87   34.80
   4   5   1  272.07   27.50
   4   5   1  255.67   26.80
   4   5   1  198.28   32.60
  -5  -5  -1  758.32   49.90
  -5  -5  -1  822.52   53.39
  -5  -5  -1  769.32   52.19
  -5  -5  -1  821.02   44.50
  -5  -5  -1  806.02   49.70
  -5  -5  -1  805.32   54.89
  -5  -5  -1  814.92   54.89
  -5  -5  -1  891.01   73.69
  -5  -5  -1  835.02   48.60
   5   5   1  807.72   59.19
   5   5   1  763.32   58.69
   5   5   1  788.32   45.30
   5   5   1  872.41   55.69
   5   5   1  797.02   50.99
   5   5   1  787.32   51.49
   5   5   1  922.71   62.19
   5   5   1  781.22   54.29
   5   5   1  674.33   58.69
   5   5   1  789.92   53.69
  -6  -5  -1   26.70   16.80
  -6  -5  -1   15.30   15.60
  -6  -5  -1   10.80   11.80
  -6  -5  -1    8.00    8.60
  -6  -5  -1    9.00   17.50
  -6  -5  -1   33.80   12.20
  -6  -5  -1    7.70   11.70
  -6  -5  -1   -8.40   12.70
  -6  -5  -1   -9.70   22.10
   6   5   1    7.90   16.20
   6   5   1   13.00   15.40
   6   5   1   15.30   10.20
   6   5   1   -3.90   11.90
   6   5   1   -0.40   12.30
   6   5   1   -4.40   18.50
   6   5   1   -5.40   13.40
   6   5   1   -7.10   16.70
   6   5   1    6.30   12.30
   6   5   1   28.60   17.90
  -7  -5  -1   63.39   21.00
  -7  -5  -1   47.30   15.30
  -7  -5  -1   25.80   15.70
  -7  -5  -1   15.90   22.20
  -7  -5  -1   57.49   13.30
  -7  -5  -1   25.60   25.90
  -7  -5  -1   45.30   29.60
   7   5   1   29.10   13.40
   7   5   1   15.80   17.10
   7   5   1   71.29   22.90
   7   5   1   28.20   17.30
   7   5   1   23.00   15.40
   7   5   1   28.60   18.90
   7   5   1   23.60   19.40
   7   5   1   43.90   20.10
   7   5   1   27.40   16.40
  -8  -5  -1  246.18   49.99
  -8  -5  -1  414.66   46.80
  -8  -5  -1  340.67   45.50
  -8  -5  -1  313.67   40.20
  -8  -5  -1  479.35   47.10
  -8  -5  -1  298.37   38.50
   8   5   1  356.46   41.20
   8   5   1  363.66   44.20
   8   5   1  351.06   35.10
   8   5   1  408.36   43.30
   8   5   1  325.17   39.30
   8   5   1  471.35   41.70
   8   5   1  417.66   40.40
  -9  -5  -1  376.56   47.00
  -9  -5  -1  329.07   36.40
  -9  -5  -1  471.55   69.29
  -9  -5  -1  357.06   42.40
  -9  -5  -1  389.76   50.79
  -9  -5  -1  385.36   48.90
   9   5   1  312.37   41.10
   9   5   1  340.37   43.80
   9   5   1  303.77   42.70
   9   5   1  323.57   42.40
   9   5   1  416.46   47.30
   9   5   1  313.47   44.90
   9   5   1  391.56   49.99
   9   5   1  309.97   40.70
 -10  -5  -1  276.77   44.90
 -10  -5  -1  287.27   40.40
 -10  -5  -1  344.67   62.69
 -10  -5  -1  294.87   47.20
 -10  -5  -1  261.47   58.29
 -10  -5  -1  245.38   34.20
  10   5   1  329.67   43.80
  10   5   1  304.97   47.60
  10   5   1  267.07   42.20
  10   5   1  325.87   48.60
  10   5   1  382.66   48.60
  10   5   1  334.97   42.70
 -11  -5  -1   -6.80   32.20
 -11  -5  -1   10.70   38.10
 -11  -5  -1   51.89   40.50
 -11  -5  -1  -22.00   33.00
 -11  -5  -1    5.20   20.90
 -11  -5  -1  -54.89   27.60
  11   5   1  -45.40   30.80
  11   5   1  -42.00   36.60
  11   5   1   43.70   27.00
  11   5   1   -6.80   26.00
  11   5   1   29.80   27.60
  11   5   1    3.60   23.80
  11   5   1   52.49   26.50
 -12  -5  -1  -61.49   24.90
 -12  -5  -1  -30.60   37.80
 -12  -5  -1   10.40   36.00
  12   5   1  -31.00   25.40
  12   5   1  -81.59   41.30
  12   5   1   19.50   34.50
  12   5   1   47.90   31.40
  12   5   1  -11.30   24.60
  12   5   1   59.69   32.00
 -13  -5  -1    3.10   33.70
 -13  -5  -1    1.50   42.60
 -13  -5  -1  -24.80   37.60
 -13  -5  -1   70.89   53.69
  13   5   1   42.90   39.50
  13   5   1   -2.80   27.30
  13   5   1   50.09   34.60
  13   5   1  -24.50   27.50
  13   5   1    0.90   50.39
  13   5   1   15.80   34.90
 -14  -5  -1   -2.70   49.80
 -14  -5  -1   18.80   48.50
 -14  -5  -1  -24.40   46.10
  14   5   1   19.60   33.50
  13  -6  -1  -52.59   37.40
  13  -6  -1  -56.59   49.30
  13  -6  -1   27.50   37.90
 -13   6   1   38.60   39.40
 -13   6   1    2.30   33.30
 -13   6   1  -45.10   41.30
 -13   6   1    1.70   35.20
  12  -6  -1  -44.60   26.70
  12  -6  -1   -9.70   33.40
  12  -6  -1    3.90   49.00
  12  -6  -1    3.90   28.40
 -12   6   1   12.40   43.80
 -12   6   1   11.40   33.10
 -12   6   1   64.99   39.50
  11  -6  -1   34.80   34.00
  11  -6  -1   50.09   27.00
  11  -6  -1   67.99   47.00
  11  -6  -1   15.00   34.50
 -11   6   1   69.39   43.40
 -11   6   1  -32.90   24.90
 -11   6   1   30.30   35.10
 -11   6   1   93.89   30.70
  10  -6  -1   24.20   30.80
  10  -6  -1   -5.40   38.60
  10  -6  -1   41.70   46.40
  10  -6  -1  106.89   38.80
 -10   6   1   94.99   32.20
 -10   6   1  120.19   38.30
 -10   6   1  120.29   21.90
 -10   6   1   99.69   33.10
 -10   6   1  104.39   44.50
   9  -6  -1  123.09   34.40
   9  -6  -1   35.70   21.40
   9  -6  -1   29.20   28.90
   9  -6  -1  111.39   43.70
   9  -6  -1   86.09   41.40
  -9   6   1   68.49   43.10
  -9   6   1    7.60   24.10
  -9   6   1   48.20   31.80
  -9   6   1   46.90   16.50
  -9   6   1   50.19   39.20
  -9   6   1   61.59   31.10
   8  -6  -1   26.40   33.80
   8  -6  -1    2.80   27.80
   8  -6  -1    8.00   25.60
   8  -6  -1   62.29   30.80
   8  -6  -1   -2.90   25.00
   8  -6  -1   32.80   18.30
  -8   6   1   45.80   33.50
  -8   6   1    5.90   22.70
  -8   6   1  -14.80   20.20
  -8   6   1    9.10   14.00
  -8   6   1   33.00   27.50
  -8   6   1  -22.50   31.30
  -8   6   1   23.80   23.90
   7  -6  -1  234.18   39.70
   7  -6  -1  251.47   28.80
   7  -6  -1  156.68   38.50
   7  -6  -1  334.87   52.69
   7  -6  -1  182.88   38.20
   7  -6  -1  272.37   49.70
   7  -6  -1  171.78   30.90
   7  -6  -1  243.18   36.70
  -7   6   1  257.77   38.90
  -7   6   1  188.38   46.40
  -7   6   1  270.17   46.80
  -7   6   1  244.68   37.10
  -7   6   1  190.68   36.50
  -7   6   1  228.88   34.40
   6  -6  -1  108.69   34.20
   6  -6  -1  177.78   30.60
   6  -6  -1  149.39   19.20
   6  -6  -1  145.39   33.10
   6  -6  -1  170.48   31.60
   6  -6  -1  128.19   28.40
  -6   6   1  154.18   33.40
  -6   6   1  179.48   31.90
  -6   6   1  180.08   32.60
  -6   6   1  100.09   26.00
  -6   6   1   67.89   30.90
   5  -6  -1  328.27   39.70
   5  -6  -1  365.56   49.20
   5  -6  -1  344.67   40.10
   5  -6  -1  323.37   48.10
   5  -6  -1  278.47   39.10
   5  -6  -1  289.17   34.20
  -5   6   1  261.07   34.60
  -5   6   1  333.77   46.00
  -5   6   1  362.46   47.90
  -5   6   1  259.67   41.80
  -5   6   1  320.27   38.20
  -5   6   1  264.17   37.90
  -5   6   1  287.77   39.60
  -5   6   1  327.07   33.90
   4  -6  -1  275.97   33.10
   4  -6  -1  287.27   35.20
   4  -6  -1  283.77   41.70
   4  -6  -1  249.68   34.30
   4  -6  -1  240.78   38.70
   4  -6  -1  230.08   39.70
   4  -6  -1  261.37   29.70
   4  -6  -1  254.27   20.50
  -4   6   1  258.17   34.70
  -4   6   1  226.48   31.00
  -4   6   1  274.17   31.40
  -4   6   1  275.77   58.39
  -4   6   1  255.77   36.60
  -4   6   1  272.57   32.70
  -4   6   1  300.17   37.80
  -4   6   1  324.17   35.80
   3  -6  -1  -18.90   18.40
   3  -6  -1    2.90   10.90
   3  -6  -1    0.80   19.30
   3  -6  -1   -2.80   14.00
   3  -6  -1   -2.40    6.20
   3  -6  -1    6.30   14.50
   3  -6  -1  -14.20   14.20
   3  -6  -1    9.50   13.60
  -3   6   1  -10.40   13.50
  -3   6   1   22.10   16.10
  -3   6   1  -11.10   13.00
  -3   6   1  -13.10   12.00
  -3   6   1   14.50   19.80
  -3   6   1   -6.40   14.00
  -3   6   1   21.80   21.30
  -3   6   1   -6.40   15.60
   2  -6  -1   22.80   15.20
   2  -6  -1   44.80   15.20
   2  -6  -1   62.39   22.20
   2  -6  -1   66.09   17.60
   2  -6  -1   43.10   21.80
   2  -6  -1   60.89    9.10
   2  -6  -1   20.30   17.30
  -2   6   1   49.20   16.30
  -2   6   1   39.90   18.80
  -2   6   1   61.99   22.40
  -2   6   1   43.70   19.60
  -2   6   1   43.00   17.40
  -2   6   1    4.30   18.70
  -2   6   1   60.99   16.70
  -2   6   1   49.40   15.20
   1  -6  -1 1558.94   97.29
   1  -6  -1 1550.74   90.19
   1  -6  -1 1693.63   98.39
   1  -6  -1 1622.64   86.29
   1  -6  -1 1640.44   93.49
   1  -6  -1 1720.03   89.69
   1  -6  -1 1845.42   92.29
  -1   6   1 1628.64   96.39
  -1   6   1 1653.93   92.39
  -1   6   1 1696.33   94.79
  -1   6   1 1672.33   86.59
  -1   6   1 1514.25  111.99
  -1   6   1 1554.74   95.99
  -1   6   1 1764.72   99.79
  -1   6   1 1636.14   91.59
   0  -6  -1  888.21   54.49
   0  -6  -1  941.81   51.49
   0  -6  -1 1036.30   53.89
   0  -6  -1  943.41   56.09
   0  -6  -1  875.31   55.49
   0  -6  -1  903.61   51.59
   0  -6  -1  998.50   60.69
   0  -6  -1  925.91   61.59
   0   6   1  987.00   55.49
   0   6   1  878.91   70.79
   0   6   1  956.30   57.39
   0   6   1  923.91   55.49
   0   6   1  969.60   62.49
   0   6   1  881.31   60.79
   0   6   1  925.81   55.59
   0   6   1  950.30   55.59
   0   6   1  936.31   52.19
   0   6   1  900.01   60.99
  -1  -6  -1    4.20    8.00
  -1  -6  -1   -3.50    7.80
  -1  -6  -1   -1.70   16.00
  -1  -6  -1  -28.10   18.90
  -1  -6  -1  -16.90   10.50
  -1  -6  -1   -7.30    8.50
   1   6   1  -16.70   11.40
   1   6   1   -3.90    9.50
   1   6   1  -12.20   18.30
   1   6   1  -11.50   12.40
   1   6   1   11.10   14.60
   1   6   1    4.00    8.70
   1   6   1    2.30    8.50
   1   6   1   -0.60    8.30
   1   6   1   -3.80   13.60
   1   6   1   -5.30    7.70
  -2  -6  -1   93.89   14.50
  -2  -6  -1   71.59   12.80
  -2  -6  -1   74.19   11.80
  -2  -6  -1   81.99   13.60
  -2  -6  -1   40.90   22.70
   2   6   1   91.29   20.00
   2   6   1   55.19   17.70
   2   6   1   56.19   22.50
   2   6   1   88.69   14.50
   2   6   1   86.89   13.10
   2   6   1   78.99   10.00
   2   6   1   84.09   20.10
   2   6   1   80.29   14.80
   2   6   1   54.49   13.60
  -3  -6  -1  668.03   43.30
  -3  -6  -1  681.73   45.40
  -3  -6  -1  724.63   44.20
  -3  -6  -1  726.73   49.80
  -3  -6  -1  744.83   67.59
  -3  -6  -1  714.73   46.60
   3   6   1  723.53   47.40
   3   6   1  721.43   53.69
   3   6   1  802.32   45.00
   3   6   1  682.83   45.10
   3   6   1  721.93   46.60
   3   6   1  805.82   53.29
   3   6   1  666.33   53.39
   3   6   1  740.13   49.40
   3   6   1  743.23   61.09
  -4  -6  -1 1993.50  107.69
  -4  -6  -1 1964.40  104.99
  -4  -6  -1 1778.72  103.99
  -4  -6  -1 1686.43  106.69
  -4  -6  -1 2103.19  128.69
   4   6   1 1942.01  113.39
   4   6   1 1747.73  115.29
   4   6   1 1961.10  106.29
   4   6   1 1949.41  121.49
   4   6   1 2056.29  115.59
   4   6   1 1954.10  109.49
   4   6   1 2024.50  108.89
   4   6   1 2069.69  105.89
   4   6   1 1998.60  108.19
  -5  -6  -1  607.44   41.20
  -5  -6  -1  604.34   44.30
  -5  -6  -1  593.04   46.40
  -5  -6  -1  657.43   68.19
  -5  -6  -1  555.54   40.20
  -5  -6  -1  613.44   45.90
   5   6   1  582.94   53.49
   5   6   1  640.84   54.29
   5   6   1  636.94   46.80
   5   6   1  638.74   43.30
   5   6   1  669.73   43.70
   5   6   1  589.84   46.30
   5   6   1  560.44   50.09
   5   6   1  650.53   47.20
   5   6   1  607.84   53.19
   5   6   1  592.94   43.20
  -6  -6  -1  218.08   28.50
  -6  -6  -1  285.57   27.80
  -6  -6  -1  286.57   34.10
  -6  -6  -1  279.87   29.40
  -6  -6  -1  234.78   24.70
  -6  -6  -1  246.68   43.40
  -6  -6  -1  288.57   33.20
   6   6   1  246.08   35.10
   6   6   1  245.28   30.20
   6   6   1  270.67   40.10
   6   6   1  255.77   33.00
   6   6   1  251.97   33.80
   6   6   1  308.27   30.20
   6   6   1  275.07   33.20
   6   6   1  253.17   29.20
   6   6   1  275.87   38.00
  -7  -6  -1    8.90   12.20
  -7  -6  -1  -32.40   15.50
  -7  -6  -1  -26.90   17.30
  -7  -6  -1   11.90   14.50
  -7  -6  -1   -4.70   12.70
  -7  -6  -1   -7.40   24.20
  -7  -6  -1  -14.00   16.70
  -7  -6  -1    4.90    8.40
  -7  -6  -1  -25.20   12.60
   7   6   1   27.30   16.50
   7   6   1   25.00   19.40
   7   6   1   -9.80   15.80
   7   6   1   18.90   15.90
   7   6   1  -33.30   20.00
   7   6   1   17.70   25.00
   7   6   1    5.10   19.90
  -8  -6  -1   25.50   12.00
  -8  -6  -1   11.80   22.60
  -8  -6  -1   50.79   18.40
  -8  -6  -1   26.40   35.70
  -8  -6  -1   64.49   25.40
   8   6   1   22.20   22.10
   8   6   1   49.90   25.40
   8   6   1    9.50   18.40
   8   6   1   25.80   20.20
   8   6   1   12.00   18.00
   8   6   1   46.40   22.30
   8   6   1   41.70   25.00
  -9  -6  -1   49.60   28.80
  -9  -6  -1  116.99   46.40
   9   6   1   75.99   28.40
   9   6   1   94.19   27.40
   9   6   1  -37.60   43.10
   9   6   1  103.29   27.10
   9   6   1  104.19   26.20
   9   6   1   31.60   25.50
   9   6   1   90.49   31.50
   9   6   1   93.19   26.70
 -10  -6  -1   36.10   40.80
 -10  -6  -1   19.60   30.20
 -10  -6  -1   40.70   30.30
 -10  -6  -1   17.00   16.70
 -10  -6  -1  -13.00   26.10
  10   6   1    4.00   25.00
  10   6   1  -14.90   23.70
  10   6   1   30.60   28.90
  10   6   1   -1.10   30.90
  10   6   1   -3.90   24.60
 -11  -6  -1   54.99   20.60
 -11  -6  -1   54.99   42.60
 -11  -6  -1   90.79   30.90
  11   6   1   68.79   38.50
  11   6   1   26.70   30.80
  11   6   1   19.60   28.00
  11   6   1    0.90   23.30
  11   6   1  116.99   32.50
  11   6   1   -7.30   27.90
  11   6   1   68.49   33.80
 -12  -6  -1   -6.40   47.10
 -12  -6  -1   98.39   38.80
 -12  -6  -1   23.40   24.10
 -12  -6  -1   32.70   28.60
  12   6   1    9.30   33.00
  12   6   1   29.90   43.80
  12   6   1   33.30   35.40
  12   6   1   79.99   37.40
  12   6   1  -36.70   31.90
  12   6   1   -7.20   24.10
 -13  -6  -1   43.60   48.90
 -13  -6  -1   21.90   45.40
  13   6   1   34.40   34.40
  13   6   1   44.10   33.50
  13   6   1   -1.10   25.70
  13   6   1   17.80   35.20
 -14  -6  -1   37.60   46.90
 -14  -6  -1   26.70   50.49
  14   6   1  -24.90   32.70
  14   6   1    2.70   29.60
  14   6   1   79.89   52.39
  14   6   1   46.60   40.00
  13  -7  -1  -30.60   39.50
  13  -7  -1   19.70   31.20
  13  -7  -1   58.39   62.99
 -13   7   1   90.49   49.20
 -13   7   1   -7.90   43.40
 -13   7   1  -75.39   35.10
  12  -7  -1   17.80   48.00
  12  -7  -1   17.80   38.70
  12  -7  -1  -10.10   24.40
  12  -7  -1  -29.00   28.30
 -12   7   1   12.90   31.90
 -12   7   1    1.40   38.00
 -12   7   1  -33.60   32.70
 -12   7   1   36.00   45.00
  11  -7  -1   47.60   24.70
  11  -7  -1    7.90   34.70
  11  -7  -1   34.10   37.80
  11  -7  -1  -34.70   43.70
 -11   7   1   23.00   36.60
 -11   7   1   37.40   30.40
 -11   7   1   30.40   43.20
 -11   7   1   29.60   30.40
  10  -7  -1  -14.90   30.80
  10  -7  -1    2.70   41.80
  10  -7  -1   12.90   36.70
  10  -7  -1   22.90   31.10
 -10   7   1   52.09   30.90
 -10   7   1   -5.00   32.90
 -10   7   1    0.50   38.60
 -10   7   1   64.99   35.50
 -10   7   1   18.00   28.40
   9  -7  -1  194.58   40.10
   9  -7  -1  146.69   27.30
   9  -7  -1  198.28   43.30
   9  -7  -1  186.08   54.19
   9  -7  -1  242.88   55.59
  -9   7   1  149.88   56.29
  -9   7   1  137.99   43.30
  -9   7   1  179.38   48.60
  -9   7   1  186.88   24.00
  -9   7   1  230.88   43.90
  -9   7   1  193.58   39.90
   8  -7  -1  -16.80   15.80
   8  -7  -1  -16.20   29.50
   8  -7  -1   22.20   36.50
   8  -7  -1   21.90   27.00
   8  -7  -1   -8.50   23.70
  -8   7   1    6.20   13.90
  -8   7   1   33.90   60.19
  -8   7   1   -4.30   21.20
  -8   7   1   11.00   25.70
  -8   7   1   42.80   28.40
  -8   7   1  -10.00   32.80
  -8   7   1   43.30   24.70
   7  -7  -1   -9.00   23.20
   7  -7  -1   14.90   14.20
   7  -7  -1   -2.30   22.50
   7  -7  -1   -1.20   35.90
   7  -7  -1  -31.80   21.90
   7  -7  -1  -22.70   17.80
   7  -7  -1   -1.90   24.10
  -7   7   1   12.90   35.00
  -7   7   1  -41.00   27.40
  -7   7   1    0.60   19.40
  -7   7   1  -19.20   19.90
  -7   7   1   22.20   27.20
  -7   7   1   -9.50   18.40
   6  -7  -1  147.59   35.00
   6  -7  -1  174.68   30.60
   6  -7  -1  154.58   29.80
   6  -7  -1   93.49   24.40
   6  -7  -1  184.48   38.30
   6  -7  -1  135.49   32.10
   6  -7  -1  167.08   20.10
  -6   7   1   73.89   26.80
  -6   7   1  119.29   34.90
  -6   7   1   93.29   34.80
  -6   7   1  129.89   35.00
  -6   7   1  109.19   27.50
  -6   7   1  126.89   28.10
  -6   7   1  142.69   27.60
   5  -7  -1   56.89   29.60
   5  -7  -1  -10.70   19.30
   5  -7  -1  -11.10    8.10
   5  -7  -1   -4.20   22.70
   5  -7  -1   15.60   18.20
   5  -7  -1  -22.60   16.10
   5  -7  -1   -5.80   13.60
   5  -7  -1   -2.70   24.20
  -5   7   1   11.30   17.30
  -5   7   1   31.10   24.60
  -5   7   1    9.30   18.20
  -5   7   1   14.30   24.80
  -5   7   1   16.80   18.10
  -5   7   1   16.70   21.20
  -5   7   1  -12.00   32.50
   4  -7  -1   51.79   10.20
   4  -7  -1   51.59   19.90
   4  -7  -1   92.09   29.60
   4  -7  -1   52.99   23.10
   4  -7  -1   41.20   16.00
   4  -7  -1   36.20   18.90
   4  -7  -1   43.30   20.20
   4  -7  -1   35.10   26.70
  -4   7   1   17.80   18.70
  -4   7   1   64.29   27.60
  -4   7   1   71.49   22.30
  -4   7   1   20.60   19.40
  -4   7   1   21.40   17.90
  -4   7   1   43.20   17.90
  -4   7   1   89.69   28.40
  -4   7   1   58.19   22.90
   3  -7  -1 1175.08   74.89
   3  -7  -1 1107.69   69.39
   3  -7  -1 1206.78   81.99
   3  -7  -1 1251.27   76.99
   3  -7  -1 1173.18   83.29
   3  -7  -1 1162.58   61.39
   3  -7  -1 1231.28   73.39
   3  -7  -1 1132.69   71.39
  -3   7   1 1126.69   83.79
  -3   7   1 1112.69   70.79
  -3   7   1 1172.18   78.59
  -3   7   1  939.51   85.09
  -3   7   1 1071.89   72.49
  -3   7   1 1048.20   85.19
  -3   7   1 1050.49   91.09
  -3   7   1 1111.29   73.19
   2  -7  -1 2666.53  143.79
   2  -7  -1 2513.05  140.49
   2  -7  -1 2605.44  143.19
   2  -7  -1 2686.03  149.59
   2  -7  -1 2510.85  137.79
   2  -7  -1 2655.23  149.29
   2  -7  -1 2788.42  141.79
   2  -7  -1 2522.95  138.59
   2  -7  -1 2641.74  133.19
  -2   7   1 2539.85  148.49
  -2   7   1 2701.83  142.69
  -2   7   1 2621.14  149.79
  -2   7   1 2662.53  145.39
  -2   7   1 2564.14  140.49
  -2   7   1 2375.26  146.49
  -2   7   1 2463.15  141.89
  -2   7   1 2493.15  146.49
   1  -7  -1 1192.48   79.09
   1  -7  -1 1303.17   78.89
   1  -7  -1 1229.08   64.29
   1  -7  -1 1198.48   67.09
   1  -7  -1 1081.69   68.09
   1  -7  -1 1081.69   70.89
   1  -7  -1 1216.38   69.49
  -1   7   1 1208.68   64.49
  -1   7   1 1205.18   73.69
  -1   7   1 1305.77   79.69
  -1   7   1 1105.39   70.49
  -1   7   1 1094.69   75.99
  -1   7   1 1244.08   71.59
  -1   7   1 1125.19   84.89
   0  -7  -1   42.30   11.90
   0  -7  -1   55.69   11.20
   0  -7  -1   77.09   15.10
   0  -7  -1   76.59   22.60
   0  -7  -1   50.99   10.00
   0  -7  -1   49.30   15.00
   0  -7  -1   64.39   18.90
   0  -7  -1   51.29   15.60
   0   7   1   54.19   15.50
   0   7   1   42.10   25.80
   0   7   1   46.50   14.30
   0   7   1   74.79   22.30
   0   7   1   83.49   22.80
   0   7   1   51.79   14.40
   0   7   1   33.90   19.30
   0   7   1   44.30   13.90
  -1  -7  -1  417.36   43.30
  -1  -7  -1  405.76   31.60
  -1  -7  -1  440.96   35.70
  -1  -7  -1  383.26   30.50
  -1  -7  -1  408.26   51.29
   1   7   1  400.66   35.40
   1   7   1  427.96   34.10
   1   7   1  473.05   40.20
   1   7   1  386.76   35.60
   1   7   1  342.77   30.80
   1   7   1  421.56   30.60
   1   7   1  477.45   51.99
   1   7   1  351.96   44.20
   1   7   1  400.76   29.60
   1   7   1  458.65   31.80
  -2  -7  -1   11.90    9.90
  -2  -7  -1   25.10    9.40
  -2  -7  -1   35.80   12.90
  -2  -7  -1  -11.20   22.90
   2   7   1   35.10   12.30
   2   7   1   21.20    8.40
   2   7   1   26.30   18.10
   2   7   1   14.00   15.30
   2   7   1    1.10   15.10
   2   7   1   31.90   12.20
   2   7   1   27.90   11.00
   2   7   1    7.10   10.10
   2   7   1    8.20   16.50
   2   7   1    7.90   20.60
   2   7   1   14.20   12.30
  -3  -7  -1  133.29   34.20
  -3  -7  -1   94.29   14.50
  -3  -7  -1  103.39   17.40
  -3  -7  -1   91.59   24.60
  -3  -7  -1  108.79   16.50
  -3  -7  -1   89.69   14.70
   3   7   1  136.49   23.60
   3   7   1  147.19   29.80
   3   7   1   88.89   17.40
   3   7   1   97.49   21.00
   3   7   1   42.90   26.50
   3   7   1   83.89   14.80
   3   7   1  108.39   16.50
   3   7   1  115.39   18.00
   3   7   1  100.49   23.80
  -4  -7  -1  822.72   55.89
  -4  -7  -1  880.01   53.99
  -4  -7  -1  846.62   57.29
  -4  -7  -1  833.82   53.49
  -4  -7  -1  925.21   80.99
   4   7   1  924.31   56.49
   4   7   1 1035.90   81.49
   4   7   1  906.01   65.69
   4   7   1  851.11   57.29
   4   7   1  803.02   67.69
   4   7   1  955.30   65.19
   4   7   1  948.61   60.99
   4   7   1  894.51   55.49
   4   7   1  817.12   65.59
   4   7   1  901.21   58.29
   4   7   1  958.40   55.79
  -5  -7  -1  685.93   44.60
  -5  -7  -1  594.54   52.69
  -5  -7  -1  752.32   75.59
  -5  -7  -1  691.33   47.90
  -5  -7  -1  742.73   52.59
  -5  -7  -1  568.04   48.10
   5   7   1  625.44   54.19
   5   7   1  708.63   46.90
   5   7   1  669.83   46.70
   5   7   1  580.24   57.59
   5   7   1  727.63   52.49
   5   7   1  580.34   57.19
   5   7   1  669.03   57.39
   5   7   1  697.33   49.99
   5   7   1  733.53   64.99
   5   7   1  600.64   49.10
  -6  -7  -1  153.58   27.30
  -6  -7  -1  200.38   32.00
  -6  -7  -1  204.28   27.40
  -6  -7  -1  203.18   24.00
  -6  -7  -1  177.98   45.10
  -6  -7  -1  210.68   24.30
   6   7   1  202.18   26.50
   6   7   1  142.39   30.20
   6   7   1  158.88   32.30
   6   7   1  193.08   29.90
   6   7   1  215.18   26.90
   6   7   1  176.98   28.40
   6   7   1  170.98   32.60
   6   7   1  238.48   39.60
  -7  -7  -1  118.79   26.40
  -7  -7  -1  145.09   22.50
  -7  -7  -1  178.28   46.50
  -7  -7  -1  129.69   27.10
   7   7   1  124.99   22.80
   7   7   1  104.99   28.70
   7   7   1  103.99   25.30
   7   7   1  185.08   29.00
   7   7   1   34.10   32.00
   7   7   1  147.79   30.80
   7   7   1  136.19   24.50
   7   7   1  125.69   26.00
  -8  -7  -1   94.89   28.00
  -8  -7  -1  110.29   22.10
  -8  -7  -1  133.99   44.90
   8   7   1  107.69   27.00
   8   7   1   79.09   24.00
   8   7   1  127.69   25.50
   8   7   1  152.08   30.00
   8   7   1  166.88   30.10
   8   7   1  124.19   24.90
   8   7   1   63.89   46.00
   8   7   1  124.09   49.20
  -9  -7  -1  167.28   36.00
  -9  -7  -1  180.28   28.50
  -9  -7  -1  178.08   52.09
   9   7   1  155.68   29.00
   9   7   1  173.78   32.00
   9   7   1  171.48   42.60
   9   7   1  147.69   34.40
   9   7   1  184.48   31.80
   9   7   1  137.49   34.90
   9   7   1  131.79   33.80
 -10  -7  -1   60.39   31.80
 -10  -7  -1   77.29   29.50
 -10  -7  -1   -9.10   42.20
 -10  -7  -1   59.59   23.50
  10   7   1   53.19   29.00
  10   7   1   41.90   27.80
  10   7   1   74.89   28.80
  10   7   1   14.60   29.80
  10   7   1   53.29   38.20
  10   7   1   62.39   34.20
  10   7   1   68.49   25.10
 -11  -7  -1   62.39   23.20
 -11  -7  -1  138.99   44.30
 -11  -7  -1  117.99   55.19
 -11  -7  -1   46.00   31.80
 -11  -7  -1  134.99   39.50
  11   7   1   99.29   36.70
  11   7   1   50.89   31.60
  11   7   1  130.19   34.40
  11   7   1  131.99   36.80
  11   7   1   92.79   41.60
  11   7   1  173.68   34.00
 -12  -7  -1  -31.90   47.40
 -12  -7  -1  -28.50   20.20
  12   7   1  -43.00   33.30
  12   7   1  -26.80   26.10
  12   7   1   48.30   31.90
  12   7   1  -21.60   44.50
  12   7   1   55.99   36.70
  12   7   1   28.90   27.50
 -13  -7  -1  -11.00   50.29
 -13  -7  -1   55.09   43.50
  13   7   1   45.70   33.50
  13   7   1   19.30   32.60
  13   7   1   -3.60   28.00
  13   7   1   25.30   31.90
  13  -8  -1  -72.69   39.10
  13  -8  -1  -85.39   51.89
  13  -8  -1   17.10   41.50
 -13   8   1   -9.80   38.00
 -13   8   1  -32.80   37.10
 -13   8   1  -50.29   43.30
[truncated: 3,459,239 more chars]
